# Supplementary material for: In Silico Identification of the Complex Interplay between Regulatory SNPs, Transcription Factors, and Their Related Genes in Brassica napus L. Using Multi-Omics Data
Source: MDPI journal article supplement (doi:10.3390/ijms22020789), 2021-01-14
Supplement: s1 [file s1]

Archive with 7 entries (7 files):
- Suppl_Material/Suppl_FiguresS1_treemaps_sig_GO_BP.pdf
- Suppl_Material/Suppl_TableS1_DEGs.xlsx
- Suppl_Material/Suppl_TableS2_GO_terms_DEGs.xlsx
- Suppl_Material/Suppl_TableS3_enriched_TFs.xlsx
- Suppl_Material/Suppl_TableS4_rSNPs_with_TFBS_predictions.xlsx
- Suppl_Material/Suppl_TableS5_important_rSNPs.xlsx
- Suppl_Material/Suppl_TableS6_DEGs_harboring_important_rSNPs_GO_BP_and_KEGG_enrichment.xlsx
