# Supplementary material for: In Silico Identification of the Complex Interplay between Regulatory SNPs, Transcription Factors, and Their Related Genes in Brassica napus L. Using Multi-Omics Data
Source: MDPI journal article supplement (doi:10.3390/ijms22020789), 2021-01-14
Supplement: s1 [file s1 › Suppl_Material/Suppl_FiguresS1_treemaps_sig_GO_BP.pdf]

**Supplementary Figures S1:** Treemaps for the enriched GO terms (biological processes) of the DEGs, separated into up- and down-regulated DEGs

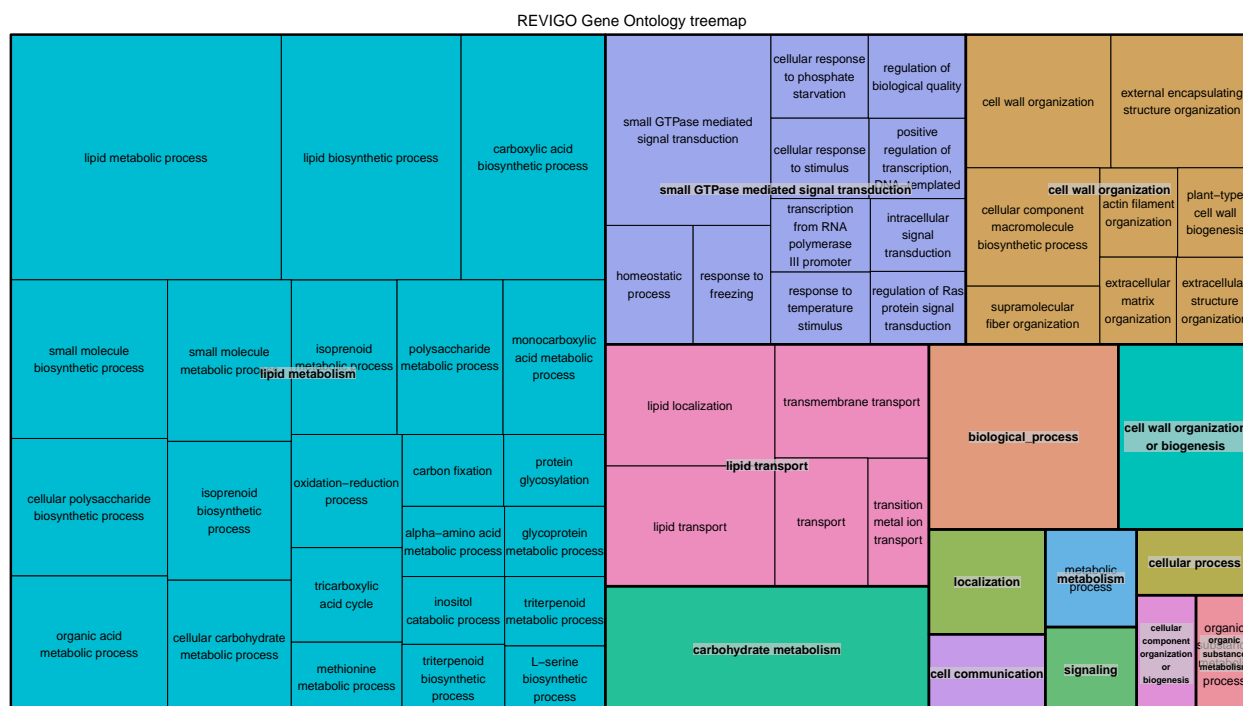

**Figure S1.1:** Treemap for the enriched GO terms (biological processes) of the up-regulated flower DEGs. The treemap is created using the applications g:Profiler followed by REVIGO.

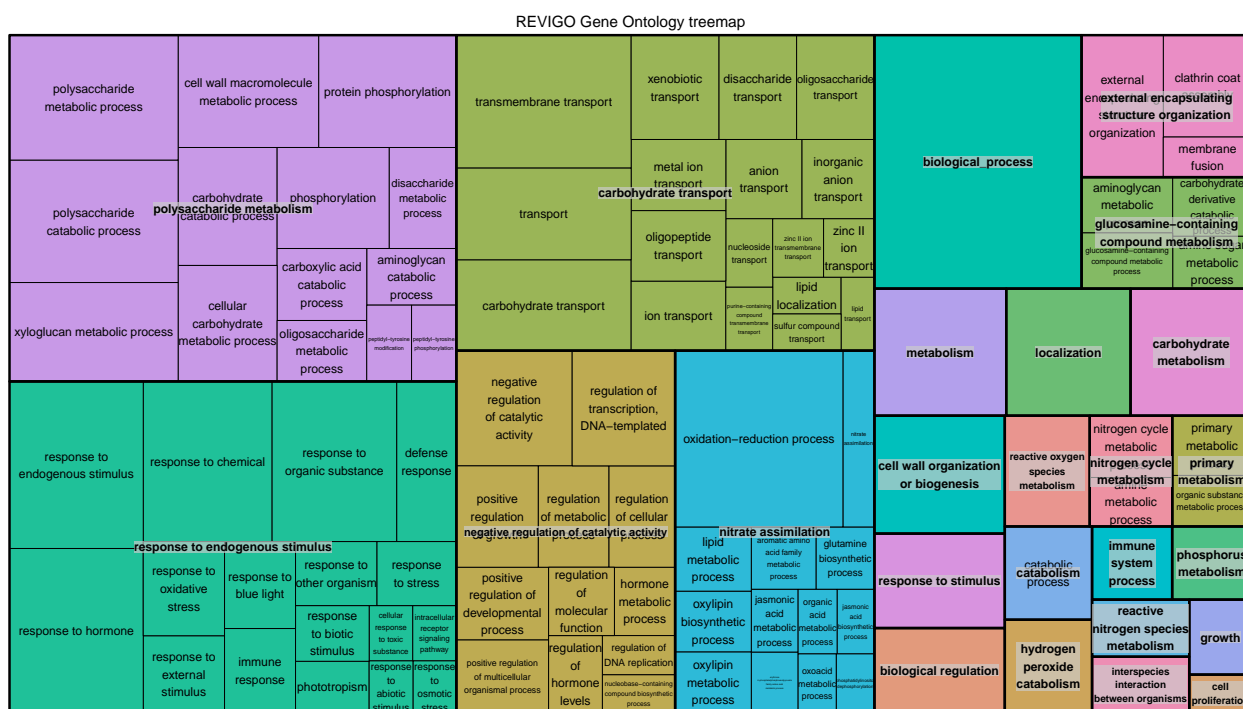

**Figure S1.2:** Treemap for the enriched GO terms (biological processes) of the down-regulated flower DEGs. The treemap is created using the applications g:Profiler followed by REVIGO.

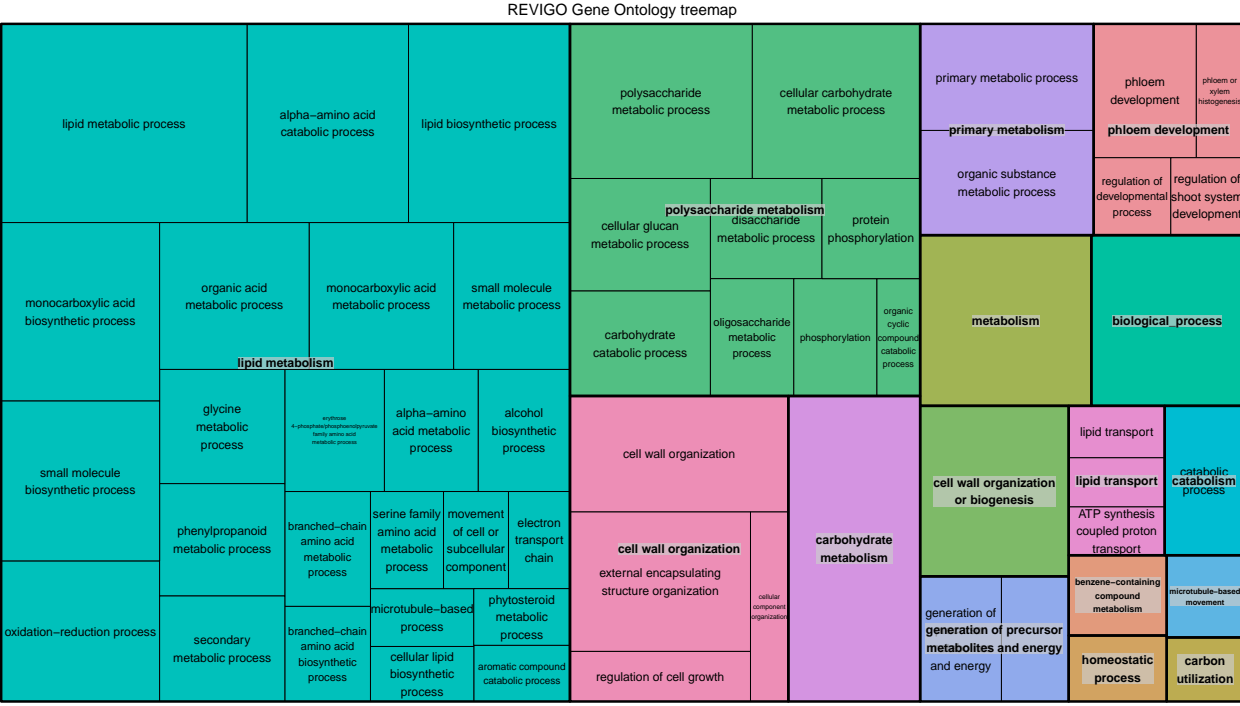

**Figure S1.3:** Treemap for the enriched GO terms (biological processes) of the up-regulated leaf DEGs. The treemap is created using the applications g:Profiler followed by REVIGO.

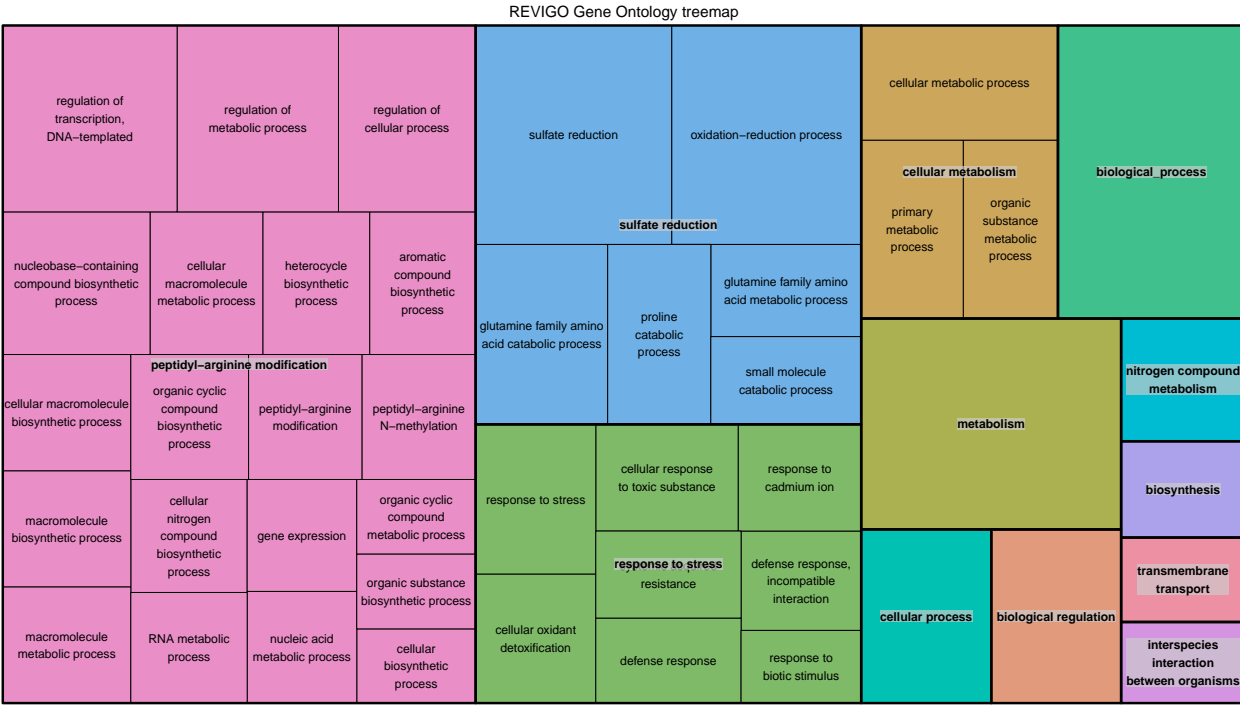

**Figure S1.4:** Treemap for the enriched GO terms (biological processes) of the down-regulated leaf DEGs. The treemap is created using the applications g:Profiler followed by REVIGO.

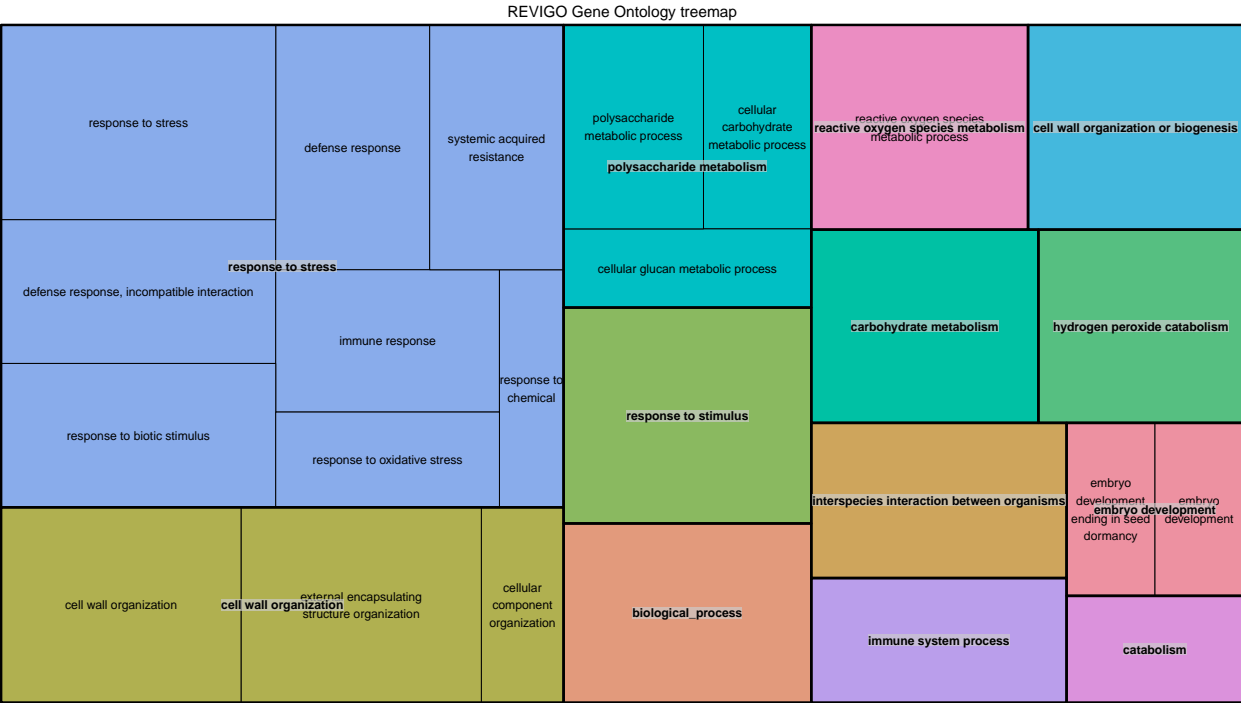

**Figure S1.5:** Treemap for the enriched GO terms (biological processes) of the up-regulated stem DEGs. The treemap is created using the applications g:Profiler followed by REVIGO.

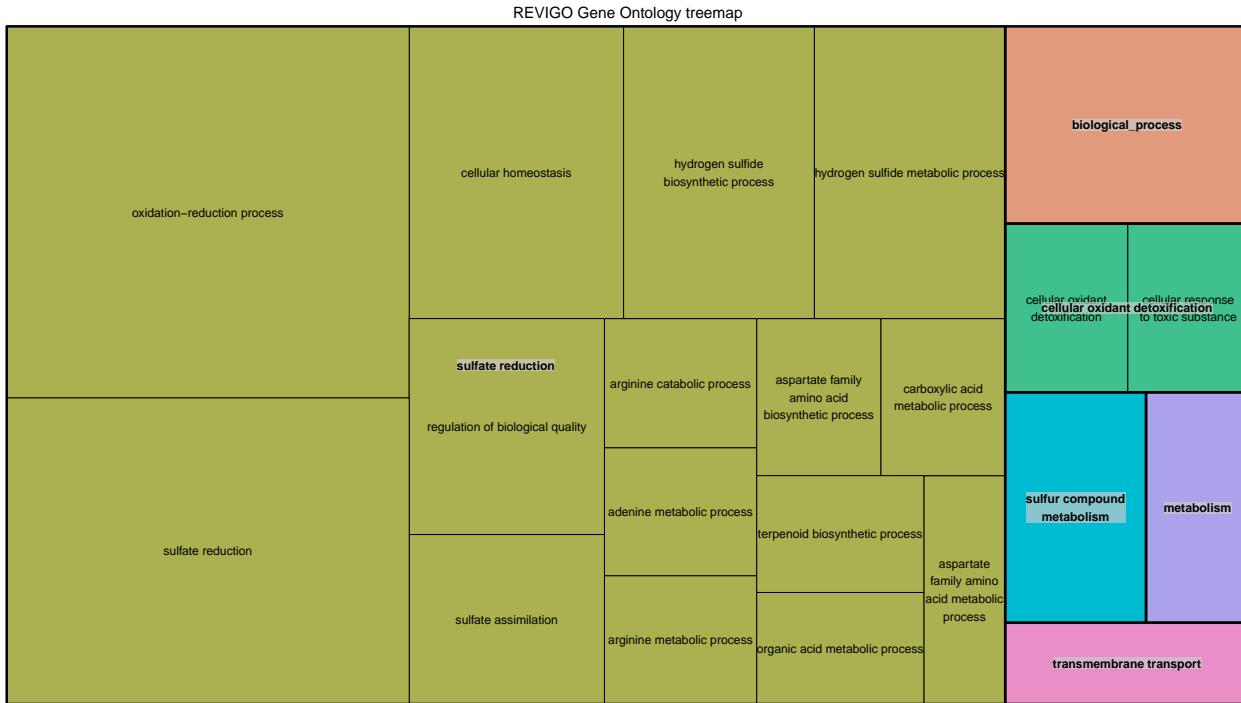

**Figure S1.6:** Treemap for the enriched GO terms (biological processes) of the down-regulated stem DEGs. The treemap is created using the applications g:Profiler followed by REVIGO.

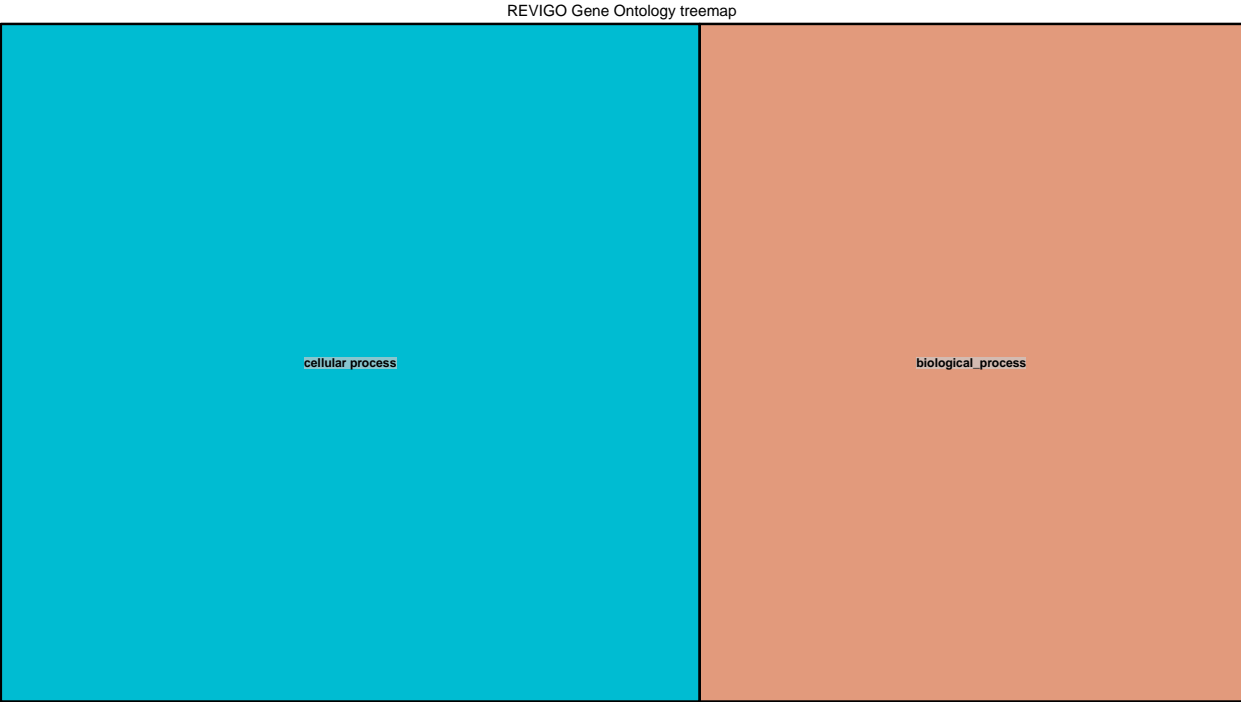

**Figure S1.7:** Treemap for the enriched GO terms (biological processes) of the up-regulated root DEGs. The treemap is created using the applications g:Profiler followed by REVIGO.

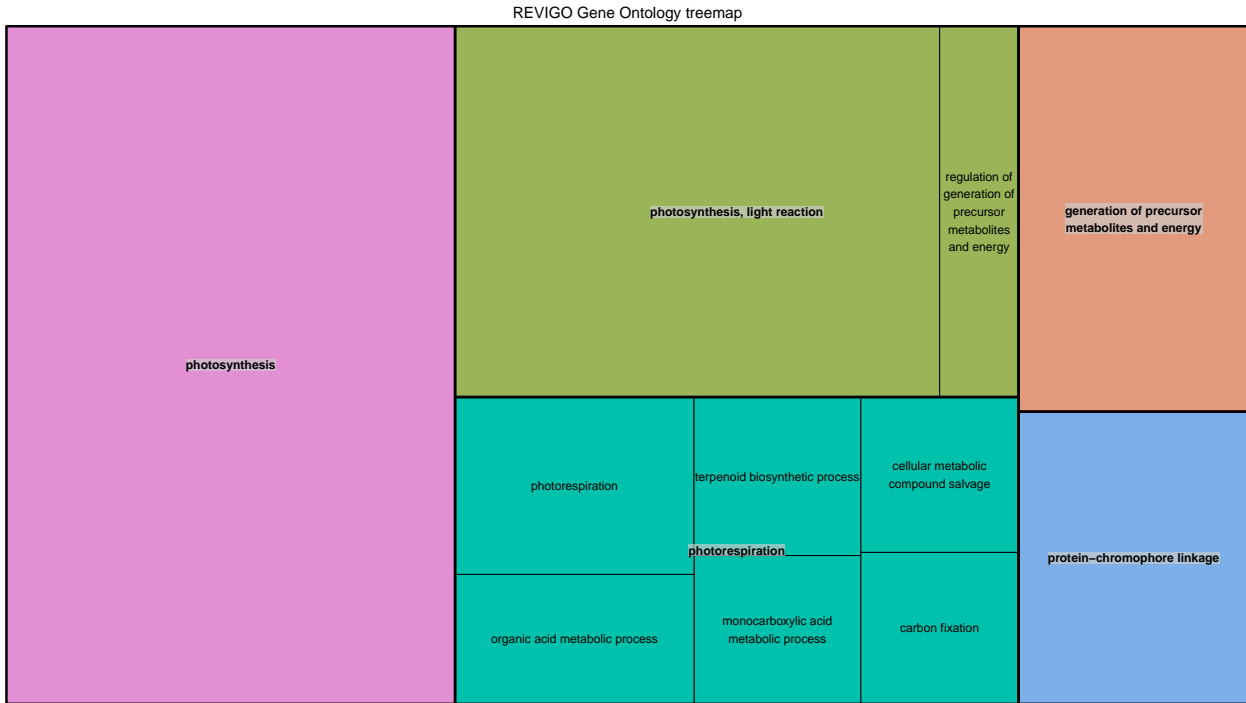

**Figure S1.8:** Treemap for the enriched GO terms (biological processes) of the down-regulated root DEGs. The treemap is created using the applications g:Profiler followed by REVIGO.
