# Supplementary material for: In Silico Identification of the Complex Interplay between Regulatory SNPs, Transcription Factors, and Their Related Genes in Brassica napus L. Using Multi-Omics Data
Source: MDPI journal article supplement (doi:10.3390/ijms22020789), 2021-01-14
Supplement: s1 [file s1 › Suppl_Material/Suppl_TableS1_DEGs.xlsx]

## Sheet: DEGs_flower
gene	baseMean	log2FoldChange	lfcSE	stat	pvalue	padj
BnaA01g00140D	74.4065	-2.46882	0.672693	-3.66611	0.000246266	0.00127574
BnaA01g00210D	3792.58	-2.79137	0.386348	-7.22483	5.01745e-13	1.07405e-11
BnaA01g00240D	201.099	9.83931	1.32712	7.41356	1.22958e-13	2.8154e-12
BnaA01g00250D	38.1847	-2.45617	0.64991	-3.77071	0.000162785	0.000879643
BnaA01g00300D	23.8579	2.37596	0.807519	2.93331	0.00335368	0.0125634
BnaA01g00360D	12.787	2.54195	1.01323	2.4903	0.0127636	0.0389089
BnaA01g00480D	264.276	-3.50386	0.45263	-7.73398	1.04234e-14	2.69746e-13
BnaA01g00530D	33.5474	7.45534	1.385	5.38193	7.36918e-08	7.52301e-07
BnaA01g00590D	186.302	-2.7348	0.407095	-6.71385	1.8956e-11	3.29497e-10
BnaA01g00600D	114.672	-4.13824	0.737461	-5.58949	2.27732e-08	2.52788e-07
BnaA01g00690D	147.177	-4.5618	0.61338	-7.39962	1.36577e-13	3.1072e-12
BnaA01g00740D	9.15641	3.68037	1.30198	2.71205	0.00668675	0.0225484
BnaA01g00790D	25.2943	-6.86494	1.47971	-4.63436	3.58051e-06	2.7328e-05
BnaA01g00810D	17.0196	4.46844	1.29292	3.29219	0.000994102	0.00438285
BnaA01g00820D	63.865	-8.25678	1.35526	-6.09168	1.1173e-09	1.51223e-08
BnaA01g00830D	10.3091	-3.81197	1.30363	-2.79545	0.00518271	0.0182051
BnaA01g00900D	90.9096	-5.12258	0.660118	-7.63463	2.26472e-14	5.59966e-13
BnaA01g00910D	149.593	7.47617	1.78117	4.15481	3.25561e-05	0.000204639
BnaA01g00990D	329.856	-2.44732	0.445577	-5.49126	3.99075e-08	4.26024e-07
BnaA01g01010D	10.8663	-3.87849	1.24151	-2.98395	0.00284551	0.0109091
BnaA01g01090D	165.069	-4.94534	0.707631	-6.94525	3.77804e-12	7.24314e-11
BnaA01g01140D	62.1793	-4.29289	0.649659	-6.53777	6.2442e-11	1.00684e-09
BnaA01g01200D	127.733	2.58073	0.573229	4.49921	6.8206e-06	4.93826e-05
BnaA01g01260D	172.247	-9.5694	1.32972	-7.19611	6.19566e-13	1.31098e-11
BnaA01g01280D	35.576	4.36745	0.801369	5.34198	9.1935e-08	9.22798e-07
BnaA01g01300D	102.358	-2.7351	0.549255	-4.97443	6.54412e-07	5.69779e-06
BnaA01g01320D	31.3531	-3.67061	0.799511	-4.53982	5.63034e-06	4.14008e-05
BnaA01g01400D	1395.31	-3.88222	0.331892	-11.6945	1.3601e-31	1.65761e-29
BnaA01g01490D	80.7756	-8.5104	1.37694	-6.17903	6.44968e-10	9.02057e-09
BnaA01g01510D	133.5	7.16793	0.82634	8.02926	9.80635e-16	2.85397e-14
BnaA01g01550D	288.553	-2.49579	0.391856	-6.36742	1.92231e-10	2.8807e-09
BnaA01g01610D	108.389	6.86839	0.848385	7.52855	5.1307e-14	1.22098e-12
BnaA01g01830D	727.556	-11.4442	1.29319	-8.70444	3.19155e-18	1.21413e-16
BnaA01g01860D	37.1702	-7.50449	1.39217	-5.38915	7.07922e-08	7.24784e-07
BnaA01g01960D	121.158	-2.1276	0.525186	-4.04946	5.13349e-05	0.000310264
BnaA01g02010D	8.48854	5.44757	1.56655	3.47207	0.00051646	0.00246239
BnaA01g02040D	68.2862	4.0496	0.651511	6.17388	6.66332e-10	9.29983e-09
BnaA01g02140D	11.57	5.92384	1.50644	3.92893	8.53263e-05	0.000491552
BnaA01g02240D	261.503	-2.42459	0.553648	-4.37816	1.19685e-05	8.23875e-05
BnaA01g02250D	624.381	-10.2684	1.03138	-7.71845	1.17757e-14	3.01374e-13
BnaA01g02380D	4.10867	4.29129	1.73843	2.45662	0.014025	0.0420781
BnaA01g02390D	20.5145	6.73385	1.44292	4.66479	3.08931e-06	2.388e-05
BnaA01g02450D	73.829	-5.07575	0.854098	-5.83678	5.32202e-09	6.51e-08
BnaA01g02460D	41.3315	-4.64769	1.06208	-4.28079	1.86233e-05	0.000123519
BnaA01g02550D	7.66026	-4.07237	1.48554	-2.54399	0.0109595	0.0342517
BnaA01g02560D	6.49251	5.02344	1.62495	3.08446	0.00203923	0.00820112
BnaA01g02580D	242.126	-8.34845	0.926333	-7.93302	2.13882e-15	5.97648e-14
BnaA01g02720D	6.13345	-4.84543	1.65409	-2.92037	0.00349614	0.013011
BnaA01g02750D	10.8061	-2.99811	1.17873	-2.50222	0.0123417	0.0378453
BnaA01g02760D	6.82119	-5.0463	1.61108	-3.12554	0.00177481	0.00726608
BnaA01g02780D	1125	-4.33299	1.01745	-4.2577	2.06543e-05	0.000135756
BnaA01g02930D	447.311	2.96099	0.40404	7.3264	2.3641e-13	5.2223e-12
BnaA01g03010D	75.9901	-2.89829	0.636498	-4.54536	5.48414e-06	4.03928e-05
BnaA01g03090D	1965.78	-5.69138	0.388155	-14.6494	1.36011e-48	4.76565e-46
BnaA01g03100D	72.0867	3.00069	0.659831	4.53903	5.6514e-06	4.15442e-05
BnaA01g03290D	36.154	2.78589	0.667474	4.15969	3.18675e-05	0.000200689
BnaA01g03520D	18.3516	-5.35594	1.27757	-3.72129	0.000198211	0.00105124
BnaA01g03570D	56.4378	2.91743	0.598278	4.86466	1.14652e-06	9.58145e-06
BnaA01g03650D	233.263	-2.07033	0.401632	-5.15372	2.55369e-07	2.38567e-06
BnaA01g03680D	521.723	-2.19281	0.380993	-5.75487	8.67062e-09	1.02802e-07
BnaA01g03770D	90.4551	5.98817	0.738089	7.81264	5.6001e-15	1.49427e-13
BnaA01g03830D	90.4849	-2.33846	0.531021	-4.40044	1.08031e-05	7.5054e-05
BnaA01g03930D	18.9056	6.64719	1.43599	4.62731	3.70446e-06	2.81892e-05
BnaA01g03980D	13.6386	5.01795	1.3234	3.36702	0.000759858	0.00346599
BnaA01g04000D	1449.86	-3.05907	0.305324	-10.0181	1.26941e-23	8.18496e-22
BnaA01g04050D	79.4584	2.27918	0.525636	4.33263	1.47336e-05	9.97836e-05
BnaA01g04070D	11.3939	-3.48228	1.14751	-2.95171	0.0031602	0.0119301
BnaA01g04190D	10.6008	3.35896	1.22807	2.67215	0.00753668	0.0250107
BnaA01g04240D	38.393	7.63039	1.38077	5.52528	3.28952e-08	3.55801e-07
BnaA01g04250D	40.3687	4.78348	0.839325	5.5493	2.86811e-08	3.13079e-07
BnaA01g04260D	64.6018	7.23766	1.13385	5.25738	1.46122e-07	1.41599e-06
BnaA01g04370D	71.9988	-8.41015	1.35445	-6.20853	5.34833e-10	7.57973e-09
BnaA01g04410D	16.8772	5.31566	1.2885	3.62483	0.000289153	0.00147312
BnaA01g04500D	35.4962	7.44412	1.42691	5.21437	1.84441e-07	1.76073e-06
BnaA01g04640D	316.908	-3.08624	0.387081	-7.96916	1.59757e-15	4.53544e-14
BnaA01g04650D	95.3496	-2.74449	0.512952	-5.34396	9.09358e-08	9.13802e-07
BnaA01g04710D	19.4269	2.13347	0.851609	2.49837	0.0124767	0.0382091
BnaA01g04810D	32.9907	-7.34507	1.39753	-5.25438	1.48528e-07	1.43748e-06
BnaA01g04900D	11.2104	2.81151	1.07341	2.58862	0.00963612	0.030733
BnaA01g04990D	224.335	9.95299	1.33861	7.43448	1.04981e-13	2.42356e-12
BnaA01g05000D	26.2511	7.10063	1.40977	5.03543	4.76784e-07	4.25273e-06
BnaA01g05160D	26.8654	6.00174	1.22512	4.20476	2.61362e-05	0.000168176
BnaA01g05170D	264.702	7.79238	0.746198	9.79787	1.1498e-22	6.78155e-21
BnaA01g05240D	550.469	3.0056	0.426099	7.05211	1.76223e-12	3.52043e-11
BnaA01g05250D	5.8918	4.82418	1.6711	2.87741	0.00400951	0.0146152
BnaA01g05280D	53.9471	-2.432	0.573749	-4.23226	2.31356e-05	0.000150633
BnaA01g05340D	383.374	-8.24423	0.741204	-10.3977	2.53882e-25	1.87315e-23
BnaA01g05480D	280.069	2.5564	0.365972	6.98316	2.88613e-12	5.62431e-11
BnaA01g05520D	9.28866	-3.64484	1.26731	-2.75798	0.00581598	0.0200319
BnaA01g05580D	50.7406	6.23063	0.995096	5.70717	1.14869e-08	1.33869e-07
BnaA01g05590D	37.3218	6.46968	1.185	4.61064	4.01437e-06	3.03523e-05
BnaA01g05710D	45.4066	4.51947	0.755522	5.87587	4.20623e-09	5.22434e-08
BnaA01g05760D	17.1863	-2.09769	0.863065	-2.42254	0.0154125	0.0455291
BnaA01g05900D	445.371	2.00303	0.352917	5.67511	1.38599e-08	1.58953e-07
BnaA01g05990D	182.205	2.2353	0.4202	5.31797	1.04933e-07	1.04264e-06
BnaA01g06040D	81.1278	-2.70539	0.503781	-5.3627	8.19887e-08	8.30949e-07
BnaA01g06120D	114.786	-4.99821	0.76377	-6.47898	9.23458e-11	1.44612e-09
BnaA01g06160D	221.951	-2.24949	0.416288	-5.40226	6.58074e-08	6.77133e-07
BnaA01g06180D	6410.47	-2.129	0.454105	-4.6883	2.75479e-06	2.14907e-05
BnaA01g06190D	2256.15	3.33536	0.437692	7.61977	2.54125e-14	6.24572e-13
BnaA01g06420D	376.91	-3.68368	0.434199	-8.4772	2.30687e-17	7.9368e-16
BnaA01g06550D	11.1565	-5.80882	1.51006	-3.84331	0.000121386	0.000676031
BnaA01g06600D	12.5248	-2.85174	1.07558	-2.62193	0.00874322	0.028328
BnaA01g06620D	12.4996	-3.52298	1.2135	-2.83195	0.00462649	0.0165005
BnaA01g06730D	67.2032	-6.05052	0.966329	-5.91665	3.28561e-09	4.16045e-08
BnaA01g06740D	5.44571	-4.5435	1.74125	-2.5937	0.00949489	0.0303425
BnaA01g06750D	578.166	-4.27696	0.419326	-10.1907	2.18283e-24	1.50201e-22
BnaA01g07070D	20.1311	5.58849	1.25929	3.86109	0.000112883	0.000632447
BnaA01g07080D	11.5994	3.18653	1.10731	2.82674	0.00470241	0.0167207
BnaA01g07310D	115.738	4.15952	0.604751	6.84955	7.40805e-12	1.36521e-10
BnaA01g07530D	258.61	4.80739	0.469969	10.1943	2.10194e-24	1.45009e-22
BnaA01g07750D	281.87	3.4612	0.394678	8.76273	1.90579e-18	7.398e-17
BnaA01g07770D	22.3553	6.88787	1.41787	4.85651	1.19472e-06	9.96388e-06
BnaA01g07790D	137.432	8.28487	1.0873	6.09388	1.10206e-09	1.49198e-08
BnaA01g07840D	24.2861	4.31281	0.955568	4.38734	1.14746e-05	7.93157e-05
BnaA01g07910D	3077.84	-2.25176	0.417652	-5.39138	6.99188e-08	7.16392e-07
BnaA01g08170D	62.0967	-3.54938	0.817197	-4.32401	1.53216e-05	0.000103425
BnaA01g08220D	25.5368	2.2985	0.743582	3.08288	0.00205011	0.00823617
BnaA01g08230D	7.51428	4.11949	1.45455	2.59775	0.00938371	0.0300305
BnaA01g08240D	253.592	-3.52916	0.687857	-5.12587	2.96162e-07	2.7427e-06
BnaA01g08340D	59.5273	-2.04114	0.552356	-3.69231	0.000222224	0.00116319
BnaA01g08370D	70.0745	2.82659	0.606026	4.65644	3.21716e-06	2.47856e-05
BnaA01g08380D	1251.14	-6.31252	0.374062	-16.8292	1.49077e-63	1.30159e-60
BnaA01g08390D	247.006	-6.61382	0.603826	-10.7009	1.00801e-26	8.28484e-25
BnaA01g08400D	256.544	-6.28033	0.581537	-10.6299	2.16336e-26	1.73522e-24
BnaA01g08410D	173.905	-6.64393	0.688254	-9.3149	1.22073e-20	5.91042e-19
BnaA01g08420D	23.75	-3.29334	0.852141	-3.82565	0.000130425	0.00072165
BnaA01g08710D	485.403	-2.50214	0.344022	-7.272	3.54195e-13	7.68708e-12
BnaA01g08770D	73.983	-5.14706	0.738358	-6.82829	8.59339e-12	1.56608e-10
BnaA01g08790D	6.53116	5.04075	1.62123	3.10205	0.00192188	0.00779571
BnaA01g08830D	7.15773	4.02673	1.46277	2.53402	0.0112763	0.0350858
BnaA01g08860D	166.172	-4.00849	0.50906	-7.85379	4.03654e-15	1.09573e-13
BnaA01g08870D	79.0385	-4.31624	0.760724	-5.62953	1.80699e-08	2.03722e-07
BnaA01g08970D	5.27165	-4.59512	1.69691	-2.69657	0.00700583	0.0234728
BnaA01g09000D	7.80513	4.16641	1.45038	2.63188	0.00849144	0.0276586
BnaA01g09010D	9.02798	4.3807	1.40837	2.82715	0.00469649	0.0167038
BnaA01g09020D	162.195	2.12758	0.693224	3.06823	0.00215332	0.00858346
BnaA01g09090D	23.3503	-4.49593	1.16558	-3.71768	0.00020106	0.00106359
BnaA01g09190D	5.01146	-4.47008	1.73266	-2.56572	0.0102961	0.0325246
BnaA01g09200D	80.8908	-3.50955	0.577559	-6.05639	1.39215e-09	1.85129e-08
BnaA01g09210D	61.3618	-4.11138	0.692872	-5.88342	4.01883e-09	5.0138e-08
BnaA01g09410D	745.241	-8.15493	0.577559	-13.7198	7.73274e-43	1.97052e-40
BnaA01g09520D	812.787	-2.91371	0.362686	-8.03247	9.55274e-16	2.78625e-14
BnaA01g09590D	5.55247	4.78296	1.65939	2.87377	0.00405605	0.0147527
BnaA01g09780D	64.5091	-2.89981	0.551645	-5.24484	1.56415e-07	1.50915e-06
BnaA01g09830D	628.626	-2.06199	0.383548	-5.3757	7.62843e-08	7.77277e-07
BnaA01g09930D	165.065	-2.46455	0.402439	-6.12099	9.29975e-10	1.27031e-08
BnaA01g09950D	19.2502	4.34659	1.03022	4.06001	4.90696e-05	0.000297959
BnaA01g09990D	817.037	-2.17467	0.409309	-5.31271	1.08009e-07	1.06943e-06
BnaA01g10000D	762.146	-4.64652	0.621866	-7.46522	8.31591e-14	1.93913e-12
BnaA01g10030D	72.9515	-2.5189	0.53426	-4.709	2.48938e-06	1.95808e-05
BnaA01g10150D	29.7438	6.15543	1.20452	4.35697	1.31877e-05	9.00815e-05
BnaA01g10260D	13.2853	-3.34727	1.08151	-3.03363	0.0024163	0.00947991
BnaA01g10310D	32.8538	-3.46448	0.888943	-3.86474	0.000111208	0.0006241
BnaA01g10390D	1290.01	5.88191	0.3717	15.7984	3.19345e-56	1.66745e-53
BnaA01g10420D	14.8978	-3.50629	1.09134	-3.14645	0.00165264	0.00682522
BnaA01g10430D	25.6982	7.07533	1.41119	5.01221	5.38072e-07	4.76033e-06
BnaA01g10520D	46.0435	6.73259	1.18717	4.76974	1.84461e-06	1.48604e-05
BnaA01g10700D	43.3539	7.80936	1.36787	5.7084	1.14044e-08	1.32966e-07
BnaA01g10710D	9.90915	-4.49862	1.39269	-2.95146	0.0031628	0.0119365
BnaA01g10870D	5.88197	4.87488	1.64457	2.95643	0.00311219	0.0117763
BnaA01g11220D	276.466	5.57246	0.562976	9.83358	8.06953e-23	4.82352e-21
BnaA01g11230D	13.8869	-3.41849	1.06408	-3.14661	0.00165175	0.00682352
BnaA01g11330D	241.364	-2.1514	0.416017	-5.17026	2.33763e-07	2.20089e-06
BnaA01g11430D	175.963	-2.21965	0.406619	-5.45687	4.84606e-08	5.09769e-07
BnaA01g11450D	36.2069	2.70368	0.663064	4.06508	4.80162e-05	0.000292195
BnaA01g11510D	226.235	4.90037	0.461559	10.5695	4.12791e-26	3.23783e-24
BnaA01g11700D	189.842	-2.77974	0.437626	-6.34803	2.18086e-10	3.24351e-09
BnaA01g11760D	355.021	-2.58322	0.635699	-4.06261	4.85281e-05	0.000295074
BnaA01g11770D	592.547	-2.99224	0.583205	-5.12958	2.90394e-07	2.69163e-06
BnaA01g11880D	57.0576	3.28224	0.901858	3.62739	0.000286297	0.00145969
BnaA01g11910D	11.8327	-5.88915	1.50519	-3.90908	9.26501e-05	0.000529164
BnaA01g11920D	415.726	2.38143	0.371892	6.40257	1.52785e-10	2.32757e-09
BnaA01g12040D	1269.37	2.32383	0.421175	5.51724	3.44362e-08	3.71338e-07
BnaA01g12080D	511.28	-2.5088	0.413035	-6.07311	1.2546e-09	1.68101e-08
BnaA01g12090D	228.012	-2.23784	0.426536	-5.24509	1.56205e-07	1.50767e-06
BnaA01g12130D	61.7521	2.18273	0.545104	4.00058	6.31887e-05	0.000374054
BnaA01g12340D	45.5102	-2.94487	0.850304	-3.45351	0.000553333	0.00261812
BnaA01g12370D	15.4462	6.35435	1.46137	4.34598	1.38655e-05	9.43845e-05
BnaA01g12400D	72.44	-2.21414	0.669678	-3.30371	0.000954143	0.00423085
BnaA01g12420D	13.2754	-4.86458	1.33996	-3.28018	0.00103742	0.00455011
BnaA01g12440D	28.46	7.22592	1.39786	5.16809	2.36497e-07	2.2238e-06
BnaA01g12460D	32.6487	-2.54329	0.731507	-3.46641	0.000527457	0.00250798
BnaA01g12570D	754.938	-4.36535	0.519835	-8.39192	4.78272e-17	1.59601e-15
BnaA01g12620D	6.04062	-4.85437	1.6399	-2.95225	0.00315465	0.0119142
BnaA01g12680D	14.3923	2.53476	0.951779	2.64594	0.00814647	0.026718
BnaA01g12700D	22.953	5.75989	1.24586	4.0006	6.3182e-05	0.000374054
BnaA01g12760D	37.5787	7.61259	1.37641	5.52997	3.20288e-08	3.46994e-07
BnaA01g12770D	52.4825	8.06454	1.35993	5.92945	3.03943e-09	3.8745e-08
BnaA01g12780D	153.271	9.48309	1.3312	7.12325	1.05408e-12	2.16169e-11
BnaA01g12810D	180.152	-5.52985	0.532704	-10.2596	1.07174e-24	7.57027e-23
BnaA01g12840D	25.812	-5.89543	1.22889	-4.1854	2.84666e-05	0.000181678
BnaA01g12910D	7.76233	-3.36713	1.31305	-2.47166	0.0134488	0.0406995
BnaA01g12920D	25.511	-2.00977	0.735242	-2.72819	0.00636822	0.021658
BnaA01g12930D	279.348	-2.33261	0.608762	-3.83082	0.000127716	0.000708176
BnaA01g13090D	104.213	2.51313	0.474515	5.29201	1.2098e-07	1.18946e-06
BnaA01g13110D	37.9518	-4.38058	0.815786	-5.2646	1.40495e-07	1.3657e-06
BnaA01g13160D	16.0381	3.35722	1.01769	3.24957	0.0011558	0.0050087
BnaA01g13210D	54.2768	-2.56692	0.852773	-3.00512	0.00265474	0.0102679
BnaA01g13280D	369.976	-3.24466	0.432011	-7.50707	6.04668e-14	1.42685e-12
BnaA01g13290D	7.73195	-4.03206	1.46022	-2.56885	0.0102036	0.0322743
BnaA01g13340D	370.861	3.686	0.376475	9.78352	1.32522e-22	7.73056e-21
BnaA01g13350D	6.45657	-4.89414	1.66153	-2.93519	0.00333347	0.0124956
BnaA01g13370D	42.594	5.52729	0.912483	5.73238	9.90304e-09	1.16739e-07
BnaA01g13460D	229.397	2.79788	0.383187	7.29812	2.91822e-13	6.38806e-12
BnaA01g13540D	1109.89	2.2103	0.381131	5.79906	6.66868e-09	8.03909e-08
BnaA01g13620D	94.3825	3.15626	0.521784	6.03791	1.56121e-09	2.06478e-08
BnaA01g13640D	10.371	-5.57398	1.59291	-3.49085	0.000481489	0.00231503
BnaA01g13710D	132.394	-2.35411	0.480183	-4.89979	9.59415e-07	8.13524e-06
BnaA01g13850D	325.164	-3.41413	0.525229	-6.49615	8.24029e-11	1.30422e-09
BnaA01g13880D	1462.75	-4.14231	0.479077	-8.64406	5.42486e-18	2.0092e-16
BnaA01g14020D	138.899	2.80885	0.468039	5.99645	2.01678e-09	2.62877e-08
BnaA01g14260D	12.9611	2.7673	1.03476	2.64934	0.00806494	0.0264799
BnaA01g14320D	36.8345	-4.36069	0.804457	-5.31181	1.08539e-07	1.07428e-06
BnaA01g14360D	228.752	-7.51285	0.744218	-9.49276	2.2499e-21	1.18524e-19
BnaA01g14450D	1934.23	-2.62708	0.509414	-5.15684	2.51153e-07	2.34958e-06
BnaA01g14490D	166.709	-3.30587	0.465387	-7.09476	1.29576e-12	2.62498e-11
BnaA01g14560D	15.8028	-5.05929	1.35258	-3.37352	0.000742128	0.00339533
BnaA01g14800D	5.27165	-4.59512	1.69691	-2.69657	0.00700583	0.0234728
BnaA01g14820D	183.996	2.74421	0.442914	6.1924	5.92566e-10	8.33144e-09
BnaA01g14830D	67.0872	5.83478	0.808161	6.9011	5.16032e-12	9.74241e-11
BnaA01g14890D	195.067	5.59252	0.573823	9.6471	5.05636e-22	2.81691e-20
BnaA01g15000D	8.07336	-4.12015	1.43349	-2.66219	0.00776336	0.0256415
BnaA01g15090D	455.071	-10.8055	1.31868	-8.12382	4.51718e-16	1.36693e-14
BnaA01g15110D	74.7152	2.70461	0.522415	5.16974	2.34418e-07	2.20658e-06
BnaA01g15120D	487.247	7.03632	0.512903	13.5093	1.37791e-41	3.24717e-39
BnaA01g15220D	54.8402	2.21099	0.567046	3.89504	9.81843e-05	0.000557602
BnaA01g15240D	10.7223	-5.60654	1.59816	-3.49877	0.000467417	0.00225491
BnaA01g15250D	1392.82	-4.29132	0.328086	-13.0752	4.5628e-39	9.34654e-37
BnaA01g15350D	24.213	2.64185	0.802513	3.27786	0.00104598	0.00458273
BnaA01g15430D	214.884	-5.09082	0.494853	-10.2254	1.52646e-24	1.0697e-22
BnaA01g15460D	15.2084	-6.25868	1.46868	-4.25881	2.05518e-05	0.000135132
BnaA01g15570D	20.5899	4.0608	1.01989	3.88169	0.000103732	0.000585798
BnaA01g15700D	35.423	3.64221	0.7303	4.94181	7.73989e-07	6.66481e-06
BnaA01g15710D	189.215	6.81668	0.663472	9.90069	4.13431e-23	2.5251e-21
BnaA01g15770D	31.0452	-2.85782	0.72273	-3.9359	8.28868e-05	0.000479
BnaA01g15910D	111.711	-2.47864	0.696549	-3.55618	0.000376289	0.00185873
BnaA01g15990D	4.62225	4.48403	1.70672	2.61688	0.0088738	0.0286691
BnaA01g16010D	8.77034	-3.46268	1.32184	-2.5304	0.0113932	0.035375
BnaA01g16050D	72.7478	2.02781	0.500829	4.04637	5.20181e-05	0.00031393
BnaA01g16250D	16.0678	3.12803	0.979315	3.15698	0.0015941	0.00662195
BnaA01g16300D	29.4356	4.3281	0.865485	4.88455	1.03663e-06	8.73296e-06
BnaA01g16350D	45.9792	6.10221	1.00124	5.5641	2.63513e-08	2.89908e-07
BnaA01g16370D	459.323	-3.60426	0.372959	-9.6584	4.52896e-22	2.53104e-20
BnaA01g16400D	272.746	-5.48491	0.521023	-10.4573	1.35675e-25	1.02205e-23
BnaA01g16410D	713.296	9.52406	0.781366	10.9841	4.55541e-28	4.21942e-26
BnaA01g16670D	259.391	-10.0984	1.32643	-7.6128	2.68225e-14	6.57707e-13
BnaA01g16680D	14.8656	-2.53951	0.966877	-2.60833	0.00909865	0.0292588
BnaA01g16700D	31.3235	-3.21443	0.762624	-4.18656	2.83215e-05	0.000180817
BnaA01g16790D	14.3998	-6.17485	1.47782	-4.17557	2.9724e-05	0.00018873
BnaA01g16800D	9.48603	-5.56077	1.5404	-3.60565	0.000311373	0.00157308
BnaA01g16810D	7.66026	-4.07237	1.48554	-2.54399	0.0109595	0.0342517
BnaA01g16830D	235.331	3.12099	0.44883	6.9491	3.67617e-12	7.06566e-11
BnaA01g17010D	66.3052	-2.73726	0.537338	-5.08489	3.67848e-07	3.35007e-06
BnaA01g17020D	177.226	-3.93348	0.571988	-6.86198	6.79149e-12	1.25943e-10
BnaA01g17040D	83.2455	-2.08013	0.517033	-4.02075	5.80134e-05	0.00034615
BnaA01g17050D	348.378	-2.22402	0.377325	-5.89319	3.78816e-09	4.73822e-08
BnaA01g17150D	209.311	-4.47879	0.445869	-10.0109	1.36471e-23	8.72543e-22
BnaA01g17170D	733.41	-8.4616	0.625476	-13.0127	1.03622e-38	2.05926e-36
BnaA01g17280D	4.5375	-4.32202	1.75125	-2.4532	0.0141591	0.0424173
BnaA01g17480D	14.5204	5.11507	1.30949	3.45539	0.00054949	0.00260136
BnaA01g17520D	18.867	6.63733	1.43955	4.60894	4.04728e-06	3.05837e-05
BnaA01g17620D	318.369	8.3971	0.795816	9.62278	6.40748e-22	3.54e-20
BnaA01g17830D	15.4378	4.47662	1.16706	3.6234	0.00029075	0.00148055
BnaA01g18000D	8.37564	-5.30339	1.60385	-3.29872	0.000971256	0.00429707
BnaA01g18050D	351.789	4.70339	0.470553	9.97426	1.97578e-23	1.24678e-21
BnaA01g18130D	146.629	-2.11387	0.417614	-5.05996	4.1934e-07	3.77002e-06
BnaA01g18180D	181.652	-2.31511	0.438374	-5.2793	1.29681e-07	1.26845e-06
BnaA01g18270D	12.6373	4.16575	1.21581	3.25786	0.00112256	0.00488382
BnaA01g18400D	21.4424	-3.48272	0.959571	-3.58108	0.000342182	0.00170623
BnaA01g18440D	48.0302	-4.9955	0.796476	-6.08934	1.13376e-09	1.531e-08
BnaA01g18450D	1033.25	-4.74731	0.44899	-10.5654	4.31284e-26	3.37294e-24
BnaA01g18670D	201.376	-3.39789	0.423616	-8.01219	1.12685e-15	3.25284e-14
BnaA01g18680D	168.503	-3.46891	0.66217	-5.23176	1.67906e-07	1.613e-06
BnaA01g18740D	86.3822	3.82545	0.603492	6.31327	2.73207e-10	4.01954e-09
BnaA01g18910D	17.0109	-5.18495	1.32939	-3.49872	0.00046749	0.00225505
BnaA01g18980D	11.5314	5.91904	1.50566	3.92801	8.56509e-05	0.000493262
BnaA01g19110D	1191.66	-2.62601	0.337482	-7.78061	7.21756e-15	1.90297e-13
BnaA01g19120D	143.293	-2.53908	0.511994	-4.95611	7.19199e-07	6.22927e-06
BnaA01g19130D	30.1654	2.8759	0.731024	3.91641	8.9877e-05	0.000514539
BnaA01g19360D	9974.34	11.4578	1.62534	6.93265	4.13038e-12	7.88459e-11
BnaA01g19430D	386.478	8.6673	0.793384	9.93569	2.91157e-23	1.79893e-21
BnaA01g19440D	18.1079	3.58168	0.954335	3.68779	0.000226214	0.00118151
BnaA01g19460D	136.684	-6.06894	0.672903	-8.78126	1.61654e-18	6.33519e-17
BnaA01g19470D	17.8227	-3.24136	0.943941	-3.38966	0.000699798	0.00322048
BnaA01g19480D	16.637	-6.37138	1.46671	-4.34125	1.41673e-05	9.62912e-05
BnaA01g19490D	19.0527	2.11533	0.856714	2.46221	0.0138085	0.0416041
BnaA01g19500D	267.119	-3.76201	0.452235	-8.30909	9.64409e-17	3.11861e-15
BnaA01g19510D	269.334	6.27647	0.560781	11.0349	2.59289e-28	2.47482e-26
BnaA01g19660D	75.0479	6.34111	0.866607	6.85074	7.34683e-12	1.35533e-10
BnaA01g19670D	36.2823	5.6964	1.0802	4.88051	1.05811e-06	8.9027e-06
BnaA01g19680D	45.6906	-2.46003	0.613259	-4.00358	6.23909e-05	0.000369783
BnaA01g19710D	151.185	-2.20874	0.414604	-5.32518	1.00851e-07	1.00547e-06
BnaA01g19790D	506.31	2.02203	0.39142	5.16547	2.39835e-07	2.2516e-06
BnaA01g19830D	7.4112	-5.0595	1.65717	-3.04213	0.00234912	0.00924971
BnaA01g19850D	472.038	2.1548	0.358271	6.01382	1.81201e-09	2.3729e-08
BnaA01g20250D	14.6898	3.87841	1.14027	3.30103	0.0009633	0.00426612
BnaA01g20370D	385.211	-2.5221	0.41789	-6.03408	1.59875e-09	2.1118e-08
BnaA01g20410D	5.34128	-4.66217	1.66747	-2.78709	0.00531842	0.018607
BnaA01g20440D	11.6349	-2.71562	1.12263	-2.39501	0.0166197	0.048495
BnaA01g20450D	122.258	3.5629	0.475155	7.48194	7.32316e-14	1.71364e-12
BnaA01g20460D	89.4833	-4.46959	0.618014	-7.17209	7.38609e-13	1.5475e-11
BnaA01g20570D	114.587	9.10518	1.33486	6.82063	9.06398e-12	1.64477e-10
BnaA01g20710D	507.06	-4.94862	0.452905	-10.9053	1.08755e-27	9.81722e-26
BnaA01g20790D	272.822	-6.24153	0.524174	-11.7317	8.77213e-32	1.08398e-29
BnaA01g20830D	11.9255	-5.90526	1.50082	-3.93145	8.44355e-05	0.000487052
BnaA01g20880D	155.408	5.17974	0.55624	9.22976	2.71249e-20	1.26391e-18
BnaA01g21180D	333.271	-2.51979	0.374305	-6.7302	1.69427e-11	2.96436e-10
BnaA01g21220D	138.633	-3.05763	0.435516	-7.01238	2.3429e-12	4.60275e-11
BnaA01g21390D	35.1575	2.83144	0.684553	4.12106	3.77128e-05	0.000234506
BnaA01g21430D	210.323	7.81029	0.809873	8.85817	8.13378e-19	3.30937e-17
BnaA01g21470D	8.94971	3.13438	1.24236	2.46819	0.0135799	0.0410379
BnaA01g21490D	6.5378	-4.98343	1.61889	-3.07129	0.00213133	0.00850855
BnaA01g21510D	9.54649	-3.15876	1.19394	-2.58684	0.00968615	0.0308482
BnaA01g21600D	138.778	-8.23896	1.08898	-6.15594	7.46325e-10	1.03458e-08
BnaA01g21610D	574.801	-8.81445	0.733428	-11.1811	5.04405e-29	5.10724e-27
BnaA01g21620D	216.916	-3.77317	0.522935	-7.20466	5.81881e-13	1.23566e-11
BnaA01g21850D	34.4197	-2.16365	0.658003	-3.28227	0.00102974	0.00451976
BnaA01g22100D	7.5295	5.19824	1.62288	3.19536	0.00139656	0.00590453
BnaA01g22130D	345.006	-2.22043	0.367111	-6.04737	1.47226e-09	1.95198e-08
BnaA01g22240D	84.7733	-2.82356	0.569031	-4.95469	7.24451e-07	6.27171e-06
BnaA01g22280D	5.8335	4.86273	1.64653	2.94535	0.00322594	0.0121455
BnaA01g22330D	31.5133	7.30115	1.42411	5.12461	2.9816e-07	2.75881e-06
BnaA01g22460D	210.642	-2.04466	0.527153	-3.8779	0.000105364	0.000594296
BnaA01g22570D	22.9314	2.21365	0.806571	2.73721	0.00619627	0.021153
BnaA01g22580D	40.8314	2.59383	0.634431	4.07884	4.52611e-05	0.000277076
BnaA01g22670D	565.344	-2.03955	0.347915	-5.86177	4.57963e-09	5.6499e-08
BnaA01g22690D	36.5527	-4.56898	0.832272	-5.35157	8.71935e-08	8.79739e-07
BnaA01g22700D	1013.08	-3.19966	0.411993	-7.76511	8.1572e-15	2.13801e-13
BnaA01g22720D	107.426	7.30066	0.944814	6.90314	5.0866e-12	9.61346e-11
BnaA01g22790D	32.6754	7.41995	1.38564	5.35397	8.60466e-08	8.69099e-07
BnaA01g22900D	249.861	-3.86784	0.41566	-9.29164	1.51931e-20	7.26282e-19
BnaA01g23040D	7.021	-3.88912	1.47872	-2.45777	0.0139802	0.041988
BnaA01g23130D	157.118	5.39755	0.547038	9.7569	1.72341e-22	9.95519e-21
BnaA01g23420D	138.717	-3.02492	0.467245	-6.46655	1.00267e-10	1.56463e-09
BnaA01g23490D	47.3538	-7.85535	1.36782	-5.74215	9.34824e-09	1.10443e-07
BnaA01g23510D	5413.75	2.55858	0.380957	6.71609	1.8667e-11	3.24897e-10
BnaA01g23520D	49.2911	5.09854	0.793438	6.23532	4.50851e-10	6.44614e-09
BnaA01g23650D	12.0879	-5.81661	1.56029	-3.72095	0.000198473	0.00105221
BnaA01g23690D	44.8398	-7.78973	1.36592	-5.70221	1.18267e-08	1.37498e-07
BnaA01g23790D	24.0629	2.88115	0.797512	3.59196	0.000328202	0.00164776
BnaA01g23810D	17.3534	-5.15795	1.4131	-3.30496	0.000949888	0.00421409
BnaA01g23890D	75.7022	-3.15082	0.559476	-5.61783	1.93369e-08	2.17179e-07
BnaA01g23920D	43.1616	-2.60164	0.633418	-4.09748	4.17665e-05	0.000257161
BnaA01g24020D	110.327	5.65641	0.639509	8.65467	4.94326e-18	1.83978e-16
BnaA01g24090D	21.6374	-5.62179	1.27058	-3.90406	9.45919e-05	0.000539098
BnaA01g24190D	163.911	-3.29663	0.55751	-5.90591	3.50704e-09	4.41564e-08
BnaA01g24290D	24.1309	4.31708	0.936124	4.48003	7.46328e-06	5.35986e-05
BnaA01g24360D	1137.69	-6.13281	0.522111	-11.7181	1.02921e-31	1.26593e-29
BnaA01g24750D	135.793	-5.2567	0.641705	-8.09925	5.52993e-16	1.65417e-14
BnaA01g24780D	20.5283	-6.52582	1.52292	-4.27802	1.88563e-05	0.000124971
BnaA01g24850D	12.0209	-4.68241	1.38188	-3.08805	0.00201478	0.00812118
BnaA01g24860D	210.575	5.63804	0.534422	10.444	1.56059e-25	1.16735e-23
BnaA01g24880D	22.0352	4.51248	1.0357	4.19025	2.78646e-05	0.000178178
BnaA01g24910D	2795.87	13.2104	1.2527	9.97327	1.99554e-23	1.25627e-21
BnaA01g24950D	54.7285	3.8159	0.64672	5.86008	4.62655e-09	5.70515e-08
BnaA01g24980D	139.709	-9.2802	1.34031	-6.92326	4.41355e-12	8.40405e-11
BnaA01g25020D	26.64	-2.68132	0.831512	-3.21121	0.00132178	0.00562587
BnaA01g25080D	6.21148	4.9559	1.63403	3.02562	0.00248128	0.00969982
BnaA01g25090D	16.7926	4.09164	1.10054	3.59726	0.000321593	0.00161849
BnaA01g25410D	46.8747	4.21005	0.765237	5.43567	5.45905e-08	5.69192e-07
BnaA01g25470D	35.36	7.51435	1.38748	5.41484	6.13452e-08	6.33913e-07
BnaA01g25480D	11.0466	5.8281	1.53081	3.80237	0.000143316	0.000785438
BnaA01g25510D	13.9771	-2.79798	1.0009	-2.76879	0.00562647	0.0194749
BnaA01g25640D	150.914	-6.92494	0.76775	-8.53108	1.44981e-17	5.11701e-16
BnaA01g25960D	120.117	5.77523	0.639278	8.836	9.92061e-19	3.99669e-17
BnaA01g26000D	7.01176	-5.09128	1.60434	-3.1669	0.00154073	0.00643186
BnaA01g26060D	9.70698	-4.4693	1.39553	-2.92864	0.00340452	0.0127207
BnaA01g26110D	16.9998	-4.57279	1.13111	-3.80514	0.000141725	0.000777414
BnaA01g26170D	34.4633	3.74891	0.780082	4.75596	1.97509e-06	1.58325e-05
BnaA01g26250D	37.1999	3.86769	0.742056	5.15465	2.541e-07	2.37465e-06
BnaA01g26320D	830.158	-10.6516	1.03093	-7.9693	1.59572e-15	4.53261e-14
BnaA01g26430D	247.152	-2.64859	0.518111	-5.11006	3.22058e-07	2.96192e-06
BnaA01g26480D	893.691	-10.768	1.01994	-8.10008	5.49241e-16	1.6443e-14
BnaA01g26640D	26.9831	-7.06661	1.41317	-4.99887	5.76665e-07	5.0773e-06
BnaA01g26660D	70.1408	4.82166	1.99105	2.83203	0.0046254	0.0164977
BnaA01g26680D	15.9113	6.39716	1.45792	4.38568	1.15625e-05	7.98503e-05
BnaA01g26700D	34.5667	-4.0446	0.783117	-5.08506	3.6751e-07	3.34757e-06
BnaA01g26720D	2696.41	2.15745	0.359437	6.00221	1.94654e-09	2.54219e-08
BnaA01g26790D	190.554	6.82189	0.667246	9.85454	6.55153e-23	3.96059e-21
BnaA01g26920D	17.199	2.64674	0.897267	2.93156	0.0033726	0.0126192
BnaA01g27010D	59.0206	2.13535	0.568655	3.75173	0.000175616	0.000941718
BnaA01g27180D	5.32974	4.67468	1.68967	2.75661	0.00584047	0.020102
BnaA01g27340D	6.06383	-4.86518	1.63603	-2.96616	0.0030154	0.0114835
BnaA01g27540D	61.8788	-2.07943	0.535261	-3.88145	0.000103835	0.000586317
BnaA01g27770D	132.432	-3.21369	0.456696	-7.02655	2.11697e-12	4.18203e-11
BnaA01g27800D	758.974	-2.1953	0.405011	-5.41994	5.9618e-08	6.17079e-07
BnaA01g27830D	529.728	7.60765	0.568472	13.0671	5.0781e-39	1.03083e-36
BnaA01g27840D	23.8961	6.9824	1.41136	4.94599	7.57592e-07	6.53313e-06
BnaA01g27890D	32.9344	-2.52469	0.7713	-3.26423	0.00109764	0.00478506
BnaA01g28000D	33.0281	-4.66379	1.01489	-4.46047	8.17797e-06	5.8182e-05
BnaA01g28070D	156.689	-4.99601	0.565552	-8.76608	1.84991e-18	7.20208e-17
BnaA01g28080D	62.1785	3.62864	0.627282	5.75712	8.55625e-09	1.01582e-07
BnaA01g28100D	7.88783	5.33947	1.57713	3.3802	0.000724341	0.0033208
BnaA01g28110D	31.7314	2.02561	0.674577	2.99835	0.00271449	0.0104692
BnaA01g28310D	45.3617	-2.61165	0.619468	-4.20629	2.59597e-05	0.000167141
BnaA01g28380D	113.912	4.62815	0.579845	7.92543	2.27361e-15	6.34313e-14
BnaA01g28440D	20.0773	4.88486	1.11772	4.09213	4.27422e-05	0.000262773
BnaA01g28480D	566.471	10.1994	1.03837	7.51905	5.51754e-14	1.30836e-12
BnaA01g28570D	63.4223	-8.20805	1.37621	-5.96282	2.47917e-09	3.19396e-08
BnaA01g28660D	40.9867	-2.16638	0.668434	-3.23642	0.00121039	0.00521047
BnaA01g28710D	453.884	2.27614	0.382469	5.95046	2.67397e-09	3.43246e-08
BnaA01g28740D	18.7874	3.15929	0.906787	3.44819	0.000564353	0.00266226
BnaA01g28810D	23.924	-2.75332	0.89363	-3.06562	0.0021722	0.00865288
BnaA01g28890D	17416.6	10.6126	0.373655	28.2107	4.32141e-175	2.30154e-170
BnaA01g28930D	291.387	-9.19282	1.07858	-6.80838	9.87063e-12	1.78177e-10
BnaA01g28990D	68.1733	-2.12102	0.693806	-3.05495	0.00225101	0.0089155
BnaA01g29000D	137.34	-2.6101	0.511581	-5.09853	3.423e-07	3.13617e-06
BnaA01g29030D	64.307	3.96324	0.621711	6.33189	2.42181e-10	3.58088e-09
BnaA01g29070D	80.3401	2.69622	0.54539	4.93735	7.91923e-07	6.80714e-06
BnaA01g29130D	190.015	-2.40864	0.590472	-4.07775	4.54736e-05	0.000278217
BnaA01g29140D	247.274	-2.51219	0.39387	-6.37597	1.81805e-10	2.73292e-09
BnaA01g29300D	164.308	-3.13315	0.428409	-7.30558	2.76077e-13	6.05583e-12
BnaA01g29370D	8.48008	-5.39028	1.56172	-3.44652	0.000567858	0.00267595
BnaA01g29380D	213.778	7.49928	0.741008	9.51106	1.88724e-21	1.00312e-19
BnaA01g29520D	64.915	-2.5527	0.636362	-4.00596	6.17651e-05	0.00036636
BnaA01g29540D	12.4227	-5.96399	1.49554	-3.98474	6.7554e-05	0.000397334
BnaA01g29790D	172.029	5.53166	0.542167	10.0854	6.40753e-24	4.24451e-22
BnaA01g29830D	4284.72	-4.25447	0.32604	-13.0475	6.56427e-39	1.31431e-36
BnaA01g29840D	276.576	3.74207	0.605354	6.17557	6.59264e-10	9.21084e-09
BnaA01g30070D	15.3336	3.5798	1.09263	3.2108	0.00132367	0.00563213
BnaA01g30290D	23.4212	-2.99113	0.884313	-3.35984	0.000779878	0.00354399
BnaA01g30340D	246.618	-3.62129	0.419413	-8.62412	6.45883e-18	2.37727e-16
BnaA01g30360D	90.5688	-2.75299	0.54497	-5.04534	4.52716e-07	4.04686e-06
BnaA01g30370D	157.19	-2.4021	0.449051	-5.34682	8.95107e-08	9.0016e-07
BnaA01g30380D	53.1158	-2.53267	0.588268	-4.29755	1.72698e-05	0.000115289
BnaA01g30420D	376.451	8.63432	0.78973	9.94172	2.74058e-23	1.69919e-21
BnaA01g30450D	262.152	-2.04919	0.41633	-4.9212	8.60163e-07	7.34981e-06
BnaA01g30490D	832.934	-4.31486	0.433375	-9.95021	2.51647e-23	1.56938e-21
BnaA01g30530D	101.362	-2.504	0.46679	-5.35969	8.33653e-08	8.44258e-07
BnaA01g30600D	4.59551	-4.417	1.70799	-2.57536	0.0100135	0.0317331
BnaA01g30610D	5.03467	-4.52606	1.70577	-2.64173	0.00824841	0.0269958
BnaA01g30690D	4.10994	-4.23441	1.73837	-2.42372	0.0153624	0.0454171
BnaA01g30700D	5.09269	-4.58556	1.67967	-2.72065	0.00651537	0.0220838
BnaA01g30920D	15.6162	-2.26847	0.922077	-2.4486	0.0143413	0.0428862
BnaA01g31040D	133.035	4.71007	0.549438	8.51661	1.64285e-17	5.75257e-16
BnaA01g31080D	6.00581	-4.82058	1.65553	-2.90265	0.00370015	0.0136491
BnaA01g31120D	90.5191	-3.04708	0.532689	-5.70989	1.13052e-08	1.31838e-07
BnaA01g31130D	618.182	-2.00167	0.403654	-4.95855	7.10224e-07	6.15455e-06
BnaA01g31160D	21.6448	-3.33861	0.872521	-3.78125	0.000156042	0.000847593
BnaA01g31180D	72.9468	-2.10387	0.532014	-3.95146	7.76756e-05	0.000451235
BnaA01g31190D	19.2058	-2.04654	0.848588	-2.40501	0.016172	0.0473895
BnaA01g31200D	63.8138	3.76672	0.612232	6.11874	9.4317e-10	1.28636e-08
BnaA01g31250D	51.7986	3.83783	0.710409	5.36327	8.17273e-08	8.28615e-07
BnaA01g31280D	79.5392	3.58795	0.586351	6.09774	1.07577e-09	1.45935e-08
BnaA01g31320D	69.7295	-3.13659	0.55426	-5.64382	1.66321e-08	1.8819e-07
BnaA01g31370D	340.597	-6.33578	0.583546	-10.7312	7.26254e-27	6.02486e-25
BnaA01g31390D	125.941	-4.21346	0.604872	-6.93634	4.02402e-12	7.70088e-11
BnaA01g31470D	2271.09	2.21248	0.307861	7.18647	6.6489e-13	1.40243e-11
BnaA01g31620D	637.743	-6.41005	0.627119	-10.1625	2.91368e-24	1.98948e-22
BnaA01g31630D	75.5345	-4.79387	0.753831	-6.27433	3.51148e-10	5.09169e-09
BnaA01g31710D	8.95404	-5.47248	1.55181	-3.52179	0.000428642	0.00208866
BnaA01g31720D	29.7541	-7.1439	1.43685	-4.96904	6.72847e-07	5.84891e-06
BnaA01g31770D	5.90807	-4.7568	1.67884	-2.82273	0.00476174	0.016907
BnaA01g31830D	269.793	-3.088	0.478694	-6.44707	1.14031e-10	1.76906e-09
BnaA01g31910D	105.926	-3.35876	0.68831	-4.87032	1.1142e-06	9.32891e-06
BnaA01g31940D	8.98886	-5.47992	1.54993	-3.531	0.00041399	0.00202356
BnaA01g32200D	34.8587	-2.33231	0.713898	-3.25994	0.00111434	0.00485073
BnaA01g32220D	7.48573	-5.19033	1.5919	-3.2543	0.00113674	0.00493813
BnaA01g32270D	386.382	9.695	1.04189	7.18199	6.87047e-13	1.44573e-11
BnaA01g32280D	258.787	-2.01355	0.381317	-5.27956	1.29498e-07	1.26689e-06
BnaA01g32300D	69.5828	-2.85883	0.549974	-5.18796	2.12608e-07	2.01232e-06
BnaA01g32320D	3133.5	-2.10367	0.342678	-6.13882	8.3139e-10	1.1418e-08
BnaA01g32460D	55.8721	2.1329	0.645211	3.30284	0.000957112	0.00424189
BnaA01g32480D	4.62225	4.48403	1.70672	2.61688	0.0088738	0.0286691
BnaA01g32490D	30.7922	4.39676	0.856562	5.01066	5.42443e-07	4.79502e-06
BnaA01g32580D	1019.8	-9.93524	0.797687	-11.2096	3.65874e-29	3.74733e-27
BnaA01g32620D	75.5474	5.101	0.672221	7.44687	9.55833e-14	2.21333e-12
BnaA01g32740D	510.274	-3.43534	0.368177	-9.32673	1.09183e-20	5.31532e-19
BnaA01g32850D	11.3375	5.89399	1.50933	3.90157	9.55706e-05	0.000544176
BnaA01g32930D	3199.14	9.70714	0.520301	18.274	1.33421e-74	1.82202e-71
BnaA01g33150D	99.4453	2.00763	0.489403	4.10047	4.12309e-05	0.000254186
BnaA01g33160D	24.2514	5.85087	1.23098	4.09498	4.22199e-05	0.000259653
BnaA01g33240D	14.9811	6.30975	1.46523	4.30402	1.67724e-05	0.00011225
BnaA01g33260D	19.7648	5.55652	1.25792	3.84452	0.00012079	0.000672995
BnaA01g33270D	148.963	-9.37587	1.33371	-7.02942	2.07392e-12	4.10309e-11
BnaA01g33290D	286.959	4.68146	0.418958	11.1432	7.73194e-29	7.69711e-27
BnaA01g33330D	6.51459	-4.9699	1.62451	-3.0519	0.00227397	0.00899506
BnaA01g33370D	70.767	4.21085	0.648444	6.4436	1.16671e-10	1.80633e-09
BnaA01g33430D	288.748	-2.15128	0.438165	-4.90884	9.16154e-07	7.79075e-06
BnaA01g33470D	15.9775	3.6665	1.08095	3.31953	0.000901703	0.00403019
BnaA01g33490D	306.596	2.65263	0.359145	7.38376	1.5388e-13	3.47857e-12
BnaA01g33740D	8.90302	3.13952	1.21193	2.53313	0.0113048	0.0351477
BnaA01g33760D	14.391	4.38984	1.1635	3.56665	0.000361576	0.0017932
BnaA01g33820D	181.352	3.01322	0.43547	6.91408	4.70909e-12	8.93481e-11
BnaA01g33880D	1474.12	4.37225	1.51672	2.89496	0.00379207	0.0139332
BnaA01g33910D	219.778	-3.79495	0.472499	-8.01967	1.0603e-15	3.0724e-14
BnaA01g33920D	137.147	-4.1923	0.508991	-8.20367	2.33159e-16	7.24915e-15
BnaA01g33960D	44.5898	2.66835	0.617292	4.31257	1.61371e-05	0.000108352
BnaA01g34000D	8.42188	3.56584	1.2874	2.66101	0.00779067	0.0257125
BnaA01g34010D	277.817	-2.08662	0.451391	-4.62185	3.80326e-06	2.88626e-05
BnaA01g34060D	130.877	-2.25249	0.580429	-3.87889	0.000104935	0.000592091
BnaA01g34350D	13.6241	-6.01298	1.53277	-3.91705	8.96407e-05	0.000513462
BnaA01g34390D	200.551	4.97944	0.503375	9.83845	7.68891e-23	4.61539e-21
BnaA01g34430D	49.3983	4.14766	0.686744	5.97329	2.32516e-09	3.00354e-08
BnaA02g00010D	368.135	10.6178	1.32344	8.0224	1.03702e-15	3.01149e-14
BnaA02g00120D	173.689	-2.11265	0.424486	-4.97551	6.50771e-07	5.66794e-06
BnaA02g00180D	51.458	-3.77383	0.651595	-5.74804	9.02861e-09	1.06857e-07
BnaA02g00210D	322.861	-2.00223	0.360267	-5.55683	2.74724e-08	3.01246e-07
BnaA02g00340D	16.2095	-6.30135	1.48837	-4.22995	2.3374e-05	0.000151963
BnaA02g00390D	101.178	2.55935	0.488504	5.23473	1.65228e-07	1.589e-06
BnaA02g00410D	53.2394	-3.82558	0.818663	-4.63912	3.49898e-06	2.67517e-05
BnaA02g00450D	429.279	-2.00331	0.367475	-5.45099	5.00892e-08	5.25448e-07
BnaA02g00520D	53.6539	-5.08538	0.874158	-5.66209	1.49536e-08	1.70685e-07
BnaA02g00610D	91.7667	-6.91584	1.01401	-6.18967	6.02899e-10	8.47224e-09
BnaA02g00670D	4463.19	-7.48624	0.991046	-7.54253	4.60955e-14	1.10139e-12
BnaA02g00710D	199.309	-2.88049	0.506375	-5.68491	1.3088e-08	1.50943e-07
BnaA02g00730D	15.7615	3.08624	0.979336	3.11598	0.00183334	0.00748126
BnaA02g00830D	181.509	-3.23166	0.411295	-7.84884	4.19891e-15	1.13633e-13
BnaA02g00840D	42.315	3.01907	0.684277	4.39609	1.10218e-05	7.64632e-05
BnaA02g00860D	26.8357	3.20621	0.786528	4.04589	5.21237e-05	0.000314353
BnaA02g00920D	150.896	-3.48023	0.506202	-6.86392	6.69971e-12	1.24492e-10
BnaA02g01000D	237.686	4.23866	0.573607	7.37504	1.64299e-13	3.70465e-12
BnaA02g01040D	195.577	-3.13667	0.450906	-6.95018	3.64824e-12	7.01958e-11
BnaA02g01110D	9.98358	-3.27602	1.18028	-2.70659	0.00679782	0.0228766
BnaA02g01150D	253.719	-2.17251	0.417862	-5.19799	2.01458e-07	1.91324e-06
BnaA02g01160D	75.8485	-8.48375	1.35061	-6.28076	3.36918e-10	4.90539e-09
BnaA02g01290D	23.5899	3.47586	0.917402	3.74664	0.000179217	0.000958708
BnaA02g01340D	1131.14	-2.62145	0.389728	-6.72582	1.7461e-11	3.05203e-10
BnaA02g01440D	172.46	-2.18301	0.425002	-5.13482	2.82409e-07	2.62172e-06
BnaA02g01450D	1508.22	-10.1096	0.774066	-12.0976	1.08777e-33	1.54078e-31
BnaA02g01460D	142.459	-3.6235	0.596966	-6.05828	1.37583e-09	1.83143e-08
BnaA02g01470D	99.2376	-2.50957	0.49313	-5.0847	3.6821e-07	3.3528e-06
BnaA02g01560D	8.83801	-5.3614	1.60699	-3.3277	0.000875675	0.00392804
BnaA02g01570D	4.76287	-4.35486	1.76202	-2.45498	0.0140892	0.0422318
BnaA02g01630D	1842.48	-2.50195	0.349435	-7.15968	8.08665e-13	1.68434e-11
BnaA02g01730D	136.484	-2.53913	0.607505	-4.17673	2.95724e-05	0.000187857
BnaA02g01740D	43.6834	3.82937	0.688681	5.51075	3.57302e-08	3.8428e-07
BnaA02g01770D	658.516	-2.34192	0.361161	-6.48375	8.94717e-11	1.40441e-09
BnaA02g01830D	14.6409	2.37904	0.929644	2.54572	0.0109054	0.0341071
BnaA02g01870D	901.922	-3.40764	0.425723	-8.00253	1.21889e-15	3.51092e-14
BnaA02g01880D	309.536	-5.40277	0.443052	-12.1261	7.68302e-34	1.09702e-31
BnaA02g01890D	131.932	-2.30707	0.433714	-5.31656	1.0575e-07	1.0496e-06
BnaA02g01910D	409.66	-2.60613	0.350115	-7.442	9.91698e-14	2.29339e-12
BnaA02g01950D	51.6865	5.16403	0.789061	6.34766	2.18613e-10	3.25045e-09
BnaA02g01990D	17.1434	-5.25138	1.29096	-3.6249	0.000289076	0.00147289
BnaA02g02020D	42.3824	-2.09498	0.621635	-3.36564	0.000763675	0.00348075
BnaA02g02030D	210.565	4.13323	0.469577	8.78317	1.58927e-18	6.2421e-17
BnaA02g02110D	52.6215	5.83113	0.902786	6.09024	1.12744e-09	1.52462e-08
BnaA02g02310D	954.872	-8.10084	1.3848	-5.74249	9.32948e-09	1.10246e-07
BnaA02g02370D	83.3393	-3.25772	0.529202	-6.14024	8.23952e-10	1.13188e-08
BnaA02g02400D	80.6285	-2.46979	0.500362	-4.9308	8.18941e-07	7.02237e-06
BnaA02g02420D	89.0999	3.15084	0.513294	6.12648	8.98467e-10	1.23011e-08
BnaA02g02430D	511.027	9.02701	0.816804	10.0509	9.09939e-24	5.93902e-22
BnaA02g02490D	90.2666	-8.69372	1.35584	-6.41111	1.44461e-10	2.20771e-09
BnaA02g02520D	16.6496	-4.43736	1.30557	-3.22778	0.00124756	0.00534889
BnaA02g02570D	271.011	-3.45964	0.542658	-6.36994	1.89103e-10	2.83543e-09
BnaA02g02690D	643.875	-2.63893	0.377026	-6.99839	2.5892e-12	5.07166e-11
BnaA02g02820D	86.4387	-2.01875	0.480453	-4.19942	2.67599e-05	0.000171732
BnaA02g02830D	14.3931	-6.13601	1.5009	-4.08407	4.42532e-05	0.000271405
BnaA02g02840D	72.881	-3.48791	0.588087	-5.90925	3.43665e-09	4.33623e-08
BnaA02g02870D	13.6421	3.41706	1.12625	2.97625	0.00291801	0.0111549
BnaA02g02880D	992.084	-2.17965	0.411316	-5.29894	1.16476e-07	1.14729e-06
BnaA02g02900D	156.294	9.51115	1.32977	7.15206	8.54844e-13	1.77152e-11
BnaA02g02910D	5296.62	3.07728	0.373228	8.24486	1.6536e-16	5.22976e-15
BnaA02g02930D	498.438	-4.32689	0.6133	-7.04782	1.81738e-12	3.62516e-11
BnaA02g02970D	792.851	-11.5509	1.29201	-8.77627	1.68983e-18	6.60782e-17
BnaA02g03070D	596.386	-3.75929	0.337078	-11.1468	7.41915e-29	7.42738e-27
BnaA02g03090D	12.1867	-2.89911	1.18296	-2.41908	0.0155599	0.0458862
BnaA02g03130D	43.1648	-3.20816	0.68283	-4.67535	2.93454e-06	2.27796e-05
BnaA02g03140D	15613.4	-7.12077	0.549786	-12.9473	2.43496e-38	4.73298e-36
BnaA02g03200D	91.6696	-2.38161	0.519042	-4.58481	4.54401e-06	3.3981e-05
BnaA02g03340D	292.779	7.90234	0.777867	9.55168	1.27606e-21	6.8857e-20
BnaA02g03360D	628.854	-2.32175	0.457485	-5.07448	3.88554e-07	3.52178e-06
BnaA02g03490D	186.679	-2.64909	0.435097	-6.08541	1.16197e-09	1.56592e-08
BnaA02g03510D	51.3832	-2.48811	0.619172	-4.01134	6.03759e-05	0.000358799
BnaA02g03540D	1640.08	12.5308	1.27685	9.48042	2.53271e-21	1.32375e-19
BnaA02g03580D	207.142	3.25754	0.48884	6.65818	2.77243e-11	4.69795e-10
BnaA02g03610D	50.7155	-4.39305	0.830241	-5.21862	1.80265e-07	1.72396e-06
BnaA02g03630D	482.677	5.1384	0.542775	9.44602	3.51968e-21	1.80418e-19
BnaA02g03730D	31.3289	2.46579	0.701821	3.50407	0.000458197	0.00221585
BnaA02g03740D	11.6919	3.58004	1.13912	3.05547	0.00224707	0.00890319
BnaA02g03750D	119.808	-2.4481	0.507873	-4.81705	1.457e-06	1.19511e-05
BnaA02g03860D	308.221	-2.81123	0.390775	-7.19122	6.42152e-13	1.35662e-11
BnaA02g03870D	57.6492	-5.34981	1.59503	-3.25354	0.00113976	0.00494967
BnaA02g03880D	25.0798	-4.61798	1.03391	-4.29211	1.76979e-05	0.000117925
BnaA02g03890D	26.462	-4.63704	1.09975	-4.06274	4.85002e-05	0.000294972
BnaA02g03900D	45.2571	-4.76114	0.961263	-4.843	1.27891e-06	1.0603e-05
BnaA02g03920D	29.1712	-4.79495	1.11406	-4.13812	3.50157e-05	0.000219065
BnaA02g03940D	43.6982	-6.34649	1.82754	-3.42396	0.000617159	0.00288125
BnaA02g03980D	67.2243	-3.60625	0.939727	-3.82268	0.000132007	0.000729226
BnaA02g04010D	581.705	-2.15061	0.389856	-5.51591	3.46972e-08	3.73699e-07
BnaA02g04020D	20.5251	2.35775	0.822629	2.85594	0.00429093	0.0154863
BnaA02g04040D	191.57	-6.7332	0.695722	-9.34815	8.91974e-21	4.39054e-19
BnaA02g04170D	821.927	-6.93319	0.46558	-14.7747	2.13278e-49	7.88818e-47
BnaA02g04350D	54.2801	3.11713	0.631033	4.92423	8.46912e-07	7.24473e-06
BnaA02g04380D	9.69507	-3.60558	1.31251	-2.64839	0.00808764	0.0265397
BnaA02g04440D	259.503	-2.49503	0.387869	-6.43066	1.27053e-10	1.95683e-09
BnaA02g04510D	7.9829	-5.29465	1.57556	-3.35498	0.0007937	0.00359973
BnaA02g04610D	33.8514	-4.22918	0.827081	-5.0161	5.27305e-07	4.67051e-06
BnaA02g04620D	24.094	4.30313	0.945517	4.4237	9.70232e-06	6.80363e-05
BnaA02g04730D	111.632	4.11596	0.557955	7.34556	2.04906e-13	4.56616e-12
BnaA02g04750D	75.4849	2.09868	0.514718	4.07465	4.60836e-05	0.000281722
BnaA02g04760D	1498.94	-10.8948	0.871958	-10.5765	3.82984e-26	3.0129e-24
BnaA02g04800D	951.026	-2.50789	0.427006	-5.87269	4.28782e-09	5.31824e-08
BnaA02g04820D	16.8304	3.73751	1.08123	3.38157	0.000720716	0.00330645
BnaA02g04830D	12.535	3.68642	1.12368	3.18529	0.00144611	0.00607974
BnaA02g04890D	203.606	-2.12246	0.471949	-4.49596	6.92561e-06	5.00545e-05
BnaA02g04960D	718.959	2.82694	0.352734	8.01319	1.11768e-15	3.22986e-14
BnaA02g05000D	143.22	2.50883	0.488997	5.12773	2.93258e-07	2.71676e-06
BnaA02g05010D	99.0087	-7.757	1.12122	-5.71979	1.06658e-08	1.24955e-07
BnaA02g05050D	5.54345	-4.70976	1.66534	-2.81896	0.00481796	0.0170873
BnaA02g05110D	432.479	3.98402	0.360628	11.0379	2.5088e-28	2.40631e-26
BnaA02g05170D	387.77	-6.75117	0.542542	-12.2482	1.71787e-34	2.5628e-32
BnaA02g05210D	231.347	2.93264	0.499448	5.86869	4.39256e-09	5.43549e-08
BnaA02g05220D	1374.77	-2.37444	0.317629	-7.47516	7.71128e-14	1.79972e-12
BnaA02g05230D	3731.87	-5.53889	0.344508	-16.0712	4.06126e-58	2.57499e-55
BnaA02g05240D	4255.45	-8.21509	0.423269	-19.3332	2.82283e-83	5.78236e-80
BnaA02g05330D	15.8161	2.33112	0.950857	2.44079	0.0146552	0.0436581
BnaA02g05340D	269.216	-2.30979	0.366927	-6.29337	3.10653e-10	4.53912e-09
BnaA02g05360D	341.875	-5.19756	0.535648	-9.66738	4.14872e-22	2.32586e-20
BnaA02g05400D	10.4592	3.37899	1.23005	2.68004	0.00736132	0.0245096
BnaA02g05410D	693.189	-4.64394	0.37687	-12.3094	8.06339e-35	1.2376e-32
BnaA02g05510D	261.618	-3.87077	0.495959	-7.79422	6.48088e-15	1.71553e-13
BnaA02g05540D	33.0637	-2.26478	0.706487	-3.19934	0.00137743	0.00583615
BnaA02g05560D	259.558	-2.41657	0.385905	-6.2603	3.84233e-10	5.54276e-09
BnaA02g05610D	42.0677	-2.55246	0.729326	-3.49254	0.000478442	0.00230205
BnaA02g05700D	77.2785	-8.49022	1.35965	-6.24341	4.28121e-10	6.14094e-09
BnaA02g05750D	14.5209	3.20049	1.08284	2.91499	0.00355698	0.0132107
BnaA02g05780D	8428.66	-6.59945	0.989453	-6.66947	2.56736e-11	4.37411e-10
BnaA02g05810D	4.10867	4.29129	1.73843	2.45662	0.014025	0.0420781
BnaA02g05820D	43.9743	7.82785	1.36718	5.72484	1.03531e-08	1.21694e-07
BnaA02g06130D	45.8193	2.0012	0.61645	3.24313	0.00118222	0.00510823
BnaA02g06160D	12.5599	-3.20915	1.11676	-2.82344	0.00475117	0.0168785
BnaA02g06180D	47.9108	-7.85299	1.3765	-5.70393	1.17076e-08	1.36233e-07
BnaA02g06230D	303.6	5.21207	0.496591	10.4517	1.43853e-25	1.08061e-23
BnaA02g06330D	37.4818	-7.54028	1.37849	-5.46907	4.5241e-08	4.77979e-07
BnaA02g06340D	31.0533	-7.28505	1.38897	-5.24394	1.57179e-07	1.51625e-06
BnaA02g06430D	64.4894	8.30833	1.36795	6.07255	1.25893e-09	1.68593e-08
BnaA02g06590D	9.03527	-5.47427	1.5566	-3.51183	0.000445027	0.00215902
BnaA02g06600D	13.6271	-2.59564	0.989877	-2.60096	0.00929641	0.029803
BnaA02g06620D	15.8628	6.39157	1.45917	4.37802	1.19762e-05	8.24297e-05
BnaA02g06740D	2663.7	7.56487	1.24021	6.09157	1.11809e-09	1.51259e-08
BnaA02g06800D	406.444	9.70361	1.07182	7.05491	1.72714e-12	3.45552e-11
BnaA02g06820D	156.444	8.46184	1.07948	6.23674	4.46796e-10	6.39675e-09
BnaA02g06860D	206.402	-3.44633	0.407829	-8.44044	3.16156e-17	1.07386e-15
BnaA02g06880D	240.556	-4.72236	0.44609	-10.5469	5.25001e-26	4.08787e-24
BnaA02g07080D	306.671	-2.00053	0.400911	-4.98926	6.06098e-07	5.31011e-06
BnaA02g07120D	1981.68	-3.95699	0.480287	-8.23749	1.75866e-16	5.54557e-15
BnaA02g07220D	7.51967	5.25591	1.59133	3.29708	0.000976962	0.00431873
BnaA02g07430D	6.11024	-4.86131	1.64287	-2.95093	0.00316818	0.0119537
BnaA02g07450D	340.994	10.4896	1.33621	7.84936	4.18179e-15	1.13227e-13
BnaA02g07460D	4.10994	-4.23441	1.73837	-2.42372	0.0153624	0.0454171
BnaA02g07630D	5.01146	-4.47008	1.73266	-2.56572	0.0102961	0.0325246
BnaA02g07740D	35.1321	-3.54364	0.912377	-3.85472	0.000115864	0.000648327
BnaA02g07750D	183.525	2.21255	0.458107	4.82834	1.37679e-06	1.1349e-05
BnaA02g07820D	6.08704	-4.86753	1.63701	-2.96576	0.00301933	0.0114919
BnaA02g07830D	60.8003	2.98897	0.606587	4.91562	8.85036e-07	7.54782e-06
BnaA02g07840D	482.775	-3.21395	0.512788	-6.26538	3.71925e-10	5.3748e-09
BnaA02g07880D	11.3935	-5.84021	1.50664	-3.87294	0.00010753	0.000605255
BnaA02g07900D	21.4352	-5.61823	1.26383	-3.91888	8.89616e-05	0.000510263
BnaA02g07920D	1082.24	-7.85825	0.511136	-15.1653	6.00628e-52	2.64371e-49
BnaA02g08070D	9.422	3.67864	1.31035	2.69864	0.00696226	0.0233445
BnaA02g08080D	384.816	10.6884	1.3178	8.11042	5.04468e-16	1.51622e-14
BnaA02g08140D	67.472	3.33113	0.571025	5.8149	6.06713e-09	7.37065e-08
BnaA02g08160D	1649.47	-2.03108	0.303976	-6.68154	2.3644e-11	4.04514e-10
BnaA02g08170D	696.553	-2.15782	0.413917	-5.2128	1.86009e-07	1.77379e-06
BnaA02g08190D	141.135	5.58163	0.585148	9.39504	5.7195e-21	2.86831e-19
BnaA02g08200D	66.1313	3.15711	0.626675	5.02485	5.03833e-07	4.476e-06
BnaA02g08250D	20.485	6.76269	1.4275	4.73582	2.18166e-06	1.73812e-05
BnaA02g08360D	9.42858	5.61505	1.54114	3.63925	0.000273436	0.00140082
BnaA02g08370D	6.47286	4.95091	1.66756	2.95752	0.00310124	0.0117449
BnaA02g08400D	32.7301	-2.9539	0.727192	-4.04215	5.29636e-05	0.000318986
BnaA02g08420D	155.867	6.53646	0.680099	9.28208	1.66205e-20	7.91056e-19
BnaA02g08480D	1168.1	-5.20459	0.347832	-14.9475	1.61764e-50	6.57664e-48
BnaA02g08540D	43.3744	3.57368	0.671169	5.28828	1.23473e-07	1.21172e-06
BnaA02g08560D	29.1814	-2.51758	0.725075	-3.46102	0.000538126	0.00255346
BnaA02g08740D	6.49694	3.88473	1.49668	2.40127	0.0163384	0.0477982
BnaA02g08880D	49.9065	4.16147	0.712471	5.77762	7.57638e-09	9.07785e-08
BnaA02g08960D	56.6833	7.03869	1.15895	5.04973	4.4243e-07	3.96156e-06
BnaA02g09120D	12.2864	4.13599	1.22493	3.21095	0.00132296	0.00562957
BnaA02g09130D	51.1084	5.11182	0.83755	5.93287	2.9769e-09	3.79753e-08
BnaA02g09320D	317.717	-4.62903	0.586866	-7.86977	3.55297e-15	9.70895e-14
BnaA02g09470D	11.0596	-3.04374	1.16046	-2.5788	0.00991446	0.0314606
BnaA02g09490D	16.332	3.70577	1.02622	3.53138	0.000413394	0.0020212
BnaA02g09520D	91.8209	-3.72943	0.539858	-6.88209	5.89822e-12	1.10455e-10
BnaA02g09590D	85.1031	-3.27623	0.713603	-4.5807	4.63416e-06	3.45818e-05
BnaA02g09640D	333.468	-3.09837	0.3961	-7.81852	5.34498e-15	1.42906e-13
BnaA02g09800D	210.287	-7.13421	0.713262	-9.54886	1.31131e-21	7.05447e-20
BnaA02g09820D	18.2963	-2.62548	0.946894	-2.75687	0.00583578	0.0200923
BnaA02g09840D	172.596	-3.61373	0.42973	-8.39488	4.66386e-17	1.55953e-15
BnaA02g09870D	718.057	-3.46285	0.347649	-9.95762	2.3358e-23	1.46012e-21
BnaA02g09890D	1182.13	-3.42222	0.39347	-8.69604	3.43666e-18	1.29995e-16
BnaA02g10070D	21.764	4.48583	1.04693	4.1238	3.7268e-05	0.000232012
BnaA02g10090D	84.8879	-5.75052	0.840849	-6.62551	3.46052e-11	5.79753e-10
BnaA02g10130D	42.4457	-3.55022	0.762571	-4.62363	3.77083e-06	2.86451e-05
BnaA02g10170D	12.0512	4.82295	1.34583	3.20444	0.00135326	0.00574603
BnaA02g10260D	17.9133	-3.49564	0.967739	-3.55085	0.000383992	0.00189362
BnaA02g10280D	278.194	2.94269	0.446043	6.59435	4.27119e-11	7.04489e-10
BnaA02g10360D	180.44	-3.97808	0.503638	-7.88093	3.24966e-15	8.90297e-14
BnaA02g10400D	357.853	8.96887	0.906499	8.61594	6.93678e-18	2.54264e-16
BnaA02g10420D	10.4806	3.40718	1.16854	2.84104	0.00449665	0.0161076
BnaA02g10540D	9.14755	5.5689	1.547	3.5954	0.000323897	0.00162878
BnaA02g10650D	31.9375	-3.94618	0.833592	-4.66328	3.11214e-06	2.40426e-05
BnaA02g10830D	299.554	-3.06356	0.408859	-7.48916	6.93157e-14	1.62845e-12
BnaA02g10840D	4.75786	4.53067	1.70093	2.65306	0.00797655	0.0262317
BnaA02g10860D	62.3553	-2.09538	0.601193	-3.4823	0.000497121	0.00238159
BnaA02g10940D	46.5127	7.90149	1.36646	5.78164	7.39762e-09	8.86965e-08
BnaA02g10960D	47.7341	3.15274	0.641045	4.89937	9.61422e-07	8.15097e-06
BnaA02g10980D	165.214	-4.2949	0.537668	-7.96033	1.71588e-15	4.85321e-14
BnaA02g11080D	412.315	-2.60464	0.40312	-6.45979	1.0485e-10	1.63252e-09
BnaA02g11140D	5.83845	-4.80274	1.64626	-2.90935	0.0036218	0.0134066
BnaA02g11150D	29.1077	2.07098	0.738762	2.79874	0.0051303	0.0180532
BnaA02g11260D	22.3068	6.88464	1.41829	4.85276	1.21753e-06	1.01399e-05
BnaA02g11430D	1167.87	-3.27132	0.319847	-10.2262	1.51326e-24	1.06185e-22
BnaA02g11540D	120.236	-6.60591	0.770637	-8.12809	4.36118e-16	1.32274e-14
BnaA02g11730D	640.638	11.3143	1.32273	8.5236	1.54663e-17	5.42994e-16
BnaA02g11790D	66.7624	-4.36915	0.66257	-6.52567	6.76987e-11	1.08503e-09
BnaA02g11920D	18.0318	3.85561	1.04912	3.59003	0.000330641	0.00165847
BnaA02g12130D	44.7456	-3.04638	0.637702	-4.75856	1.94976e-06	1.56601e-05
BnaA02g12160D	21.4463	-6.75613	1.42631	-4.73512	2.18927e-06	1.74362e-05
BnaA02g12180D	171.588	-2.5898	0.551318	-4.69505	2.66537e-06	2.08451e-05
BnaA02g12270D	224.988	2.21158	0.448365	4.93141	8.16372e-07	7.0026e-06
BnaA02g12290D	5938.41	-8.15513	1.18629	-6.86812	6.50514e-12	1.21097e-10
BnaA02g12330D	7541.8	-2.26571	0.484785	-4.67362	2.95938e-06	2.29523e-05
BnaA02g12470D	4.85481	4.56552	1.69322	2.6865	0.00722044	0.0240903
BnaA02g12480D	21.9889	2.73697	0.819191	3.3233	0.000889595	0.00398377
BnaA02g12530D	5.88486	-4.78396	1.66159	-2.86993	0.00410562	0.0149023
BnaA02g12540D	35.7053	-3.42385	0.733433	-4.63345	3.59627e-06	2.74403e-05
BnaA02g12590D	8783.82	14.6766	1.20614	11.0201	3.05724e-28	2.87677e-26
BnaA02g12690D	4.20562	4.31197	1.73999	2.46619	0.0136557	0.0412164
BnaA02g12790D	137.132	-4.83306	0.616205	-7.78606	6.9132e-15	1.82363e-13
BnaA02g12860D	28.2423	6.02767	1.24811	4.1612	3.16583e-05	0.000199466
BnaA02g12890D	31.7876	3.95156	0.83954	4.64149	3.45898e-06	2.64839e-05
BnaA02g12930D	50.0503	-2.24018	0.62245	-3.59442	0.000325118	0.00163415
BnaA02g12940D	9.0506	5.55044	1.55099	3.57393	0.00035166	0.00174956
BnaA02g13040D	5.4225	-4.60778	1.7059	-2.68894	0.00716791	0.0239405
BnaA02g13170D	34.2745	7.48087	1.38472	5.40154	6.60712e-08	6.79584e-07
BnaA02g13370D	61.9266	-6.07367	1.61658	-3.48307	0.000495708	0.00237589
BnaA02g13410D	370.384	-4.85848	0.563446	-8.60228	7.81455e-18	2.85652e-16
BnaA02g13460D	20.5943	-3.28065	1.16359	-2.79141	0.00524794	0.0183991
BnaA02g13470D	1000.42	6.70099	1.891	4.42664	9.57103e-06	6.72396e-05
BnaA02g13520D	5.78502	4.84792	1.64994	2.92997	0.00339	0.0126729
BnaA02g13590D	240.982	-7.92443	0.811397	-8.9652	3.0972e-19	1.30916e-17
BnaA02g13660D	31.2425	-3.1065	0.734997	-4.20064	2.66157e-05	0.000170931
BnaA02g13690D	6.13345	-4.84543	1.65409	-2.92037	0.00349614	0.013011
BnaA02g13730D	40.2077	-7.54977	1.42113	-5.30969	1.09813e-07	1.08568e-06
BnaA02g13750D	33.577	-2.13817	0.678527	-3.14546	0.00165829	0.00684481
BnaA02g13840D	150.435	-2.83844	0.439039	-6.45981	1.04835e-10	1.63252e-09
BnaA02g13860D	59.5375	3.84453	0.640492	5.9641	2.45989e-09	3.16988e-08
BnaA02g13870D	61.8453	-6.3399	1.05428	-5.51934	3.4027e-08	3.67446e-07
BnaA02g13910D	35.311	-4.57289	1.1595	-3.8524	0.000116967	0.000653949
BnaA02g13950D	162.602	3.4482	0.450751	7.63908	2.18787e-14	5.41971e-13
BnaA02g13960D	45.8785	4.52613	0.791523	5.61993	1.91034e-08	2.14784e-07
BnaA02g13980D	5.58986	-4.73441	1.65638	-2.84988	0.00437353	0.0157406
BnaA02g14030D	4.06019	4.27416	1.74116	2.44262	0.014581	0.0434737
BnaA02g14070D	886.169	9.45632	0.76102	11.5426	8.04417e-31	9.29337e-29
BnaA02g14080D	16.0688	3.66966	1.05221	3.4129	0.000642757	0.00298714
BnaA02g14260D	678.645	-2.5112	0.352749	-7.11813	1.09405e-12	2.23849e-11
BnaA02g14340D	850.247	-3.59958	0.592859	-6.06986	1.28024e-09	1.7136e-08
BnaA02g14360D	15.4871	3.63964	1.02043	3.48847	0.000485802	0.00233387
BnaA02g14430D	143.137	-4.15556	0.530462	-7.80564	5.92011e-15	1.57807e-13
BnaA02g14440D	81.7826	-4.10029	0.582316	-6.99601	2.63364e-12	5.15301e-11
BnaA02g14710D	19.9905	-3.96783	1.00814	-3.83667	0.000124714	0.000693189
BnaA02g14870D	152.768	4.65087	0.513721	9.00517	2.15323e-19	9.20376e-18
BnaA02g14960D	7.16309	-3.94982	1.51888	-2.42432	0.0153372	0.0453675
BnaA02g15010D	184.805	2.01031	0.430419	4.66953	3.01894e-06	2.33802e-05
BnaA02g15100D	4.95176	4.58634	1.69301	2.69922	0.00695021	0.0233143
BnaA02g15110D	207.607	4.82552	0.455785	10.5383	5.75095e-26	4.47139e-24
BnaA02g15190D	2849.6	-6.26036	1.05703	-5.91983	3.22267e-09	4.08852e-08
BnaA02g15200D	56.3941	-3.89155	0.64184	-6.01658	1.78142e-09	2.33687e-08
BnaA02g15250D	56.817	-5.87922	0.892306	-6.20462	5.48289e-10	7.75805e-09
BnaA02g15510D	127.606	2.73716	0.540206	5.06294	4.1285e-07	3.71733e-06
BnaA02g15600D	6.90914	5.13051	1.6066	3.18707	0.00143723	0.00604529
BnaA02g15620D	458.86	4.94481	0.498741	9.89511	4.37124e-23	2.65685e-21
BnaA02g15690D	57.0138	-6.3387	0.981798	-5.86585	4.4683e-09	5.52536e-08
BnaA02g15750D	98.9474	5.87908	0.707028	8.06671	7.22191e-16	2.12974e-14
BnaA02g15890D	325.702	-5.43162	0.47227	-11.4409	2.61014e-30	2.8841e-28
BnaA02g15900D	776.682	-4.82308	1.05457	-4.5706	4.86339e-06	3.61961e-05
BnaA02g15910D	1656.26	-5.39151	1.40947	-3.83663	0.000124735	0.000693234
BnaA02g15920D	44.6279	-7.73017	1.3942	-5.54286	2.97569e-08	3.23698e-07
BnaA02g15980D	64.1592	-6.04297	1.67435	-3.3599	0.000779717	0.00354356
BnaA02g15990D	111.804	-3.02977	0.521246	-5.80456	6.45341e-09	7.79547e-08
BnaA02g16100D	332.361	2.40231	0.352111	6.82119	9.0288e-12	1.6395e-10
BnaA02g16130D	4.1958	4.3154	1.74059	2.46633	0.0136507	0.041212
BnaA02g16210D	18.4179	5.4451	1.27387	3.73793	0.000185539	0.000989446
BnaA02g16320D	17.8825	3.84605	1.00354	3.74259	0.000182135	0.00097295
BnaA02g16460D	16.2823	-2.45774	0.968109	-2.52503	0.0115687	0.0358471
BnaA02g16520D	164.167	2.60194	0.442382	5.87853	4.13928e-09	5.14598e-08
BnaA02g16660D	5.38769	-4.65134	1.6786	-2.7612	0.00575886	0.0198634
BnaA02g16670D	322.005	-10.3563	1.33109	-7.76357	8.25685e-15	2.16094e-13
BnaA02g17050D	189.929	9.77033	1.32493	7.37384	1.65784e-13	3.73655e-12
BnaA02g17100D	30.0168	6.16307	1.20229	4.36743	1.25716e-05	8.62598e-05
BnaA02g17120D	14.0962	3.18538	1.01552	3.09152	0.00199132	0.00803634
BnaA02g17180D	121.651	3.16083	0.487467	6.47515	9.47152e-11	1.48191e-09
BnaA02g17190D	15.5143	6.33158	1.47556	4.28828	1.8006e-05	0.000119813
BnaA02g17260D	293.261	-5.75331	0.647416	-8.82048	1.13969e-18	4.56725e-17
BnaA02g17280D	75.2369	-2.7599	0.548545	-5.02325	5.08052e-07	4.50897e-06
BnaA02g17500D	45.246	-7.77152	1.38149	-5.62428	1.86285e-08	2.09754e-07
BnaA02g17570D	133.44	-2.37875	0.597464	-3.97959	6.90336e-05	0.000404919
BnaA02g17580D	15.3689	6.33156	1.46934	4.30672	1.65696e-05	0.000110962
BnaA02g17600D	875.793	10.8204	1.49489	6.82275	8.93128e-12	1.62345e-10
BnaA02g17630D	7.71979	4.14114	1.44512	2.62728	0.00860701	0.0279666
BnaA02g17890D	16.4929	2.25233	0.8983	2.49768	0.012501	0.0382701
BnaA02g18080D	375.297	-3.32432	1.15391	-2.88036	0.00397226	0.0144943
BnaA02g18090D	24.1581	6.96835	1.42537	4.8871	1.02333e-06	8.63318e-06
BnaA02g18150D	68.525	-3.0395	0.675162	-4.49191	7.05861e-06	5.09121e-05
BnaA02g18220D	17.1422	6.49393	1.45351	4.46571	7.98022e-06	5.69882e-05
BnaA02g18360D	12.7397	-3.28512	1.15956	-2.77857	0.00545984	0.0190068
BnaA02g18670D	52.6129	3.0475	0.792122	3.83636	0.000124872	0.000693779
BnaA02g18740D	18.1782	-2.65317	0.9025	-2.92147	0.00348381	0.0129751
BnaA02g18810D	250.413	10.1252	1.32429	7.64532	2.08431e-14	5.1752e-13
BnaA02g18840D	162.276	-3.80413	0.491719	-7.71934	1.16937e-14	2.99565e-13
BnaA02g18850D	77.9427	-3.32528	0.568891	-5.82874	5.58477e-09	6.81106e-08
BnaA02g19090D	17.5045	3.81437	1.00727	3.69906	0.000216395	0.00113603
BnaA02g19140D	275.223	4.5491	1.21136	3.74988	0.000176919	0.000947943
BnaA02g19290D	105.534	-3.87079	0.529913	-7.27728	3.40627e-13	7.40165e-12
BnaA02g19300D	1362.08	-2.75592	0.410886	-6.70674	1.99022e-11	3.44594e-10
BnaA02g19550D	43.7705	-2.42302	0.610865	-3.95897	7.52724e-05	0.000438374
BnaA02g19620D	34.3472	-2.14878	0.662367	-3.23843	0.0012019	0.00518021
BnaA02g19670D	84.9945	-8.59092	1.36939	-6.27212	3.56171e-10	5.15891e-09
BnaA02g19690D	81.0665	-7.4734	1.12412	-5.52325	3.32788e-08	3.59731e-07
BnaA02g19720D	278.382	3.60764	0.477747	7.54451	4.53997e-14	1.08574e-12
BnaA02g19900D	6.90914	5.13051	1.6066	3.18707	0.00143723	0.00604529
BnaA02g19960D	18.6123	-6.43391	1.50961	-4.25612	2.08001e-05	0.000136596
BnaA02g20000D	84.6462	8.61418	1.38614	6.21246	5.21619e-10	7.40034e-09
BnaA02g20060D	20.9204	4.94567	1.11066	4.16423	3.12411e-05	0.000197164
BnaA02g20130D	12.7934	3.32364	1.08893	2.99554	0.00273959	0.0105478
BnaA02g20350D	9.17942	-5.5064	1.54956	-3.54879	0.000387002	0.00190635
BnaA02g20360D	14.1329	-6.09435	1.512	-4.0259	5.67577e-05	0.000339423
BnaA02g20410D	428.079	3.77325	0.357049	10.5605	4.54472e-26	3.54908e-24
BnaA02g20570D	129	2.26751	0.497807	4.5529	5.29118e-06	3.91013e-05
BnaA02g20580D	13.0969	-3.99476	1.37724	-2.7856	0.00534293	0.0186817
BnaA02g20640D	269.927	-4.48788	1.19961	-3.73542	0.000187401	0.000998777
BnaA02g20690D	25.4983	-7.00918	1.40522	-4.98672	6.14121e-07	5.37245e-06
BnaA02g20700D	16.9066	-2.45278	0.960846	-2.54052	0.0110687	0.0345266
BnaA02g20770D	44.8076	-4.63458	0.818224	-5.54489	2.94131e-08	3.2035e-07
BnaA02g20850D	584.534	-7.34429	1.84271	-4.39309	1.11752e-05	7.74271e-05
BnaA02g20890D	56.5736	-2.88048	0.716424	-4.01131	6.03825e-05	0.000358799
BnaA02g20930D	29.4197	7.26764	1.3965	5.20312	1.95965e-07	1.8644e-06
BnaA02g20950D	567.076	-2.85597	0.398963	-7.15704	8.24371e-13	1.71572e-11
BnaA02g21020D	63.0686	-6.0193	0.874623	-6.46866	9.88765e-11	1.54385e-09
BnaA02g21140D	7.15592	-5.018	1.65918	-3.01321	0.002585	0.0100287
BnaA02g21180D	35.8885	-5.69317	1.03174	-5.07346	3.90654e-07	3.53822e-06
BnaA02g21200D	6.08704	-4.86753	1.63701	-2.96576	0.00301933	0.0114919
BnaA02g21230D	129.332	-2.00811	0.476048	-4.21691	2.47676e-05	0.000160201
BnaA02g21330D	258.468	-2.20749	0.369137	-5.97876	2.24843e-09	2.91006e-08
BnaA02g21340D	8.44989	5.44498	1.56321	3.47835	0.000504502	0.00241326
BnaA02g21420D	2444	-2.60654	0.365306	-7.13496	9.68141e-13	1.99467e-11
BnaA02g21430D	63.7715	-5.95692	0.96183	-5.86205	4.57189e-09	5.64167e-08
BnaA02g21480D	37.091	6.46086	1.18048	4.61771	3.88e-06	2.94156e-05
BnaA02g21580D	324.134	2.61991	0.359	7.29583	2.96813e-13	6.4863e-12
BnaA02g21600D	79.1795	6.07218	0.802363	7.21805	5.27399e-13	1.12625e-11
BnaA02g21610D	11.0876	3.10604	1.12483	2.71498	0.00662803	0.0223944
BnaA02g21730D	12.9362	-4.15517	1.18938	-3.3169	0.000910228	0.00406046
BnaA02g21860D	211.505	6.95907	0.697664	9.62063	6.54286e-22	3.61105e-20
BnaA02g21990D	392.466	8.68364	0.798416	9.89687	4.29489e-23	2.61718e-21
BnaA02g22040D	8.5272	5.42079	1.58636	3.41011	0.000649376	0.003015
BnaA02g22050D	20.6986	6.75309	1.43845	4.69282	2.69468e-06	2.10526e-05
BnaA02g22110D	271.243	-2.32716	0.398013	-5.84549	5.05094e-09	6.18979e-08
BnaA02g22170D	1028.03	10.3947	0.904838	9.84903	6.92119e-23	4.17458e-21
BnaA02g22180D	205.046	9.87114	1.32354	7.45778	8.79946e-14	2.04651e-12
BnaA02g22470D	1191.63	-8.16124	0.540546	-14.8576	6.20911e-50	2.44956e-47
BnaA02g22570D	164.824	9.52535	1.35394	7.0341	2.00552e-12	3.97809e-11
BnaA02g22620D	1098.27	9.32091	0.623586	14.1838	1.15404e-45	3.4146e-43
BnaA02g22690D	10.8983	-3.75504	1.31563	-2.74801	0.00599584	0.0205729
BnaA02g22840D	135.234	7.61496	0.943371	7.18289	6.82551e-13	1.43684e-11
BnaA02g22950D	114.545	6.59016	0.784226	7.97866	1.47929e-15	4.21989e-14
BnaA02g23040D	18.0057	-4.65862	1.12103	-3.90461	9.43772e-05	0.000538047
BnaA02g23460D	1431.55	-2.78875	0.360513	-7.73491	1.03475e-14	2.68043e-13
BnaA02g23670D	71.536	-6.65604	1.82511	-3.61866	0.000296131	0.0015055
BnaA02g23820D	548.603	-9.50458	0.878369	-9.32457	1.1143e-20	5.4099e-19
BnaA02g23840D	3.96324	4.22527	1.754	2.39548	0.0165987	0.0484559
BnaA02g23870D	1295.88	-2.59559	0.508121	-5.1079	3.25762e-07	2.99237e-06
BnaA02g24030D	20.6545	2.49402	0.841212	2.95245	0.00315265	0.0119083
BnaA02g24050D	5.29486	-4.63036	1.68015	-2.74599	0.00603287	0.0206853
BnaA02g24080D	21.9179	-5.63163	1.24153	-3.98367	6.78587e-05	0.000398906
BnaA02g24090D	15.0875	-6.25335	1.46556	-4.26448	2.00369e-05	0.000132023
BnaA02g24130D	2694.96	-7.06755	1.8349	-4.39286	1.1187e-05	7.74682e-05
BnaA02g24330D	22.3081	-6.77493	1.44326	-4.69171	2.70927e-06	2.11574e-05
BnaA02g24370D	147.692	8.38309	1.0848	6.16628	6.99132e-10	9.72195e-09
BnaA02g24660D	53.1317	-5.12611	0.789367	-6.30103	2.95679e-10	4.32982e-09
BnaA02g24680D	298.984	10.352	1.32359	7.82071	5.25252e-15	1.40646e-13
BnaA02g24730D	5.41686	4.73894	1.66656	2.83492	0.0045837	0.0163731
BnaA02g24840D	5.31807	-4.65179	1.67075	-2.77511	0.00551835	0.0191833
BnaA02g24880D	340.454	-9.45874	1.0518	-7.10353	1.21612e-12	2.47472e-11
BnaA02g24910D	195.253	-4.31943	0.449206	-9.58594	9.16206e-22	5.00988e-20
BnaA02g24940D	5.28326	-4.61477	1.68747	-2.72417	0.00644626	0.0218885
BnaA02g24980D	6.72506	5.08231	1.61526	3.13982	0.00169053	0.00696173
BnaA02g25010D	993.787	-2.00424	0.324292	-6.18011	6.40555e-10	8.96592e-09
BnaA02g25080D	15.9696	6.39841	1.45861	4.38456	1.16218e-05	8.02081e-05
BnaA02g25110D	61.1187	-5.27867	0.806078	-6.3584	2.03872e-10	3.04658e-09
BnaA02g25160D	8.36276	5.41317	1.5732	3.43565	0.00059114	0.00277388
BnaA02g25170D	24.1666	6.88193	1.47648	4.65615	3.22185e-06	2.48181e-05
BnaA02g25180D	76.297	7.4746	1.11958	5.45721	4.83681e-08	5.08997e-07
BnaA02g25210D	10.63	5.78104	1.53076	3.77203	0.000161923	0.000875784
BnaA02g25220D	10.514	5.75504	1.53439	3.74657	0.000179268	0.000958887
BnaA02g25450D	48.6779	2.2952	0.579857	3.95286	7.72214e-05	0.000448792
BnaA02g25480D	10.283	-3.79664	1.24876	-2.90791	0.00363857	0.0134649
BnaA02g25530D	273.39	-2.08411	0.364546	-5.71598	1.09072e-08	1.27504e-07
BnaA02g25550D	322.853	-10.3695	1.32759	-7.79768	6.30562e-15	1.67413e-13
BnaA02g25610D	495.784	-2.49302	0.385102	-6.47271	9.62635e-11	1.50525e-09
BnaA02g25790D	27.7049	2.98348	0.789901	3.75608	0.000172596	0.000927299
BnaA02g25930D	30.9746	-6.07413	1.23697	-4.27451	1.91556e-05	0.000126704
BnaA02g26000D	348.498	-3.73755	0.37847	-9.86658	5.81132e-23	3.5211e-21
BnaA02g26100D	75.0757	-2.45763	0.563894	-4.35356	1.33942e-05	9.13865e-05
BnaA02g26130D	27.1475	-2.1322	0.78428	-2.71284	0.00667085	0.0225062
BnaA02g26140D	19.7111	-6.60749	1.45222	-4.54727	5.43459e-06	4.00721e-05
BnaA02g26240D	112.598	3.01345	0.473361	6.35774	2.04744e-10	3.05876e-09
BnaA02g26280D	66.9127	4.12063	0.619306	6.60288	4.03258e-11	6.69069e-10
BnaA02g26400D	30.6584	-3.59705	0.929285	-3.83235	0.000126923	0.000704513
BnaA02g26490D	22.1547	3.86463	0.994428	3.81437	0.000136528	0.000751424
BnaA02g26500D	32.6171	7.41733	1.38635	5.34926	8.83138e-08	8.89636e-07
BnaA02g26540D	734.989	-9.49748	0.785489	-10.9034	1.11059e-27	1.00083e-25
BnaA02g26610D	841.296	-2.08366	0.323497	-6.44069	1.18932e-10	1.8376e-09
BnaA02g26660D	134.177	-2.70535	0.441668	-6.12038	9.33539e-10	1.2742e-08
BnaA02g26730D	17.2607	4.55429	1.23786	3.48946	0.000484003	0.00232607
BnaA02g26980D	207.066	-3.90002	0.596084	-6.5318	6.49838e-11	1.04435e-09
BnaA02g27000D	12.5872	-3.1019	1.16965	-2.61446	0.00893691	0.0288432
BnaA02g27020D	12.2438	-3.14845	1.09576	-2.82559	0.00471943	0.0167768
BnaA02g27170D	204.848	-2.75935	0.398519	-6.92023	4.50926e-12	8.57666e-11
BnaA02g27280D	21.7396	-3.87508	1.20928	-3.145	0.00166087	0.00685387
BnaA02g27300D	185.947	-4.68631	0.484632	-9.6241	6.32582e-22	3.49851e-20
BnaA02g27330D	20.8564	4.91983	1.11337	4.13877	3.49179e-05	0.000218479
BnaA02g27380D	801.85	-11.5681	1.29084	-8.79623	1.41488e-18	5.6026e-17
BnaA02g27390D	102.579	7.82654	1.13452	5.62803	1.82275e-08	2.05412e-07
BnaA02g27460D	13.8264	-2.566	1.05251	-2.4203	0.0155077	0.0457551
BnaA02g27500D	36.0045	-3.89896	0.783683	-4.91359	8.94244e-07	7.62025e-06
BnaA02g27530D	107.957	-2.5246	0.670648	-3.76146	0.000168922	0.000910039
BnaA02g27550D	91.3927	-3.73363	0.760056	-4.89459	9.85104e-07	8.33714e-06
BnaA02g27560D	22.5463	-3.39991	0.872256	-3.85089	0.000117687	0.000657427
BnaA02g27570D	32.6194	-7.3453	1.39004	-5.28313	1.26992e-07	1.24375e-06
BnaA02g27660D	9.90198	-5.62124	1.53573	-3.65598	0.000256206	0.00132107
BnaA02g27670D	55.9369	-4.38051	0.74583	-5.80014	6.62611e-09	7.99321e-08
BnaA02g27680D	13.3458	-2.53421	0.998166	-2.51983	0.0117413	0.0362908
BnaA02g27790D	374.12	-8.97046	0.909041	-8.5914	8.5918e-18	3.1171e-16
BnaA02g27830D	23.0156	-4.53558	1.08082	-4.03228	5.52395e-05	0.000331344
BnaA02g27870D	54.2157	-4.4735	0.827872	-5.32926	9.86132e-08	9.84634e-07
BnaA02g27950D	66.6665	3.03062	0.544817	5.54953	2.86443e-08	3.12744e-07
BnaA02g27970D	46.9781	-2.77368	0.648193	-4.26742	1.97749e-05	0.000130426
BnaA02g28260D	428.538	-3.68997	0.407998	-9.03805	1.59491e-19	6.93417e-18
BnaA02g28330D	81.4425	2.27232	0.525761	4.31876	1.56907e-05	0.000105634
BnaA02g28380D	724.603	8.95764	0.665973	12.662	9.59913e-37	1.69847e-34
BnaA02g28710D	22.8002	3.41392	0.983182	3.43558	0.000591291	0.00277434
BnaA02g28930D	337.172	2.52301	0.352946	7.14677	8.88436e-13	1.83756e-11
BnaA02g29030D	10.6873	3.91743	1.2681	2.95127	0.00316469	0.0119428
BnaA02g29070D	71.2104	6.26183	0.875521	6.70607	1.99933e-11	3.4606e-10
BnaA02g29090D	82.3717	2.81825	0.5166	5.44747	5.109e-08	5.34893e-07
BnaA02g29150D	408.291	-4.43637	0.559824	-7.91332	2.50614e-15	6.95904e-14
BnaA02g29170D	37.2991	-2.83091	0.685958	-4.11202	3.92205e-05	0.000242945
BnaA02g29310D	10.8631	3.07225	1.13687	2.65782	0.00786473	0.0259297
BnaA02g29390D	673.741	-4.18063	0.394943	-10.5784	3.75476e-26	2.95821e-24
BnaA02g29430D	26.7287	3.33226	0.827827	3.99122	6.57332e-05	0.000387652
BnaA02g29530D	51.3866	2.95458	0.650911	4.5268	5.9883e-06	4.38393e-05
BnaA02g29580D	226.13	3.71654	0.501195	7.40599	1.30176e-13	2.97172e-12
BnaA02g29590D	39.1713	2.17825	0.675411	3.22062	0.00127913	0.00546795
BnaA02g29650D	215.158	-8.83265	1.07141	-6.61261	3.77607e-11	6.28664e-10
BnaA02g29660D	36.8811	7.58601	1.37794	5.50451	3.70193e-08	3.96942e-07
BnaA02g29770D	46.4421	-2.65322	0.606272	-4.36592	1.2659e-05	8.67815e-05
BnaA02g29910D	23.3429	-3.66664	0.878026	-4.11086	3.94189e-05	0.000243976
BnaA02g29960D	5.60147	-4.73447	1.65758	-2.84776	0.00440275	0.0158255
BnaA02g29970D	32.519	-6.13465	1.268	-4.22903	2.34698e-05	0.000152548
BnaA02g29990D	1538.13	-4.38741	1.00726	-4.35519	1.3295e-05	9.07673e-05
BnaA02g30000D	246.896	7.62573	1.79444	4.28692	1.81168e-05	0.000120453
BnaA02g30030D	54.3476	4.29509	0.680874	6.2355	4.5033e-10	6.44042e-09
BnaA02g30050D	9.03527	-5.47427	1.5566	-3.51183	0.000445027	0.00215902
BnaA02g30100D	207.912	-2.32049	0.448778	-5.16899	2.35361e-07	2.21468e-06
BnaA02g30360D	12.0447	-3.57793	1.18871	-2.92401	0.00345549	0.0128895
BnaA02g30470D	5799.84	-3.12606	0.484242	-6.45542	1.07921e-10	1.67671e-09
BnaA02g30550D	61.3601	5.17672	0.748651	6.74132	1.56958e-11	2.76436e-10
BnaA02g30600D	19.1608	2.6633	0.866358	3.05683	0.00223689	0.00886749
BnaA02g30620D	3765.49	-11.2169	0.66328	-15.6998	1.51707e-55	7.55118e-53
BnaA02g30670D	4.75786	4.53067	1.70093	2.65306	0.00797655	0.0262317
BnaA02g30690D	46.1089	-2.89059	0.664721	-4.33559	1.45371e-05	9.85902e-05
BnaA02g30730D	9.74622	-5.59797	1.53761	-3.63641	0.000276464	0.00141416
BnaA02g30740D	2488.76	-3.39559	0.466058	-7.28518	3.21249e-13	7.00343e-12
BnaA02g30770D	19.3348	-2.25268	0.878101	-2.55685	0.0105625	0.0332122
BnaA02g30780D	1269.08	-2.66061	0.358076	-7.42973	1.08817e-13	2.50562e-12
BnaA02g30880D	34.0657	-3.24729	0.806676	-3.99987	6.33762e-05	0.000374956
BnaA02g30900D	4973.3	-2.34847	0.506089	-4.64038	3.47774e-06	2.66045e-05
BnaA02g30940D	27.8364	2.33083	0.881382	2.63821	0.00833448	0.0272289
BnaA02g30960D	144.658	-8.28567	1.09348	-6.16785	6.92234e-10	9.63199e-09
BnaA02g30970D	843.397	8.42472	0.560472	14.5765	3.96599e-48	1.32015e-45
BnaA02g31000D	59.8826	-4.03691	0.748705	-5.35012	8.78948e-08	8.85918e-07
BnaA02g31020D	242.782	-8.37414	0.908233	-8.08833	6.04872e-16	1.80274e-14
BnaA02g31040D	910.119	-3.51881	0.330161	-10.6552	1.64947e-26	1.33916e-24
BnaA02g31250D	101.569	-3.66587	0.549207	-6.65398	2.85266e-11	4.82316e-10
BnaA02g31370D	280.692	-2.17312	0.428733	-5.06778	4.02478e-07	3.6313e-06
BnaA02g31380D	29.8178	-2.54433	0.753271	-3.367	0.000759916	0.00346599
BnaA02g31530D	8.49168	-5.39296	1.56102	-3.44984	0.000560927	0.00264821
BnaA02g31600D	453.01	-8.78891	0.8269	-9.69585	3.14009e-22	1.76784e-20
BnaA02g31630D	76.4551	-2.55875	0.519992	-4.91446	8.9027e-07	7.58881e-06
BnaA02g31820D	213.615	-2.3716	0.43347	-5.46927	4.51884e-08	4.77612e-07
BnaA02g31900D	2063.16	2.59319	0.352791	7.35021	1.97889e-13	4.41903e-12
BnaA02g31910D	1164.26	-3.96392	0.385848	-10.2702	9.60309e-25	6.83758e-23
BnaA02g31930D	244.393	-2.67206	0.376779	-7.08889	1.3519e-12	2.73351e-11
BnaA02g31980D	988.915	-4.21633	1.13918	-3.70126	0.000214532	0.00112703
BnaA02g32000D	453.205	9.91632	1.03543	7.35295	1.93884e-13	4.33868e-12
BnaA02g32030D	52.7598	-8.00874	1.35861	-5.89417	3.76576e-09	4.71242e-08
BnaA02g32040D	31.9664	-7.32363	1.38784	-5.27599	1.32041e-07	1.28916e-06
BnaA02g32100D	58.6041	-2.38814	0.642072	-3.71482	0.000203348	0.0010741
BnaA02g32110D	170.453	-2.06479	0.443647	-4.65275	3.27542e-06	2.51943e-05
BnaA02g32170D	25.0411	-2.35424	0.767039	-3.05998	0.00221353	0.00878338
BnaA02g32210D	4.80929	-4.47166	1.70679	-2.60874	0.00908776	0.0292291
BnaA02g32320D	1292.49	3.35414	0.344844	9.72519	2.35474e-22	1.3413e-20
BnaA02g32420D	34.9931	2.81392	0.71669	3.91245	9.13635e-05	0.000522544
BnaA02g32440D	2635.68	-6.47382	0.363962	-17.7627	1.37345e-70	1.46297e-67
BnaA02g32580D	29.0544	-2.76177	0.742379	-3.70356	0.000212596	0.00111784
BnaA02g32630D	23.6404	-3.08945	0.815981	-3.7557	0.000172858	0.000928238
BnaA02g32710D	22.5758	2.40382	0.784474	3.05366	0.00226071	0.00895057
BnaA02g32770D	27.6426	2.6336	0.771251	3.40216	0.000668553	0.00309487
BnaA02g32820D	42.0907	2.94724	0.640236	4.5874	4.48798e-06	3.3604e-05
BnaA02g32910D	38.2308	-3.28618	0.694442	-4.70377	2.55395e-06	2.00503e-05
BnaA02g33060D	94.9679	3.8676	0.568183	6.78039	1.19849e-11	2.13622e-10
BnaA02g33070D	32.4767	2.20111	0.702509	3.12763	0.0017622	0.00722168
BnaA02g33200D	7.89931	-3.96081	1.52772	-2.43193	0.0150188	0.0445886
BnaA02g33290D	12.5807	-4.75222	1.42266	-3.04786	0.00230478	0.00909666
BnaA02g33410D	159.605	-2.07756	0.426646	-4.86799	1.12737e-06	9.43174e-06
BnaA02g33440D	18.0821	-6.49944	1.45217	-4.47338	7.69944e-06	5.5131e-05
BnaA02g33550D	23.7189	-5.77891	1.2369	-4.09004	4.31305e-05	0.000265038
BnaA02g33580D	58.0736	-3.64845	0.685003	-5.29653	1.18024e-07	1.16211e-06
BnaA02g33690D	14.7099	-2.50744	1.01367	-2.45729	0.013999	0.0420396
BnaA02g33780D	21.4871	-2.12298	0.792299	-2.6722	0.00753562	0.0250087
BnaA02g33820D	9.42801	-5.54925	1.54322	-3.59139	0.000328921	0.00165056
BnaA02g33910D	183.07	-3.06498	0.454367	-6.73979	1.58618e-11	2.79174e-10
BnaA02g33920D	139.419	-3.60685	0.525046	-6.85554	7.1046e-12	1.31201e-10
BnaA02g33930D	118.083	-7.94253	1.12991	-5.80194	6.55536e-09	7.91324e-08
BnaA02g33970D	318.897	-2.18002	0.383617	-5.68179	1.33289e-08	1.53415e-07
BnaA02g34030D	87.1705	-2.99804	0.615716	-4.86139	1.16565e-06	9.73364e-06
BnaA02g34050D	1140.1	5.35944	0.336694	15.8993	6.40826e-57	3.59261e-54
BnaA02g34090D	503.08	-3.27476	0.355829	-9.19977	3.58713e-20	1.63848e-18
BnaA02g34110D	152.455	-4.28338	0.47881	-8.91067	5.0727e-19	2.10083e-17
BnaA02g34120D	1253.45	-5.7171	0.35574	-16.0461	6.09024e-58	3.77163e-55
BnaA02g34230D	180.425	4.08337	0.511513	7.96382	1.66804e-15	4.72291e-14
BnaA02g34260D	190.832	-4.53564	0.456127	-9.90383	4.00627e-23	2.45253e-21
BnaA02g34270D	140.323	8.28853	1.09831	6.05313	1.42055e-09	1.88719e-08
BnaA02g34370D	4.52589	-4.27915	1.77132	-2.39896	0.0164415	0.0480445
BnaA02g34450D	20.3774	-6.63241	1.46038	-4.53851	5.66543e-06	4.16416e-05
BnaA02g34460D	20.5796	-6.66595	1.4484	-4.59979	4.22913e-06	3.1827e-05
BnaA02g34580D	62.0215	-3.70139	0.659134	-5.58526	2.33344e-08	2.58533e-07
BnaA02g34690D	161.232	4.63564	0.561776	8.21305	2.15642e-16	6.73205e-15
BnaA02g34850D	39.3869	-3.54119	0.737052	-4.7688	1.85328e-06	1.4928e-05
BnaA03g00160D	470.5	4.13421	0.383731	10.764	5.09243e-27	4.29142e-25
BnaA03g00170D	14.3513	-3.44608	1.03883	-3.2497	0.00115525	0.00500673
BnaA03g00200D	18.8952	-3.51088	0.977967	-3.53347	0.00041014	0.00200677
BnaA03g00250D	28.0098	-4.82289	0.967339	-4.76672	1.87254e-06	1.5074e-05
BnaA03g00400D	42.0209	2.44309	0.615638	3.96084	7.46881e-05	0.000435447
BnaA03g00530D	17.818	-4.65488	1.15714	-3.78084	0.000156303	0.000848837
BnaA03g00750D	68.3805	-4.89778	0.928076	-5.19472	2.05027e-07	1.9454e-06
BnaA03g00800D	41.7493	-2.03854	0.6108	-3.33345	0.000857759	0.00385722
BnaA03g00810D	323.502	9.44641	1.05229	6.97758	3.00308e-12	5.83301e-11
BnaA03g00950D	4.06019	4.27416	1.74116	2.44262	0.014581	0.0434737
BnaA03g01070D	61.2904	-7.02806	1.20086	-4.98138	6.31308e-07	5.51104e-06
BnaA03g01150D	177.917	2.01185	0.45204	4.44956	8.60451e-06	6.09804e-05
BnaA03g01180D	25.1639	-3.14006	0.880976	-3.53743	0.000404042	0.0019802
BnaA03g01220D	64.8369	2.16691	0.58902	3.6759	0.000237015	0.00123177
BnaA03g01360D	4.60712	-4.42335	1.70593	-2.5824	0.00981171	0.0311903
BnaA03g01440D	531.609	2.5601	0.357821	7.15363	8.45116e-13	1.75478e-11
BnaA03g01650D	357.739	-5.17211	0.447938	-11.5039	1.2608e-30	1.42566e-28
BnaA03g01730D	4.66514	-4.4042	1.72328	-2.54364	0.0109703	0.0342779
BnaA03g01800D	7.56815	5.25972	1.59314	3.29561	0.000982076	0.00433737
BnaA03g02030D	622.795	-11.2407	1.29878	-8.53899	1.35396e-17	4.79776e-16
BnaA03g02090D	101.942	4.31367	0.55141	7.77693	7.43078e-15	1.95725e-13
BnaA03g02100D	2401.43	11.2232	0.759843	13.0744	4.61147e-39	9.41004e-37
BnaA03g02110D	26743.7	16.1706	1.15478	12.2121	2.67844e-34	3.94064e-32
BnaA03g02120D	174.243	9.60767	1.34861	7.12311	1.0552e-12	2.16315e-11
BnaA03g02130D	495.294	10.9712	1.33356	8.22607	1.93455e-16	6.07145e-15
BnaA03g02140D	19593.6	15.736	1.17187	11.8283	2.78728e-32	3.57705e-30
BnaA03g02150D	34.3539	3.91605	0.774607	4.99175	5.98344e-07	5.25035e-06
BnaA03g02160D	28.4545	3.76289	0.8906	4.17237	3.01446e-05	0.000191105
BnaA03g02200D	170.374	2.43637	0.437666	5.56439	2.63077e-08	2.89547e-07
BnaA03g02310D	126.049	2.47025	0.516088	4.78364	1.72145e-06	1.39357e-05
BnaA03g02440D	4.15714	4.30393	1.73802	2.46453	0.0137191	0.0413718
BnaA03g02510D	13.1108	-3.70091	1.11136	-3.2299	0.00123834	0.00531793
BnaA03g02520D	8776.34	13.8575	0.98832	10.0714	7.39216e-24	4.86048e-22
BnaA03g02560D	923.242	-2.33693	0.419547	-5.56975	2.55107e-08	2.813e-07
BnaA03g02640D	710.305	-5.68922	0.422631	-13.4243	4.35816e-41	1.00481e-38
BnaA03g02660D	91.0545	3.0634	0.490345	6.23649	4.47491e-10	6.40498e-09
BnaA03g02710D	151.772	2.32759	0.632495	3.67865	0.000234468	0.00121984
BnaA03g02780D	22.3827	-6.82211	1.41906	-4.80601	1.53971e-06	1.25849e-05
BnaA03g02790D	5.1159	-4.58829	1.68079	-2.72038	0.00652078	0.0220965
BnaA03g02840D	1355.77	2.0197	0.326196	6.19148	5.96025e-10	8.37786e-09
BnaA03g02850D	294.107	2.77305	0.420928	6.58568	4.52802e-11	7.44314e-10
BnaA03g02910D	59.9088	3.02978	0.602608	5.01477	5.30956e-07	4.70128e-06
BnaA03g03190D	161.168	-4.4937	0.501567	-8.91853	4.72516e-19	1.96761e-17
BnaA03g03220D	350.658	-2.3802	0.38728	-6.14478	8.00748e-10	1.10256e-08
BnaA03g03250D	17.5673	-2.79671	0.900843	-3.08019	0.00206867	0.00829383
BnaA03g03340D	25.3657	-6.99007	1.41219	-4.94836	7.48409e-07	6.46045e-06
BnaA03g03540D	126.193	2.10789	0.46798	4.50255	6.71426e-06	4.86715e-05
BnaA03g03680D	101.55	-2.95595	0.554848	-5.32	1.03766e-07	1.03221e-06
BnaA03g03720D	109.817	-2.39989	0.454815	-5.27294	1.34257e-07	1.30935e-06
BnaA03g03740D	18.3217	-5.34115	1.28733	-3.6891	0.000225051	0.0011766
BnaA03g03800D	127.707	-7.4683	0.941539	-7.07066	1.54195e-12	3.1013e-11
BnaA03g03890D	18.7892	3.15911	0.898277	3.48058	0.000500323	0.00239499
BnaA03g03920D	4.33532	-4.31106	1.7298	-2.48019	0.0131313	0.0398746
BnaA03g03930D	20.4243	-5.56246	1.25882	-3.89664	9.75378e-05	0.000554168
BnaA03g03940D	82.4558	-2.7152	0.55712	-4.86719	1.13199e-06	9.46595e-06
BnaA03g04000D	31.1704	6.20696	1.20311	4.39294	1.11828e-05	7.74596e-05
BnaA03g04010D	73.5265	2.672	0.552198	4.83219	1.35038e-06	1.11504e-05
BnaA03g04040D	26.244	-7.04897	1.40307	-5.02277	5.09304e-07	4.51858e-06
BnaA03g04050D	40.0662	4.78395	0.828912	5.61707	1.94222e-08	2.18092e-07
BnaA03g04110D	215.67	-2.84855	0.485405	-5.86517	4.48662e-09	5.54655e-08
BnaA03g04150D	4.90328	4.57764	1.6922	2.69542	0.00702991	0.0235416
BnaA03g04160D	37.1502	-7.46095	1.41594	-5.26684	1.38794e-07	1.35064e-06
BnaA03g04230D	307.857	-3.75869	0.556648	-6.74605	1.51921e-11	2.67831e-10
BnaA03g04250D	7.1946	4.05017	1.46491	2.54209	0.0110192	0.0343905
BnaA03g04290D	147.179	-8.66596	1.58432	-5.38028	7.43693e-08	7.5878e-07
BnaA03g04300D	141.689	-2.10525	0.428482	-4.91138	9.04384e-07	7.69927e-06
BnaA03g04460D	68.1407	2.31942	0.557048	4.15971	3.1865e-05	0.000200689
BnaA03g04490D	34.7031	3.93141	0.768047	5.05352	4.33749e-07	3.88841e-06
BnaA03g04630D	183.809	3.97054	0.448274	8.8383	9.71857e-19	3.91826e-17
BnaA03g04640D	58.1956	-3.01029	0.590616	-5.08269	3.72122e-07	3.38495e-06
BnaA03g04710D	11.2845	-3.44672	1.18048	-2.84325	0.00446558	0.016021
BnaA03g04730D	48.5182	-2.95512	0.681897	-4.31994	1.56073e-05	0.000105152
BnaA03g04780D	18.2386	2.57648	0.895426	2.86224	0.00420652	0.015228
BnaA03g05000D	29.6682	2.04879	0.689198	2.96786	0.00299883	0.0114319
BnaA03g05010D	17.055	6.47269	1.46162	4.42611	9.59466e-06	6.73612e-05
BnaA03g05170D	376.989	2.7902	0.355117	7.85491	4.00045e-15	1.08759e-13
BnaA03g05190D	356.484	-10.4667	1.33487	-7.80066	6.15853e-15	1.63671e-13
BnaA03g05240D	54.7155	-7.99853	1.38775	-5.762	8.31206e-09	9.88593e-08
BnaA03g05250D	166.442	-9.45961	1.35994	-6.95442	3.54011e-12	6.8189e-11
BnaA03g05290D	90.7032	2.22979	0.508235	4.38458	1.16208e-05	8.02081e-05
BnaA03g05340D	24.3965	-5.00366	1.14172	-4.11698	3.83867e-05	0.000238224
BnaA03g05370D	114.207	3.82393	0.50155	7.60039	2.9524e-14	7.19881e-13
BnaA03g05450D	153.061	2.09862	0.404405	5.18777	2.12832e-07	2.01372e-06
BnaA03g05550D	19.9548	-6.65789	1.43135	-4.64978	3.32295e-06	2.55231e-05
BnaA03g05670D	5.24845	-4.53829	1.72445	-2.61781	0.00884949	0.0286138
BnaA03g05700D	285.367	3.6337	0.423443	8.57338	1.00488e-17	3.60641e-16
BnaA03g05770D	126.322	4.58588	0.644695	7.07293	1.51701e-12	3.05231e-11
BnaA03g05780D	658.905	4.34103	0.477174	9.09069	9.84132e-20	4.36782e-18
BnaA03g05800D	40.2063	-2.39465	0.666349	-3.58669	0.000334903	0.00167574
BnaA03g05870D	118.164	-2.34705	0.44944	-5.21897	1.79916e-07	1.72094e-06
BnaA03g05980D	113.095	2.02756	0.58058	3.49108	0.000481078	0.00231326
BnaA03g05990D	103.397	3.52134	0.495957	7.08218	1.41904e-12	2.86276e-11
BnaA03g06000D	150.039	3.88251	0.504243	7.68117	1.57642e-14	3.96591e-13
BnaA03g06060D	177.782	-2.79329	0.441752	-6.31898	2.63301e-10	3.87808e-09
BnaA03g06220D	10.6129	-5.72146	1.52618	-3.74471	0.000180604	0.000965452
BnaA03g06250D	567.759	2.35034	0.427886	5.49234	3.96643e-08	4.23513e-07
BnaA03g06360D	57.3563	8.18915	1.3541	6.04708	1.47494e-09	1.95457e-08
BnaA03g06400D	18.9101	5.50276	1.26541	3.79323	0.000148701	0.00081169
BnaA03g06410D	24.0554	4.29498	0.953482	4.3798	1.1879e-05	8.18239e-05
BnaA03g06450D	661.085	-2.20164	0.607037	-3.62657	0.000287207	0.00146405
BnaA03g06480D	13.9245	2.67303	0.983233	2.69721	0.0069924	0.0234366
BnaA03g06560D	4.8325	-4.4966	1.69586	-2.64127	0.00825968	0.0270277
BnaA03g06610D	382.898	2.80735	0.380828	7.36965	1.71074e-13	3.8509e-12
BnaA03g06640D	1703.87	-9.38327	0.692004	-13.1277	2.28628e-39	4.75645e-37
BnaA03g06650D	71.3579	-7.32266	1.13037	-5.40691	6.41226e-08	6.6069e-07
BnaA03g06700D	99.9235	-4.7477	0.58647	-8.01378	1.11234e-15	3.21618e-14
BnaA03g06800D	39.5051	-3.1268	0.895885	-3.4755	0.0005099	0.00243646
BnaA03g06810D	40.6459	-3.82346	0.933529	-4.05861	4.93655e-05	0.000299585
BnaA03g06820D	11.1608	-4.48681	1.45114	-2.85116	0.00435605	0.0156873
BnaA03g06830D	37.7585	-2.96767	0.918995	-3.21723	0.00129434	0.00552631
BnaA03g06840D	23.7251	-6.74654	1.49971	-4.49258	7.03649e-06	5.078e-05
BnaA03g06850D	42.7247	-6.45902	1.24655	-4.48817	7.18369e-06	5.17231e-05
BnaA03g06910D	88.2748	-2.1546	0.68566	-3.14049	0.00168665	0.00694788
BnaA03g06920D	13.6704	-4.23855	1.17852	-3.40911	0.000651752	0.00302525
BnaA03g07000D	15.6452	-2.73687	0.972028	-2.79388	0.00520805	0.0182809
BnaA03g07130D	11.5679	-3.46592	1.20361	-2.80535	0.00502619	0.0177231
BnaA03g07160D	119.091	2.07193	0.435368	4.75714	1.96354e-06	1.57589e-05
BnaA03g07170D	157.063	3.40359	0.471478	7.20912	5.63164e-13	1.19783e-11
BnaA03g07200D	65.1386	-3.9993	0.920126	-4.31858	1.57036e-05	0.000105701
BnaA03g07340D	37.6522	2.07497	0.705567	2.93697	0.00331432	0.0124317
BnaA03g07410D	36.6847	-7.48574	1.39339	-5.37095	7.83234e-08	7.96378e-07
BnaA03g07460D	4.63033	-4.42632	1.70714	-2.5822	0.00981734	0.0312044
BnaA03g07480D	18.5386	-3.28637	0.979425	-3.3127	0.000924003	0.00411158
BnaA03g07490D	1716.85	-7.68091	0.501588	-15.2136	2.87243e-52	1.27485e-49
BnaA03g07640D	42.4726	3.32555	0.668162	4.95096	7.38491e-07	6.37873e-06
BnaA03g07650D	21.4766	-2.27884	0.865866	-2.62274	0.0087225	0.0282746
BnaA03g07720D	179.538	3.41474	0.481889	7.07765	1.4662e-12	2.95454e-11
BnaA03g07800D	37.3761	-2.57382	0.664827	-3.86112	0.000112867	0.000632423
BnaA03g07900D	27.8239	-5.99379	1.22623	-4.25496	2.09082e-05	0.000137272
BnaA03g07980D	320.603	2.3593	0.414195	5.69501	1.23366e-08	1.42865e-07
BnaA03g08050D	65.2061	2.16957	0.558715	3.87988	0.00010451	0.000589752
BnaA03g08110D	1774.46	-3.64173	0.380656	-9.5656	1.11554e-21	6.044e-20
BnaA03g08170D	70.6922	2.96551	0.556447	5.31864	1.04548e-07	1.03941e-06
BnaA03g08190D	199.268	3.08181	0.448673	6.86356	6.71652e-12	1.24726e-10
BnaA03g08200D	83.9322	-2.85843	0.753017	-3.78982	0.000150758	0.000821993
BnaA03g08220D	64.4207	4.83551	0.723542	6.57351	4.91432e-11	8.05577e-10
BnaA03g08320D	167.953	-2.10961	0.455616	-4.62883	3.67729e-06	2.80104e-05
BnaA03g08390D	224.35	-2.59831	0.443391	-5.85765	4.69457e-09	5.77966e-08
BnaA03g08410D	10.989	5.78163	1.54881	3.72779	0.000193169	0.00102716
BnaA03g08470D	88.5949	-2.1469	0.535897	-4.00364	6.2375e-05	0.000369731
BnaA03g08560D	6.2544	-4.89248	1.6416	-2.97191	0.0029595	0.0112933
BnaA03g08620D	51.2781	2.10808	0.576382	3.65373	0.000258456	0.00133202
BnaA03g08640D	534.068	2.42056	0.35676	6.78398	1.16907e-11	2.08797e-10
BnaA03g08680D	4.5253	4.45054	1.71312	2.58687	0.00968509	0.0308467
BnaA03g08690D	9.67621	3.28022	1.19901	2.67017	0.00758134	0.0251323
BnaA03g08760D	208.438	-2.45075	0.474366	-5.16437	2.41256e-07	2.26375e-06
BnaA03g08780D	20.8215	-6.72058	1.42595	-4.71145	2.45966e-06	1.93614e-05
BnaA03g08810D	48.5982	2.63343	0.736128	3.57072	0.000356002	0.00176859
BnaA03g08820D	277.497	-5.87425	0.554778	-10.4879	9.82089e-26	7.49356e-24
BnaA03g08850D	664.258	-11.3154	1.29959	-8.57585	9.83548e-18	3.53938e-16
BnaA03g08910D	36.6	-2.61213	0.686473	-3.79447	0.00014796	0.000808057
BnaA03g09110D	74.0848	3.90856	0.592084	6.56564	5.18102e-11	8.45391e-10
BnaA03g09250D	16.8256	-3.6938	1.00337	-3.59778	0.000320939	0.00161543
BnaA03g09260D	73.1816	2.29893	0.510112	4.50269	6.70983e-06	4.86467e-05
BnaA03g09270D	16.4908	-2.72612	1.10621	-2.44853	0.0143441	0.0428885
BnaA03g09290D	87.452	-3.57374	0.591378	-6.02355	1.70632e-09	2.24332e-08
BnaA03g09400D	93.0808	-2.64294	0.558979	-4.72284	2.32571e-06	1.84378e-05
BnaA03g09430D	18.1616	-6.42381	1.49882	-4.28089	1.86146e-05	0.000123477
BnaA03g09510D	177.679	7.56592	0.819516	8.50957	1.74574e-17	6.0968e-16
BnaA03g09530D	42.1338	-3.20851	0.679344	-4.69998	2.60191e-06	2.03787e-05
BnaA03g09580D	31.1296	-7.24115	1.41464	-5.11678	3.10793e-07	2.86673e-06
BnaA03g09590D	69.111	8.43271	1.34973	6.24714	4.18034e-10	5.99948e-09
BnaA03g09750D	76.6999	-2.66161	0.507293	-5.23925	1.61228e-07	1.55249e-06
BnaA03g09790D	65.7041	-2.29658	0.767912	-2.98786	0.00280934	0.0107867
BnaA03g09930D	32.2217	-7.31929	1.39547	-5.24379	1.57307e-07	1.51721e-06
BnaA03g10100D	16.9901	-6.33829	1.49987	-4.22127	2.42925e-05	0.000157415
BnaA03g10120D	125.639	-2.94763	0.539536	-5.45739	4.83184e-08	5.08575e-07
BnaA03g10330D	294.696	3.91905	0.474943	8.24196	1.69419e-16	5.3486e-15
BnaA03g10360D	486.182	2.62206	0.357761	7.3278	2.33954e-13	5.17449e-12
BnaA03g10370D	8.36276	5.41317	1.5732	3.43565	0.00059114	0.00277388
BnaA03g10380D	219.377	5.38666	0.515974	10.3625	3.67411e-25	2.68054e-23
BnaA03g10410D	47.628	3.21397	0.723563	4.42446	9.66853e-06	6.78368e-05
BnaA03g10550D	327.551	-7.08971	1.32558	-5.21228	1.86531e-07	1.77846e-06
BnaA03g10620D	324.846	-3.8178	0.405188	-9.4124	4.84919e-21	2.43874e-19
BnaA03g10650D	343.288	-2.87356	0.385822	-7.4452	9.68007e-14	2.24055e-12
BnaA03g10690D	157.706	-2.44642	0.433444	-5.64133	1.68743e-08	1.90809e-07
BnaA03g10740D	32.8403	-6.23649	1.20159	-4.47937	7.48647e-06	5.37361e-05
BnaA03g10930D	4.99041	4.6062	1.68977	2.71574	0.00661283	0.0223543
BnaA03g10950D	21.781	-6.78394	1.42178	-4.7699	1.84317e-06	1.48533e-05
BnaA03g11010D	105.749	-2.75494	0.649938	-4.23397	2.29606e-05	0.000149594
BnaA03g11020D	19.0107	-2.45243	0.870681	-2.80306	0.00506199	0.0178399
BnaA03g11030D	56.5326	-2.61756	0.56478	-4.6261	3.72615e-06	2.83421e-05
BnaA03g11060D	193.192	-3.33008	0.426334	-7.80234	6.07687e-15	1.61582e-13
BnaA03g11100D	1246.62	2.98111	0.421889	7.06541	1.6014e-12	3.21725e-11
BnaA03g11130D	248.681	3.16179	0.485294	6.51115	7.45755e-11	1.18952e-09
BnaA03g11320D	87.6002	-4.03733	0.751301	-5.34821	8.8829e-08	8.9398e-07
BnaA03g11350D	46.6624	-2.0999	0.614323	-3.41443	0.000639165	0.00297226
BnaA03g11410D	510.602	-4.5811	0.468543	-9.76476	1.59489e-22	9.24292e-21
BnaA03g11650D	14.1981	-3.04316	1.12869	-2.66371	0.00772847	0.0255421
BnaA03g11670D	480.003	-3.7913	0.446804	-8.4801	2.24998e-17	7.74608e-16
BnaA03g11680D	9.71847	3.772	1.28639	2.80849	0.00497742	0.0175651
BnaA03g11690D	86.1811	2.44687	0.555991	4.39706	1.09726e-05	7.61422e-05
BnaA03g11700D	244.835	-5.26357	0.478104	-10.9405	7.37795e-28	6.76321e-26
BnaA03g11770D	285.732	-5.65286	0.596044	-9.41682	4.64947e-21	2.34494e-19
BnaA03g11920D	124.829	-5.19651	0.577134	-8.89141	6.03378e-19	2.48149e-17
BnaA03g11930D	6.64714	-4.77333	1.74025	-2.72441	0.00644164	0.0218798
BnaA03g11980D	41.3927	-7.5851	1.42158	-5.33278	9.67219e-08	9.67564e-07
BnaA03g12040D	113.469	6.31481	0.726988	8.34338	7.21992e-17	2.37069e-15
BnaA03g12110D	6.30843	4.96474	1.63835	3.02273	0.00250507	0.00977634
BnaA03g12120D	20.6478	3.31364	0.878055	3.73165	0.00019023	0.00101264
BnaA03g12150D	25.0388	5.20694	1.08608	4.46081	8.16509e-06	5.81137e-05
BnaA03g12160D	8.29464	5.38111	1.59015	3.37694	0.000732967	0.00335662
BnaA03g12170D	5.08736	4.64217	1.68093	2.75231	0.00591763	0.0203305
BnaA03g12240D	8.69848	4.32764	1.41477	2.78505	0.00535199	0.018706
BnaA03g12270D	130.682	-4.06242	0.661129	-6.12406	9.12202e-10	1.24636e-08
BnaA03g12300D	24.3133	-6.94053	1.41039	-4.91969	8.66822e-07	7.4001e-06
BnaA03g12390D	33.76	-3.59853	0.835972	-4.26504	1.99868e-05	0.00013171
BnaA03g12460D	88.6364	8.77127	1.33875	6.5514	5.69995e-11	9.2384e-10
BnaA03g12500D	51.4583	2.46843	0.646176	3.81437	0.000136532	0.000751424
BnaA03g12520D	30.0764	-2.70332	0.958035	-2.81194	0.00492436	0.0174101
BnaA03g12700D	298.027	-4.70386	0.608123	-7.71516	1.20834e-14	3.08214e-13
BnaA03g12780D	27.501	-4.79605	0.969331	-4.73209	2.22222e-06	1.76647e-05
BnaA03g12850D	5.9691	4.89171	1.64656	2.96242	0.00305236	0.0115928
BnaA03g12860D	39.9824	-7.54698	1.41892	-5.31612	1.06004e-07	1.05186e-06
BnaA03g13120D	6.77975	3.94238	1.47864	2.4621	0.0138126	0.0416041
BnaA03g13130D	47.0879	6.12496	0.998503	5.60073	2.13455e-08	2.38132e-07
BnaA03g13140D	297.21	-3.65513	1.19234	-3.06453	0.00218012	0.00868186
BnaA03g13250D	10.3148	4.60316	1.37906	3.0088	0.00262279	0.0101568
BnaA03g13300D	5.61307	-4.73209	1.66016	-2.84168	0.00448762	0.0160828
BnaA03g13330D	2431.36	-2.53671	0.336335	-7.54197	4.62936e-14	1.10563e-12
BnaA03g13340D	55.488	2.44475	0.634849	3.84571	0.000120203	0.000669932
BnaA03g13350D	81.4961	4.53325	0.599994	7.48316	7.25586e-14	1.70013e-12
BnaA03g13450D	32.24	-7.24347	1.4369	-5.03797	4.70486e-07	4.19866e-06
BnaA03g13510D	150.865	-9.38437	1.33727	-7.01692	2.26817e-12	4.46252e-11
BnaA03g13570D	9.70206	2.89782	1.14089	2.50142	0.0123696	0.037914
BnaA03g13580D	78.3032	3.69553	0.563026	6.53698	6.27716e-11	1.01124e-09
BnaA03g13630D	36.2516	-3.77275	0.747481	-4.99202	5.97507e-07	5.24486e-06
BnaA03g13660D	152.927	-4.54379	0.65424	-6.9138	4.71855e-12	8.94643e-11
BnaA03g13730D	18.5289	-3.86191	1.00217	-3.75872	0.000170787	0.000918967
BnaA03g13740D	98.9461	-4.2042	0.541002	-7.72568	1.11262e-14	2.86542e-13
BnaA03g13820D	16.5558	-6.38747	1.45406	-4.39071	1.12983e-05	7.81783e-05
BnaA03g13840D	65.5894	-7.19201	1.13105	-5.31694	1.05526e-07	1.04757e-06
BnaA03g13870D	23.5311	5.08543	1.1076	4.29009	1.78602e-05	0.000118917
BnaA03g13900D	22.766	-3.32001	0.979669	-3.35487	0.000794033	0.00360094
BnaA03g14030D	492.594	-8.85392	0.873325	-9.29205	1.51338e-20	7.24179e-19
BnaA03g14080D	17.6975	-4.12727	1.1561	-3.44985	0.000560889	0.00264821
BnaA03g14100D	13.2344	3.76043	1.11659	3.26807	0.00108285	0.00472719
BnaA03g14140D	807.824	-2.31545	0.356857	-6.48799	8.69906e-11	1.3695e-09
BnaA03g14150D	189.754	-2.23904	0.472988	-4.73242	2.21857e-06	1.76383e-05
BnaA03g14280D	73.8974	6.7696	0.9706	6.29293	3.11535e-10	4.55075e-09
BnaA03g14290D	495.541	11.0119	1.31739	8.35852	6.35105e-17	2.09963e-15
BnaA03g14310D	51.6575	-2.4439	0.584438	-4.17455	2.98572e-05	0.000189466
BnaA03g14360D	27.5773	2.85317	0.770331	3.686	0.000227803	0.00118842
BnaA03g14390D	120.991	4.74301	0.54426	8.64785	5.248e-18	1.94912e-16
BnaA03g14480D	467.542	-8.54821	0.729447	-10.9107	1.02497e-27	9.29964e-26
BnaA03g14560D	123.067	-2.80233	0.489481	-5.71966	1.06738e-08	1.25022e-07
BnaA03g14640D	16.2312	-3.34252	0.987015	-3.33268	0.000860145	0.00386675
BnaA03g14700D	176.742	-2.2372	0.41477	-5.39197	6.96912e-08	7.14335e-07
BnaA03g14710D	6.76814	3.95872	1.48102	2.46547	0.0136833	0.0412778
BnaA03g14720D	155.73	-2.16493	0.410267	-5.27497	1.32781e-07	1.29591e-06
BnaA03g14730D	64.4156	4.54867	0.66802	6.72454	1.76146e-11	3.07687e-10
BnaA03g14760D	112.325	-2.00124	0.438001	-4.56711	4.94505e-06	3.67731e-05
BnaA03g14810D	2355.04	6.30258	0.395542	15.9145	5.02964e-57	2.88908e-54
BnaA03g14930D	31.2415	7.35083	1.39214	5.27922	1.29738e-07	1.26877e-06
BnaA03g14940D	61.5724	8.26276	1.36151	6.06805	1.29469e-09	1.73121e-08
BnaA03g15050D	18.7931	4.27783	1.09007	3.78616	0.000152993	0.000832642
BnaA03g15070D	19.8321	-6.54689	1.49034	-4.38804	1.14374e-05	7.90995e-05
BnaA03g15190D	41.6856	2.18842	0.612534	3.56777	0.000360026	0.00178668
BnaA03g15240D	231.094	6.89557	0.638731	10.4606	1.3105e-25	9.91417e-24
BnaA03g15270D	39.2623	-5.34937	1.69937	-2.98169	0.00286658	0.0109827
BnaA03g15300D	10.0103	5.61451	1.57932	3.54841	0.000387568	0.00190895
BnaA03g15320D	28.4251	2.73713	0.978777	2.78592	0.00533763	0.0186656
BnaA03g15420D	285.86	-10.2265	1.32462	-7.71988	1.1644e-14	2.98434e-13
BnaA03g15560D	53.1317	8.0828	1.3586	5.94874	2.70208e-09	3.46354e-08
BnaA03g15650D	6.85601	-5.03317	1.62179	-3.096	0.0019615	0.00793465
BnaA03g16020D	245.052	-2.84792	0.401662	-7.08686	1.37192e-12	2.7719e-11
BnaA03g16040D	134.982	2.11691	0.437354	4.83849	1.30826e-06	1.08311e-05
BnaA03g16100D	288.413	2.19821	0.384885	5.71031	1.1277e-08	1.31537e-07
BnaA03g16270D	310.227	5.1771	0.435921	11.8269	2.83398e-32	3.62824e-30
BnaA03g16450D	565.276	-3.71112	0.407222	-9.1085	8.35255e-20	3.72258e-18
BnaA03g16520D	150.076	-5.70415	0.641171	-8.75259	2.08509e-18	8.08224e-17
BnaA03g16620D	12.4486	-4.10953	1.24112	-3.14621	0.00165401	0.00682979
BnaA03g16650D	200.822	-4.5468	0.508994	-8.90089	5.54028e-19	2.28736e-17
BnaA03g16690D	13.5103	-4.95454	1.33331	-3.34606	0.000819681	0.00370463
BnaA03g16790D	280.452	-2.32792	0.49404	-4.71098	2.46524e-06	1.94024e-05
BnaA03g16830D	270.254	-6.83765	0.694086	-9.61129	7.16438e-22	3.94589e-20
BnaA03g16900D	324.577	-10.4012	1.3187	-7.88428	3.16344e-15	8.68013e-14
BnaA03g16960D	168.913	-2.05006	0.426248	-4.80822	1.52277e-06	1.24541e-05
BnaA03g16980D	11.8791	-5.90279	1.4997	-3.9328	8.39629e-05	0.000484685
BnaA03g17000D	49.1804	-5.02898	0.79692	-6.12562	9.03295e-10	1.23577e-08
BnaA03g17020D	1703.36	-4.91991	0.342538	-14.3557	9.80693e-47	3.07239e-44
BnaA03g17030D	660.892	-7.99125	0.62193	-12.5054	6.97848e-36	1.15425e-33
BnaA03g17070D	23.295	-3.44312	0.947487	-3.5907	0.000329794	0.00165468
BnaA03g17230D	10.7754	-5.72515	1.53391	-3.72783	0.000193136	0.00102708
BnaA03g17320D	756.897	9.27647	0.717025	11.9778	4.64713e-33	6.36251e-31
BnaA03g17400D	167.629	3.48391	0.539929	6.44375	1.16556e-10	1.80508e-09
BnaA03g17410D	12.885	-6.02258	1.48743	-4.04612	5.20734e-05	0.000314157
BnaA03g17480D	94.4004	-5.33315	0.723133	-7.23835	4.54186e-13	9.76564e-12
BnaA03g17520D	844.915	-3.74466	0.441079	-8.48692	2.12179e-17	7.33318e-16
BnaA03g17600D	89.1583	-3.89851	0.537784	-7.2147	5.40536e-13	1.152e-11
BnaA03g17620D	4.5607	-4.376	1.72591	-2.52314	0.0116311	0.036009
BnaA03g17650D	25.8696	-6.92324	1.46237	-4.73036	2.24127e-06	1.78081e-05
BnaA03g17660D	13.8678	-6.12999	1.47718	-4.14716	3.36631e-05	0.000211173
BnaA03g17680D	130.508	-4.02552	0.520702	-7.70365	1.32233e-14	3.36806e-13
BnaA03g17700D	5.08108	-4.58003	1.68143	-2.71435	0.00664062	0.0224227
BnaA03g17770D	11.2261	-5.80584	1.51592	-3.82615	0.000130161	0.000720309
BnaA03g17820D	89.1322	-4.84085	0.618471	-7.7284	1.08906e-14	2.80747e-13
BnaA03g17830D	43.4033	-2.76322	0.654812	-4.20774	2.57943e-05	0.000166276
BnaA03g17900D	21.2086	5.6614	1.24646	3.93762	8.22944e-05	0.00047599
BnaA03g17910D	30.617	3.92763	0.81457	4.75208	2.01332e-06	1.61123e-05
BnaA03g17960D	114.854	-8.03307	1.66876	-4.70775	2.50468e-06	1.96837e-05
BnaA03g17970D	78.206	-4.47693	0.669703	-6.62111	3.56505e-11	5.96328e-10
BnaA03g18140D	38.7393	5.38081	0.925364	5.51599	3.46824e-08	3.73614e-07
BnaA03g18220D	83.1625	8.65981	1.35321	6.3987	1.56706e-10	2.38186e-09
BnaA03g18240D	28.8478	7.24653	1.39509	5.19327	2.06637e-07	1.95928e-06
BnaA03g18270D	112.703	-5.7871	0.712756	-7.92255	2.32691e-15	6.48503e-14
BnaA03g18290D	64.962	3.71999	0.768269	4.81973	1.43751e-06	1.1804e-05
BnaA03g18350D	3090.41	-6.73239	0.348535	-19.288	6.76898e-83	1.28753e-79
BnaA03g18480D	346.314	-4.91928	0.424697	-11.5484	7.52137e-31	8.72725e-29
BnaA03g18490D	179.919	-2.19757	0.413938	-5.3072	1.11321e-07	1.09915e-06
BnaA03g18510D	69.0528	-7.24581	1.15508	-5.27092	1.35741e-07	1.32262e-06
BnaA03g18530D	231.491	5.06185	1.18167	4.26684	1.98261e-05	0.000130699
BnaA03g18540D	480.177	-6.83203	0.512347	-13.1561	1.56913e-39	3.32948e-37
BnaA03g18600D	62.3142	-3.22868	0.595724	-5.40142	6.61143e-08	6.79897e-07
BnaA03g18750D	127.567	2.97738	0.48835	6.09021	1.1276e-09	1.52462e-08
BnaA03g18760D	296.617	4.90082	0.472772	10.3331	4.99453e-25	3.60439e-23
BnaA03g18880D	50.8059	-7.95805	1.36019	-5.85004	4.91465e-09	6.0297e-08
BnaA03g18890D	105.4	-2.65333	0.5167	-5.13005	2.8966e-07	2.68576e-06
BnaA03g18900D	61.3752	-6.46259	0.976683	-5.99187	2.07441e-09	2.69795e-08
BnaA03g18910D	112.566	-4.09915	0.533652	-7.6472	2.05403e-14	5.10479e-13
BnaA03g19070D	31.2233	-4.64691	0.91324	-4.92471	8.44858e-07	7.23064e-06
BnaA03g19140D	44.2504	3.29305	0.659623	4.9681	6.76126e-07	5.87532e-06
BnaA03g19250D	412.362	-5.82236	0.486802	-11.8906	1.32505e-32	1.7382e-30
BnaA03g19270D	27.3361	-7.10333	1.40142	-5.06743	4.0323e-07	3.63747e-06
BnaA03g19290D	127.233	-3.62921	0.47608	-7.6048	2.85349e-14	6.97129e-13
BnaA03g19320D	155.722	-2.73333	0.466353	-5.85697	4.71388e-09	5.80075e-08
BnaA03g19350D	25.3387	-3.18351	0.899415	-3.5112	0.000446083	0.00216335
BnaA03g19370D	6.35883	-4.92126	1.63526	-3.00159	0.00268572	0.0103729
BnaA03g19400D	1672.32	-8.75134	0.588479	-14.5993	2.83885e-48	9.75447e-46
BnaA03g19450D	25.8078	-3.32824	0.920438	-3.58374	0.000338706	0.00169136
BnaA03g19690D	87.0122	-7.59329	1.11917	-5.62214	1.8861e-08	2.12147e-07
BnaA03g19770D	33.2087	7.43039	1.39035	5.34324	9.12994e-08	9.16937e-07
BnaA03g19810D	15.1931	-2.37643	0.952687	-2.48086	0.0131067	0.0398157
BnaA03g19860D	633.216	-2.63774	0.495746	-5.32002	1.03758e-07	1.03221e-06
BnaA03g19900D	46.8026	3.34204	0.717066	4.63942	3.49389e-06	2.67166e-05
BnaA03g20020D	488.196	-10.9309	1.30474	-8.30854	9.68892e-17	3.1293e-15
BnaA03g20150D	381.314	2.55021	0.458071	5.56619	2.60369e-08	2.86746e-07
BnaA03g20180D	124.116	-2.82347	0.554819	-5.08431	3.68966e-07	3.35795e-06
BnaA03g20290D	225.981	-2.10107	0.678975	-3.09388	0.00197561	0.0079814
BnaA03g20310D	401.066	-6.83406	0.638706	-10.5367	5.85301e-26	4.54411e-24
BnaA03g20330D	4.63207	4.39529	1.75126	2.49588	0.0125646	0.0384233
BnaA03g20340D	19.9477	-4.247	1.06133	-3.86676	0.000110292	0.000619362
BnaA03g20510D	6.49872	3.87467	1.49162	2.40492	0.0161762	0.0473992
BnaA03g20580D	10.4969	-5.59903	1.58856	-3.51617	0.000437824	0.00212795
BnaA03g20650D	12.7226	-5.96137	1.51485	-3.93086	8.46427e-05	0.000488088
BnaA03g20690D	14.7369	-3.82152	1.11765	-3.31814	0.000906181	0.00404512
BnaA03g20730D	22.4229	-5.59218	1.32736	-3.74838	0.000177981	0.000952577
BnaA03g20780D	7.09062	-3.91922	1.46461	-2.4958	0.0125674	0.0384294
BnaA03g20930D	183.344	-2.31702	0.512752	-4.5173	6.26345e-06	4.56778e-05
BnaA03g21000D	8.02965	4.1721	1.4629	2.61825	0.00883817	0.0285852
BnaA03g21040D	47.7195	-2.48821	0.621078	-3.99896	6.36223e-05	0.00037612
BnaA03g21050D	256.124	7.39794	0.805679	8.80101	1.35591e-18	5.38511e-17
BnaA03g21110D	23.4546	4.24945	0.968215	4.27063	1.94923e-05	0.000128754
BnaA03g21140D	54.0902	-3.86108	2.04221	-2.42426	0.0153398	0.0453727
BnaA03g21210D	2391.76	-3.00666	0.342877	-8.76844	1.81152e-18	7.06292e-17
BnaA03g21240D	433.621	-2.65227	0.348725	-7.60396	2.87213e-14	7.01362e-13
BnaA03g21280D	319.908	8.06704	0.730682	10.324	5.48971e-25	3.9457e-23
BnaA03g21300D	48.5143	2.189	0.579341	3.77397	0.000160668	0.000869706
BnaA03g21320D	96.513	-3.92766	0.56686	-6.89878	5.24503e-12	9.89182e-11
BnaA03g21340D	89.6994	4.19925	0.593404	7.03478	1.99576e-12	3.96169e-11
BnaA03g21360D	30.8663	-2.43566	0.698704	-3.47627	0.000508442	0.00243036
BnaA03g21390D	14.4047	-6.14468	1.49646	-4.10223	4.09179e-05	0.000252432
BnaA03g21500D	206.307	-3.03055	0.440376	-6.87674	6.12394e-12	1.14561e-10
BnaA03g21540D	79.2698	-5.65669	1.45481	-3.77159	0.000162211	0.000876984
BnaA03g21560D	116.319	-5.91837	0.8269	-6.97689	3.01778e-12	5.85942e-11
BnaA03g21600D	971.636	-10.3099	0.869728	-10.0925	5.96322e-24	3.95511e-22
BnaA03g21640D	9.01697	-5.20373	1.70009	-3.04325	0.00234037	0.00922276
BnaA03g21750D	9.88073	-3.62815	1.31307	-2.66342	0.0077351	0.0255577
BnaA03g21830D	23.4123	2.24097	0.769762	2.90349	0.00369031	0.0136194
BnaA03g21920D	575.96	4.44448	0.607208	7.31266	2.61904e-13	5.75918e-12
BnaA03g21930D	97.1585	-2.96178	0.520103	-5.686	1.30053e-08	1.50021e-07
BnaA03g21970D	1126.6	-3.67352	0.345464	-10.6311	2.1367e-26	1.71642e-24
BnaA03g21990D	197.288	-4.73779	0.461654	-10.2137	1.72104e-24	1.19662e-22
BnaA03g22000D	116.59	-3.23564	0.49347	-6.54593	5.91268e-11	9.55411e-10
BnaA03g22010D	15.9937	-3.58607	1.06312	-3.30317	0.000955988	0.00423797
BnaA03g22020D	40.2249	-2.79718	0.679473	-4.10337	4.07178e-05	0.000251343
BnaA03g22050D	143.753	8.33066	1.0918	6.10492	1.0285e-09	1.3988e-08
BnaA03g22230D	10.9778	2.77669	1.0801	2.54137	0.011042	0.0344536
BnaA03g22360D	231.466	-3.0848	0.392554	-7.85278	4.06922e-15	1.10347e-13
BnaA03g22470D	16.156	-2.73991	1.01523	-2.67969	0.00736907	0.0245319
BnaA03g22500D	260.869	-5.33992	0.504452	-10.5211	6.90414e-26	5.31369e-24
BnaA03g22520D	32.5747	-2.1351	0.671258	-3.17492	0.00149877	0.00627639
BnaA03g22580D	33.7223	7.45179	1.38918	5.36314	8.17879e-08	8.29072e-07
BnaA03g22590D	204.986	4.01213	0.426287	9.39279	5.84292e-21	2.92745e-19
BnaA03g22610D	596.857	-2.41932	0.379248	-6.3785	1.78835e-10	2.69207e-09
BnaA03g22620D	39.7166	6.55988	1.1737	4.7004	2.59649e-06	2.03452e-05
BnaA03g22670D	244.716	-3.77356	0.417097	-9.03482	1.64271e-19	7.1303e-18
BnaA03g22680D	357.206	-2.89893	0.349943	-8.28099	1.22151e-16	3.89328e-15
BnaA03g22690D	128.359	-3.20903	0.496032	-6.45977	1.04862e-10	1.63252e-09
BnaA03g22700D	19.019	2.81285	0.876272	3.18822	0.00143149	0.00602734
BnaA03g22710D	840.572	-9.36704	0.726816	-11.9265	8.60837e-33	1.14332e-30
BnaA03g22720D	32.201	-6.186	1.19567	-4.46225	8.11053e-06	5.77716e-05
BnaA03g22740D	20.4959	-2.18027	0.888601	-2.44588	0.01445	0.0431604
BnaA03g22890D	71.0759	-3.54352	0.608621	-5.7988	6.67914e-09	8.04625e-08
BnaA03g22900D	222.955	2.23182	0.477483	4.67301	2.96811e-06	2.30166e-05
BnaA03g22910D	2308.11	12.9211	1.2711	9.65505	4.67939e-22	2.61237e-20
BnaA03g23020D	7.50985	5.25889	1.59102	3.29923	0.000969515	0.0042915
BnaA03g23130D	15.6992	4.52144	1.14577	3.7203	0.000198983	0.00105418
BnaA03g23290D	154.833	-3.25325	0.443905	-7.3193	2.49259e-13	5.49475e-12
BnaA03g23330D	2225.73	-3.01048	0.547474	-5.49853	3.82969e-08	4.09899e-07
BnaA03g23350D	36.2944	2.97982	0.687019	4.31907	1.56689e-05	0.000105501
BnaA03g23380D	1866.87	-6.79248	0.464998	-14.5697	4.38016e-48	1.44896e-45
BnaA03g23510D	10.4688	-5.70861	1.52341	-3.74342	0.00018153	0.000970039
BnaA03g23530D	4.37013	-4.33735	1.72002	-2.51053	0.0120549	0.0370923
BnaA03g23540D	5.17391	-4.5384	1.71431	-2.63496	0.00841473	0.0274541
BnaA03g23580D	212.876	-2.20417	0.455639	-4.83622	1.3233e-06	1.0942e-05
BnaA03g23710D	1173.02	11.2051	1.00578	8.31428	9.23137e-17	2.99059e-15
BnaA03g24010D	70.5586	-2.01081	0.530549	-3.78761	0.000152105	0.000828318
BnaA03g24150D	322.51	8.40439	0.803753	9.54644	1.34236e-21	7.19967e-20
BnaA03g24170D	129.807	2.22626	0.42757	5.20447	1.94555e-07	1.85197e-06
BnaA03g24290D	1455.55	12.4048	1.27663	9.4543	3.25206e-21	1.67994e-19
BnaA03g24340D	20.5529	-2.84862	0.894511	-3.16268	0.00156322	0.00650738
BnaA03g24370D	25.8423	-2.4822	0.817499	-3.02522	0.00248454	0.00970972
BnaA03g24390D	4.89346	4.55443	1.70679	2.65666	0.00789179	0.0259947
BnaA03g24520D	35.7106	-2.59014	0.746473	-3.46012	0.000539931	0.00256134
BnaA03g24550D	38.1283	2.70602	0.666147	4.05051	5.11063e-05	0.000309023
BnaA03g24610D	33.1025	7.37009	1.42007	5.18782	2.12769e-07	2.01348e-06
BnaA03g24620D	77.3001	2.42492	0.522059	4.64041	3.47717e-06	2.66045e-05
BnaA03g24660D	58.2098	8.18652	1.36418	6.00025	1.9702e-09	2.57183e-08
BnaA03g24670D	11.3007	-5.79817	1.52599	-3.79513	0.000147566	0.000806319
BnaA03g24810D	4.95176	4.58634	1.69301	2.69922	0.00695021	0.0233143
BnaA03g24850D	5.64942	4.80877	1.65508	2.89729	0.00376404	0.0138436
BnaA03g24900D	69.4877	-5.81051	0.812523	-6.83848	8.00359e-12	1.46432e-10
BnaA03g24920D	661.87	-2.92291	0.387385	-7.54378	4.56544e-14	1.09134e-12
BnaA03g24970D	29.101	2.8215	0.78992	3.55644	0.000375921	0.00185725
BnaA03g25140D	67.2375	-5.02715	1.4934	-3.31098	0.000929701	0.00413417
BnaA03g25150D	13.6583	-4.7405	1.44399	-3.01202	0.00259512	0.0100621
BnaA03g25290D	20.8098	5.58654	1.29016	3.78715	0.000152386	0.000829677
BnaA03g25300D	5509.26	4.7631	0.50612	9.40988	4.96702e-21	2.49329e-19
BnaA03g25310D	36.7311	-7.47745	1.39873	-5.34432	9.07551e-08	9.12158e-07
BnaA03g25420D	18.9829	6.64617	1.44083	4.6107	4.01321e-06	3.03478e-05
BnaA03g25430D	417.072	4.51676	0.389916	11.5662	6.11226e-31	7.13887e-29
BnaA03g25440D	2952.38	9.0679	0.452562	19.7816	4.29287e-87	1.20334e-83
BnaA03g25570D	321.099	10.4273	1.33023	7.83808	4.57494e-15	1.23059e-13
BnaA03g25580D	416.695	-3.47384	0.355323	-9.77105	1.49888e-22	8.70541e-21
BnaA03g25650D	4.99041	4.6062	1.68977	2.71574	0.00661283	0.0223543
BnaA03g25660D	130.327	-2.2421	0.537058	-4.17293	3.00705e-05	0.00019068
BnaA03g25700D	168.692	-9.53904	1.33147	-7.16382	7.84594e-13	1.63805e-11
BnaA03g25830D	268.474	-4.85929	1.22572	-3.95556	7.63548e-05	0.000444095
BnaA03g25840D	28.1697	-5.20971	1.16719	-4.18143	2.89681e-05	0.00018437
BnaA03g25850D	206.582	-5.14917	0.698945	-7.32309	2.42328e-13	5.34637e-12
BnaA03g25870D	4.12155	-4.24181	1.73594	-2.43162	0.0150315	0.044612
BnaA03g25950D	12.7595	3.69002	1.14844	3.12261	0.00179252	0.00733296
BnaA03g25990D	27.4721	7.1549	1.41093	5.06964	3.98566e-07	3.59967e-06
BnaA03g26020D	8.80989	-5.42457	1.56781	-3.45443	0.000551457	0.00260998
BnaA03g26050D	5.7059	-4.54544	1.76559	-2.55557	0.0106015	0.0333113
BnaA03g26220D	813.19	-6.92837	0.463591	-14.8267	9.84242e-50	3.74427e-47
BnaA03g26250D	104.141	-8.86681	1.35968	-6.52006	7.02774e-11	1.12366e-09
BnaA03g26280D	50.3946	4.68127	0.743724	6.1766	6.54958e-10	9.15309e-09
BnaA03g26380D	123.154	2.29095	0.585762	3.90924	9.25859e-05	0.000528926
BnaA03g26510D	1491.51	-2.7053	0.303934	-8.90037	5.56615e-19	2.29626e-17
BnaA03g26620D	47.842	3.72072	0.66631	5.5441	2.95471e-08	3.21678e-07
BnaA03g26670D	213.299	4.81532	0.452086	10.6041	2.85298e-26	2.27125e-24
BnaA03g26740D	28.579	-7.16798	1.3963	-5.13241	2.86057e-07	2.6542e-06
BnaA03g27040D	43.0879	-5.09565	0.881562	-5.57422	2.48642e-08	2.74502e-07
BnaA03g27190D	219.932	-6.24544	0.647796	-9.47184	2.74966e-21	1.42594e-19
BnaA03g27210D	89.127	-3.78091	0.539737	-6.97564	3.04483e-12	5.90549e-11
BnaA03g27300D	645.571	-2.1827	0.41345	-5.2788	1.30034e-07	1.2712e-06
BnaA03g27410D	63.7937	-3.0872	0.839398	-3.6689	0.000243592	0.00126299
BnaA03g27420D	113.136	-5.88811	0.868073	-6.61395	3.74205e-11	6.23586e-10
BnaA03g27440D	2428.18	-6.98882	0.552557	-12.619	1.6589e-36	2.86855e-34
BnaA03g27540D	1832.04	-10.7809	0.771089	-12.4378	1.6296e-35	2.56777e-33
BnaA03g27560D	578.489	-10.1785	1.03328	-7.6546	1.93917e-14	4.82833e-13
BnaA03g27580D	295.638	-10.2821	1.31912	-7.79434	6.47478e-15	1.71477e-13
BnaA03g27650D	163.697	-9.50358	1.33017	-7.14419	9.05268e-13	1.87092e-11
BnaA03g27670D	113.152	2.64272	0.560566	4.71055	2.47052e-06	1.94382e-05
BnaA03g27750D	61.8684	-3.7417	0.775285	-4.80079	1.5804e-06	1.28938e-05
BnaA03g27910D	8.19942	-3.4806	1.33842	-2.49867	0.0124659	0.0381873
BnaA03g27940D	120.134	-4.92342	0.559451	-8.7133	2.95151e-18	1.12765e-16
BnaA03g28010D	43.0485	3.67974	0.682546	5.34962	8.81367e-08	8.88188e-07
BnaA03g28130D	276.661	-8.56285	0.908475	-8.24372	1.66934e-16	5.27363e-15
BnaA03g28180D	61.7214	-5.65647	0.818755	-6.61269	3.77408e-11	6.2853e-10
BnaA03g28200D	13.1633	3.36792	1.07509	3.07333	0.00211682	0.00846013
BnaA03g28220D	286.152	2.44882	0.609315	4.01802	5.86888e-05	0.000349671
BnaA03g28250D	39.4503	6.08472	1.85899	3.24594	0.00117064	0.00506395
BnaA03g28360D	530.123	-2.63817	0.448157	-5.88561	3.96578e-09	4.95341e-08
BnaA03g28370D	85.4519	-8.62235	1.3572	-6.35206	2.12447e-10	3.16495e-09
BnaA03g28380D	22.5022	5.02142	1.12083	4.19143	2.772e-05	0.000177381
BnaA03g28480D	726.464	6.11194	0.393497	15.4703	5.50829e-54	2.64294e-51
BnaA03g28510D	657.89	3.41562	0.33532	10.1831	2.36027e-24	1.62201e-22
BnaA03g28520D	4.81615	4.50443	1.71851	2.60973	0.00906146	0.0291586
BnaA03g28540D	219.04	-6.55785	0.645496	-9.90927	3.79422e-23	2.32539e-21
BnaA03g28680D	129.993	4.02179	0.491102	8.16192	3.29729e-16	1.01333e-14
BnaA03g28740D	852.682	-11.6421	1.29073	-8.83997	9.57443e-19	3.86307e-17
BnaA03g28770D	58.0195	-3.26313	0.885953	-3.67132	0.000241302	0.00125222
BnaA03g28840D	7.64375	-4.01507	1.52601	-2.45191	0.0142099	0.042542
BnaA03g29100D	1929.28	-11.2567	0.857443	-11.0352	2.58338e-28	2.47017e-26
BnaA03g29180D	434.935	-2.06283	0.380147	-5.42583	5.76874e-08	5.98802e-07
BnaA03g29190D	8.28951	-5.34787	1.57027	-3.40038	0.000672925	0.00311267
BnaA03g29240D	86.5677	-8.61492	1.36853	-6.29365	3.10096e-10	4.53221e-09
BnaA03g29340D	29.7823	-7.20986	1.40145	-5.14324	2.70045e-07	2.51615e-06
BnaA03g29430D	109.741	-2.85471	0.490746	-5.80996	6.24873e-09	7.56195e-08
BnaA03g29650D	30.884	5.52074	1.04236	4.89249	9.95697e-07	8.4161e-06
BnaA03g29740D	124.473	2.34291	0.521205	4.49281	7.02886e-06	5.07318e-05
BnaA03g29790D	174.737	4.51264	0.496372	9.05536	1.36112e-19	5.97626e-18
BnaA03g29850D	59.6743	3.08418	0.586724	5.24197	1.58869e-07	1.53172e-06
BnaA03g30090D	13.5955	6.14662	1.48908	4.12493	3.70847e-05	0.000230924
BnaA03g30150D	31.6167	3.06986	0.75372	4.05127	5.09395e-05	0.000308084
BnaA03g30180D	4235.09	-2.08437	0.317244	-6.57018	5.02547e-11	8.22025e-10
BnaA03g30240D	117.575	-2.17622	0.489505	-4.44375	8.84046e-06	6.24946e-05
BnaA03g30250D	5.39929	-4.64111	1.68549	-2.74324	0.00608369	0.0208354
BnaA03g30320D	7.16134	5.03156	1.6799	2.98309	0.00285357	0.0109368
BnaA03g30530D	186.715	-2.23088	0.408676	-5.45699	4.84283e-08	5.0953e-07
BnaA03g30580D	369.296	2.60456	0.395594	6.58243	4.62836e-11	7.60339e-10
BnaA03g30620D	32.1956	4.1977	0.84988	4.85028	1.23289e-06	1.02565e-05
BnaA03g30640D	11.4747	-5.83692	1.51328	-3.85343	0.000116475	0.000651464
BnaA03g30680D	798.856	11.6247	1.30772	8.83174	1.03064e-18	4.13335e-17
BnaA03g30740D	697.2	9.91547	0.870413	9.74843	1.87344e-22	1.07751e-20
BnaA03g30980D	60.1437	3.28166	0.596886	5.47919	4.27282e-08	4.53951e-07
BnaA03g31010D	52.1769	5.18059	0.79811	6.29596	3.05512e-10	4.4689e-09
BnaA03g31200D	610.503	3.04458	0.330695	9.20456	3.43075e-20	1.5711e-18
BnaA03g31280D	42.2169	-2.36012	0.757276	-3.11159	0.00186084	0.00758099
BnaA03g31290D	397.41	-4.72965	0.387478	-12.1799	3.97591e-34	5.78561e-32
BnaA03g31330D	53.4334	2.45492	0.586267	4.18111	2.90088e-05	0.000184608
BnaA03g31380D	735.404	2.42463	0.349335	6.94007	3.919e-12	7.50798e-11
BnaA03g31390D	15.457	-6.28411	1.46545	-4.28566	1.82196e-05	0.000121083
BnaA03g31400D	81.7942	-2.73458	0.556301	-4.90897	9.15544e-07	7.78726e-06
BnaA03g31490D	180.188	-3.12128	0.43036	-7.24591	4.29538e-13	9.26185e-12
BnaA03g31560D	40.2232	-4.65237	0.955602	-4.75612	1.9735e-06	1.58245e-05
BnaA03g31590D	7.2773	5.2109	1.597	3.25664	0.0011274	0.00490277
BnaA03g31680D	4.29275	4.36525	1.72648	2.51685	0.0118409	0.0365478
BnaA03g31700D	16.6485	2.58619	0.911284	2.82126	0.00478357	0.01698
BnaA03g31730D	370.278	-2.44289	0.599849	-4.07174	4.66628e-05	0.000284773
BnaA03g31810D	8.18017	-5.12458	1.68262	-3.03127	0.00243528	0.00954384
BnaA03g31830D	23.1384	3.48079	0.877718	3.91891	8.89502e-05	0.000510263
BnaA03g31930D	199.728	-2.14757	0.399568	-5.3733	7.73072e-08	7.86646e-07
BnaA03g31940D	1426.14	-4.7778	0.484718	-9.85176	6.73556e-23	4.06722e-21
BnaA03g31990D	349.79	-3.26824	0.401865	-8.12819	4.35763e-16	1.32241e-14
BnaA03g32140D	20.7533	5.61967	1.25589	3.88871	0.00010078	0.000570761
BnaA03g32320D	381.838	-6.13317	0.469957	-12.9329	2.93583e-38	5.6652e-36
BnaA03g32390D	196.044	7.37629	0.744305	9.3247	1.11298e-20	5.40842e-19
BnaA03g32410D	51.1248	2.90012	0.595566	4.85645	1.19506e-06	9.96521e-06
BnaA03g32700D	28.2926	-4.3183	1.10521	-3.81676	0.000135214	0.000745019
BnaA03g32800D	415.309	-2.36178	0.489765	-4.82146	1.4251e-06	1.17074e-05
BnaA03g32810D	4437.38	-3.63027	0.305688	-11.8751	1.59509e-32	2.07708e-30
BnaA03g32920D	35.839	3.80978	0.777502	4.8481	1.24652e-06	1.03602e-05
BnaA03g32960D	4.52589	-4.27915	1.77132	-2.39896	0.0164415	0.0480445
BnaA03g33150D	20.3851	-3.00677	0.888578	-3.35553	0.000792144	0.0035939
BnaA03g33340D	16.9553	-3.65362	1.03494	-3.45642	0.000547406	0.00259288
BnaA03g33390D	77.7742	-5.00016	0.774023	-6.35672	2.06102e-10	3.07817e-09
BnaA03g33420D	434.261	6.78434	0.495887	13.4919	1.74646e-41	4.09756e-39
BnaA03g33540D	287.472	-2.62938	0.403748	-6.51021	7.50444e-11	1.19557e-09
BnaA03g33560D	13.9139	3.16067	1.0155	3.06835	0.00215246	0.00858068
BnaA03g33590D	92.8377	-2.9784	0.491258	-6.05269	1.42451e-09	1.89149e-08
BnaA03g33610D	39.2345	2.03105	0.624377	3.24899	0.00115817	0.00501856
BnaA03g33800D	191.384	8.11422	0.909434	7.85382	4.03559e-15	1.09573e-13
BnaA03g33820D	10.0822	4.56917	1.38348	2.98054	0.00287744	0.0110164
BnaA03g33840D	8.7211	5.48772	1.56215	3.50764	0.000452096	0.00218932
BnaA03g33890D	88.7007	-6.40071	0.968087	-6.23802	4.43143e-10	6.34615e-09
BnaA03g33930D	110.764	-4.99654	1.37855	-3.59311	0.000326753	0.00164082
BnaA03g34140D	14.098	-4.29019	1.16706	-3.47992	0.000501555	0.00240058
BnaA03g34150D	37.6789	-2.23463	0.693503	-3.21667	0.00129685	0.00553483
BnaA03g34270D	37.1007	4.67691	0.827783	5.50201	3.75483e-08	4.02209e-07
BnaA03g34290D	34.8432	-3.20094	0.817732	-3.89269	9.91392e-05	0.000562426
BnaA03g34340D	330.59	2.54742	0.353335	7.20789	5.68265e-13	1.20819e-11
BnaA03g34410D	1320.14	-10.7353	0.862279	-10.5343	6.00024e-26	4.65163e-24
BnaA03g34470D	11.5482	3.53695	1.16935	2.94492	0.0032304	0.0121606
BnaA03g34520D	23.0593	-2.68119	0.882268	-3.0246	0.00248962	0.00972745
BnaA03g34580D	26.5993	-5.85449	1.28915	-4.00143	6.29618e-05	0.000372836
BnaA03g34620D	785.649	4.03901	0.402547	10.029	1.13656e-23	7.35504e-22
BnaA03g34740D	6.72506	5.08231	1.61526	3.13982	0.00169053	0.00696173
BnaA03g34760D	410.134	-2.25824	0.394088	-5.72945	1.00755e-08	1.18615e-07
BnaA03g34780D	380.089	3.29149	0.407793	8.06765	7.16632e-16	2.11452e-14
BnaA03g34820D	27.4581	-3.04016	0.771145	-3.91664	8.97929e-05	0.000514203
BnaA03g34840D	439.117	9.78445	1.08379	7.0547	1.72972e-12	3.45937e-11
BnaA03g34900D	9.48149	4.47382	1.39738	2.89936	0.00373925	0.0137707
BnaA03g34960D	180.116	-8.58937	1.08	-6.41915	1.3704e-10	2.09851e-09
BnaA03g35000D	12.5972	6.0518	1.49218	4.05265	5.06402e-05	0.000306517
BnaA03g35090D	289.871	6.38054	0.548751	11.4594	2.10965e-30	2.33592e-28
BnaA03g35100D	34.1377	2.78461	0.709093	3.91306	9.11329e-05	0.00052131
BnaA03g35110D	82.8649	3.72606	0.550973	6.73577	1.63063e-11	2.86148e-10
BnaA03g35140D	1221.44	-2.26026	0.391333	-5.7755	7.67231e-09	9.1804e-08
BnaA03g35180D	24.3306	-2.68356	0.794172	-3.3629	0.000771287	0.00351154
BnaA03g35300D	20.543	4.40363	1.0515	4.03418	5.4794e-05	0.000328856
BnaA03g35310D	325.576	-6.20352	0.499646	-12.2724	1.27382e-34	1.91646e-32
BnaA03g35440D	36.2024	7.5586	1.38106	5.47206	4.44825e-08	4.70899e-07
BnaA03g35490D	392.529	9.10856	0.893046	8.84761	8.94126e-19	3.62407e-17
BnaA03g35520D	226.604	-3.39767	0.43955	-7.72245	1.14113e-14	2.92893e-13
BnaA03g35580D	37.8215	-4.85949	0.927618	-5.07286	3.91872e-07	3.54581e-06
BnaA03g35630D	258.1	-3.43585	0.417193	-8.22825	1.89972e-16	5.96916e-15
BnaA03g35640D	14.8611	3.51165	1.10684	3.11244	0.00185545	0.0075608
BnaA03g35800D	47.3623	-7.80246	1.39542	-5.58968	2.27488e-08	2.5257e-07
BnaA03g35820D	54.1737	4.78914	0.735167	6.3884	1.67627e-10	2.5341e-09
BnaA03g35840D	357.372	-9.52873	1.04757	-7.16821	7.59823e-13	1.58945e-11
BnaA03g35870D	40.9555	6.60659	1.17197	4.73587	2.18121e-06	1.73802e-05
BnaA03g35910D	23.7226	5.13716	1.07646	4.44255	8.89008e-06	6.28203e-05
BnaA03g36020D	601.307	-2.96423	0.402725	-7.3588	1.85569e-13	4.15929e-12
BnaA03g36070D	206.391	-2.33977	0.498386	-4.69322	2.68936e-06	2.10203e-05
BnaA03g36080D	600.329	-2.88132	0.446804	-6.44747	1.13732e-10	1.76494e-09
BnaA03g36090D	719.891	-2.98143	0.456179	-6.53439	6.38693e-11	1.02737e-09
BnaA03g36130D	111.601	2.03312	0.443563	4.58177	4.61051e-06	3.44199e-05
BnaA03g36180D	261.205	-2.31425	0.382531	-6.04834	1.46342e-09	1.94075e-08
BnaA03g36390D	511.094	-3.06847	0.422081	-7.26775	3.65521e-13	7.92318e-12
BnaA03g36400D	62.6947	-6.47707	0.972016	-6.03662	1.57377e-09	2.08086e-08
BnaA03g36440D	208.4	-5.2165	0.512763	-10.1018	5.42365e-24	3.61525e-22
BnaA03g36450D	188.173	-3.04287	0.440546	-6.90129	5.1533e-12	9.7326e-11
BnaA03g36460D	156.542	2.75386	0.416862	6.60162	4.06695e-11	6.73932e-10
BnaA03g36480D	19.5548	6.69661	1.43203	4.67466	2.94441e-06	2.28529e-05
BnaA03g36490D	734.448	11.5228	1.30833	8.76774	1.82289e-18	7.10206e-17
BnaA03g36500D	382.877	9.68627	1.04005	7.1847	6.73549e-13	1.41957e-11
BnaA03g36510D	728.786	11.4491	1.32845	8.55294	1.19994e-17	4.27474e-16
BnaA03g36640D	162.547	-3.16319	0.568784	-5.55548	2.76846e-08	3.03261e-07
BnaA03g36670D	52.6846	6.29668	0.990205	5.7843	7.28135e-09	8.73614e-08
BnaA03g36840D	84.0001	4.57079	0.605537	7.47626	7.64699e-14	1.78549e-12
BnaA03g36860D	762.43	-2.39526	0.570895	-4.19525	2.72566e-05	0.000174688
BnaA03g36890D	52.4964	-2.84514	0.59474	-4.77149	1.82867e-06	1.47454e-05
BnaA03g36990D	4.76768	4.50572	1.71223	2.62066	0.00877588	0.0284085
BnaA03g37030D	731.139	2.46958	0.359328	6.87212	6.32562e-12	1.17961e-10
BnaA03g37040D	5.32967	-4.65828	1.66838	-2.78316	0.00538323	0.0187893
BnaA03g37060D	13.9637	6.19836	1.47865	4.18936	2.79745e-05	0.000178773
BnaA03g37070D	4.67674	-4.38731	1.73356	-2.5178	0.0118092	0.0364696
BnaA03g37090D	257.131	-10.0299	1.35139	-7.42056	1.16626e-13	2.67616e-12
BnaA03g37130D	50.3603	-4.60131	0.757157	-5.96686	2.4186e-09	3.11895e-08
BnaA03g37290D	121.895	-3.17362	0.464478	-6.822	8.97789e-12	1.63137e-10
BnaA03g37300D	21.2726	-2.89904	0.84189	-3.41905	0.00062841	0.00292685
BnaA03g37310D	6.25013	4.96857	1.63322	3.03443	0.00240989	0.00945894
BnaA03g37330D	48.8753	-7.90494	1.36238	-5.80164	6.56711e-09	7.92562e-08
BnaA03g37440D	11.4998	3.52567	1.17798	2.91491	0.00355787	0.0132131
BnaA03g37500D	22.6641	-4.15164	0.945356	-4.27217	1.93577e-05	0.000127944
BnaA03g37550D	154.132	-2.11851	0.540946	-3.91507	9.03771e-05	0.000517291
BnaA03g37560D	139.685	-3.62885	0.504872	-7.17232	7.3739e-13	1.54556e-11
BnaA03g37650D	4.06019	4.27416	1.74116	2.44262	0.014581	0.0434737
BnaA03g37690D	11.3904	4.75345	1.35674	3.14052	0.00168646	0.00694763
BnaA03g37700D	8.82787	5.50357	1.55877	3.52601	0.000421878	0.0020589
BnaA03g37780D	360.735	3.10158	0.374683	8.27446	1.29043e-16	4.11048e-15
BnaA03g37790D	4.09834	-4.22292	1.74296	-2.41028	0.0159403	0.0468317
BnaA03g37810D	653.47	2.34376	0.329952	7.10269	1.22356e-12	2.48723e-11
BnaA03g37820D	11.8746	-4.7707	1.35219	-3.19447	0.00140089	0.00592016
BnaA03g37850D	13.2894	-6.06365	1.4859	-4.07782	4.54592e-05	0.000278161
BnaA03g37860D	26.505	-2.35486	0.744279	-3.15481	0.00160601	0.00666465
BnaA03g38010D	129.159	7.56005	0.936546	7.18042	6.94996e-13	1.4613e-11
BnaA03g38140D	5423.26	8.27761	0.493219	16.7348	7.31154e-63	6.08445e-60
BnaA03g38180D	5476.81	-3.7836	1.17855	-3.21181	0.00131903	0.00561596
BnaA03g38350D	172.052	-7.90864	0.919462	-7.59451	3.08957e-14	7.50672e-13
BnaA03g38390D	40.2375	4.31357	0.798163	5.31833	1.04723e-07	1.04077e-06
BnaA03g38440D	9.65339	-5.58007	1.54195	-3.61427	0.00030119	0.00152801
BnaA03g38560D	108.853	-3.45738	0.820819	-4.20398	2.62259e-05	0.00016861
BnaA03g38630D	783.992	-5.8517	1.58477	-3.72346	0.000196509	0.00104336
BnaA03g38670D	110.063	-2.04959	0.480293	-4.26559	1.99377e-05	0.000131402
BnaA03g38750D	1017.47	-5.46698	0.591589	-9.2283	2.74959e-20	1.27895e-18
BnaA03g38770D	75.7411	-2.56425	0.586981	-4.36335	1.28088e-05	8.77408e-05
BnaA03g38820D	9.96037	-3.27324	1.18002	-2.7049	0.00683248	0.0229773
BnaA03g38880D	142.315	-9.3091	1.338	-6.95682	3.48033e-12	6.71347e-11
BnaA03g38910D	986.726	-10.3165	0.872985	-10.0749	7.13092e-24	4.70614e-22
BnaA03g39040D	83.9689	-8.63369	1.3402	-6.44162	1.18203e-10	1.82792e-09
BnaA03g39070D	52.4893	6.92621	1.16381	4.96263	6.95454e-07	6.03244e-06
BnaA03g39080D	303.119	2.77471	0.524736	5.28613	1.2493e-07	1.22489e-06
BnaA03g39190D	6.25995	4.96151	1.63553	3.02616	0.00247679	0.00968511
BnaA03g39240D	436.624	-2.44332	0.506439	-4.82373	1.409e-06	1.15948e-05
BnaA03g39260D	374.614	-8.95948	0.90848	-8.59448	8.36452e-18	3.03879e-16
BnaA03g39280D	99.8498	2.17652	0.655576	3.31832	0.000905621	0.00404295
BnaA03g39360D	32.7555	-2.67475	0.871086	-3.06075	0.00220786	0.00876545
BnaA03g39380D	858.057	-6.43258	0.562499	-11.3869	4.85737e-30	5.31208e-28
BnaA03g39390D	29.0827	2.07505	0.747474	2.77152	0.00557957	0.0193541
BnaA03g39400D	602.248	11.2685	1.3139	8.57242	1.01334e-17	3.6343e-16
BnaA03g39440D	110.974	-8.95284	1.357	-6.59642	4.21213e-11	6.95188e-10
BnaA03g39480D	6.97695	-5.06487	1.61649	-3.12583	0.00177301	0.0072604
BnaA03g39490D	1034.92	-10.9665	1.01586	-8.24842	1.60503e-16	5.08823e-15
BnaA03g39500D	83.3575	-3.75141	0.652328	-5.72666	1.02425e-08	1.20474e-07
BnaA03g39520D	20.558	-2.72151	0.869716	-3.11014	0.00186998	0.00761242
BnaA03g39680D	5.61307	-4.73209	1.66016	-2.84168	0.00448762	0.0160828
BnaA03g39930D	190.271	-2.15027	0.453191	-4.74332	2.10242e-06	1.67908e-05
BnaA03g40090D	46.8429	-3.09319	0.652479	-4.72272	2.32711e-06	1.84461e-05
BnaA03g40100D	7.28356	-5.15426	1.59364	-3.22824	0.00124556	0.00534158
BnaA03g40120D	38.2827	2.79034	0.658773	4.22222	2.4191e-05	0.000156815
BnaA03g40240D	21.1871	5.66872	1.24908	3.93577	8.29304e-05	0.000479148
BnaA03g40290D	107.578	-5.06792	0.676462	-7.4009	1.35266e-13	3.08133e-12
BnaA03g40380D	14.9206	-5.09031	1.32373	-3.45012	0.000560348	0.00264654
BnaA03g40390D	1104.68	5.94053	1.75064	3.51368	0.00044194	0.00214599
BnaA03g40410D	72.1872	7.40088	1.12385	5.39615	6.80877e-08	6.99514e-07
BnaA03g40470D	6.09864	-4.86552	1.63932	-2.96018	0.00307458	0.011663
BnaA03g40500D	740.746	-3.62836	0.482911	-7.51095	5.87006e-14	1.38763e-12
BnaA03g40510D	14.0261	3.43466	1.10699	3.04474	0.00232882	0.00918065
BnaA03g40600D	6.53337	-3.86932	1.49282	-2.41503	0.015734	0.0463302
BnaA03g40740D	32.9834	4.76906	0.941826	4.90294	9.44147e-07	8.00833e-06
BnaA03g40750D	21.5838	-3.48407	0.924988	-3.71638	0.000202098	0.00106855
BnaA03g40790D	13.624	-4.23807	1.17416	-3.42048	0.000625113	0.00291277
BnaA03g40830D	101.676	-5.31588	0.661319	-7.89943	2.80172e-15	7.72345e-14
BnaA03g40940D	316.833	-3.59307	0.47079	-7.62579	2.42543e-14	5.98037e-13
BnaA03g41060D	22.1922	2.35991	0.805824	2.91908	0.00351072	0.0130589
BnaA03g41090D	9532.65	6.97178	0.34577	20.1528	2.542e-90	9.6703e-87
BnaA03g41120D	251.74	2.34179	0.422092	5.54671	2.91088e-08	3.17231e-07
BnaA03g41230D	16.8421	6.36369	1.51284	4.20139	2.65282e-05	0.00017041
BnaA03g41240D	73.1917	6.76191	0.961049	6.34277	2.25668e-10	3.3488e-09
BnaA03g41290D	43.8551	3.18057	0.649697	4.87436	1.09161e-06	9.16134e-06
BnaA03g41380D	12.1714	5.79838	1.60507	3.60242	0.000315263	0.00159062
BnaA03g41430D	22.3319	-3.8133	0.920124	-4.06583	4.78625e-05	0.000291427
BnaA03g41660D	12.701	4.726	1.45429	2.95413	0.0031355	0.0118502
BnaA03g41720D	16.6931	5.2945	1.29369	3.60033	0.000317818	0.00160169
BnaA03g41800D	153.263	-7.26134	0.837676	-8.03415	9.42324e-16	2.75451e-14
BnaA03g41920D	151.466	-3.48657	0.463527	-7.50919	5.94946e-14	1.40515e-12
BnaA03g41940D	224.971	-3.34465	0.568254	-5.8804	4.09282e-09	5.09298e-08
BnaA03g41960D	4929.36	-5.41207	0.360376	-15.0137	5.96789e-51	2.50271e-48
BnaA03g41970D	419.018	-7.42407	0.739026	-9.79358	1.19969e-22	7.04456e-21
BnaA03g42010D	33.7677	-5.13884	1.95182	-2.7264	0.00640298	0.0217624
BnaA03g42040D	9.27225	-5.51705	1.54979	-3.55514	0.000377777	0.00186469
BnaA03g42190D	236.343	-7.90617	0.80303	-9.02981	1.7197e-19	7.4342e-18
BnaA03g42220D	5912.44	14.2226	1.2099	10.8339	2.37903e-27	2.07034e-25
BnaA03g42440D	7593.62	10.0542	0.465127	21.3969	1.42725e-101	9.50173e-98
BnaA03g42450D	9.86486	5.632	1.56022	3.60448	0.000312784	0.00157946
BnaA03g42610D	23.6096	5.82368	1.23551	4.06646	4.77318e-05	0.000290797
BnaA03g42650D	14.1587	-3.44435	1.06742	-3.16015	0.00157689	0.00655968
BnaA03g42750D	32.9258	-2.73145	0.832625	-3.26992	0.00107578	0.00470014
BnaA03g42760D	124.858	5.2717	0.587506	8.86003	7.99912e-19	3.25956e-17
BnaA03g42940D	943.088	2.03582	0.342202	5.94892	2.69922e-09	3.4607e-08
BnaA03g43040D	25.5578	5.92288	1.23352	4.13372	3.56941e-05	0.000223047
BnaA03g43210D	261.509	-2.0869	0.454472	-4.59114	4.40839e-06	3.30685e-05
BnaA03g43240D	24.5847	-4.54645	1.04704	-4.183	2.87689e-05	0.000183212
BnaA03g43350D	58.205	-2.77039	0.595392	-4.6433	3.42885e-06	2.62683e-05
BnaA03g43400D	403.593	-2.17993	0.372551	-5.8506	4.8979e-09	6.01192e-08
BnaA03g43440D	387.997	-4.07718	0.434058	-9.38296	6.41463e-21	3.20485e-19
BnaA03g43460D	17.7135	3.06533	0.911736	3.329	0.000871574	0.00391161
BnaA03g43480D	50.086	2.86735	0.605979	4.71932	2.36636e-06	1.87099e-05
BnaA03g43530D	352.923	-5.13549	0.461646	-11.0847	1.48788e-28	1.45667e-26
BnaA03g43560D	243.888	2.18311	0.503227	4.33729	1.4425e-05	9.78846e-05
BnaA03g43580D	241.833	-2.02764	0.413219	-4.90604	9.29358e-07	7.8942e-06
BnaA03g43600D	152.283	-2.36462	0.501955	-4.70849	2.49559e-06	1.96268e-05
BnaA03g43620D	8.48008	-5.39028	1.56172	-3.44652	0.000567858	0.00267595
BnaA03g43640D	6.89573	-4.89191	1.70257	-2.85835	0.00425845	0.0153847
BnaA03g43660D	38.315	7.64025	1.37502	5.55565	2.76578e-08	3.0303e-07
BnaA03g43760D	9.52359	-3.69671	1.31404	-2.69416	0.00705666	0.0236223
BnaA03g43790D	550.499	-7.59545	0.551823	-13.4333	3.8607e-41	8.93986e-39
BnaA03g43820D	170.725	-2.05711	0.411681	-4.99541	5.87111e-07	5.16415e-06
BnaA03g43830D	279.138	5.81595	0.481183	11.979	4.5757e-33	6.28086e-31
BnaA03g43840D	203.881	4.52964	0.509681	8.85806	8.14196e-19	3.31017e-17
BnaA03g43860D	22.1433	-5.64766	1.23942	-3.99925	6.3544e-05	0.000375782
BnaA03g44070D	38.4721	-3.17404	0.696915	-4.53083	5.87522e-06	4.30885e-05
BnaA03g44170D	7.39517	-3.96867	1.53132	-2.41791	0.0156101	0.0460165
BnaA03g44180D	16.2443	-6.27958	1.50205	-4.17612	2.96529e-05	0.000188302
BnaA03g44280D	55.0938	-2.42166	0.649631	-3.72264	0.00019715	0.00104634
BnaA03g44340D	173.029	2.05715	0.49911	4.12059	3.77899e-05	0.000234904
BnaA03g44360D	34.113	2.44494	0.669366	3.64394	0.000268501	0.00137806
BnaA03g44420D	546.777	-2.023	0.374273	-5.40472	6.49105e-08	6.68291e-07
BnaA03g44480D	110.897	-5.15813	0.592844	-8.58076	9.42463e-18	3.40072e-16
BnaA03g44560D	6.07543	-4.8674	1.63592	-2.96774	0.00299996	0.0114327
BnaA03g44580D	24.7391	7.031	1.40818	4.99174	5.9839e-07	5.25035e-06
BnaA03g44610D	23.69	-3.29769	0.889999	-3.66771	0.000244734	0.00126867
BnaA03g44690D	9.0506	5.55044	1.55099	3.57393	0.00035166	0.00174956
BnaA03g44820D	231.578	-3.61707	0.430907	-8.38381	5.1241e-17	1.70672e-15
BnaA03g44960D	12.8112	-2.6834	1.0972	-2.42319	0.0153848	0.0454556
BnaA03g44970D	226.901	-3.20644	0.515115	-6.22004	4.97017e-10	7.06637e-09
BnaA03g45000D	7.53214	-5.20617	1.58655	-3.27566	0.00105414	0.00461355
BnaA03g45060D	13.182	2.80854	1.01585	2.73764	0.00618822	0.0211336
BnaA03g45080D	1539.41	-2.15086	0.33151	-6.48788	8.70548e-11	1.37011e-09
BnaA03g45150D	5.32967	-4.65828	1.66838	-2.78316	0.00538323	0.0187893
BnaA03g45210D	8.43348	3.51993	1.32641	2.55697	0.0105589	0.0332069
BnaA03g45240D	94.5034	2.36079	0.532943	4.42655	9.57535e-06	6.72522e-05
BnaA03g45320D	92.0624	2.24652	0.466632	4.81118	1.50045e-06	1.22848e-05
BnaA03g45530D	77.1308	-3.09169	0.580663	-5.31235	1.08222e-07	1.07134e-06
BnaA03g45630D	227.51	-3.27502	0.411805	-7.9459	1.92785e-15	5.41824e-14
BnaA03g45650D	19.4557	4.35262	1.02944	4.06966	4.7082e-05	0.000287101
BnaA03g45670D	173.033	6.64668	0.725564	8.86265	7.81348e-19	3.19124e-17
BnaA03g45820D	12.5528	3.29211	1.09044	2.96405	0.00303619	0.0115413
BnaA03g45890D	22.8733	5.78043	1.237	4.03571	5.44376e-05	0.000326976
BnaA03g46000D	9.99064	5.7021	1.53078	3.72111	0.000198352	0.00105178
BnaA03g46040D	58.5492	-7.01414	1.17003	-5.07289	3.91813e-07	3.54581e-06
BnaA03g46140D	993.699	2.18757	0.322023	6.79285	1.09937e-11	1.97541e-10
BnaA03g46190D	15.3399	3.62314	1.03832	3.41382	0.000640587	0.00297809
BnaA03g46200D	58.2298	4.54235	0.687976	6.51099	7.4657e-11	1.19047e-09
BnaA03g46250D	595.777	-11.1485	1.31169	-8.37979	5.30226e-17	1.76275e-15
BnaA03g46260D	23.2842	-6.8813	1.41351	-4.86687	1.1338e-06	9.47808e-06
BnaA03g46360D	10.0793	-3.29088	1.25691	-2.55298	0.0106806	0.0335341
BnaA03g46540D	301.66	-2.77659	0.454884	-6.10168	1.04962e-09	1.42607e-08
BnaA03g46570D	175.93	7.55573	0.822652	8.467	2.51794e-17	8.62399e-16
BnaA03g46580D	18.2147	-6.53015	1.43988	-4.53339	5.80437e-06	4.26276e-05
BnaA03g46590D	16.3475	6.42603	1.45892	4.4025	1.07008e-05	7.43725e-05
BnaA03g46670D	15.2421	4.44207	1.19985	3.50353	0.000459127	0.00221934
BnaA03g46680D	29.0137	5.43072	1.04911	4.79007	1.66726e-06	1.3534e-05
BnaA03g46690D	17.5596	4.68783	1.12861	3.90339	9.48553e-05	0.000540483
BnaA03g46790D	48.0415	-6.0989	0.991175	-5.61329	1.9851e-08	2.22578e-07
BnaA03g46810D	115.529	3.18851	0.567425	5.61109	2.01062e-08	2.25154e-07
BnaA03g46960D	35.6212	-6.3588	1.18662	-4.60219	4.18068e-06	3.1489e-05
BnaA03g47030D	124.842	-3.87033	0.565147	-6.82826	8.59507e-12	1.56608e-10
BnaA03g47050D	17.4413	-2.23215	0.882633	-2.51962	0.0117481	0.03631
BnaA03g47060D	184.272	-7.18687	0.787885	-8.62461	6.43113e-18	2.36871e-16
BnaA03g47080D	4.87891	-4.50829	1.69487	-2.64982	0.00805343	0.0264477
BnaA03g47090D	108.992	7.97051	1.09511	5.86253	4.55872e-09	5.63063e-08
BnaA03g47140D	27.884	-5.9641	1.2216	-4.24733	2.16332e-05	0.000141648
BnaA03g47240D	6.11024	-4.86131	1.64287	-2.95093	0.00316818	0.0119537
BnaA03g47260D	266.074	-2.54294	0.449134	-5.66004	1.51341e-08	1.72486e-07
BnaA03g47540D	147.744	2.98648	0.487075	6.12589	9.01761e-10	1.23399e-08
BnaA03g47560D	47.235	-2.19378	0.640509	-3.42038	0.000625339	0.00291356
BnaA03g47590D	424.116	-2.7953	0.349559	-7.99453	1.30065e-15	3.73632e-14
BnaA03g47640D	7.53031	3.39233	1.31904	2.47879	0.0131829	0.0400106
BnaA03g47680D	88.5784	6.56879	0.860533	7.12956	1.00692e-12	2.06896e-11
BnaA03g47830D	688.259	-2.14725	0.330436	-6.49774	8.15362e-11	1.29127e-09
BnaA03g47860D	5.57826	-4.73195	1.65653	-2.84811	0.00439802	0.0158149
BnaA03g47900D	28.2285	-4.8126	0.99584	-4.62774	3.69675e-06	2.81466e-05
BnaA03g47910D	706.277	-3.40629	0.350371	-9.71904	2.50129e-22	1.42173e-20
BnaA03g48030D	9.59447	3.75944	1.26205	2.85234	0.00433983	0.0156363
BnaA03g48070D	14.3127	3.51502	1.05482	3.26349	0.00110048	0.00479666
BnaA03g48130D	190.02	-3.77598	0.527681	-7.14318	9.11951e-13	1.884e-11
BnaA03g48150D	12.9895	-5.99735	1.50757	-3.97422	7.06099e-05	0.000413618
BnaA03g48210D	49.9675	4.64401	0.801665	5.69167	1.25805e-08	1.455e-07
BnaA03g48290D	28.2084	7.20626	1.40121	5.14172	2.72236e-07	2.53435e-06
BnaA03g48520D	35.9971	3.16214	0.702606	4.47721	7.56238e-06	5.42225e-05
BnaA03g48550D	151.354	2.54096	0.540904	4.69511	2.66468e-06	2.08427e-05
BnaA03g48570D	513.157	-5.56528	0.40338	-13.7457	5.40115e-43	1.39641e-40
BnaA03g48580D	273.428	8.61867	0.89546	8.39825	4.532e-17	1.51709e-15
BnaA03g48590D	4.79769	-4.45316	1.71541	-2.584	0.00976605	0.0310711
BnaA03g48620D	27.0358	-4.69106	1.03122	-4.37374	1.22134e-05	8.39212e-05
BnaA03g48660D	519.364	-10.0341	1.03575	-7.54977	4.3602e-14	1.04604e-12
BnaA03g48670D	7.20233	-5.10088	1.61742	-3.14596	0.00165545	0.00683521
BnaA03g48750D	11.51	-4.68883	1.38899	-3.07277	0.00212081	0.00847352
BnaA03g48780D	13.1452	-6.04962	1.48585	-4.06863	4.72902e-05	0.000288238
BnaA03g48850D	22.9765	5.08999	1.08111	4.38706	1.14895e-05	7.9398e-05
BnaA03g48890D	133.315	-4.77321	0.573612	-8.26104	1.44414e-16	4.59184e-15
BnaA03g48920D	26.8514	4.809	1.00323	4.59154	4.39991e-06	3.30142e-05
BnaA03g48970D	219.175	4.07881	0.474388	8.58136	9.37606e-18	3.38549e-16
BnaA03g49000D	75.3289	5.08224	0.688783	7.24511	4.32099e-13	9.31331e-12
BnaA03g49010D	40.5295	-2.54154	0.758411	-3.34429	0.000824934	0.00372521
BnaA03g49060D	36.6614	4.41016	0.800526	5.39873	6.71156e-08	6.89927e-07
BnaA03g49100D	41.2276	2.75689	0.635843	4.3235	1.53572e-05	0.000103625
BnaA03g49150D	272.094	-4.28988	0.442159	-9.68241	3.58177e-22	2.01437e-20
BnaA03g49160D	69.0557	-4.427	0.670188	-6.53566	6.33279e-11	1.01958e-09
BnaA03g49190D	1578.26	-3.3797	0.425535	-7.94127	2.00129e-15	5.6187e-14
BnaA03g49210D	36.1166	7.43201	1.44435	5.142	2.7183e-07	2.53111e-06
BnaA03g49250D	439.584	-3.46677	0.38244	-9.06011	1.30317e-19	5.74072e-18
BnaA03g49310D	17.4637	3.01402	0.960255	3.11019	0.00186967	0.00761175
BnaA03g49330D	44.4959	3.85371	0.701272	5.44636	5.14098e-08	5.37925e-07
BnaA03g49430D	154.35	-9.41408	1.33718	-7.03962	1.9277e-12	3.83373e-11
BnaA03g49440D	470.356	-2.40866	0.4069	-5.91864	3.24619e-09	4.11542e-08
BnaA03g49460D	37.598	-2.02325	0.748663	-2.69868	0.00696142	0.0233431
BnaA03g49520D	602.973	8.46121	0.639803	12.6209	1.61993e-36	2.81029e-34
BnaA03g49540D	33.8965	7.46811	1.38423	5.39424	6.88143e-08	7.05754e-07
BnaA03g49550D	22.2929	2.05889	0.842749	2.43777	0.0147782	0.0439657
BnaA03g49630D	6.86066	5.12067	1.60794	3.17816	0.00148211	0.00621347
BnaA03g49640D	29.5308	2.03689	0.714051	2.84807	0.0043985	0.0158155
BnaA03g49670D	166.223	6.32647	1.89541	3.62865	0.000284906	0.00145329
BnaA03g49720D	1346.36	12.2818	1.28582	9.30304	1.36484e-20	6.57828e-19
BnaA03g49730D	111.778	9.06073	1.34086	6.75681	1.41067e-11	2.49687e-10
BnaA03g49830D	22.7862	5.77306	1.23834	4.02773	5.63171e-05	0.000337048
BnaA03g49920D	79.2845	8.60895	1.3498	6.37722	1.80327e-10	2.71147e-09
BnaA03g49950D	6.98856	-5.07559	1.61136	-3.14285	0.00167314	0.00689865
BnaA03g49960D	6.23119	-4.86072	1.65713	-2.92356	0.00346053	0.0129038
BnaA03g50000D	235.807	-2.18829	0.549744	-3.97962	6.90246e-05	0.00040491
BnaA03g50030D	144.644	-3.77739	0.489458	-7.69902	1.37111e-14	3.4823e-13
BnaA03g50050D	9157.91	-9.70403	0.584406	-16.5051	3.37436e-61	2.53119e-58
BnaA03g50100D	289.488	-2.99906	0.382367	-7.83941	4.52656e-15	1.21881e-13
BnaA03g50190D	60.9137	-3.19737	0.716944	-4.44683	8.71456e-06	6.16783e-05
BnaA03g50360D	201.348	2.9609	0.445897	6.63599	3.22334e-11	5.41722e-10
BnaA03g50420D	36.0453	-3.19006	0.920091	-3.4501	0.000560376	0.00264654
BnaA03g50710D	231.167	-2.52877	0.414243	-6.10234	1.04524e-09	1.42084e-08
BnaA03g50770D	565.598	-6.61749	0.476543	-13.7617	4.33388e-43	1.13146e-40
BnaA03g50780D	455.958	-8.82406	0.800793	-10.0161	1.2953e-23	8.32165e-22
BnaA03g50800D	33.4862	-3.9888	0.804391	-4.88502	1.03419e-06	8.71514e-06
BnaA03g50950D	4.89052	-4.50349	1.69888	-2.64039	0.00828095	0.027083
BnaA03g50990D	334.971	2.6331	0.513234	5.12908	2.91158e-07	2.69777e-06
BnaA03g51050D	593.267	5.6331	0.624923	8.98891	2.49703e-19	1.06306e-17
BnaA03g51100D	73.2005	-4.80649	0.665725	-7.11138	1.14891e-12	2.34533e-11
BnaA03g51190D	15.0371	-2.50731	0.97339	-2.55972	0.0104758	0.0329882
BnaA03g51210D	6.32402	-4.92997	1.62692	-3.02299	0.00250287	0.00977133
BnaA03g51240D	77.863	-3.29408	0.688391	-4.77303	1.81474e-06	1.46397e-05
BnaA03g51380D	50.6478	-4.57606	0.761183	-5.90715	3.48074e-09	4.38772e-08
BnaA03g51430D	1398.59	12.3535	1.27867	9.4151	4.72631e-21	2.38145e-19
BnaA03g51590D	221.366	-3.56012	0.413595	-8.59711	8.17457e-18	2.9779e-16
BnaA03g51640D	147.408	7.75551	0.916888	7.48514	7.14697e-14	1.67831e-12
BnaA03g51870D	1142.55	-2.09771	0.415408	-5.04953	4.4289e-07	3.96434e-06
BnaA03g51890D	61.3988	-2.42409	0.591326	-4.09396	4.24067e-05	0.000260771
BnaA03g52000D	226.33	-3.08128	0.633946	-4.85733	1.18982e-06	9.92614e-06
BnaA03g52240D	22.7841	-2.4848	0.813709	-3.04099	0.00235803	0.00928
BnaA03g52290D	50.0417	-2.03101	0.718496	-2.82436	0.00473755	0.0168335
BnaA03g52310D	20.0641	-6.6639	1.43218	-4.65121	3.29999e-06	2.53613e-05
BnaA03g52340D	13.6169	-2.97039	1.08731	-2.70034	0.00692679	0.0232504
BnaA03g52350D	341.153	9.52013	1.04905	7.03874	1.93989e-12	3.85653e-11
BnaA03g52430D	8.31272	-5.34055	1.57633	-3.38224	0.000718983	0.00329907
BnaA03g52460D	15625.2	15.4136	1.18596	11.529	9.41922e-31	1.08349e-28
BnaA03g52510D	14.4962	-2.93154	1.02181	-2.83659	0.00455985	0.016301
BnaA03g52530D	27.5639	2.85133	0.795777	3.56602	0.000362449	0.00179686
BnaA03g52550D	47.5774	-7.76171	1.42003	-5.4628	4.68689e-08	4.94197e-07
BnaA03g52610D	15.6459	-3.97644	1.12674	-3.41185	0.000645229	0.00299784
BnaA03g52680D	34.2253	2.00614	0.736268	2.72138	0.00650103	0.0220464
BnaA03g52770D	256.484	-6.98745	0.623647	-10.843	2.15217e-27	1.87905e-25
BnaA03g52780D	656.142	-10.3111	1.05013	-7.65679	1.90638e-14	4.75301e-13
BnaA03g52940D	474.823	-3.60441	0.63146	-5.70507	1.16294e-08	1.35412e-07
BnaA03g53130D	1979.29	-3.28639	0.350444	-9.37693	6.79243e-21	3.37461e-19
BnaA03g53200D	164.322	-8.47017	1.08042	-6.34048	2.29054e-10	3.39432e-09
BnaA03g53280D	10.1361	5.71393	1.53318	3.72291	0.000196938	0.00104542
BnaA03g53440D	27.9628	-2.02271	0.713194	-2.8309	0.00464168	0.0165348
BnaA03g53450D	18.1824	-2.95747	0.990872	-2.95973	0.00307904	0.0116783
BnaA03g53460D	188.023	-2.82004	0.64447	-4.37314	1.22472e-05	8.41319e-05
BnaA03g53530D	78.8772	-3.90863	0.595924	-6.52417	6.83778e-11	1.09526e-09
BnaA03g53700D	31.7624	-4.04571	0.922815	-4.31498	1.59614e-05	0.000107226
BnaA03g53940D	495.268	-3.44417	0.487284	-7.06499	1.60629e-12	3.22491e-11
BnaA03g54140D	51.661	-7.98245	1.35853	-5.87517	4.22408e-09	5.24529e-08
BnaA03g54220D	171.392	3.80219	0.434855	8.72629	2.63173e-18	1.00982e-16
BnaA03g54270D	14.4652	2.90586	1.15398	2.49431	0.0126202	0.0385445
BnaA03g54320D	92.1355	-2.36736	0.650061	-3.63921	0.000273478	0.0014009
BnaA03g54330D	29.3967	-6.04956	1.2369	-4.26057	2.03908e-05	0.000134173
BnaA03g54340D	75.9908	2.35817	0.531238	4.43502	9.20649e-06	6.48945e-05
BnaA03g54400D	33.5834	-2.91021	0.75618	-3.83105	0.000127597	0.000707587
BnaA03g54420D	46.4853	3.67701	0.668127	5.46468	4.63754e-08	4.89187e-07
BnaA03g54680D	9.06122	-3.60441	1.34704	-2.56846	0.0102152	0.0323091
BnaA03g54700D	8.73092	5.49436	1.55711	3.52392	0.000425218	0.00207368
BnaA04g00140D	3219.52	13.3842	1.24799	10.0827	6.59047e-24	4.36027e-22
BnaA04g00150D	46.9445	3.44492	0.747718	4.58389	4.5641e-06	3.41212e-05
BnaA04g00180D	39.4962	-6.48017	1.17259	-4.72047	2.35296e-06	1.8615e-05
BnaA04g00240D	13.9722	-6.10322	1.49782	-4.07105	4.68022e-05	0.000285493
BnaA04g00260D	47.547	-4.01708	0.690445	-5.7564	8.59274e-09	1.0197e-07
BnaA04g00340D	199.147	3.47961	0.439535	7.90736	2.62902e-15	7.28505e-14
BnaA04g00410D	1456.13	-10.4551	0.779807	-11.9758	4.75625e-33	6.4952e-31
BnaA04g00500D	522.552	-5.6737	0.454196	-12.4439	1.50902e-35	2.39193e-33
BnaA04g00510D	50.1224	-5.63361	0.955285	-5.59468	2.21024e-08	2.45855e-07
BnaA04g00580D	123.879	5.26381	0.606658	8.56921	1.04201e-17	3.72959e-16
BnaA04g00820D	325.939	-3.30123	0.402761	-8.19159	2.57793e-16	7.99638e-15
BnaA04g00890D	26.7074	-2.24423	0.84785	-2.63992	0.00829256	0.0271119
BnaA04g00900D	336.942	7.56209	1.22953	5.92601	3.10387e-09	3.95098e-08
BnaA04g00990D	117.965	5.24103	0.761981	6.79766	1.06332e-11	1.91387e-10
BnaA04g01020D	148.38	5.61271	0.666871	8.30105	1.03191e-16	3.31475e-15
BnaA04g01160D	16.9537	-2.20626	0.877339	-2.50518	0.0122388	0.0375787
BnaA04g01190D	8.8916	-4.31882	1.43214	-2.77436	0.00553099	0.0192194
BnaA04g01260D	60.2406	-8.17574	1.35893	-6.01557	1.79256e-09	2.35031e-08
BnaA04g01320D	94.9975	-2.174	0.517414	-4.19925	2.67798e-05	0.000171839
BnaA04g01340D	17.9777	-6.51095	1.44159	-4.51464	6.34254e-06	4.62103e-05
BnaA04g01370D	65.1108	5.79163	0.808475	6.84971	7.40009e-12	1.36469e-10
BnaA04g01390D	725.292	7.71751	0.505516	14.9815	9.69531e-51	4.00281e-48
BnaA04g01440D	8.7794	5.49962	1.55757	3.52625	0.000421485	0.00205736
BnaA04g01560D	2030.69	12.818	1.26354	9.72806	2.28928e-22	1.3068e-20
BnaA04g01590D	2257.1	6.49662	0.408861	15.8653	1.10164e-56	6.04871e-54
BnaA04g01640D	25.2408	-2.72889	0.781199	-3.47641	0.000508179	0.00242954
BnaA04g01660D	152.485	-5.49585	0.573752	-9.4504	3.37553e-21	1.74034e-19
BnaA04g01680D	34.004	-5.11305	0.939623	-5.18079	2.20944e-07	2.08677e-06
BnaA04g01780D	14.1749	-5.00647	1.3402	-3.36323	0.000770367	0.00350812
BnaA04g01840D	7.17422	-4.98207	1.67808	-2.95637	0.00311286	0.0117781
BnaA04g01860D	7.29997	-3.27371	1.32577	-2.38372	0.0171386	0.0497646
BnaA04g02060D	29.9038	7.29361	1.39483	5.22789	1.71455e-07	1.64562e-06
BnaA04g02080D	13.2397	3.04235	1.15034	2.61176	0.00900786	0.0290265
BnaA04g02100D	35.9122	7.54298	1.38274	5.45419	4.91956e-08	5.16481e-07
BnaA04g02340D	265.162	-2.056	0.370889	-5.54247	2.98242e-08	3.24363e-07
BnaA04g02380D	85.7791	-3.41406	0.562028	-6.05763	1.38139e-09	1.83791e-08
BnaA04g02460D	334.665	2.12081	0.418122	5.07151	3.94668e-07	3.56748e-06
BnaA04g02490D	169.442	-4.18692	0.560502	-7.44831	9.45402e-14	2.19013e-12
BnaA04g02500D	246.769	-3.48109	0.604667	-5.75182	8.82862e-09	1.04559e-07
BnaA04g02710D	49.5745	-6.12944	1.00281	-5.58133	2.38689e-08	2.6407e-07
BnaA04g03000D	70.8049	2.4474	0.527639	4.63336	3.59776e-06	2.74478e-05
BnaA04g03040D	16.9486	-6.42469	1.44955	-4.43013	9.41754e-06	6.62749e-05
BnaA04g03060D	114.88	-2.2891	0.624792	-3.66181	0.000250438	0.00129433
BnaA04g03160D	1890.21	-6.62005	0.50116	-13.1807	1.13269e-39	2.47237e-37
BnaA04g03210D	117.359	6.3559	0.726829	8.39881	4.5103e-17	1.51078e-15
BnaA04g03220D	78.3277	-8.53749	1.34411	-6.35126	2.13563e-10	3.17981e-09
BnaA04g03260D	92.8978	3.35731	0.509947	6.56807	5.09701e-11	8.32705e-10
BnaA04g03320D	10.5897	-5.70705	1.5332	-3.71775	0.000201007	0.00106353
BnaA04g03360D	103.572	2.25372	0.510519	4.41211	1.02367e-05	7.14168e-05
BnaA04g03480D	59.5665	8.21608	1.36394	6.02296	1.71253e-09	2.25037e-08
BnaA04g03550D	10.7919	-5.70838	1.5458	-3.68733	0.000226615	0.00118326
BnaA04g03570D	54.6274	2.53188	0.735609	3.43663	0.000588999	0.00276554
BnaA04g03610D	1629.53	-6.42741	0.357887	-17.9184	8.47524e-72	9.60389e-69
BnaA04g03710D	632.949	-5.85083	1.09905	-5.30803	1.10819e-07	1.0946e-06
BnaA04g03830D	234.187	-2.23488	0.672037	-3.32473	0.00088505	0.00396575
BnaA04g03860D	3883.73	7.51979	0.458188	16.3772	2.78138e-60	1.97511e-57
BnaA04g03910D	43.5616	4.45121	0.793091	5.51754	3.43781e-08	3.70862e-07
BnaA04g04020D	20.6776	3.78242	0.927748	4.00029	6.32646e-05	0.000374462
BnaA04g04220D	8.86791	-5.3756	1.59984	-3.3523	0.000801445	0.00362906
BnaA04g04450D	432.79	-2.87479	0.501919	-5.72603	1.02807e-08	1.20896e-07
BnaA04g04550D	565.528	2.06487	0.358091	5.76589	8.12267e-09	9.67364e-08
BnaA04g04610D	254.575	3.52259	0.399626	8.80644	1.29184e-18	5.14217e-17
BnaA04g04850D	35.2087	3.02296	0.691979	4.34868	1.3696e-05	9.33258e-05
BnaA04g04950D	77.4057	8.58878	1.34372	6.39129	1.64497e-10	2.49173e-09
BnaA04g05000D	166.772	7.91827	0.917073	7.62786	2.3868e-14	5.89331e-13
BnaA04g05040D	10.5527	5.78293	1.52196	3.79605	0.000147018	0.00080341
BnaA04g05090D	7.39028	4.07713	1.4543	2.57589	0.00999824	0.0316935
BnaA04g05160D	466.628	-3.59241	1.07264	-3.34811	0.000813653	0.0036802
BnaA04g05200D	19.5589	3.98597	0.983569	3.95177	7.75758e-05	0.000450705
BnaA04g05270D	210.672	-2.89798	0.516682	-5.60563	2.07499e-08	2.3207e-07
BnaA04g05320D	631.27	-8.69032	0.676697	-12.1192	8.35485e-34	1.18976e-31
BnaA04g05470D	19.9509	-2.32096	0.883872	-2.61648	0.00888411	0.0287006
BnaA04g05520D	97.5225	-2.08112	0.547522	-3.79915	0.000145192	0.000794492
[truncated: 9,443 more rows]

## Sheet: DEGs_leaf
gene	baseMean	log2FoldChange	lfcSE	stat	pvalue	padj
BnaA01g00410D	182.974	-3.14051	0.522911	-5.98417	2.17491e-09	1.77037e-07
BnaA01g00430D	16.7854	-2.54966	0.852906	-2.91424	0.00356559	0.030368
BnaA01g00480D	173.493	-7.6357	0.818517	-7.04	1.92234e-12	3.15957e-10
BnaA01g00520D	67.2812	-5.05171	0.942386	-4.47702	7.56923e-06	0.000222626
BnaA01g00680D	22.2409	3.09473	0.93703	3.23282	0.00122573	0.0135727
BnaA01g00790D	38.3233	-2.99882	0.71637	-4.116	3.85507e-05	0.000853984
BnaA01g00900D	95.4956	-3.19893	0.720358	-4.41272	1.02078e-05	0.000284841
BnaA01g01000D	105.779	5.80643	0.658	7.96212	1.69121e-15	4.66328e-13
BnaA01g01550D	1652.1	-2.68542	0.375113	-7.1574	8.22209e-13	1.45403e-10
BnaA01g01600D	36.2931	3.71785	0.800931	4.49358	7.00355e-06	0.000208475
BnaA01g02060D	48.1033	2.84222	0.706868	3.99087	6.58322e-05	0.00132972
BnaA01g02620D	51.6876	-2.25146	0.610769	-3.66616	0.000246215	0.00382625
BnaA01g02860D	186.137	2.28072	0.753435	3.02689	0.00247082	0.0230896
BnaA01g02910D	220.315	2.7883	0.395442	7.04021	1.91955e-12	3.15957e-10
BnaA01g03020D	58.8063	-2.38034	0.594174	-3.98609	6.71708e-05	0.00135349
BnaA01g03040D	79.3875	-3.38342	0.611543	-5.4641	4.65261e-08	2.6603e-06
BnaA01g03200D	2396.37	7.93621	0.409114	19.0117	1.36401e-80	2.85841e-76
BnaA01g03370D	173.443	-2.25119	0.547642	-4.10523	4.03906e-05	0.000889102
BnaA01g03670D	17.249	2.42296	0.822783	2.90505	0.00367194	0.0310466
BnaA01g03930D	14.8143	-3.70898	1.04127	-3.55154	0.000382979	0.00545966
BnaA01g04650D	1550.77	-2.07129	0.38169	-5.42595	5.76469e-08	3.22576e-06
BnaA01g04750D	1584.78	2.65525	0.333636	7.95722	1.75941e-15	4.81964e-13
BnaA01g04810D	19.2797	-4.50826	0.988901	-4.24608	2.17545e-05	0.000529179
BnaA01g04990D	9.40721	3.38318	1.05582	3.26838	0.00108164	0.0122723
BnaA01g05060D	100.181	-2.58241	0.711311	-3.6177	0.000297229	0.00446184
BnaA01g05240D	547.792	5.71439	0.473784	11.914	1.00118e-32	1.90734e-29
BnaA01g05450D	32.9177	2.35487	0.664222	3.52224	0.000427914	0.00594455
BnaA01g05540D	296.375	2.36744	0.50476	4.68747	2.76607e-06	9.51038e-05
BnaA01g06040D	97.6131	-3.51699	0.522171	-6.65484	2.8361e-11	3.56957e-09
BnaA01g06140D	15.0706	3.62266	0.924281	3.55346	0.000380198	0.00543109
BnaA01g06150D	18.153	4.64114	0.988889	4.36514	1.27041e-05	0.000340445
BnaA01g06180D	3440.26	3.41619	0.328741	10.39	2.75437e-25	2.56536e-22
BnaA01g06190D	1213.9	3.54001	0.32535	10.8743	1.52828e-27	1.8301e-24
BnaA01g06220D	940.713	2.16556	0.321428	6.73627	1.62501e-11	2.1553e-09
BnaA01g06300D	28.0645	2.65052	0.778747	3.36834	0.000756235	0.0093249
BnaA01g06370D	40.952	2.11659	0.645487	3.26722	0.00108609	0.0123028
BnaA01g06790D	16.5166	4.03218	0.959055	3.48837	0.00048597	0.00657032
BnaA01g06800D	1302.59	4.15754	0.353799	11.7392	8.02046e-32	1.46154e-28
BnaA01g07220D	50.3776	2.21307	0.675311	3.2669	0.00108733	0.0123102
BnaA01g07750D	220.049	2.0632	0.656657	3.14094	0.00168405	0.017308
BnaA01g07790D	77.8637	3.7818	0.741198	5.03504	4.77759e-07	2.08364e-05
BnaA01g08080D	38.927	-2.02363	0.645291	-3.11852	0.00181765	0.0183481
BnaA01g08120D	107.179	6.02468	0.677356	7.80354	6.01927e-15	1.55728e-12
BnaA01g08550D	76.5374	2.46817	0.868921	2.84133	0.00449258	0.0363021
BnaA01g08630D	267.026	2.07358	0.558269	3.71273	0.000205034	0.00330989
BnaA01g08900D	248.485	2.05629	0.382249	5.37656	7.59205e-08	4.13781e-06
BnaA01g09270D	1886.57	2.11996	0.43137	4.91421	8.91429e-07	3.54811e-05
BnaA01g09370D	55.0028	2.54025	0.668869	3.78072	0.000156377	0.00263852
BnaA01g09470D	30.7434	2.85237	0.736443	3.82229	0.00013222	0.00231382
BnaA01g09480D	16.0644	2.31726	0.830267	2.75592	0.00585266	0.0440468
BnaA01g09840D	39.9286	2.35882	0.629948	3.72443	0.000195754	0.00319238
BnaA01g09850D	18.9653	2.5181	0.839459	2.95907	0.0030857	0.0272902
BnaA01g10020D	603.723	3.0212	0.64124	4.71021	2.4746e-06	8.64297e-05
BnaA01g10460D	62.7228	3.86859	0.633744	5.97869	2.2494e-09	1.82354e-07
BnaA01g10960D	73.8816	2.11674	0.648034	3.26063	0.00111166	0.0125382
BnaA01g11290D	44.3238	3.3071	0.69389	4.69263	2.69713e-06	9.31156e-05
BnaA01g11480D	17.3376	-3.527	0.935002	-3.40541	0.000660647	0.0084059
BnaA01g11700D	73.5128	-3.14904	0.708044	-4.40833	1.04172e-05	0.00028991
BnaA01g11760D	433.478	-2.98722	0.395274	-7.54761	4.43307e-14	1.00978e-11
BnaA01g11840D	154.171	-2.76657	0.773469	-3.57432	0.000351139	0.00509457
BnaA01g12040D	839.312	3.14888	0.628735	5.00743	5.51625e-07	2.34718e-05
BnaA01g12800D	264.277	2.25357	0.531575	4.23693	2.26599e-05	0.000547389
BnaA01g12950D	7.38782	-2.83015	1.06878	-2.76073	0.00576716	0.0435834
BnaA01g13090D	15.0752	3.08755	0.884592	3.34586	0.00082028	0.00992768
BnaA01g13130D	124.08	3.31673	0.494117	6.67779	2.42565e-11	3.12812e-09
BnaA01g13290D	48.9055	-2.13978	0.756766	-2.81825	0.00482859	0.0381985
BnaA01g13420D	11.7047	2.62558	0.942637	2.71102	0.00670775	0.0484465
BnaA01g13440D	129.567	2.38819	0.442778	5.38484	7.25081e-08	3.96731e-06
BnaA01g13510D	1903.81	3.13939	0.432833	7.2516	4.11884e-13	7.84676e-11
BnaA01g13540D	269.071	-3.63927	0.77177	-4.70529	2.53509e-06	8.82482e-05
BnaA01g13610D	48.3379	3.29734	0.654306	4.96896	6.73141e-07	2.7961e-05
BnaA01g14090D	53.2435	2.30764	0.567718	4.04969	5.12852e-05	0.0010834
BnaA01g14110D	71.8893	3.58638	0.568355	6.22842	4.71151e-10	4.44749e-08
BnaA01g14400D	930.146	2.97518	0.455171	6.53397	6.405e-11	7.31461e-09
BnaA01g14940D	1029.46	3.24064	0.386426	8.3821	5.19898e-17	1.86239e-14
BnaA01g15010D	226.225	3.73452	0.469534	7.92023	2.37068e-15	6.32866e-13
BnaA01g15130D	627.053	3.28152	0.38441	8.52903	1.47581e-17	5.77835e-15
BnaA01g15640D	6710.7	2.00115	0.447714	4.46971	7.83255e-06	0.000228924
BnaA01g15650D	239.056	3.1662	0.414411	7.62379	2.46343e-14	5.93374e-12
BnaA01g15660D	32.4841	2.06207	0.680715	3.01616	0.00256	0.0237016
BnaA01g15910D	21.7566	3.68243	0.910146	3.80099	0.000144118	0.00247395
BnaA01g15990D	9.93306	3.57714	1.04675	3.42403	0.000616995	0.00795431
BnaA01g16090D	420.035	2.15589	0.598236	3.60297	0.000314598	0.00467521
BnaA01g16280D	17.901	2.33049	0.822325	2.80279	0.00506619	0.0395777
BnaA01g16380D	31.4043	2.63547	0.702486	3.71521	0.000203038	0.00328435
BnaA01g16850D	33.6482	2.0154	0.651117	3.08338	0.0020466	0.0200414
BnaA01g17150D	76.8118	-2.7494	0.835905	-3.27778	0.00104629	0.011939
BnaA01g17170D	61.9423	-3.90303	0.944909	-4.02756	5.63578e-05	0.00117108
BnaA01g17490D	154.733	2.09326	0.472795	4.42356	9.70858e-06	0.000272637
BnaA01g17540D	15.5849	-3.34038	1.00957	-3.02312	0.00250181	0.023296
BnaA01g17630D	319.059	2.22492	0.434985	5.11237	3.18144e-07	1.44935e-05
BnaA01g18050D	114.441	4.82486	0.65562	7.14167	9.22051e-13	1.60353e-10
BnaA01g18280D	40.0846	2.53575	0.643381	3.91485	9.04596e-05	0.00171554
BnaA01g18320D	445.127	3.16228	0.61	5.1801	2.21764e-07	1.06145e-05
BnaA01g18330D	38.364	2.06874	0.643597	3.20242	0.00136277	0.0147321
BnaA01g18400D	141.298	-2.66818	0.698334	-3.81211	0.000137787	0.00239028
BnaA01g18580D	57.6283	2.05691	0.621377	3.30248	0.000958339	0.0111788
BnaA01g19350D	99.6533	5.89506	0.69181	7.52237	5.37913e-14	1.18658e-11
BnaA01g19460D	526.838	-2.2445	0.349053	-6.42737	1.29829e-10	1.39166e-08
BnaA01g19470D	34.3779	-4.40182	0.967846	-3.86908	0.000109247	0.00198903
BnaA01g19500D	198.153	-3.30705	0.436822	-7.53792	4.77532e-14	1.07493e-11
BnaA01g19790D	137.156	3.07965	0.449627	6.82482	8.80387e-12	1.24702e-09
BnaA01g20440D	21.8618	-3.35219	0.852615	-3.71914	0.000199903	0.00324616
BnaA01g20830D	10.603	-3.52794	1.0433	-3.35901	0.000782229	0.00956767
BnaA01g20890D	919.909	2.98847	0.365767	8.16698	3.16203e-16	1.02734e-13
BnaA01g20950D	109.496	-2.3518	0.515722	-4.54842	5.40502e-06	0.000167308
BnaA01g22690D	11.1387	-2.58771	1.07288	-2.73182	0.00629859	0.046346
BnaA01g23040D	31.2772	-4.74808	0.901875	-4.18319	2.87451e-05	0.000672346
BnaA01g23070D	139.689	2.25647	0.624081	3.61207	0.000303763	0.0045469
BnaA01g23160D	5791.86	2.54178	0.548531	4.63409	3.58509e-06	0.000117885
BnaA01g23430D	11.1083	-3.29761	1.05695	-3.19026	0.00142143	0.0152171
BnaA01g23490D	53.4376	-3.66368	0.700181	-5.0917	3.54861e-07	1.60442e-05
BnaA01g23510D	1143.97	3.54662	0.490576	7.22565	4.98715e-13	9.37316e-11
BnaA01g23690D	41.9645	-5.70719	0.914802	-5.34679	8.95256e-08	4.74361e-06
BnaA01g24090D	43.1158	-3.8707	0.938295	-3.95715	7.58496e-05	0.00149179
BnaA01g24420D	121.989	-3.41812	0.684311	-4.95658	7.17452e-07	2.95672e-05
BnaA01g24790D	84.7744	3.08709	0.528855	5.80228	6.54173e-09	4.67082e-07
BnaA01g25980D	8.70576	-2.98995	1.06566	-2.91382	0.0035703	0.0303958
BnaA01g26060D	26.0559	-4.00895	0.976228	-3.59036	0.000330217	0.00486127
BnaA01g26250D	44.7232	-2.60432	0.629086	-4.10095	4.11458e-05	0.000903162
BnaA01g26300D	75.236	2.33176	0.58018	4.00897	6.09829e-05	0.00124801
BnaA01g26640D	12.5098	-3.71852	1.03567	-3.53444	0.000408643	0.0057454
BnaA01g26690D	31.2903	-2.08131	0.689609	-2.99794	0.00271815	0.0247605
BnaA01g27080D	9.15796	-2.89242	1.06888	-2.85953	0.00424264	0.0346555
BnaA01g27190D	22.8575	-2.58709	0.845486	-3.00614	0.0026459	0.024247
BnaA01g28090D	14.4338	-3.05302	1.04403	-2.75785	0.00581825	0.0438745
BnaA01g28110D	326.316	3.05211	0.861621	3.55466	0.000378467	0.00541745
BnaA01g28440D	22.7224	4.25189	0.875033	4.25948	2.04899e-05	0.000503975
BnaA01g28710D	186.661	-2.54468	0.411538	-6.1711	6.7817e-10	6.12574e-08
BnaA01g28830D	37.2128	-2.6107	0.822951	-3.14298	0.00167236	0.0172217
BnaA01g28930D	26.2965	-2.83051	1.02814	-2.77803	0.00546899	0.0417896
BnaA01g29130D	182.35	-3.49657	0.656552	-5.29853	1.16737e-07	6.00331e-06
BnaA01g29300D	46.2402	-2.46815	0.828728	-2.95944	0.00308199	0.0272631
BnaA01g29390D	59.5326	-3.80944	0.892773	-4.17008	3.04494e-05	0.00070547
BnaA01g29540D	18.9587	-3.8362	0.979245	-3.38512	0.000711474	0.00889597
BnaA01g29650D	112.556	-2.24944	0.465817	-4.81703	1.45714e-06	5.47728e-05
BnaA01g29870D	112.414	-2.12011	0.708265	-2.98873	0.00280144	0.0253269
BnaA01g30490D	127.571	-4.07443	0.587411	-6.82369	8.8731e-12	1.25215e-09
BnaA01g30720D	6.17821	2.75722	1.07134	2.72621	0.00640664	0.0469104
BnaA01g30830D	20.3636	-4.18524	0.93261	-3.69765	0.000217605	0.00347791
BnaA01g31250D	24.5722	2.19454	0.77281	2.82205	0.00477174	0.0379018
BnaA01g31320D	67.1184	-2.32631	0.560595	-4.1304	3.62138e-05	0.000814744
BnaA01g31950D	40.4134	4.0799	0.779099	5.00351	5.62945e-07	2.39049e-05
BnaA01g31970D	21.779	2.33094	0.763864	3.02304	0.00250247	0.023296
BnaA01g32290D	874.159	2.32769	0.319301	7.28846	3.1351e-13	6.11154e-11
BnaA01g32570D	33.5096	3.24003	0.70186	4.52403	6.06725e-06	0.000184269
BnaA01g33120D	22.3585	2.01499	0.739765	2.70808	0.0067674	0.0487597
BnaA01g33250D	2902.1	2.48916	0.29709	8.37784	5.39063e-17	1.91468e-14
BnaA01g33280D	465.516	2.03623	0.623474	3.26561	0.00109229	0.012353
BnaA01g33290D	96.0492	3.14795	0.492467	6.35553	2.07705e-10	2.09262e-08
BnaA01g33880D	19.2908	-3.50611	1.05645	-3.47577	0.000509396	0.00682757
BnaA01g34170D	544.912	2.4173	0.543889	4.44319	8.86335e-06	0.000253934
BnaA01g34180D	343.953	2.29269	0.591962	3.8716	0.000108121	0.00197196
BnaA01g34480D	37.6672	-2.58995	0.795864	-3.22309	0.00126817	0.0139689
BnaA02g00210D	197.757	-2.06788	0.523909	-3.94336	8.03463e-05	0.00156046
BnaA02g00400D	30.304	3.18038	0.731736	4.25696	2.07222e-05	0.000508495
BnaA02g00490D	35.2766	4.78253	0.857236	4.80711	1.53129e-06	5.73544e-05
BnaA02g00800D	14.5348	-2.99595	0.991599	-2.86038	0.00423129	0.0345966
BnaA02g01000D	581.105	7.30084	0.599855	11.4506	2.33467e-30	4.07711e-27
BnaA02g01140D	74.6792	2.6486	0.585426	4.50702	6.57455e-06	0.000197246
BnaA02g01320D	124.957	7.08958	0.767283	6.01493	1.79968e-09	1.49659e-07
BnaA02g01450D	24.0295	-3.09243	0.826283	-3.6119	0.00030396	0.00454823
BnaA02g01460D	827.741	-2.87911	0.799775	-3.60555	0.000311493	0.00463942
BnaA02g01590D	58.0344	2.46366	0.712999	3.44337	0.000574509	0.00751289
BnaA02g01880D	210.402	-2.03165	0.611016	-3.32262	0.000891763	0.010576
BnaA02g02020D	39.9789	-5.45179	0.940096	-5.09474	3.49222e-07	1.58233e-05
BnaA02g02060D	19.9875	-4.03548	0.939977	-3.61099	0.000305033	0.00456101
BnaA02g02290D	15505.8	2.00343	0.467382	4.28655	1.81471e-05	0.000454349
BnaA02g02530D	14.336	-3.39768	0.994159	-3.06302	0.00219113	0.021075
BnaA02g02560D	135.137	3.68517	0.620329	5.90177	3.59629e-09	2.7861e-07
BnaA02g02770D	54.1831	-2.33426	0.68593	-3.38412	0.000714066	0.00891508
BnaA02g02940D	684.33	2.74712	0.633904	4.33322	1.46941e-05	0.000381811
BnaA02g03450D	1112.57	2.61016	0.351231	7.42981	1.08752e-13	2.33744e-11
BnaA02g03750D	65.9138	-3.46287	0.879569	-3.89218	9.9347e-05	0.00184567
BnaA02g03980D	226.765	-3.49821	0.755433	-4.61966	3.84374e-06	0.000125271
BnaA02g04000D	28.1041	-2.58778	0.855747	-2.99057	0.00278453	0.0252064
BnaA02g04180D	353.92	2.21612	0.517428	4.28132	1.85789e-05	0.000463499
BnaA02g04440D	39.9996	2.14275	0.743992	2.87032	0.00410054	0.0337877
BnaA02g04960D	137.762	5.76263	0.711419	7.53735	4.79603e-14	1.07493e-11
BnaA02g05020D	176.532	-2.33462	0.634583	-3.67447	0.000238346	0.00373302
BnaA02g05180D	25.466	2.74338	0.784657	3.44861	0.000563471	0.00739836
BnaA02g05290D	158.105	-2.69957	0.509593	-5.28247	1.27451e-07	6.46696e-06
BnaA02g05360D	105.864	-2.77301	0.600136	-4.60189	4.18677e-06	0.000134671
BnaA02g05400D	16.0434	2.88024	0.898616	3.11721	0.00182574	0.0183943
BnaA02g05510D	131.509	-3.26841	0.735115	-4.42349	9.7119e-06	0.000272637
BnaA02g05520D	53.3332	-5.58221	0.947077	-5.19559	2.04073e-07	9.8538e-06
BnaA02g06190D	46.335	-3.5888	0.830159	-4.20831	2.57287e-05	0.000611997
BnaA02g06330D	15.8057	-3.35757	0.952856	-3.21475	0.00130557	0.0142609
BnaA02g06340D	10.603	-3.52794	1.0433	-3.35901	0.000782229	0.00956767
BnaA02g06580D	40.3118	4.59332	0.759982	5.53872	3.04689e-08	1.85883e-06
BnaA02g07070D	29.8968	-2.48257	0.732464	-3.34747	0.000815528	0.00989758
BnaA02g07880D	52.9404	-4.77142	1.01123	-4.57265	4.81601e-06	0.000152454
BnaA02g07900D	97.8103	-6.33299	0.914609	-5.84365	5.107e-09	3.78615e-07
BnaA02g08010D	55.6503	-2.43954	0.688843	-3.52278	0.000427043	0.00593613
BnaA02g08090D	1002.28	2.78439	0.491572	5.66285	1.48883e-08	9.79586e-07
BnaA02g08400D	27.2007	-3.01408	0.881828	-3.33834	0.00084282	0.0101071
BnaA02g08480D	186.834	-3.35125	0.734386	-4.54662	5.45135e-06	0.000168369
BnaA02g08610D	112.583	2.21138	0.446235	4.94814	7.49253e-07	3.06368e-05
BnaA02g09030D	19.2981	-2.66583	0.964915	-2.72773	0.00637716	0.0467643
BnaA02g09600D	340.006	2.17293	0.511998	4.24242	2.21119e-05	0.000536626
BnaA02g09800D	39.2413	2.04558	0.748328	2.72551	0.00642015	0.046968
BnaA02g10290D	39.1882	2.55602	0.840053	3.02853	0.00245746	0.0230264
BnaA02g10980D	12.2813	-3.62558	1.04129	-3.45711	0.000546003	0.00721213
BnaA02g10990D	36.2981	2.16578	0.676728	3.1866	0.00143957	0.0153447
BnaA02g11130D	7.64743	2.66464	1.07275	2.73307	0.00627464	0.0462428
BnaA02g11200D	24.9104	4.35229	0.87354	4.3571	1.31797e-05	0.000351169
BnaA02g11250D	32.0686	2.04925	0.726368	2.81022	0.00495075	0.0388948
BnaA02g11510D	33.4303	3.61083	0.725182	4.82137	1.42575e-06	5.36893e-05
BnaA02g11920D	45.4342	-4.73557	1.00879	-4.51246	6.40812e-06	0.000192943
BnaA02g12230D	21.3238	-2.62847	0.892542	-2.88365	0.00393093	0.0327086
BnaA02g12410D	55.5681	-3.15764	1.03199	-3.16369	0.00155783	0.0162903
BnaA02g12540D	210.341	-2.05972	0.524857	-3.92088	8.82262e-05	0.00168308
BnaA02g12700D	16.7832	-3.63806	0.993148	-3.21673	0.00129661	0.0141964
BnaA02g12740D	9.96501	-3.08165	1.01343	-2.73714	0.00619761	0.0458363
BnaA02g13370D	63.4452	-2.87128	0.754806	-3.77548	0.000159701	0.00268487
BnaA02g13400D	63.7564	-2.4128	0.552811	-4.341	1.41833e-05	0.0003713
BnaA02g13460D	352.123	-3.19317	0.365279	-8.72313	2.70618e-18	1.21958e-15
BnaA02g13620D	16.6091	2.72898	0.887747	3.0113	0.00260135	0.0239885
BnaA02g14340D	2255.56	2.97682	0.652873	4.561	5.09094e-06	0.000160069
BnaA02g14540D	25.1259	2.40354	0.847921	2.81341	0.00490197	0.0386259
BnaA02g14980D	22.4455	2.52654	0.810833	3.08071	0.0020651	0.0201754
BnaA02g15200D	29.6115	-3.08396	0.848817	-3.54072	0.000399034	0.00563867
BnaA02g15230D	35.1014	-2.01188	0.688474	-2.90723	0.00364645	0.030881
BnaA02g15280D	7.62116	-2.75125	1.07073	-2.71372	0.00665321	0.0481552
BnaA02g15390D	9.98185	3.50067	1.05098	3.36733	0.000758985	0.00935364
BnaA02g15460D	49.1297	2.73685	0.666281	4.08047	4.4945e-05	0.00097298
BnaA02g16740D	176.506	2.28855	0.443987	5.14931	2.61445e-07	1.22603e-05
BnaA02g17260D	40.6901	-2.89912	0.808126	-3.53895	0.000401728	0.0056691
BnaA02g17630D	12.2909	2.98878	0.937203	3.0412	0.00235638	0.0223137
BnaA02g17680D	13.5191	-3.02652	0.990029	-2.85239	0.00433915	0.0352994
BnaA02g17690D	34.7845	2.51367	0.661006	3.77381	0.000160776	0.00270079
BnaA02g17710D	34.6567	2.36854	0.657886	3.57764	0.000346704	0.00504375
BnaA02g18050D	148.88	-3.82476	0.940152	-4.09103	4.29462e-05	0.000935044
BnaA02g18200D	49.1794	4.00536	0.704051	5.50726	3.64456e-08	2.16055e-06
BnaA02g18220D	7.65175	3.11937	1.06361	3.0324	0.0024262	0.0227895
BnaA02g18480D	69.9931	2.1299	0.546565	3.88851	0.000100863	0.00186968
BnaA02g19550D	35.2076	-3.37801	0.736342	-4.44098	8.95499e-06	0.000255746
BnaA02g19770D	641.52	3.20841	0.657789	4.87657	1.07948e-06	4.20867e-05
BnaA02g20350D	20.8569	-2.64539	0.812481	-3.18711	0.00143704	0.0153294
BnaA02g20360D	22.1314	-2.72269	0.81199	-3.27993	0.00103834	0.0118709
BnaA02g20690D	19.2556	-4.51542	0.988129	-4.25287	2.11047e-05	0.000516671
BnaA02g21020D	142.579	-7.36442	0.831264	-6.80557	1.00649e-11	1.41084e-09
BnaA02g21140D	197.292	-7.13505	0.887135	-6.51885	7.08484e-11	8.00377e-09
BnaA02g21150D	31.3533	-4.62315	1.00314	-4.3663	1.26369e-05	0.000339076
BnaA02g21180D	1667.09	-2.28981	0.407444	-5.6192	1.91846e-08	1.23134e-06
BnaA02g21230D	87.1196	-3.14452	0.538232	-5.7896	7.05538e-09	4.9866e-07
BnaA02g21340D	65.9809	3.38584	0.578203	5.79005	7.03653e-09	4.98167e-07
BnaA02g21730D	10.5216	-2.80937	0.969037	-2.71647	0.00659817	0.0479277
BnaA02g22030D	25.3429	-3.56147	0.82057	-4.08797	4.35165e-05	0.000945988
BnaA02g23030D	39.087	2.53831	0.662257	3.80691	0.000140716	0.00243017
BnaA02g23510D	53.6075	2.44236	0.574686	4.23121	2.32438e-05	0.000560203
BnaA02g23870D	132.812	2.37294	0.497224	4.76537	1.88506e-06	6.82267e-05
BnaA02g24090D	14.4988	-4.05226	1.01573	-3.83	0.000128145	0.00225949
BnaA02g24110D	110.648	6.90045	0.778701	5.85762	4.69537e-09	3.53308e-07
BnaA02g24390D	61.8917	2.55773	0.546522	4.65927	3.17326e-06	0.000106569
BnaA02g24560D	42.6633	2.57491	0.734312	3.48608	0.00049015	0.00661402
BnaA02g24690D	1152.31	2.29708	0.375878	6.11039	9.93853e-10	8.73258e-08
BnaA02g25110D	129.118	-3.01179	0.627726	-4.7794	1.75822e-06	6.43025e-05
BnaA02g25160D	28.103	2.6284	0.965348	2.71942	0.00653968	0.0476266
BnaA02g25930D	3906.45	-3.19147	0.460173	-6.93459	4.07411e-12	6.25472e-10
BnaA02g25940D	14.3761	-2.80736	1.00665	-2.70218	0.00688869	0.0493621
BnaA02g26000D	537.753	-2.79967	0.481288	-5.81238	6.15924e-09	4.4508e-07
BnaA02g26140D	30.7388	-2.51918	0.913617	-2.74321	0.00608412	0.0452392
BnaA02g26490D	10.7409	3.7208	1.04013	3.54806	0.000388079	0.00551923
BnaA02g26500D	44.493	5.20475	0.817379	5.33277	9.67252e-08	5.10582e-06
BnaA02g26640D	97.7979	2.17957	0.580882	3.74657	0.000179266	0.00295337
BnaA02g26670D	16.3692	2.48709	0.833544	2.93671	0.00331715	0.0287605
BnaA02g27130D	75.7168	-3.39145	0.6036	-5.5406	3.01437e-08	1.84473e-06
BnaA02g27170D	113.541	-2.58148	0.511887	-5.02515	5.0303e-07	2.17537e-05
BnaA02g27280D	230.299	-5.71725	0.916219	-5.8107	6.22121e-09	4.48574e-07
BnaA02g27290D	70.1804	-3.71201	1.01473	-3.71596	0.000202437	0.00327588
BnaA02g27300D	63.1543	-3.79995	0.728471	-5.08549	3.66676e-07	1.64894e-05
BnaA02g27340D	85.9988	2.17804	0.532817	4.08023	4.49917e-05	0.00097301
BnaA02g27500D	164.018	-2.07382	0.436364	-4.74633	2.07137e-06	7.39281e-05
BnaA02g27660D	28.3599	-4.11835	0.880133	-4.16553	3.1063e-05	0.000717703
BnaA02g27670D	109.42	-3.28697	0.536737	-6.07589	1.23304e-09	1.05039e-07
BnaA02g27870D	1253.87	-2.10437	0.312852	-6.72531	1.75214e-11	2.31658e-09
BnaA02g27900D	72.9035	-2.7241	1.01732	-2.74292	0.00608964	0.0452694
BnaA02g28080D	67.4674	-3.01673	0.610066	-4.8968	9.74099e-07	3.84068e-05
BnaA02g28200D	672.543	-2.24038	0.436187	-5.13451	2.82881e-07	1.30862e-05
BnaA02g28330D	91.8771	2.71127	0.683606	3.95488	7.65739e-05	0.00150181
BnaA02g28650D	21.8506	-3.65942	1.01393	-3.25688	0.00112642	0.0126638
BnaA02g28960D	12.871	-3.07103	0.954239	-2.98473	0.00283833	0.0255641
BnaA02g29770D	71.474	-2.04441	0.542949	-3.75519	0.000173212	0.00287171
BnaA02g29990D	35.011	-4.81133	0.993027	-4.52726	5.97533e-06	0.000182269
BnaA02g30580D	7.3655	3.05896	1.06529	2.98037	0.00287897	0.0258159
BnaA02g31000D	80.1679	-2.02938	0.566227	-3.57421	0.000351287	0.00509457
BnaA02g31900D	483.683	2.70416	0.531324	5.08683	3.64103e-07	1.64266e-05
BnaA02g31910D	1226.65	-2.23806	0.442637	-5.05533	4.29646e-07	1.89951e-05
BnaA02g31980D	31.2102	3.96771	0.784374	4.78747	1.68901e-06	6.20682e-05
BnaA02g32040D	13.7988	-3.85613	1.02922	-3.65835	0.000253841	0.00392728
BnaA02g32440D	136.241	4.38816	0.581899	7.42898	1.09435e-13	2.34012e-11
BnaA02g33200D	89.7579	-3.02686	0.726779	-4.14129	3.4536e-05	0.000785815
BnaA02g33320D	7.54387	-2.86387	1.06806	-2.78979	0.00527427	0.0407475
BnaA02g33520D	81.3519	2.67304	0.618871	4.3043	1.67513e-05	0.000424988
BnaA02g33530D	469.168	-2.38226	0.522276	-4.55886	5.14323e-06	0.00016135
BnaA02g33580D	24.7513	-3.38097	0.940254	-3.43568	0.000591063	0.00768621
BnaA02g33650D	19.8571	-3.0048	0.913728	-3.17318	0.0015078	0.0158622
BnaA02g33880D	23.7638	-4.36073	0.926204	-3.84639	0.000119871	0.00213971
BnaA02g33930D	47.8976	-4.93068	0.849592	-4.92193	8.56964e-07	3.44033e-05
BnaA02g34260D	135.498	-3.5834	0.820326	-4.34309	1.4049e-05	0.000368013
BnaA02g34300D	17.3729	2.74256	0.902108	2.9826	0.00285808	0.0256835
BnaA02g34400D	22.529	-2.60844	0.944731	-2.72607	0.00640942	0.0469173
BnaA02g34710D	19.529	-3.26855	0.925591	-3.33618	0.000849384	0.0101678
BnaA03g00140D	137.038	4.51369	0.589476	7.52732	5.17939e-14	1.14856e-11
BnaA03g00600D	7.5097	3.05571	1.06555	2.98291	0.00285523	0.0256834
BnaA03g00700D	18.4417	3.91484	0.904794	3.8681	0.000109685	0.00199527
BnaA03g00830D	103.651	3.15594	0.532043	5.901	3.61294e-09	2.78996e-07
BnaA03g01350D	134.367	-2.05179	0.485212	-4.22295	2.41131e-05	0.000578162
BnaA03g02250D	22.522	-2.82429	0.790588	-3.47959	0.000502188	0.00674174
BnaA03g02400D	10.9834	-2.84605	0.97006	-2.74913	0.00597541	0.0446738
BnaA03g02610D	49.079	2.52159	0.612163	4.09742	4.17779e-05	0.000914835
BnaA03g02640D	548.226	-3.19376	0.401744	-7.93962	2.02804e-15	5.51943e-13
BnaA03g02650D	648.236	-2.31285	0.324231	-7.13031	1.0014e-12	1.71309e-10
BnaA03g02830D	254.209	2.03065	0.366465	5.53842	3.05205e-08	1.85927e-06
BnaA03g02950D	222.208	3.1683	0.413576	7.64264	2.12812e-14	5.18569e-12
BnaA03g03760D	15.6738	3.13389	0.959711	3.13501	0.00171845	0.0175925
BnaA03g03850D	25.3745	-2.60392	0.760131	-3.36478	0.000766053	0.00941825
BnaA03g03890D	10.1239	3.57117	1.0475	3.42288	0.000619609	0.00797575
BnaA03g04040D	26.604	-4.57447	0.906049	-4.03877	5.37329e-05	0.00112748
BnaA03g04160D	14.5597	-3.45511	0.987916	-3.11118	0.00186338	0.0186616
BnaA03g04180D	63.3626	2.9901	0.618722	4.79852	1.5984e-06	5.91804e-05
BnaA03g04190D	50.796	-2.14391	0.686697	-3.10708	0.00188946	0.0188326
BnaA03g04240D	473.491	-2.62943	0.719378	-3.65503	0.000257149	0.00396674
BnaA03g04290D	27.2966	-3.79873	0.878913	-4.00139	6.29719e-05	0.00128245
BnaA03g04310D	161.62	-3.97004	0.565753	-6.94496	3.78567e-12	5.85479e-10
BnaA03g04410D	192.16	-3.68458	0.469932	-7.78903	6.75236e-15	1.72564e-12
BnaA03g04470D	201.128	-2.34517	0.51788	-4.52317	6.09188e-06	0.000184615
BnaA03g04590D	42.8769	2.83153	0.644657	4.35237	1.34673e-05	0.000356367
BnaA03g04730D	80.2442	-2.76899	0.6084	-4.52318	6.09176e-06	0.000184615
BnaA03g05370D	7.60296	3.10992	1.06392	3.02408	0.00249393	0.0232486
BnaA03g05550D	27.67	-5.07306	0.954027	-4.76483	1.89015e-06	6.83519e-05
BnaA03g05790D	54.9086	2.4447	0.56422	4.31405	1.60293e-05	0.000409149
BnaA03g05810D	241.667	2.71391	0.571528	4.7435	2.10059e-06	7.47316e-05
BnaA03g05950D	186.123	2.72843	0.400571	6.79962	1.04897e-11	1.46061e-09
BnaA03g06360D	73.0424	6.77054	0.862353	6.29172	3.13971e-10	3.05317e-08
BnaA03g06450D	322.009	2.00154	0.516306	3.87543	0.000106437	0.00195058
BnaA03g06650D	29.4112	-5.17431	0.947354	-4.85862	1.1821e-06	4.56086e-05
BnaA03g06910D	392.269	-3.91997	0.48775	-8.00588	1.18612e-15	3.35896e-13
BnaA03g06930D	126.834	-2.11826	0.438317	-4.82399	1.40713e-06	5.3179e-05
BnaA03g07720D	23.3414	2.12348	0.773743	2.72755	0.00638059	0.0467768
BnaA03g08050D	59.6106	5.28738	0.784018	5.93744	2.89512e-09	2.27655e-07
BnaA03g08270D	456.5	2.01216	0.463084	4.34411	1.39843e-05	0.000366975
BnaA03g08360D	26.982	2.14404	0.724136	2.94395	0.00324053	0.0282208
BnaA03g08390D	153.284	2.02186	0.545733	3.70214	0.000213793	0.0034305
BnaA03g08520D	157.568	3.5637	0.511485	6.93145	4.16553e-12	6.37174e-10
BnaA03g08700D	59.0206	-2.17796	0.617207	-3.51441	0.000440729	0.00609176
BnaA03g09400D	45.7532	-2.31482	0.622884	-3.69217	0.000222346	0.00352591
BnaA03g09430D	72.8781	-2.36272	0.714933	-3.29304	0.000991107	0.0114762
BnaA03g09450D	11.9588	-3.31353	1.00098	-2.93683	0.00331582	0.0287605
BnaA03g09460D	47.1353	-3.59363	0.751966	-4.65115	3.30084e-06	0.000109972
BnaA03g09490D	136.114	-4.05411	0.999345	-4.16319	3.13839e-05	0.000724717
BnaA03g09710D	7.84257	3.11763	1.06393	3.03708	0.00238884	0.0225193
BnaA03g09750D	70.8126	-2.23158	0.529017	-4.20235	2.64163e-05	0.000625514
BnaA03g09790D	119.342	-2.10999	0.600493	-3.50797	0.000451542	0.00619533
BnaA03g09810D	107.181	2.34015	0.801449	2.91906	0.00351092	0.030006
BnaA03g09820D	71.5655	2.41156	0.621607	3.86857	0.000109476	0.00199233
BnaA03g10070D	57.2311	5.57649	0.794398	5.76647	8.09487e-09	5.70205e-07
BnaA03g10160D	75.2266	-3.66678	0.675943	-5.33057	9.7907e-08	5.14865e-06
BnaA03g10550D	340.062	-2.44524	0.701855	-3.48283	0.000496141	0.00667982
BnaA03g10740D	23.9414	-2.23441	0.783686	-2.81898	0.00481767	0.0381337
BnaA03g10950D	8.22941	-3.0986	1.0608	-2.98122	0.00287103	0.0257696
BnaA03g11130D	71.676	-2.75386	0.812559	-3.37385	0.00074126	0.00916992
BnaA03g11320D	29.3398	-2.09457	0.699696	-2.97056	0.00297257	0.0264852
BnaA03g11330D	26.2441	2.64234	0.727648	3.58748	0.000333894	0.00489836
BnaA03g11400D	42.8238	4.2609	0.737311	5.48074	4.23558e-08	2.46558e-06
BnaA03g11410D	491.237	-4.43755	0.80155	-5.53775	3.06385e-08	1.86374e-06
BnaA03g11480D	14.5631	-2.80496	1.07217	-2.95731	0.00310338	0.0274056
BnaA03g11600D	56.9102	-2.80333	0.972538	-2.90556	0.00366598	0.0310151
BnaA03g11970D	15.596	-3.35151	1.00837	-3.03177	0.0024312	0.0228226
BnaA03g11980D	8.82799	-3.0547	1.06358	-2.96344	0.00304223	0.0269968
BnaA03g12050D	55.4592	3.68975	0.639635	5.65732	1.53759e-08	1.00693e-06
BnaA03g12120D	16.6728	-4.27951	1.00252	-4.03687	5.4169e-05	0.00113403
BnaA03g12150D	138.566	7.6235	0.82344	7.0269	2.11165e-12	3.4315e-10
BnaA03g12660D	12.8461	-2.47091	1.0721	-2.71807	0.00656636	0.0477545
BnaA03g12810D	90.3704	-2.12303	0.663208	-3.19583	0.0013943	0.0150075
BnaA03g13140D	45.4613	-3.37499	0.690406	-4.77217	1.82252e-06	6.63643e-05
BnaA03g13170D	44.475	-3.04804	0.997361	-3.05414	0.00225705	0.0215631
BnaA03g13550D	113.986	3.02002	0.843516	3.57919	0.000344664	0.00502804
BnaA03g13590D	45.3029	3.13184	0.706825	4.37855	1.19473e-05	0.000324101
BnaA03g13600D	77.9892	-2.39568	0.740213	-3.22504	0.00125955	0.0138958
BnaA03g14020D	61.4397	2.42291	0.552362	4.37005	1.24218e-05	0.000335022
BnaA03g14050D	23.1183	4.60694	0.914281	3.96219	7.42652e-05	0.00146544
BnaA03g14430D	108.358	-2.28026	0.463466	-4.90737	9.23058e-07	3.65664e-05
BnaA03g14640D	21.2832	-4.55333	0.990248	-4.28525	1.82533e-05	0.000456737
BnaA03g14730D	226.509	2.69962	0.383584	7.02839	2.08937e-12	3.42068e-10
BnaA03g15270D	15.4255	-2.81235	0.882775	-3.06306	0.00219086	0.021075
BnaA03g15360D	71.0244	2.64779	0.543362	4.85244	1.21954e-06	4.6936e-05
BnaA03g15390D	72.0462	3.86606	0.64034	5.93337	2.96783e-09	2.32067e-07
BnaA03g15610D	8783.48	-2.94887	0.585047	-5.04121	4.62608e-07	2.02389e-05
BnaA03g16360D	24.563	2.259	0.72472	3.0933	0.00197945	0.0195621
BnaA03g16670D	60.4866	-2.36066	0.588564	-3.9896	6.61836e-05	0.00133488
BnaA03g16760D	46.9215	-3.72908	0.730175	-4.93394	8.05863e-07	3.26647e-05
BnaA03g16830D	56.8631	-2.87334	0.813296	-3.50795	0.000451582	0.00619533
BnaA03g17030D	199.716	-2.47854	0.531826	-4.65357	3.2623e-06	0.000109018
BnaA03g17060D	35.8841	-2.36315	0.765229	-3.06505	0.00217633	0.0209852
BnaA03g17410D	150.177	-4.40926	0.68374	-6.33294	2.40526e-10	2.36642e-08
BnaA03g17430D	16.6795	4.49286	0.998026	4.23122	2.32428e-05	0.000560203
BnaA03g17450D	71.0536	2.59917	0.671534	3.8572	0.000114693	0.00206841
BnaA03g17570D	67.5244	2.34801	0.561672	4.16768	3.07713e-05	0.00071214
BnaA03g17960D	228.695	-3.19444	0.455521	-6.98964	2.75585e-12	4.3586e-10
BnaA03g17970D	265.098	-2.36718	0.410571	-5.75939	8.44179e-09	5.91659e-07
BnaA03g18300D	237.953	3.71718	0.39978	9.2602	2.04045e-20	1.0964e-17
BnaA03g18530D	30.7051	3.45998	0.818906	4.10805	3.9901e-05	0.000880173
BnaA03g19030D	29.652	-3.27846	0.962858	-3.30773	0.000940564	0.0110176
BnaA03g19090D	119.375	3.26475	0.487692	6.66016	2.73529e-11	3.46349e-09
BnaA03g19270D	74.8787	-6.41318	0.883171	-5.96106	2.50613e-09	2.00071e-07
BnaA03g19450D	558.928	-2.06603	0.547852	-3.77008	0.000163193	0.00273372
BnaA03g19660D	37.2784	2.22566	0.711968	3.11267	0.00185402	0.0185988
BnaA03g19680D	14.0017	-2.5294	1.07249	-2.78497	0.00535332	0.0411609
BnaA03g19850D	235.14	-4.90456	0.477145	-10.0757	7.07561e-24	5.81477e-21
BnaA03g19960D	54.3942	-2.65835	0.838202	-3.16065	0.00157416	0.016412
BnaA03g20190D	59.3052	2.25219	0.548672	4.09226	4.27194e-05	0.000933016
BnaA03g20290D	392.977	2.18412	0.34954	6.24611	4.2081e-10	4.00841e-08
BnaA03g20490D	57.6426	3.91699	0.658596	5.80524	6.42721e-09	4.61262e-07
BnaA03g20510D	15.0829	-3.95541	1.02511	-3.74935	0.000177295	0.00292745
BnaA03g20610D	15.0984	2.86981	0.875022	3.18104	0.00146745	0.0155549
BnaA03g20620D	30.9072	4.13465	0.808327	4.76954	1.84645e-06	6.71192e-05
BnaA03g20670D	138.156	-2.4811	0.512747	-4.82621	1.39155e-06	5.27328e-05
BnaA03g21100D	655.394	4.54216	0.71817	6.31724	2.66283e-10	2.60758e-08
BnaA03g21140D	93.6903	-2.49712	0.748813	-3.32602	0.000880941	0.0104787
BnaA03g21190D	35.6828	-3.83285	0.783024	-4.63262	3.61075e-06	0.000118554
BnaA03g21340D	44.3237	2.93029	0.765799	3.79295	0.00014887	0.0025363
BnaA03g21640D	58.6183	-3.22647	0.832047	-3.84207	0.000122	0.00217031
BnaA03g21840D	321.69	2.75913	0.389634	7.07445	1.50043e-12	2.51234e-10
BnaA03g21970D	1603.26	-3.6452	0.599836	-6.07529	1.23767e-09	1.05219e-07
BnaA03g22010D	20.6682	-3.22238	0.856967	-3.58132	0.000341868	0.00499073
BnaA03g22180D	83.7185	2.90191	0.536173	5.38621	7.19575e-08	3.94233e-06
BnaA03g22470D	53.0246	-2.80909	0.726449	-3.82861	0.00012887	0.00227133
BnaA03g22520D	11.8395	3.23794	0.95667	3.13337	0.00172809	0.0176653
BnaA03g22690D	22.555	-3.18765	0.81924	-3.72937	0.000191956	0.00314023
BnaA03g22720D	15.5143	-3.03147	1.00899	-2.83907	0.00452449	0.0364903
BnaA03g22980D	272.06	-3.73659	0.869842	-4.30923	1.63823e-05	0.000416887
BnaA03g23510D	11.497	-3.30491	0.997656	-2.92932	0.00339704	0.0292611
BnaA03g24210D	10.6268	3.36265	1.00323	2.93983	0.00328395	0.0285258
BnaA03g24840D	68.2926	-2.03593	0.630995	-3.21738	0.00129368	0.0141865
BnaA03g24890D	16.0439	4.03105	0.954958	3.48802	0.000486618	0.00657636
BnaA03g24900D	16.5161	-3.80231	0.966858	-3.35898	0.000782315	0.00956767
BnaA03g25580D	55.5227	-4.57539	0.847029	-4.96596	6.83627e-07	2.83404e-05
BnaA03g25760D	49.1688	2.78536	0.624568	4.42702	9.55451e-06	0.0002693
BnaA03g25790D	154.213	2.25048	0.427161	5.26245	1.42148e-07	7.135e-06
BnaA03g25830D	19.2796	3.69416	0.8746	3.92329	8.73473e-05	0.00167018
BnaA03g25850D	34.3505	4.44034	0.84204	4.80071	1.58101e-06	5.87414e-05
BnaA03g25870D	13.992	-2.92182	1.07057	-3.0115	0.00259958	0.0239827
BnaA03g26620D	12.246	-2.65794	1.07283	-2.8076	0.00499116	0.0391373
BnaA03g26670D	32.2972	2.69384	0.752155	3.54686	0.000389859	0.00554078
BnaA03g26770D	47.3494	-2.07429	0.682109	-3.02821	0.00246009	0.0230284
BnaA03g26790D	91.6754	-2.75177	0.631617	-4.33621	1.4496e-05	0.00037807
BnaA03g26810D	403.01	2.40623	0.621164	3.87271	0.000107632	0.00196476
BnaA03g27030D	122.876	-2.81169	0.655898	-4.27133	1.94309e-05	0.000481034
BnaA03g27090D	32.8783	-3.91091	0.960823	-3.76183	0.000168675	0.00280982
BnaA03g27360D	69.2488	2.51373	0.576561	4.34399	1.39919e-05	0.000366975
BnaA03g27520D	515.394	-2.63607	0.589455	-4.46945	7.84214e-06	0.000229045
BnaA03g27860D	22.6994	2.87922	0.94991	2.99445	0.00274944	0.0249641
BnaA03g28140D	69.1765	2.80993	0.545062	5.12761	2.93451e-07	1.35304e-05
BnaA03g28370D	7960.87	-10.9281	0.559533	-17.0475	3.64941e-65	2.54924e-61
BnaA03g28700D	55.3204	2.14187	0.699466	3.05477	0.0022523	0.0215323
BnaA03g28770D	322.118	-3.12396	0.550931	-5.66091	1.50575e-08	9.87618e-07
BnaA03g29230D	292.189	4.79374	0.420838	11.276	1.72506e-29	2.58217e-26
BnaA03g29440D	142.731	-2.37631	0.610103	-3.8872	0.000101405	0.00187725
BnaA03g30240D	44.4321	-2.22672	0.646337	-3.42381	0.000617505	0.00795844
BnaA03g30400D	269.589	5.42503	0.474542	11.1908	4.52158e-29	6.53477e-26
BnaA03g31090D	245.155	5.12694	0.510359	9.87555	5.31396e-23	3.71198e-20
BnaA03g31290D	2100.64	-4.79107	0.423933	-11.2845	1.56578e-29	2.43056e-26
BnaA03g31490D	186.795	-2.78994	0.41084	-6.77287	1.26252e-11	1.72361e-09
BnaA03g31600D	2177.14	3.09775	0.431374	7.17992	6.97529e-13	1.27663e-10
BnaA03g31980D	10.5216	-2.80937	0.969037	-2.71647	0.00659817	0.0479277
BnaA03g32320D	338.664	-2.81927	0.545416	-5.16159	2.44863e-07	1.16094e-05
BnaA03g32350D	132.475	3.80681	0.498526	7.57224	3.66841e-14	8.44782e-12
BnaA03g32410D	64.8973	3.3502	0.830086	4.00533	6.19301e-05	0.0012643
BnaA03g32440D	4158.03	2.09003	0.500332	4.17731	2.94975e-05	0.000685732
BnaA03g32490D	23.9701	-2.36041	0.815679	-2.85381	0.00431982	0.0351667
BnaA03g32640D	353.998	-2.26555	0.513902	-4.4057	1.05443e-05	0.000292477
BnaA03g32960D	631.385	-5.24768	0.773215	-6.75722	1.40668e-11	1.88965e-09
BnaA03g32990D	21.6351	2.5216	0.7832	3.18032	0.00147111	0.0155857
BnaA03g34290D	55.1671	-3.4591	0.75772	-4.47726	7.5608e-06	0.000222626
BnaA03g34340D	45.5288	3.03387	0.671571	4.46895	7.8604e-06	0.000229419
BnaA03g34430D	56.2974	3.46253	0.628056	5.43324	5.53398e-08	3.10495e-06
BnaA03g34500D	11.8675	2.93914	0.939857	2.98719	0.00281556	0.0254268
BnaA03g34700D	35.426	-4.68593	0.917216	-4.16233	3.15013e-05	0.000727028
BnaA03g34940D	169.606	-2.15	0.475139	-4.51966	6.1938e-06	0.000187298
BnaA03g35100D	79.1307	2.00391	0.642915	3.11283	0.001853	0.0185975
BnaA03g35260D	508.033	2.66154	0.478166	5.56344	2.64505e-08	1.6448e-06
BnaA03g35310D	32.944	-2.52306	0.813749	-3.06704	0.00216192	0.0208924
BnaA03g35830D	27.1584	2.76349	0.752959	3.62128	0.000293152	0.00440696
BnaA03g35870D	75.9264	6.37828	0.8021	5.43476	5.48694e-08	3.08269e-06
BnaA03g35880D	907.265	4.01296	0.438986	9.1302	6.8374e-20	3.45264e-17
BnaA03g36440D	540.073	-2.64853	0.354828	-7.45888	8.72626e-14	1.895e-11
BnaA03g36450D	434.47	-2.18072	0.474098	-4.59786	4.26854e-06	0.00013709
BnaA03g36540D	119.53	-6.33563	0.927996	-5.84345	5.113e-09	3.78615e-07
BnaA03g36810D	293.425	3.01122	0.57562	5.22479	1.74356e-07	8.52021e-06
BnaA03g36910D	60.7544	-2.73388	0.768349	-3.53504	0.000407716	0.00573621
BnaA03g36980D	96.5987	-2.50927	0.691766	-3.61708	0.000297944	0.00446938
BnaA03g37120D	1102.8	3.16417	0.57337	5.51735	3.4414e-08	2.06052e-06
BnaA03g37330D	10.9489	-3.08001	1.06518	-3.03477	0.00240723	0.0226621
BnaA03g37360D	642.177	2.54746	0.549935	4.63108	3.63757e-06	0.000119294
BnaA03g37790D	11.7165	-3.64552	1.03855	-3.46714	0.000526029	0.00701647
BnaA03g37820D	76.677	-2.6938	0.726598	-3.68702	0.000226899	0.00357781
BnaA03g38080D	1832.12	2.14059	0.302574	7.07407	1.50457e-12	2.51234e-10
BnaA03g38630D	6719.67	-2.49349	0.430614	-5.79044	7.02027e-09	4.98141e-07
BnaA03g38880D	56.2283	-2.77424	0.905817	-3.05267	0.00226819	0.0216498
BnaA03g38940D	430.133	-3.39615	0.6477	-5.23612	1.63987e-07	8.09544e-06
BnaA03g39040D	30.4054	-3.51527	1.06081	-3.63955	0.000273111	0.00416847
BnaA03g39290D	103.98	-3.15703	0.568667	-5.51022	3.58379e-08	2.13657e-06
BnaA03g39520D	485.716	-2.04505	0.597075	-3.42428	0.000616424	0.0079494
BnaA03g39760D	388.58	2.59773	0.420284	6.17693	6.53619e-10	5.92954e-08
BnaA03g40240D	21.9078	4.95549	0.969341	4.65081	3.30637e-06	0.000110069
BnaA03g40260D	55.8819	2.51413	0.567013	4.41331	1.01801e-05	0.000284256
BnaA03g40370D	149.631	-2.0656	0.429351	-4.80434	1.5526e-06	5.78936e-05
BnaA03g40380D	23.6626	-2.70175	0.787707	-3.36023	0.000778768	0.00954853
BnaA03g40750D	64.0707	-3.61062	0.865365	-4.10317	4.07529e-05	0.000895666
BnaA03g40940D	51.2225	-2.96904	0.832971	-3.53164	0.000412996	0.00579107
BnaA03g41290D	32.6334	3.2059	0.835883	3.76757	0.000164844	0.00275257
BnaA03g41350D	16.8318	-2.71291	0.946519	-2.79125	0.00525049	0.0406017
BnaA03g41430D	41.0783	-2.21643	0.701904	-3.14074	0.0016852	0.0173113
BnaA03g41830D	29.9324	2.21712	0.730192	3.01983	0.00252919	0.0234833
BnaA03g41920D	144.43	-2.07032	0.531822	-3.88777	0.00010117	0.00187455
BnaA03g41970D	712.312	-3.60891	0.700317	-5.1519	2.57863e-07	1.21297e-05
BnaA03g41980D	972.354	3.08251	0.31008	9.93653	2.88716e-23	2.08632e-20
BnaA03g42010D	101.118	-6.08839	0.93993	-5.63458	1.75489e-08	1.1368e-06
BnaA03g42030D	50.0154	4.08968	0.741917	5.32295	1.02098e-07	5.33559e-06
BnaA03g42770D	35.8768	-3.603	0.798947	-4.32931	1.49574e-05	0.000386495
BnaA03g42850D	58.4822	-2.24994	0.625639	-3.57902	0.000344881	0.00502945
BnaA03g42870D	1344.02	2.80434	0.418597	6.69793	2.11396e-11	2.74458e-09
BnaA03g42940D	4181.69	2.26644	0.333411	6.79747	1.0647e-11	1.4776e-09
BnaA03g42990D	91.8277	-2.00795	0.649892	-3.08394	0.00204276	0.020016
BnaA03g43440D	161.27	-2.29479	0.560501	-4.08829	4.34574e-05	0.000945193
BnaA03g43530D	283.287	-2.44061	0.389999	-6.2511	4.07563e-10	3.89995e-08
BnaA03g43670D	150.44	-2.49505	0.528503	-4.71004	2.47671e-06	8.64311e-05
BnaA03g43840D	42.2955	5.98163	0.906248	5.58574	2.32707e-08	1.46445e-06
BnaA03g44070D	51.1423	-3.12447	0.707141	-4.34969	1.36329e-05	0.000360265
BnaA03g44190D	117.636	-2.37632	0.473561	-5.00449	5.60092e-07	2.38079e-05
BnaA03g44740D	114.399	-2.45652	0.517436	-4.7325	2.2177e-06	7.81735e-05
BnaA03g45080D	1233.15	-4.44933	0.460384	-9.64611	5.10551e-22	3.1468e-19
BnaA03g45260D	11.6788	2.87247	0.952056	2.8948	0.00379396	0.0318662
BnaA03g45370D	28.6655	-3.65951	0.940833	-3.65233	0.000259874	0.00400141
BnaA03g45390D	123.879	-6.11388	0.701313	-7.35207	1.95168e-13	4.04944e-11
BnaA03g45520D	16.3726	-3.47621	0.915298	-3.43929	0.000583252	0.00760824
BnaA03g45570D	254.174	-2.1436	0.554813	-3.86075	0.000113038	0.00204562
BnaA03g45630D	114.798	-2.25016	0.533707	-4.20654	2.59309e-05	0.00061576
BnaA03g45670D	151.441	5.23141	0.528509	9.56191	1.15603e-21	6.92165e-19
BnaA03g45680D	20.5088	-2.64402	0.822997	-3.14132	0.0016819	0.0172901
BnaA03g45820D	204.888	3.0606	0.439893	6.94194	3.86757e-12	5.95948e-10
BnaA03g45910D	16.6633	3.39191	0.915543	3.49486	0.000474306	0.00645007
BnaA03g46220D	77.5351	2.92265	0.6404	4.54102	5.59829e-06	0.000172526
BnaA03g46470D	166.766	3.87103	0.474057	8.10877	5.11335e-16	1.57103e-13
BnaA03g46580D	20.9982	-3.48461	1.05832	-3.48906	0.00048472	0.00655972
BnaA03g46680D	20.8623	4.01446	0.910648	3.94405	8.01169e-05	0.00155771
BnaA03g46690D	10.7875	3.74122	1.039	3.56461	0.000364398	0.00526281
BnaA03g46790D	14.5032	-3.00616	0.97394	-2.92788	0.0034128	0.0293711
BnaA03g46960D	20.8436	-3.27464	0.841456	-3.6938	0.000220926	0.00350736
BnaA03g47140D	44.3207	-2.89036	0.812057	-3.52361	0.000425714	0.00592775
BnaA03g48020D	28.403	-2.17623	0.73259	-2.94582	0.00322102	0.0281277
BnaA03g48210D	17.6498	2.60067	0.827192	3.08986	0.00200251	0.0197295
BnaA03g48430D	552.6	-2.10111	0.343783	-6.10938	1.00021e-09	8.75804e-08
BnaA03g48570D	59.787	-2.76782	0.594819	-4.61499	3.93105e-06	0.000127621
BnaA03g48780D	11.9499	-3.60937	1.04152	-3.44043	0.000580782	0.00758119
BnaA03g48890D	21.7975	-3.97774	0.975227	-3.50615	0.000454639	0.00623115
BnaA03g48900D	12.2482	-3.03524	0.951262	-2.95665	0.00310999	0.0274239
BnaA03g49470D	69.5264	3.33195	0.587667	5.61377	1.97965e-08	1.2648e-06
BnaA03g50000D	131.306	2.36399	0.819462	2.8856	0.00390672	0.0325589
BnaA03g50120D	21.4629	3.86163	0.860618	4.13982	3.47579e-05	0.000789579
BnaA03g50180D	67.7298	-4.45358	0.867744	-4.86263	1.15835e-06	4.49526e-05
BnaA03g50360D	52.5652	3.03391	0.655453	4.587	4.49667e-06	0.000143428
BnaA03g51190D	26.169	-2.37007	0.785556	-2.98574	0.00282897	0.0254929
BnaA03g51290D	73.5407	-2.00598	0.705713	-2.8358	0.00457112	0.0367443
BnaA03g51440D	35.8887	4.91811	0.830967	5.01564	5.28566e-07	2.27213e-05
BnaA03g52240D	14.1882	-2.93553	0.92445	-3.01072	0.00260631	0.0240078
BnaA03g52350D	335.587	8.41703	0.720008	7.0756	1.48801e-12	2.50463e-10
BnaA03g52650D	88.7129	-2.86021	0.765696	-3.7199	0.000199306	0.00323897
BnaA03g52940D	164.27	2.29524	0.405854	5.64892	1.61458e-08	1.05405e-06
BnaA03g52990D	59.4042	-2.19286	0.572387	-3.81432	0.00013656	0.00237588
BnaA03g53700D	395.682	-2.1335	0.365848	-5.82856	5.59081e-09	4.08939e-07
BnaA03g53710D	25.5477	-3.38123	0.820365	-3.9296	8.50865e-05	0.00163885
BnaA03g53940D	288.408	-2.04519	0.522807	-3.90954	9.24702e-05	0.00174664
BnaA03g54140D	37.5971	-5.51926	0.927576	-5.1719	2.31725e-07	1.10364e-05
BnaA03g54320D	202.432	4.45814	0.455098	9.69152	3.27627e-22	2.04948e-19
BnaA03g54590D	660.596	3.53839	0.80578	4.40191	1.07304e-05	0.000296461
BnaA03g54700D	20.006	4.80037	0.979237	4.5093	6.50416e-06	0.000195554
BnaA04g00240D	106.477	-2.45064	0.645526	-3.78659	0.000152729	0.00258922
BnaA04g00340D	45.9539	2.01944	0.701752	2.87029	0.00410093	0.0337877
BnaA04g00910D	77.9014	-3.56325	0.70875	-4.95062	7.39789e-07	3.03683e-05
BnaA04g00950D	131.681	-3.46248	0.528433	-6.50193	7.92941e-11	8.86233e-09
BnaA04g01640D	349.32	-7.29755	0.72229	-8.41306	3.99438e-17	1.48153e-14
BnaA04g01650D	32.4038	-3.12417	1.06288	-3.03302	0.00242116	0.0227677
BnaA04g01660D	195.968	-2.46916	0.533802	-4.61809	3.87285e-06	0.000126024
BnaA04g02460D	483.127	2.36985	0.378212	6.2635	3.76431e-10	3.61858e-08
BnaA04g02560D	314.621	-4.24224	0.574823	-7.33215	2.26489e-13	4.56376e-11
BnaA04g02630D	368.045	2.02418	0.412865	4.90119	9.52583e-07	3.76293e-05
BnaA04g02730D	218.275	-2.11626	0.617134	-3.42658	0.00061124	0.00789469
BnaA04g03380D	43.2461	-2.02468	0.627432	-3.21075	0.00132389	0.0143934
BnaA04g03700D	215.83	-2.19454	0.629408	-3.48319	0.000495472	0.00667592
BnaA04g03930D	74.3737	2.4271	0.519622	4.65641	3.21767e-06	0.000107801
BnaA04g03990D	15.5153	-2.5358	0.882939	-2.8021	0.00507717	0.0396431
BnaA04g04000D	39.3219	-2.4248	0.710787	-3.38662	0.00070759	0.00886226
BnaA04g04140D	60.9231	4.39317	0.645971	6.53326	6.43521e-11	7.32914e-09
BnaA04g04310D	90.2157	-2.50827	0.591308	-4.22514	2.38797e-05	0.00057421
BnaA04g04390D	61.5711	2.54486	0.551592	4.59347	4.3593e-06	0.000139364
BnaA04g04450D	143.715	2.56107	0.618333	4.13554	3.54116e-05	0.000800525
BnaA04g04820D	14.4628	2.61769	0.868146	2.94946	0.00318332	0.0278926
BnaA04g04830D	117.241	2.15163	0.475645	4.51765	6.25293e-06	0.000188618
BnaA04g04900D	89.9634	2.16721	0.50634	4.27255	1.9325e-05	0.000479261
BnaA04g05200D	16.3792	3.40481	0.907024	3.5321	0.000412281	0.00578491
BnaA04g05470D	107.024	-2.99472	0.604835	-4.92482	8.44391e-07	3.39311e-05
BnaA04g05820D	234.146	2.1125	0.648448	3.25667	0.00112726	0.0126657
BnaA04g05980D	84.659	-3.49607	0.726635	-4.75913	1.9443e-06	6.99598e-05
BnaA04g06110D	16.3021	4.42096	1.00306	4.16784	3.07495e-05	0.000712029
BnaA04g06300D	375.085	2.33216	0.59361	3.9275	8.58339e-05	0.00164644
BnaA04g06910D	67.3019	-2.5999	0.631538	-4.09121	4.29128e-05	0.000934804
BnaA04g06980D	370.779	-2.44209	0.476288	-5.12344	3.00012e-07	1.37723e-05
BnaA04g07040D	24.4197	-2.39643	0.84558	-2.80688	0.00500231	0.0392102
BnaA04g07720D	303.127	2.0741	0.353865	5.85869	4.66537e-09	3.51682e-07
BnaA04g07800D	696.394	-2.50157	0.388929	-6.42879	1.28626e-10	1.3823e-08
BnaA04g07870D	58.3141	-3.74745	1.04302	-3.60337	0.000314114	0.00467309
BnaA04g08490D	385.237	-3.14574	0.605773	-5.18456	2.16522e-07	1.0407e-05
BnaA04g09470D	22.0538	-3.1205	1.06886	-3.295	0.000984226	0.0114268
BnaA04g09660D	10.7501	-2.83873	0.967084	-2.74694	0.00601537	0.0448925
BnaA04g10810D	58.9579	2.44759	0.631905	3.85886	0.000113919	0.00205806
BnaA04g11790D	96.6572	-5.33787	0.66384	-7.32113	2.45897e-13	4.88437e-11
BnaA04g11900D	97.7212	-2.38793	0.612764	-3.88615	0.000101846	0.00188125
BnaA04g11970D	42.1767	5.53824	0.849162	4.73958	2.14158e-06	7.60018e-05
BnaA04g12110D	157.7	2.60203	0.471754	5.50618	3.66702e-08	2.16557e-06
BnaA04g12130D	19964.1	2.40262	0.613677	3.91588	9.00755e-05	0.00170954
BnaA04g12220D	50.2866	4.901	0.746408	5.96916	2.38482e-09	1.91848e-07
BnaA04g12270D	62.4521	2.23458	0.544262	4.09394	4.24108e-05	0.000926757
BnaA04g12350D	319.645	-2.01028	0.382681	-5.24984	1.5223e-07	7.58651e-06
BnaA04g12440D	10.1959	3.22731	1.01685	2.83142	0.00463423	0.0371141
BnaA04g12560D	25.6446	-3.37133	1.00695	-3.21099	0.0013228	0.0143882
BnaA04g12590D	430.298	2.72624	0.386532	7.04825	1.81181e-12	3.00144e-10
BnaA04g12640D	61.375	2.38249	0.5535	4.28906	1.79435e-05	0.000450843
BnaA04g12690D	382.164	2.31768	0.411474	5.63008	1.80128e-08	1.16146e-06
BnaA04g12710D	18.5274	2.49881	0.836895	2.94467	0.00323304	0.0281748
BnaA04g12790D	17.3826	-2.94829	0.973118	-2.91602	0.00354524	0.0302377
BnaA04g13100D	41.009	-2.14107	0.708347	-3.00436	0.00266139	0.0243387
BnaA04g13300D	11.5974	3.79986	1.0372	3.62159	0.0002928	0.00440325
BnaA04g13630D	81.6473	2.1616	0.603043	3.57822	0.000345945	0.00503796
BnaA04g13760D	241.104	-5.70362	0.946984	-5.53953	3.03291e-08	1.85299e-06
BnaA04g13790D	14.817	-2.89698	0.96555	-2.85749	0.00427006	0.0348523
BnaA04g13890D	225.285	-2.71767	0.58301	-4.65328	3.267e-06	0.000109018
BnaA04g13920D	17.8195	-3.91372	0.95926	-3.4556	0.000549072	0.00724605
BnaA04g13930D	210.685	2.32021	0.408309	5.67751	1.36671e-08	9.10678e-07
BnaA04g14120D	61.6524	-2.38135	0.604177	-3.92198	8.78234e-05	0.00167694
BnaA04g14140D	276.316	-3.53542	0.397302	-8.8638	7.73317e-19	3.6831e-16
BnaA04g15010D	97.4063	-3.12033	0.822019	-3.78367	0.000154534	0.00261373
BnaA04g16300D	9.54252	-3.31978	1.05289	-3.17778	0.00148409	0.0156738
BnaA04g16500D	29.5554	2.08443	0.706579	2.93608	0.00332394	0.0288074
BnaA04g17120D	13.9232	-2.81521	0.933622	-2.88993	0.00385329	0.0321894
BnaA04g17390D	24.7713	-3.21578	0.835284	-3.70807	0.000208844	0.0033614
BnaA04g17560D	175.874	-2.93707	0.763509	-3.84324	0.000121423	0.00216188
BnaA04g17870D	11.2646	3.76069	1.03889	3.58655	0.00033508	0.00490961
BnaA04g18550D	97.8997	-6.71135	0.87307	-6.21062	5.2777e-10	4.92648e-08
BnaA04g18780D	30.4267	-5.03429	0.964791	-4.7182	2.37943e-06	8.32443e-05
BnaA04g18970D	244.103	3.09443	0.770993	4.01318	5.99068e-05	0.00123139
BnaA04g18980D	1694.06	3.2856	0.328543	9.99739	1.56465e-23	1.17103e-20
BnaA04g19350D	38.8148	-3.66376	0.938336	-3.75786	0.000171372	0.00284711
BnaA04g19410D	704.015	-3.6613	0.375867	-9.72571	2.34255e-22	1.51048e-19
BnaA04g19530D	41.6417	2.81555	0.686646	4.06401	4.8236e-05	0.00103041
BnaA04g19580D	20.3286	-2.84283	1.03672	-2.73758	0.00618936	0.0458045
BnaA04g19840D	14.9283	3.01763	0.904944	3.20996	0.00132755	0.0144221
BnaA04g20300D	127.537	2.0951	0.492583	4.24867	2.15042e-05	0.000524307
BnaA04g20520D	22.2084	-2.92968	1.05999	-2.81414	0.00489081	0.0385598
BnaA04g20850D	17.2813	-2.83358	0.900883	-3.04624	0.00231726	0.0220079
BnaA04g20860D	439.008	8.43185	0.67649	9.0237	1.81839e-19	8.96616e-17
BnaA04g20880D	66.0901	2.55349	0.577067	4.40713	1.04751e-05	0.000291329
BnaA04g21150D	180.909	3.23104	0.496754	6.48453	8.90105e-11	9.81739e-09
BnaA04g21230D	403.318	3.09152	0.40961	7.53906	4.73384e-14	1.07246e-11
BnaA04g21240D	234.688	3.52504	0.417385	8.41757	3.84361e-17	1.43834e-14
BnaA04g21420D	69.6346	-3.14327	0.576817	-5.38945	7.06718e-08	3.89224e-06
BnaA04g21540D	174.191	-2.04965	0.6577	-3.11378	0.0018471	0.0185649
BnaA04g21600D	11.5716	-2.77033	1.07202	-2.85455	0.00430983	0.0351222
BnaA04g21850D	2131.47	-2.27817	0.503587	-4.52351	6.08224e-06	0.00018459
BnaA04g22070D	96.423	2.05132	0.635527	3.224	0.00126412	0.0139316
BnaA04g22080D	3218.21	3.51023	0.431246	8.13837	4.00637e-16	1.28179e-13
BnaA04g22400D	54.6762	-2.41575	0.591588	-4.05726	4.96515e-05	0.00105474
BnaA04g23050D	14.637	-3.55714	0.973497	-3.19806	0.00138356	0.0149184
BnaA04g23090D	229.087	-2.05986	0.47028	-4.37612	1.20812e-05	0.000327099
BnaA04g23320D	7.60512	3.04618	1.06596	2.97943	0.00288787	0.0258735
BnaA04g23480D	163.78	-3.20236	0.54244	-5.87581	4.2079e-09	3.21828e-07
BnaA04g23830D	46.3781	2.54242	0.662735	3.81517	0.000136089	0.00237162
BnaA04g23880D	42.8459	-3.59207	0.836096	-4.17509	2.97869e-05	0.000691649
BnaA04g23990D	49.7418	2.41191	0.645276	3.72166	0.000197914	0.00322135
BnaA04g24160D	14.7563	-4.01731	1.01938	-3.80027	0.000144541	0.00247873
BnaA04g24740D	171.762	-3.90431	0.632013	-6.12755	8.92427e-10	7.92445e-08
BnaA04g24840D	128.909	-2.80603	0.524422	-5.33138	9.74702e-08	5.13212e-06
BnaA04g24870D	1301.62	2.84212	0.536483	5.29693	1.17765e-07	6.04132e-06
BnaA04g24960D	27.5459	4.87364	0.894599	4.18754	2.81994e-05	0.000662705
BnaA04g25020D	73.5477	-2.14544	0.651645	-3.28248	0.001029	0.0117996
BnaA04g25220D	134.06	-2.56529	0.468895	-5.45493	4.89926e-08	2.77859e-06
BnaA04g25510D	71.7007	-2.42673	0.598562	-4.0354	5.451e-05	0.00113998
BnaA04g25870D	13.4039	-2.61331	0.918155	-2.7459	0.00603453	0.0449954
BnaA04g26080D	31.635	-4.95177	0.975359	-4.64119	3.46401e-06	0.000114589
BnaA04g26210D	42.1842	3.36468	0.741766	4.45837	8.25859e-06	0.000238713
BnaA04g26280D	14.08	-2.96267	0.976942	-2.88247	0.00394567	0.0327792
BnaA04g26320D	875.635	2.08861	0.309735	6.7422	1.56006e-11	2.08233e-09
BnaA04g26430D	67.5696	-2.09189	0.685428	-3.04514	0.00232568	0.0220767
BnaA04g26900D	57.192	-2.47822	0.628264	-3.92198	8.78242e-05	0.00167694
BnaA04g26960D	1336.75	5.75723	0.370902	15.4487	7.70388e-54	4.03606e-50
BnaA04g27120D	130.687	2.25108	0.430266	5.22472	1.74421e-07	8.52021e-06
BnaA05g00640D	151.345	4.53724	0.541176	8.25174	1.56101e-16	5.15157e-14
BnaA05g00710D	15.2245	-3.30855	1.06102	-3.27874	0.0010427	0.011911
BnaA05g00920D	290.385	2.22686	0.383036	5.81049	6.22901e-09	4.48574e-07
BnaA05g01050D	3252.63	2.04575	0.34166	5.98746	2.13143e-09	1.74137e-07
BnaA05g01150D	876.821	2.86937	0.474086	6.05033	1.44553e-09	1.21656e-07
BnaA05g01590D	450.919	2.10968	0.656122	3.21527	0.00130323	0.0142465
BnaA05g01790D	830.628	3.79389	0.492748	7.69162	1.45288e-14	3.58194e-12
BnaA05g02030D	59.6677	3.44194	0.587345	5.78094	7.42832e-09	5.24134e-07
BnaA05g02300D	98.9102	-2.13512	0.616809	-3.4541	0.000552127	0.00727467
BnaA05g02380D	21.2605	-4.08316	1.02792	-3.89582	9.78677e-05	0.00182872
BnaA05g02550D	128.672	5.75526	0.615132	8.68113	3.91865e-18	1.65898e-15
BnaA05g02780D	198.765	2.28444	0.68927	3.31287	0.000923445	0.0108687
BnaA05g03210D	76.6915	-2.41679	0.819942	-2.94268	0.00325385	0.0283172
BnaA05g03920D	33.1085	-3.86797	0.955894	-3.77552	0.000159675	0.00268487
BnaA05g04000D	34.7858	5.6868	0.92396	5.31786	1.04995e-07	5.45975e-06
BnaA05g04390D	12.3794	2.76469	0.992077	2.70917	0.00674527	0.0486337
BnaA05g04510D	118.824	-2.42682	0.48968	-4.94175	7.74253e-07	3.14443e-05
BnaA05g04590D	18.7874	-3.55007	1.05425	-3.49612	0.000472073	0.00643431
BnaA05g04610D	12.7958	-2.80239	0.99026	-2.7133	0.00666176	0.0481906
BnaA05g04780D	101.235	2.15644	0.692558	3.11047	0.00186787	0.0186862
BnaA05g04860D	76.4052	-3.5067	0.63102	-5.47177	4.45553e-08	2.56159e-06
BnaA05g04890D	931.306	6.73418	0.442896	14.9233	2.3244e-50	9.74204e-47
BnaA05g05180D	69.4401	4.94027	0.705796	6.55879	5.42463e-11	6.36854e-09
BnaA05g05240D	106.424	2.66395	0.611192	4.34745	1.37727e-05	0.000363044
BnaA05g05590D	142.667	-4.0032	0.708786	-5.58253	2.37046e-08	1.48729e-06
BnaA05g05760D	262.338	2.24033	0.375441	5.9634	2.4705e-09	1.97602e-07
BnaA05g05780D	201.238	-2.81492	0.50562	-5.55277	2.81177e-08	1.7356e-06
BnaA05g05860D	141.486	-3.39162	0.63239	-5.32975	9.83468e-08	5.1653e-06
BnaA05g06450D	67.1903	-2.77116	0.580963	-4.73341	2.20775e-06	7.78883e-05
BnaA05g06730D	40.4087	-2.32929	0.637273	-3.62695	0.000286783	0.00432829
BnaA05g06740D	30.0221	3.11727	0.759587	4.02718	5.64492e-05	0.0011724
BnaA05g06870D	44.3998	2.22252	0.657217	3.36947	0.000753117	0.00929739
BnaA05g07320D	16.2849	-3.17829	1.06579	-3.2182	0.00128997	0.0141681
BnaA05g07330D	56.8655	3.18291	0.67682	4.65691	3.20995e-06	0.000107652
BnaA05g07370D	257.667	2.02749	0.42296	4.79134	1.6567e-06	6.09617e-05
BnaA05g07460D	161.991	-2.11035	0.742901	-2.83895	0.00452616	0.0364903
BnaA05g07520D	67.9156	4.54748	0.638864	6.82476	8.80694e-12	1.24702e-09
BnaA05g07590D	234.856	-2.5314	0.43462	-5.81539	6.04929e-09	4.38647e-07
BnaA05g07600D	31.8983	-2.79126	0.909981	-3.03275	0.00242338	0.0227813
BnaA05g07970D	96.719	-2.18551	0.599229	-3.63818	0.000274571	0.00418618
BnaA05g08020D	21.9847	-4.56547	0.990937	-4.29591	1.73974e-05	0.000439254
BnaA05g08070D	23.643	-3.90807	0.992715	-3.45335	0.00055367	0.00729043
BnaA05g08110D	57.6366	-2.72728	0.868373	-3.12745	0.00176329	0.0179246
BnaA05g08580D	56.6396	2.03639	0.553178	3.67237	0.000240311	0.00375678
BnaA05g08690D	11.5218	-3.5145	1.04637	-3.36018	0.000778928	0.00954853
BnaA05g08810D	215.769	2.07542	0.504294	4.1132	3.90209e-05	0.000863032
BnaA05g09310D	9.55815	2.91371	0.981772	2.79221	0.00523488	0.0405384
BnaA05g09830D	561.858	-2.94502	0.401718	-7.32409	2.40532e-13	4.80055e-11
BnaA05g10050D	119.79	4.13921	0.503929	8.1013	5.43767e-16	1.65148e-13
BnaA05g10240D	18.4457	2.28941	0.795609	2.84725	0.00440988	0.0357775
BnaA05g10620D	22.535	-4.04714	1.03196	-3.88024	0.000104353	0.00192186
BnaA05g11170D	48.9285	-2.49929	0.84049	-2.95724	0.00310405	0.0274056
BnaA05g11250D	42	2.59083	0.794407	3.24411	0.00117817	0.0131468
BnaA05g11350D	74.3681	-3.34883	0.804364	-4.12509	3.70597e-05	0.000828398
BnaA05g11710D	34.9281	-3.78968	0.926542	-3.87682	0.000105829	0.00194293
BnaA05g12210D	203.548	3.09512	0.640022	4.82697	1.38626e-06	5.25801e-05
BnaA05g12360D	143.603	2.62193	0.498341	5.25144	1.50917e-07	7.53003e-06
BnaA05g12530D	76.7701	-2.1941	0.536112	-4.07948	4.5136e-05	0.000975304
BnaA05g12940D	19.2117	3.43337	0.859984	3.79468	0.000147833	0.00252278
BnaA05g12980D	917.025	6.84293	0.445353	15.0418	3.90596e-51	1.81896e-47
BnaA05g13330D	98.7329	-2.14561	0.501147	-4.27118	1.94441e-05	0.000481074
BnaA05g13560D	196.022	-3.29278	0.635807	-5.15946	2.47663e-07	1.17289e-05
BnaA05g13740D	1727.18	2.16792	0.568074	3.81632	0.000135458	0.00236338
BnaA05g13900D	221.666	2.79892	0.395741	7.06166	1.64521e-12	2.73626e-10
BnaA05g14120D	223.603	2.45249	0.439664	5.57271	2.50803e-08	1.56657e-06
BnaA05g14180D	9.69561	3.52672	1.04901	3.38133	0.000721358	0.00899272
BnaA05g14420D	49.1237	3.25728	0.832177	3.87377	0.000107164	0.00195962
BnaA05g14840D	24.832	4.67275	0.91341	4.01767	5.87771e-05	0.00121353
BnaA05g14880D	75.2245	-2.68131	0.802845	-3.32495	0.00088435	0.0105089
BnaA05g15300D	54.6659	-2.87757	0.726445	-3.92232	8.77006e-05	0.00167611
BnaA05g15470D	19.4939	3.88889	0.920966	3.80994	0.000138999	0.00240634
BnaA05g15530D	18.9435	-2.81551	0.904941	-3.01615	0.00256006	0.0237016
BnaA05g15840D	19.87	2.6161	0.890599	2.89858	0.00374853	0.0315693
BnaA05g15980D	34.1402	3.29894	0.813448	3.97777	6.95659e-05	0.00138973
BnaA05g16010D	323.686	2.01784	0.432308	4.66592	3.07241e-06	0.000103948
BnaA05g16460D	1392.08	2.72529	0.453778	6.00475	1.91624e-09	1.58409e-07
BnaA05g18870D	90.6375	-6.31976	0.793746	-5.59334	2.22741e-08	1.40384e-06
BnaA05g18980D	19.2908	-3.50611	1.05645	-3.47577	0.000509396	0.00682757
BnaA05g19050D	98.4102	7.14737	0.846363	6.61346	3.75449e-11	4.57437e-09
BnaA05g19380D	20.9243	-4.54713	0.989895	-4.27976	1.87099e-05	0.000466489
BnaA05g19630D	1066.65	2.35106	0.336259	6.99063	2.73654e-12	4.34446e-10
BnaA05g19640D	10.5266	3.36042	1.0036	2.93428	0.00334321	0.0289147
BnaA05g20090D	246.6	2.55098	0.589921	4.32076	1.55493e-05	0.000399573
BnaA05g20120D	31.1352	2.5885	0.727699	3.52519	0.000423186	0.00589646
BnaA05g20350D	19.0678	3.84018	0.92626	3.75369	0.000174251	0.00288449
BnaA05g20530D	56.377	2.43562	0.825347	2.94518	0.0032277	0.028148
BnaA05g20540D	44.726	-3.1	0.703978	-4.33432	1.46213e-05	0.000380777
BnaA05g20720D	17.9293	2.93624	0.845214	3.38029	0.000724089	0.00901331
BnaA05g20830D	49.915	2.47508	0.851242	2.90139	0.00371517	0.0313426
BnaA05g21010D	56.9817	2.49709	0.660004	3.76823	0.000164412	0.00274974
BnaA05g21210D	1429.04	2.27485	0.536589	4.23928	2.2424e-05	0.000542629
BnaA05g22160D	116.564	4.11508	0.621305	6.53762	6.25056e-11	7.19926e-09
BnaA05g23290D	551.225	-2.37669	0.536181	-4.43067	9.39408e-06	0.000265313
BnaA05g23690D	3442.42	2.0154	0.518748	3.88517	0.000102259	0.00188638
BnaA05g23930D	8.16177	-2.72008	1.07156	-2.71198	0.00668833	0.0483367
BnaA05g24000D	73.5419	3.2264	0.551886	5.79756	6.72878e-09	4.7962e-07
BnaA05g24040D	261.209	-2.04876	0.429985	-4.76108	1.92557e-06	6.94532e-05
BnaA05g24050D	39.627	-2.45618	0.862304	-2.83495	0.00458325	0.0367809
BnaA05g24540D	566.541	-3.22688	0.602049	-5.35486	8.56227e-08	4.56567e-06
BnaA05g24880D	11.6731	-3.68055	1.03603	-3.49563	0.000472942	0.00644108
BnaA05g24900D	248.021	-5.49646	0.780157	-6.80951	9.7931e-12	1.37734e-09
BnaA05g25190D	79.8263	3.51668	0.543474	6.40165	1.53706e-10	1.59458e-08
BnaA05g25230D	10.7121	-3.07273	1.00702	-2.78225	0.00539842	0.0413864
BnaA05g25270D	41.5971	-4.92314	0.916621	-4.31322	1.60897e-05	0.00041044
BnaA05g25600D	29.847	-3.7745	0.813377	-4.35196	1.34929e-05	0.000356791
BnaA05g26020D	25.3095	-4.08551	0.892757	-4.01805	5.86808e-05	0.00121214
BnaA05g26240D	25.9936	-3.49259	0.889871	-3.71395	0.000204046	0.00329925
BnaA05g26280D	275.544	-2.11928	0.699144	-3.03014	0.00244443	0.0229196
BnaA05g26660D	27.3787	-4.91292	0.970252	-4.61004	4.02594e-06	0.000130097
BnaA05g26770D	66.2492	-2.29908	0.543438	-4.21253	2.52521e-05	0.000602372
BnaA05g26900D	1488.28	2.00752	0.552635	3.6326	0.000280584	0.00426235
BnaA05g27150D	362.956	2.22111	0.636294	3.48999	0.000483033	0.00654539
BnaA05g27180D	31.2451	2.40167	0.846985	2.82134	0.00478239	0.0379549
BnaA05g27350D	85.4802	2.42373	0.528858	4.57126	4.8481e-06	0.000153122
BnaA05g27390D	32.2563	-3.50151	0.87641	-3.83491	0.000125609	0.00222508
BnaA05g27440D	1510.85	2.30379	0.776861	2.9685	0.00299254	0.0266348
BnaA05g27700D	12.3864	-2.6666	0.940461	-2.72696	0.00639201	0.0468442
BnaA05g28470D	1412.72	2.45267	0.596353	4.11288	3.90749e-05	0.000863313
BnaA05g28480D	34.7996	-3.4827	1.00034	-3.37704	0.000732707	0.00909318
BnaA05g29310D	237.508	-4.17285	0.711165	-5.8231	5.77665e-09	4.21796e-07
BnaA05g29430D	10.6361	-3.18141	1.0066	-2.82288	0.00475947	0.0378374
BnaA05g29820D	8.4386	-3.14353	1.05923	-3.02015	0.00252653	0.0234638
BnaA05g29830D	51.4918	-5.55803	0.839302	-4.90622	9.28473e-07	3.67461e-05
BnaA05g30010D	18.1036	-2.92365	0.888658	-3.17616	0.00149237	0.0157315
BnaA05g30530D	209.355	3.94498	0.528501	7.42264	1.14812e-13	2.44265e-11
BnaA05g30670D	76.2527	4.19868	0.751721	5.45786	4.81916e-08	2.7443e-06
BnaA05g30930D	107.487	2.22441	0.580571	3.82594	0.000130272	0.00229122
BnaA05g31210D	329.695	-2.60941	0.46573	-5.59707	2.18003e-08	1.37812e-06
BnaA05g31340D	375.013	-2.07849	0.391399	-5.30761	1.11073e-07	5.74726e-06
BnaA05g32420D	18.2092	-3.38206	0.94254	-3.33414	0.000855644	0.0102316
BnaA05g32730D	227.707	2.16108	0.443339	4.87147	1.10774e-06	4.31081e-05
BnaA05g33310D	602.952	2.23155	0.570225	3.91285	9.12128e-05	0.0017267
BnaA05g33390D	779.765	4.2029	0.393831	10.6525	1.69751e-26	1.77865e-23
BnaA05g33550D	19.6004	2.77715	0.80256	3.39206	0.000693703	0.00873221
BnaA05g33630D	269.495	2.40558	0.388914	6.18061	6.38541e-10	5.80533e-08
BnaA05g33710D	84.2221	3.29808	0.528192	6.19528	5.81802e-10	5.35922e-08
BnaA05g33720D	117.777	3.5068	0.509779	6.83241	8.34992e-12	1.19035e-09
BnaA05g33740D	43.5434	-2.44483	0.845987	-2.87115	0.00408981	0.0337227
BnaA05g33810D	57739.3	2.51513	0.791752	3.18166	0.00146432	0.0155505
BnaA05g33830D	1548.5	2.70075	0.337387	8.00351	1.20918e-15	3.4013e-13
BnaA05g34000D	700.811	-2.01849	0.532539	-3.78948	0.000150963	0.00256367
BnaA05g34180D	185.712	3.73488	0.513464	7.23641	4.60716e-13	8.69799e-11
BnaA06g00050D	69.7549	-2.56586	0.765188	-3.33944	0.000839477	0.0100814
BnaA06g00380D	50.7738	2.7657	0.63887	4.29938	1.71273e-05	0.000432954
BnaA06g00410D	135.633	-2.00143	0.455502	-4.38773	1.1454e-05	0.000312489
BnaA06g00750D	42.1065	2.35802	0.701488	3.34619	0.000819308	0.00992165
BnaA06g00880D	96.1789	4.30814	0.655502	6.43974	1.19681e-10	1.29614e-08
BnaA06g01000D	213.551	-2.32162	0.494817	-4.68645	2.77989e-06	9.54224e-05
BnaA06g01010D	331.164	-2.54033	0.457143	-5.5516	2.8306e-08	1.74209e-06
BnaA06g01440D	6.79517	2.91544	1.06871	2.85991	0.00423761	0.0346279
BnaA06g01450D	7.98462	3.1855	1.06166	3.08959	0.0020043	0.0197425
BnaA06g01730D	171.821	-2.57341	0.815683	-3.15485	0.00160582	0.0167005
BnaA06g01740D	36.3575	-2.01115	0.739521	-2.70541	0.00682203	0.0490185
BnaA06g01980D	867.8	-2.66428	0.722164	-3.69098	0.00022339	0.00353444
BnaA06g01990D	1505.9	-2.8123	0.680014	-4.13688	3.52059e-05	0.000797594
BnaA06g02990D	61.8409	-3.64237	0.618011	-5.75892	8.46545e-09	5.92327e-07
BnaA06g03010D	11.6552	-2.98298	1.0259	-2.71701	0.00658746	0.0478748
BnaA06g03240D	27.4662	-2.46427	0.795603	-3.05462	0.00225346	0.0215338
BnaA06g03920D	31.0149	-4.79777	0.891086	-4.23474	2.28814e-05	0.000552423
BnaA06g04040D	42.5959	2.59079	0.675989	3.80774	0.00014024	0.00242382
BnaA06g04330D	40.2118	-2.35146	0.840679	-2.78475	0.00535683	0.0411803
BnaA06g04650D	31.849	-3.51712	0.771524	-4.36738	1.25747e-05	0.00033784
BnaA06g05210D	21.0606	-2.14883	0.771537	-2.75387	0.00588954	0.0442132
BnaA06g05220D	48.2026	-2.35422	0.761876	-3.07594	0.00209841	0.0204086
BnaA06g05360D	1356.98	4.04586	0.695676	5.81861	5.93394e-09	4.32527e-07
BnaA06g05410D	38.494	5.83889	0.914813	5.45617	4.86521e-08	2.76302e-06
BnaA06g05920D	151.441	-2.62641	0.606512	-4.32045	1.55714e-05	0.000399895
BnaA06g06670D	40.6671	2.89821	0.655118	4.37737	1.20118e-05	0.00032564
BnaA06g06970D	49.6302	-2.70001	0.867437	-3.09545	0.00196515	0.0194575
BnaA06g07090D	59.5802	2.71389	0.690387	3.9115	9.17243e-05	0.00173482
BnaA06g07360D	147.041	2.44002	0.681996	3.57421	0.000351291	0.00509457
BnaA06g08030D	39.7401	-2.0939	0.766232	-2.72343	0.00646072	0.0471827
BnaA06g08120D	18.3991	2.57274	0.869701	2.91467	0.00356069	0.0303427
BnaA06g08450D	46.0116	3.15435	0.652355	4.7748	1.79887e-06	6.56745e-05
BnaA06g08550D	163.738	-4.7219	0.640768	-7.19458	6.26545e-13	1.16194e-10
BnaA06g08770D	27.9756	3.3146	0.836165	3.86281	0.00011209	0.00203285
BnaA06g08870D	8.59942	3.21886	1.06145	3.13046	0.0017453	0.0177892
BnaA06g08940D	95.0137	-2.51258	0.844806	-2.97291	0.00294992	0.0263114
BnaA06g09010D	106.321	-3.53105	0.550313	-6.34845	2.17501e-10	2.17563e-08
BnaA06g09020D	35.3427	-2.24541	0.656226	-3.39496	0.000686378	0.00865448
BnaA06g09160D	25.2597	2.34511	0.760406	3.05933	0.00221831	0.0212608
BnaA06g09210D	57.8174	-2.48163	0.681924	-3.61673	0.000298353	0.0044739
BnaA06g09340D	13.5302	-3.33234	1.05856	-3.26181	0.00110703	0.0124939
BnaA06g09380D	11.8368	2.92861	1.01195	2.77301	0.0055541	0.0423166
BnaA06g09730D	41.5733	-2.21309	0.664509	-3.31157	0.000927744	0.0109026
BnaA06g09930D	25.6955	2.98657	0.859503	3.41549	0.000636668	0.00815527
BnaA06g10010D	81.3233	-3.8641	0.994415	-3.90744	9.32791e-05	0.00175708
BnaA06g10250D	25.2764	2.64873	0.962171	2.74328	0.00608281	0.0452392
BnaA06g11010D	23.9722	-4.37155	1.01151	-4.13605	3.53328e-05	0.000800037
BnaA06g11310D	37.4615	-2.08592	0.709388	-2.92349	0.00346128	0.0296966
BnaA06g11500D	47.3161	-2.44933	0.663561	-3.66748	0.00024495	0.00381082
BnaA06g11690D	35.774	4.02624	0.821258	4.663	3.11637e-06	0.000105164
BnaA06g12250D	37.1661	3.70873	0.873871	4.11915	3.80275e-05	0.000845073
BnaA06g12480D	218.456	-2.02585	0.528194	-3.83241	0.000126895	0.00224217
BnaA06g12870D	66.5074	-3.38013	0.606539	-5.48671	4.09477e-08	2.38693e-06
BnaA06g12970D	33.5218	-4.53128	0.839381	-4.6291	3.67267e-06	0.000120209
BnaA06g12980D	29.934	-2.07232	0.696785	-2.9514	0.00316332	0.0277483
BnaA06g13360D	79.5964	2.01821	0.494127	4.07773	4.54768e-05	0.000981475
BnaA06g13700D	91.6023	2.06869	0.525053	3.93426	8.3454e-05	0.00161334
BnaA06g13740D	37.9769	-2.72586	0.747555	-3.59922	0.000319172	0.00472356
BnaA06g13810D	653.896	-2.2803	0.344093	-6.62434	3.48812e-11	4.28722e-09
BnaA06g14090D	21.4292	2.66236	0.950834	2.77685	0.00548883	0.0419184
BnaA06g14130D	15.4984	2.60841	0.908221	2.8196	0.00480837	0.0381033
BnaA06g14170D	617.201	-2.25879	0.330106	-6.83988	7.92596e-12	1.14946e-09
BnaA06g14220D	251.373	3.0742	0.534299	5.74407	9.24272e-09	6.4054e-07
BnaA06g14510D	1666.66	-2.64239	0.476834	-5.54056	3.01499e-08	1.84473e-06
BnaA06g14550D	69.7718	3.92143	0.776405	4.96158	6.99225e-07	2.89013e-05
BnaA06g15030D	12.6562	-3.14469	1.06459	-3.11835	0.00181864	0.0183493
BnaA06g15040D	28.3849	-2.22972	0.704935	-3.13262	0.00173256	0.0176996
BnaA06g15270D	105.842	2.20745	0.526955	4.18251	2.88305e-05	0.000673922
BnaA06g15780D	47.2626	-3.02916	0.827183	-3.62337	0.000290786	0.00438236
BnaA06g16410D	63.9954	2.30762	0.626943	3.67036	0.000242206	0.00377529
BnaA06g17530D	106.105	-2.61827	0.493462	-5.28567	1.25244e-07	6.37816e-06
BnaA06g17800D	70.4857	-2.43259	0.699108	-3.46352	0.000533157	0.00708936
BnaA06g17810D	31.2961	-2.7515	0.871783	-3.11479	0.00184073	0.0185187
BnaA06g18100D	148.831	-3.00391	0.543028	-5.50998	3.58882e-08	2.13657e-06
BnaA06g18180D	20.789	-2.82129	0.973149	-2.84251	0.00447602	0.0361811
BnaA06g18620D	528.892	-2.18864	0.534685	-4.09181	4.28018e-05	0.000933548
BnaA06g18640D	9.69857	-3.26357	1.05611	-3.13744	0.0017043	0.0174733
BnaA06g18750D	14.2205	-2.54104	1.07255	-2.79766	0.00514738	0.0400526
BnaA06g19130D	40.0709	2.48614	0.627015	3.93987	8.15256e-05	0.00158117
BnaA06g19680D	23.4115	4.61436	0.913578	3.97158	7.13975e-05	0.00141888
BnaA06g20450D	32.5524	-5.24387	0.947339	-4.9147	8.89204e-07	3.54262e-05
BnaA06g20530D	63.2833	2.37111	0.585637	4.03529	5.45347e-05	0.00113998
BnaA06g20630D	21.3	2.83353	0.890933	3.12826	0.00175846	0.0178798
BnaA06g20910D	10.7638	-3.3531	1.0537	-3.22472	0.00126095	0.0139039
BnaA06g20920D	11.2737	2.63262	0.92747	2.755	0.00586925	0.0441185
BnaA06g20930D	51.6478	2.95472	0.592969	4.939	7.85256e-07	3.18603e-05
BnaA06g20970D	110.498	2.32573	0.498304	4.65928	3.17323e-06	0.000106569
BnaA06g21920D	16.5523	-2.73442	0.917224	-2.89874	0.00374661	0.0315693
BnaA06g22160D	346.356	-2.03692	0.504302	-4.03709	5.41179e-05	0.00113353
BnaA06g22170D	70.2577	-5.59646	0.962118	-5.21568	1.83142e-07	8.92539e-06
BnaA06g22180D	39.6619	-5.08202	0.976162	-4.75859	1.94952e-06	7.00756e-05
BnaA06g22190D	39.0247	-4.98885	0.983435	-4.68024	2.86542e-06	9.76386e-05
BnaA06g22420D	6.0828	2.73443	1.07162	2.70652	0.00679915	0.048896
BnaA06g22590D	333.439	5.73308	0.576179	9.73089	2.22631e-22	1.45796e-19
BnaA06g23270D	81.9987	-3.64123	0.591516	-6.05769	1.38087e-09	1.16683e-07
BnaA06g23750D	103.57	-2.99661	0.68471	-4.35505	1.33039e-05	0.000353355
BnaA06g24550D	258.137	2.45934	0.567076	4.33382	1.46541e-05	0.000381244
BnaA06g24650D	1006.47	2.00662	0.344933	5.81674	6.00075e-09	4.35881e-07
BnaA06g24680D	1727.56	7.21191	0.381406	18.6327	1.74567e-77	2.43882e-73
BnaA06g24830D	665.328	2.43454	0.445401	5.46439	4.64496e-08	2.65956e-06
BnaA06g25060D	184.909	-2.57883	0.710929	-3.62319	0.000290994	0.00438236
BnaA06g25550D	327.041	-2.21938	0.398682	-5.56281	2.65459e-08	1.64585e-06
BnaA06g25770D	195.968	-2.662	0.707994	-3.75418	0.000173912	0.00288103
BnaA06g25780D	35.1854	-3.43737	0.803224	-4.13329	3.57603e-05	0.000806665
BnaA06g26040D	46.3044	-2.22431	0.76118	-2.90742	0.00364419	0.030868
BnaA06g26390D	416.141	-3.69927	0.538047	-6.85623	7.07013e-12	1.03249e-09
BnaA06g26650D	10.9247	-2.57149	1.07286	-2.7152	0.00662349	0.0480216
BnaA06g27710D	415.483	4.26293	0.661356	6.42686	1.30263e-10	1.39275e-08
BnaA06g27940D	129.358	2.28305	0.51773	4.40386	1.0634e-05	0.000294381
BnaA06g28960D	211.295	-2.56981	0.411428	-6.23443	4.53418e-10	4.28976e-08
BnaA06g28990D	23.6164	3.4723	0.84272	3.95684	7.5947e-05	0.00149231
BnaA06g29110D	58.6339	2.10218	0.62578	3.35155	0.000803616	0.00978534
BnaA06g29540D	16.7471	2.91006	0.964415	2.94891	0.00318901	0.0279326
BnaA06g29680D	27.6546	2.27877	0.71136	3.18107	0.00146732	0.0155549
BnaA06g29710D	138.944	2.35119	0.618839	3.79489	0.00014771	0.00252172
BnaA06g30190D	39.5935	2.18265	0.620704	3.50165	0.000462392	0.00631898
BnaA06g30230D	81.6284	-4.62562	0.686153	-6.41114	1.44435e-10	1.50962e-08
BnaA06g30270D	45.3988	3.05979	0.753332	4.0202	5.81497e-05	0.00120221
BnaA06g30390D	277.462	-2.62927	0.545159	-4.81654	1.46072e-06	5.4858e-05
BnaA06g30570D	1009.17	-2.00255	0.515257	-3.88593	0.000101937	0.00188211
BnaA06g30720D	474.093	2.86586	0.526089	5.44405	5.20839e-08	2.93406e-06
BnaA06g30770D	25.0261	2.26315	0.749386	2.99761	0.00272106	0.0247762
BnaA06g31000D	469.123	2.47333	0.42144	5.86608	4.46212e-09	3.39042e-07
BnaA06g31080D	310.51	-3.86199	0.604301	-6.36352	1.97185e-10	2.00107e-08
BnaA06g31110D	22.3016	-4.02003	0.957114	-3.59434	0.000325213	0.0048011
BnaA06g31160D	66.305	-2.47525	0.641693	-3.84059	0.000122741	0.00218072
BnaA06g31430D	28.2457	-3.02961	1.06418	-2.9322	0.00336567	0.029061
BnaA06g31650D	87.9417	3.14318	0.780926	4.0083	6.11562e-05	0.00125094
BnaA06g31690D	101.646	2.02187	0.478471	4.22039	2.43876e-05	0.000584077
BnaA06g31910D	9393.34	2.9378	0.579067	5.07416	3.89204e-07	1.73535e-05
BnaA06g32050D	33.3022	-2.84808	1.03399	-2.80004	0.00510958	0.0398127
BnaA06g32280D	1156.41	-5.05672	0.766385	-6.60393	4.00395e-11	4.85011e-09
BnaA06g32640D	296.754	-2.99926	0.711209	-4.21233	2.52748e-05	0.00060257
BnaA06g33050D	17.9314	-3.12006	1.06787	-3.21683	0.00129616	0.0141964
BnaA06g33460D	28.8262	4.3202	0.82327	4.75402	1.99409e-06	7.14327e-05
BnaA06g33850D	52.2931	-3.76027	0.684898	-5.32147	1.0293e-07	5.37235e-06
BnaA06g34160D	586.674	-2.33111	0.362769	-6.42295	1.33662e-10	1.42546e-08
BnaA06g34260D	20.3404	-3.04939	0.890599	-3.30249	0.000958317	0.0111788
BnaA06g34330D	161.318	-6.03823	0.674801	-8.03485	9.36942e-16	2.68966e-13
BnaA06g34380D	185.867	7.59397	0.752569	6.41434	1.41435e-10	1.48567e-08
BnaA06g34400D	46.3478	2.06228	0.698376	2.94533	0.00322609	0.0281457
BnaA06g34410D	8.6188	-3.05993	1.06306	-2.96193	0.00305719	0.0270969
BnaA06g34460D	10.5402	-3.25281	1.0581	-3.14632	0.00165342	0.0170769
BnaA06g34480D	72.81	-2.30773	0.568111	-4.04667	5.1952e-05	0.00109583
BnaA06g34540D	38.8331	3.26658	0.667793	4.80557	1.54314e-06	5.76242e-05
BnaA06g34600D	9.34782	-3.18043	1.05931	-3.06791	0.00215565	0.0208558
BnaA06g34860D	10.2225	-3.07794	1.01653	-2.73496	0.00623875	0.0460453
BnaA06g35280D	16.7429	-2.42087	0.868885	-2.73587	0.00622152	0.0459563
BnaA06g35330D	39.1131	5.85211	0.914602	5.46691	4.57945e-08	2.62564e-06
BnaA06g35390D	50.2187	2.90423	0.604234	4.76553	1.88362e-06	6.82267e-05
BnaA06g35450D	4468.77	2.25285	0.378509	5.95173	2.65325e-09	2.09817e-07
BnaA06g35500D	65.2551	-3.2865	0.782377	-4.15788	3.21216e-05	0.000738497
BnaA06g36220D	28.7189	4.41541	0.890771	4.37156	1.23363e-05	0.000333144
BnaA06g36380D	51.7043	4.41289	0.688515	6.09494	1.09477e-09	9.42071e-08
BnaA06g36560D	322.335	-5.81728	0.513236	-10.9406	7.37214e-28	9.36306e-25
BnaA06g36930D	20.622	2.45543	0.788674	3.07648	0.00209457	0.0203873
BnaA06g37060D	153.966	2.41418	0.468769	5.14303	2.70346e-07	1.25897e-05
BnaA06g37080D	37.7697	2.08231	0.755063	2.74939	0.00597058	0.0446612
BnaA07g01030D	30.4256	4.60839	0.862008	4.63074	3.64353e-06	0.000119396
BnaA07g01950D	384.2	2.4871	0.348205	7.1384	9.44222e-13	1.6353e-10
BnaA07g02200D	80.6285	-3.96244	1.02688	-3.89223	9.93264e-05	0.00184567
BnaA07g02870D	73.8132	-2.11108	0.5168	-4.0723	4.65519e-05	0.00099953
BnaA07g03570D	235.692	-3.14139	0.723779	-4.33264	1.47335e-05	0.000382421
BnaA07g03670D	48.2821	2.21662	0.786663	2.81032	0.00494919	0.0388948
BnaA07g03710D	19.202	-2.36588	0.822759	-2.83001	0.00465459	0.0372225
BnaA07g03760D	51.8512	3.54757	0.672517	5.18383	2.17374e-07	1.0436e-05
BnaA07g04280D	236.858	-2.73297	0.622059	-4.387	1.14925e-05	0.000313182
BnaA07g04390D	208.706	2.55979	0.399129	6.40555	1.49824e-10	1.56204e-08
BnaA07g04760D	19.7141	-3.43504	1.05941	-3.43818	0.000585634	0.00763218
BnaA07g05630D	620.59	2.92764	0.344242	8.4995	1.90412e-17	7.25505e-15
BnaA07g06190D	110.045	2.78881	0.68512	4.06032	4.9006e-05	0.00104314
BnaA07g06690D	27.1335	-3.47223	0.967449	-3.41114	0.000646914	0.00826126
BnaA07g06900D	233.711	-2.54369	1.07092	-4.1388	3.49126e-05	0.000792234
BnaA07g07500D	19.9571	-3.85282	1.04036	-3.716	0.000202401	0.00327588
BnaA07g07800D	67.3076	3.42676	0.567564	5.96763	2.40721e-09	1.93278e-07
BnaA07g07960D	21.3936	-3.78016	0.998878	-3.34537	0.000821721	0.00994031
BnaA07g07980D	932.682	2.14825	0.399372	5.37828	7.51991e-08	4.10741e-06
BnaA07g08270D	14.7723	-2.57701	1.07271	-2.83306	0.00461043	0.0369611
BnaA07g08290D	122.312	2.14833	0.448742	4.78142	1.74064e-06	6.38266e-05
BnaA07g08840D	168.521	3.05597	0.429277	7.09889	1.25758e-12	2.12532e-10
BnaA07g08930D	32.7061	-2.50022	0.897621	-2.76571	0.00567998	0.0430643
BnaA07g09040D	48.6234	2.01638	0.604698	3.32546	0.000882727	0.0104956
BnaA07g09250D	26.4238	5.24794	0.951451	4.91716	8.7809e-07	3.50834e-05
BnaA07g09270D	269.004	-7.50169	0.792772	-6.49418	8.3486e-11	9.25678e-09
BnaA07g09350D	98.2004	-3.1959	0.511662	-6.19324	5.89397e-10	5.40543e-08
BnaA07g09420D	887.049	-2.47302	0.335467	-7.36916	1.71709e-13	3.59833e-11
BnaA07g09650D	54.936	6.36599	0.884129	5.932	2.99271e-09	2.33576e-07
BnaA07g09660D	56.2209	6.39385	0.882905	5.95613	2.58282e-09	2.04634e-07
BnaA07g09960D	6.51109	2.84064	1.0701	2.79721	0.00515458	0.0400963
BnaA07g10170D	22.1486	2.14934	0.772901	2.76154	0.00575287	0.0435146
BnaA07g10530D	77.7663	3.03452	0.752438	4.0138	5.97485e-05	0.00123097
BnaA07g10570D	329.733	2.11639	0.36395	5.8126	6.15085e-09	4.4508e-07
BnaA07g11070D	162.796	-4.06556	0.793308	-5.07741	3.82621e-07	1.71146e-05
BnaA07g11130D	156.068	-2.57112	0.595827	-4.30616	1.66113e-05	0.000422204
BnaA07g11220D	26.4918	-2.6174	0.769377	-3.346	0.000819858	0.00992544
BnaA07g11240D	17.308	3.69262	0.937528	3.59324	0.000326591	0.00481975
BnaA07g11370D	21120.7	-2.60998	0.411589	-6.34123	2.27945e-10	2.26389e-08
BnaA07g11830D	15.5767	-2.73386	0.914454	-2.89237	0.00382342	0.0320367
BnaA07g12070D	34.0233	-2.34298	0.814544	-2.85462	0.00430878	0.0351205
BnaA07g12290D	136.365	-2.38281	0.635758	-3.74106	0.000183245	0.003013
BnaA07g12570D	35.2147	-2.44891	0.780439	-3.11351	0.00184877	0.0185671
BnaA07g12590D	155.269	2.87243	0.423538	6.76516	1.33165e-11	1.80039e-09
BnaA07g13020D	85.729	2.2333	0.504494	4.41784	9.96929e-06	0.0002793
BnaA07g13160D	113.815	2.76823	0.652187	4.23393	2.29642e-05	0.000554103
BnaA07g13420D	265.818	-2.49858	0.471076	-5.29801	1.17068e-07	6.01296e-06
BnaA07g13930D	473.475	3.07416	0.418489	7.33917	2.14929e-13	4.35174e-11
BnaA07g14170D	10.2875	-2.66743	1.07264	-2.75174	0.00592795	0.0444299
BnaA07g14280D	196.785	3.89043	0.57422	6.73782	1.60777e-11	2.1392e-09
BnaA07g14370D	147.502	-2.90499	0.43968	-6.58102	4.67235e-11	5.56328e-09
BnaA07g14440D	310.995	-2.12583	0.429539	-4.94565	7.58895e-07	3.09564e-05
BnaA07g14510D	243.105	2.16916	0.44827	4.83604	1.32451e-06	5.05583e-05
BnaA07g14550D	43.2786	-2.72484	0.643404	-4.1864	2.8341e-05	0.000665428
BnaA07g14730D	56.5807	-4.88773	0.894497	-4.74601	2.0747e-06	7.3941e-05
BnaA07g14800D	43.5595	3.33313	0.823018	3.99275	6.53102e-05	0.00132236
BnaA07g15140D	21.7881	-3.1197	0.909734	-3.30293	0.000956807	0.0111735
BnaA07g15340D	47.2571	-2.66094	0.64024	-4.11474	3.87612e-05	0.000858194
BnaA07g15430D	51.9232	5.8127	0.836245	4.96407	6.90315e-07	2.85894e-05
BnaA07g15460D	77.2235	3.69929	0.664705	5.49354	3.93964e-08	2.30935e-06
BnaA07g15560D	12.2101	3.79882	1.03895	3.62777	0.000285878	0.00431774
BnaA07g15580D	12.877	-2.90978	1.00297	-2.72998	0.00633373	0.0465353
BnaA07g15650D	16.1233	-2.80426	0.923294	-2.92718	0.00342053	0.0294078
BnaA07g15930D	589.749	2.16287	0.328086	6.59074	4.37631e-11	5.22564e-09
BnaA07g16410D	119.84	-2.46176	0.559884	-4.38466	1.16169e-05	0.000315956
BnaA07g16640D	585.946	4.09831	0.470643	8.68918	3.65065e-18	1.56128e-15
BnaA07g16680D	17.0603	-3.14415	1.03604	-2.89076	0.00384311	0.0321438
BnaA07g16850D	209.701	-2.04258	0.478357	-4.26596	1.99047e-05	0.000490352
BnaA07g17000D	11.5847	-2.76238	1.0721	-2.85005	0.00437123	0.0355259
BnaA07g17220D	13.8263	-3.04006	0.991315	-2.86323	0.00419342	0.0343808
BnaA07g17550D	15.1846	2.35262	0.854334	2.71578	0.00661191	0.0479526
BnaA07g17690D	19.0222	-4.48396	0.990491	-4.22372	2.40304e-05	0.000576511
BnaA07g18010D	27.5513	-2.11049	0.741973	-2.81916	0.00481497	0.0381337
BnaA07g18350D	946.027	2.08975	0.416975	5.01107	5.41285e-07	2.3177e-05
BnaA07g18900D	72.5844	-2.16733	0.537364	-4.02011	5.81716e-05	0.00120221
BnaA07g19080D	50.8862	2.77331	0.83089	3.32279	0.000891234	0.0105727
BnaA07g19760D	91.8717	2.76757	0.498036	5.53607	3.09339e-08	1.87899e-06
BnaA07g20080D	28.1645	3.76077	0.816556	4.38947	1.13625e-05	0.000310853
BnaA07g20330D	42.0665	-2.16954	0.642259	-3.3583	0.000784231	0.00958829
BnaA07g20680D	20.9157	3.55148	0.855041	3.93669	8.2614e-05	0.00160006
BnaA07g20780D	38.2916	-2.95344	0.746813	-3.88681	0.000101571	0.00187803
BnaA07g20870D	13.1313	2.46904	0.882955	2.74198	0.00610707	0.0453588
BnaA07g20920D	166.921	2.35772	0.438298	5.37295	7.74576e-08	4.18891e-06
BnaA07g21330D	37.4276	-3.71873	0.829955	-4.29009	1.78602e-05	0.000449583
BnaA07g21530D	303.122	2.35042	0.392164	5.98963	2.10322e-09	1.72505e-07
BnaA07g21960D	32.7387	-2.47669	0.79807	-3.0691	0.00214706	0.0208047
BnaA07g22580D	18.5493	-3.77809	1.04282	-3.64699	0.000265328	0.00407359
BnaA07g22620D	1315.7	-2.7125	0.841507	-3.2323	0.00122799	0.0135798
BnaA07g22640D	331.869	-2.70277	0.437272	-6.17363	6.67392e-10	6.04141e-08
BnaA07g22680D	17.643	3.68519	0.942165	3.57808	0.000346127	0.00503886
BnaA07g22930D	19.8078	-3.64175	0.93844	-3.50324	0.000459632	0.0062893
BnaA07g23000D	493.455	2.81305	1.06212	2.95479	0.00312883	0.0275437
BnaA07g23160D	376.048	-2.51074	0.542606	-4.62359	3.77159e-06	0.000123207
BnaA07g23310D	23.4	-3.68699	1.01602	-3.28698	0.00101269	0.0116523
BnaA07g23380D	27.1964	-2.23755	0.756529	-2.93236	0.00336394	0.029052
BnaA07g23580D	22.1797	-2.74414	0.802249	-3.34293	0.000828975	0.00999828
BnaA07g23670D	339.809	2.64484	0.432696	6.10773	1.01061e-09	8.8243e-08
BnaA07g23760D	21.9143	3.61997	0.849764	4.03012	5.57479e-05	0.00116121
BnaA07g23790D	160.235	-2.37007	0.442777	-5.34254	9.16552e-08	4.85032e-06
BnaA07g24270D	271.311	-3.05589	0.415046	-7.34486	2.05969e-13	4.21101e-11
BnaA07g24310D	29.4443	-2.802	0.847993	-3.24501	0.00117445	0.0131122
BnaA07g25210D	52.8247	3.45723	0.688203	4.94824	7.48894e-07	3.06368e-05
BnaA07g25310D	2965.25	2.84723	0.350002	8.13402	4.15274e-16	1.31267e-13
BnaA07g25350D	262.575	3.18924	0.380731	8.35958	6.2943e-17	2.19839e-14
BnaA07g25980D	15.5972	-3.7751	0.963285	-3.33784	0.000844321	0.0101193
BnaA07g26620D	23.4299	2.14701	0.762384	2.79762	0.00514801	0.0400526
BnaA07g26660D	67.4326	5.85628	0.772345	6.11584	9.60494e-10	8.45719e-08
BnaA07g26670D	489.309	3.80467	0.363241	10.453	1.41964e-25	1.35227e-22
BnaA07g26700D	86.831	-2.55088	0.574962	-4.41766	9.9777e-06	0.000279349
BnaA07g26750D	308.922	-7.29867	0.686551	-8.7053	3.16728e-18	1.38278e-15
BnaA07g27390D	244.495	2.3686	0.419403	5.64312	1.66994e-08	1.08344e-06
BnaA07g27410D	28.7963	5.37406	0.944266	5.03055	4.89075e-07	2.12857e-05
BnaA07g28000D	250.59	-4.00514	0.801847	-4.97453	6.54075e-07	2.72501e-05
BnaA07g28080D	378.217	4.09914	0.810006	5.06523	4.07916e-07	1.81492e-05
BnaA07g28360D	532.598	-2.60934	0.393978	-6.61849	3.62879e-11	4.43411e-09
BnaA07g28430D	206.858	-2.94739	0.552054	-5.32561	1.00614e-07	5.27117e-06
BnaA07g28450D	88.2193	-2.14983	0.48897	-4.38435	1.16335e-05	0.000316202
BnaA07g28550D	10.2031	2.70724	0.96053	2.71373	0.0066531	0.0481552
BnaA07g28730D	48.5811	2.45322	0.78274	3.12289	0.00179088	0.018139
BnaA07g29040D	33.2665	2.00058	0.649466	3.06841	0.00215199	0.0208301
BnaA07g29070D	43.9768	-2.24518	0.68104	-3.27997	0.00103819	0.0118709
BnaA07g29260D	30.1468	2.4542	0.798259	3.05285	0.00226679	0.0216414
BnaA07g29400D	15.3295	-2.86581	0.947049	-2.90976	0.00361704	0.0307002
BnaA07g29450D	7.37333	-2.89468	1.06693	-2.80673	0.00500476	0.039222
BnaA07g29460D	119.601	3.80372	0.525226	7.17512	7.22422e-13	1.30509e-10
BnaA07g29680D	27.3068	-2.14719	0.76027	-2.80294	0.0050639	0.0395671
BnaA07g30200D	251.729	-2.62829	0.500955	-5.23943	1.61073e-07	7.97979e-06
BnaA07g30590D	21.8764	2.78763	0.863979	3.17567	0.0014949	0.0157502
BnaA07g30610D	609.011	2.36018	0.548259	4.30395	1.67781e-05	0.000425154
BnaA07g30790D	885.772	-2.9053	0.826188	-3.52577	0.000422247	0.00589318
BnaA07g30830D	30.9	3.78549	0.766307	4.72658	2.28333e-06	8.03518e-05
BnaA07g30990D	354.092	2.81995	0.50927	5.5325	3.15705e-08	1.9066e-06
BnaA07g31260D	120.556	-3.04283	0.595405	-5.08562	3.66428e-07	1.64894e-05
BnaA07g31420D	120.742	-3.07388	0.541507	-5.64499	1.65188e-08	1.07505e-06
BnaA07g31880D	187.579	-2.14712	0.417413	-5.13746	2.78482e-07	1.29255e-05
BnaA07g32110D	14.6604	-3.29313	0.932541	-3.23234	0.00122779	0.0135798
BnaA07g32130D	6590.51	-6.15439	0.412367	-14.8996	3.31312e-50	1.26236e-46
BnaA07g32150D	7657.89	-2.25227	0.576194	-3.90921	9.25981e-05	0.00174819
BnaA07g32220D	742.983	7.87571	0.503143	14.4476	2.59539e-47	8.36755e-44
BnaA07g32310D	110.427	-2.05479	0.555311	-3.69412	0.000220647	0.00350724
BnaA07g32400D	176.143	2.89784	0.755763	3.83135	0.00012744	0.0022499
BnaA07g32570D	548.22	-8.13046	0.720727	-8.5452	1.28308e-17	5.12158e-15
BnaA07g32800D	132.906	-2.85313	0.792232	-3.59722	0.000321641	0.0047526
BnaA07g33410D	156.438	6.02705	0.607366	9.1675	4.84123e-20	2.47446e-17
BnaA07g33610D	81.5766	2.62727	0.745689	3.51462	0.000440389	0.0060896
BnaA07g33650D	27.5874	2.33528	0.729439	3.17774	0.00148429	0.0156738
BnaA07g34060D	11.6694	3.43489	1.0038	2.99992	0.00270048	0.0246263
BnaA07g34080D	309.768	2.38935	0.390117	6.12075	9.31352e-10	8.21785e-08
BnaA07g34120D	57.8472	2.05239	0.620053	3.30264	0.000957779	0.0111786
BnaA07g34190D	43.2723	-3.31593	0.740184	-4.37962	1.18887e-05	0.000322721
BnaA07g34250D	20.6117	-2.86196	0.886109	-3.14338	0.00167007	0.0172022
BnaA07g34370D	31.6497	-3.71817	0.838478	-4.20085	2.65917e-05	0.000628957
BnaA07g34990D	25.0784	-3.23073	0.852986	-3.64463	0.00026778	0.00410805
BnaA07g35090D	185.71	-2.30534	0.805815	-2.86129	0.00421924	0.0345318
BnaA07g35110D	122.239	-2.42193	0.692851	-3.48845	0.000485824	0.00657032
BnaA07g35120D	16.6113	2.24491	0.816688	2.71868	0.00655427	0.0477019
BnaA07g35150D	18.5208	2.48341	0.904226	2.71649	0.00659788	0.0479277
BnaA07g35600D	45.8396	-3.77641	0.704806	-5.1566	2.51475e-07	1.18558e-05
BnaA07g35640D	957.111	-9.41597	0.702183	-8.12359	4.52607e-16	1.40516e-13
BnaA07g35650D	42.5168	-2.43626	0.6359	-3.80095	0.000144145	0.00247395
BnaA07g35670D	177.636	-3.20945	0.434963	-7.34571	2.04667e-13	4.20491e-11
BnaA07g35730D	149.233	-3.2057	0.509527	-6.25913	3.87136e-10	3.71297e-08
BnaA07g35740D	248.712	-3.37298	0.529492	-6.34717	2.1931e-10	2.18851e-08
BnaA07g35780D	35.4361	-5.227	0.95527	-4.88984	1.00917e-06	3.96033e-05
BnaA07g35800D	26.7608	-4.95267	0.964628	-4.64969	3.3243e-06	0.000110578
BnaA07g35850D	208.365	-7.51332	0.852006	-6.86487	6.65541e-12	9.78742e-10
BnaA07g35900D	30.1561	-4.98174	0.969528	-4.66951	3.01912e-06	0.000102377
BnaA07g35920D	36.585	-5.50671	0.926729	-5.16402	2.417e-07	1.14786e-05
BnaA07g35930D	9.13863	-3.08514	1.06288	-2.99326	0.00276014	0.0250396
BnaA08g00110D	25.7885	3.08432	0.931664	3.25774	0.00112302	0.0126357
BnaA08g00130D	165.264	-3.56773	0.702951	-5.04474	4.54144e-07	1.99728e-05
BnaA08g00260D	14.6051	2.97481	0.908564	3.15716	0.00159313	0.016585
BnaA08g00830D	90.9134	7.06787	0.847801	6.55144	5.69838e-11	6.65266e-09
BnaA08g00970D	115.914	-2.1869	0.713312	-3.06323	0.00218963	0.0210728
BnaA08g01330D	6.17821	2.75722	1.07134	2.72621	0.00640664	0.0469104
BnaA08g01480D	16.7861	-3.50929	0.913442	-3.47423	0.000512327	0.00685589
BnaA08g02210D	63.5651	3.28227	0.62013	5.23959	1.60933e-07	7.97979e-06
BnaA08g02520D	166.625	2.01229	0.597428	3.36622	0.000762046	0.00937999
BnaA08g02610D	11.8349	3.84802	1.03464	3.66248	0.000249782	0.00387162
BnaA08g02770D	15.49	4.31733	1.00972	4.07476	4.60625e-05	0.000991562
BnaA08g03160D	149.927	-7.40683	0.831404	-6.83608	8.13891e-12	1.17223e-09
BnaA08g03220D	185.673	3.23516	0.644049	5.01067	5.42412e-07	2.3177e-05
BnaA08g03900D	38.647	-3.16408	0.708154	-4.3745	1.21714e-05	0.000329326
BnaA08g04230D	133.618	4.21849	0.633926	6.57292	4.93366e-11	5.85777e-09
BnaA08g04360D	70.9332	3.55547	0.717212	4.90084	9.54273e-07	3.76605e-05
BnaA08g04730D	27.1451	3.08893	0.777233	3.8939	9.86438e-05	0.00183505
BnaA08g04960D	30.2383	-5.17868	0.948993	-4.8591	1.17918e-06	4.55922e-05
BnaA08g05330D	11.2368	3.38344	1.00762	2.9564	0.00311258	0.027441
BnaA08g05660D	22.6536	-4.09494	0.962856	-3.60637	0.000310513	0.0046281
BnaA08g05700D	164.726	2.39336	0.41618	5.74344	9.27724e-09	6.4163e-07
BnaA08g05710D	72.2251	-2.80305	0.552322	-5.03883	4.68375e-07	2.04698e-05
BnaA08g06170D	128.193	-2.95284	0.516516	-5.6904	1.26743e-08	8.54025e-07
BnaA08g06370D	20.1042	-2.47706	0.815515	-2.98113	0.00287186	0.0257696
BnaA08g06420D	15.5595	-2.65058	0.921807	-2.80046	0.00510303	0.0397839
BnaA08g06660D	70.9491	2.78438	0.611769	4.52956	5.91054e-06	0.000180688
BnaA08g06720D	12.5043	-3.24709	1.01451	-2.88339	0.00393416	0.0327126
BnaA08g06730D	60.3827	4.94319	0.79733	5.70846	1.14001e-08	7.75649e-07
BnaA08g06750D	12.4031	3.98663	1.02658	3.77984	0.000156928	0.00264569
BnaA08g06820D	10.6056	2.96773	0.988924	2.83408	0.00459578	0.0368577
BnaA08g06940D	105.89	3.65287	0.54644	6.62557	3.45902e-11	4.26396e-09
BnaA08g07000D	12250.7	2.02041	0.452013	4.46985	7.82737e-06	0.000228924
BnaA08g07020D	57.1875	2.59723	0.562168	4.59672	4.29197e-06	0.000137422
BnaA08g07410D	24.6336	-4.36331	1.01321	-4.13278	3.58401e-05	0.000808031
BnaA08g07440D	59.206	-4.62162	0.826367	-5.15667	2.51379e-07	1.18558e-05
BnaA08g07670D	127.203	-2.14007	0.605821	-3.52649	0.000421104	0.00587919
BnaA08g07820D	25.3786	5.17879	0.955954	4.85385	1.21089e-06	4.66459e-05
BnaA08g07850D	15.2172	3.10321	0.883234	3.36637	0.000761651	0.00937999
BnaA08g08140D	44.5092	2.89238	0.790494	3.63097	0.000282353	0.00427683
BnaA08g08170D	318.319	3.63857	0.379677	9.55737	1.20785e-21	7.13004e-19
BnaA08g08320D	38.0709	-2.33184	0.71966	-3.21444	0.00130698	0.0142688
BnaA08g08410D	60.906	-4.89335	0.719267	-6.1459	7.95115e-10	7.13594e-08
BnaA08g08620D	784.092	-2.11514	0.464057	-4.55685	5.19277e-06	0.000162175
BnaA08g08630D	262.073	-2.59703	0.483797	-5.36072	8.2891e-08	4.44262e-06
BnaA08g08670D	25.332	5.15617	0.958176	4.83221	1.35029e-06	5.13084e-05
BnaA08g08690D	51.0707	-5.76898	0.924328	-5.37514	7.65213e-08	4.15401e-06
BnaA08g08750D	40.6355	5.88741	0.913737	5.49614	3.88185e-08	2.27866e-06
BnaA08g08910D	14.6307	-3.00024	0.91492	-3.09903	0.00194156	0.0192831
BnaA08g08920D	53.0575	2.61065	0.58469	4.44038	8.98001e-06	0.000256034
BnaA08g09060D	96.8674	3.20334	0.528671	6.0234	1.70787e-09	1.4259e-07
BnaA08g09190D	53.9382	-2.13926	0.586787	-3.62887	0.000284666	0.00430408
BnaA08g09980D	89.6107	2.68311	0.58776	4.55031	5.35668e-06	0.00016618
BnaA08g10180D	39.2838	-2.18744	0.756509	-2.87632	0.00402338	0.0332796
BnaA08g10940D	24.3851	2.79424	0.856765	3.21591	0.0013003	0.0142256
BnaA08g10990D	2227.22	2.50377	0.409024	6.12083	9.30908e-10	8.21785e-08
BnaA08g11370D	280.184	-3.01321	0.421469	-7.13431	9.72726e-13	1.67773e-10
BnaA08g11390D	64.6776	-2.9081	0.794622	-3.63978	0.000272867	0.00416778
BnaA08g11440D	56.4861	5.34233	0.748946	6.19827	5.70885e-10	5.27025e-08
BnaA08g11650D	172.017	-3.57848	0.526075	-6.7558	1.42046e-11	1.90205e-09
BnaA08g11780D	88.5923	-5.13093	0.738213	-6.38944	1.66499e-10	1.7077e-08
BnaA08g11820D	93.7039	-4.96278	0.701817	-6.63797	3.18031e-11	3.96706e-09
BnaA08g12520D	16.6693	2.60899	0.867772	2.95353	0.00314162	0.0276157
BnaA08g12690D	35.4618	-3.23186	0.816318	-3.85834	0.000114159	0.00206057
BnaA08g12920D	19.6435	-3.82672	1.04144	-3.69411	0.000220654	0.00350724
BnaA08g13480D	26.1142	4.80629	0.898771	4.12919	3.64046e-05	0.000817679
BnaA08g13760D	90.3722	-2.67189	0.746505	-3.56666	0.000361557	0.00522577
BnaA08g13840D	77.2341	-2.3145	0.717066	-3.21883	0.00128714	0.0141407
BnaA08g13940D	40.1449	-2.11062	0.763963	-2.75118	0.00593816	0.0444826
BnaA08g13960D	428.907	3.19225	0.394712	8.07798	6.58458e-16	1.97123e-13
BnaA08g13970D	92.4013	5.97943	0.733321	6.96629	3.25417e-12	5.07766e-10
BnaA08g14000D	47.3672	-3.98972	0.810364	-4.69026	2.72853e-06	9.40444e-05
BnaA08g14050D	12.8963	2.71851	0.943756	2.80396	0.00504785	0.0394564
BnaA08g14100D	455.897	-2.12605	0.354398	-5.99623	2.01951e-09	1.6629e-07
BnaA08g14200D	9.21422	2.6839	1.07281	2.80993	0.00495526	0.0389142
BnaA08g14480D	7.34434	-2.89349	1.06693	-2.80497	0.00503211	0.0393701
BnaA08g14520D	53.1984	-3.29382	0.78798	-4.11795	3.82255e-05	0.000848125
BnaA08g14630D	540.994	2.40296	0.86012	2.8011	0.00509289	0.0397249
BnaA08g14970D	59.3447	-3.14809	0.835689	-3.73679	0.000186385	0.00305863
BnaA08g15190D	9.02986	3.41593	1.05338	3.28448	0.00102169	0.0117351
BnaA08g15200D	338.384	2.73058	0.480807	5.67437	1.39202e-08	9.246e-07
BnaA08g15470D	14.6795	2.45185	0.868585	2.77588	0.00550526	0.0420208
BnaA08g16230D	56.4682	2.70025	0.593262	4.52521	6.03364e-06	0.000183781
BnaA08g16700D	139.42	-2.08411	0.458336	-4.54066	5.60777e-06	0.000172691
BnaA08g16820D	29290.2	2.04309	0.519565	3.93248	8.40756e-05	0.00162311
BnaA08g16880D	111.967	7.35013	0.834514	6.79596	1.07592e-11	1.48825e-09
BnaA08g17040D	46.9984	3.11439	0.704978	4.36832	1.25205e-05	0.000336815
BnaA08g17050D	300.377	-2.2051	0.398551	-5.52857	3.2285e-08	1.93858e-06
BnaA08g17490D	73.4629	-2.23022	0.663762	-3.34914	0.000810631	0.00985113
BnaA08g17770D	37.8333	2.58752	0.882546	2.91996	0.00350074	0.0299435
BnaA08g17780D	47.1432	3.33178	0.900549	3.66482	0.000247508	0.00384349
BnaA08g17830D	36.3173	4.44685	0.768077	5.32661	1.00063e-07	5.24885e-06
BnaA08g17880D	19.8726	2.40186	0.786707	3.01835	0.00254152	0.0235674
BnaA08g17900D	20.2852	2.43633	0.853368	2.82563	0.00471871	0.0375847
BnaA08g18220D	168.777	4.12448	0.612638	6.67562	2.46196e-11	3.15553e-09
BnaA08g18380D	64.4254	-3.1402	0.781461	-3.97777	6.95659e-05	0.00138973
BnaA08g18650D	75.866	-3.54675	0.783495	-4.46776	7.90411e-06	0.000230373
BnaA08g18660D	131.359	-2.30632	0.555911	-4.14059	3.46419e-05	0.00078737
BnaA08g18690D	37.962	2.204	0.655598	3.34654	0.000818261	0.00991183
BnaA08g19000D	40.0608	-3.47535	0.72342	-4.6626	3.12244e-06	0.000105199
BnaA08g19020D	24.6049	-3.59919	0.885943	-3.80442	0.000142136	0.00244547
BnaA08g19490D	71.4747	-4.26173	0.637225	-6.43061	1.27092e-10	1.36933e-08
BnaA08g19510D	156.207	2.54463	0.52257	4.86199	1.16211e-06	4.50566e-05
BnaA08g19550D	97.3933	2.14425	0.494364	4.33072	1.48623e-05	0.000384513
BnaA08g19680D	10.5208	-3.04118	1.066	-2.99776	0.00271969	0.0247691
BnaA08g20360D	9.7662	-3.33492	1.05258	-3.19342	0.00140598	0.0150864
BnaA08g20470D	18.7463	3.43487	0.935894	3.48051	0.000500462	0.00672718
BnaA08g20550D	8.85215	-3.18978	1.05794	-3.06431	0.00218172	0.0210229
BnaA08g20650D	477.882	2.58332	0.542255	4.76202	1.91665e-06	6.91908e-05
BnaA08g20780D	11.274	-3.60667	1.03997	-3.4308	0.000601806	0.00779688
BnaA08g20790D	224.376	-2.34061	0.393795	-5.93584	2.92341e-09	2.29021e-07
BnaA08g21280D	44.7476	-2.29348	0.635622	-3.58641	0.000335258	0.00490961
BnaA08g21370D	44.663	2.68257	0.788053	3.38487	0.000712117	0.0088987
BnaA08g21390D	128.808	3.5806	0.601101	5.91904	3.23831e-09	2.51807e-07
BnaA08g21410D	14.7756	-3.94468	1.02512	-3.73861	0.000185042	0.00303779
BnaA08g21530D	48.4344	-2.91211	0.850448	-3.39165	0.000694744	0.00873368
BnaA08g21600D	26.6678	2.87814	0.735913	3.84774	0.000119212	0.00213522
BnaA08g21740D	18.6228	3.15853	0.855916	3.5616	0.000368602	0.00531619
BnaA08g21760D	442.033	-3.42499	0.54471	-6.27744	3.44191e-10	3.33158e-08
BnaA08g21770D	23.048	-3.34343	1.03561	-3.0876	0.00201779	0.019838
BnaA08g21880D	221.139	-3.8296	0.931505	-4.149	3.33925e-05	0.000763297
BnaA08g21940D	84.5276	-4.4485	0.817086	-5.22643	1.72814e-07	8.46144e-06
BnaA08g21960D	12.0769	3.27339	0.95327	3.17221	0.00151282	0.0158951
BnaA08g22050D	11.3624	3.19188	0.958969	3.08562	0.00203131	0.0199289
BnaA08g22330D	38.9241	-2.32175	0.684645	-3.36724	0.000759251	0.00935383
BnaA08g22390D	91.7571	-6.31647	0.805894	-5.55169	2.82921e-08	1.74209e-06
BnaA08g22500D	43.6808	2.73156	0.782398	3.46892	0.000522564	0.00697728
BnaA08g22530D	49.1667	2.98828	0.620329	4.77095	1.8336e-06	6.67099e-05
BnaA08g22890D	25.2366	-2.57603	0.752626	-3.36514	0.000765061	0.00940882
BnaA08g23400D	18.55	-3.89306	0.968092	-3.43478	0.000593034	0.00770705
BnaA08g23520D	116.691	-2.84277	0.505616	-5.59782	2.17068e-08	1.37428e-06
BnaA08g23630D	15.9673	-2.89356	0.888484	-3.11701	0.00182694	0.0183976
BnaA08g23730D	199.717	-2.42832	0.439997	-5.51065	3.57508e-08	2.13445e-06
BnaA08g23740D	240.637	-3.97608	0.422759	-9.3366	9.94737e-21	5.48571e-18
BnaA08g23820D	26.491	-2.74526	0.857358	-3.14537	0.00165874	0.017115
BnaA08g23840D	27.7539	-2.69657	0.738132	-3.59024	0.000330371	0.00486184
BnaA08g24700D	388.577	-2.62039	0.492382	-5.31675	1.05639e-07	5.48642e-06
BnaA08g24820D	48.2987	-2.34781	0.597158	-3.90638	9.369e-05	0.00176245
BnaA08g24920D	1268.54	3.25328	0.773702	4.21214	2.52959e-05	0.000602729
BnaA08g25100D	3969.64	2.23115	0.516743	4.31779	1.57603e-05	0.000403661
BnaA08g26000D	17.17	-3.6726	1.04682	-3.55521	0.000377684	0.00541364
BnaA08g26050D	104.835	-2.87529	0.624799	-4.58249	4.59476e-06	0.000146223
BnaA08g26270D	216.077	-4.09086	0.544422	-7.44666	9.57338e-14	2.06824e-11
BnaA08g26300D	102.01	-2.70455	0.583208	-4.61974	3.84216e-06	0.000125271
BnaA08g26490D	3517.13	4.45977	0.318842	13.9806	2.04615e-44	5.71722e-41
BnaA08g26900D	15.5528	3.04548	0.909579	3.22591	0.00125573	0.0138573
BnaA08g27180D	33.7015	-3.19612	0.901769	-3.46804	0.000524278	0.00699794
BnaA09g00610D	496.208	-2.84708	0.427211	-6.65794	2.77697e-11	3.50568e-09
BnaA09g00670D	44.6045	-2.96396	0.668348	-4.36747	1.25692e-05	0.00033784
BnaA09g00710D	35.4138	-2.36706	0.796013	-2.94596	0.00321952	0.0281277
BnaA09g00730D	9.09032	-3.26861	1.05455	-3.1298	0.00174927	0.0178169
BnaA09g01390D	35.3165	3.67958	0.798635	4.46317	8.07556e-06	0.000234068
BnaA09g02000D	39.446	5.86251	0.914113	5.47605	4.34926e-08	2.51083e-06
BnaA09g02230D	14.8286	4.26684	1.01174	4.03002	5.57722e-05	0.00116121
BnaA09g02330D	170.988	2.06554	0.465696	4.43203	9.33496e-06	0.000263999
BnaA09g02410D	68.8598	-5.08153	0.718011	-6.35259	2.11714e-10	2.12791e-08
BnaA09g02500D	40.1977	-4.76766	0.843817	-4.79258	1.64653e-06	6.06407e-05
BnaA09g03190D	347.42	3.70365	0.38966	9.47991	2.54505e-21	1.46121e-18
BnaA09g03280D	54.2789	2.50839	0.625144	3.99425	6.48999e-05	0.00131469
BnaA09g03400D	45.7604	-2.52982	0.640787	-3.91364	9.09168e-05	0.00172187
BnaA09g03720D	51.8092	-3.53693	0.834915	-4.14911	3.33765e-05	0.000763297
BnaA09g03890D	763.131	-2.03629	0.3826	-5.32096	1.03221e-07	5.38086e-06
BnaA09g03960D	696.149	-3.12004	0.333753	-9.33966	9.66445e-21	5.40075e-18
BnaA09g04340D	161.395	-2.0494	0.587846	-3.48244	0.000496875	0.00668755
BnaA09g04540D	12.4144	2.78045	0.914015	2.94131	0.00326823	0.0284245
BnaA09g04550D	47.7129	-3.34546	0.647242	-5.05675	4.26464e-07	1.88942e-05
BnaA09g04570D	11.6151	-3.39789	1.05296	-3.27301	0.00106408	0.0121124
BnaA09g04600D	263.351	-3.65846	0.45253	-8.04721	8.47008e-16	2.44826e-13
BnaA09g04610D	1292.8	-2.84511	0.613141	-4.63995	3.4849e-06	0.000114996
BnaA09g05010D	41.0173	3.25459	0.77607	4.13199	3.59637e-05	0.000809946
BnaA09g05050D	16.1095	-3.71521	1.04304	-3.5719	0.000354402	0.00513436
BnaA09g05080D	1401.89	-2.70145	0.5066	-5.33151	9.74007e-08	5.13212e-06
BnaA09g05160D	28.2232	4.06533	0.882982	4.26896	1.96383e-05	0.00048502
BnaA09g05280D	89.0541	-2.15514	0.612645	-3.50969	0.000448635	0.00616692
BnaA09g05420D	59.114	2.57886	0.634108	4.04883	5.14736e-05	0.00108683
BnaA09g05710D	381.835	-4.89122	0.455217	-10.6284	2.19931e-26	2.24823e-23
BnaA09g06020D	96.6368	-2.64343	0.503073	-5.23153	1.68111e-07	8.26012e-06
BnaA09g06090D	96.6292	-2.18011	0.475556	-4.57238	4.82207e-06	0.00015253
BnaA09g06280D	24.5686	3.21785	0.807483	3.87749	0.000105541	0.00194095
BnaA09g06500D	67.8187	2.66706	0.531998	4.99008	6.03546e-07	2.5372e-05
BnaA09g06630D	712.464	2.03333	0.38542	5.27476	1.32932e-07	6.71258e-06
BnaA09g06650D	12.6985	2.82186	0.909524	2.99568	0.00273833	0.0249011
BnaA09g06810D	97.3142	-6.87678	0.852024	-6.3893	1.66647e-10	1.7077e-08
BnaA09g06870D	98.409	-3.46744	0.854157	-4.03953	5.35589e-05	0.00112519
BnaA09g06900D	42.879	2.19368	0.681602	3.20697	0.00134142	0.0145313
BnaA09g07010D	24.508	-3.49722	0.996925	-3.28694	0.00101282	0.0116523
BnaA09g07040D	138.841	-2.01123	0.427641	-4.69648	2.64685e-06	9.15305e-05
BnaA09g07140D	116.869	-3.07416	0.776481	-3.9448	7.98664e-05	0.00155474
BnaA09g07440D	1517.12	2.51654	0.629405	3.99872	6.36866e-05	0.00129574
BnaA09g07540D	125.957	-3.59812	0.710663	-5.02146	5.12792e-07	2.21113e-05
BnaA09g07560D	63.487	-2.33892	0.681726	-3.41697	0.000633215	0.00812096
BnaA09g07610D	25.5741	-2.61085	0.762761	-3.36227	0.000773053	0.00949595
BnaA09g07800D	163.396	-3.54524	0.657544	-5.36195	8.23275e-08	4.41807e-06
BnaA09g07830D	9.76543	3.23632	1.01241	2.83316	0.00460907	0.0369572
BnaA09g07860D	88.4262	-3.13194	0.647076	-4.80169	1.57333e-06	5.85625e-05
BnaA09g07910D	34.2246	-2.06893	0.676851	-3.03848	0.00237773	0.0224406
BnaA09g08040D	53.8036	-3.04393	0.69503	-4.32505	1.52495e-05	0.00039259
BnaA09g08120D	69.0247	-2.58571	0.684216	-3.76059	0.000169512	0.00281817
BnaA09g08190D	628.448	6.99293	0.479161	14.0318	9.96092e-45	2.98202e-41
BnaA09g08470D	11.4112	3.19533	0.95848	3.09037	0.00199909	0.0197004
BnaA09g08610D	26.5709	2.45296	0.896491	2.7211	0.00650644	0.047467
BnaA09g08790D	46.1933	2.79864	0.708636	3.91924	8.8829e-05	0.0016915
BnaA09g09070D	15.997	-4.20409	1.00723	-3.96811	7.24447e-05	0.00143577
BnaA09g09160D	58.8961	-3.66315	0.80488	-4.44092	8.95771e-06	0.000255746
BnaA09g09460D	619.009	-3.77045	0.704478	-5.34815	8.88591e-08	4.71425e-06
BnaA09g09590D	153.686	7.78026	0.81506	7.16544	7.75375e-13	1.38287e-10
BnaA09g09720D	729.063	-3.64746	0.740108	-4.93057	8.19886e-07	3.3201e-05
BnaA09g09990D	188.008	-4.99601	0.625635	-7.77016	7.83843e-15	1.97906e-12
BnaA09g10050D	60.6954	-3.50566	1.02423	-3.46698	0.000526336	0.00701647
BnaA09g10240D	134.707	-3.09506	0.562164	-5.47977	4.25886e-08	2.47226e-06
BnaA09g10320D	36.6481	-3.2633	0.715921	-4.43979	9.00482e-06	0.000256487
BnaA09g10380D	183.324	-2.9291	0.738656	-3.95673	7.59829e-05	0.00149231
BnaA09g10410D	9.35265	-3.14837	1.06069	-3.04435	0.0023318	0.022121
BnaA09g11000D	10.4566	-3.18942	1.06066	-3.09891	0.00194234	0.0192862
BnaA09g11150D	20.3547	-4.60144	0.982934	-4.33177	1.47914e-05	0.000383359
BnaA09g11160D	22.3388	-4.7044	0.978354	-4.4245	9.66642e-06	0.000272064
BnaA09g11210D	899.116	-2.14809	0.484191	-4.43551	9.18544e-06	0.000260474
BnaA09g11500D	32.8008	-2.27248	0.737346	-3.05813	0.0022272	0.0213217
BnaA09g12200D	695.676	2.51595	0.35833	7.01907	2.2335e-12	3.6143e-10
BnaA09g12280D	140.666	3.5972	0.769572	4.65571	3.22859e-06	0.000107994
BnaA09g12330D	368.717	-2.82122	0.486327	-5.79431	6.86017e-09	4.88155e-07
BnaA09g12530D	16.3345	2.99342	0.862563	3.35672	0.00078872	0.00963194
BnaA09g12610D	47.6884	-5.85935	0.907976	-5.47985	4.25688e-08	2.47226e-06
BnaA09g12630D	15.6409	-3.0807	0.973096	-2.99996	0.00270011	0.0246263
BnaA09g13070D	58.2287	-2.51617	0.603426	-4.14145	3.45114e-05	0.000785759
BnaA09g13160D	64.4503	2.57995	0.542178	4.73782	2.16026e-06	7.64704e-05
BnaA09g13280D	101.553	-2.44008	0.680351	-3.5786	0.000345443	0.0050359
BnaA09g13910D	17.9294	-2.74924	0.954423	-2.81003	0.00495367	0.0389089
BnaA09g14490D	82.6354	-2.25491	0.739899	-3.04198	0.00235026	0.0222796
BnaA09g14510D	432.216	-2.83569	0.44893	-6.30967	2.79639e-10	2.73199e-08
BnaA09g15080D	633.727	6.70786	0.449989	14.4787	1.65096e-47	5.76627e-44
BnaA09g15090D	1182.25	6.50407	0.382752	16.8002	2.43408e-63	1.45739e-59
BnaA09g15300D	31.019	-4.42512	0.860723	-4.42302	9.73306e-06	0.000273047
BnaA09g18190D	641.745	2.18627	0.374509	5.83636	5.3355e-09	3.93008e-07
BnaA09g18410D	518.924	2.3007	0.362607	6.34275	2.25699e-10	2.24692e-08
BnaA09g18890D	31.3802	-2.63884	0.778766	-3.33978	0.000838433	0.0100749
BnaA09g19060D	80.0894	-2.19569	0.558403	-3.91994	8.85728e-05	0.00168816
BnaA09g19380D	11.4542	-3.64475	1.0379	-3.46392	0.00053237	0.00708154
BnaA09g19620D	47.7557	2.09552	0.620213	3.36855	0.000755646	0.00932037
BnaA09g19930D	43.6656	-2.53614	0.702067	-3.5839	0.0003385	0.00494846
BnaA09g19970D	139.91	-2.94111	0.527949	-5.54827	2.88513e-08	1.77045e-06
BnaA09g20010D	50.7186	-5.03943	0.838171	-5.06107	4.16907e-07	1.85296e-05
BnaA09g20120D	215.339	-2.42267	0.72453	-3.34103	0.000834683	0.0100498
BnaA09g20370D	64.3052	-2.4534	0.564946	-4.3202	1.55886e-05	0.000400092
BnaA09g20420D	34.3356	-3.82784	1.051	-3.8612	0.000112832	0.00204365
BnaA09g20430D	46.7356	-2.09329	0.655712	-3.17753	0.00148536	0.0156812
BnaA09g20840D	137.307	-2.53737	0.91365	-2.78611	0.00533456	0.0410845
BnaA09g20900D	106.844	-3.98819	0.963614	-4.15225	3.29219e-05	0.000754827
BnaA09g21050D	59.441	-3.18647	1.03759	-3.19435	0.00140148	0.0150613
BnaA09g21710D	11.3578	3.83251	1.03451	3.64438	0.000268039	0.00411052
BnaA09g21800D	349.304	-2.55513	0.372242	-6.85719	7.02261e-12	1.02913e-09
BnaA09g22190D	30.4695	2.02921	0.735608	2.74734	0.00600802	0.0448552
BnaA09g22280D	15.8643	-3.74316	0.970895	-3.30773	0.000940551	0.0110176
BnaA09g23090D	2098.69	2.58392	0.514114	5.02574	5.01487e-07	2.17139e-05
BnaA09g23550D	77.6588	-2.4022	0.52365	-4.5675	4.93577e-06	0.000155657
BnaA09g23600D	113.841	3.21238	0.869079	3.69765	0.000217602	0.00347791
BnaA09g23800D	13.3273	-2.84706	0.93083	-2.90791	0.00363853	0.0308326
BnaA09g23990D	13.6858	4.15396	1.0176	3.9281	8.56208e-05	0.00164536
BnaA09g24000D	13.9254	4.16584	1.01724	3.93992	8.15084e-05	0.00158117
BnaA09g24110D	181.073	-2.26685	0.483279	-4.68446	2.80699e-06	9.60972e-05
BnaA09g24860D	104.844	-4.20242	0.812558	-5.05768	4.24386e-07	1.88221e-05
BnaA09g25050D	42.2855	2.5847	0.715461	3.59079	0.00032968	0.00485508
BnaA09g25890D	121.384	-2.43786	0.484429	-5.01954	5.17945e-07	2.23105e-05
BnaA09g25950D	7.53903	-2.83066	1.06893	-2.76606	0.00567388	0.0430414
BnaA09g26320D	325.661	4.84729	0.42254	11.3642	6.30628e-30	1.05723e-26
BnaA09g27350D	948.211	-3.86866	0.634332	-6.09389	1.10199e-09	9.44511e-08
BnaA09g27480D	36.4215	-2.24126	0.783429	-2.84504	0.00444061	0.0359616
BnaA09g27580D	76.115	4.38125	0.605749	7.01706	2.26589e-12	3.65262e-10
BnaA09g27660D	257.781	4.974	0.584072	8.40337	4.33853e-17	1.59506e-14
BnaA09g27680D	53.2743	3.49629	0.724962	4.74948	2.03941e-06	7.29316e-05
BnaA09g28340D	118.598	2.43097	0.564237	4.301	1.70031e-05	0.000430335
BnaA09g28510D	2254.12	2.78886	0.727652	3.83587	0.000125119	0.00221734
BnaA09g28590D	26.1298	-3.5425	1.0586	-3.59836	0.000320228	0.00473418
BnaA09g28670D	86.834	-4.45868	0.639142	-6.70781	1.97566e-11	2.58567e-09
BnaA09g28980D	216.905	-3.41049	0.781562	-4.35419	1.33559e-05	0.00035451
BnaA09g29230D	138.054	2.00974	0.664417	3.02292	0.00250347	0.023296
BnaA09g29240D	44.9005	3.67971	0.738005	4.86841	1.12497e-06	4.37382e-05
BnaA09g29330D	8.65036	3.30463	1.05786	3.19358	0.00140519	0.0150864
BnaA09g29340D	22.9531	5.0314	0.964618	4.71992	2.35932e-06	8.26954e-05
BnaA09g29380D	405.213	2.21716	0.601251	3.68673	0.000227157	0.00358053
BnaA09g29410D	7.22562	2.86283	1.0702	2.84097	0.0044976	0.0363345
BnaA09g29540D	316.414	-4.32166	0.803979	-5.35869	8.38267e-08	4.48131e-06
BnaA09g29560D	1594.28	-3.65973	0.531498	-6.88223	5.89248e-12	8.85182e-10
BnaA09g29710D	31.463	2.49415	0.682782	3.623	0.0002912	0.0043839
BnaA09g29740D	13.3258	-3.0974	1.06644	-3.10334	0.00191347	0.0190402
BnaA09g30170D	30.7722	2.10824	0.737882	2.84414	0.00445311	0.0360481
BnaA09g30190D	25.4883	-3.30339	0.936786	-3.3778	0.000730684	0.00907337
BnaA09g30420D	18.006	-3.30874	0.97038	-3.18118	0.00146677	0.0155549
BnaA09g30680D	213.239	-5.30951	0.511864	-10.0231	1.20634e-23	9.36302e-21
BnaA09g30690D	46.8082	-5.84379	0.908162	-5.46751	4.56412e-08	2.62043e-06
BnaA09g30920D	214.581	-2.24472	0.565615	-3.96501	7.33925e-05	0.00145027
BnaA09g31730D	199.821	2.75822	0.511055	5.38888	7.08998e-08	3.89968e-06
BnaA09g32000D	97.1146	2.55015	0.48168	5.27987	1.29272e-07	6.54354e-06
BnaA09g32060D	12.8577	-2.98608	0.989136	-2.81615	0.00486022	0.0383908
BnaA09g32110D	337.419	6.64445	0.579381	10.8127	2.99601e-27	3.48802e-24
BnaA09g32650D	47.7605	2.41346	0.624487	3.84675	0.000119695	0.00213748
BnaA09g33130D	1204.6	2.05295	0.409459	5.01334	5.34942e-07	2.29483e-05
BnaA09g33170D	131.211	2.22013	0.495739	4.47288	7.71736e-06	0.000226189
BnaA09g33460D	330.81	-2.31963	0.374366	-6.19113	5.97357e-10	5.45456e-08
BnaA09g33560D	511.721	3.16138	0.362587	8.71057	3.02348e-18	1.33389e-15
BnaA09g33770D	96.431	2.85832	0.514637	5.53222	3.16205e-08	1.90688e-06
BnaA09g34830D	245.605	3.97169	0.648879	6.09463	1.0969e-09	9.42071e-08
BnaA09g34930D	538.612	2.5517	0.355606	7.17241	7.36898e-13	1.31987e-10
BnaA09g35210D	119.58	2.12045	0.572944	3.69685	0.000218291	0.00348534
BnaA09g35370D	37.2819	-3.99894	0.809583	-4.63403	3.58617e-06	0.000117885
BnaA09g35590D	83.9091	2.49686	0.510328	4.87819	1.07062e-06	4.18189e-05
BnaA09g35820D	60.6454	2.11213	0.556954	3.78286	0.000155034	0.00261901
BnaA09g35850D	44.3405	-3.52911	0.691843	-4.95606	7.19381e-07	2.96176e-05
BnaA09g37020D	22.7007	-3.31021	1.0646	-3.41314	0.000642195	0.00821101
BnaA09g37080D	42.2022	4.07183	0.726297	5.37212	7.78174e-08	4.19753e-06
BnaA09g37250D	494.694	6.99914	0.494668	13.4148	4.9503e-41	1.29673e-37
BnaA09g37270D	23.8118	5.0348	0.966535	4.72107	2.34602e-06	8.23505e-05
BnaA09g37360D	10.5266	3.36042	1.0036	2.93428	0.00334321	0.0289147
BnaA09g37630D	33.3235	-2.31772	0.792487	-2.89923	0.00374082	0.0315463
BnaA09g37670D	352.233	2.45788	0.356989	6.88074	5.95439e-12	8.91287e-10
BnaA09g37710D	1314.15	3.17304	0.531128	5.97276	2.33275e-09	1.8802e-07
BnaA09g38100D	69.7652	-3.64305	1.01594	-3.63114	0.000282168	0.00427557
BnaA09g38260D	41.193	-2.62813	0.666703	-3.90021	9.6109e-05	0.00180148
BnaA09g38310D	13.7321	2.60078	0.928687	2.74397	0.00607002	0.0452245
BnaA09g38400D	12.6949	-2.79739	0.930083	-2.86075	0.00422645	0.0345772
BnaA09g39130D	19.589	2.3489	0.810925	2.86617	0.00415467	0.0341299
BnaA09g39550D	45.4812	-2.27301	0.659438	-3.42628	0.000611906	0.00789844
BnaA09g39610D	1843.12	2.50376	0.342352	7.31258	2.62058e-13	5.15651e-11
BnaA09g39670D	38.5375	-2.91389	0.90243	-3.19441	0.00140116	0.0150613
BnaA09g40000D	20.1545	4.6284	0.995305	4.35583	1.32561e-05	0.000352531
BnaA09g40320D	270.969	-3.07029	0.492915	-6.21474	5.14085e-10	4.80945e-08
BnaA09g40530D	299.734	2.71049	0.59332	4.56483	4.99892e-06	0.000157411
BnaA09g40640D	76.0062	2.23175	0.594122	3.74805	0.000178213	0.00293834
BnaA09g41150D	69.2015	-3.65389	0.625594	-5.72504	1.03406e-08	7.09324e-07
BnaA09g41160D	20.4105	-3.44339	0.908598	-3.52981	0.000415856	0.00582143
BnaA09g41200D	26.563	-2.01167	0.714296	-2.79525	0.00518593	0.0402903
BnaA09g41240D	34.9583	3.58736	0.884564	3.94981	7.82139e-05	0.00152981
BnaA09g41470D	83.843	-2.11722	0.623448	-3.38662	0.000707601	0.00886226
BnaA09g41920D	51.7404	-2.88381	0.970959	-2.97666	0.0029141	0.0260806
BnaA09g42030D	20.5445	-4.61501	0.982148	-4.34417	1.39804e-05	0.000366975
BnaA09g43800D	20.6863	3.86094	1.00466	3.37688	0.000733141	0.00909318
BnaA09g43840D	99.2161	5.67137	0.678959	7.58577	3.30514e-14	7.7823e-12
BnaA09g43940D	132.58	2.82909	0.462549	6.09961	1.06329e-09	9.20758e-08
BnaA09g44100D	19.2348	-2.95157	0.858593	-3.30874	0.000937182	0.0109872
BnaA09g44200D	58.7947	-2.89792	0.590309	-4.85987	1.17462e-06	4.54576e-05
BnaA09g44470D	64.2527	-2.67873	0.713355	-3.73088	0.00019081	0.0031227
BnaA09g44500D	17.2695	-2.78208	0.934669	-2.8899	0.00385369	0.0321894
BnaA09g45360D	4055.82	-2.81003	0.497875	-5.64379	1.66351e-08	1.08095e-06
BnaA09g45710D	121.309	-3.43315	0.487661	-6.97845	2.98444e-12	4.7024e-10
BnaA09g45840D	452.541	-2.16512	0.53038	-4.08035	4.49671e-05	0.00097298
BnaA09g45890D	73.337	-2.51813	0.621348	-4.03275	5.51269e-05	0.00115121
BnaA09g46020D	18.4971	-2.73174	0.887831	-2.99847	0.00271343	0.0247229
BnaA09g46240D	93.695	-4.08516	0.677855	-5.89282	3.79658e-09	2.92504e-07
BnaA09g46300D	22.292	-3.69881	1.05036	-3.64149	0.000271068	0.00414812
BnaA09g46440D	440.134	-2.12962	0.454701	-4.6814	2.8492e-06	9.71649e-05
BnaA09g46530D	10.5223	-3.03006	1.01085	-2.74628	0.00602754	0.0449593
BnaA09g46540D	10.9317	3.71883	1.0407	3.54926	0.000386314	0.00549786
BnaA09g46780D	12107.1	2.26426	0.52673	4.29893	1.71628e-05	0.000433592
BnaA09g47050D	16.2528	2.89024	0.965587	2.92258	0.00347148	0.0297539
BnaA09g47080D	35.5094	2.88676	0.766174	3.72685	0.000193884	0.00317053
BnaA09g47330D	26.8033	5.27805	0.949267	4.94504	7.61276e-07	3.10074e-05
BnaA09g47460D	37.0678	2.4754	0.652399	3.76882	0.000164022	0.00274541
BnaA09g47530D	40.6814	-3.49845	0.73815	-4.5975	4.2759e-06	0.000137117
BnaA09g47630D	17.0655	3.23201	0.884781	3.49454	0.000474878	0.00645366
BnaA09g47700D	23.1667	-3.46978	1.03457	-3.13603	0.00171252	0.0175446
BnaA09g47890D	61.1833	3.3275	0.597451	5.50611	3.66853e-08	2.16557e-06
BnaA09g47910D	52.146	-2.47587	0.712003	-3.45795	0.000544296	0.00719719
BnaA09g48650D	39.0123	-2.16316	0.73297	-2.9346	0.00333976	0.0289027
BnaA09g48810D	39.6645	-2.11815	0.726501	-2.90251	0.0037018	0.031255
BnaA09g49180D	69.0677	-3.20588	0.633868	-4.99981	5.73856e-07	2.4319e-05
BnaA09g49490D	15.7172	-3.14579	0.992608	-2.96	0.00307636	0.0272247
BnaA09g49620D	11.4044	3.8254	1.03517	3.63897	0.000273736	0.00417632
BnaA09g50010D	43.2619	-3.38181	0.872874	-3.79569	0.000147234	0.00251462
BnaA09g50590D	521.359	3.15978	0.641833	4.92082	8.61844e-07	3.45661e-05
BnaA09g51230D	42.0535	-2.11803	0.61528	-3.42343	0.000618371	0.00796226
BnaA09g51440D	320.015	2.00919	0.494912	4.05835	4.94214e-05	0.00105145
BnaA09g51530D	299.052	3.19399	0.51286	6.21768	5.04543e-10	4.74135e-08
BnaA10g00170D	77.0338	2.15206	0.578643	3.71167	0.000205895	0.00331903
BnaA10g00380D	186.273	3.50737	0.534003	6.54232	6.05702e-11	7.01276e-09
BnaA10g00430D	33.9555	2.55063	0.732714	3.45411	0.000552122	0.00727467
BnaA10g00520D	30.966	4.36738	0.832495	4.76401	1.8978e-06	6.85696e-05
BnaA10g00700D	409.597	3.29969	0.56418	5.84157	5.17123e-09	3.82251e-07
BnaA10g00770D	34.8178	-2.44271	0.785911	-3.07915	0.00207595	0.0202611
BnaA10g00780D	3522.19	3.00594	0.410029	7.33038	2.29496e-13	4.60222e-11
BnaA10g00990D	20.6802	3.04061	0.871682	3.40054	0.000672524	0.00851309
BnaA10g01170D	85.0045	-2.89214	0.972442	-2.99475	0.00274666	0.0249641
BnaA10g01190D	67.5595	-4.17387	0.953323	-4.21523	2.4952e-05	0.000596571
BnaA10g01230D	68.2689	-2.61933	0.589428	-4.41652	1.00303e-05	0.000280446
BnaA10g01500D	20.3292	2.502	0.819414	3.01634	0.00255844	0.0236978
BnaA10g01550D	18.0193	2.8091	0.897522	3.0656	0.0021723	0.020956
BnaA10g02210D	77.0953	-4.74904	0.882954	-5.00831	5.49095e-07	2.34117e-05
BnaA10g02270D	77.6629	-2.39635	0.760421	-3.14182	0.00167903	0.0172734
BnaA10g02480D	204.729	4.80572	0.566181	8.36364	6.08127e-17	2.14183e-14
BnaA10g02710D	143.371	3.03644	0.660627	4.58426	4.55592e-06	0.000145097
BnaA10g02900D	106.8	-3.26697	0.498492	-6.49941	8.0637e-11	8.98846e-09
BnaA10g02940D	21.8378	4.51995	0.919976	3.89051	0.000100034	0.00185597
BnaA10g03200D	140.722	2.20095	0.496144	4.43106	9.37721e-06	0.000265015
BnaA10g03280D	49.4626	2.88292	0.748661	3.8234	0.000131623	0.00230791
BnaA10g03700D	20.031	-4.0713	0.934309	-3.64343	0.000269032	0.00412123
BnaA10g04000D	19.9868	-3.71338	0.907121	-3.67877	0.000234358	0.00367881
BnaA10g04110D	13.0569	3.05265	0.935405	3.11013	0.00187004	0.0186968
BnaA10g04340D	25.7245	-4.96088	0.960982	-4.66173	3.13564e-06	0.000105559
BnaA10g04390D	131.936	-2.3864	0.618638	-3.8503	0.000117975	0.00211668
BnaA10g04810D	22.4915	-3.43148	1.06088	-3.48033	0.000500802	0.00672959
BnaA10g04950D	844.469	-2.49601	0.388626	-6.42026	1.36038e-10	1.4398e-08
BnaA10g05150D	24.1906	3.01818	0.935929	3.17285	0.00150949	0.0158719
BnaA10g05360D	17.0309	2.81428	0.869401	3.16094	0.0015726	0.0164039
BnaA10g05680D	16108.3	-13.0173	0.638799	-10.9964	3.97652e-28	5.20825e-25
BnaA10g06300D	23.6997	2.76915	0.781719	3.48781	0.000486992	0.00657636
BnaA10g06340D	59.3189	3.59531	0.642566	5.5069	3.65212e-08	2.16197e-06
BnaA10g06460D	20.5373	-2.3025	0.810218	-2.80466	0.00503704	0.0393938
BnaA10g06680D	50.2931	-2.09391	0.62052	-3.35912	0.000781913	0.00956767
BnaA10g06850D	152.485	-2.84275	0.448381	-6.31732	2.66145e-10	2.60758e-08
BnaA10g07070D	42.4312	-5.7243	0.913727	-5.36253	8.20658e-08	4.40967e-06
BnaA10g07180D	45.4178	-5.8196	0.90835	-5.44858	5.07746e-08	2.87576e-06
BnaA10g07730D	1071.75	2.9935	0.385384	7.76482	8.17589e-15	2.0519e-12
BnaA10g07760D	49.402	3.95998	0.655987	5.85199	4.85722e-09	3.62881e-07
BnaA10g07800D	27.3694	5.2608	0.952832	4.92484	8.44288e-07	3.39311e-05
BnaA10g07860D	97.5641	2.07398	0.516368	4.01082	6.05085e-05	0.00124133
BnaA10g07880D	63.2718	-6.27241	0.884088	-5.85297	4.82863e-09	3.61388e-07
BnaA10g08190D	42.6645	-5.72668	0.913929	-5.36387	8.14585e-08	4.38829e-06
BnaA10g08450D	385.095	-2.09124	0.725997	-2.88058	0.00396939	0.0329358
BnaA10g08660D	31.8565	2.45693	0.724639	3.36623	0.00076202	0.00937999
BnaA10g08850D	204.988	-7.38528	0.763415	-6.45234	1.10137e-10	1.19587e-08
BnaA10g08870D	34.1105	-2.76413	0.78755	-3.45507	0.000550147	0.00725544
BnaA10g08960D	32.3921	5.05034	0.890863	4.32749	1.50815e-05	0.000388982
BnaA10g09110D	18.094	-2.40115	0.844422	-2.79521	0.00518668	0.0402903
BnaA10g09260D	974.061	-2.3815	0.360499	-6.60418	3.99727e-11	4.85011e-09
BnaA10g09580D	29.9649	4.98934	0.888588	4.28212	1.85119e-05	0.000462377
BnaA10g09640D	1114.68	-4.55991	0.410618	-11.0787	1.59097e-28	2.22269e-25
BnaA10g10130D	324.353	2.13914	0.74266	2.88106	0.00396343	0.0329006
BnaA10g10850D	21.2672	3.66423	0.911851	3.77264	0.00016153	0.00271213
BnaA10g10940D	414.91	2.43583	0.354227	6.87292	6.29009e-12	9.34859e-10
BnaA10g11100D	250.104	2.34426	0.409063	5.72641	1.0258e-08	7.04806e-07
BnaA10g11570D	19.8764	-2.61402	0.817512	-3.12614	0.00177116	0.0179836
BnaA10g11660D	29.7518	-4.00703	0.913451	-3.98262	6.81599e-05	0.00136907
BnaA10g11680D	586.185	3.56996	0.354632	10.0536	8.85937e-24	7.14065e-21
BnaA10g12120D	1219.45	2.33456	0.48272	4.83572	1.32665e-06	5.05937e-05
BnaA10g13360D	7.9864	-3.01203	1.06385	-2.91034	0.00361041	0.0306602
BnaA10g13430D	11.4438	-3.19938	1.01198	-2.83987	0.00451316	0.0364251
BnaA10g13850D	83.0907	-2.59404	0.515323	-5.00811	5.4966e-07	2.34119e-05
BnaA10g14080D	34.6093	-3.22449	0.955389	-3.31342	0.000921619	0.0108605
BnaA10g14340D	233.464	2.43543	0.460266	5.28668	1.24556e-07	6.35857e-06
BnaA10g14470D	8.22208	3.24501	1.05967	3.13913	0.00169451	0.017396
BnaA10g14660D	535.254	-2.01991	0.345324	-5.84734	4.9951e-09	3.71855e-07
BnaA10g14740D	85.915	5.18344	0.635708	7.63742	2.21625e-14	5.36922e-12
BnaA10g15140D	158.12	4.29892	0.483442	8.78686	1.53802e-18	7.0067e-16
BnaA10g15370D	301.797	-2.16708	0.613932	-3.52782	0.000419005	0.00585403
BnaA10g15590D	83.3185	-2.17967	0.535173	-4.06192	4.86711e-05	0.00103654
BnaA10g15920D	30.3313	-2.73014	0.778049	-3.44854	0.000563632	0.00739836
BnaA10g16480D	72.9615	2.35298	0.843987	2.78682	0.00532276	0.0410389
BnaA10g16690D	289.062	-3.99693	0.730854	-5.4459	5.15447e-08	2.91151e-06
BnaA10g17050D	163.142	2.47503	0.671096	3.68462	0.00022904	0.00360342
BnaA10g17270D	253.431	-2.28721	0.532741	-4.28928	1.79251e-05	0.000450843
BnaA10g17370D	185.489	2.76115	0.520836	5.29269	1.20529e-07	6.16804e-06
BnaA10g17640D	142.207	-2.14398	0.634876	-3.37263	0.000744538	0.00920504
BnaA10g17940D	169.747	2.18093	0.62108	3.50901	0.00044978	0.00617677
BnaA10g18240D	17.4681	4.07579	0.95969	3.52283	0.000426972	0.00593613
BnaA10g18290D	367.523	4.88092	0.483133	10.0201	1.24386e-23	9.47866e-21
BnaA10g18330D	61.794	2.18008	0.542341	4.00906	6.09606e-05	0.00124801
BnaA10g18350D	133.533	2.34309	0.704474	3.3231	0.00089022	0.0105637
BnaA10g18370D	475.978	2.13736	0.433752	4.92619	8.38474e-07	3.3758e-05
BnaA10g18500D	131.814	4.75158	0.544291	8.52383	1.54359e-17	5.93532e-15
BnaA10g18810D	187.315	2.17545	0.663149	3.27888	0.00104218	0.0119084
BnaA10g19670D	559.91	3.82942	0.355664	10.7476	6.08184e-27	6.88924e-24
BnaA10g20270D	82.8126	2.22249	0.525079	4.22389	2.4012e-05	0.000576399
BnaA10g20610D	31.8301	-4.15648	0.926918	-3.99895	6.36244e-05	0.00129511
BnaA10g20630D	311.982	3.1489	0.471786	6.66426	2.65994e-11	3.37829e-09
BnaA10g20990D	17.9645	2.74975	0.967562	2.80372	0.00505167	0.0394789
BnaA10g21540D	101.72	2.98371	0.659423	4.50772	6.55287e-06	0.000196736
BnaA10g21860D	24.266	-3.0051	0.90077	-3.25044	0.00115225	0.0128953
BnaA10g22030D	13.0367	-2.88654	0.993716	-2.75504	0.00586847	0.0441185
BnaA10g22250D	34.4139	-2.27124	0.705514	-3.19246	0.00141065	0.0151288
BnaA10g22470D	45.8742	-2.23407	0.619286	-3.58714	0.000334322	0.00490189
BnaA10g22660D	13.1678	-3.22608	1.0079	-2.91895	0.0035121	0.03001
BnaA10g22680D	48.0468	-2.55326	0.636887	-3.97693	6.98117e-05	0.00139331
BnaA10g22750D	12.2241	-2.99601	0.95981	-2.90532	0.00366881	0.0310308
BnaA10g22800D	433.791	2.37098	0.344215	6.88496	5.7804e-12	8.71468e-10
BnaA10g23010D	14.7971	-3.23493	0.948037	-3.14844	0.00164142	0.0169823
BnaA10g23560D	57.8381	2.62708	0.600552	4.35238	1.3467e-05	0.000356367
BnaA10g23700D	48.4182	-5.44444	0.849674	-4.8018	1.57249e-06	5.85625e-05
BnaA10g24140D	138.924	-7.05677	0.86584	-6.48882	8.65123e-11	9.56702e-09
BnaA10g24160D	74.7365	2.69364	0.685287	3.91657	8.98181e-05	0.00170646
BnaA10g24340D	145.428	-7.27896	0.844038	-6.70747	1.98034e-11	2.58567e-09
BnaA10g24520D	18.9788	-3.41453	0.874616	-3.63029	0.000283098	0.00428501
BnaA10g24670D	24.896	-3.34273	0.823519	-3.87325	0.000107392	0.00196209
BnaA10g24680D	16.4436	-3.8409	0.959882	-3.39451	0.000687507	0.00866398
BnaA10g24710D	157.194	-2.32672	0.571654	-4.06388	4.82643e-05	0.00103049
BnaA10g24720D	110.476	-2.24173	0.540973	-4.1353	3.54486e-05	0.000800533
BnaA10g24990D	24.0121	-2.40332	0.84857	-2.80227	0.00507447	0.039635
BnaA10g25120D	96.1892	2.1947	0.554795	3.9495	7.83134e-05	0.0015302
BnaA10g25850D	144.446	-3.35045	0.589425	-5.65044	1.6004e-08	1.04643e-06
BnaA10g25990D	323.927	-3.00189	0.420224	-7.13049	1.00011e-12	1.71309e-10
BnaA10g26100D	120.724	-2.17082	0.609715	-3.55468	0.000378436	0.00541745
BnaA10g26680D	12.9594	3.07621	0.92843	3.14947	0.00163566	0.0169352
BnaA10g26870D	52.371	2.35945	0.751222	3.13094	0.0017425	0.0177649
BnaA10g26970D	215.44	3.61856	0.693133	5.20545	1.93527e-07	9.42055e-06
BnaA10g27370D	37.3448	-2.40896	0.667853	-3.57423	0.00035126	0.00509457
BnaA10g27410D	72.4991	-2.09217	0.532079	-3.91976	8.86356e-05	0.00168859
BnaA10g27420D	478.048	-2.47236	0.401881	-6.14791	7.85107e-10	7.06125e-08
BnaC01g00060D	37.5277	2.93808	0.723852	4.01257	6.00621e-05	0.00123338
BnaC01g00170D	209.758	-2.44355	0.493589	-4.94254	7.71094e-07	3.13463e-05
BnaC01g00280D	3176.4	-2.42153	0.299836	-8.07545	6.72258e-16	1.9842e-13
BnaC01g00680D	3875.69	2.39911	0.302295	7.93592	2.0894e-15	5.64975e-13
BnaC01g00770D	35.1826	2.59632	0.670094	3.84216	0.000121957	0.00217031
BnaC01g00790D	15.3957	-2.55664	0.89193	-2.79008	0.00526957	0.0407187
BnaC01g00800D	75.8319	-2.17767	0.565371	-3.84072	0.000122673	0.00218044
BnaC01g00990D	84.5645	-2.08591	0.596389	-3.48965	0.000483654	0.00654956
BnaC01g01140D	503.464	-2.35628	0.413507	-5.69549	1.23019e-08	8.3161e-07
BnaC01g01380D	23.5391	3.05437	0.782195	3.81379	0.00013685	0.00237895
BnaC01g01500D	440.088	-3.35236	1.06679	-4.15985	3.18456e-05	0.000733358
BnaC01g01590D	1036.5	-2.08853	0.368848	-5.66119	1.50331e-08	9.87564e-07
BnaC01g01790D	198.567	-2.81561	0.681223	-4.12677	3.67892e-05	0.000825024
BnaC01g02370D	206.083	2.51372	0.646238	3.88665	0.000101636	0.0018782
BnaC01g02640D	38.7652	2.61747	0.641178	4.05067	5.10719e-05	0.00107944
BnaC01g02910D	156.664	-2.19701	0.655309	-3.34858	0.000812282	0.00986736
BnaC01g02930D	420.017	-2.88823	0.657804	-4.38762	1.14596e-05	0.000312489
BnaC01g03210D	14.386	2.795	0.881668	3.07974	0.00207179	0.0202313
BnaC01g03230D	21.407	2.2631	0.794856	2.82372	0.00474704	0.0377601
BnaC01g03270D	17.7284	-4.37373	0.997055	-4.1229	3.74139e-05	0.000834535
BnaC01g03360D	124.315	-2.71176	0.692725	-3.90339	9.48559e-05	0.00178198
BnaC01g03420D	31.871	2.12292	0.774538	2.72984	0.00633649	0.0465431
BnaC01g03720D	32.1763	-3.33617	0.836241	-3.86561	0.000110811	0.00201488
BnaC01g03730D	39.8212	-3.61176	0.74383	-4.68492	2.80069e-06	9.59793e-05
BnaC01g04140D	1212.65	2.17611	0.432833	5.02705	4.9807e-07	2.16322e-05
BnaC01g04180D	173.415	2.10127	0.397294	5.28457	1.26002e-07	6.40899e-06
BnaC01g04250D	145.641	-3.00818	0.686627	-4.36888	1.24885e-05	0.00033631
BnaC01g04460D	3206.38	7.73686	0.390736	19.569	2.84139e-85	1.19088e-80
BnaC01g04590D	78.1447	-2.74657	0.860737	-3.18393	0.00145291	0.0154554
BnaC01g05300D	7889.5	-2.41587	0.558755	-4.32397	1.53243e-05	0.000394032
BnaC01g05710D	34.7198	2.72153	0.677275	3.97868	6.92993e-05	0.00138572
BnaC01g05900D	37.5883	2.16743	0.72592	2.97416	0.0029379	0.0262459
BnaC01g06040D	137.856	4.24201	0.653279	6.41449	1.41297e-10	1.48567e-08
BnaC01g06390D	186.892	-3.88609	0.492888	-7.81632	5.4392e-15	1.4248e-12
BnaC01g06400D	53.2743	-4.64985	0.777272	-5.45703	4.84163e-08	2.75335e-06
BnaC01g06410D	192.861	-3.69935	0.574692	-6.39374	1.61877e-10	1.67521e-08
BnaC01g06420D	49.389	-5.42964	0.844406	-4.82379	1.40859e-06	5.31863e-05
BnaC01g06430D	535.29	-3.21413	0.34188	-9.38843	6.08988e-21	3.44918e-18
BnaC01g06460D	197.335	-2.82007	0.415912	-6.76262	1.35514e-11	1.82626e-09
BnaC01g06470D	134.205	-7.31216	0.831257	-6.76758	1.3095e-11	1.78195e-09
BnaC01g06500D	28.5213	-5.10542	0.952711	-4.79335	1.64022e-06	6.05149e-05
BnaC01g06660D	82.871	-3.26662	0.668303	-4.83842	1.30874e-06	5.00016e-05
BnaC01g07050D	16.9567	-3.4451	0.930999	-3.37692	0.000733022	0.00909318
BnaC01g07630D	9.39291	3.07038	1.02703	2.70969	0.00673459	0.0485818
BnaC01g08060D	74.0806	2.08261	0.533814	3.89401	9.86025e-05	0.00183505
BnaC01g08150D	9.02986	3.41593	1.05338	3.28448	0.00102169	0.0117351
BnaC01g08180D	23.5369	2.2321	0.775961	2.85521	0.00430087	0.0350833
BnaC01g08790D	67.2555	2.21077	0.549029	4.01665	5.90312e-05	0.00121818
BnaC01g08910D	60.7051	-3.37684	0.662513	-5.01089	5.41797e-07	2.3177e-05
BnaC01g09700D	33.7915	5.6112	0.930083	5.24622	1.55252e-07	7.72792e-06
BnaC01g09790D	229.755	5.37615	0.613815	8.55324	1.1968e-17	4.82312e-15
BnaC01g10070D	52.1125	-2.44753	0.615996	-3.94723	7.90603e-05	0.0015412
BnaC01g10100D	66.9175	-3.23745	0.907482	-3.55883	0.00037251	0.0053578
BnaC01g10220D	29.811	-4.37665	0.846642	-4.46159	8.13538e-06	0.000235477
BnaC01g10230D	113.117	-2.69231	0.473058	-5.66829	1.44227e-08	9.53323e-07
BnaC01g10250D	25.9627	-4.98735	0.958762	-4.68702	2.77216e-06	9.52352e-05
BnaC01g11330D	42.6052	-2.06912	0.613759	-3.35433	0.000795582	0.00969879
BnaC01g11610D	88.7291	-2.45111	0.756154	-3.23393	0.00122101	0.0135312
BnaC01g11690D	149.651	-3.50695	0.551906	-6.30885	2.8112e-10	2.74007e-08
BnaC01g12280D	11.1182	3.71941	1.0413	3.55164	0.000382843	0.00545958
BnaC01g12350D	13.0731	-3.50586	1.04981	-3.37647	0.000734212	0.00909756
BnaC01g12410D	34.82	-3.06292	0.789924	-3.79882	0.000145384	0.00248911
BnaC01g12430D	31.6541	4.63962	0.865902	4.64231	3.44529e-06	0.000114059
BnaC01g12520D	11.303	-3.49238	1.04718	-3.33988	0.000838155	0.0100749
BnaC01g12530D	75.2483	-2.36548	0.52551	-4.48254	7.37598e-06	0.000217859
BnaC01g12820D	76.0286	-2.08973	0.577193	-3.6105	0.000305606	0.00456796
BnaC01g12930D	50.084	-4.83401	0.788963	-5.4048	6.48794e-08	3.6064e-06
BnaC01g13250D	22.0207	-2.93849	0.903413	-3.16098	0.00157238	0.0164039
BnaC01g13420D	219.949	-3.40883	0.58544	-5.80241	6.53671e-09	4.67082e-07
BnaC01g14160D	28.9542	-3.1086	1.04773	-2.96831	0.00299439	0.0266399
BnaC01g14560D	14.28	-4.02666	1.01719	-3.80679	0.000140782	0.00243017
BnaC01g14610D	67.0379	-2.50103	0.626625	-3.97052	7.17168e-05	0.00142387
BnaC01g14690D	21.9185	-3.35342	0.834143	-3.80683	0.000140759	0.00243017
BnaC01g14850D	16.4057	-3.18773	0.895447	-3.33917	0.000840288	0.0100854
BnaC01g14860D	63.9778	-2.64535	0.584766	-4.49215	7.05073e-06	0.000209582
BnaC01g15050D	46.6835	-2.04915	0.62419	-3.26704	0.00108677	0.0123071
BnaC01g15510D	10.3659	3.04155	0.971372	2.9265	0.003428	0.0294595
BnaC01g15520D	34.1312	-2.99586	0.969566	-3.07688	0.0020918	0.0203793
BnaC01g15710D	79.1942	-2.19181	0.506027	-4.3177	1.57662e-05	0.000403661
BnaC01g15870D	112.614	-2.27199	0.542121	-4.18089	2.90366e-05	0.000678163
BnaC01g16150D	45.899	-4.0271	0.747027	-5.12182	3.02602e-07	1.3876e-05
BnaC01g16250D	11.6103	-3.35449	1.05509	-3.24107	0.0011908	0.0132666
BnaC01g17280D	95.4789	-2.20492	0.489114	-4.4964	6.91123e-06	0.000206313
BnaC01g17340D	102.108	5.81048	0.725364	7.15387	8.43628e-13	1.47942e-10
BnaC01g17520D	96.0194	2.34639	0.507238	4.61603	3.91155e-06	0.000127086
BnaC01g17810D	140.367	-2.78082	0.610411	-4.54042	5.61417e-06	0.000172762
BnaC01g18220D	21.3448	-2.96055	1.03661	-2.821	0.00478749	0.0379737
BnaC01g18700D	97.7147	-6.73701	0.869809	-6.23784	4.43644e-10	4.20679e-08
BnaC01g18730D	749.801	-8.95697	0.733355	-7.71347	1.22439e-14	3.0365e-12
BnaC01g18770D	49.0073	-2.00792	0.663977	-3.01444	0.00257457	0.0238028
BnaC01g19160D	94.008	-2.23284	0.576418	-3.8631	0.000111957	0.00203219
BnaC01g19170D	280.223	-2.34151	0.45738	-5.11415	3.1515e-07	1.43884e-05
BnaC01g19210D	14.5935	-2.69396	0.90262	-2.88293	0.00393994	0.032751
BnaC01g19280D	25.6934	-2.14854	0.762557	-2.79511	0.00518828	0.0402903
BnaC01g19470D	406.086	-2.22033	0.367991	-6.02998	1.63976e-09	1.37177e-07
BnaC01g19640D	265.139	-2.42421	0.45155	-5.3629	8.18974e-08	4.40627e-06
BnaC01g19760D	110.822	-2.96886	0.640718	-4.61128	4.0019e-06	0.000129519
BnaC01g20160D	7.03263	2.96938	1.06757	2.90611	0.00365947	0.0309725
BnaC01g20390D	54.8537	-2.25111	0.663923	-3.37401	0.00074082	0.00916718
BnaC01g20930D	11.3735	-3.17052	1.00005	-2.86585	0.00415887	0.0341443
BnaC01g21320D	115.924	5.76185	0.635568	8.31478	9.19224e-17	3.18401e-14
BnaC01g21880D	27.329	-3.82481	0.871867	-4.05174	5.08383e-05	0.00107559
BnaC01g21920D	10916.2	-2.41689	0.395874	-6.10511	1.0273e-09	8.9143e-08
BnaC01g22110D	157.319	2.5772	0.469945	5.47518	4.3706e-08	2.51968e-06
BnaC01g22400D	1145.75	2.35378	0.529142	4.44788	8.67205e-06	0.00024946
BnaC01g22420D	9.40936	3.49886	1.04993	3.35459	0.000794819	0.00969421
BnaC01g22480D	33.3755	2.42165	0.807237	2.98267	0.00285746	0.0256834
BnaC01g22560D	7.7917	-3.01027	1.06358	-2.90389	0.00368552	0.0311301
BnaC01g22910D	71.9495	2.55062	0.863331	2.95338	0.00314317	0.0276235
BnaC01g23300D	86.0153	5.60959	0.727066	6.90604	4.98366e-12	7.59545e-10
BnaC01g24110D	152.41	-2.00175	0.704867	-2.83799	0.00453987	0.0365562
BnaC01g24930D	609.442	2.32762	0.322618	7.21262	5.48855e-13	1.02695e-10
BnaC01g25850D	32.0786	2.30343	0.79167	2.89463	0.00379602	0.0318772
BnaC01g26100D	51.1514	-5.96358	0.901783	-5.57451	2.48232e-08	1.55282e-06
BnaC01g26550D	12.9074	-2.46702	1.07205	-2.71765	0.0065748	0.0477993
BnaC01g27330D	33.5853	-5.08356	0.966264	-4.7591	1.94463e-06	6.99598e-05
BnaC01g27440D	145.335	2.1983	0.448675	4.89404	9.8788e-07	3.89136e-05
BnaC01g27610D	526.473	-3.45141	0.542468	-6.35203	2.12488e-10	2.13057e-08
BnaC01g28000D	13.3273	-3.5367	1.04859	-3.403	0.000666494	0.00846231
BnaC01g28060D	1694.44	2.49424	0.393404	6.3394	2.30669e-10	2.28553e-08
BnaC01g28200D	7.7917	-3.01027	1.06358	-2.90389	0.00368552	0.0311301
BnaC01g28600D	31.0159	2.25371	0.678016	3.30401	0.000953108	0.0111396
BnaC01g28900D	9178.96	2.19979	0.324066	6.788	1.13701e-11	1.56757e-09
BnaC01g29280D	85.5177	2.83827	0.675506	4.18556	2.84465e-05	0.000666433
BnaC01g30550D	29.3576	2.43206	0.841443	2.87226	0.00407544	0.0336372
BnaC01g30760D	167.13	3.08246	0.540717	5.68502	1.30801e-08	8.7714e-07
BnaC01g30790D	12.9282	-3.71038	1.03728	-3.53181	0.00041273	0.00578928
BnaC01g30800D	29.2828	2.67031	0.80695	3.27603	0.00105276	0.0119965
BnaC01g30940D	8.50616	3.31684	1.0571	3.19879	0.00138004	0.0148842
BnaC01g31270D	217.171	2.24886	0.494561	4.54372	5.52691e-06	0.000170452
BnaC01g31360D	24.7552	5.07315	0.965506	4.7533	2.00127e-06	7.16288e-05
BnaC01g31820D	299.191	-2.37273	0.563118	-4.21027	2.55064e-05	0.000607102
BnaC01g31890D	178.67	3.14407	0.458707	6.83457	8.22536e-12	1.18062e-09
BnaC01g32280D	15.052	3.30172	0.909143	3.42491	0.000615005	0.00793354
BnaC01g32990D	222.025	2.32609	0.473477	4.90887	9.16035e-07	3.63225e-05
BnaC01g33140D	17.3502	-3.10514	1.06802	-3.19631	0.00139198	0.0149937
BnaC01g33290D	40.1668	-5.00182	0.983794	-4.69294	2.69302e-06	9.305e-05
BnaC01g33490D	17.5876	-2.76852	0.960137	-2.80208	0.0050774	0.0396431
BnaC01g33560D	52.4019	2.78623	0.600775	4.60567	4.11145e-06	0.000132451
BnaC01g35440D	7.17683	2.98926	1.06714	2.92513	0.00344315	0.0295655
BnaC01g35450D	17.0145	4.51193	0.997186	4.2491	2.14629e-05	0.000523605
BnaC01g35820D	201.908	2.18899	0.406902	5.37545	7.63925e-08	4.15274e-06
BnaC01g36040D	48.6585	-5.60996	0.937832	-5.22672	1.72548e-07	8.45828e-06
BnaC01g36220D	10.2715	-2.65745	1.07269	-2.74505	0.00605013	0.0451037
BnaC01g36360D	129.097	2.93187	0.798645	3.66714	0.000245274	0.00381445
BnaC01g36380D	58.1131	-3.84263	0.99906	-3.78257	0.000155216	0.00262103
BnaC01g36500D	65.8065	2.85559	0.606913	4.67816	2.89461e-06	9.85531e-05
BnaC01g36550D	126.709	-2.77535	0.647192	-4.27383	1.92147e-05	0.00047693
BnaC01g36990D	69.1675	2.14952	0.532147	4.03008	5.57583e-05	0.00116121
BnaC01g37180D	23.5519	-3.16745	1.06821	-3.34693	0.000817121	0.00990375
BnaC01g37450D	29.1612	-2.77969	0.895787	-3.06805	0.00215457	0.0208503
BnaC01g37460D	144.636	2.90285	0.461481	6.27308	3.53981e-10	3.41845e-08
BnaC01g37590D	76.5493	4.37912	0.610797	6.9579	3.4538e-12	5.36132e-10
BnaC01g38510D	71.5943	-3.49377	0.584477	-5.88069	4.08564e-09	3.13048e-07
BnaC01g38610D	79.1589	3.34266	0.540266	6.1327	8.64e-10	7.68831e-08
BnaC01g38670D	38.9832	-3.20303	1.05253	-3.11491	0.00184003	0.0185161
BnaC01g38680D	67.5757	-3.16311	1.02742	-3.17492	0.00149877	0.015787
BnaC01g38880D	90.7673	2.10616	0.548132	3.83656	0.00012477	0.00221285
BnaC01g39160D	25.675	-3.64374	0.886294	-3.84824	0.000118971	0.00213248
BnaC01g39170D	63.7929	-4.35507	0.811096	-5.10993	3.22271e-07	1.46497e-05
BnaC01g39240D	98.4513	-2.94525	0.707418	-4.14369	3.41762e-05	0.000778897
BnaC01g39340D	114.544	-2.55212	0.461951	-5.50565	3.67812e-08	2.16817e-06
BnaC01g40070D	45.3632	2.35946	0.660978	3.55384	0.000379651	0.00542885
BnaC01g40110D	31.1282	-5.2516	0.94304	-4.9287	8.27786e-07	3.3424e-05
BnaC01g40250D	14.1971	-3.24001	1.02591	-2.88971	0.00385596	0.0321935
BnaC01g40350D	31.6869	-3.6137	0.870112	-3.96616	7.30392e-05	0.00144534
BnaC01g40540D	30.0525	-3.72436	0.977082	-3.56664	0.000361585	0.00522577
BnaC01g40620D	16.6231	-2.90001	1.07144	-3.0616	0.00220155	0.0211486
BnaC01g40640D	9.3913	-2.68658	1.07235	-2.73336	0.00626916	0.0462186
BnaC02g00700D	35.4913	2.22959	0.798916	2.78001	0.00543573	0.0416038
BnaC02g01100D	171.611	2.05778	0.511324	4.02156	5.7815e-05	0.00119602
BnaC02g02140D	37.6395	-2.08426	0.650534	-3.18428	0.00145117	0.0154486
BnaC02g02240D	145.114	3.1157	0.454345	6.83358	8.2821e-12	1.18471e-09
BnaC02g02260D	39.0401	2.03683	0.645359	3.14539	0.00165865	0.017115
BnaC02g02570D	268.724	6.34962	0.680495	8.79316	1.45416e-18	6.69743e-16
BnaC02g02670D	55.5444	6.2735	0.896501	5.83081	5.51593e-09	4.04168e-07
BnaC02g02700D	29.7132	4.56511	0.866168	4.57828	4.68818e-06	0.000148632
BnaC02g02960D	166.174	5.54301	0.54071	9.81738	9.4776e-23	6.30516e-20
BnaC02g03130D	196.716	-2.12351	0.44778	-4.73716	2.16732e-06	7.65908e-05
BnaC02g03260D	9.21854	3.44758	1.05225	3.31193	0.000926545	0.010893
BnaC02g03510D	22.1939	-4.55641	0.992296	-4.28775	1.80489e-05	0.000452433
BnaC02g03540D	13.2874	3.12307	0.923885	3.20602	0.00134585	0.0145679
BnaC02g03800D	313.734	7.99036	0.68625	8.55373	1.19178e-17	4.82312e-15
BnaC02g03860D	36.904	2.50327	0.736012	3.37956	0.000726031	0.00902682
BnaC02g04400D	24.2007	4.22652	0.894548	4.18628	2.83559e-05	0.000665428
BnaC02g04420D	8.93445	3.4052	1.05373	3.27434	0.00105911	0.0120656
BnaC02g04450D	145.055	2.56085	0.844643	3.03506	0.00240485	0.0226449
BnaC02g04510D	19.105	4.72078	0.984129	4.43755	9.09868e-06	0.000258713
BnaC02g04710D	18.6001	3.07966	0.949722	3.15396	0.00161072	0.0167265
BnaC02g05070D	957.843	6.17006	0.48886	12.4941	8.04359e-36	1.60535e-32
BnaC02g05960D	27.6901	4.84942	0.899531	4.16584	3.10203e-05	0.000717111
BnaC02g05990D	95.211	4.55441	0.804967	5.50925	3.60373e-08	2.1424e-06
BnaC02g06070D	21.9267	3.35464	0.924161	3.50164	0.000462405	0.00631898
BnaC02g06370D	243.734	5.96215	0.720247	7.92044	2.36672e-15	6.32866e-13
BnaC02g06380D	428.662	7.44513	0.627985	10.6568	1.62048e-26	1.76856e-23
BnaC02g06990D	520.973	2.20542	0.575575	3.83099	0.00012763	0.00225175
BnaC02g07120D	424.807	2.17748	0.523282	4.15999	3.18264e-05	0.000733319
BnaC02g07910D	194.271	-3.90179	0.79789	-4.86648	1.13606e-06	4.41285e-05
BnaC02g07930D	20.5873	-2.50808	0.906944	-2.71949	0.00653829	0.0476248
BnaC02g08040D	63.5754	2.50076	0.751537	3.31773	0.000907528	0.0107205
BnaC02g08070D	66.4466	2.66268	0.634154	4.18083	2.90443e-05	0.000678163
BnaC02g08300D	100.544	3.94618	0.599599	6.49671	8.20974e-11	9.12696e-09
BnaC02g08620D	823.807	2.19067	0.682828	3.20885	0.00133268	0.0144553
BnaC02g08960D	53.8417	3.18124	0.675037	4.66352	3.10847e-06	0.000104982
BnaC02g09400D	47.1846	-4.40433	0.782526	-5.19899	2.00379e-07	9.70898e-06
BnaC02g09410D	19.6335	2.75638	0.885066	3.06212	0.00219775	0.021117
BnaC02g09500D	364.027	3.64048	0.882791	4.14992	3.32586e-05	0.000761296
BnaC02g10540D	203.779	2.18074	0.57842	3.76785	0.00016466	0.00275169
BnaC02g10970D	12.3344	-3.78252	1.03057	-3.58648	0.000335178	0.00490961
BnaC02g10990D	22.5929	-4.44411	1.0031	-4.19048	2.78362e-05	0.000655064
BnaC02g11010D	31.2418	-2.26192	0.804896	-2.78398	0.00536964	0.0412562
BnaC02g11130D	34.1383	-3.17197	0.937567	-3.31324	0.000922212	0.0108605
BnaC02g11200D	2575.93	2.28164	0.422965	5.39412	6.88603e-08	3.79746e-06
BnaC02g11230D	6.22484	2.76066	1.07133	2.7307	0.00632005	0.046463
BnaC02g11570D	1036.69	-2.38947	0.42011	-5.68632	1.2981e-08	8.71889e-07
BnaC02g12030D	713.937	-2.65693	0.405168	-6.55427	5.59134e-11	6.54593e-09
BnaC02g12590D	160.599	2.64035	0.720125	3.66318	0.000249107	0.00386398
BnaC02g12960D	151.514	-3.52676	0.640555	-5.47344	4.4139e-08	2.54115e-06
BnaC02g13050D	104.29	-2.71536	0.525613	-5.14461	2.6808e-07	1.25399e-05
BnaC02g13690D	69.3848	-2.8781	1.01843	-2.89791	0.00375658	0.0315902
BnaC02g14170D	258.204	2.12225	0.497056	4.26743	1.97737e-05	0.000488076
BnaC02g14350D	64.7132	3.3108	0.782056	4.19788	2.69424e-05	0.000636533
BnaC02g14810D	17.086	2.69469	0.97238	2.73431	0.00625115	0.0461021
BnaC02g15500D	31.3029	5.01943	0.889818	4.30597	1.66253e-05	0.000422303
BnaC02g15990D	92.5836	2.17237	0.54429	3.98457	6.76028e-05	0.00136089
BnaC02g16010D	44.7501	-3.43606	1.05226	-3.33611	0.000849581	0.0101678
BnaC02g16100D	80.5315	2.22906	0.554293	4.01318	5.99061e-05	0.00123139
BnaC02g16390D	7.39265	-2.79896	1.06955	-2.73886	0.00616531	0.0456942
BnaC02g16610D	44.6659	-3.0436	0.751507	-3.99237	6.54171e-05	0.00132388
BnaC02g16950D	28.2506	-2.32205	0.763937	-3.00534	0.00265281	0.0242867
BnaC02g17130D	90.1535	-2.0118	0.543879	-3.69163	0.000222823	0.00353079
BnaC02g17620D	31.0618	2.58176	0.734874	3.48206	0.000497581	0.0066949
BnaC02g18430D	93.5049	2.68895	0.519632	5.15775	2.49939e-07	1.18233e-05
BnaC02g18560D	52.1434	2.23511	0.671547	3.3181	0.00090633	0.0107124
BnaC02g19240D	31.0229	2.80539	0.701516	3.94926	7.83929e-05	0.00153104
BnaC02g19920D	25.9541	-2.16886	0.72375	-2.9681	0.00299649	0.026653
BnaC02g21080D	856.612	-2.00865	0.52598	-3.81821	0.000134426	0.0023485
BnaC02g21220D	20.5895	-2.4016	0.793936	-2.97392	0.00294023	0.02625
BnaC02g22000D	67.6166	-3.04994	0.802804	-3.77061	0.000162847	0.00272901
BnaC02g22990D	72.6724	2.49355	0.903409	2.76423	0.00570573	0.0432204
BnaC02g23100D	11.1491	-2.86975	0.968086	-2.77422	0.00553338	0.0422
BnaC02g23290D	16.9552	-3.1386	1.04514	-2.84847	0.00439306	0.0356825
BnaC02g23320D	301.963	-2.36826	0.376327	-6.28698	3.23709e-10	3.14058e-08
BnaC02g23550D	437.198	2.20164	0.59589	3.69396	0.000220788	0.00350724
BnaC02g25030D	53.4711	6.22516	0.898375	5.79034	7.02427e-09	4.98141e-07
BnaC02g25110D	66.1848	-4.23168	1.02411	-3.8909	9.98712e-05	0.00185459
BnaC02g25370D	20.6461	3.24851	0.934417	3.36522	0.00076483	0.00940873
BnaC02g25950D	670.915	-3.1857	0.532176	-5.98133	2.21317e-09	1.79764e-07
BnaC02g26910D	24.2187	-2.51671	0.798749	-3.09781	0.00194958	0.0193366
BnaC02g26990D	13.3819	-3.26799	1.00414	-2.95374	0.00313951	0.0276087
BnaC02g27740D	22.0992	-2.85709	1.07237	-3.15151	0.00162428	0.0168382
BnaC02g28290D	102.949	4.44509	0.683723	6.36002	2.01727e-10	2.04222e-08
BnaC02g29210D	31.4323	-3.07609	0.76658	-3.91997	8.85591e-05	0.00168816
BnaC02g29940D	25.911	-3.40567	1.06286	-3.51694	0.000436546	0.00604644
BnaC02g30560D	46.9754	-3.77116	0.780539	-4.66273	3.12037e-06	0.000105199
BnaC02g31860D	44.5984	5.55152	0.85638	4.74553	2.07964e-06	7.40542e-05
BnaC02g32000D	61.4364	2.70232	0.844223	3.19348	0.00140568	0.0150864
BnaC02g32740D	1558.1	2.04137	0.379965	5.37214	7.78085e-08	4.19753e-06
BnaC02g32780D	113.084	-2.75467	0.923821	-2.99285	0.00276385	0.0250625
BnaC02g33470D	38.3326	2.3855	0.657956	3.60526	0.000311844	0.00464298
BnaC02g33630D	49.5921	3.33679	0.657721	5.00065	5.71365e-07	2.42379e-05
BnaC02g33920D	47.6739	-5.87082	0.906561	-5.49207	3.97257e-08	2.3254e-06
BnaC02g33960D	9.80485	-3.07376	1.06418	-3.00182	0.00268367	0.0245053
BnaC02g34040D	67.4811	6.65933	0.868199	6.19328	5.89245e-10	5.40543e-08
BnaC02g34260D	17.2606	-3.01373	0.940634	-3.07062	0.00213611	0.0207147
BnaC02g34830D	18.0827	3.39487	0.936356	3.44042	0.000580817	0.00758119
BnaC02g35140D	90.3769	-3.95207	0.677887	-5.70731	1.14775e-08	7.79651e-07
BnaC02g35150D	296.865	-5.08368	0.693018	-7.20525	5.79386e-13	1.07925e-10
BnaC02g35940D	52.3445	-3.46491	0.840085	-4.05586	4.99511e-05	0.00106003
BnaC02g35960D	591.762	-2.06387	0.420122	-4.91092	9.06522e-07	3.59793e-05
BnaC02g35980D	1069.06	-2.1988	0.407472	-5.39511	6.84826e-08	3.78161e-06
BnaC02g36170D	29.8909	-4.48045	1.01191	-4.2502	2.13578e-05	0.000521345
BnaC02g36290D	867.617	-3.5227	0.540606	-6.51048	7.49129e-11	8.41756e-09
BnaC02g36400D	238.294	2.665	0.601891	4.42349	9.71194e-06	0.000272637
BnaC02g36920D	39.3962	-5.61653	0.920087	-5.26444	1.40621e-07	7.06677e-06
BnaC02g36990D	31.6043	2.07671	0.687014	3.00903	0.00262085	0.0241024
BnaC02g37020D	44.8572	-2.48616	0.807807	-3.06063	0.00220874	0.0211982
BnaC02g37270D	42.4979	5.12425	0.824577	5.23217	1.67531e-07	8.24124e-06
BnaC02g37280D	57.8432	5.65551	0.778878	5.90093	3.61459e-09	2.78996e-07
BnaC02g37820D	108.011	-2.38818	0.600534	-3.96602	7.3084e-05	0.00144554
BnaC02g38230D	30.3101	-2.85373	0.840466	-3.33194	0.000862437	0.0102893
BnaC02g38250D	46.1014	2.54987	0.653431	3.88021	0.000104365	0.00192186
BnaC02g39050D	125.25	-2.46611	0.47748	-5.15017	2.60248e-07	1.22281e-05
BnaC02g39080D	120.552	3.79056	0.546806	6.87039	6.40247e-12	9.482e-10
BnaC02g39100D	524.308	8.40041	0.645034	10.2808	8.60112e-25	7.67001e-22
BnaC02g39110D	1084.6	10.1756	0.7456	9.0952	9.4413e-20	4.71076e-17
BnaC02g39140D	370.485	2.42864	0.363728	6.67326	2.50178e-11	3.19678e-09
BnaC02g39190D	22.7922	3.96282	0.8509	4.27796	1.88618e-05	0.000469996
BnaC02g39560D	253.381	-7.95737	0.820006	-7.27093	3.57021e-13	6.86398e-11
BnaC02g39570D	42.0788	4.25189	0.728626	5.53085	3.1868e-08	1.91904e-06
BnaC02g39680D	25.4967	-2.96397	1.06495	-2.8602	0.0042337	0.0346028
BnaC02g39850D	39.636	2.24817	0.71909	3.11408	0.00184521	0.0185548
BnaC02g39910D	306.071	8.65145	0.78407	7.88604	3.1192e-15	8.22214e-13
BnaC02g40320D	54.4652	4.21963	0.659004	6.1673	6.94651e-10	6.26112e-08
BnaC02g40760D	15.9375	-3.02545	1.01307	-2.83138	0.00463483	0.0371141
BnaC02g41180D	13.4108	2.90278	0.903249	3.09672	0.00195677	0.0193974
BnaC02g41700D	44.121	-2.3734	0.693391	-3.40258	0.000667526	0.00847029
BnaC02g41790D	13.9196	-3.77986	1.0349	-3.59717	0.000321701	0.0047526
BnaC02g42250D	53.4147	2.17794	0.670737	3.23848	0.00120169	0.0133701
BnaC02g42260D	140.777	-3.43445	0.526509	-6.47663	9.37938e-11	1.02908e-08
BnaC02g42350D	43.7685	2.34894	0.66243	3.52987	0.000415759	0.00582143
BnaC02g42410D	152.626	-4.5182	0.676791	-6.54285	6.03567e-11	7.00739e-09
BnaC02g42580D	386.829	2.67409	0.504232	5.29983	1.15912e-07	5.96818e-06
BnaC02g42680D	38.8562	-3.17169	0.707952	-4.38599	1.15459e-05	0.000314434
BnaC02g42720D	720.624	-2.7225	0.574436	-4.73735	2.16536e-06	7.65862e-05
BnaC02g42730D	247.037	-2.61933	0.499402	-5.23701	1.63202e-07	8.07569e-06
BnaC02g42830D	30.5241	-2.86168	0.840831	-3.3397	0.000838691	0.0100749
BnaC02g42910D	53.5481	2.04673	0.692631	2.94872	0.00319098	0.027944
BnaC02g42930D	27.0074	-2.97791	0.981197	-2.99938	0.00270526	0.0246645
BnaC02g43120D	109.63	-3.69756	0.558312	-6.53757	6.25246e-11	7.19926e-09
BnaC02g43280D	168.43	2.04322	0.423385	4.82214	1.42028e-06	5.35314e-05
BnaC02g43320D	22.5625	-2.94645	0.925767	-3.09296	0.00198169	0.0195796
BnaC02g43750D	41.3642	2.45801	0.741877	3.29658	0.0009787	0.0113784
BnaC03g00040D	1057.02	2.07427	0.473929	4.37634	1.20686e-05	0.000326968
BnaC03g01810D	13.1755	2.85524	0.910687	3.02767	0.00246446	0.0230456
BnaC03g01900D	48.2149	-2.19672	0.787919	-2.7742	0.00553377	0.0422
BnaC03g01960D	317.277	-2.9635	0.412203	-7.17683	7.13448e-13	1.30009e-10
BnaC03g02030D	28.0464	-3.41677	0.970402	-3.38058	0.000723336	0.00901203
BnaC03g02700D	20.7338	3.71502	0.96417	3.56781	0.000359971	0.00520784
BnaC03g03450D	47.4306	6.13154	0.898656	5.71839	1.07539e-08	7.35267e-07
BnaC03g03620D	62.4593	-3.83209	0.747383	-4.98593	6.16657e-07	2.58453e-05
BnaC03g03740D	219.533	-2.28998	0.392226	-5.83099	5.51002e-09	4.04168e-07
BnaC03g03750D	442.779	-3.04093	0.549583	-5.52634	3.26987e-08	1.96061e-06
BnaC03g04060D	20.2856	-3.99015	1.03253	-3.81833	0.000134358	0.0023483
BnaC03g04070D	21.219	-3.08316	1.06941	-3.25902	0.00111798	0.0125981
BnaC03g04190D	51.9234	-3.57452	1.00503	-3.55901	0.000372249	0.00535589
BnaC03g04230D	389.516	-4.53071	0.67396	-6.67718	2.43582e-11	3.1316e-09
BnaC03g04240D	443.657	-3.16994	0.822525	-3.86097	0.000112936	0.00204465
BnaC03g04250D	88.7534	-5.89282	0.778847	-6.08317	1.17829e-09	1.00579e-07
BnaC03g04400D	53.1506	-4.16079	0.991691	-3.93349	8.37214e-05	0.00161776
BnaC03g04410D	41.7842	-2.25324	0.75462	-2.96643	0.00301279	0.0267752
BnaC03g04590D	92.219	-2.12891	0.64608	-3.28881	0.0010061	0.0115973
BnaC03g04760D	50.2599	2.11599	0.696991	3.02799	0.00246189	0.023037
BnaC03g05510D	29.3451	4.19995	0.863135	4.46872	7.86886e-06	0.000229506
BnaC03g05820D	58.7362	-2.67179	0.68396	-3.87658	0.000105935	0.00194393
BnaC03g05850D	36.0681	-3.14299	0.697248	-4.4029	1.06816e-05	0.000295502
BnaC03g06120D	366.934	3.40898	0.449154	7.57667	3.54527e-14	8.25497e-12
BnaC03g07000D	10.7198	2.7561	0.962777	2.75488	0.00587132	0.0441195
[truncated: 1,235 more rows]

## Sheet: DEGs_stem
gene	baseMean	log2FoldChange	lfcSE	stat	pvalue	padj
BnaA01g00150D	39.135	-2.27723	0.486424	-4.63688	3.53704e-06	3.13783e-05
BnaA01g00430D	38.8004	-2.54957	0.485318	-5.17991	2.21998e-07	2.42424e-06
BnaA01g00480D	185.157	-7.28686	0.566989	-6.87164	6.34684e-12	1.36406e-10
BnaA01g00520D	329.314	-7.19386	0.445016	-12.9903	1.38955e-38	1.86314e-36
BnaA01g00600D	830.984	-2.21513	0.156957	-14.1078	3.40261e-45	6.05629e-43
BnaA01g00680D	146.993	3.27101	0.314029	10.277	8.94968e-25	5.90597e-23
BnaA01g00690D	5.18538	2.10698	0.799885	2.7776	0.00547613	0.0220726
BnaA01g00900D	26.1036	-3.34708	0.599433	-5.2447	1.56533e-07	1.75019e-06
BnaA01g01000D	21.0684	2.56184	0.626353	3.91091	9.19504e-05	0.000610695
BnaA01g01280D	59.2002	4.45154	0.547864	7.05498	1.72625e-12	3.96997e-11
BnaA01g01570D	731.867	2.01879	0.156445	12.8968	4.68882e-38	6.12442e-36
BnaA01g02890D	137.084	2.4064	0.305428	7.83775	4.5869e-15	1.41639e-13
BnaA01g04810D	22.6244	-4.68258	0.718638	-5.23917	1.61296e-07	1.79907e-06
BnaA01g05220D	131.402	-2.44969	0.291479	-8.37529	5.50862e-17	2.03996e-15
BnaA01g05240D	795.869	2.15136	0.156316	13.7546	4.78181e-43	7.67351e-41
BnaA01g05440D	55.2239	5.57052	0.669151	6.01697	1.7771e-09	2.71555e-08
BnaA01g05450D	4294.68	4.03631	0.120975	33.3394	1.03912e-243	1.75088e-239
BnaA01g06040D	160.825	-2.78803	0.277756	-9.99447	1.6114e-23	9.90932e-22
BnaA01g06140D	9.62146	2.37571	0.759959	2.85314	0.00432892	0.0180219
BnaA01g06150D	56.4097	4.77486	0.584912	6.50807	7.61202e-11	1.41463e-09
BnaA01g06170D	51.3979	3.13248	0.493347	6.13546	8.49122e-10	1.36826e-08
BnaA01g06180D	3068.14	2.39871	0.12539	19.1264	1.52301e-81	8.01946e-79
BnaA01g06380D	97.9515	-2.09469	0.331061	-6.31011	2.7883e-10	4.78593e-09
BnaA01g06390D	110.108	-2.0956	0.306703	-6.81518	9.41438e-12	1.97218e-10
BnaA01g06420D	344.364	-2.09258	0.205341	-10.1833	2.35484e-24	1.52609e-22
BnaA01g06480D	122.58	-2.27945	0.29755	-7.63855	2.19677e-14	6.29861e-13
BnaA01g06490D	973.087	2.39113	0.171189	13.9591	2.77053e-44	4.60682e-42
BnaA01g06550D	50.9425	-5.82821	0.664712	-6.24211	4.31717e-10	7.2357e-09
BnaA01g06750D	63.1418	-2.74149	0.411937	-6.58614	4.5142e-11	8.63042e-10
BnaA01g07720D	15.4586	3.77013	0.756038	4.39479	1.10878e-05	8.92051e-05
BnaA01g07750D	122.107	2.77822	0.320076	8.5994	8.01374e-18	3.21497e-16
BnaA01g07790D	110.334	6.18878	0.597923	5.8303	5.53283e-09	7.83854e-08
BnaA01g08350D	44.8591	3.27133	0.778474	4.01579	5.92471e-05	0.000410314
BnaA01g08550D	82.1671	2.75741	0.388874	6.99609	2.632e-12	5.91573e-11
BnaA01g09020D	39.4603	-2.39479	0.517098	-4.57921	4.66732e-06	4.03297e-05
BnaA01g10430D	14.0797	2.49155	0.696578	3.35158	0.000803519	0.00417742
BnaA01g10480D	47.5725	2.23448	0.454583	4.85421	1.2087e-06	1.16312e-05
BnaA01g10520D	217.675	7.35102	0.602573	7.52322	5.3444e-14	1.46584e-12
BnaA01g10880D	6.99295	2.52138	0.799214	3.19949	0.00137669	0.00669333
BnaA01g11120D	19.0735	-3.10158	0.656608	-4.42361	9.70668e-06	7.91903e-05
BnaA01g11230D	34.3043	-2.11685	0.503815	-4.16475	3.11694e-05	0.000228776
BnaA01g11690D	16.8054	2.00925	0.662937	2.95674	0.00310913	0.0135812
BnaA01g11840D	117.825	-2.72607	0.315747	-8.58598	9.00635e-18	3.60176e-16
BnaA01g11960D	38.5191	-2.1152	0.488242	-4.30039	1.70501e-05	0.000131764
BnaA01g12040D	711.258	2.36819	0.161208	14.6771	9.03244e-49	1.85602e-46
BnaA01g12320D	139.604	2.4201	0.295919	8.13517	4.11349e-16	1.404e-14
BnaA01g12370D	179.823	6.83363	0.576647	6.35151	2.13208e-10	3.70997e-09
BnaA01g12620D	22.9436	-3.84604	0.660404	-5.00312	5.64087e-07	5.74069e-06
BnaA01g12630D	6.50024	-2.77303	0.79683	-3.46734	0.000525628	0.00287711
BnaA01g13080D	244.464	2.5925	0.237568	10.8731	1.54823e-27	1.19558e-25
BnaA01g13090D	94.7012	3.08105	0.377517	8.02388	1.02452e-15	3.37566e-14
BnaA01g13160D	4.41589	-2.24981	0.800462	-2.93989	0.00328329	0.0142339
BnaA01g13280D	14.3741	-2.2223	0.671657	-3.23016	0.00123722	0.00609612
BnaA01g13370D	26.1881	4.20231	0.687862	4.19036	2.78506e-05	0.000206244
BnaA01g13440D	73.817	2.01948	0.388813	5.16306	2.42949e-07	2.63254e-06
BnaA01g13490D	16.6834	2.54586	0.668003	3.59809	0.000320562	0.0018649
BnaA01g13770D	36.5604	3.0306	0.537301	5.39299	6.92948e-08	8.22442e-07
BnaA01g13860D	13.7983	2.06901	0.681791	2.93096	0.00337918	0.0145895
BnaA01g13980D	18.0377	2.29112	0.654852	3.37617	0.000735028	0.00386039
BnaA01g14030D	50.7158	2.52372	0.454684	5.45758	4.82674e-08	5.87496e-07
BnaA01g14320D	25.7362	-2.07007	0.585204	-3.50616	0.000454614	0.0025331
BnaA01g14480D	13.2411	3.17681	0.746218	3.31937	0.000902224	0.00461932
BnaA01g14590D	133.911	2.72153	0.311278	8.67465	4.14812e-18	1.69681e-16
BnaA01g14690D	43.8011	2.35063	0.473058	4.89111	1.00271e-06	9.8039e-06
BnaA01g15010D	81.5568	3.00547	0.390258	7.56051	4.0149e-14	1.11818e-12
BnaA01g15330D	106.128	2.97318	0.347338	8.44504	3.03935e-17	1.15952e-15
BnaA01g15720D	47.01	-2.30833	0.443623	-5.16208	2.44223e-07	2.64522e-06
BnaA01g15990D	18.3418	4.04148	0.742009	4.64631	3.37925e-06	3.00384e-05
BnaA01g16050D	78.2535	2.08237	0.380915	5.43363	5.52177e-08	6.6568e-07
BnaA01g16180D	52.832	5.03101	0.659759	4.90366	9.40685e-07	9.24032e-06
BnaA01g16200D	8.34563	2.45129	0.783383	2.69183	0.00710608	0.0275289
BnaA01g16230D	11.2886	2.93751	0.759742	3.11205	0.00185791	0.0086975
BnaA01g16250D	22.0143	2.22713	0.598529	3.62125	0.00029318	0.00172526
BnaA01g16800D	5.78904	-2.20818	0.795849	-2.55048	0.0107576	0.0389699
BnaA01g16810D	8.16341	-2.77676	0.778118	-3.04073	0.00236003	0.010706
BnaA01g16840D	17.0086	2.23605	0.648378	3.32676	0.000878615	0.00451353
BnaA01g17200D	52.2876	3.21668	0.511065	6.06727	1.301e-09	2.03793e-08
BnaA01g17350D	132.799	2.11031	0.30005	7.00703	2.43438e-12	5.4911e-11
BnaA01g17480D	6.2073	2.44085	0.799848	3.10266	0.00191793	0.00894119
BnaA01g17830D	15.6936	3.13535	0.712435	3.76027	0.000169728	0.00106013
BnaA01g18050D	55.2873	4.54527	0.566551	6.74601	1.51963e-11	3.08373e-10
BnaA01g18180D	14.1497	-2.29161	0.683861	-3.26512	0.00109417	0.00546804
BnaA01g18270D	73.3573	5.87002	0.660998	6.28108	3.36237e-10	5.70925e-09
BnaA01g18320D	602.195	2.45118	0.172756	14.172	1.36531e-45	2.47365e-43
BnaA01g18330D	73.4871	2.92106	0.4245	6.75781	1.40093e-11	2.85776e-10
BnaA01g18530D	176.671	-2.05797	0.25104	-8.18553	2.71104e-16	9.39275e-15
BnaA01g18540D	14.4973	-3.1101	0.702729	-4.00335	6.24511e-05	0.000430263
BnaA01g18640D	13.2337	-2.25895	0.682318	-3.21724	0.00129429	0.00634148
BnaA01g18740D	160.75	6.67243	0.583092	6.22303	4.87658e-10	8.11677e-09
BnaA01g18750D	76.4639	2.60994	0.383899	6.71494	1.88141e-11	3.77545e-10
BnaA01g18960D	24.206	2.02628	0.581604	3.42049	0.000625081	0.0033532
BnaA01g19120D	154.472	-3.29704	0.308726	-10.5928	3.21727e-26	2.31997e-24
BnaA01g19460D	101.177	-3.18881	0.349092	-9.0321	1.6841e-19	7.68319e-18
BnaA01g19500D	348.61	-4.4898	0.245789	-18.0336	1.06224e-72	4.55044e-70
BnaA01g20460D	59.1164	-2.0679	0.408543	-5.03779	4.7093e-07	4.86612e-06
BnaA01g20560D	207.767	2.90514	0.265545	10.8733	1.54449e-27	1.19558e-25
BnaA01g20750D	88.0795	3.02704	0.378562	7.85787	3.90726e-15	1.21543e-13
BnaA01g20760D	50.4854	3.52647	0.505838	6.58604	4.51702e-11	8.63254e-10
BnaA01g20790D	417.628	-2.34848	0.196847	-11.9203	9.27802e-33	9.37989e-31
BnaA01g20830D	15.2959	-4.10633	0.746649	-4.718	2.3817e-06	2.17987e-05
BnaA01g20880D	296.071	3.33572	0.244652	13.5423	8.79441e-42	1.32701e-39
BnaA01g21010D	4.56171	2.07782	0.799978	2.71689	0.00658994	0.0258288
BnaA01g21430D	22.4418	4.29093	0.731258	4.8793	1.06462e-06	1.03631e-05
BnaA01g21540D	13.8326	2.41438	0.712051	3.19896	0.00137924	0.00670377
BnaA01g22100D	4.34609	2.02822	0.79944	2.66129	0.00778423	0.0297825
BnaA01g22150D	448.521	2.38628	0.186923	12.747	3.23877e-37	4.00285e-35
BnaA01g22550D	58.8665	-6.03007	0.655737	-6.41452	1.4127e-10	2.5296e-09
BnaA01g22690D	48.1175	-5.4515	0.637034	-5.34631	8.97655e-08	1.04456e-06
BnaA01g23040D	29.2127	-4.39884	0.65469	-5.27633	1.31794e-07	1.49307e-06
BnaA01g23490D	110.608	-6.59415	0.590822	-6.29907	2.99446e-10	5.12067e-09
BnaA01g23520D	46.8395	3.18013	0.508311	6.00838	1.87389e-09	2.84539e-08
BnaA01g23650D	15.027	-4.06984	0.748661	-4.6856	2.79135e-06	2.5183e-05
BnaA01g23680D	15.4403	2.24687	0.667519	3.23251	0.00122709	0.00604738
BnaA01g23690D	45.8805	-5.69071	0.67046	-6.12334	9.16358e-10	1.46678e-08
BnaA01g23790D	47.4212	-2.23449	0.466754	-4.75141	2.02001e-06	1.87116e-05
BnaA01g23890D	270.717	2.33388	0.225283	10.3351	4.89153e-25	3.27499e-23
BnaA01g23900D	161.825	-3.41108	0.291451	-11.5992	4.16001e-31	3.92321e-29
BnaA01g24020D	114.086	3.12615	0.343278	8.97202	2.91124e-19	1.29886e-17
BnaA01g24090D	304.007	-2.54039	0.21125	-12.0063	3.29112e-33	3.39516e-31
BnaA01g24360D	23.04	2.05037	0.594235	3.38235	0.000718693	0.00378272
BnaA01g24560D	31.4141	2.71352	0.800854	3.92177	8.79022e-05	0.000585965
BnaA01g25120D	5.91193	-2.62718	0.799211	-3.32552	0.000882523	0.00452946
BnaA01g25960D	55.92	3.5762	0.489385	6.92539	4.34784e-12	9.53487e-11
BnaA01g26060D	18.0496	-2.86813	0.652371	-4.18256	2.88243e-05	0.000212769
BnaA01g26300D	20.1627	-3.84985	0.68477	-4.62108	3.81748e-06	3.36067e-05
BnaA01g26340D	6.16636	-2.73036	0.797439	-3.41955	0.000627254	0.00336319
BnaA01g26640D	40.2374	-5.50034	0.679578	-5.95928	2.53345e-09	3.77434e-08
BnaA01g26920D	16.1048	2.11975	0.668492	3.07291	0.00211984	0.00974674
BnaA01g26930D	59.9275	2.50327	0.42387	5.82433	5.73407e-09	8.10093e-08
BnaA01g27350D	4.67985	2.14783	0.800677	2.78309	0.00538434	0.0217495
BnaA01g27890D	114.2	2.00581	0.307298	6.50198	7.92707e-11	1.47102e-09
BnaA01g28380D	19.7163	2.40804	0.650303	3.56518	0.000363608	0.00208721
BnaA01g28440D	30.5774	4.76857	0.706204	5.30898	1.10242e-07	1.26449e-06
BnaA01g28600D	11.9031	2.7082	0.740629	3.24169	0.00118822	0.00588394
BnaA01g28710D	977.663	-2.21404	0.141363	-15.6572	2.96498e-55	8.14549e-53
BnaA01g29370D	7.40154	-2.06603	0.76857	-2.5877	0.0096618	0.0355921
BnaA01g29440D	86.8399	2.13786	0.355408	5.97938	2.23991e-09	3.36579e-08
BnaA01g30490D	1267.43	-3.59217	0.143836	-24.9441	2.47349e-137	4.31146e-134
BnaA01g30960D	130.857	2.26586	0.297903	7.57042	3.72025e-14	1.03898e-12
BnaA01g31180D	85.3187	-2.04845	0.341423	-5.9815	2.21086e-09	3.32807e-08
BnaA01g31210D	45.2081	-2.32593	0.459063	-5.02434	5.05169e-07	5.19337e-06
BnaA01g31240D	16.2881	2.70987	0.681813	3.68616	0.000227665	0.00137675
BnaA01g31610D	67.6891	-2.1209	0.376215	-5.61347	1.98311e-08	2.57169e-07
BnaA01g32350D	40.9991	3.45657	0.542115	5.96653	2.42358e-09	3.61918e-08
BnaA01g32490D	23.5693	2.05639	0.602333	3.3498	0.000808699	0.00420047
BnaA01g32650D	31.9873	-2.49121	0.53276	-4.60199	4.18472e-06	3.65406e-05
BnaA01g34430D	50.4796	2.79337	0.469822	5.80728	6.34977e-09	8.9036e-08
BnaA01g34450D	8.72129	2.1888	0.772493	2.63396	0.00843953	0.0318616
BnaA02g00210D	331.834	-3.01491	0.20951	-14.3523	1.03001e-46	1.92837e-44
BnaA02g00280D	11.1994	-3.62488	0.768759	-4.27444	1.91621e-05	0.000146737
BnaA02g00370D	35.1936	3.20946	0.561815	5.38978	7.05448e-08	8.36493e-07
BnaA02g00410D	47.2242	-5.42428	0.638374	-5.32349	1.01794e-07	1.17452e-06
BnaA02g00920D	69.0063	-2.04802	0.392644	-5.19802	2.01422e-07	2.20957e-06
BnaA02g01000D	25.6684	3.39657	0.634687	4.79305	1.64263e-06	1.5405e-05
BnaA02g01310D	53.1244	-3.2729	0.46029	-6.93706	4.00337e-12	8.82539e-11
BnaA02g01340D	534.936	-2.67637	0.172434	-15.5047	3.2244e-54	8.40156e-52
BnaA02g01430D	198.3	2.70741	0.271556	9.9197	3.41793e-23	2.06666e-21
BnaA02g01460D	853.116	-2.39157	0.157381	-15.1892	4.16872e-52	9.75577e-50
BnaA02g01470D	129.91	-2.11775	0.288377	-7.32784	2.33885e-13	5.9892e-12
BnaA02g01690D	302.347	-2.23496	0.234054	-9.5386	1.44776e-21	7.76061e-20
BnaA02g01780D	407.163	-2.29167	0.206246	-11.1018	1.22991e-28	1.01255e-26
BnaA02g01810D	126.422	-2.04123	0.286282	-7.11563	1.11407e-12	2.62052e-11
BnaA02g02020D	1460.97	-8.21095	0.314288	-23.6201	2.3982e-123	3.10838e-120
BnaA02g02060D	18.1435	-2.06044	0.629078	-3.2248	0.00126061	0.00619929
BnaA02g02120D	27.573	2.70996	0.577872	4.50228	6.72294e-06	5.64327e-05
BnaA02g02200D	244.311	-2.2298	0.250463	-8.89073	6.07108e-19	2.66164e-17
BnaA02g02240D	41.3074	-2.30651	0.46318	-4.93349	8.07725e-07	8.02471e-06
BnaA02g02310D	93.4892	-5.3944	0.501468	-9.24908	2.26442e-20	1.09745e-18
BnaA02g02350D	114.182	-2.10949	0.304565	-6.90879	4.8879e-12	1.0639e-10
BnaA02g02400D	107.103	-2.01285	0.308168	-6.51682	7.18131e-11	1.34149e-09
BnaA02g02770D	87.6891	-2.45352	0.358831	-6.80132	1.03668e-11	2.15829e-10
BnaA02g02790D	7.77164	-2.42892	0.768942	-2.91161	0.00359569	0.0153928
BnaA02g03130D	34.1324	-2.09769	0.503877	-4.13072	3.61636e-05	0.000261671
BnaA02g03230D	11.4837	-2.00924	0.70135	-2.80554	0.00502326	0.0204758
BnaA02g03330D	33.2321	-2.19365	0.527438	-4.12237	3.74992e-05	0.000270715
BnaA02g03360D	392.228	-2.04698	0.188835	-10.8333	2.39374e-27	1.83613e-25
BnaA02g03550D	5.0042	-2.42793	0.800785	-3.1196	0.001811	0.00850393
BnaA02g03610D	91.7556	-2.21801	0.353056	-6.26127	3.81853e-10	6.44915e-09
BnaA02g03750D	31.7133	-2.51356	0.549714	-4.50514	6.63307e-06	5.57339e-05
BnaA02g03760D	78.3946	-2.52636	0.375103	-6.69306	2.18556e-11	4.34439e-10
BnaA02g03790D	56.6975	-2.1785	0.416608	-5.19968	1.99633e-07	2.19185e-06
BnaA02g03950D	11.2925	2.06782	0.737391	2.69365	0.00706744	0.0274029
BnaA02g03980D	44.4512	-3.1582	0.480947	-6.39544	1.60081e-10	2.83728e-09
BnaA02g04110D	8.34139	2.94846	0.787746	3.59703	0.000321876	0.00187125
BnaA02g04120D	11.4322	-3.63933	0.768526	-4.28986	1.78788e-05	0.000137726
BnaA02g04510D	4.99697	-2.42666	0.800789	-3.11817	0.00181979	0.00854038
BnaA02g04620D	33.005	4.86792	0.701699	5.39835	6.72582e-08	8.00526e-07
BnaA02g04650D	11.9199	-2.14389	0.713527	-2.93633	0.00332122	0.014375
BnaA02g04700D	7.55637	2.41089	0.781555	2.63624	0.00838304	0.0316873
BnaA02g05110D	326.47	3.09356	0.22289	13.8135	2.11283e-43	3.41218e-41
BnaA02g05210D	40.0102	4.06301	0.594452	5.90539	3.51815e-09	5.12962e-08
BnaA02g05230D	241.574	2.21905	0.236084	9.3776	6.74912e-21	3.44607e-19
BnaA02g05400D	21.837	3.3604	0.667696	4.4074	1.04618e-05	8.46811e-05
BnaA02g05480D	23.8609	4.43393	0.72218	5.00552	5.57113e-07	5.67887e-06
BnaA02g05510D	205.979	-3.04782	0.255274	-11.885	1.41688e-32	1.41545e-30
BnaA02g05730D	4.40145	-2.23965	0.800373	-2.93074	0.00338153	0.0145959
BnaA02g05760D	57.482	-2.21162	0.409704	-5.36628	8.03788e-08	9.43364e-07
BnaA02g05820D	20.1725	4.1826	0.734955	4.77635	1.78506e-06	1.66512e-05
BnaA02g05900D	130.75	2.00852	0.294625	6.79421	1.08906e-11	2.2571e-10
BnaA02g06330D	63.268	-6.12941	0.651459	-6.49903	8.08388e-11	1.49573e-09
BnaA02g06340D	39.8963	-5.46886	0.682065	-5.93342	2.96692e-09	4.37372e-08
BnaA02g06620D	12.4152	3.09329	0.75023	3.24704	0.0011661	0.00578422
BnaA02g07220D	22.8386	2.25022	0.606707	3.61298	0.000302702	0.00177406
BnaA02g07630D	39.2201	3.8148	0.588501	5.80865	6.29781e-09	8.84054e-08
BnaA02g07880D	12.5943	-3.438	0.742016	-3.64	0.000272641	0.00161454
BnaA02g07900D	63.2391	-6.1303	0.651335	-6.49968	8.04929e-11	1.49151e-09
BnaA02g08140D	17.3735	2.80694	0.674867	3.83844	0.000123821	0.000798345
BnaA02g08470D	224.02	2.12297	0.241411	8.77447	1.71704e-18	7.26923e-17
BnaA02g09020D	62.7994	2.27834	0.406686	5.54648	2.91482e-08	3.67985e-07
BnaA02g09200D	203.114	2.26405	0.259141	8.71127	3.00499e-18	1.2461e-16
BnaA02g09370D	610.474	-7.91367	0.416132	-15.3508	3.49797e-53	8.62532e-51
BnaA02g09810D	29.7723	3.25454	0.598037	5.04769	4.47172e-07	4.63389e-06
BnaA02g10370D	35.5309	-5.00408	0.657287	-4.97938	6.37885e-07	6.44116e-06
BnaA02g10650D	42.5877	-2.01671	0.467115	-4.29414	1.75369e-05	0.000135236
BnaA02g10940D	9.05637	2.95826	0.788788	3.62157	0.000292825	0.00172377
BnaA02g10970D	1989.87	2.29549	0.124452	18.4397	6.31081e-76	2.90004e-73
BnaA02g11200D	73.114	2.67471	0.442374	5.96768	2.40645e-09	3.59523e-08
BnaA02g11310D	6.15191	-2.70368	0.79802	-3.39743	0.000680209	0.00361213
BnaA02g11570D	9.75432	3.04432	0.786337	3.70856	0.000208441	0.00127314
BnaA02g12130D	268.062	-3.28582	0.245815	-13.3085	2.06609e-40	2.9586e-38
BnaA02g12270D	360.747	3.25122	0.220926	14.6421	1.51317e-48	3.08424e-46
BnaA02g12430D	1473.75	2.17515	0.142968	15.2094	3.06488e-52	7.27354e-50
BnaA02g12600D	79.3687	2.66991	0.379523	6.94549	3.77138e-12	8.33943e-11
BnaA02g12630D	9.65302	-2.27921	0.736072	-2.9671	0.00300626	0.0131867
BnaA02g12640D	18.4043	-3.28919	0.674829	-4.44023	8.98642e-06	7.37426e-05
BnaA02g12660D	35.1695	-2.84159	0.515174	-5.39331	6.91696e-08	8.21342e-07
BnaA02g13170D	26.1302	4.55333	0.716543	5.11466	3.14299e-07	3.34685e-06
BnaA02g13230D	79.0043	-2.24185	0.354616	-6.29394	3.09499e-10	5.27652e-09
BnaA02g13270D	5.01142	-2.42279	0.800807	-3.11585	0.00183417	0.00859592
BnaA02g13680D	18.8453	2.64649	0.677006	3.69567	0.000219307	0.0013329
BnaA02g14570D	24.2614	2.92335	0.622182	4.41579	1.00642e-05	8.18297e-05
BnaA02g14780D	975.296	-3.6214	0.162531	-22.2449	1.26246e-109	1.27632e-106
BnaA02g15030D	7.54296	2.39379	0.782589	2.62317	0.0087115	0.0326529
BnaA02g15090D	154.224	4.7387	0.390465	11.4023	4.07354e-30	3.63163e-28
BnaA02g15200D	39.0254	-2.96116	0.500402	-5.77803	7.55789e-09	1.05015e-07
BnaA02g15230D	124.84	2.02508	0.310365	6.50163	7.94527e-11	1.47385e-09
BnaA02g15500D	4.60556	2.10758	0.80033	2.74468	0.00605695	0.0240702
BnaA02g15580D	44.0503	-3.78695	0.524479	-6.81505	9.42315e-12	1.9732e-10
BnaA02g15770D	30.6875	3.14542	0.5842	5.05541	4.29457e-07	4.45945e-06
BnaA02g15920D	53.9146	4.49934	0.571112	6.64869	2.95707e-11	5.79593e-10
BnaA02g16460D	51.5414	-2.43792	0.426652	-5.66357	1.48258e-08	1.95827e-07
BnaA02g17180D	456.285	4.88165	0.268408	17.8025	6.75568e-71	2.75397e-68
BnaA02g17190D	6.52403	2.59469	0.797164	3.24438	0.00117709	0.00583452
BnaA02g17240D	5.79575	-2.28757	0.79467	-2.59471	0.00946702	0.0349918
BnaA02g17260D	930.052	-2.26175	0.161398	-14.0086	1.38062e-44	2.32631e-42
BnaA02g17320D	5.94421	2.46789	0.799197	3.11522	0.00183805	0.0086117
BnaA02g17520D	30.7868	4.67357	0.715433	5.23131	1.68315e-07	1.87116e-06
BnaA02g17680D	14.7737	-2.58014	0.674165	-3.67072	0.000241868	0.00145173
BnaA02g18110D	44.7338	-2.96351	0.477901	-6.07476	1.24174e-09	1.95237e-08
BnaA02g18220D	21.5076	4.28933	0.729192	4.87322	1.09796e-06	1.06548e-05
BnaA02g18290D	143.034	5.16193	0.45359	10.2405	1.30509e-24	8.54547e-23
BnaA02g18320D	25.2988	2.33046	0.576489	3.93454	8.33557e-05	0.0005589
BnaA02g18350D	8.2507	-3.16427	0.786202	-3.83938	0.000123345	0.00079599
BnaA02g18360D	10.241	-3.11797	0.75876	-3.35984	0.000779874	0.0040662
BnaA02g19550D	36.5343	-2.33473	0.49264	-4.68626	2.78241e-06	2.51292e-05
BnaA02g19730D	29.4146	2.34536	0.556956	4.11399	3.88872e-05	0.000279736
BnaA02g19770D	257.479	2.31693	0.231028	10.0041	1.46144e-23	9.02007e-22
BnaA02g19970D	18.8337	-2.43708	0.62031	-3.82879	0.000128773	0.000827112
BnaA02g20250D	5.28751	-2.5065	0.800349	-3.19825	0.00138266	0.00671653
BnaA02g20280D	25.5452	-2.51848	0.56212	-4.38808	1.14357e-05	9.16836e-05
BnaA02g20690D	28.5508	-5.01987	0.702082	-5.53862	3.04867e-08	3.83256e-07
BnaA02g20700D	13.4081	-2.14574	0.675828	-3.10046	0.00193222	0.00899539
BnaA02g20860D	425.243	-8.6175	0.568549	-8.55455	1.18329e-17	4.65481e-16
BnaA02g21020D	84.5783	-5.77344	0.556375	-7.87523	3.40111e-15	1.06652e-13
BnaA02g21180D	168.731	-4.19704	0.318415	-12.9133	3.78624e-38	4.9583e-36
BnaA02g21230D	150.285	-2.32378	0.295052	-7.85734	3.9237e-15	1.21905e-13
BnaA02g21340D	17.17	3.28921	0.701092	3.9465	7.9301e-05	0.000534621
BnaA02g21420D	5202.64	-2.12912	0.149205	-14.2691	3.40905e-46	6.26634e-44
BnaA02g21600D	92.8076	6.24501	0.641867	6.59721	4.18975e-11	8.05582e-10
BnaA02g21660D	18.1346	2.49251	0.649974	3.65429	0.000257891	0.00153837
BnaA02g21970D	7.34297	-2.99276	0.791364	-3.67421	0.000238582	0.00143521
BnaA02g22360D	19.0811	-2.03884	0.603859	-3.33007	0.00086825	0.00446527
BnaA02g22470D	869.64	2.40268	0.153104	15.6813	2.03028e-55	5.6701e-53
BnaA02g22500D	6.2073	2.44085	0.799848	3.10266	0.00191793	0.00894119
BnaA02g23670D	11.1953	2.64912	0.741507	3.17506	0.00149807	0.00720443
BnaA02g23820D	921.596	-9.60312	0.544971	-9.3446	9.22395e-21	4.63942e-19
BnaA02g24130D	720.016	-2.75454	0.163276	-16.8562	9.44871e-64	3.31682e-61
BnaA02g24590D	7.12151	2.31243	0.78576	2.54966	0.0107828	0.0390358
BnaA02g24610D	18.9739	3.4127	0.695862	4.09229	4.27127e-05	0.000304654
BnaA02g24730D	8.80669	3.02363	0.78525	3.67144	0.000241192	0.0014485
BnaA02g25080D	16.902	3.94207	0.746253	4.55232	5.30567e-06	4.54032e-05
BnaA02g25110D	14.3452	-2.23532	0.666467	-3.27151	0.00106976	0.00535981
BnaA02g25160D	56.8148	5.59713	0.668871	6.04074	1.53407e-09	2.37143e-08
BnaA02g25170D	55.9987	5.56033	0.671568	6.00986	1.85689e-09	2.82553e-08
BnaA02g25180D	196.501	7.22082	0.606704	7.4154	1.2126e-13	3.21424e-12
BnaA02g25210D	11.7264	3.4274	0.769717	4.0642	4.81975e-05	0.000339843
BnaA02g25550D	38.1904	5.0798	0.691129	5.58604	2.32308e-08	2.97617e-07
BnaA02g26490D	8.48698	2.57359	0.774526	2.78258	0.00539284	0.0217786
BnaA02g26500D	40.3415	5.15337	0.687729	5.65118	1.59352e-08	2.09441e-07
BnaA02g26730D	41.4042	3.92706	0.575554	6.06587	1.31242e-09	2.05392e-08
BnaA02g27060D	4.08201	-2.02815	0.796617	-2.73846	0.00617271	0.024461
BnaA02g27130D	8.42534	-2.08046	0.753469	-2.66399	0.00772191	0.0295775
BnaA02g27500D	25.5594	-3.76936	0.632525	-5.31067	1.09225e-07	1.25339e-06
BnaA02g27550D	87.0883	-2.42889	0.343254	-7.03967	1.92702e-12	4.40166e-11
BnaA02g27560D	198.335	-3.13331	0.27754	-11.2314	2.85824e-29	2.44883e-27
BnaA02g27660D	9.18141	-2.25796	0.763831	-2.84455	0.00444744	0.0184576
BnaA02g27670D	39.813	-2.24171	0.506714	-4.39025	1.13219e-05	9.08428e-05
BnaA02g27720D	363.29	4.0675	0.246567	16.2988	1.0068e-59	3.12224e-57
BnaA02g27850D	25.5656	2.86552	0.603909	4.49463	6.9692e-06	5.83545e-05
BnaA02g27890D	258.638	-3.35768	0.237152	-14.0856	4.65843e-45	8.14806e-43
BnaA02g27900D	21.9566	-4.27937	0.696305	-4.36631	1.26366e-05	0.000100309
BnaA02g28180D	61.743	-6.09743	0.652745	-6.47174	9.68826e-11	1.77826e-09
BnaA02g28860D	157.646	2.08208	0.290532	7.14527	8.98168e-13	2.13855e-11
BnaA02g29380D	103.991	-2.22039	0.32263	-6.8605	6.86219e-12	1.46671e-10
BnaA02g29390D	822.634	-2.62975	0.159551	-16.4718	5.84621e-61	1.90658e-58
BnaA02g29640D	12.2057	2.07002	0.703326	2.82844	0.00467761	0.019272
BnaA02g29980D	88.8242	2.51918	0.363842	6.85918	6.92589e-12	1.4797e-10
BnaA02g29990D	327.58	-2.62529	0.204419	-12.8212	1.24808e-37	1.59514e-35
BnaA02g30210D	271.175	3.55562	0.278872	12.6342	1.3685e-36	1.67093e-34
BnaA02g30580D	4.38994	2.02343	0.799305	2.65994	0.00781556	0.0298774
BnaA02g30600D	4.41589	-2.24981	0.800462	-2.93989	0.00328329	0.0142339
BnaA02g30810D	193.972	-7.34115	0.566941	-6.91384	4.71704e-12	1.03009e-10
BnaA02g31590D	173.367	2.50893	0.281699	8.86534	7.62737e-19	3.32089e-17
BnaA02g31630D	143.912	-2.14659	0.275744	-7.76844	7.94559e-15	2.39215e-13
BnaA02g32040D	25.2754	-4.84504	0.710595	-5.38379	7.29346e-08	8.62201e-07
BnaA02g32390D	13.2411	-2.73193	0.70447	-3.6503	0.00026193	0.0015586
BnaA02g32440D	90.6826	3.27211	0.391222	8.17999	2.8386e-16	9.8078e-15
BnaA02g32610D	13.5743	-3.89516	0.757344	-4.52743	5.97042e-06	5.05271e-05
BnaA02g32630D	28.7988	-2.05431	0.533715	-3.81234	0.000137656	0.000877475
BnaA02g32770D	239.711	2.47207	0.243406	10.124	4.32308e-24	2.76968e-22
BnaA02g32910D	49.3175	-3.7309	0.494278	-7.20021	6.01182e-13	1.46242e-11
BnaA02g33040D	228.081	-7.34189	0.531821	-8.72876	2.57489e-18	1.07569e-16
BnaA02g33360D	5.76882	2.43419	0.799621	3.07943	0.002074	0.00957344
BnaA02g33800D	8.39309	2.54153	0.776063	2.75815	0.00581294	0.023243
BnaA02g33820D	9.71785	-3.41671	0.777082	-4.07827	4.53715e-05	0.000322028
BnaA02g34030D	246.504	-4.4384	0.280864	-15.5254	2.33693e-54	6.18479e-52
BnaA02g34120D	310.079	2.2776	0.217479	10.4526	1.42573e-25	9.91323e-24
BnaA02g34250D	14.4603	-2.22366	0.699332	-3.10012	0.00193442	0.00900481
BnaA02g34260D	737.292	-4.25069	0.178754	-23.6743	6.62829e-124	9.0555e-121
BnaA02g34280D	1173.65	2.20313	0.14216	15.4909	3.9969e-54	1.03081e-51
BnaA02g34780D	349.048	2.00217	0.199719	10.0127	1.33997e-23	8.29062e-22
BnaA03g00350D	114.707	-2.4978	0.325473	-7.64374	2.11009e-14	6.08112e-13
BnaA03g01150D	24.1128	2.35444	0.59433	3.84836	0.00011891	0.000770614
BnaA03g01730D	8.1273	-2.80406	0.775872	-3.05981	0.00221478	0.0101344
BnaA03g02050D	81.7832	-5.34318	0.524852	-8.58417	9.14933e-18	3.65604e-16
BnaA03g02410D	105.37	2.15386	0.32915	6.51095	7.46774e-11	1.38935e-09
BnaA03g02500D	15.2915	2.46821	0.718559	3.25394	0.00113818	0.00566277
BnaA03g02560D	431.477	-4.99926	0.248363	-19.7856	3.96032e-87	2.44134e-84
BnaA03g02810D	3.82036	-2.05099	0.797608	-2.73541	0.00623021	0.0246482
BnaA03g02850D	166.72	3.07591	0.294716	10.3392	4.68219e-25	3.13899e-23
BnaA03g02900D	19.6106	-2.97109	0.650198	-4.33757	1.44067e-05	0.000112941
BnaA03g03270D	9.8052	-2.12795	0.733338	-2.80716	0.00499798	0.020394
BnaA03g03420D	10.1856	3.2165	0.778555	3.8615	0.000112694	0.00073381
BnaA03g03730D	54.3801	-3.97041	0.493882	-7.60136	2.93028e-14	8.29818e-13
BnaA03g03890D	43.003	3.81346	0.56066	6.17149	6.76507e-10	1.10455e-08
BnaA03g04040D	28.798	-5.03206	0.701515	-5.54938	2.86689e-08	3.62114e-07
BnaA03g04090D	11.2824	2.96789	0.755924	3.13546	0.00171587	0.0081137
BnaA03g04410D	58.0988	-2.78711	0.420945	-6.53855	6.21172e-11	1.16814e-09
BnaA03g04460D	20.6131	-2.00095	0.594098	-3.32672	0.000878753	0.00451378
BnaA03g05010D	17.9642	4.00663	0.743856	4.61439	3.94252e-06	3.46352e-05
BnaA03g05320D	86.5561	2.29019	0.37185	6.1151	9.64954e-10	1.54067e-08
BnaA03g05520D	11.7562	2.45234	0.724457	3.13301	0.00173023	0.00816634
BnaA03g05550D	47.5226	-4.2664	0.538791	-7.2052	5.79597e-13	1.41195e-11
BnaA03g05940D	333.985	2.43416	0.210533	11.5369	8.59273e-31	7.91173e-29
BnaA03g05980D	123.249	2.03888	0.318934	6.36965	1.89461e-10	3.32192e-09
BnaA03g05990D	218.946	3.26588	0.265099	12.2113	2.70446e-34	2.98489e-32
BnaA03g06350D	9.19834	2.69151	0.769055	2.88723	0.00388655	0.0164279
BnaA03g06360D	70.8982	5.90089	0.655272	6.30253	2.92835e-10	5.01101e-09
BnaA03g06650D	47.631	-5.74213	0.668177	-6.16765	6.93119e-10	1.12912e-08
BnaA03g06830D	20.7516	2.0037	0.602203	3.25839	0.00112045	0.00558444
BnaA03g06850D	35.4081	2.05871	0.505458	4.01945	5.8335e-05	0.000404663
BnaA03g06940D	30.9755	2.40043	0.792408	3.09934	0.00193952	0.00902523
BnaA03g07280D	15.9556	2.29753	0.665028	3.31244	0.000924858	0.00472038
BnaA03g07460D	4.41589	-2.24981	0.800462	-2.93989	0.00328329	0.0142339
BnaA03g07490D	1306.2	-4.98771	0.164202	-30.2223	1.20756e-200	7.6301e-197
BnaA03g07520D	19.4009	3.77326	0.71112	3.82656	0.000129948	0.000833387
BnaA03g07640D	19.7798	3.20255	0.680081	4.16994	3.04679e-05	0.00022392
BnaA03g07650D	12.0566	-3.74801	0.763189	-4.38775	1.1453e-05	9.18074e-05
BnaA03g07720D	77.2361	3.14209	0.403753	7.60578	2.83198e-14	8.02432e-13
BnaA03g07800D	49.8353	-2.0625	0.426289	-4.81208	1.4937e-06	1.41263e-05
BnaA03g08030D	10.1171	-2.80713	0.754261	-3.32591	0.000881291	0.00452451
BnaA03g08040D	119.905	5.64849	0.520235	8.62837	6.22309e-18	2.51255e-16
BnaA03g08200D	87.893	-2.28705	0.356028	-6.39649	1.5899e-10	2.8229e-09
BnaA03g08390D	1023.79	-2.01477	0.138341	-14.5605	5.00684e-48	1.00036e-45
BnaA03g08530D	14.3882	-4.00757	0.751533	-4.62818	3.68898e-06	3.25662e-05
BnaA03g08760D	65.2943	-5.41009	0.571036	-7.34338	2.08264e-13	5.37119e-12
BnaA03g08890D	6.04532	2.49999	0.798708	3.1465	0.00165238	0.0078502
BnaA03g08910D	125.257	-2.94973	0.310132	-9.44668	3.49732e-21	1.8263e-19
BnaA03g09250D	49.5428	-2.67243	0.444413	-5.93688	2.90491e-09	4.28856e-08
BnaA03g09430D	24.5576	-2.63148	0.576751	-4.44931	8.61473e-06	7.08766e-05
BnaA03g09530D	33.6942	-2.3648	0.534184	-4.37122	1.23551e-05	9.826e-05
BnaA03g09750D	70.3839	-2.57248	0.389353	-6.55806	5.45105e-11	1.032e-09
BnaA03g09760D	13.5396	-2.07339	0.684118	-2.9759	0.00292127	0.0128697
BnaA03g09950D	129.193	2.26232	0.300831	7.48495	7.15717e-14	1.94092e-12
BnaA03g10160D	39.0273	-2.05806	0.46653	-4.38135	1.17949e-05	9.42938e-05
BnaA03g10650D	235.669	-2.35244	0.246212	-9.53974	1.43195e-21	7.68406e-20
BnaA03g10680D	26.1373	2.74513	0.594191	4.41648	1.00322e-05	8.16093e-05
BnaA03g10890D	13.1685	2.82055	0.735847	3.37951	0.000726144	0.00381836
BnaA03g11100D	1035.7	3.05011	0.185511	16.4217	1.33854e-60	4.2824e-58
BnaA03g11400D	57.0954	2.42033	0.431128	5.54079	3.01104e-08	3.78997e-07
BnaA03g11480D	55.8383	-5.95837	0.658809	-6.35327	2.10791e-10	3.67171e-09
BnaA03g11680D	11.9018	3.45301	0.76844	4.08845	4.34266e-05	0.00030944
BnaA03g11880D	16.656	3.90399	0.748591	4.51827	6.23469e-06	5.26313e-05
BnaA03g12000D	39.1331	-5.46832	0.680674	-5.931	3.01091e-09	4.42955e-08
BnaA03g12120D	6.94387	-2.16903	0.781772	-2.6339	0.00844113	0.0318616
BnaA03g12400D	26.7859	-4.92792	0.706566	-5.45737	4.83233e-08	5.88035e-07
BnaA03g12450D	49.8929	-2.84458	0.457423	-6.12485	9.07713e-10	1.45525e-08
BnaA03g12660D	10.6106	3.23939	0.778148	3.88828	0.000100958	0.000664407
BnaA03g12970D	40.7955	2.75898	0.518153	5.17831	2.23905e-07	2.44137e-06
BnaA03g13140D	2745.4	-2.00406	0.129387	-15.4877	4.19999e-54	1.07769e-51
BnaA03g13250D	9.38096	2.70956	0.768001	2.90641	0.00365605	0.0156102
BnaA03g13460D	188.276	-2.33414	0.248398	-9.37747	6.75727e-21	3.44675e-19
BnaA03g13480D	35.9964	-3.07395	0.52733	-5.65655	1.5445e-08	2.03367e-07
BnaA03g13570D	24.6016	2.03527	0.585419	3.4148	0.000638284	0.00341352
BnaA03g13620D	78.0412	3.88354	0.449221	8.20345	2.33578e-16	8.12603e-15
BnaA03g13630D	20.519	-3.21978	0.647771	-4.63029	3.65161e-06	3.22758e-05
BnaA03g13730D	9.84183	-2.12641	0.728589	-2.8267	0.0047031	0.0193644
BnaA03g14070D	1366.97	-3.69077	0.14127	-26.0935	4.32125e-150	9.10145e-147
BnaA03g14280D	5.5925	-2.58957	0.799534	-3.28042	0.00103652	0.00521446
BnaA03g14730D	46.7447	2.3948	0.460346	5.12109	3.03776e-07	3.2471e-06
BnaA03g15020D	13.5526	-2.11793	0.708734	-2.92069	0.00349261	0.0150177
BnaA03g15970D	10.6039	-3.54735	0.77189	-4.20128	2.65404e-05	0.000197148
BnaA03g16980D	3.82036	-2.05099	0.797608	-2.73541	0.00623021	0.0246482
BnaA03g17000D	863.55	4.58437	0.19545	23.2693	9.07752e-120	1.04286e-116
BnaA03g17030D	73.7329	-2.75909	0.405737	-6.74123	1.57055e-11	3.18196e-10
BnaA03g17060D	14.0981	-2.36307	0.673174	-3.40108	0.00067119	0.00357099
BnaA03g17400D	68.8051	2.39103	0.391136	6.04872	1.45998e-09	2.2659e-08
BnaA03g17410D	10.5967	-3.55032	0.771694	-4.20358	2.62727e-05	0.00019536
BnaA03g17760D	99.1453	-2.28615	0.335142	-6.79599	1.07568e-11	2.23212e-10
BnaA03g17770D	20.5979	-4.54725	0.725207	-5.11775	3.09206e-07	3.29791e-06
BnaA03g17920D	32.9603	2.74174	0.5472	4.83916	1.30391e-06	1.24797e-05
BnaA03g18230D	6.1808	-2.73726	0.79729	-3.42573	0.000613159	0.00329762
BnaA03g18300D	605.027	5.40156	0.254813	20.6299	1.47812e-94	1.08286e-91
BnaA03g18420D	18.0777	-3.25372	0.67859	-4.37813	1.19702e-05	9.55227e-05
BnaA03g18530D	23.035	4.37501	0.725348	4.95254	7.32518e-07	7.33084e-06
BnaA03g18570D	46.9374	-2.10481	0.445312	-4.6981	2.62594e-06	2.38438e-05
BnaA03g18750D	262.765	3.57249	0.25987	13.6094	3.52262e-42	5.46211e-40
BnaA03g18830D	393.747	2.01699	0.189827	10.6138	2.57111e-26	1.86199e-24
BnaA03g18900D	68.0807	-2.28337	0.378181	-6.00538	1.90883e-09	2.89221e-08
BnaA03g18930D	13.9993	3.52238	0.769212	4.17303	3.00574e-05	0.00022116
BnaA03g19030D	90.8944	-2.73584	0.345407	-7.86317	3.74528e-15	1.16648e-13
BnaA03g19070D	35.5689	-2.39722	0.497799	-4.75611	1.97361e-06	1.83019e-05
BnaA03g19270D	62.8185	-6.10373	0.653533	-6.47835	9.27284e-11	1.70572e-09
BnaA03g19400D	9.14399	-3.30836	0.781389	-3.978	6.94966e-05	0.000474023
BnaA03g19560D	10.8662	-2.16935	0.73028	-2.89161	0.00383275	0.0162331
BnaA03g20310D	474.664	-2.17087	0.207674	-10.4475	1.50445e-25	1.04176e-23
BnaA03g20320D	64.0644	3.0333	0.432376	6.84527	7.63306e-12	1.62051e-10
BnaA03g20610D	74.9716	2.57738	0.385299	6.60857	3.88038e-11	7.48947e-10
BnaA03g20620D	227.414	3.31371	0.276006	11.9022	1.15236e-32	1.15806e-30
BnaA03g20930D	63.444	2.38555	0.419523	5.62312	1.87541e-08	2.44015e-07
BnaA03g21570D	33.1768	4.88843	0.700148	5.41576	6.10306e-08	7.30878e-07
BnaA03g21750D	9.96505	-3.43036	0.776994	-4.09425	4.23541e-05	0.00030231
BnaA03g21780D	60.4456	-2.74782	0.409622	-6.63247	3.30113e-11	6.43536e-10
BnaA03g21830D	5.1013	2.26159	0.800854	2.90225	0.00370495	0.0157897
BnaA03g21880D	202.429	2.34909	0.25074	9.3377	9.84508e-21	4.9322e-19
BnaA03g21990D	191.658	-2.8991	0.259896	-11.109	1.13395e-28	9.35073e-27
BnaA03g22180D	126.554	2.20832	0.301364	7.29475	2.99223e-13	7.54384e-12
BnaA03g22980D	22.3052	-3.59037	0.643593	-5.00592	5.55954e-07	5.66934e-06
BnaA03g23020D	12.7794	3.15621	0.745559	3.29867	0.000971447	0.00492485
BnaA03g23050D	820.684	2.68817	0.173711	15.4584	6.6267e-54	1.67486e-51
BnaA03g23200D	16.0189	3.76537	0.757456	4.39646	1.10029e-05	8.8621e-05
BnaA03g24080D	42.7819	-2.115	0.45796	-4.58741	4.48776e-06	3.89312e-05
BnaA03g24210D	239.576	3.0559	0.257386	11.7991	3.94586e-32	3.88053e-30
BnaA03g24550D	14.0316	2.71151	0.708377	3.48862	0.000485519	0.00268306
BnaA03g24580D	119.949	2.11313	0.308494	6.82108	9.03589e-12	1.89741e-10
BnaA03g24750D	60.0798	2.67318	0.430021	6.11162	9.86262e-10	1.5722e-08
BnaA03g24890D	6.19027	2.53104	0.798233	3.17837	0.00148105	0.00713619
BnaA03g24930D	4.72088	-2.33035	0.80084	-3.02433	0.00249185	0.0112184
BnaA03g24950D	204.766	-7.67913	0.595211	-7.79145	6.62438e-15	2.01114e-13
BnaA03g24960D	8.84623	-3.2626	0.782957	-3.93401	8.35417e-05	0.000560073
BnaA03g25180D	120.051	6.54286	0.633036	6.85193	7.28596e-12	1.55269e-10
BnaA03g25580D	67.2489	-2.25893	0.427814	-5.25619	1.4707e-07	1.65169e-06
BnaA03g26740D	6.7341	2.21954	0.789492	2.46968	0.0135235	0.0470895
BnaA03g27660D	60.896	-2.41582	0.404035	-5.93533	2.93253e-09	4.32555e-08
BnaA03g28360D	435.551	-3.88589	0.206659	-18.7037	4.61821e-78	2.28868e-75
BnaA03g28370D	142.907	-6.94171	0.577651	-6.58889	4.43112e-11	8.48121e-10
BnaA03g28480D	12.0389	2.4916	0.722384	3.18381	0.00145349	0.00701878
BnaA03g29500D	24.3912	2.05185	0.570569	3.52786	0.000418937	0.0023597
BnaA03g29740D	13.6599	2.21656	0.695716	3.05041	0.00228531	0.0104119
BnaA03g30160D	9.15883	-2.63669	0.764785	-3.12796	0.00176024	0.00829171
BnaA03g30240D	68.3408	-2.67355	0.400549	-6.61444	3.72964e-11	7.22503e-10
BnaA03g30580D	67.2435	2.18922	0.422178	5.1444	2.68374e-07	2.88762e-06
BnaA03g30740D	592.395	8.61664	0.567243	8.55736	1.15479e-17	4.55688e-16
BnaA03g30810D	43.9357	2.42692	0.47153	5.05798	4.2372e-07	4.41076e-06
BnaA03g31090D	154.124	3.41195	0.313922	10.7073	9.40788e-27	6.99352e-25
BnaA03g31100D	38.6748	2.69856	0.511301	5.13298	2.85191e-07	3.0601e-06
BnaA03g31290D	1133.66	-5.61634	0.190022	-29.2282	8.50514e-188	4.77696e-184
BnaA03g31390D	17.3586	-4.29477	0.73757	-4.88972	1.00977e-06	9.86527e-06
BnaA03g31590D	7.07703	2.71787	0.794336	3.36716	0.000759464	0.00397208
BnaA03g31680D	5.43506	2.3551	0.800383	2.99771	0.0027202	0.0120946
BnaA03g32320D	931.473	-2.78032	0.362747	-7.66028	1.85528e-14	5.396e-13
BnaA03g32410D	140.488	4.76353	0.411375	10.7876	3.9385e-27	2.97589e-25
BnaA03g33530D	53.2822	-3.18464	0.462272	-6.73635	1.62419e-11	3.28143e-10
BnaA03g33910D	14.8973	-2.03109	0.67135	-2.97304	0.00294868	0.0129758
BnaA03g33920D	6.78355	-2.86171	0.794792	-3.54939	0.000386122	0.00219823
BnaA03g34110D	66.3916	2.45361	0.42096	5.76198	8.31328e-09	1.14535e-07
BnaA03g34290D	51.5219	2.08762	0.441251	4.68641	2.78045e-06	2.51159e-05
BnaA03g34300D	7.24886	-2.22459	0.779748	-2.69884	0.00695807	0.027064
BnaA03g34920D	12.6162	-2.6978	0.706584	-3.58815	0.000333033	0.00193071
BnaA03g35310D	29.903	-2.45158	0.530163	-4.5503	5.35686e-06	4.57792e-05
BnaA03g35400D	76.3782	-5.83422	0.581728	-6.9905	2.73906e-12	6.14272e-11
BnaA03g35640D	4.50445	2.10274	0.800356	2.73464	0.00624493	0.0246888
BnaA03g35760D	34.2609	-3.0643	0.52981	-5.60686	2.06034e-08	2.66705e-07
BnaA03g35870D	57.7337	5.29487	0.635225	5.10226	3.35626e-07	3.55814e-06
BnaA03g36300D	6.97958	-2.55105	0.786693	-2.83634	0.00456334	0.0188751
BnaA03g36380D	10.7496	-2.26366	0.718483	-3.03677	0.00239126	0.0108273
BnaA03g36440D	165.075	-3.07323	0.283424	-10.7804	4.25863e-27	3.20819e-25
BnaA03g36480D	37.887	5.06273	0.692192	5.57133	2.528e-08	3.21965e-07
BnaA03g36660D	12.3537	3.48749	0.767327	4.12353	3.73105e-05	0.00026943
BnaA03g36690D	38.086	2.12181	0.485444	4.31179	1.61938e-05	0.000125742
BnaA03g36810D	58.0114	2.80479	0.446112	6.15909	7.31628e-10	1.18917e-08
BnaA03g36890D	81.105	-2.24512	0.3505	-6.37828	1.79089e-10	3.15098e-09
BnaA03g36950D	233.343	2.79213	0.24498	11.3424	8.08716e-30	7.12192e-28
BnaA03g36960D	4.22795	2.00699	0.799109	2.63592	0.00839107	0.0317105
BnaA03g37060D	15.2162	3.79343	0.753273	4.41291	1.0199e-05	8.28062e-05
BnaA03g37070D	7.85843	-2.73718	0.779229	-3.00246	0.00267811	0.0119399
BnaA03g37290D	100.032	-2.67155	0.332824	-7.97856	1.48053e-15	4.81593e-14
BnaA03g37330D	53.2235	-5.89513	0.661405	-6.29899	2.996e-10	5.12157e-09
BnaA03g37790D	11.5706	-2.34638	0.717772	-3.14616	0.00165429	0.00785631
BnaA03g38050D	6846.15	-2.81327	0.116333	-24.181	3.5288e-129	5.57429e-126
BnaA03g38290D	7.17876	2.33827	0.784428	2.57065	0.0101508	0.0371417
BnaA03g38600D	17.4611	2.10961	0.644451	3.18062	0.0014696	0.00708575
BnaA03g38630D	511.003	-2.49367	0.422941	-5.8927	3.79947e-09	5.49841e-08
BnaA03g38670D	351.688	-3.53623	0.215364	-16.3455	4.68175e-60	1.48841e-57
BnaA03g39040D	54.3928	-5.92463	0.660138	-6.32426	2.5445e-10	4.38682e-09
BnaA03g39190D	9.10446	2.67098	0.7697	2.87149	0.00408544	0.0171516
BnaA03g39280D	294.968	5.59307	0.363822	14.3025	2.11161e-46	3.90989e-44
BnaA03g39700D	6.44245	-2.76559	0.796953	-3.45908	0.000542029	0.00295758
BnaA03g39710D	35.1825	-4.70437	0.635164	-5.6482	1.62138e-08	2.1265e-07
BnaA03g39720D	99.1328	-6.73223	0.627464	-7.00737	2.42837e-12	5.47998e-11
BnaA03g40240D	26.8415	4.59504	0.714343	5.15212	2.57564e-07	2.78018e-06
BnaA03g40750D	5.85415	-2.61842	0.799313	-3.31587	0.000913587	0.00466804
BnaA03g40950D	13.5969	-2.03942	0.671318	-2.97825	0.002899	0.0127816
BnaA03g41530D	300.956	2.66368	0.225559	11.7722	5.42813e-32	5.28683e-30
BnaA03g41920D	157.821	-2.7004	0.288539	-9.3237	1.12357e-20	5.60112e-19
BnaA03g42010D	53.4497	-3.37283	0.48061	-6.82534	8.77173e-12	1.84367e-10
BnaA03g42100D	7.67387	2.81563	0.79189	3.46734	0.00052563	0.00287711
BnaA03g42190D	117.349	-6.955	0.619295	-7.19328	6.32526e-13	1.53571e-11
BnaA03g42300D	18.7102	-3.1138	0.65342	-4.44731	8.69508e-06	7.14795e-05
BnaA03g42440D	24.2528	2.13871	0.580222	3.60752	0.000309137	0.0018078
BnaA03g43750D	101.764	6.07774	0.602198	5.74047	9.44136e-09	1.28709e-07
BnaA03g43840D	564.53	8.31144	0.538678	7.53211	4.99278e-14	1.37612e-12
BnaA03g44510D	48.0186	-2.80648	0.455111	-6.07248	1.25952e-09	1.97725e-08
BnaA03g44690D	10.0619	2.80274	0.764205	2.9902	0.00278796	0.0123523
BnaA03g44770D	4.66644	2.0703	0.799839	2.71642	0.00659925	0.0258594
BnaA03g44860D	25.1222	3.16766	0.62639	4.65505	3.23903e-06	2.89122e-05
BnaA03g45000D	21.375	-4.26929	0.698212	-4.34195	1.41223e-05	0.000110866
BnaA03g45070D	62.6737	2.22777	0.410801	5.37254	7.76367e-08	9.13301e-07
BnaA03g45080D	1142.94	-4.37579	0.166622	-26.1816	4.31143e-151	9.90629e-148
BnaA03g45240D	13.7156	3.61641	0.762466	4.24798	2.15711e-05	0.000163184
BnaA03g45370D	99.2806	-3.63458	0.365833	-9.7429	1.97836e-22	1.13512e-20
BnaA03g45380D	18.8263	-2.97114	0.648187	-4.33379	1.46565e-05	0.00011465
BnaA03g45390D	119.237	-2.94557	0.638561	-4.59775	4.27087e-06	3.72029e-05
BnaA03g45670D	13.4135	2.90376	0.727367	3.47631	0.000508363	0.002795
BnaA03g45820D	21.6877	2.20383	0.598756	3.58356	0.000338938	0.00196074
BnaA03g45890D	34.2876	4.30476	0.641722	5.17702	2.25459e-07	2.45672e-06
BnaA03g46000D	5.82608	2.42084	0.799891	3.0703	0.00213842	0.00982236
BnaA03g46250D	583.693	-9.02126	0.558437	-8.8795	6.71603e-19	2.93675e-17
BnaA03g46260D	27.8758	-4.96825	0.705395	-5.49436	3.92125e-08	4.83924e-07
BnaA03g46290D	40.3373	2.86035	0.515114	5.37555	7.63504e-08	8.98379e-07
BnaA03g46580D	38.2325	-5.43652	0.682115	-5.90331	3.5628e-09	5.18412e-08
BnaA03g46590D	7.67387	2.81563	0.79189	3.46734	0.00052563	0.00287711
BnaA03g46670D	19.7645	4.16698	0.735268	4.76086	1.92767e-06	1.79121e-05
BnaA03g46680D	32.435	4.85766	0.701638	5.38822	7.11593e-08	8.42884e-07
BnaA03g46690D	28.3215	4.66903	0.710872	5.21889	1.79994e-07	1.9918e-06
BnaA03g46790D	22.6028	-4.67159	0.71957	-5.23014	1.69383e-07	1.88179e-06
BnaA03g46910D	253.774	-2.6429	0.235864	-11.1803	5.09394e-29	4.28442e-27
BnaA03g46960D	49.8168	-5.2405	0.61028	-6.24825	4.15089e-10	6.97087e-09
BnaA03g47140D	254.347	-4.25702	0.281252	-14.9281	2.16367e-50	4.77603e-48
BnaA03g47170D	6.6726	2.52401	0.798872	3.18999	0.00142277	0.00688621
BnaA03g47530D	17.2017	2.74564	0.68655	3.71393	0.000204063	0.00124941
BnaA03g47640D	4.72369	2.15075	0.800681	2.78799	0.00530355	0.0214678
BnaA03g47730D	5.28751	-2.5065	0.800349	-3.19825	0.00138266	0.00671653
BnaA03g48210D	14.7918	3.36961	0.734482	3.48188	0.000497899	0.00274403
BnaA03g48280D	56.1625	-2.20635	0.41057	-5.3431	9.13679e-08	1.06221e-06
BnaA03g48340D	12.8419	-2.05504	0.682287	-2.9504	0.00317361	0.0138308
BnaA03g48410D	54.0946	2.38616	0.44156	5.33278	9.67218e-08	1.12009e-06
BnaA03g48490D	5.08789	2.19099	0.800792	2.84159	0.00448899	0.0186148
BnaA03g48780D	15.463	-3.77801	0.725908	-3.91793	8.93129e-05	0.000594741
BnaA03g48850D	48.0827	2.50893	0.457834	5.38416	7.27841e-08	8.60825e-07
BnaA03g48860D	12.0855	-3.73803	0.763926	-4.38003	1.18661e-05	9.47735e-05
BnaA03g48890D	32.0978	-2.14763	0.506308	-4.20187	2.64724e-05	0.0001967
BnaA03g49430D	382.508	-8.48142	0.572187	-8.44468	3.04872e-17	1.16222e-15
BnaA03g50070D	109.517	3.42691	0.398893	8.41449	3.94617e-17	1.48751e-15
BnaA03g50180D	88.7726	-2.97958	0.356867	-8.26539	1.39242e-16	4.95322e-15
BnaA03g50580D	4.38994	2.02343	0.799305	2.65994	0.00781556	0.0298774
BnaA03g51110D	5.86992	2.44245	0.7996	3.09049	0.00199827	0.00926616
BnaA03g51210D	9.62334	-3.04707	0.765065	-3.27812	0.00104499	0.00524875
BnaA03g51520D	18.2528	3.35977	0.698366	4.03176	5.53605e-05	0.00038551
BnaA03g51820D	26.4927	2.13958	0.594959	3.52838	0.000418105	0.0023559
BnaA03g52240D	12.6018	-2.69695	0.706561	-3.5871	0.000334374	0.00193702
BnaA03g52310D	4.69199	-2.32491	0.800827	-3.01819	0.00254286	0.0114237
BnaA03g52350D	490.829	8.37154	0.574055	8.35958	6.29403e-17	2.31387e-15
BnaA03g52770D	325.036	-4.70283	0.27201	-16.9981	8.48574e-65	3.04217e-62
BnaA03g53010D	1068.44	-2.10713	0.150189	-14.0266	1.07095e-44	1.81663e-42
BnaA03g53980D	135.107	-2.39675	0.287725	-8.30387	1.0077e-16	3.63584e-15
BnaA03g54060D	131.83	2.58947	0.309898	8.299	1.04995e-16	3.7829e-15
BnaA03g54140D	55.3223	-5.94676	0.659231	-6.34326	2.2495e-10	3.89818e-09
BnaA03g54320D	700.77	3.71853	0.18229	20.3153	9.42676e-92	6.43937e-89
BnaA03g54400D	134.52	-5.25874	0.416886	-11.6089	3.71356e-31	3.52189e-29
BnaA03g54610D	436.839	2.95364	0.212318	13.8716	9.42153e-44	1.54626e-41
BnaA04g00260D	39.1363	-2.49232	0.494318	-4.98162	6.30556e-07	6.37734e-06
BnaA04g00590D	7.23401	-2.62394	0.783502	-2.8989	0.00374475	0.0159311
BnaA04g01160D	8.16392	-2.76882	0.775338	-3.05049	0.00228467	0.0104109
BnaA04g01170D	40.1028	-2.13103	0.46825	-4.51838	6.23157e-06	5.26139e-05
BnaA04g01520D	13.6263	-3.15053	0.733887	-3.78107	0.000156154	0.00098471
BnaA04g01590D	44.6695	3.00519	0.508221	5.71307	1.10955e-08	1.49604e-07
BnaA04g02460D	455.728	2.52148	0.187222	13.4445	3.31427e-41	4.89862e-39
BnaA04g02560D	15.8781	-2.72325	0.692493	-3.76066	0.000169468	0.00105876
BnaA04g03210D	105.116	3.45429	0.371369	9.08536	1.03357e-19	4.77133e-18
BnaA04g04140D	119.743	3.10331	0.354128	8.64686	5.29357e-18	2.14927e-16
BnaA04g04850D	159.542	2.84749	0.29569	9.55764	1.20468e-21	6.51288e-20
BnaA04g05010D	12.9676	3.3852	0.775273	4.04616	5.20639e-05	0.000364512
BnaA04g05200D	38.8097	3.50979	0.557667	5.83448	5.39599e-09	7.65755e-08
BnaA04g05210D	6.74022	-2.84326	0.795286	-3.53292	0.000411	0.00232078
BnaA04g05500D	686.133	2.44333	0.162647	15.0069	6.61361e-51	1.48583e-48
BnaA04g05620D	9.12704	3.06422	0.783964	3.71266	0.000205094	0.00125473
BnaA04g05930D	10.2952	2.53511	0.747211	3.04049	0.00236196	0.0107138
BnaA04g05980D	9.65262	-2.47722	0.753791	-3.08154	0.00205936	0.00951801
BnaA04g06060D	5.31641	-2.48731	0.800527	-3.18429	0.00145111	0.00700927
BnaA04g06110D	15.6377	3.83213	0.75146	4.44931	8.61458e-06	7.08766e-05
BnaA04g06630D	2941.34	-2.55863	0.13274	-19.2727	9.10395e-83	4.94834e-80
BnaA04g06850D	15.1687	3.76397	0.755661	4.38708	1.1488e-05	9.20591e-05
BnaA04g06980D	62.3506	-2.19295	0.389167	-5.60601	2.07043e-08	2.67805e-07
BnaA04g08510D	9.8799	2.4293	0.757926	2.90882	0.00362792	0.0155098
BnaA04g08920D	166.748	2.89595	0.289555	9.92521	3.23418e-23	1.96025e-21
BnaA04g09030D	73.3428	5.9494	0.652951	6.34394	2.23959e-10	3.88366e-09
BnaA04g11970D	280.169	3.71607	0.287665	12.785	1.98869e-37	2.48827e-35
BnaA04g12140D	34.7253	-3.00665	0.525794	-5.55725	2.74053e-08	3.46934e-07
BnaA04g12560D	28.3201	-2.75717	0.554243	-4.84958	1.23724e-06	1.1881e-05
BnaA04g12630D	90.6855	4.01479	0.435278	8.76315	1.89871e-18	7.99815e-17
BnaA04g12670D	281.376	4.20088	0.278644	14.8028	1.40586e-49	2.98592e-47
BnaA04g12920D	36.8167	2.55937	0.558777	4.47435	7.66438e-06	6.36273e-05
BnaA04g12930D	8.57467	2.57991	0.77451	2.78954	0.00527827	0.0213892
BnaA04g13710D	105.517	2.09269	0.351652	5.92434	3.1355e-09	4.59942e-08
BnaA04g13760D	296.722	-4.70765	0.274885	-16.8015	2.37761e-63	8.17591e-61
BnaA04g13920D	125.16	-4.59338	0.387606	-11.3443	7.9156e-30	6.98299e-28
BnaA04g14840D	6.61958	2.216	0.78875	2.46258	0.0137942	0.0478902
BnaA04g15830D	97.1115	2.77392	0.764601	3.70552	0.000210956	0.00128756
BnaA04g16300D	8.46901	-3.09452	0.789619	-3.78941	0.000151007	0.000955832
BnaA04g16660D	7.39737	2.77326	0.792957	3.4237	0.000617756	0.00331884
BnaA04g16960D	22.61	4.35173	0.726568	4.93086	8.18702e-07	8.12418e-06
BnaA04g17040D	302.653	-2.62577	0.210556	-12.448	1.43418e-35	1.68596e-33
BnaA04g17120D	748.66	3.78322	0.179106	21.0362	3.05677e-98	2.4922e-95
BnaA04g17390D	34.8425	-2.53905	0.505084	-4.95126	7.37347e-07	7.37186e-06
BnaA04g17560D	66.9607	-3.55816	0.436027	-7.94401	1.95743e-15	6.29829e-14
BnaA04g17640D	33.4042	-2.01248	0.499281	-3.99991	6.33672e-05	0.00043604
BnaA04g17880D	90.7087	-3.72025	0.666232	-5.4848	4.1393e-08	5.09093e-07
BnaA04g17890D	27.3019	-3.41722	0.594213	-5.38895	7.08724e-08	8.40181e-07
BnaA04g18190D	457.225	2.38646	0.18399	12.9514	2.30573e-38	3.07526e-36
BnaA04g18250D	285.432	2.15282	0.220482	9.74659	1.90771e-22	1.09583e-20
BnaA04g18390D	234.625	-7.8548	0.589858	-7.93526	2.10058e-15	6.72465e-14
BnaA04g18540D	244.967	-7.66009	0.556703	-7.17327	7.3225e-13	1.76092e-11
BnaA04g18550D	166.344	-7.40378	0.604413	-7.5656	3.86084e-14	1.07646e-12
BnaA04g18720D	20.2148	-2.01771	0.595903	-3.34518	0.000822303	0.004258
BnaA04g18780D	11.7661	-3.71102	0.764816	-4.35337	1.34058e-05	0.00010585
BnaA04g18970D	55.5558	3.18928	0.46627	6.60879	3.87467e-11	7.48131e-10
BnaA04g19070D	407.339	-2.25528	0.184262	-12.2296	2.1613e-34	2.39587e-32
BnaA04g19200D	38.4966	-2.23754	0.473027	-4.68758	2.7645e-06	2.49853e-05
BnaA04g19410D	346.96	-4.19619	0.235997	-17.6132	1.9499e-69	7.58195e-67
BnaA04g19580D	106.653	-2.98681	0.337179	-8.78363	1.58288e-18	6.71813e-17
BnaA04g20510D	3.80592	-2.02115	0.796812	-2.71018	0.00672467	0.0262836
BnaA04g20680D	15.6674	-2.47066	0.666069	-3.59422	0.000325366	0.00189045
BnaA04g20850D	99.2683	-2.82623	0.335325	-8.36571	5.97558e-17	2.20643e-15
BnaA04g20860D	76.5554	5.21209	0.564564	7.15865	8.14729e-13	1.94907e-11
BnaA04g20870D	21.1653	-2.04625	0.589528	-3.42645	0.000611531	0.00328959
BnaA04g20900D	6.74744	-2.85737	0.794876	-3.54457	0.000393248	0.00223377
BnaA04g21650D	37.5799	2.46219	0.518655	4.64882	3.33841e-06	2.97205e-05
BnaA04g22640D	54.9323	-3.54119	0.466611	-7.34264	2.09427e-13	5.38745e-12
BnaA04g22670D	15.5648	-4.12637	0.745887	-4.7369	2.17008e-06	1.99918e-05
BnaA04g22990D	23.7643	-4.41472	0.691084	-4.4681	7.89158e-06	6.53953e-05
BnaA04g23170D	18.1148	-2.26283	0.623805	-3.55272	0.000381267	0.00217353
BnaA04g23880D	34.9379	-2.09294	0.499731	-4.156	3.23867e-05	0.000236646
BnaA04g23960D	9.32637	-2.18568	0.747136	-2.82055	0.00479407	0.0196781
BnaA04g24160D	1035.47	-6.28082	0.669878	-9.27763	1.73295e-20	8.48007e-19
BnaA04g24380D	20.1334	-4.15793	0.705965	-4.24863	2.1508e-05	0.000162756
BnaA04g24450D	5.86859	-2.65267	0.798731	-3.34406	0.00082562	0.0042705
BnaA04g24580D	28.0669	3.9394	0.670797	4.71437	2.42457e-06	2.21547e-05
BnaA04g24600D	862.135	-2.0389	0.170099	-11.9832	4.35168e-33	4.471e-31
BnaA04g24660D	33.8369	3.16563	0.560381	5.33065	9.78625e-08	1.13226e-06
BnaA04g24750D	25.6868	3.87749	0.666283	4.65826	3.18896e-06	2.85055e-05
BnaA04g24800D	184.053	-2.07445	0.279383	-7.41417	1.22393e-13	3.24259e-12
BnaA04g24810D	20.2243	3.79968	0.711469	3.85481	0.000115817	0.000752404
BnaA04g25100D	66.6821	-3.14541	0.438838	-7.04939	1.79705e-12	4.12529e-11
BnaA04g25190D	21.9783	2.10512	0.592398	3.47275	0.000515153	0.00282803
BnaA04g25470D	581.182	-2.00815	0.161924	-12.3969	2.71757e-35	3.13632e-33
BnaA04g25830D	422.819	2.19326	0.194433	11.2663	1.92574e-29	1.67835e-27
BnaA04g25840D	199.238	-7.64173	0.596518	-7.76095	8.42938e-15	2.52427e-13
BnaA04g25870D	11.4686	-2.77095	0.727567	-3.50886	0.000450024	0.00251195
BnaA04g26080D	11.7878	-3.70323	0.765381	-4.34735	1.37791e-05	0.000108391
BnaA04g27110D	234.213	-4.72786	0.649923	-7.15328	8.47257e-13	2.02401e-11
BnaA05g00280D	223.817	2.38333	0.247722	9.59159	8.6735e-22	4.72963e-20
BnaA05g00540D	45.3298	-2.2463	0.462738	-4.81569	1.46689e-06	1.39014e-05
BnaA05g00750D	204.515	-2.28141	0.252621	-9.01594	1.95191e-19	8.83321e-18
BnaA05g00830D	14.0967	2.49028	0.696069	3.35272	0.000800224	0.00416329
BnaA05g00890D	25.7188	-2.20567	0.563551	-3.86169	0.000112606	0.000733424
BnaA05g00940D	554.619	-2.26136	0.172473	-13.1038	3.1329e-39	4.29174e-37
BnaA05g01210D	47.2097	-5.15685	0.612564	-6.17001	6.82855e-10	1.11383e-08
BnaA05g01220D	24.3258	-2.00759	0.556911	-3.56915	0.000358138	0.00206003
BnaA05g01680D	51.1908	3.27343	0.521581	6.02901	1.64965e-09	2.53151e-08
BnaA05g01790D	18.0756	2.03794	0.630354	3.15208	0.00162112	0.00771984
BnaA05g02110D	59.2622	5.07672	0.667087	4.95807	7.11954e-07	7.142e-06
BnaA05g02170D	8.82456	-3.27427	0.782332	-3.94297	8.04778e-05	0.000541327
BnaA05g02730D	82.0013	2.47093	0.37023	6.60964	3.85263e-11	7.44445e-10
BnaA05g02750D	23.4705	3.06884	0.630544	4.49622	6.91713e-06	5.79535e-05
BnaA05g03030D	16.6546	2.34636	0.663389	3.38917	0.000701034	0.00370559
BnaA05g04630D	8.42909	2.95889	0.787442	3.60797	0.000308604	0.0018053
BnaA05g04860D	14.3808	-3.63102	0.732122	-3.80929	0.000139365	0.000887809
BnaA05g04870D	9.17742	2.02338	0.757687	2.54411	0.0109556	0.0395343
BnaA05g04890D	889.959	3.24247	0.164015	19.7323	1.1391e-86	6.85481e-84
BnaA05g04970D	7.20857	2.73448	0.793979	3.38525	0.000711135	0.00374947
BnaA05g05210D	17.7874	2.45759	0.653043	3.59116	0.000329207	0.00191057
BnaA05g05360D	135.133	2.70777	0.310288	8.66016	4.71097e-18	1.92044e-16
BnaA05g05370D	1264.33	2.39686	0.136335	17.5719	4.04408e-69	1.56049e-66
BnaA05g05670D	22.424	2.65681	0.617892	4.09969	4.13705e-05	0.000295973
BnaA05g06490D	551.089	3.90597	0.210243	18.4599	4.34279e-76	2.01398e-73
BnaA05g07310D	166.858	-4.35351	0.332048	-12.7949	1.75114e-37	2.21973e-35
BnaA05g07320D	52.5347	-4.01376	0.505111	-7.47291	7.84418e-14	2.11814e-12
BnaA05g07330D	15.6448	2.63005	0.688663	3.55991	0.000370977	0.00212349
BnaA05g07460D	67.7693	-2.18289	0.376192	-5.77553	7.67101e-09	1.0644e-07
BnaA05g08150D	1073.96	4.66366	0.181506	25.5193	1.20486e-143	2.34248e-140
BnaA05g08680D	6.81755	2.58977	0.797609	3.25025	0.00115303	0.00572821
BnaA05g09030D	54.0631	2.66168	0.467942	5.58567	2.32803e-08	2.9815e-07
BnaA05g09130D	11.4828	-3.67077	0.766633	-4.31629	1.58674e-05	0.00012334
BnaA05g09730D	12.9138	-3.84032	0.75935	-4.47454	7.65753e-06	6.35809e-05
BnaA05g10010D	176.445	2.03672	0.258747	7.85113	4.12304e-15	1.27941e-13
BnaA05g10620D	69.9426	-5.97262	0.614264	-5.78275	7.34883e-09	1.02222e-07
BnaA05g10660D	26.0978	-2.44284	0.558164	-4.29896	1.71598e-05	0.00013253
BnaA05g10670D	62.2307	2.57904	0.448743	5.66746	1.44932e-08	1.91685e-07
BnaA05g10770D	99.9182	2.91383	0.354095	8.11929	4.68933e-16	1.59302e-14
BnaA05g10800D	27.9036	2.84869	0.586749	4.62756	3.70005e-06	3.26411e-05
BnaA05g10820D	35.451	-3.8191	0.571451	-6.17816	6.48538e-10	1.06162e-08
BnaA05g10830D	5.54194	-2.44778	0.800818	-3.16502	0.00155073	0.00742521
BnaA05g11170D	482.405	-5.6322	0.265893	-20.5771	4.4013e-94	3.13354e-91
BnaA05g11250D	58.2149	4.44128	0.54577	7.05896	1.67755e-12	3.86325e-11
BnaA05g11760D	19.4317	2.23525	0.645592	3.36058	0.000777801	0.00405707
BnaA05g11790D	25.5333	4.52715	0.717602	5.09047	3.5717e-07	3.76844e-06
BnaA05g11930D	423.208	2.69979	0.202028	13.3331	1.48495e-40	2.14364e-38
BnaA05g11960D	29.8358	2.56287	0.567782	4.37918	1.19128e-05	9.51162e-05
BnaA05g12210D	55.9253	2.23002	0.424045	5.20355	1.9552e-07	2.14902e-06
BnaA05g12530D	430.887	-3.25511	0.194027	-16.732	7.6597e-63	2.58127e-60
BnaA05g12620D	5.20745	-2.13233	0.798117	-2.45177	0.0142157	0.0490942
BnaA05g12800D	7.55574	2.79974	0.792358	3.45044	0.00055967	0.00304332
BnaA05g12820D	6.75668	2.6469	0.796063	3.29661	0.0009786	0.00495515
BnaA05g12840D	88.8765	-2.65089	0.353192	-7.45656	8.88114e-14	2.38161e-12
BnaA05g13100D	81.8641	2.13935	0.361745	5.87626	4.19636e-09	6.03304e-08
BnaA05g13220D	13.124	-2.74985	0.715134	-3.60006	0.000318145	0.00185382
BnaA05g13290D	19.4442	4.14762	0.736109	4.74265	2.1094e-06	1.94719e-05
BnaA05g13790D	49.446	3.38013	0.504763	6.37783	1.79615e-10	3.15803e-09
BnaA05g14090D	4.42312	-2.24403	0.800406	-2.9357	0.00332792	0.0143981
BnaA05g14130D	40.4157	2.13015	0.49455	4.25352	2.10434e-05	0.000159583
BnaA05g14180D	21.0672	3.85977	0.70812	3.90574	9.3938e-05	0.000622832
BnaA05g14370D	12.5231	2.7407	0.743434	3.27434	0.00105911	0.00531277
BnaA05g14410D	14.6553	2.78802	0.70212	3.59895	0.000319504	0.00186022
BnaA05g14420D	69.7556	5.88128	0.655851	6.28556	3.26683e-10	5.55262e-09
BnaA05g14430D	160.213	2.76191	0.287181	9.55146	1.2788e-21	6.89884e-20
BnaA05g14490D	51.9096	5.49087	0.672506	5.94744	2.72368e-09	4.03751e-08
BnaA05g14600D	404.911	-2.06897	0.219047	-9.4393	3.75272e-21	1.95161e-19
BnaA05g14840D	122.63	6.60337	0.628623	6.90055	5.18015e-12	1.12431e-10
BnaA05g14880D	94.4065	-3.35205	0.365821	-9.02814	1.74622e-19	7.95222e-18
BnaA05g14990D	183.069	2.49043	0.269247	9.20983	3.2665e-20	1.56362e-18
BnaA05g15070D	1424.07	3.31105	0.161041	20.5363	1.02017e-93	7.16229e-91
BnaA05g15170D	26.4784	2.07582	0.563043	3.6209	0.000293584	0.00172723
BnaA05g15300D	17.2788	-3.20353	0.673765	-4.34961	1.36381e-05	0.000107449
BnaA05g15510D	22.0867	-4.64457	0.720601	-5.20544	1.93542e-07	2.12941e-06
BnaA05g15530D	14.2575	-3.62844	0.735699	-3.79111	0.000149974	0.000949885
BnaA05g15760D	40.5954	4.82604	0.655333	4.71247	2.44732e-06	2.23423e-05
BnaA05g15980D	55.9499	4.21451	0.536276	7.01273	2.33708e-12	5.28577e-11
BnaA05g16210D	22.8083	-2.01564	0.579836	-3.44115	0.000579253	0.00313833
BnaA05g16300D	10.5534	-3.51996	0.773414	-4.17806	2.94008e-05	0.000216645
BnaA05g16400D	6.74744	-2.85737	0.794876	-3.54457	0.000393248	0.00223377
BnaA05g16690D	6.98933	2.6967	0.794907	3.34638	0.000818745	0.00424392
BnaA05g16960D	12.3616	-3.78413	0.761616	-4.42147	9.80331e-06	7.99012e-05
BnaA05g17230D	284.833	2.7335	0.231816	11.7493	7.1235e-32	6.88501e-30
BnaA05g17490D	134.511	-2.29082	0.287789	-7.9384	2.04801e-15	6.5772e-14
BnaA05g17570D	4.3595	2.06509	0.800002	2.69375	0.0070654	0.0273992
BnaA05g17690D	17.4095	-3.66512	0.700666	-4.34279	1.40682e-05	0.00011051
BnaA05g18060D	9.05275	3.06034	0.784075	3.70768	0.000209163	0.00127739
BnaA05g18070D	16.5965	-2.94409	0.667934	-4.13709	3.51738e-05	0.000255057
BnaA05g18870D	81.127	-2.64996	0.759564	-3.54905	0.000386619	0.00220081
BnaA05g18980D	113.689	-6.90589	0.621579	-7.15298	8.4916e-13	2.0276e-11
BnaA05g19010D	98.5455	-6.42987	0.597638	-6.164	7.09282e-10	1.15396e-08
BnaA05g19050D	315.055	7.81135	0.589353	7.9028	2.72698e-15	8.62076e-14
BnaA05g19060D	7.09405	2.61678	0.797294	3.28217	0.00103013	0.00518699
BnaA05g19380D	41.203	-5.53916	0.677463	-5.99253	2.06601e-09	3.11839e-08
BnaA05g19520D	16.2784	3.86534	0.750599	4.48265	7.37226e-06	6.13534e-05
BnaA05g19570D	48.9248	-3.73867	0.494164	-7.20918	5.62879e-13	1.37454e-11
BnaA05g19640D	104.123	2.05008	0.383386	5.32507	1.00913e-07	1.16489e-06
BnaA05g19670D	233.412	-2.34615	0.227354	-10.3022	6.88722e-25	4.58082e-23
BnaA05g20120D	139.367	3.29049	0.323284	10.0316	1.10703e-23	6.88306e-22
BnaA05g20180D	15.3448	3.43276	0.730248	3.53495	0.000407855	0.00230534
BnaA05g20210D	47.8232	-2.29597	0.439653	-5.18206	2.19448e-07	2.39846e-06
BnaA05g20460D	4.69921	-2.33644	0.800859	-3.02793	0.00246234	0.0110985
BnaA05g20480D	43.6232	-2.56356	0.463855	-5.45729	4.83459e-08	5.88168e-07
BnaA05g20780D	4.40867	-2.24835	0.800452	-2.93824	0.00330085	0.0143008
BnaA05g20830D	10.9853	2.94498	0.756647	3.11136	0.00186227	0.00871305
BnaA05g21090D	98.7546	2.21294	0.333139	6.60402	4.00146e-11	7.71433e-10
BnaA05g21260D	282.308	3.3535	0.273025	12.1977	3.19678e-34	3.51292e-32
BnaA05g21390D	18.9789	4.1144	0.737709	4.71182	2.4551e-06	2.24013e-05
BnaA05g21630D	23.2069	2.28941	0.604142	3.68659	0.000227275	0.00137472
BnaA05g21770D	15.9064	-2.71322	0.666421	-3.88274	0.000103286	0.000678054
BnaA05g22080D	7.3577	-2.09536	0.768606	-2.61001	0.00905404	0.0337407
BnaA05g22580D	8.90544	2.23767	0.771107	2.68286	0.0072996	0.0281928
BnaA05g22790D	15.435	-2.20979	0.65308	-3.31072	0.000930555	0.00474641
BnaA05g23060D	597.497	2.21443	0.168689	13.1156	2.68218e-39	3.70442e-37
BnaA05g23180D	4.76754	2.15014	0.800661	2.78987	0.00527294	0.0213695
BnaA05g23950D	226.463	2.93401	0.251596	11.5934	4.44892e-31	4.18009e-29
BnaA05g24540D	672.252	-2.63168	0.169534	-15.5109	2.92835e-54	7.70964e-52
BnaA05g24740D	72.1023	4.74729	0.532746	7.62778	2.38838e-14	6.81321e-13
BnaA05g24750D	700.673	5.95446	0.278088	20.5898	3.39045e-94	2.44834e-91
BnaA05g24860D	143.642	-2.0826	0.278057	-7.47541	7.69655e-14	2.0805e-12
BnaA05g25050D	2658.37	-2.36575	0.35089	-6.74146	1.56801e-11	3.17808e-10
BnaA05g25160D	79.6338	-2.05959	0.377635	-5.43748	5.40395e-08	6.52878e-07
BnaA05g25240D	94.9258	2.95019	0.7998	4.0262	5.66859e-05	0.00039398
BnaA05g25270D	7.21996	-2.22815	0.779212	-2.70235	0.00688517	0.0268238
BnaA05g25700D	66.2221	2.19375	0.393935	5.52142	3.36276e-08	4.19817e-07
BnaA05g26020D	49.043	-2.52346	0.442103	-5.64922	1.61173e-08	2.11504e-07
BnaA05g26030D	27.7088	3.14376	0.60585	4.83323	1.34337e-06	1.28124e-05
BnaA05g26040D	39.6909	4.05033	0.594362	5.8919	3.81789e-09	5.5219e-08
BnaA05g26090D	158.165	2.28328	0.299662	7.59096	3.1754e-14	8.95722e-13
BnaA05g26140D	52.8024	-3.23088	0.471418	-6.69171	2.20572e-11	4.37757e-10
BnaA05g26220D	22.8468	3.01193	0.637721	4.37863	1.19428e-05	9.53404e-05
BnaA05g26280D	295.722	-2.16815	0.206399	-10.4941	9.19684e-26	6.43003e-24
BnaA05g26470D	10.4487	3.26747	0.776153	3.9095	9.24874e-05	0.00061402
BnaA05g26500D	9.91439	-3.0572	0.762265	-3.30793	0.000939885	0.00478548
BnaA05g26530D	16.7266	3.93569	0.746333	4.54558	5.47834e-06	4.67305e-05
BnaA05g26660D	41.7985	-5.55806	0.676653	-6.00898	1.86691e-09	2.83651e-08
BnaA05g26780D	134.97	3.34509	0.334755	9.83573	7.89959e-23	4.64631e-21
BnaA05g26800D	17.7644	2.15077	0.637717	3.27171	0.001069	0.00535654
BnaA05g26920D	51.5496	-2.11325	0.430466	-4.88182	1.05113e-06	1.02435e-05
BnaA05g27200D	87.059	-2.26588	0.34923	-6.46123	1.03853e-10	1.89518e-09
BnaA05g27230D	15.4858	-2.57008	0.679692	-3.64505	0.000267341	0.00158725
BnaA05g27250D	416.513	-2.41147	0.190263	-12.662	9.60725e-37	1.17873e-34
BnaA05g27350D	114.188	3.45718	0.377803	8.96079	3.22373e-19	1.43447e-17
BnaA05g27550D	195.451	-2.26844	0.248074	-9.12773	6.99507e-20	3.27402e-18
BnaA05g27940D	6.798	-2.83263	0.79566	-3.52652	0.000421062	0.00236943
BnaA05g28010D	6.80838	2.257	0.787264	2.49965	0.0124316	0.0439413
BnaA05g28110D	1300.83	8.74087	0.434355	14.8673	5.37357e-50	1.16579e-47
BnaA05g29010D	1500.79	2.66261	0.149871	17.7564	1.53855e-70	6.12377e-68
BnaA05g29070D	197.055	2.19944	0.253086	8.66602	4.47477e-18	1.8271e-16
BnaA05g29090D	68.8017	4.85973	0.551426	7.28928	3.11626e-13	7.84482e-12
BnaA05g29200D	19.5314	-2.45415	0.619559	-3.86543	0.000110895	0.0007234
BnaA05g29310D	46.2373	-3.22352	0.494872	-6.33811	2.32601e-10	4.02387e-09
BnaA05g29820D	8.44673	-2.84726	0.774449	-3.10073	0.00193042	0.00898867
BnaA05g29830D	42.6123	-5.5856	0.675375	-6.03275	1.61189e-09	2.47808e-08
BnaA05g30280D	378.249	2.74941	0.202442	13.5438	8.62592e-42	1.30548e-39
BnaA05g30670D	67.5118	2.39697	0.39988	5.93016	3.02634e-09	4.44813e-08
BnaA05g30680D	39.3534	-2.43591	0.475444	-5.06393	4.1071e-07	4.28414e-06
BnaA05g30820D	185.616	2.53142	0.271183	9.2933	1.49579e-20	7.35515e-19
BnaA05g31280D	16.4942	-4.21247	0.74175	-4.81551	1.46823e-06	1.39114e-05
BnaA05g31340D	206.272	-4.70346	0.314074	-14.5541	5.49821e-48	1.09421e-45
BnaA05g31400D	35.7944	2.43212	0.543736	4.38204	1.17572e-05	9.40369e-05
BnaA05g31900D	8.35842	2.86416	0.791314	3.52601	0.000421877	0.00237332
BnaA05g32420D	187.742	-2.01339	0.243092	-8.27161	1.32165e-16	4.72476e-15
BnaA05g32570D	14.3732	2.51432	0.695188	3.38673	0.000707305	0.00373405
BnaA05g32630D	7.03318	2.70838	0.794588	3.35772	0.000785891	0.00409251
BnaA05g32970D	8.10874	2.90868	0.789012	3.5576	0.000374259	0.00213888
BnaA05g33640D	5.15856	2.28435	0.800788	2.92448	0.00345031	0.0148548
BnaA06g00200D	520.787	-2.16508	0.196946	-10.9878	4.37686e-28	3.49519e-26
BnaA06g00850D	164.966	-2.93643	0.276749	-10.5576	4.68624e-26	3.34583e-24
BnaA06g01110D	12.0205	-3.71754	0.765131	-4.36237	1.28663e-05	0.000101988
BnaA06g01410D	61.3915	2.5375	0.423964	5.90169	3.59792e-09	5.2298e-08
BnaA06g01430D	27.0693	-2.80591	0.579552	-4.70167	2.58046e-06	2.34604e-05
BnaA06g01440D	6.84438	2.67112	0.795451	3.32013	0.000899769	0.00460815
BnaA06g01450D	8.80669	3.02363	0.78525	3.67144	0.000241192	0.0014485
BnaA06g01670D	41.2552	2.3873	0.486939	4.81757	1.45314e-06	1.37814e-05
BnaA06g01740D	58.1227	-2.39914	0.41946	-5.67892	1.35547e-08	1.80214e-07
BnaA06g02010D	112.888	5.56288	0.523904	8.47661	2.31855e-17	8.8923e-16
BnaA06g02350D	72.5161	2.50641	0.408204	6.0717	1.26562e-09	1.98559e-08
BnaA06g02430D	6.75466	-2.86682	0.794597	-3.55249	0.000381609	0.00217499
BnaA06g02440D	115.548	-6.93412	0.620084	-7.17594	7.18098e-13	1.72853e-11
BnaA06g02710D	11.9323	3.43779	0.769464	4.07595	4.58265e-05	0.00032471
BnaA06g02740D	10.7988	2.29577	0.737711	2.91306	0.00357902	0.0153319
BnaA06g02820D	48.8387	-2.00717	0.456574	-4.37445	1.21739e-05	9.69864e-05
BnaA06g02940D	58.915	-2.03583	0.39379	-5.14733	2.64218e-07	2.84594e-06
BnaA06g02980D	322.615	7.3735	0.527812	8.76754	1.82608e-18	7.71148e-17
BnaA06g03070D	26.9969	-4.59976	0.6782	-4.63758	3.52504e-06	3.12884e-05
BnaA06g03200D	5.86137	-2.63861	0.79898	-3.33241	0.000860978	0.00443283
BnaA06g03210D	141.937	2.70168	0.311613	8.60862	7.39462e-18	2.97604e-16
BnaA06g03230D	14.2935	3.31669	0.73662	3.43798	0.000586076	0.00317054
BnaA06g03240D	12.5075	-2.03173	0.68622	-2.89897	0.00374391	0.0159289
BnaA06g03350D	42.5259	2.04615	0.463975	4.36179	1.29e-05	0.000102191
BnaA06g03540D	28.5372	-2.10678	0.538531	-3.8711	0.000108346	0.000708786
BnaA06g03570D	6.77633	-2.86942	0.794545	-3.55537	0.000377452	0.00215372
BnaA06g03590D	18.2212	2.50266	0.650454	3.66458	0.000247742	0.00148361
BnaA06g03700D	76.9617	-2.98445	0.381198	-7.73657	1.02137e-14	3.0388e-13
BnaA06g04010D	11.7405	3.03605	0.752265	3.19192	0.00141329	0.00684559
BnaA06g04040D	164.951	3.64581	0.331522	10.8064	3.20926e-27	2.44315e-25
BnaA06g04320D	7.96739	-3.09557	0.788561	-3.77603	0.00015935	0.00100299
BnaA06g04340D	67.6148	-2.91957	0.71007	-4.11263	3.91175e-05	0.000281233
BnaA06g04740D	35.9312	-2.8114	0.532566	-5.16733	2.37459e-07	2.57638e-06
BnaA06g05200D	19.1279	2.11782	0.627954	3.28407	0.00102318	0.00515663
BnaA06g05310D	12.0426	-2.11216	0.693527	-2.97066	0.00297161	0.0130585
BnaA06g05400D	8.79567	-3.24773	0.783585	-3.9207	8.82912e-05	0.000588325
BnaA06g05490D	12.4335	2.51943	0.722371	3.21865	0.00128796	0.00631537
BnaA06g05680D	9.31876	-2.60513	0.761311	-3.14199	0.00167805	0.00795345
BnaA06g05710D	5.45465	-2.1783	0.797515	-2.49824	0.0124813	0.0440831
BnaA06g05810D	18.2674	-2.06877	0.614332	-3.31645	0.000911695	0.00465931
BnaA06g05940D	211.225	-2.54964	0.261622	-9.72367	2.39e-22	1.3605e-20
BnaA06g05970D	17.9974	-4.31673	0.737535	-4.91262	8.98679e-07	8.85696e-06
BnaA06g06370D	87.8198	2.36173	0.360542	6.4992	8.07484e-11	1.4946e-09
BnaA06g06510D	14.154	2.50443	0.694029	3.37769	0.000730969	0.00384213
BnaA06g07640D	8.32861	2.50323	0.779116	2.72675	0.00639612	0.0251914
BnaA06g07870D	8.43395	2.2223	0.766881	2.66814	0.00762729	0.0292772
BnaA06g07920D	6.93207	2.68678	0.795085	3.33627	0.000849115	0.00437622
BnaA06g07930D	87.3103	4.3553	0.461293	8.72827	2.58587e-18	1.07938e-16
BnaA06g08060D	11.4683	-3.67221	0.766506	-4.31723	1.57999e-05	0.000122853
BnaA06g08180D	45.5047	2.6339	0.472783	5.45081	5.01399e-08	6.08529e-07
BnaA06g08550D	94.7255	-2.0009	0.32557	-6.13027	8.77313e-10	1.40964e-08
BnaA06g08680D	2507.97	10.0578	0.478481	11.7296	8.98401e-32	8.66666e-30
BnaA06g08690D	10.5144	2.56093	0.745753	3.07187	0.00212725	0.00977548
BnaA06g08700D	211.417	4.32843	0.319038	13.1852	1.06815e-39	1.50401e-37
BnaA06g08740D	39.1441	4.03017	0.595543	5.85533	4.76065e-09	6.81331e-08
BnaA06g08750D	53.6513	2.7518	0.451134	5.9721	2.34225e-09	3.50498e-08
BnaA06g08790D	16.117	3.50009	0.726507	3.59335	0.000326459	0.00189636
BnaA06g08850D	19.8727	2.31895	0.625134	3.58526	0.000336737	0.00194913
BnaA06g08940D	107.204	-3.4735	0.356128	-9.6099	7.26188e-22	3.97704e-20
BnaA06g08980D	109.86	-2.59471	0.315617	-8.17999	2.83857e-16	9.8078e-15
BnaA06g08990D	21.9071	3.65091	0.678981	4.38465	1.16173e-05	9.30063e-05
BnaA06g09220D	85.3904	3.76853	0.424567	8.51299	1.69497e-17	6.55541e-16
BnaA06g09370D	22.8274	-3.6268	0.650452	-4.98979	6.04451e-07	6.13049e-06
BnaA06g09710D	14.4646	3.55872	0.767954	4.2087	2.56844e-05	0.00019138
BnaA06g09930D	15.6894	3.43876	0.730738	3.54511	0.000392454	0.00223076
BnaA06g10010D	153.369	-4.64754	0.363446	-12.3266	6.51475e-35	7.35076e-33
BnaA06g10110D	185.123	2.27235	0.264744	8.5552	1.17661e-17	4.63213e-16
BnaA06g10170D	740.505	2.42745	0.160184	15.1402	8.79346e-52	2.02046e-49
BnaA06g10320D	59.6734	2.37846	0.42571	5.52159	3.35951e-08	4.19619e-07
BnaA06g10410D	10.8262	2.09615	0.723218	2.76436	0.00570346	0.0228722
BnaA06g11010D	1295.61	-8.39048	0.346003	-21.1305	4.17078e-99	3.51381e-96
BnaA06g12120D	16.0002	-3.52784	0.709811	-4.17751	2.94717e-05	0.000217103
BnaA06g12540D	32.0219	3.37677	0.585015	5.32319	1.01962e-07	1.1762e-06
BnaA06g12550D	4.44719	2.08507	0.800208	2.71608	0.00660607	0.0258801
BnaA06g12720D	225.672	-3.52942	0.269572	-13.0012	1.20388e-38	1.61848e-36
BnaA06g12970D	49.9336	-5.80017	0.666008	-6.21806	5.03331e-10	8.36111e-09
BnaA06g13130D	12.5147	-3.0945	0.731569	-3.71849	0.00020042	0.0012295
BnaA06g13160D	17.5541	2.60924	0.665624	3.69544	0.00021951	0.00133364
BnaA06g13410D	59.487	-2.85704	0.416093	-6.77598	1.23568e-11	2.53912e-10
BnaA06g13510D	10.8622	2.33849	0.732245	2.97442	0.00293538	0.0129251
BnaA06g13520D	13.8349	2.06637	0.684556	2.91655	0.0035393	0.0151849
BnaA06g13770D	19.8949	2.31233	0.631098	3.54312	0.000395416	0.00224407
BnaA06g14090D	24.7434	3.5376	0.658823	4.65616	3.22164e-06	2.87671e-05
BnaA06g15060D	16.7992	-4.23291	0.740979	-4.83476	1.33303e-06	1.27259e-05
BnaA06g15160D	143.12	-2.04412	0.275909	-7.39522	1.41179e-13	3.71691e-12
BnaA06g15180D	172.521	2.03943	0.262017	7.76305	8.29077e-15	2.48866e-13
BnaA06g15780D	9.15872	-2.42512	0.749453	-3.04268	0.0023448	0.0106436
BnaA06g16330D	67.1615	-4.66311	0.498565	-8.47997	2.25247e-17	8.65856e-16
BnaA06g16820D	8.75945	-2.87905	0.77028	-3.14829	0.00164229	0.00780741
BnaA06g17620D	7.7524	2.44198	0.780039	2.66674	0.00765905	0.0293835
BnaA06g18330D	4.37291	2.02936	0.799364	2.66424	0.00771635	0.0295652
BnaA06g18340D	5.20241	2.29693	0.800735	2.93732	0.00331058	0.014335
BnaA06g18640D	12.3327	-3.77555	0.762133	-4.41405	1.01456e-05	8.24521e-05
BnaA06g18650D	5.30196	-2.50888	0.800332	-3.2009	0.00136999	0.00666459
BnaA06g18680D	7.08132	-2.92106	0.793401	-3.60769	0.000308933	0.00180681
BnaA06g18900D	5.39121	2.34449	0.800464	2.98668	0.00282028	0.0124737
BnaA06g19130D	750.63	2.30753	0.163889	14.0689	5.89753e-45	1.02445e-42
BnaA06g19450D	96.2389	-2.89948	0.34166	-8.41477	3.93658e-17	1.485e-15
BnaA06g19630D	11.263	2.34648	0.737695	2.97094	0.00296892	0.0130512
BnaA06g19660D	174.869	2.82413	0.297713	9.42456	4.31912e-21	2.23925e-19
BnaA06g19680D	29.721	4.71854	0.709093	5.26477	1.40367e-07	1.58203e-06
BnaA06g20920D	301.179	2.00184	0.23302	8.5791	9.562e-18	3.8089e-16
BnaA06g22020D	12.9427	-3.85502	0.758386	-4.48693	7.22571e-06	6.03026e-05
BnaA06g22170D	37.9348	-5.4255	0.682633	-5.89373	3.77585e-09	5.46893e-08
BnaA06g22180D	26.7209	-4.91786	0.707371	-5.44895	5.0667e-08	6.14483e-07
BnaA06g22190D	26.8372	-4.07329	0.639465	-5.39973	6.67411e-08	7.94933e-07
BnaA06g22590D	103.817	3.98842	0.409583	9.33047	1.05407e-20	5.26502e-19
BnaA06g23500D	78.1399	-2.07611	0.355861	-5.81335	6.12367e-09	8.60804e-08
BnaA06g23720D	251.55	-3.22816	0.49627	-6.48179	9.06408e-11	1.66793e-09
BnaA06g24050D	57.0655	-5.99047	0.657273	-6.38053	1.76482e-10	3.10727e-09
BnaA06g24680D	286.113	2.20893	0.216519	10.1822	2.38185e-24	1.54161e-22
BnaA06g26630D	5.15856	2.28435	0.800788	2.92448	0.00345031	0.0148548
BnaA06g26650D	10.5895	-3.55119	0.771624	-4.20416	2.62054e-05	0.000194889
BnaA06g26660D	8.54847	-3.21451	0.784568	-3.88776	0.000101172	0.000665678
BnaA06g27710D	72.3732	2.29705	0.392073	5.80748	6.34194e-09	8.89509e-08
BnaA06g28330D	7.87053	2.42733	0.781676	2.65952	0.00782519	0.0299011
BnaA06g28610D	269.836	2.62128	0.230632	11.3273	9.6109e-30	8.44907e-28
BnaA06g28980D	23.6505	-2.0976	0.568925	-3.64467	0.00026773	0.00158918
BnaA06g29110D	26.3761	2.28123	0.566764	3.92887	8.53458e-05	0.000570352
BnaA06g29940D	7.92405	-3.10196	0.788217	-3.77996	0.000156854	0.000989001
BnaA06g30530D	8.8108	-2.08469	0.749755	-2.69671	0.00700289	0.0272111
BnaA06g30970D	3.80592	-2.02115	0.796812	-2.71018	0.00672467	0.0262836
BnaA06g30990D	959.964	5.98033	0.242835	23.9318	1.42856e-126	2.06321e-123
BnaA06g31010D	362.132	2.37862	0.20126	11.7966	4.06192e-32	3.98691e-30
BnaA06g31080D	31.8995	-2.42018	0.53753	-4.43702	9.12128e-06	7.48129e-05
BnaA06g31160D	24.8615	-4.48946	0.686481	-4.53123	5.86401e-06	4.97099e-05
BnaA06g31580D	7.14671	-2.30116	0.779168	-2.74219	0.00610303	0.0242286
BnaA06g32010D	46.4055	-2.15196	0.44308	-4.82402	1.40694e-06	1.33733e-05
BnaA06g32280D	706.8	-5.38739	0.481011	-11.0712	1.73002e-28	1.41736e-26
BnaA06g32310D	45.6739	2.24292	0.492582	4.49694	6.89383e-06	5.77713e-05
BnaA06g32330D	77.2608	2.28001	0.39582	5.71485	1.09801e-08	1.48088e-07
BnaA06g32380D	488.614	-2.32007	0.174502	-13.2855	2.8096e-40	4.00063e-38
BnaA06g32410D	86.362	-2.17986	0.342573	-6.33951	2.30496e-10	3.99018e-09
BnaA06g32560D	25.4895	4.52552	0.717662	5.08893	3.60098e-07	3.79696e-06
BnaA06g33030D	30.5345	-3.58186	0.580234	-5.75613	8.60651e-09	1.18381e-07
BnaA06g33360D	28.3608	2.13376	0.795538	2.76538	0.00568573	0.0228083
BnaA06g33570D	85.6356	5.16205	0.540899	7.78197	7.14057e-15	2.15878e-13
BnaA06g34160D	498.448	-2.4931	0.177493	-14.0335	9.72951e-45	1.66718e-42
BnaA06g34380D	345.501	7.68483	0.552857	7.03312	2.01959e-12	4.60272e-11
BnaA06g34540D	81.5938	4.04262	0.453129	8.4047	4.28967e-17	1.6074e-15
BnaA06g34550D	15.1724	3.79238	0.753241	4.41164	1.02592e-05	8.32415e-05
BnaA06g34560D	11.8007	3.43578	0.769262	4.07251	4.65101e-05	0.000328955
BnaA06g34570D	122.602	2.24438	0.304941	7.32427	2.40204e-13	6.14476e-12
BnaA06g35330D	34.5288	4.94176	0.697652	5.46344	4.67e-08	5.69652e-07
BnaA06g36310D	4.75413	2.02519	0.798938	2.68398	0.00727515	0.0281199
BnaA06g37020D	41.9022	2.01751	0.468211	4.26318	2.01539e-05	0.00015359
BnaA07g00120D	6.65557	2.63254	0.79629	3.28116	0.00103382	0.00520399
BnaA07g00220D	73.3137	2.93898	0.405595	7.10943	1.16525e-12	2.73202e-11
BnaA07g00410D	38.1424	-2.14614	0.498818	-4.27159	1.94081e-05	0.000148353
BnaA07g00460D	1430.42	-4.11733	0.144553	-28.4304	8.50692e-178	4.30017e-174
BnaA07g01020D	47.9581	5.38061	0.677631	5.85138	4.87499e-09	6.96119e-08
BnaA07g01030D	33.7101	3.79241	0.611408	5.4442	5.2039e-08	6.29913e-07
BnaA07g01140D	8.3767	2.23211	0.764638	2.6808	0.00734467	0.0283344
BnaA07g01250D	46.0119	2.57317	0.470826	5.35746	8.44004e-08	9.86897e-07
BnaA07g01490D	6.78712	2.65058	0.795945	3.30085	0.000963939	0.00489267
BnaA07g01580D	10.7385	2.08585	0.723908	2.74908	0.00597632	0.0238041
BnaA07g01640D	59.6979	5.67784	0.664324	6.10984	9.97287e-10	1.58928e-08
BnaA07g01650D	8.47293	2.96162	0.787406	3.61129	0.000304673	0.00178437
BnaA07g01700D	11.7569	3.43333	0.769314	4.06983	4.70469e-05	0.000332333
BnaA07g02200D	319.829	-7.43759	0.478265	-11.502	1.28827e-30	1.17759e-28
BnaA07g02300D	8.53402	-3.22276	0.784147	-3.8941	9.85643e-05	0.000650689
BnaA07g02330D	28.7479	-2.71774	0.548202	-4.83882	1.30614e-06	1.24975e-05
BnaA07g02340D	76.4818	-4.04414	0.438844	-8.84511	9.14415e-19	3.96454e-17
BnaA07g02360D	5.1013	2.26159	0.800854	2.90225	0.00370495	0.0157897
BnaA07g02410D	41.2162	2.24551	0.481087	4.59979	4.22922e-06	3.68781e-05
BnaA07g02530D	136.698	-7.15386	0.612403	-7.35854	1.85926e-13	4.82463e-12
BnaA07g02920D	170.196	2.14515	0.263361	8.12022	4.65332e-16	1.58185e-14
BnaA07g03480D	19.1018	-4.43515	0.730767	-5.01688	5.25166e-07	5.38034e-06
BnaA07g03530D	5.58528	-2.58845	0.799546	-3.27918	0.00104109	0.00523225
BnaA07g03710D	10752.7	2.49551	0.104268	23.9322	1.417e-126	2.06321e-123
BnaA07g03740D	454.637	2.03774	0.182411	11.1604	6.3677e-29	5.32034e-27
BnaA07g03760D	9.62278	3.07576	0.784529	3.73226	0.00018977	0.00117041
BnaA07g03770D	111.783	2.1832	0.315359	6.88867	5.63159e-12	1.21758e-10
BnaA07g03990D	327.35	2.72058	0.219682	12.3462	5.10399e-35	5.81085e-33
BnaA07g04280D	79.3738	-3.34964	0.391441	-8.40772	4.18064e-17	1.57004e-15
BnaA07g04810D	43.6863	5.25097	0.683716	5.73787	9.58735e-09	1.30488e-07
BnaA07g05160D	57.1924	2.98079	0.462939	6.27594	3.47538e-10	5.8873e-09
BnaA07g05660D	263.608	2.08356	0.221919	9.37191	7.12325e-21	3.62612e-19
BnaA07g06370D	48.0205	2.13124	0.447296	4.71333	2.43698e-06	2.2256e-05
BnaA07g06500D	236.139	3.67725	0.274042	13.2494	4.54753e-40	6.43902e-38
BnaA07g06510D	12.4237	2.53389	0.719586	3.24384	0.0011793	0.00584381
BnaA07g06730D	6.64216	2.60908	0.796886	3.26075	0.00111119	0.00554269
BnaA07g06820D	129.103	3.82604	0.359014	10.3577	3.86269e-25	2.59994e-23
BnaA07g06900D	382.973	-8.24252	0.541514	-7.64927	2.0213e-14	5.85193e-13
BnaA07g07010D	38.8804	4.24238	0.611146	5.72149	1.05592e-08	1.42754e-07
BnaA07g07020D	4.86865	2.20309	0.80087	2.8405	0.00450428	0.018669
BnaA07g07200D	29.103	-5.04896	0.700609	-5.56414	2.63444e-08	3.34426e-07
BnaA07g07210D	14.722	-4.0452	0.749653	-4.66242	3.1252e-06	2.79751e-05
BnaA07g07310D	35.2042	2.12388	0.510356	4.10155	4.10393e-05	0.000293921
BnaA07g07350D	11.144	2.05941	0.737662	2.68072	0.00734634	0.0283386
BnaA07g07500D	75.2885	-6.36567	0.641672	-6.69917	2.09602e-11	4.17625e-10
BnaA07g07690D	158.82	2.00608	0.270968	7.38302	1.54734e-13	4.05058e-12
BnaA07g07800D	72.5169	3.10324	0.415087	7.3036	2.80177e-13	7.1062e-12
BnaA07g08050D	25.2754	-4.84504	0.710595	-5.38379	7.29346e-08	8.62201e-07
BnaA07g08110D	73.3824	2.09444	0.371854	5.59425	2.21572e-08	2.84415e-07
BnaA07g08270D	32.9739	-5.22342	0.692373	-5.71769	1.0798e-08	1.45749e-07
BnaA07g08280D	118.261	-3.13311	0.323201	-9.60734	7.44449e-22	4.07264e-20
BnaA07g08330D	3.82036	-2.05099	0.797608	-2.73541	0.00623021	0.0246482
BnaA07g08440D	30.019	-2.39264	0.531271	-4.4369	9.12616e-06	7.48351e-05
BnaA07g08950D	15.2815	-4.10328	0.746851	-4.71536	2.41278e-06	2.20549e-05
BnaA07g09000D	59.1825	-2.54438	0.406236	-6.20779	5.37363e-10	8.89138e-09
BnaA07g09050D	245.523	5.06851	0.34706	13.8623	1.07211e-43	1.75386e-41
BnaA07g09250D	12.693	2.57172	0.716859	3.29532	0.000983087	0.00497587
BnaA07g09270D	109.256	-2.50245	0.314775	-7.91438	2.48494e-15	7.8951e-14
BnaA07g09420D	1317.16	-2.10133	0.143788	-14.6114	2.37536e-48	4.78376e-46
BnaA07g09550D	95.4836	2.27519	0.345363	6.54519	5.9419e-11	1.11954e-09
BnaA07g09610D	15.2601	3.7938	0.753357	4.41361	1.01659e-05	8.25771e-05
BnaA07g09650D	117.879	6.5468	0.631049	6.85328	7.21738e-12	1.53937e-10
BnaA07g09660D	77.4026	6.00894	0.651147	6.39569	1.59825e-10	2.83375e-09
BnaA07g09700D	10.5678	-3.53946	0.772286	-4.19419	2.7385e-05	0.000203093
BnaA07g10010D	8.54423	2.58443	0.774139	2.79213	0.0052363	0.0212363
BnaA07g10020D	207.248	4.44017	0.326532	13.1579	1.53387e-39	2.13597e-37
BnaA07g10480D	73.4254	3.38452	0.429178	7.639	2.18914e-14	6.28386e-13
BnaA07g10570D	217.202	2.04591	0.242613	8.41522	3.92168e-17	1.48049e-15
BnaA07g10850D	15.0198	-4.07358	0.748358	-4.68858	2.75106e-06	2.48861e-05
BnaA07g10960D	9.07917	-2.18771	0.741778	-2.83684	0.00455631	0.0188522
BnaA07g11240D	163.539	2.69949	0.324654	8.26653	1.37917e-16	4.91648e-15
BnaA07g11250D	42.089	-5.56834	0.676149	-6.01784	1.76764e-09	2.70274e-08
BnaA07g11330D	7.39737	2.77326	0.792957	3.4237	0.000617756	0.00331884
BnaA07g11340D	36.2583	-2.428	0.495408	-4.83914	1.30403e-06	1.24797e-05
BnaA07g11350D	6.56788	2.60957	0.79682	3.25858	0.0011197	0.00558135
BnaA07g11420D	46.4234	2.65186	0.484754	5.35439	8.5846e-08	1.00265e-06
BnaA07g11430D	235.019	3.63951	0.278879	12.8937	4.88426e-38	6.36326e-36
BnaA07g11460D	81.8128	2.03247	0.363707	5.5575	2.73671e-08	3.46538e-07
BnaA07g11560D	6.71283	2.63148	0.796451	3.282	0.00103075	0.00518959
BnaA07g11700D	9.46343	-3.30753	0.782182	-3.98459	6.75967e-05	0.000461937
BnaA07g12070D	94.8393	-2.04285	0.345711	-5.89283	3.79639e-09	5.49552e-08
BnaA07g12150D	181.711	3.2676	0.291958	11.0737	1.68372e-28	1.38166e-26
BnaA07g12180D	9.95418	2.46164	0.753975	2.94909	0.00318709	0.0138823
BnaA07g12510D	18.7091	2.09004	0.627297	3.24525	0.00117349	0.0058184
BnaA07g12700D	233.829	4.43646	0.311124	13.8559	1.17201e-43	1.91109e-41
BnaA07g13070D	22.0301	4.32314	0.727562	4.90419	9.38135e-07	9.21706e-06
BnaA07g13250D	20.3175	4.19804	0.734015	4.79016	1.66648e-06	1.56142e-05
BnaA07g13630D	434.736	2.19673	0.185824	11.807	3.59045e-32	3.53789e-30
BnaA07g14100D	863.583	-7.41953	0.316433	-21.5078	1.31488e-102	1.16607e-99
BnaA07g14170D	30.6352	-5.1134	0.697892	-5.62156	1.89243e-08	2.46103e-07
BnaA07g14190D	10.2845	-3.5049	0.77356	-4.16096	3.16914e-05	0.000232068
BnaA07g14340D	17.3978	3.95165	0.746782	4.56404	5.01796e-06	4.30942e-05
BnaA07g14420D	728.462	2.68969	0.203983	13.1703	1.30143e-39	1.81729e-37
BnaA07g15010D	24.4413	-2.43192	0.569279	-4.19147	2.77158e-05	0.000205335
BnaA07g15130D	101.149	-2.36644	0.333059	-7.07613	1.48232e-12	3.43243e-11
BnaA07g15140D	97.7381	-2.76367	0.349896	-7.8456	4.30895e-15	1.33382e-13
BnaA07g15200D	16.5158	2.35097	0.659653	3.41122	0.000646739	0.00345436
BnaA07g15430D	123.864	5.68414	0.520819	8.67038	4.30699e-18	1.76001e-16
BnaA07g15560D	7.00274	2.66167	0.796069	3.31682	0.000910479	0.00465498
BnaA07g15580D	17.767	-2.27133	0.637689	-3.49226	0.000478951	0.00265001
BnaA07g15630D	6.37907	2.57108	0.797544	3.21929	0.00128508	0.00630428
BnaA07g15650D	26.3658	-3.43582	0.612564	-5.23524	1.64771e-07	1.83418e-06
BnaA07g15670D	731.352	2.07229	0.159285	13.0021	1.19076e-38	1.60512e-36
BnaA07g15720D	9.60701	2.38268	0.760066	2.8559	0.00429155	0.0178988
BnaA07g16060D	600.253	6.13152	0.308416	18.8105	6.1927e-79	3.09936e-76
BnaA07g16120D	104.339	2.01526	0.318708	6.29603	3.05361e-10	5.21437e-09
BnaA07g16210D	25.0722	-2.68581	0.582394	-4.48849	7.17299e-06	5.9912e-05
BnaA07g16400D	24.0342	2.02398	0.574572	3.45754	0.000545136	0.00297357
BnaA07g16440D	1375.81	-3.43377	0.397224	-8.63828	5.70678e-18	2.31148e-16
BnaA07g16550D	68.8825	2.02346	0.381527	5.26863	1.37448e-07	1.55086e-06
BnaA07g16640D	31.5507	3.68329	0.622601	5.23099	1.68602e-07	1.87394e-06
BnaA07g16660D	208.371	-3.16945	0.257371	-12.2516	1.64795e-34	1.8389e-32
BnaA07g16680D	10.535	2.53699	0.749176	3.04384	0.0023358	0.0106056
BnaA07g17010D	15.6651	2.45552	0.673722	3.45199	0.000556478	0.00302858
BnaA07g17130D	84.4026	4.08746	0.454223	8.47447	2.36148e-17	9.04321e-16
BnaA07g17140D	31.1901	2.40479	0.564453	4.16334	3.13624e-05	0.000229959
BnaA07g17490D	8.59531	2.58973	0.773518	2.79899	0.00512623	0.0208434
BnaA07g17600D	9.72507	-3.41205	0.777357	-4.07462	4.60886e-05	0.000326384
BnaA07g17630D	49.3925	-2.33035	0.44259	-5.22513	1.74035e-07	1.9305e-06
BnaA07g17640D	29.7646	-3.68591	0.591624	-5.73475	9.76582e-09	1.32702e-07
BnaA07g17690D	16.1675	-4.18858	0.74273	-4.79316	1.64174e-06	1.53996e-05
BnaA07g18140D	15.8264	-4.12119	0.747043	-4.73515	2.18888e-06	2.0154e-05
BnaA07g18280D	36.633	3.15893	0.543538	5.51433	3.5011e-08	4.35689e-07
BnaA07g18580D	98.7761	3.06813	0.363554	8.30367	1.00947e-16	3.63964e-15
BnaA07g18590D	30.4643	2.40326	0.548085	4.27944	1.87366e-05	0.000143764
BnaA07g19940D	26.9395	-2.51895	0.552882	-4.46707	7.92966e-06	6.56678e-05
BnaA07g20080D	11.9895	3.45979	0.768205	4.09539	4.21462e-05	0.000301038
BnaA07g20110D	12.0426	-2.11216	0.693527	-2.97066	0.00297161	0.0130585
BnaA07g20370D	170.884	-2.68608	0.269339	-9.9372	2.86772e-23	1.74231e-21
BnaA07g20590D	59.6441	-5.74509	0.622635	-5.59994	2.14428e-08	2.76508e-07
BnaA07g20880D	124.777	2.49713	0.311558	7.96309	1.67796e-15	5.43016e-14
BnaA07g21050D	5.61045	2.37008	0.80032	3.01814	0.0025433	0.0114246
BnaA07g21190D	242.795	-7.89652	0.588776	-7.96955	1.59255e-15	5.16037e-14
BnaA07g21310D	37.2013	-3.03476	0.524442	-5.6296	1.80628e-08	2.35689e-07
BnaA07g21910D	14.8873	2.19343	0.67125	3.1429	0.00167283	0.00793319
BnaA07g22110D	38.5592	-5.44561	0.68183	-5.91142	3.39171e-09	4.95944e-08
BnaA07g22550D	4.68476	-2.30584	0.800749	-3.00243	0.00267833	0.0119399
BnaA07g22580D	6.49301	-2.78858	0.796423	-3.47956	0.00050223	0.0027661
BnaA07g22620D	1540.61	-3.82241	0.139213	-27.423	1.45726e-165	4.91088e-162
BnaA07g22770D	13.0291	3.18121	0.743994	3.32072	0.000897859	0.00460163
BnaA07g22790D	8.40227	2.85295	0.791832	3.51771	0.000435295	0.00243843
BnaA07g22860D	10.5802	3.27675	0.775912	3.91954	8.87188e-05	0.000591018
BnaA07g22910D	44.4714	-4.84506	0.597063	-6.52364	6.86202e-11	1.28517e-09
BnaA07g22930D	19.2545	-4.09228	0.70951	-4.19191	2.76616e-05	0.000205025
BnaA07g22990D	33.0184	4.87677	0.700901	5.4057	6.45549e-08	7.7071e-07
BnaA07g23000D	4.25839	2.02584	0.799483	2.65379	0.00795924	0.0303258
BnaA07g23070D	21.441	2.31171	0.606227	3.69556	0.000219406	0.00133335
BnaA07g23140D	44.1079	2.47507	0.493023	4.93131	8.16809e-07	8.10858e-06
BnaA07g23310D	13.7131	-2.30345	0.688267	-3.24843	0.00116042	0.00575926
BnaA07g23370D	40.8345	3.4417	0.544756	5.9177	3.26475e-09	4.78071e-08
BnaA07g23380D	53.6246	-2.6584	0.434201	-6.052	1.43062e-09	2.22375e-08
BnaA07g23850D	3605.89	9.41933	0.345003	23.135	2.05677e-118	2.31039e-115
BnaA07g23880D	22.3329	2.35692	0.613985	3.71968	0.000199472	0.00122397
BnaA07g24380D	6.56788	2.60957	0.79682	3.25858	0.0011197	0.00558135
BnaA07g24600D	348.522	-2.14287	0.20754	-10.3165	5.93369e-25	3.95702e-23
BnaA07g25140D	116.356	-3.39474	0.334592	-10.0198	1.2476e-23	7.73804e-22
BnaA07g25180D	203.225	2.32634	0.250973	9.23965	2.4731e-20	1.19629e-18
BnaA07g25350D	233.876	2.33667	0.242118	9.62431	6.31276e-22	3.46852e-20
BnaA07g25380D	65.201	2.02143	0.417159	4.81366	1.48194e-06	1.40309e-05
BnaA07g25540D	13.1175	-3.17	0.726874	-3.80823	0.000139967	0.000891282
BnaA07g25780D	11.701	-3.32569	0.747955	-3.54179	0.000397426	0.00225392
BnaA07g25960D	21.3662	4.22306	0.734475	4.81691	1.45797e-06	1.3822e-05
BnaA07g25970D	6.55447	2.60522	0.796873	3.25452	0.00113582	0.00565217
BnaA07g25980D	23.2488	-4.72389	0.716525	-5.27594	1.3208e-07	1.49597e-06
BnaA07g26030D	61.2044	2.2231	0.418926	5.25703	1.46402e-07	1.64491e-06
BnaA07g26400D	20.5636	4.22412	0.732438	4.81345	1.48349e-06	1.40429e-05
BnaA07g26750D	16.7127	-3.13871	0.67519	-4.27304	1.92824e-05	0.000147527
BnaA07g26930D	14.7004	-4.04658	0.749496	-4.66331	3.11169e-06	2.7874e-05
BnaA07g27610D	5.5925	-2.58957	0.799534	-3.28042	0.00103652	0.00521446
BnaA07g27660D	31.0373	3.88963	0.635736	5.17561	2.27172e-07	2.47379e-06
BnaA07g27670D	68.0652	3.20226	0.428138	7.27207	3.54022e-13	8.84163e-12
BnaA07g27690D	126.444	2.54301	0.314983	8.01941	1.06255e-15	3.49225e-14
BnaA07g28040D	746.85	-4.67548	0.193426	-24.01	2.18723e-127	3.35037e-124
BnaA07g28050D	46.709	-3.87858	0.513666	-7.10898	1.16905e-12	2.73965e-11
BnaA07g28200D	64.3307	2.22987	0.401722	5.50003	3.79723e-08	4.69996e-07
BnaA07g28360D	304.35	-2.30626	0.210766	-10.9296	8.32349e-28	6.54346e-26
BnaA07g28390D	91.1011	-2.46956	0.36255	-6.77903	1.20981e-11	2.49103e-10
BnaA07g28400D	18.7101	-4.02447	0.711118	-4.14978	3.32797e-05	0.000242575
BnaA07g28430D	16.8074	-2.6188	0.652127	-3.86749	0.000109962	0.000718244
BnaA07g29680D	23.4158	-3.66664	0.647608	-5.05588	4.28412e-07	4.44952e-06
BnaA07g29830D	73.2243	-2.06878	0.360956	-5.71042	1.12695e-08	1.51788e-07
BnaA07g30010D	21.244	-2.19658	0.632751	-3.41541	0.000636851	0.00340766
BnaA07g30590D	25.3656	2.11239	0.5672	3.6506	0.000261631	0.00155774
BnaA07g30790D	263.147	-3.33775	0.251233	-13.2213	6.60964e-40	9.33269e-38
BnaA07g31230D	169.439	-2.92317	0.271712	-10.7065	9.48906e-27	7.0435e-25
BnaA07g31250D	41.2586	3.46177	0.542551	5.97061	2.36368e-09	3.53391e-08
BnaA07g31260D	11.5199	-2.0085	0.702478	-2.80067	0.00509962	0.0207553
BnaA07g31270D	236.579	-3.64217	0.256064	-14.1135	3.13698e-45	5.62309e-43
BnaA07g31420D	596.335	-3.27427	0.175062	-18.6677	9.07583e-78	4.36928e-75
BnaA07g31970D	17.6867	-2.66076	0.65223	-3.93178	8.43206e-05	0.000564621
BnaA07g32090D	580.368	2.4848	0.175988	14.1012	3.73545e-45	6.60221e-43
BnaA07g32120D	642.271	2.19362	0.167509	13.085	4.00896e-39	5.477e-37
BnaA07g32130D	18.2175	-2.3497	0.657652	-3.50225	0.000461344	0.00256382
BnaA07g32150D	687.229	-4.45745	0.190069	-23.313	3.27137e-120	3.93725e-117
BnaA07g32400D	79.6981	2.76169	0.394222	6.90819	4.90865e-12	1.06767e-10
BnaA07g32410D	69.2334	-2.89564	0.394334	-7.25595	3.98859e-13	9.89784e-12
BnaA07g32570D	1008.19	-9.50259	0.514443	-8.66376	4.56466e-18	1.8623e-16
BnaA07g32640D	7.8237	2.11487	0.772355	2.54181	0.0110281	0.0397588
BnaA07g32990D	179.059	2.0703	0.280753	7.35517	1.90691e-13	4.94066e-12
BnaA07g33170D	12.1515	3.42278	0.771003	4.0661	4.78058e-05	0.000337458
BnaA07g33510D	219.954	2.92966	0.295041	9.87465	5.36195e-23	3.2038e-21
BnaA07g33650D	25.2815	2.07133	0.587035	3.46493	0.000530378	0.00290121
BnaA07g33660D	12.1193	2.4681	0.728755	3.13828	0.00169941	0.00804337
BnaA07g34990D	37.1748	-2.07376	0.475365	-4.33045	1.48808e-05	0.000116207
BnaA07g35120D	559.471	7.90581	0.490449	10.9479	6.79819e-28	5.36102e-26
BnaA07g35150D	84.0241	5.14826	0.53878	7.78349	7.05498e-15	2.13418e-13
BnaA07g35160D	93.4015	5.96469	0.606385	5.64839	1.61954e-08	2.12473e-07
BnaA07g35230D	24.8817	3.33083	0.644231	4.65488	3.24172e-06	2.89311e-05
BnaA07g35400D	5.50572	-2.16172	0.796518	-2.50251	0.0123315	0.0436438
BnaA07g35410D	31.8484	-3.79853	0.586538	-5.931	3.01093e-09	4.42955e-08
BnaA07g35560D	12.6377	-3.81785	0.760104	-4.45266	8.48138e-06	6.98819e-05
BnaA07g35570D	5.58528	-2.58845	0.799546	-3.27918	0.00104109	0.00523225
BnaA07g35580D	88.0812	-3.23515	0.367033	-8.6923	3.55181e-18	1.46325e-16
BnaA07g35600D	112.965	-3.55219	0.347548	-10.0646	7.92291e-24	4.96892e-22
BnaA07g35640D	178.461	-6.47457	0.482733	-10.7505	5.89725e-27	4.4163e-25
BnaA07g35650D	67.3155	-3.6713	0.437404	-8.13779	4.02543e-16	1.37767e-14
BnaA07g35670D	139.386	-5.98264	0.47687	-10.5263	6.5342e-26	4.60665e-24
BnaA07g35690D	21.0122	-4.22062	0.702593	-4.30271	1.68718e-05	0.000130546
BnaA07g35730D	217.399	-6.24284	0.422247	-12.9347	2.86807e-38	3.8052e-36
BnaA07g35740D	146.724	-3.62786	0.309231	-11.5829	5.03209e-31	4.69312e-29
BnaA07g35780D	102.177	-6.48253	0.594003	-6.21191	5.23428e-10	8.675e-09
BnaA07g35800D	53.5573	-5.90231	0.661163	-6.30524	2.87748e-10	4.93398e-09
BnaA07g35830D	144.717	-6.95476	0.578643	-6.59644	4.21136e-11	8.08814e-10
BnaA07g35850D	116.723	-6.42841	0.560722	-7.6682	1.74425e-14	5.09653e-13
BnaA07g35860D	10.335	-3.4744	0.77544	-4.13715	3.51641e-05	0.000255023
BnaA07g35870D	3.80592	-2.02115	0.796812	-2.71018	0.00672467	0.0262836
BnaA07g35880D	8.8679	-3.22285	0.7849	-3.90244	9.52288e-05	0.000630316
BnaA07g35900D	41.7407	-5.55814	0.676557	-6.0089	1.86785e-09	2.83709e-08
BnaA07g35920D	39.9902	-5.49933	0.679208	-5.95787	2.55554e-09	3.80277e-08
BnaA07g35930D	12.3544	-3.78471	0.761559	-4.42183	9.78671e-06	7.98045e-05
BnaA08g00110D	24.0095	4.4234	0.723357	4.99743	5.81008e-07	5.9034e-06
BnaA08g00220D	150.414	3.02282	0.304265	9.8371	7.79218e-23	4.59075e-21
BnaA08g00260D	126.792	2.77449	0.319134	8.6172	6.86135e-18	2.76582e-16
BnaA08g00340D	4.64941	2.13283	0.800558	2.76866	0.0056287	0.0226137
BnaA08g00700D	13.7899	3.65789	0.75955	4.28423	1.83377e-05	0.000140981
BnaA08g00830D	45.433	5.28052	0.683604	5.76535	8.14866e-09	1.12297e-07
BnaA08g00950D	107.07	-3.18359	0.348319	-9.04606	1.48215e-19	6.7802e-18
BnaA08g01080D	46.8684	3.79305	0.54074	6.4407	1.18925e-10	2.14698e-09
BnaA08g01410D	23.7822	2.224	0.585628	3.70447	0.000211831	0.00129244
BnaA08g01480D	14.7437	-4.03121	0.75076	-4.65124	3.29946e-06	2.94101e-05
BnaA08g01610D	18.9771	3.15053	0.682809	4.09688	4.18759e-05	0.000299277
BnaA08g01710D	91.2693	-3.45364	0.389876	-8.70852	3.07856e-18	1.27243e-16
BnaA08g01720D	5.88695	2.41545	0.79996	3.0683	0.00215278	0.00987433
BnaA08g01740D	10.0217	2.77146	0.766401	2.9664	0.00301305	0.0132093
BnaA08g01910D	49.4048	3.36815	0.511872	6.27351	3.53006e-10	5.97592e-09
BnaA08g02020D	10.2903	3.21825	0.778548	3.86505	0.000111067	0.000724432
BnaA08g02680D	94.8202	-3.85444	0.383861	-9.78001	1.372e-22	7.94424e-21
BnaA08g02770D	16.0804	3.49629	0.726298	3.59159	0.000328667	0.00190809
BnaA08g03040D	10.9359	2.6186	0.742348	3.1406	0.00168605	0.00798912
BnaA08g03050D	3267.16	-2.56346	0.131702	-19.4617	2.32135e-84	1.33343e-81
BnaA08g03160D	456.397	-8.46044	0.537492	-7.82714	4.99105e-15	1.53369e-13
BnaA08g03380D	10.6114	-2.65962	0.733867	-3.35948	0.000780895	0.00406985
BnaA08g03900D	37.3757	-4.59055	0.610363	-6.14624	7.93404e-10	1.28338e-08
BnaA08g04080D	573.848	3.17625	0.207344	15.2775	1.07944e-52	2.59833e-50
BnaA08g04260D	14.1334	2.48234	0.699419	3.3298	0.000869091	0.00446869
BnaA08g04320D	37.7763	4.39233	0.644582	5.26195	1.42535e-07	1.6054e-06
BnaA08g04330D	21.1178	3.55663	0.689309	4.25976	2.04647e-05	0.0001557
BnaA08g04350D	72.2763	4.44824	0.503983	7.91276	2.51748e-15	7.97845e-14
BnaA08g04520D	204.526	-2.37545	0.242304	-9.78434	1.31451e-22	7.62011e-21
BnaA08g04730D	52.4785	4.44994	0.57544	6.55061	5.73038e-11	1.08286e-09
BnaA08g04740D	4.41589	-2.24981	0.800462	-2.93989	0.00328329	0.0142339
BnaA08g04960D	30.0396	-5.08785	0.699009	-5.59889	2.15731e-08	2.77905e-07
BnaA08g05030D	10.8079	-2.23367	0.720731	-2.99786	0.00271879	0.0120925
BnaA08g05350D	27.2508	-3.41074	0.600783	-5.32147	1.02934e-07	1.18605e-06
BnaA08g05840D	47.3217	3.28749	0.522794	6.01112	1.84244e-09	2.80569e-08
BnaA08g06170D	359.451	-2.048	0.197216	-10.3776	3.13649e-25	2.12814e-23
BnaA08g06420D	18.7604	-3.32925	0.665202	-4.54941	5.37958e-06	4.59578e-05
BnaA08g06730D	45.7461	5.32332	0.679962	5.80077	6.60121e-09	9.23102e-08
BnaA08g06750D	26.2885	4.56863	0.715555	5.12801	2.92827e-07	3.13737e-06
BnaA08g06880D	26.2573	-2.53144	0.562413	-4.4119	1.02468e-05	8.31537e-05
BnaA08g06940D	89.9014	3.62316	0.410481	8.53687	1.37912e-17	5.38742e-16
BnaA08g06970D	15.0493	-2.62844	0.672399	-3.73826	0.000185299	0.00114591
BnaA08g07390D	17.6636	-4.31802	0.736521	-4.91106	9.05855e-07	8.91899e-06
BnaA08g07410D	4.43756	-2.20839	0.800002	-2.90806	0.00363674	0.0155396
BnaA08g07440D	73.8682	-3.1014	0.391825	-7.80415	5.99049e-15	1.82638e-13
BnaA08g07510D	682.258	-2.04861	0.581711	-3.52402	0.00042505	0.00238821
BnaA08g07530D	4.88206	2.20265	0.800863	2.84086	0.00449924	0.0186527
BnaA08g07580D	1053.08	-4.48122	0.166494	-26.8135	2.24949e-158	5.9847e-155
BnaA08g07820D	49.3381	3.49082	0.509068	6.48424	8.91798e-11	1.64284e-09
BnaA08g07850D	4.636	2.14171	0.80065	2.77544	0.00551267	0.0222005
BnaA08g08090D	7.63788	2.38932	0.783051	2.62453	0.00867696	0.0325549
BnaA08g08140D	71.9335	4.90895	0.552788	7.34316	2.08607e-13	5.37183e-12
BnaA08g08170D	241.499	2.48333	0.250602	9.87834	5.16807e-23	3.0916e-21
BnaA08g08410D	144.057	-4.51905	0.358275	-12.1848	3.74541e-34	4.08913e-32
BnaA08g08640D	84.0296	-3.14715	0.371361	-8.36429	6.04755e-17	2.22974e-15
BnaA08g08650D	23.416	-4.40583	0.69064	-4.45906	8.232e-06	6.80601e-05
BnaA08g08670D	9.63257	3.10903	0.783102	3.76014	0.00016982	0.00106057
BnaA08g08690D	78.3424	-3.18714	0.388749	-8.07923	6.5175e-16	2.18181e-14
BnaA08g08750D	325.628	7.85864	0.587606	7.94108	2.00429e-15	6.44087e-14
BnaA08g09060D	114.191	2.79674	0.332433	8.32794	8.22636e-17	3.00241e-15
BnaA08g09800D	7.52892	2.77538	0.79311	3.42915	0.000605466	0.0032637
BnaA08g10000D	58.4891	-5.25139	0.57848	-7.10636	1.19139e-12	2.78813e-11
BnaA08g10630D	38.6542	3.1175	0.530934	5.60228	2.11551e-08	2.72937e-07
BnaA08g10670D	1307.97	-2.04625	0.495291	-4.13169	3.60098e-05	0.00026067
BnaA08g10690D	105.626	5.46323	0.528753	8.29734	1.06473e-16	3.83067e-15
BnaA08g10710D	132.565	2.04474	0.310486	6.56335	5.26106e-11	9.97529e-10
BnaA08g10840D	77.2841	5.66913	0.622501	5.41202	6.23177e-08	7.45586e-07
BnaA08g10900D	283.699	3.4169	0.791931	5.02778	4.96182e-07	5.11241e-06
BnaA08g11100D	79.8014	2.02357	0.365368	5.5075	3.63956e-08	4.51586e-07
BnaA08g11110D	90.9727	2.76396	0.361244	7.55665	4.13587e-14	1.14933e-12
BnaA08g11290D	23.2135	2.43651	0.599192	3.92983	8.50044e-05	0.000568522
BnaA08g11310D	3.82036	-2.05099	0.797608	-2.73541	0.00623021	0.0246482
BnaA08g11370D	192.72	-2.30995	0.250689	-9.19656	3.69587e-20	1.75916e-18
BnaA08g11380D	88.1558	-2.196	0.34722	-6.30092	2.95877e-10	5.06135e-09
BnaA08g11680D	54.0573	2.44863	0.434537	5.55387	2.79411e-08	3.53276e-07
BnaA08g11870D	37.3465	-5.40354	0.68366	-5.87462	4.23813e-09	6.0879e-08
BnaA08g13350D	35.8958	-2.63297	0.510401	-5.07485	3.87795e-07	4.06947e-06
BnaA08g13480D	39.5005	4.24702	0.614127	5.71062	1.12568e-08	1.51658e-07
BnaA08g13680D	6.9491	2.54471	0.798744	3.21717	0.0012946	0.00634238
BnaA08g13700D	10.3312	2.85324	0.761508	3.03116	0.00243617	0.011004
BnaA08g13860D	104.446	2.75767	0.341823	7.98177	1.44246e-15	4.69814e-14
BnaA08g14280D	46.6341	3.94464	0.550769	6.45957	1.05003e-10	1.91203e-09
BnaA08g14480D	11.2067	-3.61771	0.769226	-4.26871	1.96603e-05	0.00015019
BnaA08g15130D	10.7617	2.06593	0.729195	2.70911	0.00674645	0.0263506
BnaA08g15280D	23.716	-2.07863	0.575529	-3.57292	0.000353018	0.00203289
BnaA08g15380D	16.4677	2.48448	0.68273	3.45341	0.000553542	0.00301585
BnaA08g16050D	7.87735	2.09666	0.774834	2.52015	0.0117303	0.0418962
BnaA08g16350D	5.57083	-2.56956	0.799804	-3.26325	0.00110143	0.00549834
BnaA08g16540D	13.1104	-2.34099	0.696087	-3.25936	0.00111664	0.00556878
BnaA08g16590D	4.10368	-2.13505	0.799125	-2.82535	0.00472295	0.019437
BnaA08g16880D	151.335	6.8872	0.617782	7.13769	9.49119e-13	2.25456e-11
BnaA08g17340D	98.4603	2.15405	0.332016	6.45251	1.10016e-10	1.99326e-09
BnaA08g17660D	3985.91	2.28708	0.153522	14.8956	3.52233e-50	7.67458e-48
BnaA08g17840D	22.0721	-4.25805	0.699343	-4.35183	1.35005e-05	0.000106481
BnaA08g18220D	44.9007	3.35178	0.51669	6.15394	7.5579e-10	1.22686e-08
BnaA08g18480D	28.1169	3.17472	0.601073	4.91067	9.07659e-07	8.935e-06
BnaA08g18790D	60.9274	-2.19894	0.400201	-5.46624	4.59684e-08	5.60863e-07
BnaA08g19510D	31.4956	2.02686	0.518353	3.85404	0.000116183	0.000754486
BnaA08g19610D	75.2851	-2.18492	0.364156	-5.97425	2.31153e-09	3.46414e-08
BnaA08g19680D	16.9161	-3.57045	0.702329	-4.28557	1.82275e-05	0.000140198
BnaA08g19940D	8.6532	2.28262	0.761485	2.74095	0.00612622	0.0243034
BnaA08g20120D	8.14948	-2.75162	0.776569	-3.03749	0.00238559	0.0108055
BnaA08g20150D	5.80348	-2.24628	0.794352	-2.57912	0.00990529	0.0363393
BnaA08g20170D	77.497	4.29752	0.477249	8.27435	1.29162e-16	4.62393e-15
BnaA08g20210D	31.5631	2.46707	0.539793	4.45465	8.40286e-06	6.93366e-05
BnaA08g20360D	10.9524	-2.26728	0.733759	-2.97661	0.00291457	0.0128425
BnaA08g20440D	23.3043	3.24049	0.647009	4.52498	6.04009e-06	5.11082e-05
BnaA08g20520D	8.30603	2.20432	0.766622	2.64928	0.00806623	0.0306771
BnaA08g20550D	19.2184	-4.04729	0.714758	-4.15817	3.20811e-05	0.000234514
BnaA08g20590D	15.0791	-2.40873	0.671089	-3.48407	0.000493855	0.00272413
BnaA08g20780D	19.4068	-4.46032	0.729461	-5.03944	4.66889e-07	4.82929e-06
BnaA08g20900D	23.1331	-4.06133	0.672172	-4.87494	1.08842e-06	1.05764e-05
BnaA08g21240D	45.0915	-2.34457	0.451158	-5.15083	2.5934e-07	2.79637e-06
BnaA08g21350D	173.034	-2.09529	0.253318	-8.25833	1.47728e-16	5.24036e-15
BnaA08g21390D	31.9654	3.94382	0.629524	5.2718	1.35089e-07	1.52663e-06
BnaA08g21410D	41.0874	-5.51814	0.679368	-5.97556	2.29299e-09	3.44297e-08
BnaA08g21520D	68.9011	-2.25636	0.37441	-5.9952	2.03236e-09	3.07034e-08
BnaA08g21530D	15.9141	-2.53345	0.658516	-3.71415	0.00020389	0.00124866
BnaA08g21680D	63.4234	-2.63004	0.398612	-6.5366	6.29346e-11	1.18263e-09
BnaA08g21760D	258.136	-2.0953	0.224967	-9.30393	1.35345e-20	6.68775e-19
BnaA08g21770D	167.818	-7.41504	0.604059	-7.5749	3.59404e-14	1.00595e-12
BnaA08g21880D	460.667	-5.84479	0.280675	-20.0486	2.07625e-89	1.34554e-86
BnaA08g21930D	5.11471	2.26857	0.800841	2.90887	0.00362736	0.0155087
BnaA08g21960D	235.32	3.08154	0.261313	11.716	1.05523e-31	1.01602e-29
BnaA08g22050D	9.62106	2.10238	0.753931	2.6424	0.00823201	0.0311957
BnaA08g22200D	167.775	-2.64326	0.274956	-9.5803	9.67626e-22	5.25941e-20
BnaA08g22390D	178.765	-7.50368	0.600731	-7.64733	2.05188e-14	5.93027e-13
BnaA08g22520D	29.6613	2.26221	0.548258	4.04146	5.31201e-05	0.000371136
BnaA08g23220D	7.48833	-2.37148	0.771889	-2.84497	0.00444153	0.0184376
BnaA08g23230D	21.6088	-2.31442	0.591523	-3.84277	0.000121653	0.000786471
BnaA08g23520D	270.149	-2.57312	0.218535	-11.7519	6.90642e-32	6.68798e-30
BnaA08g23720D	40.7751	-3.27765	0.50873	-6.22822	4.71758e-10	7.87806e-09
BnaA08g23730D	111.215	-3.48367	0.3454	-9.94109	2.75806e-23	1.68175e-21
BnaA08g23740D	169.322	-3.60939	0.296747	-12.0352	2.32123e-33	2.4243e-31
BnaA08g23820D	65.0953	-2.19	0.384601	-5.66571	1.46419e-08	1.9355e-07
BnaA08g23840D	51.3407	-2.37298	0.469642	-5.01664	5.25843e-07	5.38509e-06
BnaA08g23870D	9.45226	2.40972	0.754532	2.89134	0.00383601	0.0162442
BnaA08g24030D	416.84	2.03083	0.191505	10.5936	3.19029e-26	2.3038e-24
BnaA08g24700D	829.634	-2.97546	0.183173	-16.2298	3.10557e-59	9.51414e-57
BnaA08g24820D	39.883	-2.91143	0.492374	-5.78589	7.21297e-09	1.00388e-07
BnaA08g24900D	70.7898	-2.44975	0.377941	-6.43967	1.1973e-10	2.16074e-09
BnaA08g24920D	953.398	4.17147	0.20041	20.7232	2.13824e-95	1.5895e-92
BnaA08g24930D	140	4.34158	0.396336	10.4778	1.09242e-25	7.62719e-24
BnaA08g24940D	10.8714	2.56837	0.749288	3.07539	0.00210224	0.00968446
BnaA08g25370D	10.4586	-2.39565	0.739945	-3.08107	0.00206256	0.00952931
BnaA08g25470D	363.111	-4.86328	0.255763	-18.6714	8.46705e-78	4.11539e-75
BnaA08g25700D	15.8405	-3.05072	0.687196	-4.09747	4.17686e-05	0.000298552
BnaA08g25920D	43.8152	4.18429	0.588262	6.11195	9.84212e-10	1.56943e-08
BnaA08g25980D	27.68	-2.05318	0.544827	-3.73094	0.000190764	0.00117554
BnaA08g26050D	34.6819	-2.03042	0.503632	-4.00056	6.31918e-05	0.00043507
BnaA08g26170D	39.6213	2.11295	0.481684	4.33072	1.48622e-05	0.00011608
BnaA08g26270D	428.552	-3.32768	0.200622	-16.5395	1.90596e-61	6.29703e-59
BnaA08g26450D	15.6048	2.25256	0.672432	3.21837	0.00128923	0.00632039
BnaA08g26940D	401.829	-2.0903	0.184519	-11.3209	1.03347e-29	9.06962e-28
BnaA08g27130D	24.1896	2.36657	0.589689	3.8963	9.76733e-05	0.000645397
BnaA08g27190D	92.4629	2.1909	0.34084	6.38895	1.67027e-10	2.95004e-09
BnaA08g28590D	87.7678	5.88102	0.609461	5.58015	2.40316e-08	3.06915e-07
BnaA09g00010D	48.98	4.32755	0.584941	6.32212	2.58007e-10	4.4421e-09
BnaA09g00050D	381.108	7.59206	0.522967	9.01184	2.02625e-19	9.16145e-18
BnaA09g00060D	237.974	6.97242	0.53757	8.31458	9.20772e-17	3.34369e-15
BnaA09g00070D	946.298	8.17578	0.426411	14.9354	1.93788e-50	4.31532e-48
BnaA09g00080D	156.1	6.6481	0.582534	6.20162	5.58848e-10	9.23177e-09
BnaA09g00120D	59.4044	5.66914	0.664906	6.10244	1.04465e-09	1.66108e-08
BnaA09g00140D	178.431	6.82402	0.576845	6.34366	2.24364e-10	3.88936e-09
BnaA09g00150D	1243.43	7.57322	0.324816	21.1339	3.88179e-99	3.32578e-96
BnaA09g00170D	190.106	6.90745	0.574379	6.41044	1.451e-10	2.59359e-09
BnaA09g00180D	287.046	6.85066	0.486562	10.6066	2.77544e-26	2.00709e-24
BnaA09g00190D	182.947	7.12064	0.610696	7.33297	2.25111e-13	5.77914e-12
BnaA09g00200D	20.1251	4.18829	0.734553	4.78066	1.74719e-06	1.631e-05
BnaA09g00210D	42.5426	5.18011	0.689203	5.67755	1.36642e-08	1.81574e-07
BnaA09g00220D	201.777	7.24186	0.607054	7.43389	1.0545e-13	2.81734e-12
BnaA09g00250D	569.439	5.50777	0.68648	7.8352	4.68079e-15	1.4445e-13
BnaA09g00260D	34.0141	4.5704	0.668558	4.5005	6.77953e-06	5.68795e-05
BnaA09g00280D	763.664	8.70515	0.529819	7.84285	4.40428e-15	1.36166e-13
BnaA09g00290D	124.444	6.62936	0.62722	6.92194	4.45502e-12	9.7657e-11
BnaA09g00310D	31.592	4.82157	0.703368	5.35591	8.51258e-08	9.94919e-07
BnaA09g00320D	423.356	7.52638	0.498998	10.4211	1.98561e-25	1.36188e-23
BnaA09g00340D	27.4114	2.82791	0.587312	4.591	4.41117e-06	3.83261e-05
BnaA09g00350D	15.0316	3.39222	0.732775	3.50298	0.000460081	0.00255877
BnaA09g00370D	227.491	6.90259	0.541065	8.22858	1.89451e-16	6.65037e-15
BnaA09g00380D	61.9233	5.72248	0.662604	6.14872	7.81105e-10	1.2643e-08
BnaA09g00390D	6855.1	9.22802	0.261207	33.1196	1.54992e-240	1.95867e-236
BnaA09g00400D	19.2694	3.76651	0.711356	3.82043	0.00013322	0.000852315
BnaA09g00410D	5.02701	2.22713	0.800887	2.86918	0.00411538	0.017256
BnaA09g00480D	34.2559	4.90714	0.700391	5.43416	5.50558e-08	6.63888e-07
BnaA09g00610D	108.588	-2.95918	0.334222	-8.78445	1.57129e-18	6.67453e-17
BnaA09g00720D	298.196	2.39158	0.236272	10.0997	5.5435e-24	3.51592e-22
BnaA09g00760D	8.9955	3.05453	0.78417	3.7017	0.000214162	0.0013043
BnaA09g00770D	7.38035	2.72565	0.794714	3.38241	0.000718518	0.00378258
BnaA09g00790D	281.476	6.66636	0.469164	11.2291	2.93571e-29	2.51095e-27
BnaA09g00800D	163.882	6.47497	0.551704	7.74437	9.60587e-15	2.86222e-13
BnaA09g00810D	9.00891	3.04938	0.784542	3.6974	0.00021782	0.00132434
BnaA09g00820D	152.284	4.34848	0.379515	10.999	3.86489e-28	3.09124e-26
BnaA09g00830D	15.7466	3.46001	0.728624	3.56119	0.000369185	0.0021144
BnaA09g00840D	139.188	6.49738	0.58735	6.07978	1.20345e-09	1.89512e-08
BnaA09g00870D	16.919	3.88428	0.750815	4.50371	6.67769e-06	5.60715e-05
BnaA09g00880D	34.0707	3.82685	0.606119	5.52181	3.35522e-08	4.19394e-07
BnaA09g00890D	149.721	5.36638	0.45477	10.4102	2.22703e-25	1.52127e-23
BnaA09g00900D	166.056	5.52153	0.446193	10.8521	1.95e-27	1.49803e-25
BnaA09g00910D	312.632	7.55003	0.556782	6.92626	4.3212e-12	9.48057e-11
BnaA09g00920D	8.48635	2.97213	0.787007	3.62046	0.000294077	0.00172893
BnaA09g00940D	117.228	6.55871	0.629434	6.86204	6.78864e-12	1.45345e-10
BnaA09g00950D	72.4463	5.92472	0.65442	6.32329	2.56046e-10	4.41285e-09
BnaA09g00960D	156.072	6.92662	0.616444	7.17062	7.46604e-13	1.79458e-11
BnaA09g00970D	155.469	6.17765	0.532858	8.53618	1.38733e-17	5.4153e-16
BnaA09g00980D	101.194	6.07336	0.60211	5.73656	9.66207e-09	1.31434e-07
BnaA09g01000D	4.76754	2.15014	0.800661	2.78987	0.00527294	0.0213695
BnaA09g01010D	38.9151	5.10348	0.690192	5.60709	2.05751e-08	2.66407e-07
BnaA09g01030D	138.673	6.24963	0.558757	7.4842	7.19833e-14	1.95104e-12
BnaA09g01040D	1603.32	9.87313	0.538819	9.56401	1.13285e-21	6.13112e-20
BnaA09g01070D	30.2953	4.39095	0.678997	4.35235	1.34687e-05	0.000106296
BnaA09g01080D	2955.43	6.6646	0.21369	30.7388	1.7252e-207	1.45345e-203
BnaA09g01120D	54.3244	5.22043	0.637937	5.03906	4.67824e-07	4.83798e-06
BnaA09g01140D	103.236	6.39473	0.635464	6.72349	1.77422e-11	3.56885e-10
BnaA09g01150D	58.4178	5.06033	0.60495	6.08217	1.18567e-09	1.87119e-08
BnaA09g01190D	24.694	4.43715	0.723718	5.01189	5.38991e-07	5.5097e-06
BnaA09g01200D	40.6887	5.16521	0.687226	5.66159	1.49973e-08	1.97988e-07
BnaA09g01210D	18.2773	4.00364	0.745322	4.6135	3.95947e-06	3.47659e-05
BnaA09g01220D	109.821	6.47341	0.632587	6.79012	1.12042e-11	2.31734e-10
BnaA09g01230D	56.5017	5.60374	0.667565	6.04565	1.48806e-09	2.30594e-08
BnaA09g01240D	155.25	5.42534	0.449323	10.6195	2.4182e-26	1.75629e-24
BnaA09g01250D	83.1655	5.53499	0.587165	6.64014	3.1338e-11	6.11859e-10
BnaA09g01290D	23.2281	4.03147	0.696845	4.0473	5.18109e-05	0.000363043
BnaA09g01310D	17.3941	3.99043	0.743789	4.59665	4.29339e-06	3.73862e-05
BnaA09g01320D	17.9435	3.98987	0.74553	4.59965	4.23209e-06	3.68905e-05
BnaA09g01330D	28.9354	4.69076	0.71003	5.23912	1.61345e-07	1.79921e-06
BnaA09g01380D	77.4539	5.4535	0.58807	6.54968	5.7662e-11	1.08922e-09
BnaA09g01390D	190.784	6.90633	0.574926	6.41023	1.45299e-10	2.59623e-09
BnaA09g01430D	37.3176	4.71002	0.661234	4.61489	3.93296e-06	3.45632e-05
BnaA09g01440D	264.941	6.91804	0.509787	9.60193	7.84622e-22	4.28777e-20
BnaA09g01470D	971.683	6.55321	0.274796	22.7016	4.32295e-114	4.64938e-111
BnaA09g01490D	40.47	4.822	0.655932	4.70827	2.4983e-06	2.27707e-05
BnaA09g01530D	49.0555	4.7992	0.61878	5.76865	7.99085e-09	1.10333e-07
BnaA09g01540D	43.5718	5.23355	0.685235	5.72344	1.04391e-08	1.41244e-07
BnaA09g01550D	628.528	8.69294	0.56524	8.61885	6.76306e-18	2.72838e-16
BnaA09g01560D	166.338	6.09748	0.507489	9.36107	7.89327e-21	3.99396e-19
BnaA09g01570D	235.298	6.75732	0.51391	9.37694	6.7915e-21	3.46072e-19
BnaA09g01580D	14.9227	3.76156	0.755079	4.38299	1.1706e-05	9.36629e-05
BnaA09g01600D	73.5608	5.38045	0.590761	6.46714	9.98769e-11	1.82904e-09
BnaA09g01610D	255.369	6.86435	0.511732	9.52342	1.67575e-21	8.9543e-20
BnaA09g01630D	227.861	6.90431	0.541186	8.22904	1.88722e-16	6.6294e-15
BnaA09g01640D	286.458	7.02291	0.507336	9.74751	1.89044e-22	1.08714e-20
BnaA09g01660D	14.4306	3.72647	0.75619	4.34893	1.36803e-05	0.000107714
BnaA09g01710D	19.0744	3.74184	0.712847	3.80199	0.000143536	0.000911393
BnaA09g01770D	63.5179	5.75944	0.660927	6.18044	6.39231e-10	1.04741e-08
BnaA09g01880D	24.6891	3.81375	0.670514	4.58202	4.60497e-06	3.98386e-05
BnaA09g01890D	86.4482	6.16271	0.644549	6.52649	6.73277e-11	1.26284e-09
BnaA09g01900D	74.0187	4.08907	0.481791	7.91373	2.49786e-15	7.93117e-14
BnaA09g01910D	112.762	5.39188	0.505335	8.872	7.18453e-19	3.13349e-17
BnaA09g01920D	412.484	3.05293	0.204207	14.8975	3.41985e-50	7.48356e-48
BnaA09g01970D	19.6768	4.16379	0.735335	4.75765	1.95859e-06	1.8176e-05
BnaA09g01980D	483.97	7.90617	0.516021	9.36434	7.65241e-21	3.88375e-19
BnaA09g02000D	95.5252	6.28289	0.640384	6.62938	3.37107e-11	6.56663e-10
BnaA09g02010D	17.1749	3.95981	0.745781	4.56903	4.89998e-06	4.21957e-05
BnaA09g02020D	21.8548	4.30772	0.728551	4.89029	1.00688e-06	9.84084e-06
BnaA09g02060D	101.614	6.36334	0.637302	6.69762	2.11844e-11	4.21762e-10
BnaA09g02070D	26.9597	4.58493	0.715493	5.14413	2.68761e-07	2.89055e-06
BnaA09g02100D	11.8713	2.23537	0.714123	2.96735	0.00300383	0.0131818
BnaA09g02110D	37.3753	2.31313	0.797714	3.77775	0.000158249	0.000997046
BnaA09g02120D	2690.05	7.088	0.228	30.3221	5.86337e-202	4.2341e-198
BnaA09g02190D	21.697	3.93526	0.702155	3.96425	7.36284e-05	0.000499107
BnaA09g02200D	101.26	5.41164	0.528628	8.22966	1.87738e-16	6.60403e-15
BnaA09g02220D	125.562	6.63587	0.627513	6.92783	4.27358e-12	9.38833e-11
BnaA09g02230D	25.6953	4.51812	0.718741	5.08358	3.70381e-07	3.89887e-06
BnaA09g02240D	22.5533	3.99395	0.698826	4.01366	5.97837e-05	0.00041369
BnaA09g02260D	259.885	5.93295	0.410056	12.8495	8.65422e-38	1.11883e-35
BnaA09g02410D	69.2166	-3.07278	0.747513	-4.13751	3.51095e-05	0.000254664
BnaA09g02440D	124.829	6.32298	0.596263	5.9425	2.80703e-09	4.1477e-08
BnaA09g02480D	446.801	2.85227	0.194051	14.6605	1.15402e-48	2.36172e-46
BnaA09g02500D	16.1466	-2.17964	0.645465	-3.30857	0.00093773	0.0047774
BnaA09g02960D	34.3977	-5.28714	0.68917	-5.77314	7.78073e-09	1.07756e-07
BnaA09g02970D	14.7726	-3.99254	0.753676	-4.62022	3.83329e-06	3.37342e-05
BnaA09g03050D	75.9461	-2.7332	0.373647	-7.25099	4.13736e-13	1.02469e-11
BnaA09g03080D	10.6256	-3.52445	0.773307	-4.18306	2.87611e-05	0.000212364
BnaA09g03160D	10.779	-2.24163	0.718366	-3.01585	0.00256257	0.0114969
BnaA09g03250D	13.1662	3.59644	0.762123	4.22555	2.38353e-05	0.000178681
BnaA09g03360D	325.193	-2.44305	0.239564	-10.1857	2.29643e-24	1.49014e-22
BnaA09g03480D	138.279	-2.05658	0.285949	-7.1791	7.01693e-13	1.68985e-11
BnaA09g03490D	91.2497	-2.46145	0.339213	-7.21908	5.23397e-13	1.28122e-11
BnaA09g03550D	54.1422	-3.00953	0.459563	-6.43896	1.20296e-10	2.17018e-09
BnaA09g03590D	614.365	-2.1766	0.161021	-13.511	1.34657e-41	2.00789e-39
BnaA09g03720D	74.0701	-3.88319	0.425658	-8.80264	1.33634e-18	5.70046e-17
BnaA09g04020D	25.4641	-4.23418	0.663093	-5.05779	4.24132e-07	4.41323e-06
BnaA09g04040D	16.8139	-3.36534	0.687703	-4.34196	1.4122e-05	0.000110866
BnaA09g04190D	118.082	-2.19892	0.298194	-7.35381	1.92634e-13	4.98845e-12
BnaA09g04280D	551.901	-5.78173	0.259712	-21.6239	1.06995e-103	9.83365e-101
BnaA09g04380D	55.5984	-3.84358	0.485588	-7.55218	4.2803e-14	1.18621e-12
BnaA09g04430D	39.402	-2.04503	0.517496	-3.92417	8.70302e-05	0.000580581
BnaA09g04500D	1332.48	-2.29611	0.148261	-15.4831	4.51069e-54	1.15157e-51
BnaA09g04520D	58.3725	-2.44894	0.778222	-3.22858	0.00124406	0.00612747
BnaA09g04540D	18.8321	2.21978	0.694751	3.10817	0.0018825	0.00879795
BnaA09g04550D	12.8708	-2.06169	0.680748	-2.96595	0.00301753	0.0132235
BnaA09g04600D	183.567	-2.69308	0.257856	-10.4093	2.24866e-25	1.53398e-23
BnaA09g04900D	78.8549	-4.38175	0.448001	-9.22375	2.86884e-20	1.38111e-18
BnaA09g04910D	40.7268	-2.22164	0.46337	-4.75502	1.98427e-06	1.83975e-05
BnaA09g05050D	110.981	-4.64349	0.403661	-10.9072	1.06486e-27	8.31953e-26
BnaA09g05080D	515.638	-3.52043	0.189066	-18.5652	6.14335e-77	2.87537e-74
BnaA09g05110D	123.572	-2.22011	0.300762	-7.36152	1.81831e-13	4.72808e-12
BnaA09g05160D	41.8787	5.19945	0.685961	5.69208	1.25503e-08	1.6761e-07
BnaA09g05570D	47.0086	-2.34449	0.4453	-5.2192	1.79697e-07	1.98917e-06
BnaA09g06190D	490.215	-2.74946	0.186979	-14.686	7.92387e-49	1.64157e-46
BnaA09g06500D	198.234	4.09173	0.321125	12.4453	1.48385e-35	1.73227e-33
BnaA09g06710D	16.4581	-4.2144	0.74151	-4.81676	1.4591e-06	1.38302e-05
BnaA09g06810D	323.415	-8.02307	0.54674	-7.47113	7.95094e-14	2.14353e-12
BnaA09g06870D	174.871	-2.54369	0.275194	-9.21647	3.0703e-20	1.47249e-18
BnaA09g06880D	1483.95	-3.02568	0.138626	-21.8146	1.68487e-105	1.60695e-102
BnaA09g06970D	5.5925	-2.58957	0.799534	-3.28042	0.00103652	0.00521446
BnaA09g06980D	8.65875	2.55438	0.777733	2.77353	0.0055451	0.0223122
BnaA09g07410D	520.615	-2.52767	0.186837	-13.5171	1.23901e-41	1.85298e-39
BnaA09g07440D	358.785	-2.73577	0.227205	-12.0205	2.77396e-33	2.87928e-31
BnaA09g07610D	128.735	-3.20771	0.314446	-10.1103	4.97243e-24	3.16962e-22
BnaA09g07650D	6.27509	-2.09982	0.787898	-2.51355	0.0119524	0.0425602
BnaA09g07860D	152.467	-2.50802	0.275585	-9.07193	1.16929e-19	5.38308e-18
BnaA09g07940D	65.0016	-2.08861	0.378904	-5.48862	4.05092e-08	4.98588e-07
BnaA09g08040D	57.9162	-4.20348	0.491484	-7.98451	1.41087e-15	4.60413e-14
BnaA09g08100D	254.485	-2.07934	0.261036	-7.9573	1.75841e-15	5.67236e-14
BnaA09g08160D	8.2507	-3.16427	0.786202	-3.83938	0.000123345	0.00079599
BnaA09g08410D	608.285	-3.38178	0.173659	-19.4323	4.11158e-84	2.30929e-81
BnaA09g08450D	63.7871	-2.87169	0.405553	-6.99309	2.68888e-12	6.03286e-11
BnaA09g08470D	55.5249	4.98772	0.608508	5.99463	2.03944e-09	3.08012e-08
BnaA09g08790D	47.755	-2.199	0.466088	-4.68483	2.80196e-06	2.52696e-05
BnaA09g08990D	124.497	-2.02215	0.289703	-6.96591	3.26284e-12	7.24663e-11
BnaA09g09010D	15.4201	-3.40385	0.714323	-4.08466	4.41416e-05	0.000314137
BnaA09g09070D	14.1626	-3.96092	0.754289	-4.58776	4.48034e-06	3.88775e-05
BnaA09g09150D	4.41589	-2.24981	0.800462	-2.93989	0.00328329	0.0142339
BnaA09g09460D	587.054	-2.35557	0.166974	-14.0986	3.87432e-45	6.82379e-43
BnaA09g09590D	54.2727	5.54084	0.671026	5.99151	2.07898e-09	3.13703e-08
BnaA09g09640D	661.804	-2.26377	0.161379	-14.0207	1.16521e-44	1.96991e-42
BnaA09g09830D	1685.65	-2.67654	0.366522	-7.30076	2.86153e-13	7.2396e-12
BnaA09g09840D	4.43378	2.01336	0.799058	2.65415	0.00795088	0.0302962
BnaA09g09920D	101.461	-2.0262	0.333522	-6.06126	1.35058e-09	2.11167e-08
BnaA09g09990D	537.655	-2.79203	0.179138	-15.5674	1.21157e-54	3.27506e-52
BnaA09g10240D	223.069	-3.47348	0.256425	-13.4533	2.94378e-41	4.36379e-39
BnaA09g10250D	10.7063	-2.55322	0.742008	-3.24418	0.0011779	0.0058374
BnaA09g10320D	40.5315	-2.37888	0.487537	-4.83134	1.35619e-06	1.29259e-05
BnaA09g10370D	4.08924	-2.07844	0.797936	-2.77892	0.00545406	0.0219907
BnaA09g10380D	352.444	-3.99484	0.235116	-16.8657	8.05038e-64	2.84572e-61
BnaA09g10460D	8.66493	-2.5912	0.76052	-3.10082	0.00192986	0.00898688
BnaA09g10900D	876.452	-2.25037	0.148024	-15.1973	3.68422e-52	8.70252e-50
BnaA09g10920D	6.79078	-2.84939	0.795169	-3.53972	0.000400557	0.00226917
BnaA09g11000D	13.7564	-3.57544	0.734509	-3.75934	0.000170361	0.00106342
BnaA09g11010D	296.809	-2.11082	0.209081	-10.0863	6.3532e-24	4.01937e-22
BnaA09g11110D	223.857	-2.01698	0.22696	-8.87723	6.85451e-19	2.99472e-17
BnaA09g11150D	29.7057	-5.07906	0.699111	-5.5906	2.26289e-08	2.90174e-07
BnaA09g11160D	30.3013	-5.1071	0.697769	-5.6153	1.9622e-08	2.54587e-07
BnaA09g11200D	11.5491	-2.66035	0.736482	-3.38659	0.000707679	0.00373525
BnaA09g11240D	58.7331	-2.62185	0.420351	-6.17773	6.50295e-10	1.06416e-08
BnaA09g11320D	160.489	-2.87701	0.287417	-9.9619	2.23741e-23	1.36758e-21
BnaA09g11620D	1049.79	-3.79819	0.175521	-21.602	1.71971e-103	1.55231e-100
BnaA09g11780D	1107.27	2.42657	0.145748	16.6392	3.62593e-62	1.20583e-59
BnaA09g12300D	2406.37	-3.17278	0.138315	-22.9305	2.30554e-116	2.53354e-113
BnaA09g12610D	31.8858	-3.24738	0.555237	-5.60442	2.08951e-08	2.69996e-07
BnaA09g12840D	4.7371	2.17116	0.800785	2.80623	0.0050125	0.0204391
BnaA09g13160D	13.459	2.60903	0.7193	3.33724	0.00084616	0.00436499
BnaA09g13190D	808.502	-3.67717	0.174034	-21.0843	1.10944e-98	9.19361e-96
BnaA09g13230D	503.651	2.59964	0.215906	12.0216	2.73677e-33	2.8524e-31
BnaA09g13250D	30.3447	4.75903	0.706621	5.30034	1.15586e-07	1.32159e-06
BnaA09g13470D	8.48364	-2.08302	0.748744	-2.68783	0.00719179	0.0278189
BnaA09g13490D	5.0136	2.24738	0.800875	2.88579	0.00390436	0.0164922
BnaA09g13580D	70.4872	2.10099	0.380055	5.48877	4.04753e-08	4.98292e-07
BnaA09g13620D	88.3446	-2.5251	0.346096	-7.25432	4.0369e-13	1.00079e-11
BnaA09g13780D	50.1384	2.3072	0.455496	5.00071	5.71204e-07	5.80961e-06
BnaA09g14060D	6.76189	-2.8721	0.794443	-3.55702	0.000375088	0.00214286
BnaA09g14240D	31.2279	4.8034	0.704394	5.33974	9.30789e-08	1.08013e-06
BnaA09g14510D	276.031	-4.16803	0.260407	-15.8205	2.24526e-56	6.44862e-54
BnaA09g14520D	213.449	-3.28862	0.264896	-12.3443	5.22775e-35	5.93838e-33
BnaA09g14730D	21.0854	-2.85475	0.615483	-4.45176	8.51692e-06	7.01518e-05
BnaA09g15300D	59.0919	-4.45675	0.510657	-7.97407	1.53528e-15	4.99079e-14
BnaA09g15410D	206.112	2.02756	0.246772	8.19865	2.43098e-16	8.44562e-15
BnaA09g15690D	108.875	3.85802	0.389143	9.56936	1.07575e-21	5.82828e-20
BnaA09g15740D	78.6007	4.57121	0.499197	8.17563	2.94321e-16	1.01554e-14
BnaA09g15810D	58.3846	-2.05475	0.395419	-5.17282	2.30592e-07	2.50833e-06
BnaA09g16330D	6.72577	-2.79998	0.796459	-3.49766	0.000469351	0.00260487
BnaA09g16840D	8.64534	2.59194	0.774302	2.80038	0.00510417	0.0207671
BnaA09g16930D	85.0274	3.34897	0.402392	8.10854	5.12328e-16	1.72997e-14
BnaA09g17030D	6.98009	-2.52346	0.785493	-2.83136	0.0046351	0.0191218
BnaA09g17110D	94.541	2.77473	0.365651	7.49865	6.44785e-14	1.75138e-12
BnaA09g17130D	81.4795	2.94759	0.392295	7.38599	1.51328e-13	3.96758e-12
BnaA09g17440D	4.98975	-2.41898	0.800817	-3.11157	0.00186094	0.00870763
BnaA09g18220D	7.31031	2.35272	0.784121	2.58556	0.00972218	0.0357687
BnaA09g18990D	231.19	2.71772	0.288887	9.36888	7.33049e-21	3.72786e-19
BnaA09g19410D	32.8663	-2.72659	0.531842	-5.02191	5.11592e-07	5.25193e-06
BnaA09g20370D	96.2967	-2.37143	0.352024	-6.70752	1.97953e-11	3.95977e-10
BnaA09g20620D	108.558	-2.2273	0.321341	-6.90947	4.86478e-12	1.06037e-10
BnaA09g21020D	41.8977	2.20557	0.477609	4.55529	5.23132e-06	4.48048e-05
BnaA09g21160D	27.3027	-3.86466	0.627543	-5.46273	4.68868e-08	5.71792e-07
BnaA09g21170D	87.9623	-6.57325	0.633521	-6.87409	6.2388e-12	1.34312e-10
BnaA09g21560D	33.1723	-2.7286	0.52686	-5.07504	3.87412e-07	4.0663e-06
BnaA09g21600D	455.376	-2.35626	0.208658	-11.2831	1.59035e-29	1.38844e-27
BnaA09g21710D	18.4484	3.13426	0.678948	4.09277	4.26243e-05	0.000304109
BnaA09g21910D	6.61172	2.62225	0.796525	3.2709	0.00107206	0.00537031
[truncated: 2,583 more rows]

## Sheet: DEGs_root
gene	baseMean	log2FoldChange	lfcSE	stat	pvalue	padj
[truncated: 2,318 more rows]
