# Supplementary material for: In Silico Identification of the Complex Interplay between Regulatory SNPs, Transcription Factors, and Their Related Genes in Brassica napus L. Using Multi-Omics Data
Source: MDPI journal article supplement (doi:10.3390/ijms22020789), 2021-01-14
Supplement: s1 [file s1 › Suppl_Material/Suppl_TableS2_GO_terms_DEGs.xlsx]

## Sheet: BP_upregDEGs_flower
source	term_name	term_id	adjusted_p_value	negative_log10_of_adjusted_p_value	term_size	query_size	intersection_size	effective_domain_size	intersections
GO:BP	lipid metabolic process	GO:0006629	1.08959e-13	12.9627	1327	5221	168	80927	GSBRNA2T00134621001,GSBRNA2T00081585001,GSBRNA2T00083137001,GSBRNA2T00087508001,GSBRNA2T00112029001,GSBRNA2T00077845001,GSBRNA2T00089961001,GSBRNA2T00085681001,GSBRNA2T00120629001,GSBRNA2T00073200001,GSBRNA2T00130114001,GSBRNA2T00085990001,GSBRNA2T00122174001,GSBRNA2T00122075001,GSBRNA2T00122142001,GSBRNA2T00135613001,GSBRNA2T00135439001,GSBRNA2T00072724001,GSBRNA2T00067218001,GSBRNA2T00156369001…
GO:BP	lipid biosynthetic process	GO:0008610	2.43321e-09	8.61382	679	5221	94	80927	GSBRNA2T00134621001,GSBRNA2T00081585001,GSBRNA2T00083137001,GSBRNA2T00087508001,GSBRNA2T00112029001,GSBRNA2T00089961001,GSBRNA2T00085681001,GSBRNA2T00120629001,GSBRNA2T00130114001,GSBRNA2T00122174001,GSBRNA2T00122142001,GSBRNA2T00135439001,GSBRNA2T00072724001,GSBRNA2T00156369001,GSBRNA2T00156324001,GSBRNA2T00071250001,GSBRNA2T00117959001,GSBRNA2T00064981001,GSBRNA2T00154480001,GSBRNA2T00000330001…
GO:BP	carbohydrate metabolic process	GO:0005975	1.06197e-08	7.97389	2128	5221	217	80927	GSBRNA2T00126555001,GSBRNA2T00126573001,GSBRNA2T00126316001,GSBRNA2T00094600001,GSBRNA2T00111632001,GSBRNA2T00111966001,GSBRNA2T00005842001,GSBRNA2T00077843001,GSBRNA2T00089834001,GSBRNA2T00114269001,GSBRNA2T00068863001,GSBRNA2T00120717001,GSBRNA2T00056362001,GSBRNA2T00087833001,GSBRNA2T00087819001,GSBRNA2T00130716001,GSBRNA2T00131178001,GSBRNA2T00065873001,GSBRNA2T00101433001,GSBRNA2T00101476001…
GO:BP	carboxylic acid biosynthetic process	GO:0046394	1.1919e-07	6.92376	698	5221	90	80927	GSBRNA2T00134408001,GSBRNA2T00134621001,GSBRNA2T00081585001,GSBRNA2T00083137001,GSBRNA2T00087508001,GSBRNA2T00089961001,GSBRNA2T00085681001,GSBRNA2T00120629001,GSBRNA2T00130790001,GSBRNA2T00129743001,GSBRNA2T00130114001,GSBRNA2T00135439001,GSBRNA2T00092701001,GSBRNA2T00079160001,GSBRNA2T00156359001,GSBRNA2T00156324001,GSBRNA2T00117959001,GSBRNA2T00064981001,GSBRNA2T00144509001,GSBRNA2T00154480001…
GO:BP	organic acid biosynthetic process	GO:0016053	1.1919e-07	6.92376	698	5221	90	80927	GSBRNA2T00134408001,GSBRNA2T00134621001,GSBRNA2T00081585001,GSBRNA2T00083137001,GSBRNA2T00087508001,GSBRNA2T00089961001,GSBRNA2T00085681001,GSBRNA2T00120629001,GSBRNA2T00130790001,GSBRNA2T00129743001,GSBRNA2T00130114001,GSBRNA2T00135439001,GSBRNA2T00092701001,GSBRNA2T00079160001,GSBRNA2T00156359001,GSBRNA2T00156324001,GSBRNA2T00117959001,GSBRNA2T00064981001,GSBRNA2T00144509001,GSBRNA2T00154480001…
GO:BP	biological_process	GO:0008150	1.3911e-07	6.85664	30216	5221	2157	80927	GSBRNA2T00076760001,GSBRNA2T00068585001,GSBRNA2T00068605001,GSBRNA2T00134274001,GSBRNA2T00134310001,GSBRNA2T00134579001,GSBRNA2T00134581001,GSBRNA2T00134408001,GSBRNA2T00134537001,GSBRNA2T00134621001,GSBRNA2T00134123001,GSBRNA2T00081585001,GSBRNA2T00081601001,GSBRNA2T00047596001,GSBRNA2T00083129001,GSBRNA2T00083137001,GSBRNA2T00126555001,GSBRNA2T00126266001,GSBRNA2T00126293001,GSBRNA2T00126427001…
GO:BP	cellular lipid metabolic process	GO:0044255	2.56861e-07	6.5903	846	5221	102	80927	GSBRNA2T00134621001,GSBRNA2T00081585001,GSBRNA2T00083137001,GSBRNA2T00087508001,GSBRNA2T00089961001,GSBRNA2T00085681001,GSBRNA2T00120629001,GSBRNA2T00130114001,GSBRNA2T00122075001,GSBRNA2T00122142001,GSBRNA2T00135439001,GSBRNA2T00156369001,GSBRNA2T00156324001,GSBRNA2T00071250001,GSBRNA2T00117959001,GSBRNA2T00064981001,GSBRNA2T00154480001,GSBRNA2T00000330001,GSBRNA2T00035688001,GSBRNA2T00065395001…
GO:BP	monocarboxylic acid biosynthetic process	GO:0072330	4.42122e-07	6.35446	255	5221	44	80927	GSBRNA2T00134621001,GSBRNA2T00081585001,GSBRNA2T00083137001,GSBRNA2T00087508001,GSBRNA2T00089961001,GSBRNA2T00085681001,GSBRNA2T00120629001,GSBRNA2T00129743001,GSBRNA2T00130114001,GSBRNA2T00135439001,GSBRNA2T00156324001,GSBRNA2T00117959001,GSBRNA2T00064981001,GSBRNA2T00154480001,GSBRNA2T00000330001,GSBRNA2T00035688001,GSBRNA2T00065395001,GSBRNA2T00143662001,GSBRNA2T00151256001,GSBRNA2T00049578001…
GO:BP	fatty acid biosynthetic process	GO:0006633	4.42122e-07	6.35446	211	5221	39	80927	GSBRNA2T00134621001,GSBRNA2T00083137001,GSBRNA2T00087508001,GSBRNA2T00089961001,GSBRNA2T00085681001,GSBRNA2T00120629001,GSBRNA2T00130114001,GSBRNA2T00135439001,GSBRNA2T00156324001,GSBRNA2T00117959001,GSBRNA2T00064981001,GSBRNA2T00154480001,GSBRNA2T00000330001,GSBRNA2T00035688001,GSBRNA2T00065395001,GSBRNA2T00143662001,GSBRNA2T00151256001,GSBRNA2T00049578001,GSBRNA2T00002263001,GSBRNA2T00068993001…
GO:BP	small GTPase mediated signal transduction	GO:0007264	6.7436e-07	6.17111	67	5221	20	80927	GSBRNA2T00134581001,GSBRNA2T00054057001,GSBRNA2T00130984001,GSBRNA2T00130922001,GSBRNA2T00080814001,GSBRNA2T00135968001,GSBRNA2T00121796001,GSBRNA2T00016053001,GSBRNA2T00035787001,GSBRNA2T00151306001,GSBRNA2T00100106001,GSBRNA2T00041744001,GSBRNA2T00154295001,GSBRNA2T00109918001,GSBRNA2T00042106001,GSBRNA2T00013098001,GSBRNA2T00025408001,GSBRNA2T00109337001,GSBRNA2T00121396001,GSBRNA2T00121442001
GO:BP	fatty acid metabolic process	GO:0006631	1.72231e-06	5.76389	250	5221	42	80927	GSBRNA2T00134621001,GSBRNA2T00083137001,GSBRNA2T00087508001,GSBRNA2T00089961001,GSBRNA2T00085681001,GSBRNA2T00120629001,GSBRNA2T00130114001,GSBRNA2T00135439001,GSBRNA2T00156324001,GSBRNA2T00117959001,GSBRNA2T00064981001,GSBRNA2T00154480001,GSBRNA2T00000330001,GSBRNA2T00035688001,GSBRNA2T00065395001,GSBRNA2T00143662001,GSBRNA2T00132396001,GSBRNA2T00151256001,GSBRNA2T00049578001,GSBRNA2T00002263001…
GO:BP	cell wall organization or biogenesis	GO:0071554	1.31375e-05	4.88149	784	5221	90	80927	GSBRNA2T00039049001,GSBRNA2T00114269001,GSBRNA2T00120717001,GSBRNA2T00056362001,GSBRNA2T00087833001,GSBRNA2T00079773001,GSBRNA2T00130716001,GSBRNA2T00131164001,GSBRNA2T00101433001,GSBRNA2T00130184001,GSBRNA2T00086453001,GSBRNA2T00009823001,GSBRNA2T00091722001,GSBRNA2T00135421001,GSBRNA2T00156330001,GSBRNA2T00156150001,GSBRNA2T00053984001,GSBRNA2T00001997001,GSBRNA2T00065347001,GSBRNA2T00080685001…
GO:BP	small molecule biosynthetic process	GO:0044283	1.37592e-05	4.86141	879	5221	98	80927	GSBRNA2T00134408001,GSBRNA2T00134621001,GSBRNA2T00081585001,GSBRNA2T00083137001,GSBRNA2T00087508001,GSBRNA2T00089961001,GSBRNA2T00085681001,GSBRNA2T00120629001,GSBRNA2T00130790001,GSBRNA2T00129743001,GSBRNA2T00130114001,GSBRNA2T00135480001,GSBRNA2T00135439001,GSBRNA2T00092701001,GSBRNA2T00000695001,GSBRNA2T00079160001,GSBRNA2T00156359001,GSBRNA2T00156324001,GSBRNA2T00117959001,GSBRNA2T00064981001…
GO:BP	carboxylic acid metabolic process	GO:0019752	4.08517e-05	4.38879	1463	5221	144	80927	GSBRNA2T00134408001,GSBRNA2T00134621001,GSBRNA2T00081585001,GSBRNA2T00083137001,GSBRNA2T00087508001,GSBRNA2T00005823001,GSBRNA2T00089961001,GSBRNA2T00123113001,GSBRNA2T00085681001,GSBRNA2T00120631001,GSBRNA2T00120629001,GSBRNA2T00015904001,GSBRNA2T00110274001,GSBRNA2T00130790001,GSBRNA2T00129743001,GSBRNA2T00130114001,GSBRNA2T00135439001,GSBRNA2T00092701001,GSBRNA2T00074513001,GSBRNA2T00079160001…
GO:BP	cellular polysaccharide biosynthetic process	GO:0033692	6.10278e-05	4.21447	154	5221	28	80927	GSBRNA2T00056362001,GSBRNA2T00130716001,GSBRNA2T00130184001,GSBRNA2T00091722001,GSBRNA2T00001997001,GSBRNA2T00065347001,GSBRNA2T00158181001,GSBRNA2T00038393001,GSBRNA2T00074674001,GSBRNA2T00058612001,GSBRNA2T00070450001,GSBRNA2T00075826001,GSBRNA2T00135036001,GSBRNA2T00134867001,GSBRNA2T00156477001,GSBRNA2T00078672001,GSBRNA2T00051474001,GSBRNA2T00140639001,GSBRNA2T00151945001,GSBRNA2T00112429001…
GO:BP	oxoacid metabolic process	GO:0043436	6.10483e-05	4.21433	1477	5221	144	80927	GSBRNA2T00134408001,GSBRNA2T00134621001,GSBRNA2T00081585001,GSBRNA2T00083137001,GSBRNA2T00087508001,GSBRNA2T00005823001,GSBRNA2T00089961001,GSBRNA2T00123113001,GSBRNA2T00085681001,GSBRNA2T00120631001,GSBRNA2T00120629001,GSBRNA2T00015904001,GSBRNA2T00110274001,GSBRNA2T00130790001,GSBRNA2T00129743001,GSBRNA2T00130114001,GSBRNA2T00135439001,GSBRNA2T00092701001,GSBRNA2T00074513001,GSBRNA2T00079160001…
GO:BP	organic acid metabolic process	GO:0006082	6.67759e-05	4.17538	1481	5221	144	80927	GSBRNA2T00134408001,GSBRNA2T00134621001,GSBRNA2T00081585001,GSBRNA2T00083137001,GSBRNA2T00087508001,GSBRNA2T00005823001,GSBRNA2T00089961001,GSBRNA2T00123113001,GSBRNA2T00085681001,GSBRNA2T00120631001,GSBRNA2T00120629001,GSBRNA2T00015904001,GSBRNA2T00110274001,GSBRNA2T00130790001,GSBRNA2T00129743001,GSBRNA2T00130114001,GSBRNA2T00135439001,GSBRNA2T00092701001,GSBRNA2T00074513001,GSBRNA2T00079160001…
GO:BP	lipid localization	GO:0010876	9.1492e-05	4.03862	214	5221	34	80927	GSBRNA2T00054039001,GSBRNA2T00080801001,GSBRNA2T00108570001,GSBRNA2T00081292001,GSBRNA2T00095239001,GSBRNA2T00000184001,GSBRNA2T00118914001,GSBRNA2T00151290001,GSBRNA2T00099891001,GSBRNA2T00041756001,GSBRNA2T00105361001,GSBRNA2T00085405001,GSBRNA2T00074337001,GSBRNA2T00097124001,GSBRNA2T00033287001,GSBRNA2T00151360001,GSBRNA2T00129290001,GSBRNA2T00091610001,GSBRNA2T00083284001,GSBRNA2T00078620001…
GO:BP	lipid transport	GO:0006869	0.000102475	3.98938	206	5221	33	80927	GSBRNA2T00054039001,GSBRNA2T00080801001,GSBRNA2T00081292001,GSBRNA2T00095239001,GSBRNA2T00000184001,GSBRNA2T00118914001,GSBRNA2T00151290001,GSBRNA2T00099891001,GSBRNA2T00041756001,GSBRNA2T00105361001,GSBRNA2T00085405001,GSBRNA2T00074337001,GSBRNA2T00097124001,GSBRNA2T00033287001,GSBRNA2T00151360001,GSBRNA2T00129290001,GSBRNA2T00091610001,GSBRNA2T00083284001,GSBRNA2T00078620001,GSBRNA2T00078560001…
GO:BP	small molecule metabolic process	GO:0044281	0.000124201	3.90587	2385	5221	212	80927	GSBRNA2T00134408001,GSBRNA2T00134621001,GSBRNA2T00081585001,GSBRNA2T00083137001,GSBRNA2T00087508001,GSBRNA2T00111632001,GSBRNA2T00111966001,GSBRNA2T00005823001,GSBRNA2T00051772001,GSBRNA2T00089961001,GSBRNA2T00089834001,GSBRNA2T00123113001,GSBRNA2T00085681001,GSBRNA2T00120631001,GSBRNA2T00120629001,GSBRNA2T00087819001,GSBRNA2T00015904001,GSBRNA2T00110274001,GSBRNA2T00130790001,GSBRNA2T00129743001…
GO:BP	cell wall organization	GO:0071555	0.000166747	3.77794	666	5221	75	80927	GSBRNA2T00039049001,GSBRNA2T00114269001,GSBRNA2T00120717001,GSBRNA2T00087833001,GSBRNA2T00079773001,GSBRNA2T00131164001,GSBRNA2T00101433001,GSBRNA2T00130184001,GSBRNA2T00086453001,GSBRNA2T00009823001,GSBRNA2T00156330001,GSBRNA2T00156150001,GSBRNA2T00053984001,GSBRNA2T00065347001,GSBRNA2T00080685001,GSBRNA2T00041400001,GSBRNA2T00132262001,GSBRNA2T00151019001,GSBRNA2T00049460001,GSBRNA2T00099897001…
GO:BP	external encapsulating structure organization	GO:0045229	0.000197993	3.70335	670	5221	75	80927	GSBRNA2T00039049001,GSBRNA2T00114269001,GSBRNA2T00120717001,GSBRNA2T00087833001,GSBRNA2T00079773001,GSBRNA2T00131164001,GSBRNA2T00101433001,GSBRNA2T00130184001,GSBRNA2T00086453001,GSBRNA2T00009823001,GSBRNA2T00156330001,GSBRNA2T00156150001,GSBRNA2T00053984001,GSBRNA2T00065347001,GSBRNA2T00080685001,GSBRNA2T00041400001,GSBRNA2T00132262001,GSBRNA2T00151019001,GSBRNA2T00049460001,GSBRNA2T00099897001…
GO:BP	transmembrane transport	GO:0055085	0.000378348	3.42211	2431	5221	212	80927	GSBRNA2T00134274001,GSBRNA2T00047596001,GSBRNA2T00126427001,GSBRNA2T00087520001,GSBRNA2T00112008001,GSBRNA2T00111752001,GSBRNA2T00054046001,GSBRNA2T00082423001,GSBRNA2T00044318001,GSBRNA2T00002503001,GSBRNA2T00074958001,GSBRNA2T00068838001,GSBRNA2T00120550001,GSBRNA2T00075847001,GSBRNA2T00149612001,GSBRNA2T00149541001,GSBRNA2T00087845001,GSBRNA2T00026600001,GSBRNA2T00129752001,GSBRNA2T00067504001…
GO:BP	isoprenoid biosynthetic process	GO:0008299	0.000441095	3.35547	119	5221	22	80927	GSBRNA2T00081585001,GSBRNA2T00122142001,GSBRNA2T00071250001,GSBRNA2T00028864001,GSBRNA2T00012157001,GSBRNA2T00146396001,GSBRNA2T00146397001,GSBRNA2T00153667001,GSBRNA2T00057368001,GSBRNA2T00032808001,GSBRNA2T00115296001,GSBRNA2T00145457001,GSBRNA2T00140556001,GSBRNA2T00079573001,GSBRNA2T00128396001,GSBRNA2T00148041001,GSBRNA2T00148042001,GSBRNA2T00014764001,GSBRNA2T00065537001,GSBRNA2T00068258001…
GO:BP	polysaccharide biosynthetic process	GO:0000271	0.000544567	3.26395	215	5221	32	80927	GSBRNA2T00056362001,GSBRNA2T00130716001,GSBRNA2T00130184001,GSBRNA2T00091722001,GSBRNA2T00001997001,GSBRNA2T00065347001,GSBRNA2T00041400001,GSBRNA2T00158181001,GSBRNA2T00038393001,GSBRNA2T00074674001,GSBRNA2T00058612001,GSBRNA2T00087501001,GSBRNA2T00070450001,GSBRNA2T00075826001,GSBRNA2T00135036001,GSBRNA2T00134867001,GSBRNA2T00156477001,GSBRNA2T00078672001,GSBRNA2T00051474001,GSBRNA2T00072292001…
GO:BP	cellular carbohydrate biosynthetic process	GO:0034637	0.000577348	3.23856	226	5221	33	80927	GSBRNA2T00056362001,GSBRNA2T00130716001,GSBRNA2T00130184001,GSBRNA2T00091722001,GSBRNA2T00001997001,GSBRNA2T00118912001,GSBRNA2T00090182001,GSBRNA2T00065347001,GSBRNA2T00068996001,GSBRNA2T00158181001,GSBRNA2T00038393001,GSBRNA2T00074674001,GSBRNA2T00058612001,GSBRNA2T00070450001,GSBRNA2T00075826001,GSBRNA2T00135036001,GSBRNA2T00134867001,GSBRNA2T00156477001,GSBRNA2T00078672001,GSBRNA2T00051474001…
GO:BP	polysaccharide metabolic process	GO:0005976	0.000632244	3.19911	638	5221	70	80927	GSBRNA2T00094600001,GSBRNA2T00005842001,GSBRNA2T00056362001,GSBRNA2T00130716001,GSBRNA2T00130184001,GSBRNA2T00009823001,GSBRNA2T00091722001,GSBRNA2T00053984001,GSBRNA2T00154463001,GSBRNA2T00001997001,GSBRNA2T00065347001,GSBRNA2T00041400001,GSBRNA2T00151193001,GSBRNA2T00151104001,GSBRNA2T00068962001,GSBRNA2T00095444001,GSBRNA2T00158181001,GSBRNA2T00038393001,GSBRNA2T00012972001,GSBRNA2T00012984001…
GO:BP	cellular carbohydrate metabolic process	GO:0044262	0.000632244	3.19911	453	5221	54	80927	GSBRNA2T00056362001,GSBRNA2T00130716001,GSBRNA2T00130184001,GSBRNA2T00091722001,GSBRNA2T00001997001,GSBRNA2T00118912001,GSBRNA2T00090182001,GSBRNA2T00065347001,GSBRNA2T00093561001,GSBRNA2T00068996001,GSBRNA2T00002805001,GSBRNA2T00158181001,GSBRNA2T00038393001,GSBRNA2T00012920001,GSBRNA2T00074674001,GSBRNA2T00058612001,GSBRNA2T00066233001,GSBRNA2T00070450001,GSBRNA2T00075826001,GSBRNA2T00059432001…
GO:BP	isoprenoid metabolic process	GO:0006720	0.000632244	3.19911	123	5221	22	80927	GSBRNA2T00081585001,GSBRNA2T00122142001,GSBRNA2T00071250001,GSBRNA2T00028864001,GSBRNA2T00012157001,GSBRNA2T00146396001,GSBRNA2T00146397001,GSBRNA2T00153667001,GSBRNA2T00057368001,GSBRNA2T00032808001,GSBRNA2T00115296001,GSBRNA2T00145457001,GSBRNA2T00140556001,GSBRNA2T00079573001,GSBRNA2T00128396001,GSBRNA2T00148041001,GSBRNA2T00148042001,GSBRNA2T00014764001,GSBRNA2T00065537001,GSBRNA2T00068258001…
GO:BP	xylan biosynthetic process	GO:0045492	0.000701854	3.15375	37	5221	11	80927	GSBRNA2T00056362001,GSBRNA2T00130716001,GSBRNA2T00091722001,GSBRNA2T00001997001,GSBRNA2T00038393001,GSBRNA2T00070450001,GSBRNA2T00134867001,GSBRNA2T00156477001,GSBRNA2T00112429001,GSBRNA2T00085525001,GSBRNA2T00121223001
GO:BP	cellular component macromolecule biosynthetic process	GO:0070589	0.000797326	3.09836	38	5221	11	80927	GSBRNA2T00056362001,GSBRNA2T00130716001,GSBRNA2T00091722001,GSBRNA2T00001997001,GSBRNA2T00038393001,GSBRNA2T00070450001,GSBRNA2T00134867001,GSBRNA2T00156477001,GSBRNA2T00112429001,GSBRNA2T00085525001,GSBRNA2T00121223001
GO:BP	xylan metabolic process	GO:0045491	0.000797326	3.09836	38	5221	11	80927	GSBRNA2T00056362001,GSBRNA2T00130716001,GSBRNA2T00091722001,GSBRNA2T00001997001,GSBRNA2T00038393001,GSBRNA2T00070450001,GSBRNA2T00134867001,GSBRNA2T00156477001,GSBRNA2T00112429001,GSBRNA2T00085525001,GSBRNA2T00121223001
GO:BP	monocarboxylic acid metabolic process	GO:0032787	0.000797326	3.09836	506	5221	58	80927	GSBRNA2T00134621001,GSBRNA2T00081585001,GSBRNA2T00083137001,GSBRNA2T00087508001,GSBRNA2T00089961001,GSBRNA2T00085681001,GSBRNA2T00120629001,GSBRNA2T00129743001,GSBRNA2T00130114001,GSBRNA2T00135439001,GSBRNA2T00156324001,GSBRNA2T00117959001,GSBRNA2T00064981001,GSBRNA2T00154480001,GSBRNA2T00000330001,GSBRNA2T00035688001,GSBRNA2T00065395001,GSBRNA2T00093561001,GSBRNA2T00143662001,GSBRNA2T00132396001…
GO:BP	cell wall polysaccharide biosynthetic process	GO:0070592	0.000797326	3.09836	38	5221	11	80927	GSBRNA2T00056362001,GSBRNA2T00130716001,GSBRNA2T00091722001,GSBRNA2T00001997001,GSBRNA2T00038393001,GSBRNA2T00070450001,GSBRNA2T00134867001,GSBRNA2T00156477001,GSBRNA2T00112429001,GSBRNA2T00085525001,GSBRNA2T00121223001
GO:BP	cell wall macromolecule biosynthetic process	GO:0044038	0.000797326	3.09836	38	5221	11	80927	GSBRNA2T00056362001,GSBRNA2T00130716001,GSBRNA2T00091722001,GSBRNA2T00001997001,GSBRNA2T00038393001,GSBRNA2T00070450001,GSBRNA2T00134867001,GSBRNA2T00156477001,GSBRNA2T00112429001,GSBRNA2T00085525001,GSBRNA2T00121223001
GO:BP	oxidation-reduction process	GO:0055114	0.00354761	2.45006	3620	5221	290	80927	GSBRNA2T00076760001,GSBRNA2T00126581001,GSBRNA2T00044812001,GSBRNA2T00111966001,GSBRNA2T00112029001,GSBRNA2T00052894001,GSBRNA2T00089961001,GSBRNA2T00087854001,GSBRNA2T00084346001,GSBRNA2T00090900001,GSBRNA2T00114437001,GSBRNA2T00120751001,GSBRNA2T00085681001,GSBRNA2T00104838001,GSBRNA2T00104963001,GSBRNA2T00068862001,GSBRNA2T00149650001,GSBRNA2T00133979001,GSBRNA2T00133973001,GSBRNA2T00073200001…
GO:BP	cellulose metabolic process	GO:0030243	0.00396474	2.40178	112	5221	19	80927	GSBRNA2T00130184001,GSBRNA2T00065347001,GSBRNA2T00158181001,GSBRNA2T00074674001,GSBRNA2T00058612001,GSBRNA2T00066233001,GSBRNA2T00075826001,GSBRNA2T00078672001,GSBRNA2T00051474001,GSBRNA2T00140639001,GSBRNA2T00048945001,GSBRNA2T00128202001,GSBRNA2T00018784001,GSBRNA2T00146216001,GSBRNA2T00143152001,GSBRNA2T00084195001,GSBRNA2T00076643001,GSBRNA2T00022088001,GSBRNA2T00018415001
GO:BP	localization	GO:0051179	0.00411139	2.38601	4376	5221	343	80927	GSBRNA2T00134274001,GSBRNA2T00134581001,GSBRNA2T00134123001,GSBRNA2T00047596001,GSBRNA2T00126293001,GSBRNA2T00126427001,GSBRNA2T00087520001,GSBRNA2T00111677001,GSBRNA2T00112008001,GSBRNA2T00111752001,GSBRNA2T00054046001,GSBRNA2T00054039001,GSBRNA2T00055327001,GSBRNA2T00082423001,GSBRNA2T00044318001,GSBRNA2T00002503001,GSBRNA2T00074958001,GSBRNA2T00068838001,GSBRNA2T00120550001,GSBRNA2T00075847001…
GO:BP	transport	GO:0006810	0.00470485	2.32745	4315	5221	338	80927	GSBRNA2T00134274001,GSBRNA2T00134581001,GSBRNA2T00134123001,GSBRNA2T00047596001,GSBRNA2T00126293001,GSBRNA2T00126427001,GSBRNA2T00087520001,GSBRNA2T00111677001,GSBRNA2T00112008001,GSBRNA2T00111752001,GSBRNA2T00054046001,GSBRNA2T00054039001,GSBRNA2T00055327001,GSBRNA2T00082423001,GSBRNA2T00044318001,GSBRNA2T00002503001,GSBRNA2T00074958001,GSBRNA2T00068838001,GSBRNA2T00120550001,GSBRNA2T00075847001…
GO:BP	beta-glucan metabolic process	GO:0051273	0.00487267	2.31223	143	5221	22	80927	GSBRNA2T00130184001,GSBRNA2T00065347001,GSBRNA2T00158181001,GSBRNA2T00074674001,GSBRNA2T00058612001,GSBRNA2T00066233001,GSBRNA2T00075826001,GSBRNA2T00135036001,GSBRNA2T00078672001,GSBRNA2T00051474001,GSBRNA2T00140639001,GSBRNA2T00151945001,GSBRNA2T00048945001,GSBRNA2T00128202001,GSBRNA2T00018784001,GSBRNA2T00091303001,GSBRNA2T00146216001,GSBRNA2T00143152001,GSBRNA2T00084195001,GSBRNA2T00076643001…
GO:BP	establishment of localization	GO:0051234	0.00544365	2.26411	4341	5221	339	80927	GSBRNA2T00134274001,GSBRNA2T00134581001,GSBRNA2T00134123001,GSBRNA2T00047596001,GSBRNA2T00126293001,GSBRNA2T00126427001,GSBRNA2T00087520001,GSBRNA2T00111677001,GSBRNA2T00112008001,GSBRNA2T00111752001,GSBRNA2T00054046001,GSBRNA2T00054039001,GSBRNA2T00055327001,GSBRNA2T00082423001,GSBRNA2T00044318001,GSBRNA2T00002503001,GSBRNA2T00074958001,GSBRNA2T00068838001,GSBRNA2T00120550001,GSBRNA2T00075847001…
GO:BP	cellular polysaccharide metabolic process	GO:0044264	0.00639602	2.19409	294	5221	36	80927	GSBRNA2T00056362001,GSBRNA2T00130716001,GSBRNA2T00130184001,GSBRNA2T00091722001,GSBRNA2T00001997001,GSBRNA2T00065347001,GSBRNA2T00158181001,GSBRNA2T00038393001,GSBRNA2T00074674001,GSBRNA2T00058612001,GSBRNA2T00066233001,GSBRNA2T00070450001,GSBRNA2T00075826001,GSBRNA2T00135036001,GSBRNA2T00134867001,GSBRNA2T00156477001,GSBRNA2T00078672001,GSBRNA2T00051474001,GSBRNA2T00140639001,GSBRNA2T00151945001…
GO:BP	carbohydrate biosynthetic process	GO:0016051	0.00772163	2.11229	320	5221	38	80927	GSBRNA2T00056362001,GSBRNA2T00130716001,GSBRNA2T00130184001,GSBRNA2T00091722001,GSBRNA2T00000695001,GSBRNA2T00001997001,GSBRNA2T00118912001,GSBRNA2T00090182001,GSBRNA2T00065347001,GSBRNA2T00041400001,GSBRNA2T00068996001,GSBRNA2T00158181001,GSBRNA2T00038393001,GSBRNA2T00074674001,GSBRNA2T00058612001,GSBRNA2T00087501001,GSBRNA2T00070450001,GSBRNA2T00075826001,GSBRNA2T00135036001,GSBRNA2T00134867001…
GO:BP	cellulose biosynthetic process	GO:0030244	0.00772163	2.11229	65	5221	13	80927	GSBRNA2T00130184001,GSBRNA2T00065347001,GSBRNA2T00158181001,GSBRNA2T00074674001,GSBRNA2T00058612001,GSBRNA2T00075826001,GSBRNA2T00078672001,GSBRNA2T00051474001,GSBRNA2T00140639001,GSBRNA2T00018784001,GSBRNA2T00146216001,GSBRNA2T00143152001,GSBRNA2T00022088001
GO:BP	tricarboxylic acid cycle	GO:0006099	0.00905673	2.04303	102	5221	17	80927	GSBRNA2T00104838001,GSBRNA2T00009892001,GSBRNA2T00073303001,GSBRNA2T00117989001,GSBRNA2T00073230001,GSBRNA2T00123751001,GSBRNA2T00106160001,GSBRNA2T00134930001,GSBRNA2T00051837001,GSBRNA2T00051836001,GSBRNA2T00075173001,GSBRNA2T00078724001,GSBRNA2T00027285001,GSBRNA2T00124332001,GSBRNA2T00149169001,GSBRNA2T00080014001,GSBRNA2T00109674001
GO:BP	homeostatic process	GO:0042592	0.00905673	2.04303	547	5221	57	80927	GSBRNA2T00111677001,GSBRNA2T00082423001,GSBRNA2T00044318001,GSBRNA2T00131178001,GSBRNA2T00055043001,GSBRNA2T00000338001,GSBRNA2T00118837001,GSBRNA2T00065394001,GSBRNA2T00093561001,GSBRNA2T00151324001,GSBRNA2T00041719001,GSBRNA2T00041717001,GSBRNA2T00095419001,GSBRNA2T00137509001,GSBRNA2T00137341001,GSBRNA2T00137573001,GSBRNA2T00040186001,GSBRNA2T00101142001,GSBRNA2T00119157001,GSBRNA2T00119275001…
GO:BP	beta-glucan biosynthetic process	GO:0051274	0.0131571	1.88084	96	5221	16	80927	GSBRNA2T00130184001,GSBRNA2T00065347001,GSBRNA2T00158181001,GSBRNA2T00074674001,GSBRNA2T00058612001,GSBRNA2T00075826001,GSBRNA2T00135036001,GSBRNA2T00078672001,GSBRNA2T00051474001,GSBRNA2T00140639001,GSBRNA2T00151945001,GSBRNA2T00018784001,GSBRNA2T00091303001,GSBRNA2T00146216001,GSBRNA2T00143152001,GSBRNA2T00022088001
GO:BP	aerobic respiration	GO:0009060	0.013753	1.8616	106	5221	17	80927	GSBRNA2T00104838001,GSBRNA2T00009892001,GSBRNA2T00073303001,GSBRNA2T00117989001,GSBRNA2T00073230001,GSBRNA2T00123751001,GSBRNA2T00106160001,GSBRNA2T00134930001,GSBRNA2T00051837001,GSBRNA2T00051836001,GSBRNA2T00075173001,GSBRNA2T00078724001,GSBRNA2T00027285001,GSBRNA2T00124332001,GSBRNA2T00149169001,GSBRNA2T00080014001,GSBRNA2T00109674001
GO:BP	response to freezing	GO:0050826	0.0156865	1.80447	7	5221	4	80927	GSBRNA2T00014342001,GSBRNA2T00084121001,GSBRNA2T00098787001,GSBRNA2T00156010001
GO:BP	cell communication	GO:0007154	0.0168072	1.77451	1403	5221	122	80927	GSBRNA2T00068585001,GSBRNA2T00134581001,GSBRNA2T00083129001,GSBRNA2T00126266001,GSBRNA2T00054057001,GSBRNA2T00104998001,GSBRNA2T00130984001,GSBRNA2T00130609001,GSBRNA2T00130550001,GSBRNA2T00130803001,GSBRNA2T00130610001,GSBRNA2T00130608001,GSBRNA2T00130922001,GSBRNA2T00045807001,GSBRNA2T00101510001,GSBRNA2T00080814001,GSBRNA2T00122253001,GSBRNA2T00135968001,GSBRNA2T00032489001,GSBRNA2T00074558001…
GO:BP	metabolic process	GO:0008152	0.0180362	1.74386	22184	5221	1533	80927	GSBRNA2T00076760001,GSBRNA2T00068585001,GSBRNA2T00134310001,GSBRNA2T00134579001,GSBRNA2T00134408001,GSBRNA2T00134537001,GSBRNA2T00134621001,GSBRNA2T00081585001,GSBRNA2T00081601001,GSBRNA2T00083129001,GSBRNA2T00083137001,GSBRNA2T00126555001,GSBRNA2T00126573001,GSBRNA2T00126502001,GSBRNA2T00126581001,GSBRNA2T00126316001,GSBRNA2T00126361001,GSBRNA2T00039090001,GSBRNA2T00094614001,GSBRNA2T00094600001…
GO:BP	monosaccharide metabolic process	GO:0005996	0.0208767	1.68034	204	5221	26	80927	GSBRNA2T00111632001,GSBRNA2T00111966001,GSBRNA2T00089834001,GSBRNA2T00087819001,GSBRNA2T00009894001,GSBRNA2T00000695001,GSBRNA2T00037070001,GSBRNA2T00005644001,GSBRNA2T00000108001,GSBRNA2T00104230001,GSBRNA2T00092555001,GSBRNA2T00153727001,GSBRNA2T00134991001,GSBRNA2T00055135001,GSBRNA2T00116188001,GSBRNA2T00009230001,GSBRNA2T00003350001,GSBRNA2T00110528001,GSBRNA2T00060236001,GSBRNA2T00120104001…
GO:BP	regulation of biological quality	GO:0065008	0.0254879	1.59367	700	5221	67	80927	GSBRNA2T00111677001,GSBRNA2T00082423001,GSBRNA2T00044318001,GSBRNA2T00130502001,GSBRNA2T00131178001,GSBRNA2T00108570001,GSBRNA2T00055043001,GSBRNA2T00000338001,GSBRNA2T00118837001,GSBRNA2T00065394001,GSBRNA2T00093561001,GSBRNA2T00151324001,GSBRNA2T00041719001,GSBRNA2T00041717001,GSBRNA2T00095419001,GSBRNA2T00137509001,GSBRNA2T00137341001,GSBRNA2T00137573001,GSBRNA2T00040186001,GSBRNA2T00012900001…
GO:BP	cellular response to phosphate starvation	GO:0016036	0.0254879	1.59367	13	5221	5	80927	GSBRNA2T00101510001,GSBRNA2T00037342001,GSBRNA2T00081387001,GSBRNA2T00138970001,GSBRNA2T00063231001
GO:BP	cellular response to stimulus	GO:0051716	0.0284635	1.54571	1931	5221	159	80927	GSBRNA2T00068585001,GSBRNA2T00134581001,GSBRNA2T00083129001,GSBRNA2T00126266001,GSBRNA2T00052894001,GSBRNA2T00054057001,GSBRNA2T00104998001,GSBRNA2T00130984001,GSBRNA2T00130609001,GSBRNA2T00130550001,GSBRNA2T00130803001,GSBRNA2T00130610001,GSBRNA2T00130608001,GSBRNA2T00130922001,GSBRNA2T00088021001,GSBRNA2T00045807001,GSBRNA2T00101510001,GSBRNA2T00009862001,GSBRNA2T00080814001,GSBRNA2T00122253001…
GO:BP	transition metal ion transport	GO:0000041	0.029367	1.53214	95	5221	15	80927	GSBRNA2T00134274001,GSBRNA2T00111677001,GSBRNA2T00055043001,GSBRNA2T00000338001,GSBRNA2T00113869001,GSBRNA2T00148738001,GSBRNA2T00119157001,GSBRNA2T00115088001,GSBRNA2T00115090001,GSBRNA2T00043138001,GSBRNA2T00111008001,GSBRNA2T00141087001,GSBRNA2T00053245001,GSBRNA2T00098788001,GSBRNA2T00049287001
GO:BP	methionine metabolic process	GO:0006555	0.0300862	1.52163	42	5221	9	80927	GSBRNA2T00045161001,GSBRNA2T00148905001,GSBRNA2T00154181001,GSBRNA2T00097221001,GSBRNA2T00140873001,GSBRNA2T00094390001,GSBRNA2T00114810001,GSBRNA2T00155874001,GSBRNA2T00022029001
GO:BP	signal transduction	GO:0007165	0.0300862	1.52163	1271	5221	110	80927	GSBRNA2T00068585001,GSBRNA2T00134581001,GSBRNA2T00083129001,GSBRNA2T00126266001,GSBRNA2T00054057001,GSBRNA2T00104998001,GSBRNA2T00130984001,GSBRNA2T00130609001,GSBRNA2T00130550001,GSBRNA2T00130803001,GSBRNA2T00130610001,GSBRNA2T00130608001,GSBRNA2T00130922001,GSBRNA2T00045807001,GSBRNA2T00080814001,GSBRNA2T00122253001,GSBRNA2T00135968001,GSBRNA2T00032489001,GSBRNA2T00074558001,GSBRNA2T00074502001…
GO:BP	positive regulation of transcription, DNA-templated	GO:0045893	0.0300862	1.52163	245	5221	29	80927	GSBRNA2T00130641001,GSBRNA2T00129941001,GSBRNA2T00009905001,GSBRNA2T00118005001,GSBRNA2T00073102001,GSBRNA2T00126728001,GSBRNA2T00068991001,GSBRNA2T00154251001,GSBRNA2T00009540001,GSBRNA2T00054833001,GSBRNA2T00037347001,GSBRNA2T00074919001,GSBRNA2T00146477001,GSBRNA2T00134978001,GSBRNA2T00141156001,GSBRNA2T00106863001,GSBRNA2T00115333001,GSBRNA2T00124318001,GSBRNA2T00140350001,GSBRNA2T00112231001…
GO:BP	signaling	GO:0023052	0.0300862	1.52163	1285	5221	111	80927	GSBRNA2T00068585001,GSBRNA2T00134581001,GSBRNA2T00083129001,GSBRNA2T00126266001,GSBRNA2T00054057001,GSBRNA2T00104998001,GSBRNA2T00130984001,GSBRNA2T00130609001,GSBRNA2T00130550001,GSBRNA2T00130803001,GSBRNA2T00130610001,GSBRNA2T00130608001,GSBRNA2T00130922001,GSBRNA2T00045807001,GSBRNA2T00080814001,GSBRNA2T00122253001,GSBRNA2T00135968001,GSBRNA2T00032489001,GSBRNA2T00074558001,GSBRNA2T00074502001…
GO:BP	supramolecular fiber organization	GO:0097435	0.0300862	1.52163	157	5221	21	80927	GSBRNA2T00149651001,GSBRNA2T00033401001,GSBRNA2T00036794001,GSBRNA2T00110258001,GSBRNA2T00050662001,GSBRNA2T00154540001,GSBRNA2T00094842001,GSBRNA2T00047218001,GSBRNA2T00096127001,GSBRNA2T00147458001,GSBRNA2T00088549001,GSBRNA2T00060708001,GSBRNA2T00078606001,GSBRNA2T00151740001,GSBRNA2T00100850001,GSBRNA2T00074487001,GSBRNA2T00052518001,GSBRNA2T00031873001,GSBRNA2T00052594001,GSBRNA2T00115901001…
GO:BP	glucan biosynthetic process	GO:0009250	0.0302672	1.51903	116	5221	17	80927	GSBRNA2T00130184001,GSBRNA2T00065347001,GSBRNA2T00158181001,GSBRNA2T00074674001,GSBRNA2T00058612001,GSBRNA2T00075826001,GSBRNA2T00135036001,GSBRNA2T00078672001,GSBRNA2T00051474001,GSBRNA2T00140639001,GSBRNA2T00151945001,GSBRNA2T00018784001,GSBRNA2T00091303001,GSBRNA2T00146216001,GSBRNA2T00114672001,GSBRNA2T00143152001,GSBRNA2T00022088001
GO:BP	cellular process	GO:0009987	0.0317654	1.49805	23237	5221	1595	80927	GSBRNA2T00068585001,GSBRNA2T00134274001,GSBRNA2T00134310001,GSBRNA2T00134579001,GSBRNA2T00134581001,GSBRNA2T00134408001,GSBRNA2T00134537001,GSBRNA2T00134621001,GSBRNA2T00134123001,GSBRNA2T00081585001,GSBRNA2T00047596001,GSBRNA2T00083129001,GSBRNA2T00083137001,GSBRNA2T00126266001,GSBRNA2T00126293001,GSBRNA2T00126427001,GSBRNA2T00126502001,GSBRNA2T00126361001,GSBRNA2T00039049001,GSBRNA2T00039090001…
GO:BP	cellular amino acid metabolic process	GO:0006520	0.0326391	1.48626	854	5221	78	80927	GSBRNA2T00005823001,GSBRNA2T00123113001,GSBRNA2T00120631001,GSBRNA2T00015904001,GSBRNA2T00110274001,GSBRNA2T00130790001,GSBRNA2T00129743001,GSBRNA2T00092701001,GSBRNA2T00074513001,GSBRNA2T00079160001,GSBRNA2T00156359001,GSBRNA2T00156224001,GSBRNA2T00058164001,GSBRNA2T00144509001,GSBRNA2T00035765001,GSBRNA2T00066417001,GSBRNA2T00065379001,GSBRNA2T00065403001,GSBRNA2T00031131001,GSBRNA2T00094857001…
GO:BP	positive regulation of gene expression	GO:0010628	0.0331752	1.47919	259	5221	30	80927	GSBRNA2T00130641001,GSBRNA2T00129941001,GSBRNA2T00009905001,GSBRNA2T00118005001,GSBRNA2T00073102001,GSBRNA2T00126728001,GSBRNA2T00068991001,GSBRNA2T00154251001,GSBRNA2T00009540001,GSBRNA2T00054833001,GSBRNA2T00037347001,GSBRNA2T00074919001,GSBRNA2T00146477001,GSBRNA2T00134978001,GSBRNA2T00141156001,GSBRNA2T00139380001,GSBRNA2T00106863001,GSBRNA2T00115333001,GSBRNA2T00124318001,GSBRNA2T00140350001…
GO:BP	protein glycosylation	GO:0006486	0.037518	1.42576	297	5221	33	80927	GSBRNA2T00123011001,GSBRNA2T00135829001,GSBRNA2T00074524001,GSBRNA2T00118709001,GSBRNA2T00065348001,GSBRNA2T00050069001,GSBRNA2T00132182001,GSBRNA2T00106340001,GSBRNA2T00142040001,GSBRNA2T00102751001,GSBRNA2T00104062001,GSBRNA2T00066665001,GSBRNA2T00068059001,GSBRNA2T00012738001,GSBRNA2T00134949001,GSBRNA2T00135023001,GSBRNA2T00127896001,GSBRNA2T00088386001,GSBRNA2T00018513001,GSBRNA2T00100597001…
GO:BP	glycoprotein biosynthetic process	GO:0009101	0.037518	1.42576	297	5221	33	80927	GSBRNA2T00123011001,GSBRNA2T00135829001,GSBRNA2T00074524001,GSBRNA2T00118709001,GSBRNA2T00065348001,GSBRNA2T00050069001,GSBRNA2T00132182001,GSBRNA2T00106340001,GSBRNA2T00142040001,GSBRNA2T00102751001,GSBRNA2T00104062001,GSBRNA2T00066665001,GSBRNA2T00068059001,GSBRNA2T00012738001,GSBRNA2T00134949001,GSBRNA2T00135023001,GSBRNA2T00127896001,GSBRNA2T00088386001,GSBRNA2T00018513001,GSBRNA2T00100597001…
GO:BP	carbon fixation	GO:0015977	0.037518	1.42576	36	5221	8	80927	GSBRNA2T00104838001,GSBRNA2T00117989001,GSBRNA2T00123751001,GSBRNA2T00106160001,GSBRNA2T00051837001,GSBRNA2T00051836001,GSBRNA2T00124332001,GSBRNA2T00098486001
GO:BP	macromolecule glycosylation	GO:0043413	0.037518	1.42576	297	5221	33	80927	GSBRNA2T00123011001,GSBRNA2T00135829001,GSBRNA2T00074524001,GSBRNA2T00118709001,GSBRNA2T00065348001,GSBRNA2T00050069001,GSBRNA2T00132182001,GSBRNA2T00106340001,GSBRNA2T00142040001,GSBRNA2T00102751001,GSBRNA2T00104062001,GSBRNA2T00066665001,GSBRNA2T00068059001,GSBRNA2T00012738001,GSBRNA2T00134949001,GSBRNA2T00135023001,GSBRNA2T00127896001,GSBRNA2T00088386001,GSBRNA2T00018513001,GSBRNA2T00100597001…
GO:BP	transcription by RNA polymerase III	GO:0006383	0.037518	1.42576	36	5221	8	80927	GSBRNA2T00133018001,GSBRNA2T00152712001,GSBRNA2T00152713001,GSBRNA2T00151926001,GSBRNA2T00146223001,GSBRNA2T00064742001,GSBRNA2T00064741001,GSBRNA2T00141531001
GO:BP	response to temperature stimulus	GO:0009266	0.0389694	1.40928	53	5221	10	80927	GSBRNA2T00081585001,GSBRNA2T00068982001,GSBRNA2T00074697001,GSBRNA2T00014342001,GSBRNA2T00115296001,GSBRNA2T00084121001,GSBRNA2T00151751001,GSBRNA2T00143233001,GSBRNA2T00098787001,GSBRNA2T00156010001
GO:BP	alpha-amino acid metabolic process	GO:1901605	0.0389694	1.40928	480	5221	48	80927	GSBRNA2T00015904001,GSBRNA2T00130790001,GSBRNA2T00129743001,GSBRNA2T00092701001,GSBRNA2T00079160001,GSBRNA2T00156359001,GSBRNA2T00035765001,GSBRNA2T00066417001,GSBRNA2T00065379001,GSBRNA2T00031131001,GSBRNA2T00094857001,GSBRNA2T00132364001,GSBRNA2T00045161001,GSBRNA2T00099975001,GSBRNA2T00148905001,GSBRNA2T00101770001,GSBRNA2T00141888001,GSBRNA2T00154181001,GSBRNA2T00137462001,GSBRNA2T00093552001…
GO:BP	cation transmembrane transport	GO:0098655	0.0409348	1.38791	544	5221	53	80927	GSBRNA2T00134274001,GSBRNA2T00082423001,GSBRNA2T00068838001,GSBRNA2T00149612001,GSBRNA2T00087845001,GSBRNA2T00080785001,GSBRNA2T00080784001,GSBRNA2T00058454001,GSBRNA2T00000640001,GSBRNA2T00132057001,GSBRNA2T00057927001,GSBRNA2T00055043001,GSBRNA2T00058116001,GSBRNA2T00070254001,GSBRNA2T00154558001,GSBRNA2T00031172001,GSBRNA2T00113759001,GSBRNA2T00113869001,GSBRNA2T00085766001,GSBRNA2T00148738001…
GO:BP	glycoprotein metabolic process	GO:0009100	0.0412883	1.38417	300	5221	33	80927	GSBRNA2T00123011001,GSBRNA2T00135829001,GSBRNA2T00074524001,GSBRNA2T00118709001,GSBRNA2T00065348001,GSBRNA2T00050069001,GSBRNA2T00132182001,GSBRNA2T00106340001,GSBRNA2T00142040001,GSBRNA2T00102751001,GSBRNA2T00104062001,GSBRNA2T00066665001,GSBRNA2T00068059001,GSBRNA2T00012738001,GSBRNA2T00134949001,GSBRNA2T00135023001,GSBRNA2T00127896001,GSBRNA2T00088386001,GSBRNA2T00018513001,GSBRNA2T00100597001…
GO:BP	cellular amino acid biosynthetic process	GO:0008652	0.0422672	1.374	397	5221	41	80927	GSBRNA2T00130790001,GSBRNA2T00129743001,GSBRNA2T00092701001,GSBRNA2T00079160001,GSBRNA2T00156359001,GSBRNA2T00144509001,GSBRNA2T00035765001,GSBRNA2T00066417001,GSBRNA2T00065379001,GSBRNA2T00065403001,GSBRNA2T00047123001,GSBRNA2T00099975001,GSBRNA2T00148905001,GSBRNA2T00069052001,GSBRNA2T00142048001,GSBRNA2T00154181001,GSBRNA2T00137462001,GSBRNA2T00093552001,GSBRNA2T00105341001,GSBRNA2T00155189001…
GO:BP	metal ion transport	GO:0030001	0.0422672	1.374	533	5221	52	80927	GSBRNA2T00134274001,GSBRNA2T00111677001,GSBRNA2T00082423001,GSBRNA2T00000640001,GSBRNA2T00057927001,GSBRNA2T00055043001,GSBRNA2T00086246001,GSBRNA2T00118708001,GSBRNA2T00070254001,GSBRNA2T00000338001,GSBRNA2T00113869001,GSBRNA2T00085786001,GSBRNA2T00148738001,GSBRNA2T00095419001,GSBRNA2T00127402001,GSBRNA2T00119157001,GSBRNA2T00115088001,GSBRNA2T00115090001,GSBRNA2T00031651001,GSBRNA2T00043138001…
GO:BP	regulation of ARF protein signal transduction	GO:0032012	0.0434807	1.3617	10	5221	4	80927	GSBRNA2T00130922001,GSBRNA2T00154295001,GSBRNA2T00025408001,GSBRNA2T00121396001
GO:BP	positive regulation of RNA biosynthetic process	GO:1902680	0.0434807	1.3617	257	5221	29	80927	GSBRNA2T00130641001,GSBRNA2T00129941001,GSBRNA2T00009905001,GSBRNA2T00118005001,GSBRNA2T00073102001,GSBRNA2T00126728001,GSBRNA2T00068991001,GSBRNA2T00154251001,GSBRNA2T00009540001,GSBRNA2T00054833001,GSBRNA2T00037347001,GSBRNA2T00074919001,GSBRNA2T00146477001,GSBRNA2T00134978001,GSBRNA2T00141156001,GSBRNA2T00106863001,GSBRNA2T00115333001,GSBRNA2T00124318001,GSBRNA2T00140350001,GSBRNA2T00112231001…
GO:BP	ARF protein signal transduction	GO:0032011	0.0434807	1.3617	10	5221	4	80927	GSBRNA2T00130922001,GSBRNA2T00154295001,GSBRNA2T00025408001,GSBRNA2T00121396001
GO:BP	triterpenoid metabolic process	GO:0006722	0.0434807	1.3617	16	5221	5	80927	GSBRNA2T00146396001,GSBRNA2T00146397001,GSBRNA2T00128396001,GSBRNA2T00148041001,GSBRNA2T00148042001
GO:BP	triterpenoid biosynthetic process	GO:0016104	0.0434807	1.3617	16	5221	5	80927	GSBRNA2T00146396001,GSBRNA2T00146397001,GSBRNA2T00128396001,GSBRNA2T00148041001,GSBRNA2T00148042001
GO:BP	intracellular signal transduction	GO:0035556	0.0434807	1.3617	365	5221	38	80927	GSBRNA2T00134581001,GSBRNA2T00126266001,GSBRNA2T00054057001,GSBRNA2T00130984001,GSBRNA2T00130922001,GSBRNA2T00080814001,GSBRNA2T00135968001,GSBRNA2T00074558001,GSBRNA2T00122028001,GSBRNA2T00121796001,GSBRNA2T00016053001,GSBRNA2T00035787001,GSBRNA2T00021163001,GSBRNA2T00143652001,GSBRNA2T00151306001,GSBRNA2T00100106001,GSBRNA2T00041744001,GSBRNA2T00069036001,GSBRNA2T00154295001,GSBRNA2T00071756001…
GO:BP	regulation of small GTPase mediated signal transduction	GO:0051056	0.0434807	1.3617	10	5221	4	80927	GSBRNA2T00130922001,GSBRNA2T00154295001,GSBRNA2T00025408001,GSBRNA2T00121396001
GO:BP	positive regulation of RNA metabolic process	GO:0051254	0.0434807	1.3617	258	5221	29	80927	GSBRNA2T00130641001,GSBRNA2T00129941001,GSBRNA2T00009905001,GSBRNA2T00118005001,GSBRNA2T00073102001,GSBRNA2T00126728001,GSBRNA2T00068991001,GSBRNA2T00154251001,GSBRNA2T00009540001,GSBRNA2T00054833001,GSBRNA2T00037347001,GSBRNA2T00074919001,GSBRNA2T00146477001,GSBRNA2T00134978001,GSBRNA2T00141156001,GSBRNA2T00106863001,GSBRNA2T00115333001,GSBRNA2T00124318001,GSBRNA2T00140350001,GSBRNA2T00112231001…
GO:BP	actin filament organization	GO:0007015	0.0434807	1.3617	123	5221	17	80927	GSBRNA2T00149651001,GSBRNA2T00033401001,GSBRNA2T00036794001,GSBRNA2T00110258001,GSBRNA2T00050662001,GSBRNA2T00154540001,GSBRNA2T00047218001,GSBRNA2T00096127001,GSBRNA2T00088549001,GSBRNA2T00060708001,GSBRNA2T00100850001,GSBRNA2T00074487001,GSBRNA2T00052518001,GSBRNA2T00031873001,GSBRNA2T00052594001,GSBRNA2T00115901001,GSBRNA2T00074618001
GO:BP	terpenoid biosynthetic process	GO:0016114	0.0434807	1.3617	55	5221	10	80927	GSBRNA2T00081585001,GSBRNA2T00122142001,GSBRNA2T00146396001,GSBRNA2T00146397001,GSBRNA2T00032808001,GSBRNA2T00115296001,GSBRNA2T00128396001,GSBRNA2T00148041001,GSBRNA2T00148042001,GSBRNA2T00065537001
GO:BP	regulation of Ras protein signal transduction	GO:0046578	0.0434807	1.3617	10	5221	4	80927	GSBRNA2T00130922001,GSBRNA2T00154295001,GSBRNA2T00025408001,GSBRNA2T00121396001
GO:BP	Ras protein signal transduction	GO:0007265	0.0434807	1.3617	10	5221	4	80927	GSBRNA2T00130922001,GSBRNA2T00154295001,GSBRNA2T00025408001,GSBRNA2T00121396001
GO:BP	inositol catabolic process	GO:0019310	0.0434807	1.3617	10	5221	4	80927	GSBRNA2T00012920001,GSBRNA2T00059432001,GSBRNA2T00137995001,GSBRNA2T00115928001
GO:BP	positive regulation of nucleic acid-templated transcription	GO:1903508	0.0434807	1.3617	257	5221	29	80927	GSBRNA2T00130641001,GSBRNA2T00129941001,GSBRNA2T00009905001,GSBRNA2T00118005001,GSBRNA2T00073102001,GSBRNA2T00126728001,GSBRNA2T00068991001,GSBRNA2T00154251001,GSBRNA2T00009540001,GSBRNA2T00054833001,GSBRNA2T00037347001,GSBRNA2T00074919001,GSBRNA2T00146477001,GSBRNA2T00134978001,GSBRNA2T00141156001,GSBRNA2T00106863001,GSBRNA2T00115333001,GSBRNA2T00124318001,GSBRNA2T00140350001,GSBRNA2T00112231001…
GO:BP	cell wall biogenesis	GO:0042546	0.0434807	1.3617	178	5221	22	80927	GSBRNA2T00056362001,GSBRNA2T00130716001,GSBRNA2T00091722001,GSBRNA2T00156150001,GSBRNA2T00001997001,GSBRNA2T00038393001,GSBRNA2T00070450001,GSBRNA2T00134867001,GSBRNA2T00156477001,GSBRNA2T00100434001,GSBRNA2T00140476001,GSBRNA2T00151739001,GSBRNA2T00012858001,GSBRNA2T00128202001,GSBRNA2T00112429001,GSBRNA2T00146119001,GSBRNA2T00112619001,GSBRNA2T00093460001,GSBRNA2T00085525001,GSBRNA2T00018497001…
GO:BP	pectin catabolic process	GO:0045490	0.0434807	1.3617	255	5221	29	80927	GSBRNA2T00094600001,GSBRNA2T00005842001,GSBRNA2T00009823001,GSBRNA2T00053984001,GSBRNA2T00154463001,GSBRNA2T00151193001,GSBRNA2T00068962001,GSBRNA2T00095444001,GSBRNA2T00012972001,GSBRNA2T00012984001,GSBRNA2T00081373001,GSBRNA2T00000983001,GSBRNA2T00113020001,GSBRNA2T00078574001,GSBRNA2T00027328001,GSBRNA2T00138785001,GSBRNA2T00031414001,GSBRNA2T00040718001,GSBRNA2T00038555001,GSBRNA2T00119994001…
GO:BP	positive regulation of macromolecule biosynthetic process	GO:0010557	0.043767	1.35885	270	5221	30	80927	GSBRNA2T00130641001,GSBRNA2T00129941001,GSBRNA2T00009905001,GSBRNA2T00118005001,GSBRNA2T00073102001,GSBRNA2T00126728001,GSBRNA2T00068991001,GSBRNA2T00154251001,GSBRNA2T00009540001,GSBRNA2T00054833001,GSBRNA2T00037347001,GSBRNA2T00074919001,GSBRNA2T00146477001,GSBRNA2T00134978001,GSBRNA2T00141156001,GSBRNA2T00139380001,GSBRNA2T00106863001,GSBRNA2T00115333001,GSBRNA2T00124318001,GSBRNA2T00140350001…
GO:BP	hexose metabolic process	GO:0019318	0.0438819	1.35771	190	5221	23	80927	GSBRNA2T00111966001,GSBRNA2T00089834001,GSBRNA2T00087819001,GSBRNA2T00009894001,GSBRNA2T00000695001,GSBRNA2T00037070001,GSBRNA2T00005644001,GSBRNA2T00000108001,GSBRNA2T00104230001,GSBRNA2T00092555001,GSBRNA2T00153727001,GSBRNA2T00134991001,GSBRNA2T00055135001,GSBRNA2T00116188001,GSBRNA2T00009230001,GSBRNA2T00003350001,GSBRNA2T00120104001,GSBRNA2T00078126001,GSBRNA2T00151774001,GSBRNA2T00027060001…
GO:BP	cellular component organization or biogenesis	GO:0071840	0.0438819	1.35771	2683	5221	209	80927	GSBRNA2T00134310001,GSBRNA2T00039049001,GSBRNA2T00039090001,GSBRNA2T00111677001,GSBRNA2T00114269001,GSBRNA2T00120717001,GSBRNA2T00056362001,GSBRNA2T00149651001,GSBRNA2T00149613001,GSBRNA2T00087833001,GSBRNA2T00033401001,GSBRNA2T00036794001,GSBRNA2T00110258001,GSBRNA2T00110169001,GSBRNA2T00079773001,GSBRNA2T00130716001,GSBRNA2T00130420001,GSBRNA2T00130293001,GSBRNA2T00131164001,GSBRNA2T00101433001…
GO:BP	terpenoid metabolic process	GO:0006721	0.0438819	1.35771	56	5221	10	80927	GSBRNA2T00081585001,GSBRNA2T00122142001,GSBRNA2T00146396001,GSBRNA2T00146397001,GSBRNA2T00032808001,GSBRNA2T00115296001,GSBRNA2T00128396001,GSBRNA2T00148041001,GSBRNA2T00148042001,GSBRNA2T00065537001
GO:BP	positive regulation of biosynthetic process	GO:0009891	0.0438819	1.35771	271	5221	30	80927	GSBRNA2T00130641001,GSBRNA2T00129941001,GSBRNA2T00009905001,GSBRNA2T00118005001,GSBRNA2T00073102001,GSBRNA2T00126728001,GSBRNA2T00068991001,GSBRNA2T00154251001,GSBRNA2T00009540001,GSBRNA2T00054833001,GSBRNA2T00037347001,GSBRNA2T00074919001,GSBRNA2T00146477001,GSBRNA2T00134978001,GSBRNA2T00141156001,GSBRNA2T00139380001,GSBRNA2T00106863001,GSBRNA2T00115333001,GSBRNA2T00124318001,GSBRNA2T00140350001…
GO:BP	positive regulation of cellular biosynthetic process	GO:0031328	0.0438819	1.35771	271	5221	30	80927	GSBRNA2T00130641001,GSBRNA2T00129941001,GSBRNA2T00009905001,GSBRNA2T00118005001,GSBRNA2T00073102001,GSBRNA2T00126728001,GSBRNA2T00068991001,GSBRNA2T00154251001,GSBRNA2T00009540001,GSBRNA2T00054833001,GSBRNA2T00037347001,GSBRNA2T00074919001,GSBRNA2T00146477001,GSBRNA2T00134978001,GSBRNA2T00141156001,GSBRNA2T00139380001,GSBRNA2T00106863001,GSBRNA2T00115333001,GSBRNA2T00124318001,GSBRNA2T00140350001…
GO:BP	polysaccharide catabolic process	GO:0000272	0.0467942	1.32981	332	5221	35	80927	GSBRNA2T00094600001,GSBRNA2T00005842001,GSBRNA2T00009823001,GSBRNA2T00053984001,GSBRNA2T00154463001,GSBRNA2T00151193001,GSBRNA2T00151104001,GSBRNA2T00068962001,GSBRNA2T00095444001,GSBRNA2T00012972001,GSBRNA2T00012984001,GSBRNA2T00066233001,GSBRNA2T00081373001,GSBRNA2T00000983001,GSBRNA2T00113020001,GSBRNA2T00078574001,GSBRNA2T00027328001,GSBRNA2T00138785001,GSBRNA2T00031414001,GSBRNA2T00040718001…
GO:BP	positive regulation of nucleobase-containing compound metabolic process	GO:0045935	0.0473232	1.32493	261	5221	29	80927	GSBRNA2T00130641001,GSBRNA2T00129941001,GSBRNA2T00009905001,GSBRNA2T00118005001,GSBRNA2T00073102001,GSBRNA2T00126728001,GSBRNA2T00068991001,GSBRNA2T00154251001,GSBRNA2T00009540001,GSBRNA2T00054833001,GSBRNA2T00037347001,GSBRNA2T00074919001,GSBRNA2T00146477001,GSBRNA2T00134978001,GSBRNA2T00141156001,GSBRNA2T00106863001,GSBRNA2T00115333001,GSBRNA2T00124318001,GSBRNA2T00140350001,GSBRNA2T00112231001…
GO:BP	plant-type cell wall biogenesis	GO:0009832	0.0480802	1.31803	57	5221	10	80927	GSBRNA2T00130716001,GSBRNA2T00156150001,GSBRNA2T00100434001,GSBRNA2T00140476001,GSBRNA2T00151739001,GSBRNA2T00012858001,GSBRNA2T00146119001,GSBRNA2T00093460001,GSBRNA2T00121223001,GSBRNA2T00109521001
GO:BP	plant-type cell wall assembly	GO:0071668	0.0493116	1.30705	40	5221	8	80927	GSBRNA2T00156150001,GSBRNA2T00100434001,GSBRNA2T00140476001,GSBRNA2T00151739001,GSBRNA2T00012858001,GSBRNA2T00146119001,GSBRNA2T00093460001,GSBRNA2T00109521001
GO:BP	extracellular matrix organization	GO:0030198	0.0493116	1.30705	40	5221	8	80927	GSBRNA2T00156150001,GSBRNA2T00100434001,GSBRNA2T00140476001,GSBRNA2T00151739001,GSBRNA2T00012858001,GSBRNA2T00146119001,GSBRNA2T00093460001,GSBRNA2T00109521001
GO:BP	cellulose microfibril organization	GO:0010215	0.0493116	1.30705	40	5221	8	80927	GSBRNA2T00156150001,GSBRNA2T00100434001,GSBRNA2T00140476001,GSBRNA2T00151739001,GSBRNA2T00012858001,GSBRNA2T00146119001,GSBRNA2T00093460001,GSBRNA2T00109521001
GO:BP	organic substance metabolic process	GO:0071704	0.0493116	1.30705	18564	5221	1278	80927	GSBRNA2T00134310001,GSBRNA2T00134579001,GSBRNA2T00134408001,GSBRNA2T00134537001,GSBRNA2T00134621001,GSBRNA2T00081585001,GSBRNA2T00081601001,GSBRNA2T00083129001,GSBRNA2T00083137001,GSBRNA2T00126555001,GSBRNA2T00126573001,GSBRNA2T00126316001,GSBRNA2T00126361001,GSBRNA2T00039090001,GSBRNA2T00094614001,GSBRNA2T00094600001,GSBRNA2T00044826001,GSBRNA2T00087508001,GSBRNA2T00111781001,GSBRNA2T00111632001…
GO:BP	cell wall assembly	GO:0070726	0.0493116	1.30705	40	5221	8	80927	GSBRNA2T00156150001,GSBRNA2T00100434001,GSBRNA2T00140476001,GSBRNA2T00151739001,GSBRNA2T00012858001,GSBRNA2T00146119001,GSBRNA2T00093460001,GSBRNA2T00109521001
GO:BP	L-serine biosynthetic process	GO:0006564	0.0493116	1.30705	17	5221	5	80927	GSBRNA2T00130790001,GSBRNA2T00092701001,GSBRNA2T00035765001,GSBRNA2T00099975001,GSBRNA2T00121296001
GO:BP	extracellular structure organization	GO:0043062	0.0493116	1.30705	40	5221	8	80927	GSBRNA2T00156150001,GSBRNA2T00100434001,GSBRNA2T00140476001,GSBRNA2T00151739001,GSBRNA2T00012858001,GSBRNA2T00146119001,GSBRNA2T00093460001,GSBRNA2T00109521001
GO:BP	inorganic cation transmembrane transport	GO:0098662	0.0502506	1.29886	522	5221	50	80927	GSBRNA2T00134274001,GSBRNA2T00082423001,GSBRNA2T00068838001,GSBRNA2T00149612001,GSBRNA2T00087845001,GSBRNA2T00080785001,GSBRNA2T00080784001,GSBRNA2T00058454001,GSBRNA2T00132057001,GSBRNA2T00057927001,GSBRNA2T00055043001,GSBRNA2T00058116001,GSBRNA2T00070254001,GSBRNA2T00154558001,GSBRNA2T00031172001,GSBRNA2T00113759001,GSBRNA2T00113869001,GSBRNA2T00085766001,GSBRNA2T00148738001,GSBRNA2T00095419001…
GO:BP	cellular respiration	GO:0045333	0.0510627	1.2919	150	5221	19	80927	GSBRNA2T00104838001,GSBRNA2T00009892001,GSBRNA2T00073303001,GSBRNA2T00117989001,GSBRNA2T00073230001,GSBRNA2T00123751001,GSBRNA2T00063873001,GSBRNA2T00106160001,GSBRNA2T00134930001,GSBRNA2T00051837001,GSBRNA2T00051836001,GSBRNA2T00075173001,GSBRNA2T00078724001,GSBRNA2T00027285001,GSBRNA2T00124332001,GSBRNA2T00114725001,GSBRNA2T00149169001,GSBRNA2T00080014001,GSBRNA2T00109674001
GO:BP	cellular transition metal ion homeostasis	GO:0046916	0.0559406	1.25227	41	5221	8	80927	GSBRNA2T00111677001,GSBRNA2T00055043001,GSBRNA2T00000338001,GSBRNA2T00119157001,GSBRNA2T00102800001,GSBRNA2T00043138001,GSBRNA2T00111008001,GSBRNA2T00098788001
GO:BP	cellular component organization	GO:0016043	0.0559406	1.25227	2395	5221	187	80927	GSBRNA2T00134310001,GSBRNA2T00039049001,GSBRNA2T00111677001,GSBRNA2T00114269001,GSBRNA2T00120717001,GSBRNA2T00149651001,GSBRNA2T00149613001,GSBRNA2T00087833001,GSBRNA2T00033401001,GSBRNA2T00036794001,GSBRNA2T00110258001,GSBRNA2T00110169001,GSBRNA2T00079773001,GSBRNA2T00130420001,GSBRNA2T00130293001,GSBRNA2T00131164001,GSBRNA2T00101433001,GSBRNA2T00130184001,GSBRNA2T00086453001,GSBRNA2T00009905001…
GO:BP	chemical homeostasis	GO:0048878	0.0565254	1.24776	130	5221	17	80927	GSBRNA2T00111677001,GSBRNA2T00082423001,GSBRNA2T00044318001,GSBRNA2T00131178001,GSBRNA2T00055043001,GSBRNA2T00000338001,GSBRNA2T00093561001,GSBRNA2T00095419001,GSBRNA2T00119157001,GSBRNA2T00102800001,GSBRNA2T00043138001,GSBRNA2T00111008001,GSBRNA2T00038611001,GSBRNA2T00151004001,GSBRNA2T00120080001,GSBRNA2T00098788001,GSBRNA2T00121612001
GO:BP	biosynthetic process	GO:0009058	0.0585324	1.2326	8255	5221	589	80927	GSBRNA2T00134310001,GSBRNA2T00134579001,GSBRNA2T00134408001,GSBRNA2T00134621001,GSBRNA2T00081585001,GSBRNA2T00083129001,GSBRNA2T00083137001,GSBRNA2T00094614001,GSBRNA2T00044826001,GSBRNA2T00087508001,GSBRNA2T00111722001,GSBRNA2T00112029001,GSBRNA2T00005823001,GSBRNA2T00026805001,GSBRNA2T00026833001,GSBRNA2T00042253001,GSBRNA2T00051772001,GSBRNA2T00089961001,GSBRNA2T00063980001,GSBRNA2T00071333001…
GO:BP	galacturonan metabolic process	GO:0010393	0.0592266	1.22748	316	5221	33	80927	GSBRNA2T00094600001,GSBRNA2T00005842001,GSBRNA2T00009823001,GSBRNA2T00053984001,GSBRNA2T00154463001,GSBRNA2T00041400001,GSBRNA2T00151193001,GSBRNA2T00068962001,GSBRNA2T00095444001,GSBRNA2T00012972001,GSBRNA2T00012984001,GSBRNA2T00087501001,GSBRNA2T00081373001,GSBRNA2T00000983001,GSBRNA2T00113020001,GSBRNA2T00078574001,GSBRNA2T00027328001,GSBRNA2T00138785001,GSBRNA2T00031414001,GSBRNA2T00040718001…
GO:BP	pectin metabolic process	GO:0045488	0.0592266	1.22748	316	5221	33	80927	GSBRNA2T00094600001,GSBRNA2T00005842001,GSBRNA2T00009823001,GSBRNA2T00053984001,GSBRNA2T00154463001,GSBRNA2T00041400001,GSBRNA2T00151193001,GSBRNA2T00068962001,GSBRNA2T00095444001,GSBRNA2T00012972001,GSBRNA2T00012984001,GSBRNA2T00087501001,GSBRNA2T00081373001,GSBRNA2T00000983001,GSBRNA2T00113020001,GSBRNA2T00078574001,GSBRNA2T00027328001,GSBRNA2T00138785001,GSBRNA2T00031414001,GSBRNA2T00040718001…
GO:BP	response to cold	GO:0009409	0.0597098	1.22395	18	5221	5	80927	GSBRNA2T00014342001,GSBRNA2T00084121001,GSBRNA2T00143233001,GSBRNA2T00098787001,GSBRNA2T00156010001
GO:BP	transition metal ion homeostasis	GO:0055076	0.061015	1.21456	42	5221	8	80927	GSBRNA2T00111677001,GSBRNA2T00055043001,GSBRNA2T00000338001,GSBRNA2T00119157001,GSBRNA2T00102800001,GSBRNA2T00043138001,GSBRNA2T00111008001,GSBRNA2T00098788001
GO:BP	galactose metabolic process	GO:0006012	0.061015	1.21456	42	5221	8	80927	GSBRNA2T00087819001,GSBRNA2T00000108001,GSBRNA2T00092555001,GSBRNA2T00116188001,GSBRNA2T00003350001,GSBRNA2T00120104001,GSBRNA2T00027060001,GSBRNA2T00041892001
GO:BP	actin cytoskeleton organization	GO:0030036	0.0616969	1.20974	132	5221	17	80927	GSBRNA2T00149651001,GSBRNA2T00033401001,GSBRNA2T00036794001,GSBRNA2T00110258001,GSBRNA2T00050662001,GSBRNA2T00154540001,GSBRNA2T00047218001,GSBRNA2T00096127001,GSBRNA2T00088549001,GSBRNA2T00060708001,GSBRNA2T00100850001,GSBRNA2T00074487001,GSBRNA2T00052518001,GSBRNA2T00031873001,GSBRNA2T00052594001,GSBRNA2T00115901001,GSBRNA2T00074618001
GO:BP	inorganic ion transmembrane transport	GO:0098660	0.0616969	1.20974	569	5221	53	80927	GSBRNA2T00134274001,GSBRNA2T00082423001,GSBRNA2T00068838001,GSBRNA2T00149612001,GSBRNA2T00087845001,GSBRNA2T00080785001,GSBRNA2T00080784001,GSBRNA2T00058454001,GSBRNA2T00132057001,GSBRNA2T00057927001,GSBRNA2T00055043001,GSBRNA2T00058116001,GSBRNA2T00070254001,GSBRNA2T00154558001,GSBRNA2T00031172001,GSBRNA2T00113759001,GSBRNA2T00113869001,GSBRNA2T00085766001,GSBRNA2T00148738001,GSBRNA2T00095419001…
GO:BP	metal ion homeostasis	GO:0055065	0.0673466	1.17168	81	5221	12	80927	GSBRNA2T00111677001,GSBRNA2T00082423001,GSBRNA2T00055043001,GSBRNA2T00000338001,GSBRNA2T00095419001,GSBRNA2T00119157001,GSBRNA2T00102800001,GSBRNA2T00043138001,GSBRNA2T00111008001,GSBRNA2T00038611001,GSBRNA2T00120080001,GSBRNA2T00098788001
GO:BP	polyol catabolic process	GO:0046174	0.0673466	1.17168	12	5221	4	80927	GSBRNA2T00012920001,GSBRNA2T00059432001,GSBRNA2T00137995001,GSBRNA2T00115928001
GO:BP	alcohol catabolic process	GO:0046164	0.0673466	1.17168	12	5221	4	80927	GSBRNA2T00012920001,GSBRNA2T00059432001,GSBRNA2T00137995001,GSBRNA2T00115928001
GO:BP	cellular homeostasis	GO:0019725	0.0673466	1.17168	470	5221	45	80927	GSBRNA2T00111677001,GSBRNA2T00044318001,GSBRNA2T00131178001,GSBRNA2T00055043001,GSBRNA2T00000338001,GSBRNA2T00118837001,GSBRNA2T00065394001,GSBRNA2T00093561001,GSBRNA2T00151324001,GSBRNA2T00041719001,GSBRNA2T00041717001,GSBRNA2T00137509001,GSBRNA2T00137341001,GSBRNA2T00137573001,GSBRNA2T00101142001,GSBRNA2T00119157001,GSBRNA2T00119275001,GSBRNA2T00123897001,GSBRNA2T00123786001,GSBRNA2T00043048001…
GO:BP	actin filament-based process	GO:0030029	0.0689149	1.16169	134	5221	17	80927	GSBRNA2T00149651001,GSBRNA2T00033401001,GSBRNA2T00036794001,GSBRNA2T00110258001,GSBRNA2T00050662001,GSBRNA2T00154540001,GSBRNA2T00047218001,GSBRNA2T00096127001,GSBRNA2T00088549001,GSBRNA2T00060708001,GSBRNA2T00100850001,GSBRNA2T00074487001,GSBRNA2T00052518001,GSBRNA2T00031873001,GSBRNA2T00052594001,GSBRNA2T00115901001,GSBRNA2T00074618001
GO:BP	organic substance biosynthetic process	GO:1901576	0.0707458	1.1503	7947	5221	566	80927	GSBRNA2T00134310001,GSBRNA2T00134579001,GSBRNA2T00134408001,GSBRNA2T00134621001,GSBRNA2T00081585001,GSBRNA2T00083129001,GSBRNA2T00083137001,GSBRNA2T00094614001,GSBRNA2T00044826001,GSBRNA2T00087508001,GSBRNA2T00111722001,GSBRNA2T00112029001,GSBRNA2T00005823001,GSBRNA2T00026805001,GSBRNA2T00026833001,GSBRNA2T00042253001,GSBRNA2T00051772001,GSBRNA2T00089961001,GSBRNA2T00063980001,GSBRNA2T00071333001…
GO:BP	regulation of intracellular signal transduction	GO:1902531	0.0761831	1.11814	27	5221	6	80927	GSBRNA2T00130922001,GSBRNA2T00074558001,GSBRNA2T00154295001,GSBRNA2T00000095001,GSBRNA2T00025408001,GSBRNA2T00121396001
GO:BP	glutamine family amino acid metabolic process	GO:0009064	0.0769024	1.11406	147	5221	18	80927	GSBRNA2T00015904001,GSBRNA2T00079160001,GSBRNA2T00156359001,GSBRNA2T00065379001,GSBRNA2T00031131001,GSBRNA2T00094857001,GSBRNA2T00101770001,GSBRNA2T00137462001,GSBRNA2T00093552001,GSBRNA2T00155189001,GSBRNA2T00086345001,GSBRNA2T00112701001,GSBRNA2T00124740001,GSBRNA2T00057362001,GSBRNA2T00093890001,GSBRNA2T00079244001,GSBRNA2T00153857001,GSBRNA2T00123351001
GO:BP	glycosylation	GO:0070085	0.0769024	1.11406	324	5221	33	80927	GSBRNA2T00123011001,GSBRNA2T00135829001,GSBRNA2T00074524001,GSBRNA2T00118709001,GSBRNA2T00065348001,GSBRNA2T00050069001,GSBRNA2T00132182001,GSBRNA2T00106340001,GSBRNA2T00142040001,GSBRNA2T00102751001,GSBRNA2T00104062001,GSBRNA2T00066665001,GSBRNA2T00068059001,GSBRNA2T00012738001,GSBRNA2T00134949001,GSBRNA2T00135023001,GSBRNA2T00127896001,GSBRNA2T00088386001,GSBRNA2T00018513001,GSBRNA2T00100597001…
GO:BP	energy derivation by oxidation of organic compounds	GO:0015980	0.0786592	1.10425	170	5221	20	80927	GSBRNA2T00104838001,GSBRNA2T00009892001,GSBRNA2T00073303001,GSBRNA2T00117989001,GSBRNA2T00073230001,GSBRNA2T00123751001,GSBRNA2T00063873001,GSBRNA2T00106160001,GSBRNA2T00134930001,GSBRNA2T00051837001,GSBRNA2T00051836001,GSBRNA2T00075173001,GSBRNA2T00078724001,GSBRNA2T00027285001,GSBRNA2T00124332001,GSBRNA2T00114725001,GSBRNA2T00114672001,GSBRNA2T00149169001,GSBRNA2T00080014001,GSBRNA2T00109674001
GO:BP	carbohydrate catabolic process	GO:0016052	0.0834508	1.07857	503	5221	47	80927	GSBRNA2T00094600001,GSBRNA2T00005842001,GSBRNA2T00009823001,GSBRNA2T00053984001,GSBRNA2T00154463001,GSBRNA2T00093561001,GSBRNA2T00151193001,GSBRNA2T00151104001,GSBRNA2T00068962001,GSBRNA2T00095444001,GSBRNA2T00012972001,GSBRNA2T00012984001,GSBRNA2T00012920001,GSBRNA2T00066233001,GSBRNA2T00146469001,GSBRNA2T00059432001,GSBRNA2T00134657001,GSBRNA2T00134656001,GSBRNA2T00081373001,GSBRNA2T00000983001…
GO:BP	spermine metabolic process	GO:0008215	0.0834548	1.07855	20	5221	5	80927	GSBRNA2T00133973001,GSBRNA2T00130089001,GSBRNA2T00135480001,GSBRNA2T00035283001,GSBRNA2T00140522001
GO:BP	carbon utilization	GO:0015976	0.0834548	1.07855	20	5221	5	80927	GSBRNA2T00092279001,GSBRNA2T00087849001,GSBRNA2T00151787001,GSBRNA2T00033204001,GSBRNA2T00064132001
GO:BP	inositol metabolic process	GO:0006020	0.0834548	1.07855	20	5221	5	80927	GSBRNA2T00068996001,GSBRNA2T00012920001,GSBRNA2T00059432001,GSBRNA2T00137995001,GSBRNA2T00115928001
GO:BP	spermine biosynthetic process	GO:0006597	0.0834548	1.07855	20	5221	5	80927	GSBRNA2T00133973001,GSBRNA2T00130089001,GSBRNA2T00135480001,GSBRNA2T00035283001,GSBRNA2T00140522001
GO:BP	response to stimulus	GO:0050896	0.0844148	1.07358	3007	5221	227	80927	GSBRNA2T00068585001,GSBRNA2T00134581001,GSBRNA2T00081585001,GSBRNA2T00083129001,GSBRNA2T00126266001,GSBRNA2T00052894001,GSBRNA2T00054057001,GSBRNA2T00082423001,GSBRNA2T00104998001,GSBRNA2T00130984001,GSBRNA2T00130609001,GSBRNA2T00130868001,GSBRNA2T00130867001,GSBRNA2T00130550001,GSBRNA2T00130803001,GSBRNA2T00130610001,GSBRNA2T00130608001,GSBRNA2T00131028001,GSBRNA2T00130922001,GSBRNA2T00088021001…
GO:BP	cellular response to nutrient levels	GO:0031669	0.0844148	1.07358	28	5221	6	80927	GSBRNA2T00101510001,GSBRNA2T00037342001,GSBRNA2T00081387001,GSBRNA2T00138970001,GSBRNA2T00148208001,GSBRNA2T00063231001
GO:BP	copper ion transport	GO:0006825	0.0844148	1.07358	28	5221	6	80927	GSBRNA2T00111677001,GSBRNA2T00148738001,GSBRNA2T00115088001,GSBRNA2T00115090001,GSBRNA2T00141087001,GSBRNA2T00053245001
GO:BP	carbohydrate derivative biosynthetic process	GO:1901137	0.0844148	1.07358	661	5221	59	80927	GSBRNA2T00123011001,GSBRNA2T00009885001,GSBRNA2T00080785001,GSBRNA2T00080784001,GSBRNA2T00135480001,GSBRNA2T00135829001,GSBRNA2T00074524001,GSBRNA2T00118709001,GSBRNA2T00065348001,GSBRNA2T00156878001,GSBRNA2T00031131001,GSBRNA2T00105714001,GSBRNA2T00050069001,GSBRNA2T00132182001,GSBRNA2T00106340001,GSBRNA2T00085766001,GSBRNA2T00142040001,GSBRNA2T00074672001,GSBRNA2T00102751001,GSBRNA2T00000119001…
GO:BP	primary metabolic process	GO:0044238	0.0927639	1.03262	17664	5221	1209	80927	GSBRNA2T00134310001,GSBRNA2T00134579001,GSBRNA2T00134537001,GSBRNA2T00134621001,GSBRNA2T00081585001,GSBRNA2T00081601001,GSBRNA2T00083129001,GSBRNA2T00083137001,GSBRNA2T00126555001,GSBRNA2T00126573001,GSBRNA2T00126316001,GSBRNA2T00126361001,GSBRNA2T00039090001,GSBRNA2T00094614001,GSBRNA2T00094600001,GSBRNA2T00044826001,GSBRNA2T00087508001,GSBRNA2T00111781001,GSBRNA2T00111632001,GSBRNA2T00111722001…
GO:BP	inorganic ion homeostasis	GO:0098771	0.0947331	1.0235	86	5221	12	80927	GSBRNA2T00111677001,GSBRNA2T00082423001,GSBRNA2T00055043001,GSBRNA2T00000338001,GSBRNA2T00095419001,GSBRNA2T00119157001,GSBRNA2T00102800001,GSBRNA2T00043138001,GSBRNA2T00111008001,GSBRNA2T00038611001,GSBRNA2T00120080001,GSBRNA2T00098788001
GO:BP	cation homeostasis	GO:0055080	0.0947331	1.0235	86	5221	12	80927	GSBRNA2T00111677001,GSBRNA2T00082423001,GSBRNA2T00055043001,GSBRNA2T00000338001,GSBRNA2T00095419001,GSBRNA2T00119157001,GSBRNA2T00102800001,GSBRNA2T00043138001,GSBRNA2T00111008001,GSBRNA2T00038611001,GSBRNA2T00120080001,GSBRNA2T00098788001
GO:BP	copper ion transmembrane transport	GO:0035434	0.0973617	1.01161	21	5221	5	80927	GSBRNA2T00148738001,GSBRNA2T00115088001,GSBRNA2T00115090001,GSBRNA2T00141087001,GSBRNA2T00053245001
GO:BP	iron ion transport	GO:0006826	0.0973617	1.01161	21	5221	5	80927	GSBRNA2T00134274001,GSBRNA2T00000338001,GSBRNA2T00111008001,GSBRNA2T00098788001,GSBRNA2T00049287001
GO:BP	methionine biosynthetic process	GO:0009086	0.101448	0.993756	38	5221	7	80927	GSBRNA2T00148905001,GSBRNA2T00154181001,GSBRNA2T00097221001,GSBRNA2T00140873001,GSBRNA2T00094390001,GSBRNA2T00114810001,GSBRNA2T00155874001
GO:BP	cytoskeleton organization	GO:0007010	0.102499	0.989282	309	5221	31	80927	GSBRNA2T00149651001,GSBRNA2T00033401001,GSBRNA2T00036794001,GSBRNA2T00110258001,GSBRNA2T00050662001,GSBRNA2T00074535001,GSBRNA2T00074534001,GSBRNA2T00126733001,GSBRNA2T00154540001,GSBRNA2T00094842001,GSBRNA2T00047218001,GSBRNA2T00148651001,GSBRNA2T00038392001,GSBRNA2T00028840001,GSBRNA2T00096127001,GSBRNA2T00147458001,GSBRNA2T00088549001,GSBRNA2T00060708001,GSBRNA2T00078606001,GSBRNA2T00142224001…
GO:BP	regulation of pH	GO:0006885	0.102499	0.989282	14	5221	4	80927	GSBRNA2T00082423001,GSBRNA2T00095419001,GSBRNA2T00038611001,GSBRNA2T00120080001
GO:BP	organic hydroxy compound catabolic process	GO:1901616	0.102499	0.989282	14	5221	4	80927	GSBRNA2T00012920001,GSBRNA2T00059432001,GSBRNA2T00137995001,GSBRNA2T00115928001
GO:BP	response to nutrient levels	GO:0031667	0.110542	0.956473	30	5221	6	80927	GSBRNA2T00101510001,GSBRNA2T00037342001,GSBRNA2T00081387001,GSBRNA2T00138970001,GSBRNA2T00148208001,GSBRNA2T00063231001
GO:BP	L-arabinose metabolic process	GO:0046373	0.111736	0.951808	8	5221	3	80927	GSBRNA2T00111632001,GSBRNA2T00110528001,GSBRNA2T00060236001
GO:BP	phenylpropanoid catabolic process	GO:0046271	0.111736	0.951808	39	5221	7	80927	GSBRNA2T00116916001,GSBRNA2T00155307001,GSBRNA2T00088812001,GSBRNA2T00152742001,GSBRNA2T00005397001,GSBRNA2T00047905001,GSBRNA2T00080011001
GO:BP	cation transport	GO:0006812	0.111736	0.951808	918	5221	77	80927	GSBRNA2T00134274001,GSBRNA2T00111677001,GSBRNA2T00082423001,GSBRNA2T00068838001,GSBRNA2T00149612001,GSBRNA2T00087845001,GSBRNA2T00080785001,GSBRNA2T00080784001,GSBRNA2T00058454001,GSBRNA2T00000640001,GSBRNA2T00132057001,GSBRNA2T00057927001,GSBRNA2T00055043001,GSBRNA2T00086246001,GSBRNA2T00118708001,GSBRNA2T00058116001,GSBRNA2T00070254001,GSBRNA2T00154558001,GSBRNA2T00000338001,GSBRNA2T00031172001…
GO:BP	lignin catabolic process	GO:0046274	0.111736	0.951808	39	5221	7	80927	GSBRNA2T00116916001,GSBRNA2T00155307001,GSBRNA2T00088812001,GSBRNA2T00152742001,GSBRNA2T00005397001,GSBRNA2T00047905001,GSBRNA2T00080011001
GO:BP	arabinose metabolic process	GO:0019566	0.111736	0.951808	8	5221	3	80927	GSBRNA2T00111632001,GSBRNA2T00110528001,GSBRNA2T00060236001
GO:BP	positive regulation of nitrogen compound metabolic process	GO:0051173	0.111736	0.951808	325	5221	32	80927	GSBRNA2T00130641001,GSBRNA2T00129941001,GSBRNA2T00009905001,GSBRNA2T00118005001,GSBRNA2T00073102001,GSBRNA2T00126733001,GSBRNA2T00126728001,GSBRNA2T00068991001,GSBRNA2T00154251001,GSBRNA2T00009540001,GSBRNA2T00054833001,GSBRNA2T00037347001,GSBRNA2T00074919001,GSBRNA2T00146477001,GSBRNA2T00134978001,GSBRNA2T00141156001,GSBRNA2T00139380001,GSBRNA2T00106863001,GSBRNA2T00115333001,GSBRNA2T00124318001…
GO:BP	purine nucleotide-sugar transmembrane transport	GO:0090480	0.111736	0.951808	3	5221	2	80927	GSBRNA2T00074564001,GSBRNA2T00081117001
GO:BP	positive regulation of macromolecule metabolic process	GO:0010604	0.111736	0.951808	325	5221	32	80927	GSBRNA2T00130641001,GSBRNA2T00129941001,GSBRNA2T00009905001,GSBRNA2T00118005001,GSBRNA2T00073102001,GSBRNA2T00126733001,GSBRNA2T00126728001,GSBRNA2T00068991001,GSBRNA2T00154251001,GSBRNA2T00009540001,GSBRNA2T00054833001,GSBRNA2T00037347001,GSBRNA2T00074919001,GSBRNA2T00146477001,GSBRNA2T00134978001,GSBRNA2T00141156001,GSBRNA2T00139380001,GSBRNA2T00106863001,GSBRNA2T00115333001,GSBRNA2T00124318001…
GO:BP	GDP-fucose transmembrane transport	GO:0015783	0.111736	0.951808	3	5221	2	80927	GSBRNA2T00074564001,GSBRNA2T00081117001
GO:BP	aspartate family amino acid metabolic process	GO:0009066	0.115308	0.938142	79	5221	11	80927	GSBRNA2T00129743001,GSBRNA2T00045161001,GSBRNA2T00148905001,GSBRNA2T00154181001,GSBRNA2T00097221001,GSBRNA2T00140873001,GSBRNA2T00079244001,GSBRNA2T00094390001,GSBRNA2T00114810001,GSBRNA2T00155874001,GSBRNA2T00022029001
GO:BP	positive regulation of cellular process	GO:0048522	0.118109	0.927716	390	5221	37	80927	GSBRNA2T00130641001,GSBRNA2T00129941001,GSBRNA2T00009905001,GSBRNA2T00074558001,GSBRNA2T00118005001,GSBRNA2T00073102001,GSBRNA2T00126733001,GSBRNA2T00126728001,GSBRNA2T00094842001,GSBRNA2T00068991001,GSBRNA2T00069045001,GSBRNA2T00154251001,GSBRNA2T00009540001,GSBRNA2T00000095001,GSBRNA2T00054833001,GSBRNA2T00037347001,GSBRNA2T00074919001,GSBRNA2T00146477001,GSBRNA2T00134978001,GSBRNA2T00141156001…
GO:BP	DNA topological change	GO:0006265	0.119729	0.921802	40	5221	7	80927	GSBRNA2T00134310001,GSBRNA2T00130420001,GSBRNA2T00058175001,GSBRNA2T00013005001,GSBRNA2T00157382001,GSBRNA2T00039985001,GSBRNA2T00122727001
GO:BP	Notch signaling pathway	GO:0007219	0.119729	0.921802	15	5221	4	80927	GSBRNA2T00032489001,GSBRNA2T00069045001,GSBRNA2T00018234001,GSBRNA2T00018458001
GO:BP	lignin metabolic process	GO:0009808	0.119729	0.921802	40	5221	7	80927	GSBRNA2T00116916001,GSBRNA2T00155307001,GSBRNA2T00088812001,GSBRNA2T00152742001,GSBRNA2T00005397001,GSBRNA2T00047905001,GSBRNA2T00080011001
GO:BP	'de novo' CTP biosynthetic process	GO:0044210	0.119729	0.921802	15	5221	4	80927	GSBRNA2T00156878001,GSBRNA2T00031131001,GSBRNA2T00105714001,GSBRNA2T00128475001
GO:BP	organonitrogen compound biosynthetic process	GO:1901566	0.123201	0.909385	3005	5221	224	80927	GSBRNA2T00134579001,GSBRNA2T00134408001,GSBRNA2T00094614001,GSBRNA2T00044826001,GSBRNA2T00111722001,GSBRNA2T00005823001,GSBRNA2T00123011001,GSBRNA2T00123113001,GSBRNA2T00085609001,GSBRNA2T00120631001,GSBRNA2T00133973001,GSBRNA2T00110274001,GSBRNA2T00130790001,GSBRNA2T00129743001,GSBRNA2T00129829001,GSBRNA2T00130089001,GSBRNA2T00009885001,GSBRNA2T00009904001,GSBRNA2T00009872001,GSBRNA2T00080785001…
GO:BP	positive regulation of cellular metabolic process	GO:0031325	0.134694	0.870652	331	5221	32	80927	GSBRNA2T00130641001,GSBRNA2T00129941001,GSBRNA2T00009905001,GSBRNA2T00118005001,GSBRNA2T00073102001,GSBRNA2T00126733001,GSBRNA2T00126728001,GSBRNA2T00068991001,GSBRNA2T00154251001,GSBRNA2T00009540001,GSBRNA2T00054833001,GSBRNA2T00037347001,GSBRNA2T00074919001,GSBRNA2T00146477001,GSBRNA2T00134978001,GSBRNA2T00141156001,GSBRNA2T00139380001,GSBRNA2T00106863001,GSBRNA2T00115333001,GSBRNA2T00124318001…
GO:BP	positive regulation of metabolic process	GO:0009893	0.134694	0.870652	331	5221	32	80927	GSBRNA2T00130641001,GSBRNA2T00129941001,GSBRNA2T00009905001,GSBRNA2T00118005001,GSBRNA2T00073102001,GSBRNA2T00126733001,GSBRNA2T00126728001,GSBRNA2T00068991001,GSBRNA2T00154251001,GSBRNA2T00009540001,GSBRNA2T00054833001,GSBRNA2T00037347001,GSBRNA2T00074919001,GSBRNA2T00146477001,GSBRNA2T00134978001,GSBRNA2T00141156001,GSBRNA2T00139380001,GSBRNA2T00106863001,GSBRNA2T00115333001,GSBRNA2T00124318001…
GO:BP	hemicellulose metabolic process	GO:0010410	0.143548	0.843004	115	5221	14	80927	GSBRNA2T00056362001,GSBRNA2T00130716001,GSBRNA2T00091722001,GSBRNA2T00001997001,GSBRNA2T00038393001,GSBRNA2T00070450001,GSBRNA2T00134867001,GSBRNA2T00156477001,GSBRNA2T00128202001,GSBRNA2T00112429001,GSBRNA2T00112619001,GSBRNA2T00085525001,GSBRNA2T00018497001,GSBRNA2T00121223001
GO:BP	organic substance transport	GO:0071702	0.144876	0.839004	1362	5221	108	80927	GSBRNA2T00134581001,GSBRNA2T00134123001,GSBRNA2T00126293001,GSBRNA2T00054039001,GSBRNA2T00055327001,GSBRNA2T00130924001,GSBRNA2T00129903001,GSBRNA2T00009905001,GSBRNA2T00080801001,GSBRNA2T00080814001,GSBRNA2T00135968001,GSBRNA2T00074564001,GSBRNA2T00074538001,GSBRNA2T00121796001,GSBRNA2T00081292001,GSBRNA2T00016053001,GSBRNA2T00095239001,GSBRNA2T00137296001,GSBRNA2T00000184001,GSBRNA2T00118914001…
GO:BP	sodium ion transmembrane transport	GO:0035725	0.145137	0.838221	9	5221	3	80927	GSBRNA2T00082423001,GSBRNA2T00095419001,GSBRNA2T00038611001
GO:BP	response to desiccation	GO:0009269	0.145137	0.838221	9	5221	3	80927	GSBRNA2T00101570001,GSBRNA2T00074020001,GSBRNA2T00138944001
GO:BP	cellular biosynthetic process	GO:0044249	0.145659	0.836664	7787	5221	547	80927	GSBRNA2T00134310001,GSBRNA2T00134579001,GSBRNA2T00134408001,GSBRNA2T00134621001,GSBRNA2T00081585001,GSBRNA2T00083129001,GSBRNA2T00083137001,GSBRNA2T00094614001,GSBRNA2T00044826001,GSBRNA2T00087508001,GSBRNA2T00111722001,GSBRNA2T00005823001,GSBRNA2T00026805001,GSBRNA2T00026833001,GSBRNA2T00042253001,GSBRNA2T00051772001,GSBRNA2T00089961001,GSBRNA2T00063980001,GSBRNA2T00071333001,GSBRNA2T00044326001…
GO:BP	cellular carbohydrate catabolic process	GO:0044275	0.148244	0.829021	62	5221	9	80927	GSBRNA2T00012920001,GSBRNA2T00066233001,GSBRNA2T00059432001,GSBRNA2T00137995001,GSBRNA2T00048945001,GSBRNA2T00084195001,GSBRNA2T00076643001,GSBRNA2T00115928001,GSBRNA2T00018415001
GO:BP	cellular response to external stimulus	GO:0071496	0.148244	0.829021	33	5221	6	80927	GSBRNA2T00101510001,GSBRNA2T00037342001,GSBRNA2T00081387001,GSBRNA2T00138970001,GSBRNA2T00148208001,GSBRNA2T00063231001
GO:BP	cell wall polysaccharide metabolic process	GO:0010383	0.148244	0.829021	116	5221	14	80927	GSBRNA2T00056362001,GSBRNA2T00130716001,GSBRNA2T00091722001,GSBRNA2T00001997001,GSBRNA2T00038393001,GSBRNA2T00070450001,GSBRNA2T00134867001,GSBRNA2T00156477001,GSBRNA2T00128202001,GSBRNA2T00112429001,GSBRNA2T00112619001,GSBRNA2T00085525001,GSBRNA2T00018497001,GSBRNA2T00121223001
GO:BP	cellular response to extracellular stimulus	GO:0031668	0.148244	0.829021	33	5221	6	80927	GSBRNA2T00101510001,GSBRNA2T00037342001,GSBRNA2T00081387001,GSBRNA2T00138970001,GSBRNA2T00148208001,GSBRNA2T00063231001
GO:BP	ion transmembrane transport	GO:0034220	0.149673	0.824858	704	5221	60	80927	GSBRNA2T00134274001,GSBRNA2T00082423001,GSBRNA2T00068838001,GSBRNA2T00149612001,GSBRNA2T00087845001,GSBRNA2T00080785001,GSBRNA2T00080784001,GSBRNA2T00058454001,GSBRNA2T00000640001,GSBRNA2T00132057001,GSBRNA2T00057927001,GSBRNA2T00055043001,GSBRNA2T00058116001,GSBRNA2T00070254001,GSBRNA2T00154558001,GSBRNA2T00031172001,GSBRNA2T00113759001,GSBRNA2T00113869001,GSBRNA2T00085766001,GSBRNA2T00148738001…
GO:BP	alpha-amino acid biosynthetic process	GO:1901607	0.153474	0.813965	336	5221	32	80927	GSBRNA2T00130790001,GSBRNA2T00129743001,GSBRNA2T00092701001,GSBRNA2T00079160001,GSBRNA2T00156359001,GSBRNA2T00035765001,GSBRNA2T00066417001,GSBRNA2T00065379001,GSBRNA2T00099975001,GSBRNA2T00148905001,GSBRNA2T00154181001,GSBRNA2T00137462001,GSBRNA2T00093552001,GSBRNA2T00105341001,GSBRNA2T00155189001,GSBRNA2T00134667001,GSBRNA2T00134985001,GSBRNA2T00100431001,GSBRNA2T00124740001,GSBRNA2T00008904001…
GO:BP	CTP biosynthetic process	GO:0006241	0.155462	0.808374	43	5221	7	80927	GSBRNA2T00009885001,GSBRNA2T00156878001,GSBRNA2T00031131001,GSBRNA2T00105714001,GSBRNA2T00074672001,GSBRNA2T00128475001,GSBRNA2T00109670001
GO:BP	pyrimidine ribonucleoside triphosphate biosynthetic process	GO:0009209	0.155462	0.808374	43	5221	7	80927	GSBRNA2T00009885001,GSBRNA2T00156878001,GSBRNA2T00031131001,GSBRNA2T00105714001,GSBRNA2T00074672001,GSBRNA2T00128475001,GSBRNA2T00109670001
GO:BP	CTP metabolic process	GO:0046036	0.155462	0.808374	43	5221	7	80927	GSBRNA2T00009885001,GSBRNA2T00156878001,GSBRNA2T00031131001,GSBRNA2T00105714001,GSBRNA2T00074672001,GSBRNA2T00128475001,GSBRNA2T00109670001
GO:BP	pyrimidine ribonucleoside triphosphate metabolic process	GO:0009208	0.155462	0.808374	43	5221	7	80927	GSBRNA2T00009885001,GSBRNA2T00156878001,GSBRNA2T00031131001,GSBRNA2T00105714001,GSBRNA2T00074672001,GSBRNA2T00128475001,GSBRNA2T00109670001
GO:BP	pyrimidine nucleoside triphosphate biosynthetic process	GO:0009148	0.155462	0.808374	43	5221	7	80927	GSBRNA2T00009885001,GSBRNA2T00156878001,GSBRNA2T00031131001,GSBRNA2T00105714001,GSBRNA2T00074672001,GSBRNA2T00128475001,GSBRNA2T00109670001
GO:BP	proton export across plasma membrane	GO:0120029	0.158319	0.800466	25	5221	5	80927	GSBRNA2T00068838001,GSBRNA2T00132057001,GSBRNA2T00146298001,GSBRNA2T00099169001,GSBRNA2T00155003001
GO:BP	cellular response to starvation	GO:0009267	0.158319	0.800466	25	5221	5	80927	GSBRNA2T00101510001,GSBRNA2T00037342001,GSBRNA2T00081387001,GSBRNA2T00138970001,GSBRNA2T00063231001
GO:BP	actin filament bundle assembly	GO:0051017	0.158319	0.800466	25	5221	5	80927	GSBRNA2T00033401001,GSBRNA2T00036794001,GSBRNA2T00088549001,GSBRNA2T00060708001,GSBRNA2T00074487001
GO:BP	actin filament bundle organization	GO:0061572	0.158319	0.800466	25	5221	5	80927	GSBRNA2T00033401001,GSBRNA2T00036794001,GSBRNA2T00088549001,GSBRNA2T00060708001,GSBRNA2T00074487001
GO:BP	ion homeostasis	GO:0050801	0.160889	0.793474	107	5221	13	80927	GSBRNA2T00111677001,GSBRNA2T00082423001,GSBRNA2T00044318001,GSBRNA2T00055043001,GSBRNA2T00000338001,GSBRNA2T00095419001,GSBRNA2T00119157001,GSBRNA2T00102800001,GSBRNA2T00043138001,GSBRNA2T00111008001,GSBRNA2T00038611001,GSBRNA2T00120080001,GSBRNA2T00098788001
GO:BP	macromolecule localization	GO:0033036	0.161315	0.792325	1136	5221	91	80927	GSBRNA2T00134581001,GSBRNA2T00134123001,GSBRNA2T00126293001,GSBRNA2T00054039001,GSBRNA2T00055327001,GSBRNA2T00130924001,GSBRNA2T00129903001,GSBRNA2T00009905001,GSBRNA2T00080801001,GSBRNA2T00080814001,GSBRNA2T00135968001,GSBRNA2T00108570001,GSBRNA2T00074538001,GSBRNA2T00121796001,GSBRNA2T00081292001,GSBRNA2T00016053001,GSBRNA2T00095239001,GSBRNA2T00000184001,GSBRNA2T00118914001,GSBRNA2T00035725001…
GO:BP	phosphatidylglycerol biosynthetic process	GO:0006655	0.172387	0.763496	4	5221	2	80927	GSBRNA2T00024782001,GSBRNA2T00063088001
GO:BP	S-adenosylmethioninamine biosynthetic process	GO:0006557	0.172387	0.763496	10	5221	3	80927	GSBRNA2T00135480001,GSBRNA2T00035283001,GSBRNA2T00140522001
GO:BP	UDP-glucose metabolic process	GO:0006011	0.172387	0.763496	4	5221	2	80927	GSBRNA2T00140625001,GSBRNA2T00015424001
GO:BP	protein depolymerization	GO:0051261	0.172387	0.763496	35	5221	6	80927	GSBRNA2T00149651001,GSBRNA2T00110258001,GSBRNA2T00050662001,GSBRNA2T00154540001,GSBRNA2T00096127001,GSBRNA2T00052594001
GO:BP	cardiolipin biosynthetic process	GO:0032049	0.172387	0.763496	4	5221	2	80927	GSBRNA2T00024782001,GSBRNA2T00063088001
GO:BP	cardiolipin metabolic process	GO:0032048	0.172387	0.763496	4	5221	2	80927	GSBRNA2T00024782001,GSBRNA2T00063088001
GO:BP	phosphatidylglycerol metabolic process	GO:0046471	0.172387	0.763496	4	5221	2	80927	GSBRNA2T00024782001,GSBRNA2T00063088001
GO:BP	S-adenosylmethioninamine metabolic process	GO:0046499	0.172387	0.763496	10	5221	3	80927	GSBRNA2T00135480001,GSBRNA2T00035283001,GSBRNA2T00140522001
GO:BP	response to extracellular stimulus	GO:0009991	0.172387	0.763496	35	5221	6	80927	GSBRNA2T00101510001,GSBRNA2T00037342001,GSBRNA2T00081387001,GSBRNA2T00138970001,GSBRNA2T00148208001,GSBRNA2T00063231001
GO:BP	actin filament depolymerization	GO:0030042	0.172387	0.763496	35	5221	6	80927	GSBRNA2T00149651001,GSBRNA2T00110258001,GSBRNA2T00050662001,GSBRNA2T00154540001,GSBRNA2T00096127001,GSBRNA2T00052594001
GO:BP	glutamine metabolic process	GO:0006541	0.178184	0.749132	55	5221	8	80927	GSBRNA2T00015904001,GSBRNA2T00156359001,GSBRNA2T00065379001,GSBRNA2T00031131001,GSBRNA2T00137462001,GSBRNA2T00093552001,GSBRNA2T00057362001,GSBRNA2T00079244001
GO:BP	transcription initiation from RNA polymerase II promoter	GO:0006367	0.178445	0.748494	45	5221	7	80927	GSBRNA2T00107710001,GSBRNA2T00131420001,GSBRNA2T00151250001,GSBRNA2T00041818001,GSBRNA2T00129370001,GSBRNA2T00109225001,GSBRNA2T00094562001
GO:BP	glucan metabolic process	GO:0044042	0.182009	0.739908	255	5221	25	80927	GSBRNA2T00130184001,GSBRNA2T00065347001,GSBRNA2T00158181001,GSBRNA2T00074674001,GSBRNA2T00058612001,GSBRNA2T00066233001,GSBRNA2T00075826001,GSBRNA2T00135036001,GSBRNA2T00078672001,GSBRNA2T00051474001,GSBRNA2T00140639001,GSBRNA2T00151945001,GSBRNA2T00048945001,GSBRNA2T00128202001,GSBRNA2T00018784001,GSBRNA2T00091303001,GSBRNA2T00146216001,GSBRNA2T00114672001,GSBRNA2T00112619001,GSBRNA2T00143152001…
GO:BP	cellular glucan metabolic process	GO:0006073	0.182009	0.739908	255	5221	25	80927	GSBRNA2T00130184001,GSBRNA2T00065347001,GSBRNA2T00158181001,GSBRNA2T00074674001,GSBRNA2T00058612001,GSBRNA2T00066233001,GSBRNA2T00075826001,GSBRNA2T00135036001,GSBRNA2T00078672001,GSBRNA2T00051474001,GSBRNA2T00140639001,GSBRNA2T00151945001,GSBRNA2T00048945001,GSBRNA2T00128202001,GSBRNA2T00018784001,GSBRNA2T00091303001,GSBRNA2T00146216001,GSBRNA2T00114672001,GSBRNA2T00112619001,GSBRNA2T00143152001…
GO:BP	cellular chemical homeostasis	GO:0055082	0.182009	0.739908	110	5221	13	80927	GSBRNA2T00111677001,GSBRNA2T00044318001,GSBRNA2T00131178001,GSBRNA2T00055043001,GSBRNA2T00000338001,GSBRNA2T00093561001,GSBRNA2T00119157001,GSBRNA2T00102800001,GSBRNA2T00043138001,GSBRNA2T00111008001,GSBRNA2T00151004001,GSBRNA2T00098788001,GSBRNA2T00121612001
GO:BP	serine family amino acid catabolic process	GO:0009071	0.182497	0.738743	18	5221	4	80927	GSBRNA2T00132364001,GSBRNA2T00141888001,GSBRNA2T00105341001,GSBRNA2T00141267001
GO:BP	glycine catabolic process	GO:0006546	0.182497	0.738743	18	5221	4	80927	GSBRNA2T00132364001,GSBRNA2T00141888001,GSBRNA2T00105341001,GSBRNA2T00141267001
GO:BP	chorismate metabolic process	GO:0046417	0.182497	0.738743	18	5221	4	80927	GSBRNA2T00144509001,GSBRNA2T00069052001,GSBRNA2T00071966001,GSBRNA2T00101955001
GO:BP	glycerolipid metabolic process	GO:0046486	0.187088	0.727955	307	5221	29	80927	GSBRNA2T00122075001,GSBRNA2T00156369001,GSBRNA2T00021163001,GSBRNA2T00087615001,GSBRNA2T00045091001,GSBRNA2T00101739001,GSBRNA2T00092513001,GSBRNA2T00029154001,GSBRNA2T00134675001,GSBRNA2T00051901001,GSBRNA2T00102315001,GSBRNA2T00136679001,GSBRNA2T00087068001,GSBRNA2T00124796001,GSBRNA2T00024782001,GSBRNA2T00089723001,GSBRNA2T00042892001,GSBRNA2T00031941001,GSBRNA2T00151781001,GSBRNA2T00091209001…
GO:BP	pyrimidine nucleoside triphosphate metabolic process	GO:0009147	0.191536	0.71775	46	5221	7	80927	GSBRNA2T00009885001,GSBRNA2T00156878001,GSBRNA2T00031131001,GSBRNA2T00105714001,GSBRNA2T00074672001,GSBRNA2T00128475001,GSBRNA2T00109670001
GO:BP	response to starvation	GO:0042594	0.192737	0.715035	27	5221	5	80927	GSBRNA2T00101510001,GSBRNA2T00037342001,GSBRNA2T00081387001,GSBRNA2T00138970001,GSBRNA2T00063231001
GO:BP	cell redox homeostasis	GO:0045454	0.193572	0.713157	360	5221	33	80927	GSBRNA2T00111677001,GSBRNA2T00118837001,GSBRNA2T00065394001,GSBRNA2T00151324001,GSBRNA2T00041719001,GSBRNA2T00041717001,GSBRNA2T00137509001,GSBRNA2T00137341001,GSBRNA2T00137573001,GSBRNA2T00101142001,GSBRNA2T00119275001,GSBRNA2T00123897001,GSBRNA2T00123786001,GSBRNA2T00043048001,GSBRNA2T00029143001,GSBRNA2T00106161001,GSBRNA2T00129238001,GSBRNA2T00009946001,GSBRNA2T00134981001,GSBRNA2T00051834001…
GO:BP	export from cell	GO:0140352	0.19624	0.707213	171	5221	18	80927	GSBRNA2T00068838001,GSBRNA2T00129956001,GSBRNA2T00135631001,GSBRNA2T00132057001,GSBRNA2T00036895001,GSBRNA2T00151527001,GSBRNA2T00015090001,GSBRNA2T00146298001,GSBRNA2T00031576001,GSBRNA2T00140363001,GSBRNA2T00151866001,GSBRNA2T00012814001,GSBRNA2T00143345001,GSBRNA2T00099169001,GSBRNA2T00099589001,GSBRNA2T00133567001,GSBRNA2T00155003001,GSBRNA2T00153085001
GO:BP	DNA-templated transcription, initiation	GO:0006352	0.19624	0.707213	147	5221	16	80927	GSBRNA2T00107710001,GSBRNA2T00133018001,GSBRNA2T00131420001,GSBRNA2T00151250001,GSBRNA2T00041818001,GSBRNA2T00129370001,GSBRNA2T00152712001,GSBRNA2T00109225001,GSBRNA2T00151880001,GSBRNA2T00146223001,GSBRNA2T00064742001,GSBRNA2T00064741001,GSBRNA2T00143359001,GSBRNA2T00141531001,GSBRNA2T00040499001,GSBRNA2T00094562001
GO:BP	anatomical structure homeostasis	GO:0060249	0.199596	0.699849	57	5221	8	80927	GSBRNA2T00040186001,GSBRNA2T00129306001,GSBRNA2T00109297001,GSBRNA2T00094380001,GSBRNA2T00158278001,GSBRNA2T00158277001,GSBRNA2T00044423001,GSBRNA2T00091996001
GO:BP	export across plasma membrane	GO:0140115	0.199596	0.699849	37	5221	6	80927	GSBRNA2T00068838001,GSBRNA2T00132057001,GSBRNA2T00146298001,GSBRNA2T00099169001,GSBRNA2T00133567001,GSBRNA2T00155003001
GO:BP	iron ion homeostasis	GO:0055072	0.199596	0.699849	11	5221	3	80927	GSBRNA2T00000338001,GSBRNA2T00111008001,GSBRNA2T00098788001
GO:BP	glycine decarboxylation via glycine cleavage system	GO:0019464	0.199596	0.699849	11	5221	3	80927	GSBRNA2T00132364001,GSBRNA2T00141888001,GSBRNA2T00141267001
GO:BP	carbohydrate derivative metabolic process	GO:1901135	0.199596	0.699849	1099	5221	87	80927	GSBRNA2T00051772001,GSBRNA2T00123011001,GSBRNA2T00068863001,GSBRNA2T00068862001,GSBRNA2T00009885001,GSBRNA2T00009894001,GSBRNA2T00080785001,GSBRNA2T00080784001,GSBRNA2T00135480001,GSBRNA2T00135829001,GSBRNA2T00074524001,GSBRNA2T00118709001,GSBRNA2T00064232001,GSBRNA2T00065348001,GSBRNA2T00156878001,GSBRNA2T00093561001,GSBRNA2T00031131001,GSBRNA2T00105714001,GSBRNA2T00050069001,GSBRNA2T00132182001…
GO:BP	telomere organization	GO:0032200	0.199596	0.699849	57	5221	8	80927	GSBRNA2T00040186001,GSBRNA2T00129306001,GSBRNA2T00109297001,GSBRNA2T00094380001,GSBRNA2T00158278001,GSBRNA2T00158277001,GSBRNA2T00044423001,GSBRNA2T00091996001
GO:BP	cellular iron ion homeostasis	GO:0006879	0.199596	0.699849	11	5221	3	80927	GSBRNA2T00000338001,GSBRNA2T00111008001,GSBRNA2T00098788001
GO:BP	tryptophanyl-tRNA aminoacylation	GO:0006436	0.199596	0.699849	11	5221	3	80927	GSBRNA2T00044557001,GSBRNA2T00077486001,GSBRNA2T00015284001
GO:BP	telomere maintenance	GO:0000723	0.199596	0.699849	57	5221	8	80927	GSBRNA2T00040186001,GSBRNA2T00129306001,GSBRNA2T00109297001,GSBRNA2T00094380001,GSBRNA2T00158278001,GSBRNA2T00158277001,GSBRNA2T00044423001,GSBRNA2T00091996001
GO:BP	potassium ion homeostasis	GO:0055075	0.203957	0.69046	19	5221	4	80927	GSBRNA2T00082423001,GSBRNA2T00095419001,GSBRNA2T00038611001,GSBRNA2T00120080001
GO:BP	nucleotide-sugar transmembrane transport	GO:0015780	0.219462	0.658641	38	5221	6	80927	GSBRNA2T00074564001,GSBRNA2T00045085001,GSBRNA2T00151425001,GSBRNA2T00081117001,GSBRNA2T00139077001,GSBRNA2T00021942001
GO:BP	sucrose metabolic process	GO:0005985	0.219462	0.658641	38	5221	6	80927	GSBRNA2T00002805001,GSBRNA2T00147625001,GSBRNA2T00146970001,GSBRNA2T00077498001,GSBRNA2T00038971001,GSBRNA2T00133598001
GO:BP	positive regulation of transcription by RNA polymerase II	GO:0045944	0.219462	0.658641	199	5221	20	80927	GSBRNA2T00129941001,GSBRNA2T00118005001,GSBRNA2T00073102001,GSBRNA2T00126728001,GSBRNA2T00068991001,GSBRNA2T00154251001,GSBRNA2T00054833001,GSBRNA2T00074919001,GSBRNA2T00146477001,GSBRNA2T00106863001,GSBRNA2T00115333001,GSBRNA2T00124318001,GSBRNA2T00140350001,GSBRNA2T00112231001,GSBRNA2T00071997001,GSBRNA2T00153123001,GSBRNA2T00033125001,GSBRNA2T00101933001,GSBRNA2T00101980001,GSBRNA2T00094562001
GO:BP	spermidine metabolic process	GO:0008216	0.235011	0.628911	29	5221	5	80927	GSBRNA2T00133973001,GSBRNA2T00130089001,GSBRNA2T00135480001,GSBRNA2T00035283001,GSBRNA2T00140522001
GO:BP	spermidine biosynthetic process	GO:0008295	0.235011	0.628911	29	5221	5	80927	GSBRNA2T00133973001,GSBRNA2T00130089001,GSBRNA2T00135480001,GSBRNA2T00035283001,GSBRNA2T00140522001
GO:BP	long-chain fatty acid transport	GO:0015909	0.239648	0.620426	12	5221	3	80927	GSBRNA2T00033287001,GSBRNA2T00091610001,GSBRNA2T00115966001
GO:BP	icosanoid secretion	GO:0032309	0.239648	0.620426	12	5221	3	80927	GSBRNA2T00033287001,GSBRNA2T00091610001,GSBRNA2T00115966001
GO:BP	arachidonic acid secretion	GO:0050482	0.239648	0.620426	12	5221	3	80927	GSBRNA2T00033287001,GSBRNA2T00091610001,GSBRNA2T00115966001
GO:BP	fatty acid transport	GO:0015908	0.239648	0.620426	12	5221	3	80927	GSBRNA2T00033287001,GSBRNA2T00091610001,GSBRNA2T00115966001
GO:BP	icosanoid transport	GO:0071715	0.239648	0.620426	12	5221	3	80927	GSBRNA2T00033287001,GSBRNA2T00091610001,GSBRNA2T00115966001
GO:BP	fatty acid derivative transport	GO:1901571	0.239648	0.620426	12	5221	3	80927	GSBRNA2T00033287001,GSBRNA2T00091610001,GSBRNA2T00115966001
GO:BP	arachidonate transport	GO:1903963	0.239648	0.620426	12	5221	3	80927	GSBRNA2T00033287001,GSBRNA2T00091610001,GSBRNA2T00115966001
GO:BP	glycerolipid biosynthetic process	GO:0045017	0.240775	0.618389	165	5221	17	80927	GSBRNA2T00156369001,GSBRNA2T00045091001,GSBRNA2T00101739001,GSBRNA2T00092513001,GSBRNA2T00051901001,GSBRNA2T00102315001,GSBRNA2T00136679001,GSBRNA2T00124796001,GSBRNA2T00024782001,GSBRNA2T00042892001,GSBRNA2T00151781001,GSBRNA2T00071427001,GSBRNA2T00063088001,GSBRNA2T00064143001,GSBRNA2T00065634001,GSBRNA2T00123325001,GSBRNA2T00139741001
GO:BP	sterol biosynthetic process	GO:0016126	0.25075	0.600759	50	5221	7	80927	GSBRNA2T00071250001,GSBRNA2T00028864001,GSBRNA2T00151882001,GSBRNA2T00146049001,GSBRNA2T00081328001,GSBRNA2T00098684001,GSBRNA2T00087438001
GO:BP	pyrimidine ribonucleotide metabolic process	GO:0009218	0.25075	0.600759	50	5221	7	80927	GSBRNA2T00009885001,GSBRNA2T00156878001,GSBRNA2T00031131001,GSBRNA2T00105714001,GSBRNA2T00074672001,GSBRNA2T00128475001,GSBRNA2T00109670001
GO:BP	pyrimidine ribonucleotide biosynthetic process	GO:0009220	0.25075	0.600759	50	5221	7	80927	GSBRNA2T00009885001,GSBRNA2T00156878001,GSBRNA2T00031131001,GSBRNA2T00105714001,GSBRNA2T00074672001,GSBRNA2T00128475001,GSBRNA2T00109670001
GO:BP	reproductive structure development	GO:0048608	0.254043	0.595093	130	5221	14	80927	GSBRNA2T00101575001,GSBRNA2T00137449001,GSBRNA2T00052025001,GSBRNA2T00074697001,GSBRNA2T00124025001,GSBRNA2T00033324001,GSBRNA2T00107612001,GSBRNA2T00151882001,GSBRNA2T00128202001,GSBRNA2T00024664001,GSBRNA2T00146015001,GSBRNA2T00146011001,GSBRNA2T00070205001,GSBRNA2T00018486001
GO:BP	reproductive system development	GO:0061458	0.254043	0.595093	130	5221	14	80927	GSBRNA2T00101575001,GSBRNA2T00137449001,GSBRNA2T00052025001,GSBRNA2T00074697001,GSBRNA2T00124025001,GSBRNA2T00033324001,GSBRNA2T00107612001,GSBRNA2T00151882001,GSBRNA2T00128202001,GSBRNA2T00024664001,GSBRNA2T00146015001,GSBRNA2T00146011001,GSBRNA2T00070205001,GSBRNA2T00018486001
GO:BP	positive regulation of biological process	GO:0048518	0.260183	0.584721	440	5221	38	80927	GSBRNA2T00130641001,GSBRNA2T00129941001,GSBRNA2T00009905001,GSBRNA2T00074558001,GSBRNA2T00118005001,GSBRNA2T00073102001,GSBRNA2T00126733001,GSBRNA2T00126728001,GSBRNA2T00094842001,GSBRNA2T00068991001,GSBRNA2T00069045001,GSBRNA2T00154251001,GSBRNA2T00009540001,GSBRNA2T00000095001,GSBRNA2T00054833001,GSBRNA2T00037347001,GSBRNA2T00037261001,GSBRNA2T00074919001,GSBRNA2T00146477001,GSBRNA2T00134978001…
GO:BP	glutamine biosynthetic process	GO:0006542	0.261141	0.583125	21	5221	4	80927	GSBRNA2T00156359001,GSBRNA2T00065379001,GSBRNA2T00137462001,GSBRNA2T00093552001
GO:BP	plant-type cell wall organization or biogenesis	GO:0071669	0.263327	0.579505	143	5221	15	80927	GSBRNA2T00130716001,GSBRNA2T00131164001,GSBRNA2T00135421001,GSBRNA2T00156150001,GSBRNA2T00102695001,GSBRNA2T00090635001,GSBRNA2T00100434001,GSBRNA2T00140476001,GSBRNA2T00151739001,GSBRNA2T00012858001,GSBRNA2T00146119001,GSBRNA2T00093460001,GSBRNA2T00017046001,GSBRNA2T00121223001,GSBRNA2T00109521001
GO:BP	carbohydrate derivative transport	GO:1901264	0.264889	0.576937	84	5221	10	80927	GSBRNA2T00074564001,GSBRNA2T00045085001,GSBRNA2T00151425001,GSBRNA2T00081117001,GSBRNA2T00139077001,GSBRNA2T00092248001,GSBRNA2T00083659001,GSBRNA2T00085896001,GSBRNA2T00085897001,GSBRNA2T00021942001
GO:BP	polyamine biosynthetic process	GO:0006596	0.267285	0.573025	51	5221	7	80927	GSBRNA2T00133973001,GSBRNA2T00130089001,GSBRNA2T00135480001,GSBRNA2T00074511001,GSBRNA2T00035283001,GSBRNA2T00140522001,GSBRNA2T00093046001
GO:BP	aspartate family amino acid biosynthetic process	GO:0009067	0.268868	0.57046	73	5221	9	80927	GSBRNA2T00129743001,GSBRNA2T00148905001,GSBRNA2T00154181001,GSBRNA2T00097221001,GSBRNA2T00140873001,GSBRNA2T00079244001,GSBRNA2T00094390001,GSBRNA2T00114810001,GSBRNA2T00155874001
GO:BP	sulfur amino acid metabolic process	GO:0000096	0.269869	0.568847	96	5221	11	80927	GSBRNA2T00045161001,GSBRNA2T00148905001,GSBRNA2T00154181001,GSBRNA2T00000139001,GSBRNA2T00097221001,GSBRNA2T00140873001,GSBRNA2T00094390001,GSBRNA2T00114810001,GSBRNA2T00155874001,GSBRNA2T00022029001,GSBRNA2T00109483001
GO:BP	catabolic process	GO:0009056	0.27932	0.553897	1625	5221	122	80927	GSBRNA2T00094600001,GSBRNA2T00005842001,GSBRNA2T00004540001,GSBRNA2T00131028001,GSBRNA2T00009862001,GSBRNA2T00009823001,GSBRNA2T00037127001,GSBRNA2T00005644001,GSBRNA2T00053984001,GSBRNA2T00154463001,GSBRNA2T00061996001,GSBRNA2T00093561001,GSBRNA2T00131613001,GSBRNA2T00087615001,GSBRNA2T00078816001,GSBRNA2T00132396001,GSBRNA2T00132364001,GSBRNA2T00151193001,GSBRNA2T00151104001,GSBRNA2T00012561001…
GO:BP	carbohydrate homeostasis	GO:0033500	0.285831	0.543891	22	5221	4	80927	GSBRNA2T00131178001,GSBRNA2T00093561001,GSBRNA2T00151004001,GSBRNA2T00121612001
GO:BP	alditol phosphate metabolic process	GO:0052646	0.285831	0.543891	22	5221	4	80927	GSBRNA2T00068863001,GSBRNA2T00068862001,GSBRNA2T00064232001,GSBRNA2T00146276001
GO:BP	polyamine metabolic process	GO:0006595	0.285831	0.543891	52	5221	7	80927	GSBRNA2T00133973001,GSBRNA2T00130089001,GSBRNA2T00135480001,GSBRNA2T00074511001,GSBRNA2T00035283001,GSBRNA2T00140522001,GSBRNA2T00093046001
GO:BP	serine family amino acid metabolic process	GO:0009069	0.285831	0.543891	109	5221	12	80927	GSBRNA2T00130790001,GSBRNA2T00092701001,GSBRNA2T00035765001,GSBRNA2T00132364001,GSBRNA2T00099975001,GSBRNA2T00141888001,GSBRNA2T00105341001,GSBRNA2T00000139001,GSBRNA2T00141267001,GSBRNA2T00155874001,GSBRNA2T00121296001,GSBRNA2T00109483001
GO:BP	cellular glucose homeostasis	GO:0001678	0.285831	0.543891	22	5221	4	80927	GSBRNA2T00131178001,GSBRNA2T00093561001,GSBRNA2T00151004001,GSBRNA2T00121612001
GO:BP	glucose homeostasis	GO:0042593	0.285831	0.543891	22	5221	4	80927	GSBRNA2T00131178001,GSBRNA2T00093561001,GSBRNA2T00151004001,GSBRNA2T00121612001
GO:BP	glycerol-3-phosphate metabolic process	GO:0006072	0.285831	0.543891	22	5221	4	80927	GSBRNA2T00068863001,GSBRNA2T00068862001,GSBRNA2T00064232001,GSBRNA2T00146276001
GO:BP	glycerophospholipid metabolic process	GO:0006650	0.285831	0.543891	272	5221	25	80927	GSBRNA2T00122075001,GSBRNA2T00156369001,GSBRNA2T00021163001,GSBRNA2T00087615001,GSBRNA2T00101739001,GSBRNA2T00029154001,GSBRNA2T00134675001,GSBRNA2T00051901001,GSBRNA2T00136679001,GSBRNA2T00087068001,GSBRNA2T00024782001,GSBRNA2T00089723001,GSBRNA2T00042892001,GSBRNA2T00031941001,GSBRNA2T00151781001,GSBRNA2T00091209001,GSBRNA2T00071427001,GSBRNA2T00114846001,GSBRNA2T00063088001,GSBRNA2T00064143001…
GO:BP	proline metabolic process	GO:0006560	0.285831	0.543891	22	5221	4	80927	GSBRNA2T00155189001,GSBRNA2T00112701001,GSBRNA2T00124740001,GSBRNA2T00123351001
GO:BP	lipid catabolic process	GO:0016042	0.286782	0.542449	86	5221	10	80927	GSBRNA2T00087615001,GSBRNA2T00132396001,GSBRNA2T00141865001,GSBRNA2T00033287001,GSBRNA2T00134772001,GSBRNA2T00091610001,GSBRNA2T00156524001,GSBRNA2T00078715001,GSBRNA2T00049312001,GSBRNA2T00115966001
GO:BP	secretion	GO:0046903	0.287453	0.541434	146	5221	15	80927	GSBRNA2T00129956001,GSBRNA2T00135631001,GSBRNA2T00036895001,GSBRNA2T00033287001,GSBRNA2T00151527001,GSBRNA2T00015090001,GSBRNA2T00031576001,GSBRNA2T00091610001,GSBRNA2T00140363001,GSBRNA2T00151866001,GSBRNA2T00012814001,GSBRNA2T00143345001,GSBRNA2T00099589001,GSBRNA2T00115966001,GSBRNA2T00153085001
GO:BP	iron ion transmembrane transport	GO:0034755	0.29425	0.531283	6	5221	2	80927	GSBRNA2T00134274001,GSBRNA2T00049287001
GO:BP	regulation of alcohol biosynthetic process	GO:1902930	0.29425	0.531283	6	5221	2	80927	GSBRNA2T00081585001,GSBRNA2T00115296001
GO:BP	citrate metabolic process	GO:0006101	0.29425	0.531283	6	5221	2	80927	GSBRNA2T00075173001,GSBRNA2T00149169001
GO:BP	regulation of abscisic acid biosynthetic process	GO:0010115	0.29425	0.531283	6	5221	2	80927	GSBRNA2T00081585001,GSBRNA2T00115296001
GO:BP	phenylpropanoid metabolic process	GO:0009698	0.296084	0.528585	53	5221	7	80927	GSBRNA2T00116916001,GSBRNA2T00155307001,GSBRNA2T00088812001,GSBRNA2T00152742001,GSBRNA2T00005397001,GSBRNA2T00047905001,GSBRNA2T00080011001
GO:BP	pentose-phosphate shunt	GO:0006098	0.304286	0.516718	43	5221	6	80927	GSBRNA2T00009894001,GSBRNA2T00032829001,GSBRNA2T00078126001,GSBRNA2T00151911001,GSBRNA2T00146034001,GSBRNA2T00133518001
GO:BP	ribonucleoside triphosphate metabolic process	GO:0009199	0.304286	0.516718	136	5221	14	80927	GSBRNA2T00009885001,GSBRNA2T00080785001,GSBRNA2T00080784001,GSBRNA2T00156878001,GSBRNA2T00031131001,GSBRNA2T00105714001,GSBRNA2T00085766001,GSBRNA2T00074672001,GSBRNA2T00000119001,GSBRNA2T00151907001,GSBRNA2T00119832001,GSBRNA2T00128475001,GSBRNA2T00115611001,GSBRNA2T00109670001
GO:BP	pyrimidine nucleotide salvage	GO:0032262	0.304286	0.516718	14	5221	3	80927	GSBRNA2T00009885001,GSBRNA2T00074672001,GSBRNA2T00109670001
GO:BP	double-strand break repair via homologous recombination	GO:0000724	0.304286	0.516718	23	5221	4	80927	GSBRNA2T00144461001,GSBRNA2T00134692001,GSBRNA2T00078557001,GSBRNA2T00094368001
GO:BP	nucleoside triphosphate biosynthetic process	GO:0009142	0.304286	0.516718	136	5221	14	80927	GSBRNA2T00009885001,GSBRNA2T00080785001,GSBRNA2T00080784001,GSBRNA2T00156878001,GSBRNA2T00031131001,GSBRNA2T00105714001,GSBRNA2T00085766001,GSBRNA2T00074672001,GSBRNA2T00000119001,GSBRNA2T00151907001,GSBRNA2T00119832001,GSBRNA2T00128475001,GSBRNA2T00115611001,GSBRNA2T00109670001
GO:BP	ribonucleoside triphosphate biosynthetic process	GO:0009201	0.304286	0.516718	136	5221	14	80927	GSBRNA2T00009885001,GSBRNA2T00080785001,GSBRNA2T00080784001,GSBRNA2T00156878001,GSBRNA2T00031131001,GSBRNA2T00105714001,GSBRNA2T00085766001,GSBRNA2T00074672001,GSBRNA2T00000119001,GSBRNA2T00151907001,GSBRNA2T00119832001,GSBRNA2T00128475001,GSBRNA2T00115611001,GSBRNA2T00109670001
GO:BP	secondary metabolic process	GO:0019748	0.304286	0.516718	76	5221	9	80927	GSBRNA2T00081585001,GSBRNA2T00116916001,GSBRNA2T00155307001,GSBRNA2T00088812001,GSBRNA2T00152742001,GSBRNA2T00005397001,GSBRNA2T00115296001,GSBRNA2T00047905001,GSBRNA2T00080011001
GO:BP	recombinational repair	GO:0000725	0.304286	0.516718	23	5221	4	80927	GSBRNA2T00144461001,GSBRNA2T00134692001,GSBRNA2T00078557001,GSBRNA2T00094368001
GO:BP	pentose metabolic process	GO:0019321	0.304286	0.516718	14	5221	3	80927	GSBRNA2T00111632001,GSBRNA2T00110528001,GSBRNA2T00060236001
GO:BP	pyrimidine ribonucleotide salvage	GO:0010138	0.304286	0.516718	14	5221	3	80927	GSBRNA2T00009885001,GSBRNA2T00074672001,GSBRNA2T00109670001
GO:BP	L-proline biosynthetic process	GO:0055129	0.304286	0.516718	14	5221	3	80927	GSBRNA2T00155189001,GSBRNA2T00124740001,GSBRNA2T00123351001
GO:BP	CTP salvage	GO:0044211	0.304286	0.516718	14	5221	3	80927	GSBRNA2T00009885001,GSBRNA2T00074672001,GSBRNA2T00109670001
GO:BP	NADPH regeneration	GO:0006740	0.304286	0.516718	43	5221	6	80927	GSBRNA2T00009894001,GSBRNA2T00032829001,GSBRNA2T00078126001,GSBRNA2T00151911001,GSBRNA2T00146034001,GSBRNA2T00133518001
GO:BP	glucose 6-phosphate metabolic process	GO:0051156	0.304286	0.516718	43	5221	6	80927	GSBRNA2T00009894001,GSBRNA2T00032829001,GSBRNA2T00078126001,GSBRNA2T00151911001,GSBRNA2T00146034001,GSBRNA2T00133518001
GO:BP	sterol metabolic process	GO:0016125	0.304861	0.515899	54	5221	7	80927	GSBRNA2T00071250001,GSBRNA2T00028864001,GSBRNA2T00151882001,GSBRNA2T00146049001,GSBRNA2T00081328001,GSBRNA2T00098684001,GSBRNA2T00087438001
GO:BP	glutamate metabolic process	GO:0006536	0.309116	0.509879	33	5221	5	80927	GSBRNA2T00094857001,GSBRNA2T00101770001,GSBRNA2T00086345001,GSBRNA2T00093890001,GSBRNA2T00153857001
GO:BP	cellular metal ion homeostasis	GO:0006875	0.321633	0.49264	66	5221	8	80927	GSBRNA2T00111677001,GSBRNA2T00055043001,GSBRNA2T00000338001,GSBRNA2T00119157001,GSBRNA2T00102800001,GSBRNA2T00043138001,GSBRNA2T00111008001,GSBRNA2T00098788001
GO:BP	cellular cation homeostasis	GO:0030003	0.321633	0.49264	66	5221	8	80927	GSBRNA2T00111677001,GSBRNA2T00055043001,GSBRNA2T00000338001,GSBRNA2T00119157001,GSBRNA2T00102800001,GSBRNA2T00043138001,GSBRNA2T00111008001,GSBRNA2T00098788001
GO:BP	ether metabolic process	GO:0018904	0.322694	0.49121	55	5221	7	80927	GSBRNA2T00065394001,GSBRNA2T00151324001,GSBRNA2T00041719001,GSBRNA2T00129238001,GSBRNA2T00059839001,GSBRNA2T00091301001,GSBRNA2T00052489001
GO:BP	NADP metabolic process	GO:0006739	0.322694	0.49121	55	5221	7	80927	GSBRNA2T00009894001,GSBRNA2T00032829001,GSBRNA2T00078126001,GSBRNA2T00151911001,GSBRNA2T00146034001,GSBRNA2T00122385001,GSBRNA2T00133518001
GO:BP	glycerol ether metabolic process	GO:0006662	0.322694	0.49121	55	5221	7	80927	GSBRNA2T00065394001,GSBRNA2T00151324001,GSBRNA2T00041719001,GSBRNA2T00129238001,GSBRNA2T00059839001,GSBRNA2T00091301001,GSBRNA2T00052489001
GO:BP	cellular modified amino acid biosynthetic process	GO:0042398	0.322694	0.49121	55	5221	7	80927	GSBRNA2T00134408001,GSBRNA2T00078636001,GSBRNA2T00027008001,GSBRNA2T00155426001,GSBRNA2T00049390001,GSBRNA2T00039019001,GSBRNA2T00109460001
GO:BP	positive regulation of development, heterochronic	GO:0045962	0.322981	0.490824	1	5221	1	80927	GSBRNA2T00114181001
GO:BP	purine ribonucleoside catabolic process	GO:0046130	0.322981	0.490824	1	5221	1	80927	GSBRNA2T00002582001
GO:BP	monovalent inorganic cation homeostasis	GO:0055067	0.322981	0.490824	24	5221	4	80927	GSBRNA2T00082423001,GSBRNA2T00095419001,GSBRNA2T00038611001,GSBRNA2T00120080001
GO:BP	magnesium ion transport	GO:0015693	0.322981	0.490824	24	5221	4	80927	GSBRNA2T00070254001,GSBRNA2T00151989001,GSBRNA2T00111234001,GSBRNA2T00103237001
GO:BP	response to water deprivation	GO:0009414	0.322981	0.490824	24	5221	4	80927	GSBRNA2T00101570001,GSBRNA2T00005544001,GSBRNA2T00074020001,GSBRNA2T00138944001
GO:BP	regulation of Notch signaling pathway	GO:0008593	0.322981	0.490824	1	5221	1	80927	GSBRNA2T00069045001
GO:BP	folic acid-containing compound biosynthetic process	GO:0009396	0.322981	0.490824	34	5221	5	80927	GSBRNA2T00134408001,GSBRNA2T00078636001,GSBRNA2T00027008001,GSBRNA2T00049390001,GSBRNA2T00039019001
GO:BP	purine nucleoside catabolic process	GO:0006152	0.322981	0.490824	1	5221	1	80927	GSBRNA2T00002582001
GO:BP	S-adenosylhomocysteine catabolic process	GO:0019510	0.322981	0.490824	1	5221	1	80927	GSBRNA2T00002582001
GO:BP	cellular response to cold	GO:0070417	0.322981	0.490824	1	5221	1	80927	GSBRNA2T00143233001
GO:BP	positive regulation of Notch signaling pathway	GO:0045747	0.322981	0.490824	1	5221	1	80927	GSBRNA2T00069045001
GO:BP	spermidine hydroxycinnamate conjugate biosynthetic process	GO:0080088	0.322981	0.490824	1	5221	1	80927	GSBRNA2T00070205001
GO:BP	S-adenosylhomocysteine metabolic process	GO:0046498	0.322981	0.490824	1	5221	1	80927	GSBRNA2T00002582001
GO:BP	pyrimidine-containing compound salvage	GO:0008655	0.324834	0.488338	15	5221	3	80927	GSBRNA2T00009885001,GSBRNA2T00074672001,GSBRNA2T00109670001
GO:BP	intracellular sterol transport	GO:0032366	0.324834	0.488338	15	5221	3	80927	GSBRNA2T00085405001,GSBRNA2T00078620001,GSBRNA2T00093462001
GO:BP	organic hydroxy compound transport	GO:0015850	0.324834	0.488338	15	5221	3	80927	GSBRNA2T00085405001,GSBRNA2T00078620001,GSBRNA2T00093462001
GO:BP	nucleoside triphosphate metabolic process	GO:0009141	0.324834	0.488338	140	5221	14	80927	GSBRNA2T00009885001,GSBRNA2T00080785001,GSBRNA2T00080784001,GSBRNA2T00156878001,GSBRNA2T00031131001,GSBRNA2T00105714001,GSBRNA2T00085766001,GSBRNA2T00074672001,GSBRNA2T00000119001,GSBRNA2T00151907001,GSBRNA2T00119832001,GSBRNA2T00128475001,GSBRNA2T00115611001,GSBRNA2T00109670001
GO:BP	sterol transport	GO:0015918	0.324834	0.488338	15	5221	3	80927	GSBRNA2T00085405001,GSBRNA2T00078620001,GSBRNA2T00093462001
GO:BP	mannose metabolic process	GO:0006013	0.324834	0.488338	15	5221	3	80927	GSBRNA2T00005644001,GSBRNA2T00134991001,GSBRNA2T00151774001
GO:BP	transcription elongation from RNA polymerase II promoter	GO:0006368	0.324834	0.488338	15	5221	3	80927	GSBRNA2T00009905001,GSBRNA2T00146129001,GSBRNA2T00094562001
GO:BP	organic hydroxy compound biosynthetic process	GO:1901617	0.324834	0.488338	103	5221	11	80927	GSBRNA2T00081585001,GSBRNA2T00071250001,GSBRNA2T00068996001,GSBRNA2T00028864001,GSBRNA2T00115296001,GSBRNA2T00151882001,GSBRNA2T00146159001,GSBRNA2T00146049001,GSBRNA2T00081328001,GSBRNA2T00098684001,GSBRNA2T00087438001
GO:BP	intracellular lipid transport	GO:0032365	0.324834	0.488338	15	5221	3	80927	GSBRNA2T00085405001,GSBRNA2T00078620001,GSBRNA2T00093462001
GO:BP	manganese ion transmembrane transport	GO:0071421	0.324834	0.488338	15	5221	3	80927	GSBRNA2T00055043001,GSBRNA2T00119157001,GSBRNA2T00043138001
GO:BP	nucleobase-containing compound transport	GO:0015931	0.324834	0.488338	127	5221	13	80927	GSBRNA2T00009905001,GSBRNA2T00074564001,GSBRNA2T00045085001,GSBRNA2T00001851001,GSBRNA2T00151425001,GSBRNA2T00081117001,GSBRNA2T00018529001,GSBRNA2T00139077001,GSBRNA2T00092248001,GSBRNA2T00083659001,GSBRNA2T00085896001,GSBRNA2T00085897001,GSBRNA2T00021942001
GO:BP	translational elongation	GO:0006414	0.324834	0.488338	91	5221	10	80927	GSBRNA2T00074507001,GSBRNA2T00144571001,GSBRNA2T00012633001,GSBRNA2T00151472001,GSBRNA2T00142819001,GSBRNA2T00139380001,GSBRNA2T00117590001,GSBRNA2T00123376001,GSBRNA2T00018471001,GSBRNA2T00109637001
GO:BP	manganese ion transport	GO:0006828	0.324834	0.488338	15	5221	3	80927	GSBRNA2T00055043001,GSBRNA2T00119157001,GSBRNA2T00043138001
GO:BP	small molecule catabolic process	GO:0044282	0.329869	0.481658	128	5221	13	80927	GSBRNA2T00132396001,GSBRNA2T00132364001,GSBRNA2T00141865001,GSBRNA2T00141888001,GSBRNA2T00012920001,GSBRNA2T00105341001,GSBRNA2T00112701001,GSBRNA2T00059432001,GSBRNA2T00134772001,GSBRNA2T00141267001,GSBRNA2T00137995001,GSBRNA2T00115928001,GSBRNA2T00002582001
GO:BP	regulation of signal transduction	GO:0009966	0.329869	0.481658	68	5221	8	80927	GSBRNA2T00130922001,GSBRNA2T00074558001,GSBRNA2T00069045001,GSBRNA2T00154295001,GSBRNA2T00000095001,GSBRNA2T00025408001,GSBRNA2T00071535001,GSBRNA2T00121396001
GO:BP	regulation of signaling	GO:0023051	0.329869	0.481658	68	5221	8	80927	GSBRNA2T00130922001,GSBRNA2T00074558001,GSBRNA2T00069045001,GSBRNA2T00154295001,GSBRNA2T00000095001,GSBRNA2T00025408001,GSBRNA2T00071535001,GSBRNA2T00121396001
GO:BP	regulation of isoprenoid metabolic process	GO:0019747	0.329869	0.481658	7	5221	2	80927	GSBRNA2T00081585001,GSBRNA2T00115296001
GO:BP	regulation of cell communication	GO:0010646	0.329869	0.481658	68	5221	8	80927	GSBRNA2T00130922001,GSBRNA2T00074558001,GSBRNA2T00069045001,GSBRNA2T00154295001,GSBRNA2T00000095001,GSBRNA2T00025408001,GSBRNA2T00071535001,GSBRNA2T00121396001
GO:BP	organic substance catabolic process	GO:1901575	0.330031	0.481446	1366	5221	102	80927	GSBRNA2T00094600001,GSBRNA2T00005842001,GSBRNA2T00004540001,GSBRNA2T00009823001,GSBRNA2T00037127001,GSBRNA2T00005644001,GSBRNA2T00053984001,GSBRNA2T00154463001,GSBRNA2T00093561001,GSBRNA2T00131613001,GSBRNA2T00087615001,GSBRNA2T00078816001,GSBRNA2T00132396001,GSBRNA2T00132364001,GSBRNA2T00151193001,GSBRNA2T00151104001,GSBRNA2T00012561001,GSBRNA2T00117809001,GSBRNA2T00068962001,GSBRNA2T00069044001…
GO:BP	developmental process involved in reproduction	GO:0003006	0.332821	0.47779	141	5221	14	80927	GSBRNA2T00101575001,GSBRNA2T00137449001,GSBRNA2T00052025001,GSBRNA2T00074697001,GSBRNA2T00124025001,GSBRNA2T00033324001,GSBRNA2T00107612001,GSBRNA2T00151882001,GSBRNA2T00128202001,GSBRNA2T00024664001,GSBRNA2T00146015001,GSBRNA2T00146011001,GSBRNA2T00070205001,GSBRNA2T00018486001
GO:BP	ion transport	GO:0006811	0.338119	0.47093	1296	5221	97	80927	GSBRNA2T00134274001,GSBRNA2T00126427001,GSBRNA2T00111677001,GSBRNA2T00082423001,GSBRNA2T00068838001,GSBRNA2T00149612001,GSBRNA2T00087845001,GSBRNA2T00080785001,GSBRNA2T00080784001,GSBRNA2T00058454001,GSBRNA2T00000640001,GSBRNA2T00132057001,GSBRNA2T00057927001,GSBRNA2T00055043001,GSBRNA2T00086246001,GSBRNA2T00118708001,GSBRNA2T00058116001,GSBRNA2T00070254001,GSBRNA2T00154558001,GSBRNA2T00000338001…
GO:BP	phospholipid metabolic process	GO:0006644	0.340298	0.46814	352	5221	30	80927	GSBRNA2T00122075001,GSBRNA2T00156369001,GSBRNA2T00021163001,GSBRNA2T00087615001,GSBRNA2T00101739001,GSBRNA2T00068996001,GSBRNA2T00028864001,GSBRNA2T00029154001,GSBRNA2T00033287001,GSBRNA2T00134675001,GSBRNA2T00051901001,GSBRNA2T00091610001,GSBRNA2T00136679001,GSBRNA2T00087068001,GSBRNA2T00024782001,GSBRNA2T00089723001,GSBRNA2T00042892001,GSBRNA2T00031941001,GSBRNA2T00151781001,GSBRNA2T00091209001…
GO:BP	cell wall macromolecule metabolic process	GO:0044036	0.340298	0.46814	167	5221	16	80927	GSBRNA2T00056362001,GSBRNA2T00130716001,GSBRNA2T00091722001,GSBRNA2T00001997001,GSBRNA2T00038393001,GSBRNA2T00070450001,GSBRNA2T00134867001,GSBRNA2T00156477001,GSBRNA2T00139051001,GSBRNA2T00128202001,GSBRNA2T00112429001,GSBRNA2T00112619001,GSBRNA2T00085525001,GSBRNA2T00018360001,GSBRNA2T00018497001,GSBRNA2T00121223001
GO:BP	glycerophospholipid biosynthetic process	GO:0046474	0.353047	0.452167	130	5221	13	80927	GSBRNA2T00156369001,GSBRNA2T00101739001,GSBRNA2T00051901001,GSBRNA2T00136679001,GSBRNA2T00024782001,GSBRNA2T00042892001,GSBRNA2T00151781001,GSBRNA2T00071427001,GSBRNA2T00063088001,GSBRNA2T00064143001,GSBRNA2T00065634001,GSBRNA2T00123325001,GSBRNA2T00139741001
GO:BP	phosphatidylcholine biosynthetic process	GO:0006656	0.363821	0.439112	16	5221	3	80927	GSBRNA2T00156369001,GSBRNA2T00101739001,GSBRNA2T00071427001
GO:BP	DNA catabolic process	GO:0006308	0.363821	0.439112	16	5221	3	80927	GSBRNA2T00131613001,GSBRNA2T00086710001,GSBRNA2T00138191001
GO:BP	amine biosynthetic process	GO:0009309	0.367681	0.434529	94	5221	10	80927	GSBRNA2T00133973001,GSBRNA2T00130089001,GSBRNA2T00135480001,GSBRNA2T00074511001,GSBRNA2T00157431001,GSBRNA2T00035283001,GSBRNA2T00140522001,GSBRNA2T00093046001,GSBRNA2T00114799001,GSBRNA2T00018448001
GO:BP	cellular biogenic amine biosynthetic process	GO:0042401	0.367681	0.434529	94	5221	10	80927	GSBRNA2T00133973001,GSBRNA2T00130089001,GSBRNA2T00135480001,GSBRNA2T00074511001,GSBRNA2T00157431001,GSBRNA2T00035283001,GSBRNA2T00140522001,GSBRNA2T00093046001,GSBRNA2T00114799001,GSBRNA2T00018448001
GO:BP	shoot system development	GO:0048367	0.380145	0.420051	107	5221	11	80927	GSBRNA2T00101575001,GSBRNA2T00114181001,GSBRNA2T00137449001,GSBRNA2T00074697001,GSBRNA2T00124025001,GSBRNA2T00033324001,GSBRNA2T00107612001,GSBRNA2T00024664001,GSBRNA2T00146015001,GSBRNA2T00146011001,GSBRNA2T00018486001
GO:BP	glucose metabolic process	GO:0006006	0.380145	0.420051	59	5221	7	80927	GSBRNA2T00111966001,GSBRNA2T00009894001,GSBRNA2T00000695001,GSBRNA2T00104230001,GSBRNA2T00153727001,GSBRNA2T00078126001,GSBRNA2T00099206001
GO:BP	flower development	GO:0009908	0.385581	0.413885	83	5221	9	80927	GSBRNA2T00137449001,GSBRNA2T00074697001,GSBRNA2T00124025001,GSBRNA2T00033324001,GSBRNA2T00107612001,GSBRNA2T00024664001,GSBRNA2T00146015001,GSBRNA2T00146011001,GSBRNA2T00018486001
GO:BP	potassium ion transmembrane transport	GO:0071805	0.385581	0.413885	71	5221	8	80927	GSBRNA2T00057927001,GSBRNA2T00031651001,GSBRNA2T00145542001,GSBRNA2T00145543001,GSBRNA2T00145544001,GSBRNA2T00151780001,GSBRNA2T00018366001,GSBRNA2T00054207001
GO:BP	reproductive shoot system development	GO:0090567	0.385581	0.413885	83	5221	9	80927	GSBRNA2T00137449001,GSBRNA2T00074697001,GSBRNA2T00124025001,GSBRNA2T00033324001,GSBRNA2T00107612001,GSBRNA2T00024664001,GSBRNA2T00146015001,GSBRNA2T00146011001,GSBRNA2T00018486001
GO:BP	glutamine family amino acid biosynthetic process	GO:0009084	0.407577	0.38979	72	5221	8	80927	GSBRNA2T00079160001,GSBRNA2T00156359001,GSBRNA2T00065379001,GSBRNA2T00137462001,GSBRNA2T00093552001,GSBRNA2T00155189001,GSBRNA2T00124740001,GSBRNA2T00123351001
GO:BP	fatty acid catabolic process	GO:0009062	0.407577	0.38979	17	5221	3	80927	GSBRNA2T00132396001,GSBRNA2T00141865001,GSBRNA2T00134772001
GO:BP	cellular manganese ion homeostasis	GO:0030026	0.407577	0.38979	27	5221	4	80927	GSBRNA2T00055043001,GSBRNA2T00119157001,GSBRNA2T00102800001,GSBRNA2T00043138001
GO:BP	manganese ion homeostasis	GO:0055071	0.407577	0.38979	27	5221	4	80927	GSBRNA2T00055043001,GSBRNA2T00119157001,GSBRNA2T00102800001,GSBRNA2T00043138001
GO:BP	fatty acid beta-oxidation	GO:0006635	0.407577	0.38979	17	5221	3	80927	GSBRNA2T00132396001,GSBRNA2T00141865001,GSBRNA2T00134772001
GO:BP	monovalent inorganic cation transport	GO:0015672	0.414477	0.3825	430	5221	35	80927	GSBRNA2T00082423001,GSBRNA2T00068838001,GSBRNA2T00149612001,GSBRNA2T00087845001,GSBRNA2T00080785001,GSBRNA2T00080784001,GSBRNA2T00058454001,GSBRNA2T00132057001,GSBRNA2T00057927001,GSBRNA2T00058116001,GSBRNA2T00154558001,GSBRNA2T00031172001,GSBRNA2T00113759001,GSBRNA2T00085766001,GSBRNA2T00095419001,GSBRNA2T00000119001,GSBRNA2T00146298001,GSBRNA2T00031651001,GSBRNA2T00157534001,GSBRNA2T00145542001…
GO:BP	biological regulation	GO:0065007	0.4397	0.356843	6286	5221	430	80927	GSBRNA2T00068585001,GSBRNA2T00068605001,GSBRNA2T00134310001,GSBRNA2T00134581001,GSBRNA2T00081585001,GSBRNA2T00083129001,GSBRNA2T00126266001,GSBRNA2T00111677001,GSBRNA2T00026805001,GSBRNA2T00026833001,GSBRNA2T00042253001,GSBRNA2T00054057001,GSBRNA2T00071333001,GSBRNA2T00082423001,GSBRNA2T00044318001,GSBRNA2T00044326001,GSBRNA2T00044371001,GSBRNA2T00085609001,GSBRNA2T00104998001,GSBRNA2T00149561001…
GO:BP	abscission	GO:0009838	0.453369	0.343548	18	5221	3	80927	GSBRNA2T00137449001,GSBRNA2T00124025001,GSBRNA2T00107612001
GO:BP	positive regulation of signaling	GO:0023056	0.453369	0.343548	18	5221	3	80927	GSBRNA2T00074558001,GSBRNA2T00069045001,GSBRNA2T00000095001
GO:BP	membrane lipid metabolic process	GO:0006643	0.453369	0.343548	124	5221	12	80927	GSBRNA2T00054701001,GSBRNA2T00135015001,GSBRNA2T00051901001,GSBRNA2T00033553001,GSBRNA2T00136679001,GSBRNA2T00079341001,GSBRNA2T00151781001,GSBRNA2T00114846001,GSBRNA2T00083658001,GSBRNA2T00064143001,GSBRNA2T00123325001,GSBRNA2T00139741001
GO:BP	positive regulation of signal transduction	GO:0009967	0.453369	0.343548	18	5221	3	80927	GSBRNA2T00074558001,GSBRNA2T00069045001,GSBRNA2T00000095001
GO:BP	proline biosynthetic process	GO:0006561	0.453369	0.343548	18	5221	3	80927	GSBRNA2T00155189001,GSBRNA2T00124740001,GSBRNA2T00123351001
GO:BP	positive regulation of cell communication	GO:0010647	0.453369	0.343548	18	5221	3	80927	GSBRNA2T00074558001,GSBRNA2T00069045001,GSBRNA2T00000095001
GO:BP	floral organ abscission	GO:0010227	0.453369	0.343548	18	5221	3	80927	GSBRNA2T00137449001,GSBRNA2T00124025001,GSBRNA2T00107612001
GO:BP	magnesium ion transmembrane transport	GO:1903830	0.454859	0.342124	9	5221	2	80927	GSBRNA2T00070254001,GSBRNA2T00151989001
GO:BP	interstrand cross-link repair	GO:0036297	0.454859	0.342124	9	5221	2	80927	GSBRNA2T00070991001,GSBRNA2T00080033001
GO:BP	aromatic amino acid family biosynthetic process	GO:0009073	0.454859	0.342124	112	5221	11	80927	GSBRNA2T00144509001,GSBRNA2T00069052001,GSBRNA2T00105341001,GSBRNA2T00134667001,GSBRNA2T00100431001,GSBRNA2T00008904001,GSBRNA2T00071966001,GSBRNA2T00114799001,GSBRNA2T00101955001,GSBRNA2T00061333001,GSBRNA2T00018448001
GO:BP	transcription initiation from RNA polymerase III promoter	GO:0006384	0.454859	0.342124	9	5221	2	80927	GSBRNA2T00146223001,GSBRNA2T00141531001
GO:BP	organic acid catabolic process	GO:0016054	0.454859	0.342124	87	5221	9	80927	GSBRNA2T00132396001,GSBRNA2T00132364001,GSBRNA2T00141865001,GSBRNA2T00141888001,GSBRNA2T00105341001,GSBRNA2T00112701001,GSBRNA2T00134772001,GSBRNA2T00141267001,GSBRNA2T00002582001
GO:BP	asparagine metabolic process	GO:0006528	0.454859	0.342124	9	5221	2	80927	GSBRNA2T00129743001,GSBRNA2T00079244001
GO:BP	exocytosis	GO:0006887	0.454859	0.342124	125	5221	12	80927	GSBRNA2T00129956001,GSBRNA2T00135631001,GSBRNA2T00036895001,GSBRNA2T00151527001,GSBRNA2T00015090001,GSBRNA2T00031576001,GSBRNA2T00140363001,GSBRNA2T00151866001,GSBRNA2T00012814001,GSBRNA2T00143345001,GSBRNA2T00099589001,GSBRNA2T00153085001
GO:BP	cellular ion homeostasis	GO:0006873	0.454859	0.342124	87	5221	9	80927	GSBRNA2T00111677001,GSBRNA2T00044318001,GSBRNA2T00055043001,GSBRNA2T00000338001,GSBRNA2T00119157001,GSBRNA2T00102800001,GSBRNA2T00043138001,GSBRNA2T00111008001,GSBRNA2T00098788001
GO:BP	asparagine biosynthetic process	GO:0006529	0.454859	0.342124	9	5221	2	80927	GSBRNA2T00129743001,GSBRNA2T00079244001
GO:BP	carboxylic acid catabolic process	GO:0046395	0.454859	0.342124	87	5221	9	80927	GSBRNA2T00132396001,GSBRNA2T00132364001,GSBRNA2T00141865001,GSBRNA2T00141888001,GSBRNA2T00105341001,GSBRNA2T00112701001,GSBRNA2T00134772001,GSBRNA2T00141267001,GSBRNA2T00002582001
GO:BP	organelle organization	GO:0006996	0.454859	0.342124	1209	5221	89	80927	GSBRNA2T00134310001,GSBRNA2T00149651001,GSBRNA2T00033401001,GSBRNA2T00036794001,GSBRNA2T00110258001,GSBRNA2T00130420001,GSBRNA2T00130293001,GSBRNA2T00009905001,GSBRNA2T00136259001,GSBRNA2T00034777001,GSBRNA2T00050662001,GSBRNA2T00074535001,GSBRNA2T00074534001,GSBRNA2T00058175001,GSBRNA2T00126733001,GSBRNA2T00095233001,GSBRNA2T00095217001,GSBRNA2T00154540001,GSBRNA2T00035792001,GSBRNA2T00035679001…
GO:BP	tetrahydrofolylpolyglutamate biosynthetic process	GO:0046901	0.454859	0.342124	9	5221	2	80927	GSBRNA2T00078636001,GSBRNA2T00049390001
GO:BP	tetrahydrofolylpolyglutamate metabolic process	GO:0046900	0.454859	0.342124	9	5221	2	80927	GSBRNA2T00078636001,GSBRNA2T00049390001
GO:BP	folic acid-containing compound metabolic process	GO:0006760	0.454859	0.342124	63	5221	7	80927	GSBRNA2T00134408001,GSBRNA2T00045161001,GSBRNA2T00078636001,GSBRNA2T00027008001,GSBRNA2T00049390001,GSBRNA2T00022029001,GSBRNA2T00039019001
GO:BP	transcription by RNA polymerase II	GO:0006366	0.462567	0.334825	396	5221	32	80927	GSBRNA2T00134310001,GSBRNA2T00129941001,GSBRNA2T00009905001,GSBRNA2T00107710001,GSBRNA2T00118005001,GSBRNA2T00073102001,GSBRNA2T00126728001,GSBRNA2T00131420001,GSBRNA2T00151250001,GSBRNA2T00041818001,GSBRNA2T00068991001,GSBRNA2T00154251001,GSBRNA2T00054833001,GSBRNA2T00074919001,GSBRNA2T00129370001,GSBRNA2T00146477001,GSBRNA2T00090622001,GSBRNA2T00106863001,GSBRNA2T00078692001,GSBRNA2T00115333001…
GO:BP	maintenance of location	GO:0051235	0.462567	0.334825	29	5221	4	80927	GSBRNA2T00108570001,GSBRNA2T00128203001,GSBRNA2T00076636001,GSBRNA2T00139456001
GO:BP	cell surface receptor signaling pathway	GO:0007166	0.462567	0.334825	29	5221	4	80927	GSBRNA2T00032489001,GSBRNA2T00069045001,GSBRNA2T00018234001,GSBRNA2T00018458001
GO:BP	cell wall modification	GO:0042545	0.462567	0.334825	178	5221	16	80927	GSBRNA2T00009823001,GSBRNA2T00053984001,GSBRNA2T00068962001,GSBRNA2T00095444001,GSBRNA2T00012984001,GSBRNA2T00081373001,GSBRNA2T00078574001,GSBRNA2T00138785001,GSBRNA2T00040718001,GSBRNA2T00038555001,GSBRNA2T00119994001,GSBRNA2T00122699001,GSBRNA2T00099083001,GSBRNA2T00117658001,GSBRNA2T00066708001,GSBRNA2T00109599001
GO:BP	branched-chain amino acid biosynthetic process	GO:0009082	0.475499	0.32285	53	5221	6	80927	GSBRNA2T00066417001,GSBRNA2T00065403001,GSBRNA2T00047123001,GSBRNA2T00142048001,GSBRNA2T00134985001,GSBRNA2T00012847001
GO:BP	response to acid chemical	GO:0001101	0.475499	0.32285	41	5221	5	80927	GSBRNA2T00101570001,GSBRNA2T00005544001,GSBRNA2T00134984001,GSBRNA2T00074020001,GSBRNA2T00138944001
GO:BP	positive regulation of immune response	GO:0050778	0.475499	0.32285	2	5221	1	80927	GSBRNA2T00037261001
GO:BP	response to disaccharide	GO:0034285	0.475499	0.32285	2	5221	1	80927	GSBRNA2T00148208001
GO:BP	jasmonic acid mediated signaling pathway	GO:0009867	0.475499	0.32285	2	5221	1	80927	GSBRNA2T00037261001
GO:BP	induced systemic resistance, jasmonic acid mediated signaling pathway	GO:0009864	0.475499	0.32285	2	5221	1	80927	GSBRNA2T00037261001
GO:BP	histone deubiquitination	GO:0016578	0.475499	0.32285	2	5221	1	80927	GSBRNA2T00009905001
GO:BP	double-strand break repair	GO:0006302	0.475499	0.32285	30	5221	4	80927	GSBRNA2T00144461001,GSBRNA2T00134692001,GSBRNA2T00078557001,GSBRNA2T00094368001
GO:BP	induced systemic resistance	GO:0009682	0.475499	0.32285	2	5221	1	80927	GSBRNA2T00037261001
GO:BP	positive regulation of response to biotic stimulus	GO:0002833	0.475499	0.32285	2	5221	1	80927	GSBRNA2T00037261001
GO:BP	pteridine-containing compound biosynthetic process	GO:0042559	0.475499	0.32285	41	5221	5	80927	GSBRNA2T00134408001,GSBRNA2T00078636001,GSBRNA2T00027008001,GSBRNA2T00049390001,GSBRNA2T00039019001
GO:BP	response to water	GO:0009415	0.475499	0.32285	41	5221	5	80927	GSBRNA2T00101570001,GSBRNA2T00005544001,GSBRNA2T00134984001,GSBRNA2T00074020001,GSBRNA2T00138944001
GO:BP	positive regulation of response to external stimulus	GO:0032103	0.475499	0.32285	2	5221	1	80927	GSBRNA2T00037261001
GO:BP	nucleotide salvage	GO:0043173	0.475499	0.32285	19	5221	3	80927	GSBRNA2T00009885001,GSBRNA2T00074672001,GSBRNA2T00109670001
GO:BP	activation of immune response	GO:0002253	0.475499	0.32285	2	5221	1	80927	GSBRNA2T00037261001
GO:BP	cotyledon development	GO:0048825	0.475499	0.32285	2	5221	1	80927	GSBRNA2T00101575001
GO:BP	response to carbohydrate	GO:0009743	0.475499	0.32285	2	5221	1	80927	GSBRNA2T00148208001
GO:BP	activation of innate immune response	GO:0002218	0.475499	0.32285	2	5221	1	80927	GSBRNA2T00037261001
GO:BP	polyol metabolic process	GO:0019751	0.475499	0.32285	53	5221	6	80927	GSBRNA2T00068996001,GSBRNA2T00012920001,GSBRNA2T00059432001,GSBRNA2T00137995001,GSBRNA2T00146159001,GSBRNA2T00115928001
GO:BP	steroid biosynthetic process	GO:0006694	0.475499	0.32285	65	5221	7	80927	GSBRNA2T00071250001,GSBRNA2T00028864001,GSBRNA2T00151882001,GSBRNA2T00146049001,GSBRNA2T00081328001,GSBRNA2T00098684001,GSBRNA2T00087438001
GO:BP	positive regulation of immune system process	GO:0002684	0.475499	0.32285	2	5221	1	80927	GSBRNA2T00037261001
GO:BP	cellular response to jasmonic acid stimulus	GO:0071395	0.475499	0.32285	2	5221	1	80927	GSBRNA2T00037261001
GO:BP	response to abiotic stimulus	GO:0009628	0.475499	0.32285	302	5221	25	80927	GSBRNA2T00081585001,GSBRNA2T00082423001,GSBRNA2T00101570001,GSBRNA2T00068982001,GSBRNA2T00095419001,GSBRNA2T00137598001,GSBRNA2T00052025001,GSBRNA2T00005544001,GSBRNA2T00074697001,GSBRNA2T00123748001,GSBRNA2T00134984001,GSBRNA2T00134987001,GSBRNA2T00074020001,GSBRNA2T00014342001,GSBRNA2T00125920001,GSBRNA2T00138944001,GSBRNA2T00115296001,GSBRNA2T00084121001,GSBRNA2T00038611001,GSBRNA2T00120080001…
GO:BP	positive regulation of innate immune response	GO:0045089	0.475499	0.32285	2	5221	1	80927	GSBRNA2T00037261001
GO:BP	response to sucrose	GO:0009744	0.475499	0.32285	2	5221	1	80927	GSBRNA2T00148208001
GO:BP	phosphatidylinositol metabolic process	GO:0046488	0.479173	0.319508	208	5221	18	80927	GSBRNA2T00122075001,GSBRNA2T00021163001,GSBRNA2T00029154001,GSBRNA2T00134675001,GSBRNA2T00051901001,GSBRNA2T00136679001,GSBRNA2T00087068001,GSBRNA2T00089723001,GSBRNA2T00042892001,GSBRNA2T00031941001,GSBRNA2T00151781001,GSBRNA2T00091209001,GSBRNA2T00114846001,GSBRNA2T00064143001,GSBRNA2T00098837001,GSBRNA2T00123325001,GSBRNA2T00087991001,GSBRNA2T00139741001
GO:BP	apocarotenoid biosynthetic process	GO:0043289	0.483652	0.315467	10	5221	2	80927	GSBRNA2T00081585001,GSBRNA2T00115296001
GO:BP	apocarotenoid metabolic process	GO:0043288	0.483652	0.315467	10	5221	2	80927	GSBRNA2T00081585001,GSBRNA2T00115296001
GO:BP	abscisic acid biosynthetic process	GO:0009688	0.483652	0.315467	10	5221	2	80927	GSBRNA2T00081585001,GSBRNA2T00115296001
GO:BP	C-5 methylation of cytosine	GO:0090116	0.483652	0.315467	10	5221	2	80927	GSBRNA2T00000801001,GSBRNA2T00079238001
GO:BP	abscisic acid metabolic process	GO:0009687	0.483652	0.315467	10	5221	2	80927	GSBRNA2T00081585001,GSBRNA2T00115296001
GO:BP	tertiary alcohol biosynthetic process	GO:1902645	0.483652	0.315467	10	5221	2	80927	GSBRNA2T00081585001,GSBRNA2T00115296001
GO:BP	process utilizing autophagic mechanism	GO:0061919	0.483652	0.315467	66	5221	7	80927	GSBRNA2T00134903001,GSBRNA2T00111131001,GSBRNA2T00078561001,GSBRNA2T00027326001,GSBRNA2T00027149001,GSBRNA2T00114867001,GSBRNA2T00153988001
GO:BP	sesquiterpenoid biosynthetic process	GO:0016106	0.483652	0.315467	10	5221	2	80927	GSBRNA2T00081585001,GSBRNA2T00115296001
GO:BP	sesquiterpenoid metabolic process	GO:0006714	0.483652	0.315467	10	5221	2	80927	GSBRNA2T00081585001,GSBRNA2T00115296001
GO:BP	organic hydroxy compound metabolic process	GO:1901615	0.483652	0.315467	169	5221	15	80927	GSBRNA2T00081585001,GSBRNA2T00071250001,GSBRNA2T00068996001,GSBRNA2T00012920001,GSBRNA2T00028864001,GSBRNA2T00059432001,GSBRNA2T00115296001,GSBRNA2T00151882001,GSBRNA2T00137995001,GSBRNA2T00146159001,GSBRNA2T00146049001,GSBRNA2T00081328001,GSBRNA2T00098684001,GSBRNA2T00115928001,GSBRNA2T00087438001
GO:BP	UMP salvage	GO:0044206	0.483652	0.315467	10	5221	2	80927	GSBRNA2T00009885001,GSBRNA2T00074672001
GO:BP	aspartyl-tRNA aminoacylation	GO:0006422	0.483652	0.315467	10	5221	2	80927	GSBRNA2T00123113001,GSBRNA2T00058164001
GO:BP	one-carbon metabolic process	GO:0006730	0.483652	0.315467	42	5221	5	80927	GSBRNA2T00045161001,GSBRNA2T00078636001,GSBRNA2T00049390001,GSBRNA2T00002582001,GSBRNA2T00022029001
GO:BP	regulation of cellular ketone metabolic process	GO:0010565	0.483652	0.315467	10	5221	2	80927	GSBRNA2T00081585001,GSBRNA2T00115296001
GO:BP	autophagy	GO:0006914	0.483652	0.315467	66	5221	7	80927	GSBRNA2T00134903001,GSBRNA2T00111131001,GSBRNA2T00078561001,GSBRNA2T00027326001,GSBRNA2T00027149001,GSBRNA2T00114867001,GSBRNA2T00153988001
GO:BP	tertiary alcohol metabolic process	GO:1902644	0.483652	0.315467	10	5221	2	80927	GSBRNA2T00081585001,GSBRNA2T00115296001
GO:BP	sulfur amino acid biosynthetic process	GO:0000097	0.496553	0.304035	79	5221	8	80927	GSBRNA2T00148905001,GSBRNA2T00154181001,GSBRNA2T00097221001,GSBRNA2T00140873001,GSBRNA2T00094390001,GSBRNA2T00114810001,GSBRNA2T00155874001,GSBRNA2T00109483001
GO:BP	proton transmembrane transport	GO:1902600	0.501268	0.29993	307	5221	25	80927	GSBRNA2T00082423001,GSBRNA2T00068838001,GSBRNA2T00149612001,GSBRNA2T00087845001,GSBRNA2T00080785001,GSBRNA2T00080784001,GSBRNA2T00058454001,GSBRNA2T00132057001,GSBRNA2T00154558001,GSBRNA2T00031172001,GSBRNA2T00113759001,GSBRNA2T00085766001,GSBRNA2T00095419001,GSBRNA2T00000119001,GSBRNA2T00146298001,GSBRNA2T00157534001,GSBRNA2T00038611001,GSBRNA2T00075328001,GSBRNA2T00151907001,GSBRNA2T00119832001…
GO:BP	protein import into nucleus	GO:0006606	0.513129	0.289773	43	5221	5	80927	GSBRNA2T00074538001,GSBRNA2T00035725001,GSBRNA2T00035726001,GSBRNA2T00151695001,GSBRNA2T00150208001
GO:BP	plant-type cell wall organization	GO:0009664	0.527455	0.277814	119	5221	11	80927	GSBRNA2T00131164001,GSBRNA2T00156150001,GSBRNA2T00102695001,GSBRNA2T00090635001,GSBRNA2T00100434001,GSBRNA2T00140476001,GSBRNA2T00151739001,GSBRNA2T00012858001,GSBRNA2T00146119001,GSBRNA2T00093460001,GSBRNA2T00109521001
GO:BP	maintenance of protein location in cell	GO:0032507	0.528612	0.276863	21	5221	3	80927	GSBRNA2T00128203001,GSBRNA2T00076636001,GSBRNA2T00139456001
GO:BP	protein retention in ER lumen	GO:0006621	0.528612	0.276863	21	5221	3	80927	GSBRNA2T00128203001,GSBRNA2T00076636001,GSBRNA2T00139456001
GO:BP	maintenance of protein location	GO:0045185	0.528612	0.276863	21	5221	3	80927	GSBRNA2T00128203001,GSBRNA2T00076636001,GSBRNA2T00139456001
GO:BP	monocarboxylic acid catabolic process	GO:0072329	0.528612	0.276863	21	5221	3	80927	GSBRNA2T00132396001,GSBRNA2T00141865001,GSBRNA2T00134772001
GO:BP	lipid oxidation	GO:0034440	0.528612	0.276863	21	5221	3	80927	GSBRNA2T00132396001,GSBRNA2T00141865001,GSBRNA2T00134772001
GO:BP	pyrimidine nucleotide-sugar transmembrane transport	GO:0090481	0.528612	0.276863	21	5221	3	80927	GSBRNA2T00045085001,GSBRNA2T00139077001,GSBRNA2T00021942001
GO:BP	sodium ion transport	GO:0006814	0.528612	0.276863	32	5221	4	80927	GSBRNA2T00082423001,GSBRNA2T00095419001,GSBRNA2T00038611001,GSBRNA2T00120080001
GO:BP	maintenance of location in cell	GO:0051651	0.528612	0.276863	21	5221	3	80927	GSBRNA2T00128203001,GSBRNA2T00076636001,GSBRNA2T00139456001
GO:BP	maintenance of protein localization in endoplasmic reticulum	GO:0035437	0.528612	0.276863	21	5221	3	80927	GSBRNA2T00128203001,GSBRNA2T00076636001,GSBRNA2T00139456001
GO:BP	fatty acid oxidation	GO:0019395	0.528612	0.276863	21	5221	3	80927	GSBRNA2T00132396001,GSBRNA2T00141865001,GSBRNA2T00134772001
GO:BP	maintenance of protein localization in organelle	GO:0072595	0.528612	0.276863	21	5221	3	80927	GSBRNA2T00128203001,GSBRNA2T00076636001,GSBRNA2T00139456001
GO:BP	lipid modification	GO:0030258	0.529479	0.276151	133	5221	12	80927	GSBRNA2T00122075001,GSBRNA2T00021163001,GSBRNA2T00132396001,GSBRNA2T00141865001,GSBRNA2T00029154001,GSBRNA2T00134772001,GSBRNA2T00134675001,GSBRNA2T00087068001,GSBRNA2T00089723001,GSBRNA2T00031941001,GSBRNA2T00091209001,GSBRNA2T00087991001
GO:BP	protein localization to nucleus	GO:0034504	0.532036	0.274059	44	5221	5	80927	GSBRNA2T00074538001,GSBRNA2T00035725001,GSBRNA2T00035726001,GSBRNA2T00151695001,GSBRNA2T00150208001
GO:BP	pyrimidine nucleotide biosynthetic process	GO:0006221	0.532141	0.273973	94	5221	9	80927	GSBRNA2T00009885001,GSBRNA2T00156878001,GSBRNA2T00031131001,GSBRNA2T00105714001,GSBRNA2T00069045001,GSBRNA2T00074672001,GSBRNA2T00128475001,GSBRNA2T00145935001,GSBRNA2T00109670001
GO:BP	photosystem II stabilization	GO:0042549	0.534158	0.272331	11	5221	2	80927	GSBRNA2T00134966001,GSBRNA2T00109402001
GO:BP	mRNA splice site selection	GO:0006376	0.534158	0.272331	11	5221	2	80927	GSBRNA2T00110169001,GSBRNA2T00018491001
GO:BP	regulation of photosynthesis	GO:0010109	0.534158	0.272331	11	5221	2	80927	GSBRNA2T00134966001,GSBRNA2T00109402001
GO:BP	cytokinesis by cell plate formation	GO:0000911	0.534158	0.272331	11	5221	2	80927	GSBRNA2T00073904001,GSBRNA2T00038614001
GO:BP	regulation of generation of precursor metabolites and energy	GO:0043467	0.534158	0.272331	11	5221	2	80927	GSBRNA2T00134966001,GSBRNA2T00109402001
GO:BP	DNA methylation on cytosine	GO:0032776	0.534158	0.272331	11	5221	2	80927	GSBRNA2T00000801001,GSBRNA2T00079238001
GO:BP	regulation of photosynthesis, light reaction	GO:0042548	0.534158	0.272331	11	5221	2	80927	GSBRNA2T00134966001,GSBRNA2T00109402001
GO:BP	secretion by cell	GO:0032940	0.536955	0.270062	134	5221	12	80927	GSBRNA2T00129956001,GSBRNA2T00135631001,GSBRNA2T00036895001,GSBRNA2T00151527001,GSBRNA2T00015090001,GSBRNA2T00031576001,GSBRNA2T00140363001,GSBRNA2T00151866001,GSBRNA2T00012814001,GSBRNA2T00143345001,GSBRNA2T00099589001,GSBRNA2T00153085001
GO:BP	pyrimidine nucleotide metabolic process	GO:0006220	0.544927	0.263662	95	5221	9	80927	GSBRNA2T00009885001,GSBRNA2T00156878001,GSBRNA2T00031131001,GSBRNA2T00105714001,GSBRNA2T00069045001,GSBRNA2T00074672001,GSBRNA2T00128475001,GSBRNA2T00145935001,GSBRNA2T00109670001
GO:BP	phosphatidylcholine metabolic process	GO:0046470	0.548198	0.261063	33	5221	4	80927	GSBRNA2T00156369001,GSBRNA2T00087615001,GSBRNA2T00101739001,GSBRNA2T00071427001
GO:BP	response to salt stress	GO:0009651	0.548198	0.261063	33	5221	4	80927	GSBRNA2T00082423001,GSBRNA2T00095419001,GSBRNA2T00038611001,GSBRNA2T00120080001
GO:BP	import into nucleus	GO:0051170	0.550745	0.25905	45	5221	5	80927	GSBRNA2T00074538001,GSBRNA2T00035725001,GSBRNA2T00035726001,GSBRNA2T00151695001,GSBRNA2T00150208001
GO:BP	response to osmotic stress	GO:0006970	0.550745	0.25905	45	5221	5	80927	GSBRNA2T00082423001,GSBRNA2T00095419001,GSBRNA2T00074697001,GSBRNA2T00038611001,GSBRNA2T00120080001
GO:BP	pteridine-containing compound metabolic process	GO:0042558	0.55441	0.256169	70	5221	7	80927	GSBRNA2T00134408001,GSBRNA2T00045161001,GSBRNA2T00078636001,GSBRNA2T00027008001,GSBRNA2T00049390001,GSBRNA2T00022029001,GSBRNA2T00039019001
GO:BP	steroid metabolic process	GO:0008202	0.55441	0.256169	70	5221	7	80927	GSBRNA2T00071250001,GSBRNA2T00028864001,GSBRNA2T00151882001,GSBRNA2T00146049001,GSBRNA2T00081328001,GSBRNA2T00098684001,GSBRNA2T00087438001
GO:BP	sperm-egg recognition	GO:0035036	0.56761	0.24595	3	5221	1	80927	GSBRNA2T00109328001
GO:BP	pantothenate metabolic process	GO:0015939	0.56761	0.24595	3	5221	1	80927	GSBRNA2T00155426001
GO:BP	ubiquitin-dependent protein catabolic process via the N-end rule pathway	GO:0071596	0.56761	0.24595	3	5221	1	80927	GSBRNA2T00088793001
GO:BP	response to heat	GO:0009408	0.56761	0.24595	34	5221	4	80927	GSBRNA2T00081585001,GSBRNA2T00068982001,GSBRNA2T00115296001,GSBRNA2T00151751001
GO:BP	fertilization	GO:0009566	0.56761	0.24595	3	5221	1	80927	GSBRNA2T00109328001
GO:BP	arginine biosynthetic process via ornithine	GO:0042450	0.56761	0.24595	3	5221	1	80927	GSBRNA2T00079160001
GO:BP	photosystem II repair	GO:0010206	0.56761	0.24595	3	5221	1	80927	GSBRNA2T00018440001
GO:BP	regulation of cell shape	GO:0008360	0.56761	0.24595	3	5221	1	80927	GSBRNA2T00032758001
GO:BP	negative regulation of transcription by RNA polymerase III	GO:0016480	0.56761	0.24595	3	5221	1	80927	GSBRNA2T00151926001
GO:BP	ribonucleoside catabolic process	GO:0042454	0.56761	0.24595	3	5221	1	80927	GSBRNA2T00002582001
GO:BP	mRNA 5'-splice site recognition	GO:0000395	0.56761	0.24595	3	5221	1	80927	GSBRNA2T00018491001
GO:BP	regulation of lipid biosynthetic process	GO:0046890	0.56761	0.24595	12	5221	2	80927	GSBRNA2T00081585001,GSBRNA2T00115296001
GO:BP	cellulose catabolic process	GO:0030245	0.56761	0.24595	46	5221	5	80927	GSBRNA2T00066233001,GSBRNA2T00048945001,GSBRNA2T00084195001,GSBRNA2T00076643001,GSBRNA2T00018415001
GO:BP	cellular copper ion homeostasis	GO:0006878	0.56761	0.24595	3	5221	1	80927	GSBRNA2T00111677001
GO:BP	purine-containing compound catabolic process	GO:0072523	0.56761	0.24595	3	5221	1	80927	GSBRNA2T00002582001
GO:BP	nucleobase-containing small molecule catabolic process	GO:0034656	0.56761	0.24595	3	5221	1	80927	GSBRNA2T00002582001
GO:BP	actin polymerization or depolymerization	GO:0008154	0.56761	0.24595	59	5221	6	80927	GSBRNA2T00149651001,GSBRNA2T00110258001,GSBRNA2T00050662001,GSBRNA2T00154540001,GSBRNA2T00096127001,GSBRNA2T00052594001
GO:BP	copper ion homeostasis	GO:0055070	0.56761	0.24595	3	5221	1	80927	GSBRNA2T00111677001
GO:BP	single fertilization	GO:0007338	0.56761	0.24595	3	5221	1	80927	GSBRNA2T00109328001
GO:BP	unsaturated fatty acid biosynthetic process	GO:0006636	0.56761	0.24595	3	5221	1	80927	GSBRNA2T00000330001
GO:BP	pantothenate biosynthetic process	GO:0015940	0.56761	0.24595	3	5221	1	80927	GSBRNA2T00155426001
GO:BP	regulation of secondary metabolic process	GO:0043455	0.56761	0.24595	12	5221	2	80927	GSBRNA2T00081585001,GSBRNA2T00115296001
GO:BP	binding of sperm to zona pellucida	GO:0007339	0.56761	0.24595	3	5221	1	80927	GSBRNA2T00109328001
GO:BP	GPI anchor metabolic process	GO:0006505	0.56761	0.24595	72	5221	7	80927	GSBRNA2T00051901001,GSBRNA2T00136679001,GSBRNA2T00151781001,GSBRNA2T00114846001,GSBRNA2T00064143001,GSBRNA2T00123325001,GSBRNA2T00139741001
GO:BP	nucleoside catabolic process	GO:0009164	0.56761	0.24595	3	5221	1	80927	GSBRNA2T00002582001
GO:BP	regulation of transcription by RNA polymerase III	GO:0006359	0.56761	0.24595	3	5221	1	80927	GSBRNA2T00151926001
GO:BP	regulation of development, heterochronic	GO:0040034	0.56761	0.24595	3	5221	1	80927	GSBRNA2T00114181001
GO:BP	cell-cell recognition	GO:0009988	0.56761	0.24595	3	5221	1	80927	GSBRNA2T00109328001
GO:BP	positive regulation of defense response	GO:0031349	0.56761	0.24595	3	5221	1	80927	GSBRNA2T00037261001
GO:BP	beta-glucan catabolic process	GO:0051275	0.56761	0.24595	46	5221	5	80927	GSBRNA2T00066233001,GSBRNA2T00048945001,GSBRNA2T00084195001,GSBRNA2T00076643001,GSBRNA2T00018415001
GO:BP	phosphatidylinositol-mediated signaling	GO:0048015	0.56761	0.24595	12	5221	2	80927	GSBRNA2T00021163001,GSBRNA2T00029154001
GO:BP	unsaturated fatty acid metabolic process	GO:0033559	0.56761	0.24595	3	5221	1	80927	GSBRNA2T00000330001
GO:BP	immune effector process	GO:0002252	0.56761	0.24595	3	5221	1	80927	GSBRNA2T00037261001
GO:BP	protein localization to endoplasmic reticulum	GO:0070972	0.56761	0.24595	72	5221	7	80927	GSBRNA2T00052545001,GSBRNA2T00128203001,GSBRNA2T00062226001,GSBRNA2T00068198001,GSBRNA2T00076636001,GSBRNA2T00021988001,GSBRNA2T00139456001
GO:BP	post-embryonic development	GO:0009791	0.56761	0.24595	179	5221	15	80927	GSBRNA2T00101575001,GSBRNA2T00064199001,GSBRNA2T00137449001,GSBRNA2T00052025001,GSBRNA2T00074697001,GSBRNA2T00124025001,GSBRNA2T00033324001,GSBRNA2T00107612001,GSBRNA2T00151882001,GSBRNA2T00128202001,GSBRNA2T00024664001,GSBRNA2T00146015001,GSBRNA2T00146011001,GSBRNA2T00070205001,GSBRNA2T00018486001
GO:BP	response to stress	GO:0006950	0.567969	0.245675	1207	5221	86	80927	GSBRNA2T00068585001,GSBRNA2T00081585001,GSBRNA2T00052894001,GSBRNA2T00082423001,GSBRNA2T00131028001,GSBRNA2T00088021001,GSBRNA2T00101510001,GSBRNA2T00101570001,GSBRNA2T00009862001,GSBRNA2T00009806001,GSBRNA2T00070991001,GSBRNA2T00144461001,GSBRNA2T00137069001,GSBRNA2T00035751001,GSBRNA2T00065365001,GSBRNA2T00061996001,GSBRNA2T00002269001,GSBRNA2T00068982001,GSBRNA2T00095419001,GSBRNA2T00110278001…
GO:BP	DNA-templated transcription, elongation	GO:0006354	0.567969	0.245675	23	5221	3	80927	GSBRNA2T00009905001,GSBRNA2T00146129001,GSBRNA2T00094562001
GO:BP	macromolecule catabolic process	GO:0009057	0.567969	0.245675	912	5221	66	80927	GSBRNA2T00094600001,GSBRNA2T00005842001,GSBRNA2T00004540001,GSBRNA2T00009823001,GSBRNA2T00037127001,GSBRNA2T00005644001,GSBRNA2T00053984001,GSBRNA2T00154463001,GSBRNA2T00131613001,GSBRNA2T00078816001,GSBRNA2T00151193001,GSBRNA2T00151104001,GSBRNA2T00012561001,GSBRNA2T00117809001,GSBRNA2T00068962001,GSBRNA2T00069044001,GSBRNA2T00095444001,GSBRNA2T00012972001,GSBRNA2T00012984001,GSBRNA2T00105377001…
GO:BP	positive regulation of GTPase activity	GO:0043547	0.575724	0.239786	35	5221	4	80927	GSBRNA2T00000972001,GSBRNA2T00027321001,GSBRNA2T00048973001,GSBRNA2T00029473001
GO:BP	protein peptidyl-prolyl isomerization	GO:0000413	0.575724	0.239786	112	5221	10	80927	GSBRNA2T00120848001,GSBRNA2T00035712001,GSBRNA2T00133275001,GSBRNA2T00063854001,GSBRNA2T00024691001,GSBRNA2T00120139001,GSBRNA2T00105098001,GSBRNA2T00105091001,GSBRNA2T00105092001,GSBRNA2T00043402001
GO:BP	transcription preinitiation complex assembly	GO:0070897	0.575724	0.239786	35	5221	4	80927	GSBRNA2T00133018001,GSBRNA2T00152712001,GSBRNA2T00064742001,GSBRNA2T00064741001
GO:BP	positive regulation of response to stimulus	GO:0048584	0.575724	0.239786	35	5221	4	80927	GSBRNA2T00074558001,GSBRNA2T00069045001,GSBRNA2T00000095001,GSBRNA2T00037261001
GO:BP	peptidyl-proline modification	GO:0018208	0.594845	0.225596	113	5221	10	80927	GSBRNA2T00120848001,GSBRNA2T00035712001,GSBRNA2T00133275001,GSBRNA2T00063854001,GSBRNA2T00024691001,GSBRNA2T00120139001,GSBRNA2T00105098001,GSBRNA2T00105091001,GSBRNA2T00105092001,GSBRNA2T00043402001
GO:BP	cellular modified amino acid metabolic process	GO:0006575	0.604716	0.218449	127	5221	11	80927	GSBRNA2T00134408001,GSBRNA2T00045161001,GSBRNA2T00021856001,GSBRNA2T00078636001,GSBRNA2T00027008001,GSBRNA2T00155426001,GSBRNA2T00049390001,GSBRNA2T00002582001,GSBRNA2T00022029001,GSBRNA2T00039019001,GSBRNA2T00109460001
GO:BP	monocarboxylic acid transport	GO:0015718	0.607425	0.216507	24	5221	3	80927	GSBRNA2T00033287001,GSBRNA2T00091610001,GSBRNA2T00115966001
GO:BP	alpha-amino acid catabolic process	GO:1901606	0.607425	0.216507	61	5221	6	80927	GSBRNA2T00132364001,GSBRNA2T00141888001,GSBRNA2T00105341001,GSBRNA2T00112701001,GSBRNA2T00141267001,GSBRNA2T00002582001
GO:BP	branched-chain amino acid metabolic process	GO:0009081	0.607425	0.216507	61	5221	6	80927	GSBRNA2T00066417001,GSBRNA2T00065403001,GSBRNA2T00047123001,GSBRNA2T00142048001,GSBRNA2T00134985001,GSBRNA2T00012847001
GO:BP	regulation of lipid metabolic process	GO:0019216	0.608672	0.215616	13	5221	2	80927	GSBRNA2T00081585001,GSBRNA2T00115296001
GO:BP	positive regulation of intracellular signal transduction	GO:1902533	0.608672	0.215616	13	5221	2	80927	GSBRNA2T00074558001,GSBRNA2T00000095001
GO:BP	homoserine metabolic process	GO:0009092	0.608672	0.215616	13	5221	2	80927	GSBRNA2T00000139001,GSBRNA2T00155874001
GO:BP	transsulfuration	GO:0019346	0.608672	0.215616	13	5221	2	80927	GSBRNA2T00000139001,GSBRNA2T00155874001
GO:BP	regulation of TOR signaling	GO:0032006	0.608672	0.215616	13	5221	2	80927	GSBRNA2T00074558001,GSBRNA2T00000095001
GO:BP	positive regulation of TOR signaling	GO:0032008	0.608672	0.215616	13	5221	2	80927	GSBRNA2T00074558001,GSBRNA2T00000095001
GO:BP	sucrose biosynthetic process	GO:0005986	0.608672	0.215616	13	5221	2	80927	GSBRNA2T00146970001,GSBRNA2T00077498001
GO:BP	homocysteine metabolic process	GO:0050667	0.608672	0.215616	13	5221	2	80927	GSBRNA2T00000139001,GSBRNA2T00155874001
GO:BP	glycine metabolic process	GO:0006544	0.639352	0.19426	37	5221	4	80927	GSBRNA2T00132364001,GSBRNA2T00141888001,GSBRNA2T00105341001,GSBRNA2T00141267001
GO:BP	ceramide metabolic process	GO:0006672	0.639352	0.19426	37	5221	4	80927	GSBRNA2T00054701001,GSBRNA2T00033553001,GSBRNA2T00079341001,GSBRNA2T00083658001
GO:BP	cellular biogenic amine metabolic process	GO:0006576	0.642811	0.191917	116	5221	10	80927	GSBRNA2T00133973001,GSBRNA2T00130089001,GSBRNA2T00135480001,GSBRNA2T00074511001,GSBRNA2T00157431001,GSBRNA2T00035283001,GSBRNA2T00140522001,GSBRNA2T00093046001,GSBRNA2T00114799001,GSBRNA2T00018448001
GO:BP	floral organ development	GO:0048437	0.643672	0.191335	25	5221	3	80927	GSBRNA2T00137449001,GSBRNA2T00124025001,GSBRNA2T00107612001
GO:BP	glucan catabolic process	GO:0009251	0.645331	0.190217	50	5221	5	80927	GSBRNA2T00066233001,GSBRNA2T00048945001,GSBRNA2T00084195001,GSBRNA2T00076643001,GSBRNA2T00018415001
GO:BP	cellular protein complex disassembly	GO:0043624	0.645331	0.190217	76	5221	7	80927	GSBRNA2T00149651001,GSBRNA2T00110258001,GSBRNA2T00050662001,GSBRNA2T00154540001,GSBRNA2T00096127001,GSBRNA2T00139380001,GSBRNA2T00052594001
GO:BP	organic acid transport	GO:0015849	0.645331	0.190217	76	5221	7	80927	GSBRNA2T00001912001,GSBRNA2T00033287001,GSBRNA2T00091610001,GSBRNA2T00104676001,GSBRNA2T00104678001,GSBRNA2T00115966001,GSBRNA2T00133567001
GO:BP	carboxylic acid transport	GO:0046942	0.645331	0.190217	76	5221	7	80927	GSBRNA2T00001912001,GSBRNA2T00033287001,GSBRNA2T00091610001,GSBRNA2T00104676001,GSBRNA2T00104678001,GSBRNA2T00115966001,GSBRNA2T00133567001
GO:BP	cellular polysaccharide catabolic process	GO:0044247	0.645331	0.190217	50	5221	5	80927	GSBRNA2T00066233001,GSBRNA2T00048945001,GSBRNA2T00084195001,GSBRNA2T00076643001,GSBRNA2T00018415001
GO:BP	cellular amine metabolic process	GO:0044106	0.654468	0.184111	117	5221	10	80927	GSBRNA2T00133973001,GSBRNA2T00130089001,GSBRNA2T00135480001,GSBRNA2T00074511001,GSBRNA2T00157431001,GSBRNA2T00035283001,GSBRNA2T00140522001,GSBRNA2T00093046001,GSBRNA2T00114799001,GSBRNA2T00018448001
GO:BP	peroxisome fission	GO:0016559	0.654468	0.184111	14	5221	2	80927	GSBRNA2T00074919001,GSBRNA2T00149229001
GO:BP	protein autoprocessing	GO:0016540	0.654468	0.184111	4	5221	1	80927	GSBRNA2T00065634001
GO:BP	glyoxylate cycle	GO:0006097	0.654468	0.184111	4	5221	1	80927	GSBRNA2T00078724001
GO:BP	carbohydrate phosphorylation	GO:0046835	0.654468	0.184111	26	5221	3	80927	GSBRNA2T00093561001,GSBRNA2T00120104001,GSBRNA2T00027060001
GO:BP	regulation of GTPase activity	GO:0043087	0.654468	0.184111	38	5221	4	80927	GSBRNA2T00000972001,GSBRNA2T00027321001,GSBRNA2T00048973001,GSBRNA2T00029473001
GO:BP	mitotic DNA replication maintenance of fidelity	GO:1990505	0.654468	0.184111	4	5221	1	80927	GSBRNA2T00094368001
GO:BP	'de novo' L-methionine biosynthetic process	GO:0071266	0.654468	0.184111	4	5221	1	80927	GSBRNA2T00155874001
GO:BP	cold acclimation	GO:0009631	0.654468	0.184111	4	5221	1	80927	GSBRNA2T00143233001
GO:BP	icosanoid biosynthetic process	GO:0046456	0.654468	0.184111	4	5221	1	80927	GSBRNA2T00151899001
GO:BP	leukotriene metabolic process	GO:0006691	0.654468	0.184111	4	5221	1	80927	GSBRNA2T00151899001
GO:BP	mitotic recombination-dependent replication fork processing	GO:1990426	0.654468	0.184111	4	5221	1	80927	GSBRNA2T00094368001
GO:BP	respiratory chain complex IV assembly	GO:0008535	0.654468	0.184111	4	5221	1	80927	GSBRNA2T00111677001
GO:BP	tetrahydrofolate biosynthetic process	GO:0046654	0.654468	0.184111	14	5221	2	80927	GSBRNA2T00027008001,GSBRNA2T00039019001
GO:BP	amine metabolic process	GO:0009308	0.654468	0.184111	174	5221	14	80927	GSBRNA2T00133973001,GSBRNA2T00130089001,GSBRNA2T00135480001,GSBRNA2T00074511001,GSBRNA2T00012900001,GSBRNA2T00157431001,GSBRNA2T00035283001,GSBRNA2T00140522001,GSBRNA2T00151990001,GSBRNA2T00093046001,GSBRNA2T00128444001,GSBRNA2T00145954001,GSBRNA2T00114799001,GSBRNA2T00018448001
GO:BP	proline catabolic process	GO:0006562	0.654468	0.184111	4	5221	1	80927	GSBRNA2T00112701001
GO:BP	glycosyl compound catabolic process	GO:1901658	0.654468	0.184111	4	5221	1	80927	GSBRNA2T00002582001
GO:BP	cell cycle DNA replication maintenance of fidelity	GO:1902298	0.654468	0.184111	4	5221	1	80927	GSBRNA2T00094368001
GO:BP	phosphatidylethanolamine biosynthetic process	GO:0006646	0.654468	0.184111	4	5221	1	80927	GSBRNA2T00065634001
GO:BP	phosphatidylethanolamine metabolic process	GO:0046337	0.654468	0.184111	4	5221	1	80927	GSBRNA2T00065634001
GO:BP	disaccharide metabolic process	GO:0005984	0.654468	0.184111	91	5221	8	80927	GSBRNA2T00118912001,GSBRNA2T00090182001,GSBRNA2T00002805001,GSBRNA2T00147625001,GSBRNA2T00146970001,GSBRNA2T00077498001,GSBRNA2T00038971001,GSBRNA2T00133598001
GO:BP	glyoxylate metabolic process	GO:0046487	0.654468	0.184111	4	5221	1	80927	GSBRNA2T00078724001
GO:BP	aldonic acid metabolic process	GO:0019520	0.654468	0.184111	4	5221	1	80927	GSBRNA2T00032829001
GO:BP	leukotriene biosynthetic process	GO:0019370	0.654468	0.184111	4	5221	1	80927	GSBRNA2T00151899001
GO:BP	D-gluconate metabolic process	GO:0019521	0.654468	0.184111	4	5221	1	80927	GSBRNA2T00032829001
GO:BP	icosanoid metabolic process	GO:0006690	0.654468	0.184111	4	5221	1	80927	GSBRNA2T00151899001
GO:BP	inositol lipid-mediated signaling	GO:0048017	0.654468	0.184111	14	5221	2	80927	GSBRNA2T00021163001,GSBRNA2T00029154001
GO:BP	regulation of microtubule cytoskeleton organization	GO:0070507	0.671997	0.172633	39	5221	4	80927	GSBRNA2T00126733001,GSBRNA2T00094842001,GSBRNA2T00078606001,GSBRNA2T00151747001
GO:BP	protein import	GO:0017038	0.671997	0.172633	92	5221	8	80927	GSBRNA2T00074538001,GSBRNA2T00035725001,GSBRNA2T00035726001,GSBRNA2T00050074001,GSBRNA2T00151695001,GSBRNA2T00032831001,GSBRNA2T00150208001,GSBRNA2T00054368001
GO:BP	sphingolipid metabolic process	GO:0006665	0.671997	0.172633	39	5221	4	80927	GSBRNA2T00054701001,GSBRNA2T00033553001,GSBRNA2T00079341001,GSBRNA2T00083658001
GO:BP	cellular amino acid catabolic process	GO:0009063	0.671997	0.172633	65	5221	6	80927	GSBRNA2T00132364001,GSBRNA2T00141888001,GSBRNA2T00105341001,GSBRNA2T00112701001,GSBRNA2T00141267001,GSBRNA2T00002582001
GO:BP	cortical microtubule organization	GO:0043622	0.693445	0.158988	15	5221	2	80927	GSBRNA2T00147458001,GSBRNA2T00151740001
GO:BP	protein repair	GO:0030091	0.693445	0.158988	15	5221	2	80927	GSBRNA2T00138232001,GSBRNA2T00018440001
GO:BP	cortical cytoskeleton organization	GO:0030865	0.693445	0.158988	15	5221	2	80927	GSBRNA2T00147458001,GSBRNA2T00151740001
GO:BP	plant-type secondary cell wall biogenesis	GO:0009834	0.693445	0.158988	15	5221	2	80927	GSBRNA2T00130716001,GSBRNA2T00121223001
GO:BP	phospholipid biosynthetic process	GO:0008654	0.710754	0.148281	192	5221	15	80927	GSBRNA2T00156369001,GSBRNA2T00101739001,GSBRNA2T00068996001,GSBRNA2T00028864001,GSBRNA2T00051901001,GSBRNA2T00136679001,GSBRNA2T00024782001,GSBRNA2T00042892001,GSBRNA2T00151781001,GSBRNA2T00071427001,GSBRNA2T00063088001,GSBRNA2T00064143001,GSBRNA2T00065634001,GSBRNA2T00123325001,GSBRNA2T00139741001
GO:BP	xenobiotic transport	GO:0042908	0.714378	0.146072	94	5221	8	80927	GSBRNA2T00067996001,GSBRNA2T00069011001,GSBRNA2T00015249001,GSBRNA2T00037405001,GSBRNA2T00078061001,GSBRNA2T00062210001,GSBRNA2T00068180001,GSBRNA2T00002627001
GO:BP	pyrimidine-containing compound biosynthetic process	GO:0072528	0.719288	0.143097	122	5221	10	80927	GSBRNA2T00009885001,GSBRNA2T00072696001,GSBRNA2T00156878001,GSBRNA2T00031131001,GSBRNA2T00105714001,GSBRNA2T00069045001,GSBRNA2T00074672001,GSBRNA2T00128475001,GSBRNA2T00145935001,GSBRNA2T00109670001
GO:BP	glycolipid biosynthetic process	GO:0009247	0.7309	0.136142	81	5221	7	80927	GSBRNA2T00135015001,GSBRNA2T00051901001,GSBRNA2T00136679001,GSBRNA2T00151781001,GSBRNA2T00064143001,GSBRNA2T00123325001,GSBRNA2T00139741001
GO:BP	glycolipid metabolic process	GO:0006664	0.731752	0.135636	95	5221	8	80927	GSBRNA2T00135015001,GSBRNA2T00051901001,GSBRNA2T00136679001,GSBRNA2T00151781001,GSBRNA2T00114846001,GSBRNA2T00064143001,GSBRNA2T00123325001,GSBRNA2T00139741001
GO:BP	liposaccharide metabolic process	GO:1903509	0.731752	0.135636	95	5221	8	80927	GSBRNA2T00135015001,GSBRNA2T00051901001,GSBRNA2T00136679001,GSBRNA2T00151781001,GSBRNA2T00114846001,GSBRNA2T00064143001,GSBRNA2T00123325001,GSBRNA2T00139741001
GO:BP	tricarboxylic acid metabolic process	GO:0072350	0.731752	0.135636	28	5221	3	80927	GSBRNA2T00075173001,GSBRNA2T00157431001,GSBRNA2T00149169001
GO:BP	retrograde vesicle-mediated transport, Golgi to endoplasmic reticulum	GO:0006890	0.731752	0.135636	28	5221	3	80927	GSBRNA2T00132353001,GSBRNA2T00141895001,GSBRNA2T00125144001
GO:BP	regulation of autophagy	GO:0010506	0.732034	0.135468	5	5221	1	80927	GSBRNA2T00111131001
GO:BP	protein-containing complex disassembly	GO:0032984	0.732034	0.135468	82	5221	7	80927	GSBRNA2T00149651001,GSBRNA2T00110258001,GSBRNA2T00050662001,GSBRNA2T00154540001,GSBRNA2T00096127001,GSBRNA2T00139380001,GSBRNA2T00052594001
GO:BP	protein N-linked glycosylation via asparagine	GO:0018279	0.732034	0.135468	5	5221	1	80927	GSBRNA2T00134949001
GO:BP	isopentenyl diphosphate biosynthetic process, mevalonate pathway	GO:0019287	0.732034	0.135468	5	5221	1	80927	GSBRNA2T00028864001
GO:BP	leucine metabolic process	GO:0006551	0.732034	0.135468	16	5221	2	80927	GSBRNA2T00066417001,GSBRNA2T00134985001
GO:BP	peptidyl-asparagine modification	GO:0018196	0.732034	0.135468	5	5221	1	80927	GSBRNA2T00134949001
GO:BP	ornithine metabolic process	GO:0006591	0.732034	0.135468	5	5221	1	80927	GSBRNA2T00079160001
GO:BP	cellular response to carbon dioxide	GO:0071244	0.732034	0.135468	5	5221	1	80927	GSBRNA2T00115838001
GO:BP	GPI anchor biosynthetic process	GO:0006506	0.732034	0.135468	68	5221	6	80927	GSBRNA2T00051901001,GSBRNA2T00136679001,GSBRNA2T00151781001,GSBRNA2T00064143001,GSBRNA2T00123325001,GSBRNA2T00139741001
GO:BP	peptidyl-pyrromethane cofactor linkage	GO:0018160	0.732034	0.135468	5	5221	1	80927	GSBRNA2T00080761001
GO:BP	leaf morphogenesis	GO:0009965	0.732034	0.135468	5	5221	1	80927	GSBRNA2T00114181001
GO:BP	response to jasmonic acid	GO:0009753	0.732034	0.135468	5	5221	1	80927	GSBRNA2T00037261001
GO:BP	response to carbon dioxide	GO:0010037	0.732034	0.135468	5	5221	1	80927	GSBRNA2T00115838001
GO:BP	carbohydrate transport	GO:0008643	0.732034	0.135468	55	5221	5	80927	GSBRNA2T00137296001,GSBRNA2T00036831001,GSBRNA2T00062677001,GSBRNA2T00080498001,GSBRNA2T00116464001
GO:BP	regulation of microtubule polymerization or depolymerization	GO:0031110	0.732034	0.135468	16	5221	2	80927	GSBRNA2T00094842001,GSBRNA2T00078606001
GO:BP	positive regulation of microtubule polymerization or depolymerization	GO:0031112	0.732034	0.135468	16	5221	2	80927	GSBRNA2T00094842001,GSBRNA2T00078606001
GO:BP	regulation of microtubule polymerization	GO:0031113	0.732034	0.135468	16	5221	2	80927	GSBRNA2T00094842001,GSBRNA2T00078606001
GO:BP	seedling development	GO:0090351	0.732034	0.135468	5	5221	1	80927	GSBRNA2T00074697001
GO:BP	positive regulation of microtubule polymerization	GO:0031116	0.732034	0.135468	16	5221	2	80927	GSBRNA2T00094842001,GSBRNA2T00078606001
GO:BP	embryo development	GO:0009790	0.732034	0.135468	16	5221	2	80927	GSBRNA2T00101575001,GSBRNA2T00151882001
GO:BP	leucine biosynthetic process	GO:0009098	0.732034	0.135468	16	5221	2	80927	GSBRNA2T00066417001,GSBRNA2T00134985001
GO:BP	cellular catabolic process	GO:0044248	0.732034	0.135468	1051	5221	73	80927	GSBRNA2T00004540001,GSBRNA2T00131028001,GSBRNA2T00009862001,GSBRNA2T00037127001,GSBRNA2T00005644001,GSBRNA2T00061996001,GSBRNA2T00131613001,GSBRNA2T00132396001,GSBRNA2T00132364001,GSBRNA2T00117809001,GSBRNA2T00069044001,GSBRNA2T00021856001,GSBRNA2T00141865001,GSBRNA2T00141888001,GSBRNA2T00012920001,GSBRNA2T00105341001,GSBRNA2T00105377001,GSBRNA2T00116916001,GSBRNA2T00051670001,GSBRNA2T00155307001…
GO:BP	positive regulation of microtubule nucleation	GO:0090063	0.732034	0.135468	16	5221	2	80927	GSBRNA2T00094842001,GSBRNA2T00078606001
GO:BP	seed germination	GO:0009845	0.732034	0.135468	5	5221	1	80927	GSBRNA2T00074697001
GO:BP	membrane lipid biosynthetic process	GO:0046467	0.732034	0.135468	82	5221	7	80927	GSBRNA2T00135015001,GSBRNA2T00051901001,GSBRNA2T00136679001,GSBRNA2T00151781001,GSBRNA2T00064143001,GSBRNA2T00123325001,GSBRNA2T00139741001
GO:BP	regulation of microtubule nucleation	GO:0010968	0.732034	0.135468	16	5221	2	80927	GSBRNA2T00094842001,GSBRNA2T00078606001
GO:BP	protein transport by the Tat complex	GO:0043953	0.732034	0.135468	5	5221	1	80927	GSBRNA2T00109501001
GO:BP	embryo development ending in seed dormancy	GO:0009793	0.732034	0.135468	16	5221	2	80927	GSBRNA2T00101575001,GSBRNA2T00151882001
GO:BP	positive regulation of hydrolase activity	GO:0051345	0.734204	0.134183	42	5221	4	80927	GSBRNA2T00000972001,GSBRNA2T00027321001,GSBRNA2T00048973001,GSBRNA2T00029473001
GO:BP	DNA metabolic process	GO:0006259	0.734204	0.134183	548	5221	39	80927	GSBRNA2T00134310001,GSBRNA2T00130420001,GSBRNA2T00070991001,GSBRNA2T00000801001,GSBRNA2T00058175001,GSBRNA2T00144461001,GSBRNA2T00065365001,GSBRNA2T00131613001,GSBRNA2T00040186001,GSBRNA2T00013005001,GSBRNA2T00105445001,GSBRNA2T00105501001,GSBRNA2T00030790001,GSBRNA2T00068464001,GSBRNA2T00129222001,GSBRNA2T00129306001,GSBRNA2T00063471001,GSBRNA2T00134692001,GSBRNA2T00134994001,GSBRNA2T00157382001…
GO:BP	mitochondrion organization	GO:0007005	0.734204	0.134183	139	5221	11	80927	GSBRNA2T00130293001,GSBRNA2T00065345001,GSBRNA2T00050074001,GSBRNA2T00032831001,GSBRNA2T00034922001,GSBRNA2T00115267001,GSBRNA2T00151962001,GSBRNA2T00002974001,GSBRNA2T00054368001,GSBRNA2T00076130001,GSBRNA2T00109448001
GO:BP	pyrimidine-containing compound metabolic process	GO:0072527	0.735874	0.133197	125	5221	10	80927	GSBRNA2T00009885001,GSBRNA2T00072696001,GSBRNA2T00156878001,GSBRNA2T00031131001,GSBRNA2T00105714001,GSBRNA2T00069045001,GSBRNA2T00074672001,GSBRNA2T00128475001,GSBRNA2T00145935001,GSBRNA2T00109670001
GO:BP	phosphatidylinositol biosynthetic process	GO:0006661	0.735874	0.133197	83	5221	7	80927	GSBRNA2T00051901001,GSBRNA2T00136679001,GSBRNA2T00042892001,GSBRNA2T00151781001,GSBRNA2T00064143001,GSBRNA2T00123325001,GSBRNA2T00139741001
GO:BP	alcohol metabolic process	GO:0006066	0.735874	0.133197	97	5221	8	80927	GSBRNA2T00081585001,GSBRNA2T00068996001,GSBRNA2T00012920001,GSBRNA2T00059432001,GSBRNA2T00115296001,GSBRNA2T00137995001,GSBRNA2T00146159001,GSBRNA2T00115928001
GO:BP	dicarboxylic acid metabolic process	GO:0043648	0.735874	0.133197	111	5221	9	80927	GSBRNA2T00144509001,GSBRNA2T00094857001,GSBRNA2T00101770001,GSBRNA2T00069052001,GSBRNA2T00086345001,GSBRNA2T00093890001,GSBRNA2T00071966001,GSBRNA2T00153857001,GSBRNA2T00101955001
GO:BP	regulation of response to stimulus	GO:0048583	0.747994	0.126102	140	5221	11	80927	GSBRNA2T00130922001,GSBRNA2T00074558001,GSBRNA2T00069045001,GSBRNA2T00068982001,GSBRNA2T00154295001,GSBRNA2T00052025001,GSBRNA2T00000095001,GSBRNA2T00037261001,GSBRNA2T00025408001,GSBRNA2T00071535001,GSBRNA2T00121396001
GO:BP	tetrahydrofolate metabolic process	GO:0046653	0.748127	0.126025	43	5221	4	80927	GSBRNA2T00045161001,GSBRNA2T00027008001,GSBRNA2T00022029001,GSBRNA2T00039019001
GO:BP	regulation of small molecule metabolic process	GO:0062012	0.748127	0.126025	17	5221	2	80927	GSBRNA2T00081585001,GSBRNA2T00115296001
GO:BP	UMP metabolic process	GO:0046049	0.748127	0.126025	17	5221	2	80927	GSBRNA2T00009885001,GSBRNA2T00074672001
GO:BP	pyrimidine ribonucleoside monophosphate biosynthetic process	GO:0009174	0.748127	0.126025	17	5221	2	80927	GSBRNA2T00009885001,GSBRNA2T00074672001
GO:BP	pyrimidine ribonucleoside monophosphate metabolic process	GO:0009173	0.748127	0.126025	17	5221	2	80927	GSBRNA2T00009885001,GSBRNA2T00074672001
GO:BP	photoperiodism, flowering	GO:0048573	0.748127	0.126025	17	5221	2	80927	GSBRNA2T00052025001,GSBRNA2T00128202001
GO:BP	sulfur compound metabolic process	GO:0006790	0.748127	0.126025	315	5221	23	80927	GSBRNA2T00135480001,GSBRNA2T00131689001,GSBRNA2T00045161001,GSBRNA2T00148905001,GSBRNA2T00021856001,GSBRNA2T00154181001,GSBRNA2T00127321001,GSBRNA2T00028864001,GSBRNA2T00000139001,GSBRNA2T00134675001,GSBRNA2T00035283001,GSBRNA2T00097221001,GSBRNA2T00140522001,GSBRNA2T00140873001,GSBRNA2T00094390001,GSBRNA2T00114810001,GSBRNA2T00155874001,GSBRNA2T00002582001,GSBRNA2T00022029001,GSBRNA2T00018500001…
GO:BP	UMP biosynthetic process	GO:0006222	0.748127	0.126025	17	5221	2	80927	GSBRNA2T00009885001,GSBRNA2T00074672001
GO:BP	cytoplasmic microtubule organization	GO:0031122	0.748127	0.126025	17	5221	2	80927	GSBRNA2T00147458001,GSBRNA2T00151740001
GO:BP	nucleoside transport	GO:0015858	0.748127	0.126025	43	5221	4	80927	GSBRNA2T00092248001,GSBRNA2T00083659001,GSBRNA2T00085896001,GSBRNA2T00085897001
GO:BP	chromatin remodeling	GO:0006338	0.748127	0.126025	43	5221	4	80927	GSBRNA2T00074697001,GSBRNA2T00134908001,GSBRNA2T00114734001,GSBRNA2T00149038001
GO:BP	photosystem II assembly	GO:0010207	0.748127	0.126025	17	5221	2	80927	GSBRNA2T00134966001,GSBRNA2T00109402001
GO:BP	nucleoside transmembrane transport	GO:1901642	0.748127	0.126025	43	5221	4	80927	GSBRNA2T00092248001,GSBRNA2T00083659001,GSBRNA2T00085896001,GSBRNA2T00085897001
GO:BP	photoperiodism	GO:0009648	0.748127	0.126025	17	5221	2	80927	GSBRNA2T00052025001,GSBRNA2T00128202001
GO:BP	seed development	GO:0048316	0.756276	0.12132	30	5221	3	80927	GSBRNA2T00101575001,GSBRNA2T00151882001,GSBRNA2T00070205001
GO:BP	sulfate transmembrane transport	GO:1902358	0.756276	0.12132	30	5221	3	80927	GSBRNA2T00081088001,GSBRNA2T00015696001,GSBRNA2T00018454001
GO:BP	reproductive process	GO:0022414	0.76272	0.117635	302	5221	22	80927	GSBRNA2T00101575001,GSBRNA2T00095233001,GSBRNA2T00131588001,GSBRNA2T00060148001,GSBRNA2T00137449001,GSBRNA2T00052025001,GSBRNA2T00074697001,GSBRNA2T00124025001,GSBRNA2T00033324001,GSBRNA2T00057109001,GSBRNA2T00107612001,GSBRNA2T00109328001,GSBRNA2T00151882001,GSBRNA2T00128202001,GSBRNA2T00024664001,GSBRNA2T00146015001,GSBRNA2T00146011001,GSBRNA2T00070205001,GSBRNA2T00102191001,GSBRNA2T00102188001…
GO:BP	reproduction	GO:0000003	0.76272	0.117635	302	5221	22	80927	GSBRNA2T00101575001,GSBRNA2T00095233001,GSBRNA2T00131588001,GSBRNA2T00060148001,GSBRNA2T00137449001,GSBRNA2T00052025001,GSBRNA2T00074697001,GSBRNA2T00124025001,GSBRNA2T00033324001,GSBRNA2T00057109001,GSBRNA2T00107612001,GSBRNA2T00109328001,GSBRNA2T00151882001,GSBRNA2T00128202001,GSBRNA2T00024664001,GSBRNA2T00146015001,GSBRNA2T00146011001,GSBRNA2T00070205001,GSBRNA2T00102191001,GSBRNA2T00102188001…
GO:BP	sulfur compound biosynthetic process	GO:0044272	0.767051	0.115176	171	5221	13	80927	GSBRNA2T00135480001,GSBRNA2T00148905001,GSBRNA2T00154181001,GSBRNA2T00035283001,GSBRNA2T00097221001,GSBRNA2T00140522001,GSBRNA2T00140873001,GSBRNA2T00094390001,GSBRNA2T00114810001,GSBRNA2T00155874001,GSBRNA2T00018367001,GSBRNA2T00109460001,GSBRNA2T00109483001
GO:BP	regulation of biological process	GO:0050789	0.775074	0.110657	5777	5221	381	80927	GSBRNA2T00068585001,GSBRNA2T00134310001,GSBRNA2T00134581001,GSBRNA2T00081585001,GSBRNA2T00083129001,GSBRNA2T00126266001,GSBRNA2T00111677001,GSBRNA2T00026805001,GSBRNA2T00026833001,GSBRNA2T00042253001,GSBRNA2T00054057001,GSBRNA2T00071333001,GSBRNA2T00044326001,GSBRNA2T00044371001,GSBRNA2T00085609001,GSBRNA2T00104998001,GSBRNA2T00149561001,GSBRNA2T00149587001,GSBRNA2T00073188001,GSBRNA2T00130984001…
GO:BP	vegetative to reproductive phase transition of meristem	GO:0010228	0.775074	0.110657	18	5221	2	80927	GSBRNA2T00052025001,GSBRNA2T00128202001
GO:BP	fruit development	GO:0010154	0.775074	0.110657	31	5221	3	80927	GSBRNA2T00101575001,GSBRNA2T00151882001,GSBRNA2T00070205001
GO:BP	cellular oxidant detoxification	GO:0098869	0.775074	0.110657	203	5221	15	80927	GSBRNA2T00052894001,GSBRNA2T00088021001,GSBRNA2T00009862001,GSBRNA2T00118837001,GSBRNA2T00035751001,GSBRNA2T00061996001,GSBRNA2T00051670001,GSBRNA2T00000056001,GSBRNA2T00043214001,GSBRNA2T00093204001,GSBRNA2T00056539001,GSBRNA2T00031244001,GSBRNA2T00065523001,GSBRNA2T00052685001,GSBRNA2T00066683001
GO:BP	nucleoside metabolic process	GO:0009116	0.775074	0.110657	115	5221	9	80927	GSBRNA2T00051772001,GSBRNA2T00009885001,GSBRNA2T00135480001,GSBRNA2T00074672001,GSBRNA2T00035283001,GSBRNA2T00140522001,GSBRNA2T00143476001,GSBRNA2T00002582001,GSBRNA2T00109670001
GO:BP	potassium ion transport	GO:0006813	0.775074	0.110657	100	5221	8	80927	GSBRNA2T00057927001,GSBRNA2T00031651001,GSBRNA2T00145542001,GSBRNA2T00145543001,GSBRNA2T00145544001,GSBRNA2T00151780001,GSBRNA2T00018366001,GSBRNA2T00054207001
GO:BP	(1->3)-beta-D-glucan metabolic process	GO:0006074	0.775074	0.110657	31	5221	3	80927	GSBRNA2T00135036001,GSBRNA2T00151945001,GSBRNA2T00091303001
GO:BP	fucose metabolic process	GO:0006004	0.775074	0.110657	58	5221	5	80927	GSBRNA2T00089834001,GSBRNA2T00037070001,GSBRNA2T00055135001,GSBRNA2T00009230001,GSBRNA2T00095843001
GO:BP	tRNA aminoacylation for protein translation	GO:0006418	0.775074	0.110657	188	5221	14	80927	GSBRNA2T00005823001,GSBRNA2T00123113001,GSBRNA2T00120631001,GSBRNA2T00110274001,GSBRNA2T00058164001,GSBRNA2T00060848001,GSBRNA2T00106811001,GSBRNA2T00150673001,GSBRNA2T00044557001,GSBRNA2T00145926001,GSBRNA2T00145910001,GSBRNA2T00077486001,GSBRNA2T00015284001,GSBRNA2T00109450001
GO:BP	regulation of cell morphogenesis	GO:0022604	0.775074	0.110657	18	5221	2	80927	GSBRNA2T00032758001,GSBRNA2T00151742001
GO:BP	phosphatidylinositol phosphorylation	GO:0046854	0.775074	0.110657	59	5221	5	80927	GSBRNA2T00021163001,GSBRNA2T00029154001,GSBRNA2T00134675001,GSBRNA2T00091209001,GSBRNA2T00087991001
GO:BP	isoleucyl-tRNA aminoacylation	GO:0006428	0.775074	0.110657	6	5221	1	80927	GSBRNA2T00120631001
GO:BP	phospholipid dephosphorylation	GO:0046839	0.775074	0.110657	45	5221	4	80927	GSBRNA2T00122075001,GSBRNA2T00087068001,GSBRNA2T00089723001,GSBRNA2T00031941001
GO:BP	inositol phosphate biosynthetic process	GO:0032958	0.775074	0.110657	6	5221	1	80927	GSBRNA2T00146159001
GO:BP	regulation of cellular response to heat	GO:1900034	0.775074	0.110657	6	5221	1	80927	GSBRNA2T00068982001
GO:BP	purine-containing compound transmembrane transport	GO:0072530	0.775074	0.110657	31	5221	3	80927	GSBRNA2T00083659001,GSBRNA2T00085896001,GSBRNA2T00085897001
GO:BP	cotranslational protein targeting to membrane	GO:0006613	0.775074	0.110657	45	5221	4	80927	GSBRNA2T00052545001,GSBRNA2T00062226001,GSBRNA2T00068198001,GSBRNA2T00021988001
GO:BP	lipid phosphorylation	GO:0046834	0.775074	0.110657	59	5221	5	80927	GSBRNA2T00021163001,GSBRNA2T00029154001,GSBRNA2T00134675001,GSBRNA2T00091209001,GSBRNA2T00087991001
GO:BP	SRP-dependent cotranslational protein targeting to membrane	GO:0006614	0.775074	0.110657	45	5221	4	80927	GSBRNA2T00052545001,GSBRNA2T00062226001,GSBRNA2T00068198001,GSBRNA2T00021988001
GO:BP	mitotic DNA replication	GO:1902969	0.775074	0.110657	6	5221	1	80927	GSBRNA2T00094368001
GO:BP	pathogenesis	GO:0009405	0.775074	0.110657	18	5221	2	80927	GSBRNA2T00002269001,GSBRNA2T00021980001
GO:BP	system development	GO:0048731	0.775074	0.110657	216	5221	16	80927	GSBRNA2T00130502001,GSBRNA2T00101575001,GSBRNA2T00114181001,GSBRNA2T00137449001,GSBRNA2T00052025001,GSBRNA2T00074697001,GSBRNA2T00124025001,GSBRNA2T00033324001,GSBRNA2T00107612001,GSBRNA2T00151882001,GSBRNA2T00128202001,GSBRNA2T00024664001,GSBRNA2T00146015001,GSBRNA2T00146011001,GSBRNA2T00070205001,GSBRNA2T00018486001
GO:BP	regulation of protein complex stability	GO:0061635	0.775074	0.110657	6	5221	1	80927	GSBRNA2T00078590001
GO:BP	lipoprotein biosynthetic process	GO:0042158	0.775074	0.110657	73	5221	6	80927	GSBRNA2T00051901001,GSBRNA2T00136679001,GSBRNA2T00151781001,GSBRNA2T00064143001,GSBRNA2T00123325001,GSBRNA2T00139741001
GO:BP	phosphatidylinositol dephosphorylation	GO:0046856	0.775074	0.110657	45	5221	4	80927	GSBRNA2T00122075001,GSBRNA2T00087068001,GSBRNA2T00089723001,GSBRNA2T00031941001
GO:BP	defense response to bacterium	GO:0042742	0.775074	0.110657	18	5221	2	80927	GSBRNA2T00037261001,GSBRNA2T00109484001
GO:BP	(1->3)-beta-D-glucan biosynthetic process	GO:0006075	0.775074	0.110657	31	5221	3	80927	GSBRNA2T00135036001,GSBRNA2T00151945001,GSBRNA2T00091303001
GO:BP	cell cycle DNA replication	GO:0044786	0.775074	0.110657	59	5221	5	80927	GSBRNA2T00116951001,GSBRNA2T00155346001,GSBRNA2T00152670001,GSBRNA2T00078704001,GSBRNA2T00094368001
GO:BP	protein lipidation	GO:0006497	0.775074	0.110657	73	5221	6	80927	GSBRNA2T00051901001,GSBRNA2T00136679001,GSBRNA2T00151781001,GSBRNA2T00064143001,GSBRNA2T00123325001,GSBRNA2T00139741001
GO:BP	regulation of microtubule-based process	GO:0032886	0.775074	0.110657	45	5221	4	80927	GSBRNA2T00126733001,GSBRNA2T00094842001,GSBRNA2T00078606001,GSBRNA2T00151747001
GO:BP	nuclear DNA replication	GO:0033260	0.775074	0.110657	6	5221	1	80927	GSBRNA2T00094368001
GO:BP	purine nucleoside transmembrane transport	GO:0015860	0.775074	0.110657	31	5221	3	80927	GSBRNA2T00083659001,GSBRNA2T00085896001,GSBRNA2T00085897001
GO:BP	TOR signaling	GO:0031929	0.775074	0.110657	18	5221	2	80927	GSBRNA2T00074558001,GSBRNA2T00000095001
GO:BP	animal organ development	GO:0048513	0.775074	0.110657	6	5221	1	80927	GSBRNA2T00130502001
GO:BP	regulation of flower development	GO:0009909	0.795391	0.0994193	32	5221	3	80927	GSBRNA2T00074697001,GSBRNA2T00146015001,GSBRNA2T00146011001
GO:BP	ubiquinone metabolic process	GO:0006743	0.800368	0.0967104	19	5221	2	80927	GSBRNA2T00079573001,GSBRNA2T00014764001
GO:BP	response to bacterium	GO:0009617	0.800368	0.0967104	19	5221	2	80927	GSBRNA2T00037261001,GSBRNA2T00109484001
GO:BP	base-excision repair	GO:0006284	0.800368	0.0967104	46	5221	4	80927	GSBRNA2T00105501001,GSBRNA2T00068464001,GSBRNA2T00129222001,GSBRNA2T00153973001
GO:BP	ubiquinone biosynthetic process	GO:0006744	0.800368	0.0967104	19	5221	2	80927	GSBRNA2T00079573001,GSBRNA2T00014764001
GO:BP	microtubule polymerization	GO:0046785	0.800368	0.0967104	19	5221	2	80927	GSBRNA2T00094842001,GSBRNA2T00078606001
GO:BP	regulation of anatomical structure morphogenesis	GO:0022603	0.800368	0.0967104	19	5221	2	80927	GSBRNA2T00032758001,GSBRNA2T00151742001
GO:BP	sister chromatid cohesion	GO:0007062	0.800368	0.0967104	60	5221	5	80927	GSBRNA2T00136259001,GSBRNA2T00106946001,GSBRNA2T00071122001,GSBRNA2T00099180001,GSBRNA2T00154913001
GO:BP	microtubule nucleation	GO:0007020	0.800368	0.0967104	19	5221	2	80927	GSBRNA2T00094842001,GSBRNA2T00078606001
GO:BP	amino acid transport	GO:0006865	0.800368	0.0967104	19	5221	2	80927	GSBRNA2T00001912001,GSBRNA2T00133567001
GO:BP	microtubule polymerization or depolymerization	GO:0031109	0.800368	0.0967104	19	5221	2	80927	GSBRNA2T00094842001,GSBRNA2T00078606001
GO:BP	cellular response to inorganic substance	GO:0071241	0.800368	0.0967104	19	5221	2	80927	GSBRNA2T00074877001,GSBRNA2T00115838001
GO:BP	cellular response to stress	GO:0033554	0.801135	0.0962944	459	5221	32	80927	GSBRNA2T00101510001,GSBRNA2T00070991001,GSBRNA2T00144461001,GSBRNA2T00035751001,GSBRNA2T00065365001,GSBRNA2T00068982001,GSBRNA2T00040186001,GSBRNA2T00105445001,GSBRNA2T00105501001,GSBRNA2T00037342001,GSBRNA2T00068464001,GSBRNA2T00129222001,GSBRNA2T00129306001,GSBRNA2T00134692001,GSBRNA2T00134994001,GSBRNA2T00081387001,GSBRNA2T00078557001,GSBRNA2T00138970001,GSBRNA2T00109297001,GSBRNA2T00094368001…
GO:BP	generation of precursor metabolites and energy	GO:0006091	0.801135	0.0962944	760	5221	52	80927	GSBRNA2T00104838001,GSBRNA2T00009894001,GSBRNA2T00009877001,GSBRNA2T00009892001,GSBRNA2T00073303001,GSBRNA2T00117989001,GSBRNA2T00093561001,GSBRNA2T00073230001,GSBRNA2T00021893001,GSBRNA2T00005555001,GSBRNA2T00076226001,GSBRNA2T00123751001,GSBRNA2T00095036001,GSBRNA2T00063873001,GSBRNA2T00040383001,GSBRNA2T00106160001,GSBRNA2T00146469001,GSBRNA2T00010065001,GSBRNA2T00134657001,GSBRNA2T00134832001…
GO:BP	purine ribonucleoside metabolic process	GO:0046128	0.801325	0.0961912	47	5221	4	80927	GSBRNA2T00135480001,GSBRNA2T00035283001,GSBRNA2T00140522001,GSBRNA2T00002582001
GO:BP	glycosyl compound metabolic process	GO:1901657	0.801325	0.0961912	119	5221	9	80927	GSBRNA2T00051772001,GSBRNA2T00009885001,GSBRNA2T00135480001,GSBRNA2T00074672001,GSBRNA2T00035283001,GSBRNA2T00140522001,GSBRNA2T00143476001,GSBRNA2T00002582001,GSBRNA2T00109670001
GO:BP	cellular detoxification	GO:1990748	0.801325	0.0961912	207	5221	15	80927	GSBRNA2T00052894001,GSBRNA2T00088021001,GSBRNA2T00009862001,GSBRNA2T00118837001,GSBRNA2T00035751001,GSBRNA2T00061996001,GSBRNA2T00051670001,GSBRNA2T00000056001,GSBRNA2T00043214001,GSBRNA2T00093204001,GSBRNA2T00056539001,GSBRNA2T00031244001,GSBRNA2T00065523001,GSBRNA2T00052685001,GSBRNA2T00066683001
GO:BP	regulation of DNA endoreduplication	GO:0032875	0.801325	0.0961912	48	5221	4	80927	GSBRNA2T00116951001,GSBRNA2T00155346001,GSBRNA2T00152670001,GSBRNA2T00078704001
GO:BP	imidazole-containing compound metabolic process	GO:0052803	0.801325	0.0961912	34	5221	3	80927	GSBRNA2T00134667001,GSBRNA2T00100431001,GSBRNA2T00061333001
GO:BP	lipoprotein metabolic process	GO:0042157	0.801325	0.0961912	76	5221	6	80927	GSBRNA2T00051901001,GSBRNA2T00136679001,GSBRNA2T00151781001,GSBRNA2T00064143001,GSBRNA2T00123325001,GSBRNA2T00139741001
GO:BP	cellular response to heat	GO:0034605	0.801325	0.0961912	7	5221	1	80927	GSBRNA2T00068982001
GO:BP	cellular metabolic compound salvage	GO:0043094	0.801325	0.0961912	61	5221	5	80927	GSBRNA2T00009885001,GSBRNA2T00074672001,GSBRNA2T00143476001,GSBRNA2T00098486001,GSBRNA2T00109670001
GO:BP	replication fork processing	GO:0031297	0.801325	0.0961912	7	5221	1	80927	GSBRNA2T00094368001
GO:BP	erythrose 4-phosphate/phosphoenolpyruvate family amino acid biosynthetic process	GO:1902223	0.801325	0.0961912	20	5221	2	80927	GSBRNA2T00105341001,GSBRNA2T00008904001
GO:BP	UDP-N-acetylglucosamine biosynthetic process	GO:0006048	0.801325	0.0961912	7	5221	1	80927	GSBRNA2T00151730001
GO:BP	peptidyl-arginine methylation	GO:0018216	0.801325	0.0961912	7	5221	1	80927	GSBRNA2T00099774001
GO:BP	protein refolding	GO:0042026	0.801325	0.0961912	33	5221	3	80927	GSBRNA2T00099936001,GSBRNA2T00151751001,GSBRNA2T00114724001
GO:BP	leaf development	GO:0048366	0.801325	0.0961912	20	5221	2	80927	GSBRNA2T00101575001,GSBRNA2T00114181001
GO:BP	UDP-N-acetylglucosamine metabolic process	GO:0006047	0.801325	0.0961912	7	5221	1	80927	GSBRNA2T00151730001
GO:BP	phosphate ion transport	GO:0006817	0.801325	0.0961912	20	5221	2	80927	GSBRNA2T00126427001,GSBRNA2T00071129001
GO:BP	regulation of transcription elongation from RNA polymerase II promoter	GO:0034243	0.801325	0.0961912	7	5221	1	80927	GSBRNA2T00094562001
GO:BP	regulation of transcription by RNA polymerase II	GO:0006357	0.801325	0.0961912	341	5221	24	80927	GSBRNA2T00134310001,GSBRNA2T00129941001,GSBRNA2T00118005001,GSBRNA2T00073102001,GSBRNA2T00126728001,GSBRNA2T00068991001,GSBRNA2T00154251001,GSBRNA2T00054833001,GSBRNA2T00074919001,GSBRNA2T00146477001,GSBRNA2T00090622001,GSBRNA2T00106863001,GSBRNA2T00078692001,GSBRNA2T00115333001,GSBRNA2T00124318001,GSBRNA2T00140350001,GSBRNA2T00112231001,GSBRNA2T00071997001,GSBRNA2T00153123001,GSBRNA2T00033125001…
GO:BP	peptidyl-arginine N-methylation	GO:0035246	0.801325	0.0961912	7	5221	1	80927	GSBRNA2T00099774001
GO:BP	amino sugar biosynthetic process	GO:0046349	0.801325	0.0961912	7	5221	1	80927	GSBRNA2T00151730001
GO:BP	regulation of shoot system development	GO:0048831	0.801325	0.0961912	33	5221	3	80927	GSBRNA2T00074697001,GSBRNA2T00146015001,GSBRNA2T00146011001
GO:BP	glutamyl-tRNA aminoacylation	GO:0006424	0.801325	0.0961912	7	5221	1	80927	GSBRNA2T00145926001
GO:BP	L-phenylalanine biosynthetic process	GO:0009094	0.801325	0.0961912	20	5221	2	80927	GSBRNA2T00105341001,GSBRNA2T00008904001
GO:BP	vesicle-mediated transport to the plasma membrane	GO:0098876	0.801325	0.0961912	7	5221	1	80927	GSBRNA2T00119159001
GO:BP	regulation of TORC1 signaling	GO:1903432	0.801325	0.0961912	7	5221	1	80927	GSBRNA2T00000095001
GO:BP	detoxification	GO:0098754	0.801325	0.0961912	209	5221	15	80927	GSBRNA2T00052894001,GSBRNA2T00088021001,GSBRNA2T00009862001,GSBRNA2T00118837001,GSBRNA2T00035751001,GSBRNA2T00061996001,GSBRNA2T00051670001,GSBRNA2T00000056001,GSBRNA2T00043214001,GSBRNA2T00093204001,GSBRNA2T00056539001,GSBRNA2T00031244001,GSBRNA2T00065523001,GSBRNA2T00052685001,GSBRNA2T00066683001
GO:BP	positive regulation of TORC1 signaling	GO:1904263	0.801325	0.0961912	7	5221	1	80927	GSBRNA2T00000095001
GO:BP	plant organ senescence	GO:0090693	0.801325	0.0961912	7	5221	1	80927	GSBRNA2T00114181001
GO:BP	cellular response to toxic substance	GO:0097237	0.801325	0.0961912	207	5221	15	80927	GSBRNA2T00052894001,GSBRNA2T00088021001,GSBRNA2T00009862001,GSBRNA2T00118837001,GSBRNA2T00035751001,GSBRNA2T00061996001,GSBRNA2T00051670001,GSBRNA2T00000056001,GSBRNA2T00043214001,GSBRNA2T00093204001,GSBRNA2T00056539001,GSBRNA2T00031244001,GSBRNA2T00065523001,GSBRNA2T00052685001,GSBRNA2T00066683001
GO:BP	protein localization to organelle	GO:0033365	0.801325	0.0961912	222	5221	16	80927	GSBRNA2T00074538001,GSBRNA2T00035725001,GSBRNA2T00035726001,GSBRNA2T00050074001,GSBRNA2T00151695001,GSBRNA2T00032831001,GSBRNA2T00115267001,GSBRNA2T00150208001,GSBRNA2T00052545001,GSBRNA2T00128203001,GSBRNA2T00054368001,GSBRNA2T00062226001,GSBRNA2T00068198001,GSBRNA2T00076636001,GSBRNA2T00021988001,GSBRNA2T00139456001
GO:BP	TORC1 signaling	GO:0038202	0.801325	0.0961912	7	5221	1	80927	GSBRNA2T00000095001
GO:BP	oligosaccharide metabolic process	GO:0009311	0.801325	0.0961912	104	5221	8	80927	GSBRNA2T00118912001,GSBRNA2T00090182001,GSBRNA2T00002805001,GSBRNA2T00147625001,GSBRNA2T00146970001,GSBRNA2T00077498001,GSBRNA2T00038971001,GSBRNA2T00133598001
GO:BP	Golgi to plasma membrane transport	GO:0006893	0.801325	0.0961912	7	5221	1	80927	GSBRNA2T00119159001
GO:BP	nucleotide-sugar metabolic process	GO:0009225	0.801325	0.0961912	48	5221	4	80927	GSBRNA2T00033282001,GSBRNA2T00140625001,GSBRNA2T00151730001,GSBRNA2T00015424001
GO:BP	positive regulation of transcription elongation from RNA polymerase II promoter	GO:0032968	0.801325	0.0961912	7	5221	1	80927	GSBRNA2T00094562001
GO:BP	purine nucleoside metabolic process	GO:0042278	0.801325	0.0961912	47	5221	4	80927	GSBRNA2T00135480001,GSBRNA2T00035283001,GSBRNA2T00140522001,GSBRNA2T00002582001
GO:BP	cytidine to uridine editing	GO:0016554	0.801325	0.0961912	34	5221	3	80927	GSBRNA2T00132367001,GSBRNA2T00106704001,GSBRNA2T00112685001
GO:BP	peptidyl-arginine modification	GO:0018195	0.801325	0.0961912	7	5221	1	80927	GSBRNA2T00099774001
GO:BP	leaf senescence	GO:0010150	0.801325	0.0961912	7	5221	1	80927	GSBRNA2T00114181001
GO:BP	protein targeting to membrane	GO:0006612	0.801325	0.0961912	48	5221	4	80927	GSBRNA2T00052545001,GSBRNA2T00062226001,GSBRNA2T00068198001,GSBRNA2T00021988001
GO:BP	oligosaccharide transport	GO:0015772	0.801325	0.0961912	20	5221	2	80927	GSBRNA2T00137296001,GSBRNA2T00116464001
GO:BP	L-serine metabolic process	GO:0006563	0.801325	0.0961912	76	5221	6	80927	GSBRNA2T00130790001,GSBRNA2T00092701001,GSBRNA2T00035765001,GSBRNA2T00099975001,GSBRNA2T00121296001,GSBRNA2T00109483001
GO:BP	amino acid activation	GO:0043038	0.801325	0.0961912	193	5221	14	80927	GSBRNA2T00005823001,GSBRNA2T00123113001,GSBRNA2T00120631001,GSBRNA2T00110274001,GSBRNA2T00058164001,GSBRNA2T00060848001,GSBRNA2T00106811001,GSBRNA2T00150673001,GSBRNA2T00044557001,GSBRNA2T00145926001,GSBRNA2T00145910001,GSBRNA2T00077486001,GSBRNA2T00015284001,GSBRNA2T00109450001
GO:BP	histidine biosynthetic process	GO:0000105	0.801325	0.0961912	34	5221	3	80927	GSBRNA2T00134667001,GSBRNA2T00100431001,GSBRNA2T00061333001
GO:BP	negative gravitropism	GO:0009959	0.801325	0.0961912	34	5221	3	80927	GSBRNA2T00137598001,GSBRNA2T00123748001,GSBRNA2T00134987001
GO:BP	disaccharide transport	GO:0015766	0.801325	0.0961912	20	5221	2	80927	GSBRNA2T00137296001,GSBRNA2T00116464001
GO:BP	histidine metabolic process	GO:0006547	0.801325	0.0961912	34	5221	3	80927	GSBRNA2T00134667001,GSBRNA2T00100431001,GSBRNA2T00061333001
GO:BP	sucrose transport	GO:0015770	0.801325	0.0961912	20	5221	2	80927	GSBRNA2T00137296001,GSBRNA2T00116464001
GO:BP	tRNA aminoacylation	GO:0043039	0.801325	0.0961912	193	5221	14	80927	GSBRNA2T00005823001,GSBRNA2T00123113001,GSBRNA2T00120631001,GSBRNA2T00110274001,GSBRNA2T00058164001,GSBRNA2T00060848001,GSBRNA2T00106811001,GSBRNA2T00150673001,GSBRNA2T00044557001,GSBRNA2T00145926001,GSBRNA2T00145910001,GSBRNA2T00077486001,GSBRNA2T00015284001,GSBRNA2T00109450001
GO:BP	serine family amino acid biosynthetic process	GO:0009070	0.80204	0.095804	77	5221	6	80927	GSBRNA2T00130790001,GSBRNA2T00092701001,GSBRNA2T00035765001,GSBRNA2T00099975001,GSBRNA2T00121296001,GSBRNA2T00109483001
GO:BP	cellular component disassembly	GO:0022411	0.808754	0.0921835	92	5221	7	80927	GSBRNA2T00149651001,GSBRNA2T00110258001,GSBRNA2T00050662001,GSBRNA2T00154540001,GSBRNA2T00096127001,GSBRNA2T00139380001,GSBRNA2T00052594001
GO:BP	energy coupled proton transport, down electrochemical gradient	GO:0015985	0.808754	0.0921835	92	5221	7	80927	GSBRNA2T00080785001,GSBRNA2T00080784001,GSBRNA2T00085766001,GSBRNA2T00000119001,GSBRNA2T00151907001,GSBRNA2T00119832001,GSBRNA2T00115611001
GO:BP	ATP synthesis coupled proton transport	GO:0015986	0.808754	0.0921835	92	5221	7	80927	GSBRNA2T00080785001,GSBRNA2T00080784001,GSBRNA2T00085766001,GSBRNA2T00000119001,GSBRNA2T00151907001,GSBRNA2T00119832001,GSBRNA2T00115611001
GO:BP	response to toxic substance	GO:0009636	0.816466	0.088062	211	5221	15	80927	GSBRNA2T00052894001,GSBRNA2T00088021001,GSBRNA2T00009862001,GSBRNA2T00118837001,GSBRNA2T00035751001,GSBRNA2T00061996001,GSBRNA2T00051670001,GSBRNA2T00000056001,GSBRNA2T00043214001,GSBRNA2T00093204001,GSBRNA2T00056539001,GSBRNA2T00031244001,GSBRNA2T00065523001,GSBRNA2T00052685001,GSBRNA2T00066683001
GO:BP	ribonucleoside metabolic process	GO:0009119	0.820243	0.0860576	49	5221	4	80927	GSBRNA2T00135480001,GSBRNA2T00035283001,GSBRNA2T00140522001,GSBRNA2T00002582001
GO:BP	regulation of DNA-dependent DNA replication	GO:0090329	0.820243	0.0860576	49	5221	4	80927	GSBRNA2T00116951001,GSBRNA2T00155346001,GSBRNA2T00152670001,GSBRNA2T00078704001
GO:BP	response to oxygen-containing compound	GO:1901700	0.826085	0.0829755	197	5221	14	80927	GSBRNA2T00083129001,GSBRNA2T00101570001,GSBRNA2T00074877001,GSBRNA2T00035751001,GSBRNA2T00005544001,GSBRNA2T00037261001,GSBRNA2T00134984001,GSBRNA2T00074020001,GSBRNA2T00141156001,GSBRNA2T00147458001,GSBRNA2T00138944001,GSBRNA2T00148208001,GSBRNA2T00071535001,GSBRNA2T00115838001
GO:BP	ATP biosynthetic process	GO:0006754	0.826085	0.0829755	93	5221	7	80927	GSBRNA2T00080785001,GSBRNA2T00080784001,GSBRNA2T00085766001,GSBRNA2T00000119001,GSBRNA2T00151907001,GSBRNA2T00119832001,GSBRNA2T00115611001
GO:BP	protein kinase C-activating G protein-coupled receptor signaling pathway	GO:0007205	0.82707	0.0824578	21	5221	2	80927	GSBRNA2T00068585001,GSBRNA2T00115870001
GO:BP	protein import into mitochondrial matrix	GO:0030150	0.82707	0.0824578	21	5221	2	80927	GSBRNA2T00032831001,GSBRNA2T00054368001
GO:BP	cytochrome complex assembly	GO:0017004	0.82707	0.0824578	21	5221	2	80927	GSBRNA2T00111677001,GSBRNA2T00130293001
GO:BP	photosynthesis, light harvesting	GO:0009765	0.82707	0.0824578	64	5221	5	80927	GSBRNA2T00009877001,GSBRNA2T00076226001,GSBRNA2T00095036001,GSBRNA2T00120227001,GSBRNA2T00018440001
GO:BP	base conversion or substitution editing	GO:0016553	0.82707	0.0824578	35	5221	3	80927	GSBRNA2T00132367001,GSBRNA2T00106704001,GSBRNA2T00112685001
GO:BP	cysteinyl-tRNA aminoacylation	GO:0006423	0.831991	0.0798814	8	5221	1	80927	GSBRNA2T00060848001
GO:BP	post-Golgi vesicle-mediated transport	GO:0006892	0.831991	0.0798814	8	5221	1	80927	GSBRNA2T00119159001
GO:BP	lipid storage	GO:0019915	0.831991	0.0798814	8	5221	1	80927	GSBRNA2T00108570001
GO:BP	purine nucleoside biosynthetic process	GO:0042451	0.831991	0.0798814	36	5221	3	80927	GSBRNA2T00135480001,GSBRNA2T00035283001,GSBRNA2T00140522001
GO:BP	ribosomal large subunit export from nucleus	GO:0000055	0.831991	0.0798814	8	5221	1	80927	GSBRNA2T00018529001
GO:BP	ribosome localization	GO:0033750	0.831991	0.0798814	8	5221	1	80927	GSBRNA2T00018529001
GO:BP	fatty acid derivative metabolic process	GO:1901568	0.831991	0.0798814	8	5221	1	80927	GSBRNA2T00151899001
GO:BP	mitotic sister chromatid cohesion	GO:0007064	0.831991	0.0798814	36	5221	3	80927	GSBRNA2T00071122001,GSBRNA2T00099180001,GSBRNA2T00154913001
GO:BP	rRNA-containing ribonucleoprotein complex export from nucleus	GO:0071428	0.831991	0.0798814	8	5221	1	80927	GSBRNA2T00018529001
GO:BP	fatty acid derivative biosynthetic process	GO:1901570	0.831991	0.0798814	8	5221	1	80927	GSBRNA2T00151899001
GO:BP	shoot system morphogenesis	GO:0010016	0.831991	0.0798814	8	5221	1	80927	GSBRNA2T00114181001
GO:BP	DNA conformation change	GO:0071103	0.831991	0.0798814	213	5221	15	80927	GSBRNA2T00134310001,GSBRNA2T00130420001,GSBRNA2T00034777001,GSBRNA2T00058175001,GSBRNA2T00117730001,GSBRNA2T00059083001,GSBRNA2T00040186001,GSBRNA2T00013005001,GSBRNA2T00030928001,GSBRNA2T00134833001,GSBRNA2T00157382001,GSBRNA2T00039985001,GSBRNA2T00122727001,GSBRNA2T00094380001,GSBRNA2T00044423001
GO:BP	aging	GO:0007568	0.831991	0.0798814	8	5221	1	80927	GSBRNA2T00114181001
GO:BP	ribonucleoside biosynthetic process	GO:0042455	0.831991	0.0798814	36	5221	3	80927	GSBRNA2T00135480001,GSBRNA2T00035283001,GSBRNA2T00140522001
GO:BP	nucleoside biosynthetic process	GO:0009163	0.831991	0.0798814	36	5221	3	80927	GSBRNA2T00135480001,GSBRNA2T00035283001,GSBRNA2T00140522001
GO:BP	DNA-dependent DNA replication maintenance of fidelity	GO:0045005	0.831991	0.0798814	8	5221	1	80927	GSBRNA2T00094368001
GO:BP	mitochondrial respiratory chain complex III assembly	GO:0034551	0.831991	0.0798814	8	5221	1	80927	GSBRNA2T00130293001
GO:BP	sulfur compound transport	GO:0072348	0.831991	0.0798814	50	5221	4	80927	GSBRNA2T00100969001,GSBRNA2T00081088001,GSBRNA2T00015696001,GSBRNA2T00018454001
GO:BP	mitochondrial fission	GO:0000266	0.831991	0.0798814	8	5221	1	80927	GSBRNA2T00151962001
GO:BP	respiratory chain complex III assembly	GO:0017062	0.831991	0.0798814	8	5221	1	80927	GSBRNA2T00130293001
GO:BP	purine ribonucleoside biosynthetic process	GO:0046129	0.831991	0.0798814	36	5221	3	80927	GSBRNA2T00135480001,GSBRNA2T00035283001,GSBRNA2T00140522001
GO:BP	cellular lipid catabolic process	GO:0044242	0.831991	0.0798814	36	5221	3	80927	GSBRNA2T00132396001,GSBRNA2T00141865001,GSBRNA2T00134772001
GO:BP	glycosyl compound biosynthetic process	GO:1901659	0.831991	0.0798814	36	5221	3	80927	GSBRNA2T00135480001,GSBRNA2T00035283001,GSBRNA2T00140522001
GO:BP	sulfate transport	GO:0008272	0.831991	0.0798814	50	5221	4	80927	GSBRNA2T00100969001,GSBRNA2T00081088001,GSBRNA2T00015696001,GSBRNA2T00018454001
GO:BP	ribosomal subunit export from nucleus	GO:0000054	0.831991	0.0798814	8	5221	1	80927	GSBRNA2T00018529001
GO:BP	protein ubiquitination	GO:0016567	0.837459	0.0770363	397	5221	27	80927	GSBRNA2T00085673001,GSBRNA2T00085669001,GSBRNA2T00047296001,GSBRNA2T00065961001,GSBRNA2T00009874001,GSBRNA2T00136001001,GSBRNA2T00132172001,GSBRNA2T00132171001,GSBRNA2T00142050001,GSBRNA2T00078332001,GSBRNA2T00134859001,GSBRNA2T00136564001,GSBRNA2T00108780001,GSBRNA2T00088793001,GSBRNA2T00088543001,GSBRNA2T00032793001,GSBRNA2T00081910001,GSBRNA2T00151756001,GSBRNA2T00151755001,GSBRNA2T00091551001…
GO:BP	pseudouridine synthesis	GO:0001522	0.837561	0.0769835	51	5221	4	80927	GSBRNA2T00122310001,GSBRNA2T00114774001,GSBRNA2T00115875001,GSBRNA2T00066693001
GO:BP	cell population proliferation	GO:0008283	0.837561	0.0769835	22	5221	2	80927	GSBRNA2T00076893001,GSBRNA2T00074697001
GO:BP	mitochondrial respiratory chain complex assembly	GO:0033108	0.837561	0.0769835	22	5221	2	80927	GSBRNA2T00130293001,GSBRNA2T00034922001
GO:BP	protein targeting to ER	GO:0045047	0.837561	0.0769835	51	5221	4	80927	GSBRNA2T00052545001,GSBRNA2T00062226001,GSBRNA2T00068198001,GSBRNA2T00021988001
GO:BP	establishment of protein localization to endoplasmic reticulum	GO:0072599	0.837561	0.0769835	51	5221	4	80927	GSBRNA2T00052545001,GSBRNA2T00062226001,GSBRNA2T00068198001,GSBRNA2T00021988001
GO:BP	DNA recombination	GO:0006310	0.84585	0.0727069	111	5221	8	80927	GSBRNA2T00144461001,GSBRNA2T00040186001,GSBRNA2T00134692001,GSBRNA2T00078557001,GSBRNA2T00094368001,GSBRNA2T00094380001,GSBRNA2T00146122001,GSBRNA2T00044423001
GO:BP	nuclear transport	GO:0051169	0.84585	0.0727069	111	5221	8	80927	GSBRNA2T00009905001,GSBRNA2T00074538001,GSBRNA2T00035725001,GSBRNA2T00035726001,GSBRNA2T00001851001,GSBRNA2T00151695001,GSBRNA2T00018529001,GSBRNA2T00150208001
GO:BP	nucleocytoplasmic transport	GO:0006913	0.84585	0.0727069	111	5221	8	80927	GSBRNA2T00009905001,GSBRNA2T00074538001,GSBRNA2T00035725001,GSBRNA2T00035726001,GSBRNA2T00001851001,GSBRNA2T00151695001,GSBRNA2T00018529001,GSBRNA2T00150208001
GO:BP	aromatic amino acid family metabolic process	GO:0009072	0.84585	0.0727069	156	5221	11	80927	GSBRNA2T00144509001,GSBRNA2T00069052001,GSBRNA2T00105341001,GSBRNA2T00134667001,GSBRNA2T00100431001,GSBRNA2T00008904001,GSBRNA2T00071966001,GSBRNA2T00114799001,GSBRNA2T00101955001,GSBRNA2T00061333001,GSBRNA2T00018448001
GO:BP	response to abscisic acid	GO:0009737	0.847439	0.0718914	37	5221	3	80927	GSBRNA2T00005544001,GSBRNA2T00141156001,GSBRNA2T00147458001
GO:BP	nucleic acid transport	GO:0050657	0.847439	0.0718914	37	5221	3	80927	GSBRNA2T00009905001,GSBRNA2T00001851001,GSBRNA2T00018529001
GO:BP	RNA transport	GO:0050658	0.847439	0.0718914	37	5221	3	80927	GSBRNA2T00009905001,GSBRNA2T00001851001,GSBRNA2T00018529001
GO:BP	establishment of RNA localization	GO:0051236	0.847439	0.0718914	37	5221	3	80927	GSBRNA2T00009905001,GSBRNA2T00001851001,GSBRNA2T00018529001
GO:BP	response to alcohol	GO:0097305	0.847439	0.0718914	37	5221	3	80927	GSBRNA2T00005544001,GSBRNA2T00141156001,GSBRNA2T00147458001
GO:BP	RNA localization	GO:0006403	0.847439	0.0718914	37	5221	3	80927	GSBRNA2T00009905001,GSBRNA2T00001851001,GSBRNA2T00018529001
GO:BP	ribosomal small subunit assembly	GO:0000028	0.851668	0.0697298	9	5221	1	80927	GSBRNA2T00057321001
GO:BP	protein insertion into mitochondrial outer membrane	GO:0045040	0.851668	0.0697298	9	5221	1	80927	GSBRNA2T00050074001
GO:BP	positive regulation of DNA-templated transcription, elongation	GO:0032786	0.851668	0.0697298	9	5221	1	80927	GSBRNA2T00094562001
GO:BP	mRNA cleavage	GO:0006379	0.851668	0.0697298	9	5221	1	80927	GSBRNA2T00145608001
GO:BP	amide biosynthetic process	GO:0043604	0.851668	0.0697298	1691	5221	111	80927	GSBRNA2T00134579001,GSBRNA2T00134408001,GSBRNA2T00094614001,GSBRNA2T00044826001,GSBRNA2T00111722001,GSBRNA2T00005823001,GSBRNA2T00123113001,GSBRNA2T00085609001,GSBRNA2T00120631001,GSBRNA2T00110274001,GSBRNA2T00129743001,GSBRNA2T00129829001,GSBRNA2T00009904001,GSBRNA2T00009872001,GSBRNA2T00080811001,GSBRNA2T00122308001,GSBRNA2T00136425001,GSBRNA2T00034680001,GSBRNA2T00074507001,GSBRNA2T00058164001…
GO:BP	mRNA transport	GO:0051028	0.851668	0.0697298	23	5221	2	80927	GSBRNA2T00009905001,GSBRNA2T00001851001
GO:BP	cellular amide metabolic process	GO:0043603	0.851668	0.0697298	1849	5221	121	80927	GSBRNA2T00134579001,GSBRNA2T00134408001,GSBRNA2T00094614001,GSBRNA2T00044826001,GSBRNA2T00111722001,GSBRNA2T00005823001,GSBRNA2T00123113001,GSBRNA2T00085609001,GSBRNA2T00104946001,GSBRNA2T00120631001,GSBRNA2T00110274001,GSBRNA2T00129743001,GSBRNA2T00129829001,GSBRNA2T00009904001,GSBRNA2T00009872001,GSBRNA2T00080811001,GSBRNA2T00122308001,GSBRNA2T00136425001,GSBRNA2T00034680001,GSBRNA2T00074507001…
GO:BP	activation of protein kinase activity	GO:0032147	0.851668	0.0697298	23	5221	2	80927	GSBRNA2T00126733001,GSBRNA2T00151747001
GO:BP	polyol biosynthetic process	GO:0046173	0.851668	0.0697298	23	5221	2	80927	GSBRNA2T00068996001,GSBRNA2T00146159001
GO:BP	alcohol biosynthetic process	GO:0046165	0.851668	0.0697298	52	5221	4	80927	GSBRNA2T00081585001,GSBRNA2T00068996001,GSBRNA2T00115296001,GSBRNA2T00146159001
GO:BP	outer mitochondrial membrane organization	GO:0007008	0.851668	0.0697298	9	5221	1	80927	GSBRNA2T00050074001
GO:BP	mitotic spindle organization	GO:0007052	0.851668	0.0697298	23	5221	2	80927	GSBRNA2T00126733001,GSBRNA2T00151747001
GO:BP	cell cycle arrest	GO:0007050	0.851668	0.0697298	23	5221	2	80927	GSBRNA2T00154032001,GSBRNA2T00109531001
GO:BP	female gamete generation	GO:0007292	0.851668	0.0697298	9	5221	1	80927	GSBRNA2T00109534001
GO:BP	female meiotic nuclear division	GO:0007143	0.851668	0.0697298	9	5221	1	80927	GSBRNA2T00109534001
GO:BP	peptidyl-cysteine modification	GO:0018198	0.851668	0.0697298	9	5221	1	80927	GSBRNA2T00080761001
GO:BP	response to gravity	GO:0009629	0.851668	0.0697298	52	5221	4	80927	GSBRNA2T00137598001,GSBRNA2T00123748001,GSBRNA2T00134987001,GSBRNA2T00125920001
GO:BP	divalent inorganic cation transport	GO:0072511	0.851668	0.0697298	112	5221	8	80927	GSBRNA2T00070254001,GSBRNA2T00113869001,GSBRNA2T00127402001,GSBRNA2T00151989001,GSBRNA2T00111234001,GSBRNA2T00093028001,GSBRNA2T00065618001,GSBRNA2T00103237001
GO:BP	isopentenyl diphosphate metabolic process	GO:0046490	0.851668	0.0697298	9	5221	1	80927	GSBRNA2T00028864001
GO:BP	DNA endoreduplication	GO:0042023	0.851668	0.0697298	53	5221	4	80927	GSBRNA2T00116951001,GSBRNA2T00155346001,GSBRNA2T00152670001,GSBRNA2T00078704001
GO:BP	microtubule cytoskeleton organization involved in mitosis	GO:1902850	0.851668	0.0697298	23	5221	2	80927	GSBRNA2T00126733001,GSBRNA2T00151747001
GO:BP	isopentenyl diphosphate biosynthetic process	GO:0009240	0.851668	0.0697298	9	5221	1	80927	GSBRNA2T00028864001
GO:BP	post-transcriptional gene silencing by RNA	GO:0035194	0.851668	0.0697298	9	5221	1	80927	GSBRNA2T00078576001
GO:BP	organophosphate metabolic process	GO:0019637	0.851668	0.0697298	1018	5221	67	80927	GSBRNA2T00051772001,GSBRNA2T00068863001,GSBRNA2T00068862001,GSBRNA2T00009885001,GSBRNA2T00009894001,GSBRNA2T00080785001,GSBRNA2T00080784001,GSBRNA2T00122075001,GSBRNA2T00156369001,GSBRNA2T00064232001,GSBRNA2T00156878001,GSBRNA2T00093561001,GSBRNA2T00021163001,GSBRNA2T00031131001,GSBRNA2T00105714001,GSBRNA2T00087615001,GSBRNA2T00085766001,GSBRNA2T00101739001,GSBRNA2T00068996001,GSBRNA2T00069045001…
GO:BP	aromatic amino acid family biosynthetic process, prephenate pathway	GO:0009095	0.851668	0.0697298	23	5221	2	80927	GSBRNA2T00105341001,GSBRNA2T00008904001
GO:BP	regulation of mitotic spindle organization	GO:0060236	0.851668	0.0697298	23	5221	2	80927	GSBRNA2T00126733001,GSBRNA2T00151747001
GO:BP	threonyl-tRNA aminoacylation	GO:0006435	0.851668	0.0697298	9	5221	1	80927	GSBRNA2T00145910001
GO:BP	divalent metal ion transport	GO:0070838	0.851668	0.0697298	112	5221	8	80927	GSBRNA2T00070254001,GSBRNA2T00113869001,GSBRNA2T00127402001,GSBRNA2T00151989001,GSBRNA2T00111234001,GSBRNA2T00093028001,GSBRNA2T00065618001,GSBRNA2T00103237001
GO:BP	regulation of spindle organization	GO:0090224	0.851668	0.0697298	23	5221	2	80927	GSBRNA2T00126733001,GSBRNA2T00151747001
GO:BP	posttranscriptional gene silencing	GO:0016441	0.851668	0.0697298	9	5221	1	80927	GSBRNA2T00078576001
GO:BP	phosphatidylinositol-3-phosphate biosynthetic process	GO:0036092	0.851668	0.0697298	9	5221	1	80927	GSBRNA2T00042892001
GO:BP	organic cyclic compound catabolic process	GO:1901361	0.851668	0.0697298	203	5221	14	80927	GSBRNA2T00131613001,GSBRNA2T00116916001,GSBRNA2T00155307001,GSBRNA2T00062085001,GSBRNA2T00112701001,GSBRNA2T00088812001,GSBRNA2T00152742001,GSBRNA2T00005397001,GSBRNA2T00086710001,GSBRNA2T00138191001,GSBRNA2T00047905001,GSBRNA2T00002582001,GSBRNA2T00080011001,GSBRNA2T00109440001
GO:BP	gravitropism	GO:0009630	0.851668	0.0697298	52	5221	4	80927	GSBRNA2T00137598001,GSBRNA2T00123748001,GSBRNA2T00134987001,GSBRNA2T00125920001
GO:BP	chromosome organization	GO:0051276	0.865139	0.0629143	528	5221	35	80927	GSBRNA2T00134310001,GSBRNA2T00130420001,GSBRNA2T00009905001,GSBRNA2T00136259001,GSBRNA2T00034777001,GSBRNA2T00058175001,GSBRNA2T00095217001,GSBRNA2T00035792001,GSBRNA2T00106946001,GSBRNA2T00117730001,GSBRNA2T00059083001,GSBRNA2T00040186001,GSBRNA2T00013005001,GSBRNA2T00074697001,GSBRNA2T00030928001,GSBRNA2T00129306001,GSBRNA2T00134908001,GSBRNA2T00134833001,GSBRNA2T00157382001,GSBRNA2T00039985001…
GO:BP	regulation of DNA replication	GO:0006275	0.871094	0.059935	54	5221	4	80927	GSBRNA2T00116951001,GSBRNA2T00155346001,GSBRNA2T00152670001,GSBRNA2T00078704001
GO:BP	regulation of reproductive process	GO:2000241	0.871094	0.059935	54	5221	4	80927	GSBRNA2T00052025001,GSBRNA2T00074697001,GSBRNA2T00146015001,GSBRNA2T00146011001
GO:BP	macroautophagy	GO:0016236	0.871664	0.0596506	24	5221	2	80927	GSBRNA2T00027326001,GSBRNA2T00153988001
GO:BP	hydrogen peroxide catabolic process	GO:0042744	0.894946	0.0482034	193	5221	13	80927	GSBRNA2T00131028001,GSBRNA2T00009862001,GSBRNA2T00061996001,GSBRNA2T00051670001,GSBRNA2T00043214001,GSBRNA2T00157525001,GSBRNA2T00093204001,GSBRNA2T00056539001,GSBRNA2T00031244001,GSBRNA2T00128468001,GSBRNA2T00099596001,GSBRNA2T00121481001,GSBRNA2T00153039001
GO:BP	phosphorelay signal transduction system	GO:0000160	0.895555	0.0479077	147	5221	10	80927	GSBRNA2T00126266001,GSBRNA2T00122028001,GSBRNA2T00143652001,GSBRNA2T00069036001,GSBRNA2T00055429001,GSBRNA2T00081912001,GSBRNA2T00111300001,GSBRNA2T00146028001,GSBRNA2T00017195001,GSBRNA2T00155875001
GO:BP	spliceosomal complex assembly	GO:0000245	0.899077	0.0462032	25	5221	2	80927	GSBRNA2T00110169001,GSBRNA2T00018491001
GO:BP	adenine biosynthetic process	GO:0046084	0.899077	0.0462032	10	5221	1	80927	GSBRNA2T00143476001
GO:BP	adenine salvage	GO:0006168	0.899077	0.0462032	10	5221	1	80927	GSBRNA2T00143476001
GO:BP	hydrogen peroxide metabolic process	GO:0042743	0.899077	0.0462032	194	5221	13	80927	GSBRNA2T00131028001,GSBRNA2T00009862001,GSBRNA2T00061996001,GSBRNA2T00051670001,GSBRNA2T00043214001,GSBRNA2T00157525001,GSBRNA2T00093204001,GSBRNA2T00056539001,GSBRNA2T00031244001,GSBRNA2T00128468001,GSBRNA2T00099596001,GSBRNA2T00121481001,GSBRNA2T00153039001
GO:BP	transcription, RNA-templated	GO:0001172	0.899077	0.0462032	10	5221	1	80927	GSBRNA2T00078343001
GO:BP	protein maturation by iron-sulfur cluster transfer	GO:0097428	0.899077	0.0462032	25	5221	2	80927	GSBRNA2T00073265001,GSBRNA2T00078721001
GO:BP	regulation of asymmetric cell division	GO:0009786	0.899077	0.0462032	10	5221	1	80927	GSBRNA2T00088735001
GO:BP	seryl-tRNA aminoacylation	GO:0006434	0.899077	0.0462032	10	5221	1	80927	GSBRNA2T00109450001
GO:BP	adenine metabolic process	GO:0046083	0.899077	0.0462032	10	5221	1	80927	GSBRNA2T00143476001
GO:BP	inositol biosynthetic process	GO:0006021	0.899077	0.0462032	10	5221	1	80927	GSBRNA2T00068996001
GO:BP	purine nucleobase salvage	GO:0043096	0.899077	0.0462032	10	5221	1	80927	GSBRNA2T00143476001
GO:BP	G protein-coupled receptor signaling pathway	GO:0007186	0.907473	0.0421661	56	5221	4	80927	GSBRNA2T00068585001,GSBRNA2T00154215001,GSBRNA2T00081353001,GSBRNA2T00115870001
GO:BP	organic anion transport	GO:0015711	0.911802	0.0400993	118	5221	8	80927	GSBRNA2T00105361001,GSBRNA2T00001912001,GSBRNA2T00033287001,GSBRNA2T00091610001,GSBRNA2T00104676001,GSBRNA2T00104678001,GSBRNA2T00115966001,GSBRNA2T00133567001
GO:BP	cellular ketone metabolic process	GO:0042180	0.912108	0.0399536	60	5221	4	80927	GSBRNA2T00081585001,GSBRNA2T00115296001,GSBRNA2T00079573001,GSBRNA2T00014764001
GO:BP	pectin biosynthetic process	GO:0045489	0.912108	0.0399536	60	5221	4	80927	GSBRNA2T00041400001,GSBRNA2T00087501001,GSBRNA2T00072292001,GSBRNA2T00151750001
GO:BP	ketone biosynthetic process	GO:0042181	0.912108	0.0399536	26	5221	2	80927	GSBRNA2T00079573001,GSBRNA2T00014764001
GO:BP	NADP biosynthetic process	GO:0006741	0.912108	0.0399536	12	5221	1	80927	GSBRNA2T00122385001
GO:BP	amino acid export across plasma membrane	GO:0032973	0.912108	0.0399536	12	5221	1	80927	GSBRNA2T00133567001
GO:BP	positive regulation of phosphorylation	GO:0042327	0.912108	0.0399536	28	5221	2	80927	GSBRNA2T00126733001,GSBRNA2T00151747001
GO:BP	positive regulation of phosphate metabolic process	GO:0045937	0.912108	0.0399536	28	5221	2	80927	GSBRNA2T00126733001,GSBRNA2T00151747001
GO:BP	hormone metabolic process	GO:0042445	0.912108	0.0399536	43	5221	3	80927	GSBRNA2T00012900001,GSBRNA2T00151990001,GSBRNA2T00145954001
GO:BP	fructose 6-phosphate metabolic process	GO:0006002	0.912108	0.0399536	26	5221	2	80927	GSBRNA2T00007196001,GSBRNA2T00150980001
GO:BP	translational frameshifting	GO:0006452	0.912108	0.0399536	12	5221	1	80927	GSBRNA2T00139380001
GO:BP	mRNA cis splicing, via spliceosome	GO:0045292	0.912108	0.0399536	12	5221	1	80927	GSBRNA2T00018491001
GO:BP	nucleobase-containing small molecule biosynthetic process	GO:0034404	0.912108	0.0399536	44	5221	3	80927	GSBRNA2T00135480001,GSBRNA2T00035283001,GSBRNA2T00140522001
GO:BP	regulation of translation	GO:0006417	0.912108	0.0399536	42	5221	3	80927	GSBRNA2T00085609001,GSBRNA2T00139380001,GSBRNA2T00006418001
GO:BP	S-adenosylmethionine biosynthetic process	GO:0006556	0.912108	0.0399536	11	5221	1	80927	GSBRNA2T00018367001
GO:BP	regulation of cellular amide metabolic process	GO:0034248	0.912108	0.0399536	42	5221	3	80927	GSBRNA2T00085609001,GSBRNA2T00139380001,GSBRNA2T00006418001
GO:BP	protein maturation by [4Fe-4S] cluster transfer	GO:0106035	0.912108	0.0399536	12	5221	1	80927	GSBRNA2T00073265001
GO:BP	positive regulation of protein-containing complex disassembly	GO:0043243	0.912108	0.0399536	12	5221	1	80927	GSBRNA2T00139380001
GO:BP	mitochondrial ATP synthesis coupled electron transport	GO:0042775	0.912108	0.0399536	26	5221	2	80927	GSBRNA2T00063873001,GSBRNA2T00114725001
GO:BP	regulation of amino acid transmembrane transport	GO:1903789	0.912108	0.0399536	12	5221	1	80927	GSBRNA2T00133567001
GO:BP	cellular response to nitrogen levels	GO:0043562	0.912108	0.0399536	12	5221	1	80927	GSBRNA2T00148208001
GO:BP	regulation of translational termination	GO:0006449	0.912108	0.0399536	12	5221	1	80927	GSBRNA2T00139380001
GO:BP	cellular hormone metabolic process	GO:0034754	0.912108	0.0399536	42	5221	3	80927	GSBRNA2T00012900001,GSBRNA2T00151990001,GSBRNA2T00145954001
GO:BP	positive regulation of translational termination	GO:0045905	0.912108	0.0399536	12	5221	1	80927	GSBRNA2T00139380001
GO:BP	positive regulation of translational elongation	GO:0045901	0.912108	0.0399536	12	5221	1	80927	GSBRNA2T00139380001
GO:BP	protein export from nucleus	GO:0006611	0.912108	0.0399536	27	5221	2	80927	GSBRNA2T00009905001,GSBRNA2T00018529001
GO:BP	positive regulation of kinase activity	GO:0033674	0.912108	0.0399536	28	5221	2	80927	GSBRNA2T00126733001,GSBRNA2T00151747001
GO:BP	negative regulation of transcription, DNA-templated	GO:0045892	0.912108	0.0399536	106	5221	7	80927	GSBRNA2T00032489001,GSBRNA2T00064188001,GSBRNA2T00018234001,GSBRNA2T00078683001,GSBRNA2T00151926001,GSBRNA2T00080939001,GSBRNA2T00018458001
GO:BP	positive regulation of protein kinase activity	GO:0045860	0.912108	0.0399536	26	5221	2	80927	GSBRNA2T00126733001,GSBRNA2T00151747001
GO:BP	hormone biosynthetic process	GO:0042446	0.912108	0.0399536	27	5221	2	80927	GSBRNA2T00151990001,GSBRNA2T00145954001
GO:BP	tetrahydrofolate interconversion	GO:0035999	0.912108	0.0399536	27	5221	2	80927	GSBRNA2T00045161001,GSBRNA2T00022029001
GO:BP	protein N-linked glycosylation	GO:0006487	0.912108	0.0399536	58	5221	4	80927	GSBRNA2T00123011001,GSBRNA2T00134949001,GSBRNA2T00135023001,GSBRNA2T00151832001
GO:BP	male gamete generation	GO:0048232	0.912108	0.0399536	27	5221	2	80927	GSBRNA2T00095233001,GSBRNA2T00109534001
GO:BP	NAD metabolic process	GO:0019674	0.912108	0.0399536	12	5221	1	80927	GSBRNA2T00122385001
GO:BP	DNA modification	GO:0006304	0.912108	0.0399536	27	5221	2	80927	GSBRNA2T00000801001,GSBRNA2T00079238001
GO:BP	DNA alkylation	GO:0006305	0.912108	0.0399536	27	5221	2	80927	GSBRNA2T00000801001,GSBRNA2T00079238001
GO:BP	DNA methylation	GO:0006306	0.912108	0.0399536	27	5221	2	80927	GSBRNA2T00000801001,GSBRNA2T00079238001
GO:BP	aromatic compound catabolic process	GO:0019439	0.912108	0.0399536	196	5221	13	80927	GSBRNA2T00131613001,GSBRNA2T00116916001,GSBRNA2T00155307001,GSBRNA2T00062085001,GSBRNA2T00088812001,GSBRNA2T00152742001,GSBRNA2T00005397001,GSBRNA2T00086710001,GSBRNA2T00138191001,GSBRNA2T00047905001,GSBRNA2T00002582001,GSBRNA2T00080011001,GSBRNA2T00109440001
GO:BP	ribonucleotide biosynthetic process	GO:0009260	0.912108	0.0399536	217	5221	14	80927	GSBRNA2T00009885001,GSBRNA2T00080785001,GSBRNA2T00080784001,GSBRNA2T00156878001,GSBRNA2T00031131001,GSBRNA2T00105714001,GSBRNA2T00085766001,GSBRNA2T00074672001,GSBRNA2T00000119001,GSBRNA2T00151907001,GSBRNA2T00119832001,GSBRNA2T00128475001,GSBRNA2T00115611001,GSBRNA2T00109670001
GO:BP	RNA splicing, via transesterification reactions	GO:0000375	0.912108	0.0399536	232	5221	15	80927	GSBRNA2T00134537001,GSBRNA2T00110169001,GSBRNA2T00129689001,GSBRNA2T00136368001,GSBRNA2T00089488001,GSBRNA2T00155274001,GSBRNA2T00009425001,GSBRNA2T00106116001,GSBRNA2T00151610001,GSBRNA2T00135019001,GSBRNA2T00091296001,GSBRNA2T00009080001,GSBRNA2T00125208001,GSBRNA2T00018491001,GSBRNA2T00109440001
GO:BP	regulation of organic acid transport	GO:0032890	0.912108	0.0399536	12	5221	1	80927	GSBRNA2T00133567001
GO:BP	phyllome development	GO:0048827	0.912108	0.0399536	26	5221	2	80927	GSBRNA2T00101575001,GSBRNA2T00114181001
GO:BP	RNA splicing, via transesterification reactions with bulged adenosine as nucleophile	GO:0000377	0.912108	0.0399536	232	5221	15	80927	GSBRNA2T00134537001,GSBRNA2T00110169001,GSBRNA2T00129689001,GSBRNA2T00136368001,GSBRNA2T00089488001,GSBRNA2T00155274001,GSBRNA2T00009425001,GSBRNA2T00106116001,GSBRNA2T00151610001,GSBRNA2T00135019001,GSBRNA2T00091296001,GSBRNA2T00009080001,GSBRNA2T00125208001,GSBRNA2T00018491001,GSBRNA2T00109440001
GO:BP	purine ribonucleoside triphosphate metabolic process	GO:0009205	0.912108	0.0399536	107	5221	7	80927	GSBRNA2T00080785001,GSBRNA2T00080784001,GSBRNA2T00085766001,GSBRNA2T00000119001,GSBRNA2T00151907001,GSBRNA2T00119832001,GSBRNA2T00115611001
GO:BP	establishment of protein localization to organelle	GO:0072594	0.912108	0.0399536	197	5221	13	80927	GSBRNA2T00074538001,GSBRNA2T00035725001,GSBRNA2T00035726001,GSBRNA2T00050074001,GSBRNA2T00151695001,GSBRNA2T00032831001,GSBRNA2T00115267001,GSBRNA2T00150208001,GSBRNA2T00052545001,GSBRNA2T00054368001,GSBRNA2T00062226001,GSBRNA2T00068198001,GSBRNA2T00021988001
GO:BP	mRNA splicing, via spliceosome	GO:0000398	0.912108	0.0399536	227	5221	15	80927	GSBRNA2T00134537001,GSBRNA2T00110169001,GSBRNA2T00129689001,GSBRNA2T00136368001,GSBRNA2T00089488001,GSBRNA2T00155274001,GSBRNA2T00009425001,GSBRNA2T00106116001,GSBRNA2T00151610001,GSBRNA2T00135019001,GSBRNA2T00091296001,GSBRNA2T00009080001,GSBRNA2T00125208001,GSBRNA2T00018491001,GSBRNA2T00109440001
GO:BP	cellular process involved in reproduction in multicellular organism	GO:0022412	0.912108	0.0399536	27	5221	2	80927	GSBRNA2T00095233001,GSBRNA2T00109534001
GO:BP	protein localization to membrane	GO:0072657	0.912108	0.0399536	106	5221	7	80927	GSBRNA2T00061975001,GSBRNA2T00050074001,GSBRNA2T00115267001,GSBRNA2T00052545001,GSBRNA2T00062226001,GSBRNA2T00068198001,GSBRNA2T00021988001
GO:BP	negative regulation of reproductive process	GO:2000242	0.912108	0.0399536	11	5221	1	80927	GSBRNA2T00074697001
GO:BP	purine nucleoside triphosphate biosynthetic process	GO:0009145	0.912108	0.0399536	107	5221	7	80927	GSBRNA2T00080785001,GSBRNA2T00080784001,GSBRNA2T00085766001,GSBRNA2T00000119001,GSBRNA2T00151907001,GSBRNA2T00119832001,GSBRNA2T00115611001
GO:BP	purine ribonucleoside triphosphate biosynthetic process	GO:0009206	0.912108	0.0399536	107	5221	7	80927	GSBRNA2T00080785001,GSBRNA2T00080784001,GSBRNA2T00085766001,GSBRNA2T00000119001,GSBRNA2T00151907001,GSBRNA2T00119832001,GSBRNA2T00115611001
GO:BP	starch biosynthetic process	GO:0019252	0.912108	0.0399536	12	5221	1	80927	GSBRNA2T00114672001
GO:BP	cytokinin metabolic process	GO:0009690	0.912108	0.0399536	42	5221	3	80927	GSBRNA2T00012900001,GSBRNA2T00151990001,GSBRNA2T00145954001
GO:BP	cytokinin biosynthetic process	GO:0009691	0.912108	0.0399536	26	5221	2	80927	GSBRNA2T00151990001,GSBRNA2T00145954001
GO:BP	mitochondrial electron transport, NADH to ubiquinone	GO:0006120	0.912108	0.0399536	11	5221	1	80927	GSBRNA2T00114725001
GO:BP	amine transport	GO:0015837	0.912108	0.0399536	12	5221	1	80927	GSBRNA2T00133567001
GO:BP	regulation of hormone levels	GO:0010817	0.912108	0.0399536	57	5221	4	80927	GSBRNA2T00130502001,GSBRNA2T00012900001,GSBRNA2T00151990001,GSBRNA2T00145954001
GO:BP	ribonucleoprotein complex export from nucleus	GO:0071426	0.912108	0.0399536	27	5221	2	80927	GSBRNA2T00009905001,GSBRNA2T00018529001
GO:BP	posttranscriptional regulation of gene expression	GO:0010608	0.912108	0.0399536	57	5221	4	80927	GSBRNA2T00085609001,GSBRNA2T00139380001,GSBRNA2T00078576001,GSBRNA2T00006418001
GO:BP	positive regulation of phosphorus metabolic process	GO:0010562	0.912108	0.0399536	28	5221	2	80927	GSBRNA2T00126733001,GSBRNA2T00151747001
GO:BP	L-methionine biosynthetic process	GO:0071265	0.912108	0.0399536	12	5221	1	80927	GSBRNA2T00155874001
GO:BP	response to inorganic substance	GO:0010035	0.912108	0.0399536	123	5221	8	80927	GSBRNA2T00101570001,GSBRNA2T00074877001,GSBRNA2T00035751001,GSBRNA2T00005544001,GSBRNA2T00134984001,GSBRNA2T00074020001,GSBRNA2T00138944001,GSBRNA2T00115838001
GO:BP	ribonucleoprotein complex localization	GO:0071166	0.912108	0.0399536	27	5221	2	80927	GSBRNA2T00009905001,GSBRNA2T00018529001
GO:BP	tetraterpenoid metabolic process	GO:0016108	0.912108	0.0399536	11	5221	1	80927	GSBRNA2T00122142001
GO:BP	tetraterpenoid biosynthetic process	GO:0016109	0.912108	0.0399536	11	5221	1	80927	GSBRNA2T00122142001
GO:BP	negative regulation of flower development	GO:0009910	0.912108	0.0399536	11	5221	1	80927	GSBRNA2T00074697001
GO:BP	carotenoid metabolic process	GO:0016116	0.912108	0.0399536	11	5221	1	80927	GSBRNA2T00122142001
GO:BP	carotenoid biosynthetic process	GO:0016117	0.912108	0.0399536	11	5221	1	80927	GSBRNA2T00122142001
GO:BP	iron-sulfur cluster assembly	GO:0016226	0.912108	0.0399536	43	5221	3	80927	GSBRNA2T00131689001,GSBRNA2T00127321001,GSBRNA2T00018500001
GO:BP	multicellular organismal reproductive process	GO:0048609	0.912108	0.0399536	28	5221	2	80927	GSBRNA2T00095233001,GSBRNA2T00109534001
GO:BP	DNA repair	GO:0006281	0.912108	0.0399536	374	5221	24	80927	GSBRNA2T00070991001,GSBRNA2T00144461001,GSBRNA2T00065365001,GSBRNA2T00040186001,GSBRNA2T00105445001,GSBRNA2T00105501001,GSBRNA2T00068464001,GSBRNA2T00129222001,GSBRNA2T00129306001,GSBRNA2T00134692001,GSBRNA2T00134994001,GSBRNA2T00078557001,GSBRNA2T00109297001,GSBRNA2T00094368001,GSBRNA2T00094380001,GSBRNA2T00146122001,GSBRNA2T00009080001,GSBRNA2T00153973001,GSBRNA2T00099228001,GSBRNA2T00149038001…
GO:BP	purine nucleoside triphosphate metabolic process	GO:0009144	0.912108	0.0399536	107	5221	7	80927	GSBRNA2T00080785001,GSBRNA2T00080784001,GSBRNA2T00085766001,GSBRNA2T00000119001,GSBRNA2T00151907001,GSBRNA2T00119832001,GSBRNA2T00115611001
GO:BP	cell morphogenesis	GO:0000902	0.912108	0.0399536	44	5221	3	80927	GSBRNA2T00032758001,GSBRNA2T00151742001,GSBRNA2T00151734001
GO:BP	gamete generation	GO:0007276	0.912108	0.0399536	27	5221	2	80927	GSBRNA2T00095233001,GSBRNA2T00109534001
GO:BP	quinone metabolic process	GO:1901661	0.912108	0.0399536	26	5221	2	80927	GSBRNA2T00079573001,GSBRNA2T00014764001
GO:BP	ribose phosphate biosynthetic process	GO:0046390	0.912108	0.0399536	217	5221	14	80927	GSBRNA2T00009885001,GSBRNA2T00080785001,GSBRNA2T00080784001,GSBRNA2T00156878001,GSBRNA2T00031131001,GSBRNA2T00105714001,GSBRNA2T00085766001,GSBRNA2T00074672001,GSBRNA2T00000119001,GSBRNA2T00151907001,GSBRNA2T00119832001,GSBRNA2T00128475001,GSBRNA2T00115611001,GSBRNA2T00109670001
GO:BP	positive regulation of protein phosphorylation	GO:0001934	0.912108	0.0399536	26	5221	2	80927	GSBRNA2T00126733001,GSBRNA2T00151747001
GO:BP	quinone biosynthetic process	GO:1901663	0.912108	0.0399536	26	5221	2	80927	GSBRNA2T00079573001,GSBRNA2T00014764001
GO:BP	regulation of anion transmembrane transport	GO:1903959	0.912108	0.0399536	12	5221	1	80927	GSBRNA2T00133567001
GO:BP	cell recognition	GO:0008037	0.912108	0.0399536	89	5221	6	80927	GSBRNA2T00131588001,GSBRNA2T00060148001,GSBRNA2T00057109001,GSBRNA2T00109328001,GSBRNA2T00102191001,GSBRNA2T00102188001
GO:BP	metallo-sulfur cluster assembly	GO:0031163	0.912108	0.0399536	43	5221	3	80927	GSBRNA2T00131689001,GSBRNA2T00127321001,GSBRNA2T00018500001
GO:BP	multicellular organism reproduction	GO:0032504	0.912108	0.0399536	28	5221	2	80927	GSBRNA2T00095233001,GSBRNA2T00109534001
GO:BP	male meiotic nuclear division	GO:0007140	0.912108	0.0399536	26	5221	2	80927	GSBRNA2T00095233001,GSBRNA2T00109534001
GO:BP	establishment of protein localization to membrane	GO:0090150	0.912108	0.0399536	106	5221	7	80927	GSBRNA2T00061975001,GSBRNA2T00050074001,GSBRNA2T00115267001,GSBRNA2T00052545001,GSBRNA2T00062226001,GSBRNA2T00068198001,GSBRNA2T00021988001
GO:BP	regulation of amino acid export	GO:0080143	0.912108	0.0399536	12	5221	1	80927	GSBRNA2T00133567001
GO:BP	regulation of amino acid transport	GO:0051955	0.912108	0.0399536	12	5221	1	80927	GSBRNA2T00133567001
GO:BP	pyrimidine nucleoside monophosphate metabolic process	GO:0009129	0.912108	0.0399536	27	5221	2	80927	GSBRNA2T00009885001,GSBRNA2T00074672001
GO:BP	pyrimidine nucleoside monophosphate biosynthetic process	GO:0009130	0.912108	0.0399536	27	5221	2	80927	GSBRNA2T00009885001,GSBRNA2T00074672001
GO:BP	RNA export from nucleus	GO:0006405	0.912108	0.0399536	28	5221	2	80927	GSBRNA2T00009905001,GSBRNA2T00018529001
GO:BP	cellular component biogenesis	GO:0044085	0.912108	0.0399536	1041	5221	67	80927	GSBRNA2T00039090001,GSBRNA2T00111677001,GSBRNA2T00056362001,GSBRNA2T00149613001,GSBRNA2T00033401001,GSBRNA2T00036794001,GSBRNA2T00110169001,GSBRNA2T00130716001,GSBRNA2T00130293001,GSBRNA2T00091722001,GSBRNA2T00122137001,GSBRNA2T00034777001,GSBRNA2T00156150001,GSBRNA2T00121890001,GSBRNA2T00133018001,GSBRNA2T00095288001,GSBRNA2T00154544001,GSBRNA2T00001997001,GSBRNA2T00131689001,GSBRNA2T00094842001…
GO:BP	DNA methylation or demethylation	GO:0044728	0.912108	0.0399536	27	5221	2	80927	GSBRNA2T00000801001,GSBRNA2T00079238001
GO:BP	regulation of amine transport	GO:0051952	0.912108	0.0399536	12	5221	1	80927	GSBRNA2T00133567001
GO:BP	microtubule cytoskeleton organization	GO:0000226	0.912704	0.0396702	124	5221	8	80927	GSBRNA2T00126733001,GSBRNA2T00094842001,GSBRNA2T00038392001,GSBRNA2T00147458001,GSBRNA2T00078606001,GSBRNA2T00142224001,GSBRNA2T00151747001,GSBRNA2T00151740001
GO:BP	indolalkylamine biosynthetic process	GO:0046219	0.930563	0.0312542	29	5221	2	80927	GSBRNA2T00114799001,GSBRNA2T00018448001
GO:BP	pyrimidine nucleobase metabolic process	GO:0006206	0.930563	0.0312542	29	5221	2	80927	GSBRNA2T00072696001,GSBRNA2T00145935001
GO:BP	tryptophan biosynthetic process	GO:0000162	0.930563	0.0312542	29	5221	2	80927	GSBRNA2T00114799001,GSBRNA2T00018448001
GO:BP	indole-containing compound biosynthetic process	GO:0042435	0.930563	0.0312542	29	5221	2	80927	GSBRNA2T00114799001,GSBRNA2T00018448001
GO:BP	regulation of cellular process	GO:0050794	0.930563	0.0312542	5371	5221	344	80927	GSBRNA2T00068585001,GSBRNA2T00134310001,GSBRNA2T00134581001,GSBRNA2T00081585001,GSBRNA2T00083129001,GSBRNA2T00126266001,GSBRNA2T00111677001,GSBRNA2T00026805001,GSBRNA2T00026833001,GSBRNA2T00042253001,GSBRNA2T00054057001,GSBRNA2T00071333001,GSBRNA2T00044326001,GSBRNA2T00044371001,GSBRNA2T00085609001,GSBRNA2T00104998001,GSBRNA2T00149561001,GSBRNA2T00149587001,GSBRNA2T00073188001,GSBRNA2T00130984001…
GO:BP	pyrimidine nucleobase biosynthetic process	GO:0019856	0.930563	0.0312542	29	5221	2	80927	GSBRNA2T00072696001,GSBRNA2T00145935001
GO:BP	translation	GO:0006412	0.933993	0.0296563	1586	5221	101	80927	GSBRNA2T00134579001,GSBRNA2T00094614001,GSBRNA2T00044826001,GSBRNA2T00111722001,GSBRNA2T00005823001,GSBRNA2T00123113001,GSBRNA2T00085609001,GSBRNA2T00120631001,GSBRNA2T00110274001,GSBRNA2T00129829001,GSBRNA2T00009904001,GSBRNA2T00009872001,GSBRNA2T00080811001,GSBRNA2T00122308001,GSBRNA2T00136425001,GSBRNA2T00034680001,GSBRNA2T00074507001,GSBRNA2T00058164001,GSBRNA2T00121890001,GSBRNA2T00144571001…
GO:BP	nitrogen compound transport	GO:0071705	0.934096	0.0296084	1088	5221	69	80927	GSBRNA2T00134581001,GSBRNA2T00134123001,GSBRNA2T00126293001,GSBRNA2T00055327001,GSBRNA2T00130924001,GSBRNA2T00129903001,GSBRNA2T00009905001,GSBRNA2T00080814001,GSBRNA2T00135968001,GSBRNA2T00074564001,GSBRNA2T00074538001,GSBRNA2T00058116001,GSBRNA2T00121796001,GSBRNA2T00016053001,GSBRNA2T00035725001,GSBRNA2T00035726001,GSBRNA2T00065351001,GSBRNA2T00021231001,GSBRNA2T00036895001,GSBRNA2T00050074001…
GO:BP	chloroplast fission	GO:0010020	0.934096	0.0296084	13	5221	1	80927	GSBRNA2T00035679001
GO:BP	salicylic acid mediated signaling pathway	GO:0009863	0.934096	0.0296084	13	5221	1	80927	GSBRNA2T00071535001
GO:BP	cellular response to salicylic acid stimulus	GO:0071446	0.934096	0.0296084	13	5221	1	80927	GSBRNA2T00071535001
GO:BP	clathrin coat assembly	GO:0048268	0.934096	0.0296084	46	5221	3	80927	GSBRNA2T00149613001,GSBRNA2T00157536001,GSBRNA2T00065635001
GO:BP	negative regulation of cellular macromolecule biosynthetic process	GO:2000113	0.934096	0.0296084	111	5221	7	80927	GSBRNA2T00032489001,GSBRNA2T00064188001,GSBRNA2T00018234001,GSBRNA2T00078683001,GSBRNA2T00151926001,GSBRNA2T00080939001,GSBRNA2T00018458001
GO:BP	NADH dehydrogenase complex assembly	GO:0010257	0.934096	0.0296084	13	5221	1	80927	GSBRNA2T00034922001
GO:BP	jasmonic acid metabolic process	GO:0009694	0.934096	0.0296084	13	5221	1	80927	GSBRNA2T00037261001
GO:BP	plastid fission	GO:0043572	0.934096	0.0296084	13	5221	1	80927	GSBRNA2T00035679001
GO:BP	ATP-dependent chromatin remodeling	GO:0043044	0.934096	0.0296084	13	5221	1	80927	GSBRNA2T00114734001
GO:BP	mitochondrial respiratory chain complex I assembly	GO:0032981	0.934096	0.0296084	13	5221	1	80927	GSBRNA2T00034922001
GO:BP	glutamine family amino acid catabolic process	GO:0009065	0.934096	0.0296084	13	5221	1	80927	GSBRNA2T00112701001
GO:BP	positive regulation of translation	GO:0045727	0.934096	0.0296084	13	5221	1	80927	GSBRNA2T00139380001
GO:BP	cell division	GO:0051301	0.934096	0.0296084	78	5221	5	80927	GSBRNA2T00088735001,GSBRNA2T00074697001,GSBRNA2T00073904001,GSBRNA2T00032758001,GSBRNA2T00038614001
GO:BP	regulation of salicylic acid mediated signaling pathway	GO:2000031	0.934096	0.0296084	13	5221	1	80927	GSBRNA2T00071535001
GO:BP	disaccharide biosynthetic process	GO:0046351	0.934096	0.0296084	62	5221	4	80927	GSBRNA2T00118912001,GSBRNA2T00090182001,GSBRNA2T00146970001,GSBRNA2T00077498001
GO:BP	positive regulation of cellular amide metabolic process	GO:0034250	0.934096	0.0296084	13	5221	1	80927	GSBRNA2T00139380001
GO:BP	spliceosomal snRNP assembly	GO:0000387	0.938406	0.0276094	30	5221	2	80927	GSBRNA2T00125208001,GSBRNA2T00018491001
GO:BP	vacuole organization	GO:0007033	0.938406	0.0276094	30	5221	2	80927	GSBRNA2T00042892001,GSBRNA2T00153988001
GO:BP	cellular component assembly	GO:0022607	0.938406	0.0276094	666	5221	42	80927	GSBRNA2T00111677001,GSBRNA2T00149613001,GSBRNA2T00033401001,GSBRNA2T00036794001,GSBRNA2T00110169001,GSBRNA2T00130293001,GSBRNA2T00034777001,GSBRNA2T00156150001,GSBRNA2T00121890001,GSBRNA2T00133018001,GSBRNA2T00095288001,GSBRNA2T00131689001,GSBRNA2T00094842001,GSBRNA2T00117730001,GSBRNA2T00127321001,GSBRNA2T00030928001,GSBRNA2T00134966001,GSBRNA2T00134833001,GSBRNA2T00157536001,GSBRNA2T00100434001…
GO:BP	protein-containing complex localization	GO:0031503	0.938406	0.0276094	30	5221	2	80927	GSBRNA2T00009905001,GSBRNA2T00018529001
GO:BP	nicotianamine metabolic process	GO:0030417	0.947992	0.0231954	14	5221	1	80927	GSBRNA2T00157431001
GO:BP	cellular response to nitrate	GO:0071249	0.947992	0.0231954	14	5221	1	80927	GSBRNA2T00074877001
GO:BP	reactive oxygen species metabolic process	GO:0072593	0.947992	0.0231954	242	5221	15	80927	GSBRNA2T00131028001,GSBRNA2T00009862001,GSBRNA2T00035751001,GSBRNA2T00061996001,GSBRNA2T00051670001,GSBRNA2T00043214001,GSBRNA2T00157525001,GSBRNA2T00093204001,GSBRNA2T00056539001,GSBRNA2T00031244001,GSBRNA2T00128468001,GSBRNA2T00146102001,GSBRNA2T00099596001,GSBRNA2T00121481001,GSBRNA2T00153039001
GO:BP	ammonium transmembrane transport	GO:0072488	0.947992	0.0231954	14	5221	1	80927	GSBRNA2T00058116001
GO:BP	cellular response to DNA damage stimulus	GO:0006974	0.947992	0.0231954	386	5221	24	80927	GSBRNA2T00070991001,GSBRNA2T00144461001,GSBRNA2T00065365001,GSBRNA2T00040186001,GSBRNA2T00105445001,GSBRNA2T00105501001,GSBRNA2T00068464001,GSBRNA2T00129222001,GSBRNA2T00129306001,GSBRNA2T00134692001,GSBRNA2T00134994001,GSBRNA2T00078557001,GSBRNA2T00109297001,GSBRNA2T00094368001,GSBRNA2T00094380001,GSBRNA2T00146122001,GSBRNA2T00009080001,GSBRNA2T00153973001,GSBRNA2T00099228001,GSBRNA2T00149038001…
GO:BP	peptide biosynthetic process	GO:0043043	0.947992	0.0231954	1612	5221	102	80927	GSBRNA2T00134579001,GSBRNA2T00094614001,GSBRNA2T00044826001,GSBRNA2T00111722001,GSBRNA2T00005823001,GSBRNA2T00123113001,GSBRNA2T00085609001,GSBRNA2T00120631001,GSBRNA2T00110274001,GSBRNA2T00129829001,GSBRNA2T00009904001,GSBRNA2T00009872001,GSBRNA2T00080811001,GSBRNA2T00122308001,GSBRNA2T00136425001,GSBRNA2T00034680001,GSBRNA2T00074507001,GSBRNA2T00058164001,GSBRNA2T00121890001,GSBRNA2T00144571001…
GO:BP	ammonium transport	GO:0015696	0.947992	0.0231954	14	5221	1	80927	GSBRNA2T00058116001
GO:BP	protoporphyrinogen IX biosynthetic process	GO:0006782	0.947992	0.0231954	14	5221	1	80927	GSBRNA2T00105410001
GO:BP	cellular response to reactive nitrogen species	GO:1902170	0.947992	0.0231954	14	5221	1	80927	GSBRNA2T00074877001
GO:BP	auxin transport	GO:0060918	0.947992	0.0231954	14	5221	1	80927	GSBRNA2T00130502001
GO:BP	cell-cell signaling involved in cell fate commitment	GO:0045168	0.947992	0.0231954	14	5221	1	80927	GSBRNA2T00086964001
GO:BP	Golgi organization	GO:0007030	0.947992	0.0231954	14	5221	1	80927	GSBRNA2T00115918001
GO:BP	hormone transport	GO:0009914	0.947992	0.0231954	14	5221	1	80927	GSBRNA2T00130502001
GO:BP	calcium ion transmembrane transport	GO:0070588	0.947992	0.0231954	48	5221	3	80927	GSBRNA2T00127402001,GSBRNA2T00093028001,GSBRNA2T00065618001
GO:BP	organelle fission	GO:0048285	0.947992	0.0231954	146	5221	9	80927	GSBRNA2T00095233001,GSBRNA2T00035679001,GSBRNA2T00074919001,GSBRNA2T00151962001,GSBRNA2T00071122001,GSBRNA2T00099180001,GSBRNA2T00149229001,GSBRNA2T00154913001,GSBRNA2T00109534001
GO:BP	photorespiration	GO:0009853	0.947992	0.0231954	14	5221	1	80927	GSBRNA2T00098486001
GO:BP	response to wounding	GO:0009611	0.947992	0.0231954	14	5221	1	80927	GSBRNA2T00037261001
GO:BP	tricarboxylic acid biosynthetic process	GO:0072351	0.947992	0.0231954	14	5221	1	80927	GSBRNA2T00157431001
GO:BP	S-adenosylmethionine metabolic process	GO:0046500	0.947992	0.0231954	14	5221	1	80927	GSBRNA2T00018367001
GO:BP	cell-cell signaling	GO:0007267	0.947992	0.0231954	14	5221	1	80927	GSBRNA2T00086964001
GO:BP	inorganic anion transmembrane transport	GO:0098661	0.947992	0.0231954	47	5221	3	80927	GSBRNA2T00081088001,GSBRNA2T00015696001,GSBRNA2T00018454001
GO:BP	protoporphyrinogen IX metabolic process	GO:0046501	0.947992	0.0231954	14	5221	1	80927	GSBRNA2T00105410001
GO:BP	nicotianamine biosynthetic process	GO:0030418	0.947992	0.0231954	14	5221	1	80927	GSBRNA2T00157431001
GO:BP	glutathione biosynthetic process	GO:0006750	0.947992	0.0231954	14	5221	1	80927	GSBRNA2T00109460001
GO:BP	cytokinesis	GO:0000910	0.947992	0.0231954	31	5221	2	80927	GSBRNA2T00073904001,GSBRNA2T00038614001
GO:BP	regulation of cell cycle process	GO:0010564	0.95406	0.0204244	98	5221	6	80927	GSBRNA2T00126733001,GSBRNA2T00116951001,GSBRNA2T00155346001,GSBRNA2T00152670001,GSBRNA2T00078704001,GSBRNA2T00151747001
GO:BP	protein modification by small protein conjugation	GO:0032446	0.9578	0.0187253	436	5221	27	80927	GSBRNA2T00085673001,GSBRNA2T00085669001,GSBRNA2T00047296001,GSBRNA2T00065961001,GSBRNA2T00009874001,GSBRNA2T00136001001,GSBRNA2T00132172001,GSBRNA2T00132171001,GSBRNA2T00142050001,GSBRNA2T00078332001,GSBRNA2T00134859001,GSBRNA2T00136564001,GSBRNA2T00108780001,GSBRNA2T00088793001,GSBRNA2T00088543001,GSBRNA2T00032793001,GSBRNA2T00081910001,GSBRNA2T00151756001,GSBRNA2T00151755001,GSBRNA2T00091551001…
GO:BP	protein-DNA complex assembly	GO:0065004	0.9578	0.0187253	131	5221	8	80927	GSBRNA2T00034777001,GSBRNA2T00133018001,GSBRNA2T00117730001,GSBRNA2T00030928001,GSBRNA2T00134833001,GSBRNA2T00152712001,GSBRNA2T00064742001,GSBRNA2T00064741001
GO:BP	erythrose 4-phosphate/phosphoenolpyruvate family amino acid metabolic process	GO:1902221	0.964161	0.0158503	32	5221	2	80927	GSBRNA2T00105341001,GSBRNA2T00008904001
GO:BP	L-phenylalanine metabolic process	GO:0006558	0.964161	0.0158503	32	5221	2	80927	GSBRNA2T00105341001,GSBRNA2T00008904001
GO:BP	plant organ development	GO:0099402	0.96448	0.0157067	99	5221	6	80927	GSBRNA2T00130502001,GSBRNA2T00101575001,GSBRNA2T00114181001,GSBRNA2T00137449001,GSBRNA2T00124025001,GSBRNA2T00107612001
GO:BP	protein localization	GO:0008104	0.96801	0.0141203	914	5221	57	80927	GSBRNA2T00134581001,GSBRNA2T00134123001,GSBRNA2T00126293001,GSBRNA2T00055327001,GSBRNA2T00130924001,GSBRNA2T00129903001,GSBRNA2T00009905001,GSBRNA2T00080814001,GSBRNA2T00135968001,GSBRNA2T00074538001,GSBRNA2T00121796001,GSBRNA2T00016053001,GSBRNA2T00035725001,GSBRNA2T00035726001,GSBRNA2T00065351001,GSBRNA2T00061975001,GSBRNA2T00021231001,GSBRNA2T00036895001,GSBRNA2T00050074001,GSBRNA2T00137467001…
GO:BP	regulation of immune response	GO:0050776	0.968285	0.0139969	15	5221	1	80927	GSBRNA2T00037261001
GO:BP	cellular response to nitrogen compound	GO:1901699	0.968285	0.0139969	15	5221	1	80927	GSBRNA2T00074877001
GO:BP	mitochondrial electron transport, ubiquinol to cytochrome c	GO:0006122	0.968285	0.0139969	15	5221	1	80927	GSBRNA2T00063873001
GO:BP	regulation of unidimensional cell growth	GO:0051510	0.968285	0.0139969	15	5221	1	80927	GSBRNA2T00151742001
GO:BP	regulation of monopolar cell growth	GO:0051513	0.968285	0.0139969	15	5221	1	80927	GSBRNA2T00151742001
GO:BP	nonribosomal peptide biosynthetic process	GO:0019184	0.968285	0.0139969	15	5221	1	80927	GSBRNA2T00109460001
GO:BP	monopolar cell growth	GO:0042814	0.968285	0.0139969	15	5221	1	80927	GSBRNA2T00151742001
GO:BP	regulation of immune system process	GO:0002682	0.968285	0.0139969	15	5221	1	80927	GSBRNA2T00037261001
GO:BP	regulation of innate immune response	GO:0045088	0.968285	0.0139969	15	5221	1	80927	GSBRNA2T00037261001
GO:BP	regulation of DNA-templated transcription, elongation	GO:0032784	0.968285	0.0139969	15	5221	1	80927	GSBRNA2T00094562001
GO:BP	cell fate commitment	GO:0045165	0.968285	0.0139969	15	5221	1	80927	GSBRNA2T00086964001
GO:BP	regulation of cellular response to stress	GO:0080135	0.968285	0.0139969	15	5221	1	80927	GSBRNA2T00068982001
GO:BP	DNA duplex unwinding	GO:0032508	0.969726	0.0133511	67	5221	4	80927	GSBRNA2T00059083001,GSBRNA2T00040186001,GSBRNA2T00094380001,GSBRNA2T00044423001
GO:BP	regulation of cytoskeleton organization	GO:0051493	0.969726	0.0133511	67	5221	4	80927	GSBRNA2T00126733001,GSBRNA2T00094842001,GSBRNA2T00078606001,GSBRNA2T00151747001
GO:BP	response to oxidative stress	GO:0006979	0.969726	0.0133511	328	5221	20	80927	GSBRNA2T00052894001,GSBRNA2T00131028001,GSBRNA2T00088021001,GSBRNA2T00009862001,GSBRNA2T00137069001,GSBRNA2T00035751001,GSBRNA2T00061996001,GSBRNA2T00051670001,GSBRNA2T00043214001,GSBRNA2T00157525001,GSBRNA2T00093204001,GSBRNA2T00056539001,GSBRNA2T00031244001,GSBRNA2T00128468001,GSBRNA2T00138232001,GSBRNA2T00099596001,GSBRNA2T00103439001,GSBRNA2T00149327001,GSBRNA2T00121481001,GSBRNA2T00153039001
GO:BP	malate transport	GO:0015743	0.970076	0.0131945	33	5221	2	80927	GSBRNA2T00104676001,GSBRNA2T00104678001
GO:BP	dicarboxylic acid transport	GO:0006835	0.970076	0.0131945	33	5221	2	80927	GSBRNA2T00104676001,GSBRNA2T00104678001
GO:BP	C4-dicarboxylate transport	GO:0015740	0.970076	0.0131945	33	5221	2	80927	GSBRNA2T00104676001,GSBRNA2T00104678001
GO:BP	cell cycle process	GO:0022402	0.975987	0.010556	297	5221	18	80927	GSBRNA2T00136259001,GSBRNA2T00126733001,GSBRNA2T00095233001,GSBRNA2T00106946001,GSBRNA2T00116951001,GSBRNA2T00155346001,GSBRNA2T00073904001,GSBRNA2T00152670001,GSBRNA2T00078704001,GSBRNA2T00038614001,GSBRNA2T00151747001,GSBRNA2T00071122001,GSBRNA2T00094368001,GSBRNA2T00154032001,GSBRNA2T00099180001,GSBRNA2T00154913001,GSBRNA2T00109534001,GSBRNA2T00109531001
GO:BP	organophosphate biosynthetic process	GO:0090407	0.984011	0.00700012	558	5221	34	80927	GSBRNA2T00051772001,GSBRNA2T00009885001,GSBRNA2T00080785001,GSBRNA2T00080784001,GSBRNA2T00156369001,GSBRNA2T00156878001,GSBRNA2T00031131001,GSBRNA2T00105714001,GSBRNA2T00085766001,GSBRNA2T00101739001,GSBRNA2T00068996001,GSBRNA2T00069045001,GSBRNA2T00028864001,GSBRNA2T00074672001,GSBRNA2T00000119001,GSBRNA2T00051901001,GSBRNA2T00136679001,GSBRNA2T00024782001,GSBRNA2T00042892001,GSBRNA2T00151781001…
GO:BP	positive regulation of catalytic activity	GO:0043085	0.984011	0.00700012	103	5221	6	80927	GSBRNA2T00126733001,GSBRNA2T00000972001,GSBRNA2T00027321001,GSBRNA2T00151747001,GSBRNA2T00048973001,GSBRNA2T00029473001
GO:BP	glycolytic process through fructose-6-phosphate	GO:0061615	0.984011	0.00700012	16	5221	1	80927	GSBRNA2T00007196001
GO:BP	regulation of photoperiodism, flowering	GO:2000028	0.984011	0.00700012	16	5221	1	80927	GSBRNA2T00052025001
GO:BP	response to salicylic acid	GO:0009751	0.984011	0.00700012	16	5221	1	80927	GSBRNA2T00071535001
GO:BP	protein-DNA complex subunit organization	GO:0071824	0.984011	0.00700012	135	5221	8	80927	GSBRNA2T00034777001,GSBRNA2T00133018001,GSBRNA2T00117730001,GSBRNA2T00030928001,GSBRNA2T00134833001,GSBRNA2T00152712001,GSBRNA2T00064742001,GSBRNA2T00064741001
GO:BP	unidimensional cell growth	GO:0009826	0.984011	0.00700012	16	5221	1	80927	GSBRNA2T00151742001
GO:BP	pollen-pistil interaction	GO:0009875	0.984011	0.00700012	86	5221	5	80927	GSBRNA2T00131588001,GSBRNA2T00060148001,GSBRNA2T00057109001,GSBRNA2T00102191001,GSBRNA2T00102188001
GO:BP	mRNA-containing ribonucleoprotein complex export from nucleus	GO:0071427	0.984011	0.00700012	16	5221	1	80927	GSBRNA2T00009905001
GO:BP	negative regulation of cell death	GO:0060548	0.984011	0.00700012	16	5221	1	80927	GSBRNA2T00067723001
GO:BP	tropism	GO:0009606	0.984011	0.00700012	103	5221	6	80927	GSBRNA2T00107143001,GSBRNA2T00137598001,GSBRNA2T00123748001,GSBRNA2T00134987001,GSBRNA2T00125920001,GSBRNA2T00146110001
GO:BP	DNA geometric change	GO:0032392	0.984011	0.00700012	69	5221	4	80927	GSBRNA2T00059083001,GSBRNA2T00040186001,GSBRNA2T00094380001,GSBRNA2T00044423001
GO:BP	mitotic cell cycle process	GO:1903047	0.984011	0.00700012	103	5221	6	80927	GSBRNA2T00126733001,GSBRNA2T00151747001,GSBRNA2T00071122001,GSBRNA2T00094368001,GSBRNA2T00099180001,GSBRNA2T00154913001
GO:BP	amino acid transmembrane transport	GO:0003333	0.984011	0.00700012	16	5221	1	80927	GSBRNA2T00133567001
GO:BP	recognition of pollen	GO:0048544	0.984011	0.00700012	86	5221	5	80927	GSBRNA2T00131588001,GSBRNA2T00060148001,GSBRNA2T00057109001,GSBRNA2T00102191001,GSBRNA2T00102188001
GO:BP	oligopeptide transport	GO:0006857	0.984011	0.00700012	52	5221	3	80927	GSBRNA2T00001829001,GSBRNA2T00069494001,GSBRNA2T00151913001
GO:BP	positive regulation of cellular component organization	GO:0051130	0.984011	0.00700012	52	5221	3	80927	GSBRNA2T00094842001,GSBRNA2T00139380001,GSBRNA2T00078606001
GO:BP	mRNA export from nucleus	GO:0006406	0.984011	0.00700012	16	5221	1	80927	GSBRNA2T00009905001
GO:BP	regulation of protein-containing complex disassembly	GO:0043244	0.984011	0.00700012	16	5221	1	80927	GSBRNA2T00139380001
GO:BP	cellular macromolecule biosynthetic process	GO:0034645	0.984011	0.00700012	6015	5221	381	80927	GSBRNA2T00134310001,GSBRNA2T00134579001,GSBRNA2T00083129001,GSBRNA2T00094614001,GSBRNA2T00044826001,GSBRNA2T00111722001,GSBRNA2T00005823001,GSBRNA2T00026805001,GSBRNA2T00026833001,GSBRNA2T00042253001,GSBRNA2T00063980001,GSBRNA2T00071333001,GSBRNA2T00044326001,GSBRNA2T00044371001,GSBRNA2T00123011001,GSBRNA2T00123113001,GSBRNA2T00085609001,GSBRNA2T00120631001,GSBRNA2T00056362001,GSBRNA2T00149561001…
GO:BP	mitochondrial transmembrane transport	GO:1990542	0.99425	0.00250459	35	5221	2	80927	GSBRNA2T00032831001,GSBRNA2T00054368001
GO:BP	oligosaccharide biosynthetic process	GO:0009312	0.99425	0.00250459	70	5221	4	80927	GSBRNA2T00118912001,GSBRNA2T00090182001,GSBRNA2T00146970001,GSBRNA2T00077498001
GO:BP	protein transmembrane import into intracellular organelle	GO:0044743	0.99425	0.00250459	35	5221	2	80927	GSBRNA2T00032831001,GSBRNA2T00054368001
GO:BP	proteolysis	GO:0006508	0.997591	0.00104752	1707	5221	106	80927	GSBRNA2T00081601001,GSBRNA2T00111499001,GSBRNA2T00111655001,GSBRNA2T00052918001,GSBRNA2T00091739001,GSBRNA2T00104946001,GSBRNA2T00004540001,GSBRNA2T00022150001,GSBRNA2T00130261001,GSBRNA2T00009836001,GSBRNA2T00009905001,GSBRNA2T00067444001,GSBRNA2T00037127001,GSBRNA2T00005644001,GSBRNA2T00002854001,GSBRNA2T00049098001,GSBRNA2T00081279001,GSBRNA2T00016058001,GSBRNA2T00016109001,GSBRNA2T00000399001…
GO:BP	peptide metabolic process	GO:0006518	0.997591	0.00104752	1691	5221	105	80927	GSBRNA2T00134579001,GSBRNA2T00094614001,GSBRNA2T00044826001,GSBRNA2T00111722001,GSBRNA2T00005823001,GSBRNA2T00123113001,GSBRNA2T00085609001,GSBRNA2T00104946001,GSBRNA2T00120631001,GSBRNA2T00110274001,GSBRNA2T00129829001,GSBRNA2T00009904001,GSBRNA2T00009872001,GSBRNA2T00080811001,GSBRNA2T00122308001,GSBRNA2T00136425001,GSBRNA2T00034680001,GSBRNA2T00074507001,GSBRNA2T00058164001,GSBRNA2T00121890001…
GO:BP	nucleobase biosynthetic process	GO:0046112	0.997591	0.00104752	53	5221	3	80927	GSBRNA2T00072696001,GSBRNA2T00145935001,GSBRNA2T00143476001
GO:BP	regulation of cell growth	GO:0001558	0.998509	0.000647983	17	5221	1	80927	GSBRNA2T00151742001
GO:BP	macromolecule biosynthetic process	GO:0009059	0.998509	0.000647983	6107	5221	386	80927	GSBRNA2T00134310001,GSBRNA2T00134579001,GSBRNA2T00083129001,GSBRNA2T00094614001,GSBRNA2T00044826001,GSBRNA2T00111722001,GSBRNA2T00005823001,GSBRNA2T00026805001,GSBRNA2T00026833001,GSBRNA2T00042253001,GSBRNA2T00063980001,GSBRNA2T00071333001,GSBRNA2T00044326001,GSBRNA2T00044371001,GSBRNA2T00123011001,GSBRNA2T00123113001,GSBRNA2T00085609001,GSBRNA2T00120631001,GSBRNA2T00056362001,GSBRNA2T00149561001…
GO:BP	regulation of anion transport	GO:0044070	0.998509	0.000647983	17	5221	1	80927	GSBRNA2T00133567001
GO:BP	sister chromatid segregation	GO:0000819	0.998509	0.000647983	88	5221	5	80927	GSBRNA2T00136259001,GSBRNA2T00106946001,GSBRNA2T00071122001,GSBRNA2T00099180001,GSBRNA2T00154913001
GO:BP	glycogen biosynthetic process	GO:0005978	0.998509	0.000647983	17	5221	1	80927	GSBRNA2T00114672001
GO:BP	male meiosis II	GO:0007142	0.998509	0.000647983	17	5221	1	80927	GSBRNA2T00095233001
GO:BP	regulation of post-embryonic development	GO:0048580	1	3.65213e-08	79	5221	4	80927	GSBRNA2T00052025001,GSBRNA2T00074697001,GSBRNA2T00146015001,GSBRNA2T00146011001
GO:BP	regulation of cellular macromolecule biosynthetic process	GO:2000112	1	3.65213e-08	3410	5221	193	80927	GSBRNA2T00134310001,GSBRNA2T00083129001,GSBRNA2T00026805001,GSBRNA2T00026833001,GSBRNA2T00042253001,GSBRNA2T00071333001,GSBRNA2T00044326001,GSBRNA2T00044371001,GSBRNA2T00085609001,GSBRNA2T00149561001,GSBRNA2T00149587001,GSBRNA2T00073188001,GSBRNA2T00130550001,GSBRNA2T00130641001,GSBRNA2T00101575001,GSBRNA2T00129941001,GSBRNA2T00009905001,GSBRNA2T00080795001,GSBRNA2T00080768001,GSBRNA2T00080799001…
GO:BP	response to steroid hormone	GO:0048545	1	3.65213e-08	32	5221	1	80927	GSBRNA2T00083129001
GO:BP	vesicle docking	GO:0048278	1	3.65213e-08	35	5221	1	80927	GSBRNA2T00151527001
GO:BP	positive regulation of supramolecular fiber organization	GO:1902905	1	3.65213e-08	40	5221	2	80927	GSBRNA2T00094842001,GSBRNA2T00078606001
GO:BP	meiotic cell cycle process	GO:1903046	1	3.65213e-08	49	5221	2	80927	GSBRNA2T00095233001,GSBRNA2T00109534001
GO:BP	negative regulation of nucleic acid-templated transcription	GO:1903507	1	3.65213e-08	143	5221	8	80927	GSBRNA2T00032489001,GSBRNA2T00064188001,GSBRNA2T00018234001,GSBRNA2T00078683001,GSBRNA2T00151926001,GSBRNA2T00080939001,GSBRNA2T00018458001,GSBRNA2T00125642001
GO:BP	regulation of multicellular organismal development	GO:2000026	1	3.65213e-08	82	5221	4	80927	GSBRNA2T00052025001,GSBRNA2T00074697001,GSBRNA2T00146015001,GSBRNA2T00146011001
GO:BP	regulation of nucleic acid-templated transcription	GO:1903506	1	3.65213e-08	3336	5221	186	80927	GSBRNA2T00134310001,GSBRNA2T00083129001,GSBRNA2T00026805001,GSBRNA2T00026833001,GSBRNA2T00042253001,GSBRNA2T00071333001,GSBRNA2T00044326001,GSBRNA2T00044371001,GSBRNA2T00149561001,GSBRNA2T00149587001,GSBRNA2T00073188001,GSBRNA2T00130550001,GSBRNA2T00130641001,GSBRNA2T00101575001,GSBRNA2T00129941001,GSBRNA2T00009905001,GSBRNA2T00080795001,GSBRNA2T00080768001,GSBRNA2T00080799001,GSBRNA2T00010277001…
GO:BP	negative regulation of cellular process	GO:0048523	1	3.65213e-08	309	5221	13	80927	GSBRNA2T00032489001,GSBRNA2T00067723001,GSBRNA2T00064188001,GSBRNA2T00018234001,GSBRNA2T00000087001,GSBRNA2T00078683001,GSBRNA2T00074126001,GSBRNA2T00151926001,GSBRNA2T00154032001,GSBRNA2T00080939001,GSBRNA2T00018458001,GSBRNA2T00125642001,GSBRNA2T00109531001
GO:BP	negative regulation of post-embryonic development	GO:0048581	1	3.65213e-08	19	5221	1	80927	GSBRNA2T00074697001
GO:BP	negative regulation of biological process	GO:0048519	1	3.65213e-08	457	5221	18	80927	GSBRNA2T00032489001,GSBRNA2T00067723001,GSBRNA2T00064188001,GSBRNA2T00078343001,GSBRNA2T00018234001,GSBRNA2T00074697001,GSBRNA2T00062085001,GSBRNA2T00000087001,GSBRNA2T00078683001,GSBRNA2T00078576001,GSBRNA2T00074126001,GSBRNA2T00151926001,GSBRNA2T00154032001,GSBRNA2T00080939001,GSBRNA2T00018458001,GSBRNA2T00125642001,GSBRNA2T00109440001,GSBRNA2T00109531001
GO:BP	plant organ morphogenesis	GO:1905392	1	3.65213e-08	19	5221	1	80927	GSBRNA2T00114181001
GO:BP	carboxylic acid transmembrane transport	GO:1905039	1	3.65213e-08	28	5221	1	80927	GSBRNA2T00133567001
GO:BP	autophagosome organization	GO:1905037	1	3.65213e-08	20	5221	1	80927	GSBRNA2T00153988001
GO:BP	organic acid transmembrane transport	GO:1903825	1	3.65213e-08	28	5221	1	80927	GSBRNA2T00133567001
GO:BP	regulation of supramolecular fiber organization	GO:1902903	1	3.65213e-08	44	5221	2	80927	GSBRNA2T00094842001,GSBRNA2T00078606001
GO:BP	rhythmic process	GO:0048511	1	3.65213e-08	47	5221	1	80927	GSBRNA2T00134680001
GO:BP	cellular response to brassinosteroid stimulus	GO:0071367	1	3.65213e-08	33	5221	1	80927	GSBRNA2T00083129001
GO:BP	developmental growth	GO:0048589	1	3.65213e-08	46	5221	1	80927	GSBRNA2T00151742001
GO:BP	pyridine-containing compound biosynthetic process	GO:0072525	1	3.65213e-08	42	5221	1	80927	GSBRNA2T00122385001
GO:BP	membrane fusion	GO:0061025	1	3.65213e-08	70	5221	1	80927	GSBRNA2T00065351001
GO:BP	membrane organization	GO:0061024	1	3.65213e-08	159	5221	4	80927	GSBRNA2T00095239001,GSBRNA2T00065351001,GSBRNA2T00050074001,GSBRNA2T00115267001
GO:BP	developmental growth involved in morphogenesis	GO:0060560	1	3.65213e-08	20	5221	1	80927	GSBRNA2T00151742001
GO:BP	regulation of macromolecule metabolic process	GO:0060255	1	3.65213e-08	3970	5221	230	80927	GSBRNA2T00134310001,GSBRNA2T00083129001,GSBRNA2T00026805001,GSBRNA2T00026833001,GSBRNA2T00042253001,GSBRNA2T00071333001,GSBRNA2T00044326001,GSBRNA2T00044371001,GSBRNA2T00085609001,GSBRNA2T00149561001,GSBRNA2T00149587001,GSBRNA2T00073188001,GSBRNA2T00130550001,GSBRNA2T00130641001,GSBRNA2T00065864001,GSBRNA2T00101575001,GSBRNA2T00129941001,GSBRNA2T00009905001,GSBRNA2T00080795001,GSBRNA2T00080768001…
GO:BP	establishment of protein localization to mitochondrion	GO:0072655	1	3.65213e-08	72	5221	4	80927	GSBRNA2T00050074001,GSBRNA2T00032831001,GSBRNA2T00115267001,GSBRNA2T00054368001
GO:BP	nucleobase-containing small molecule metabolic process	GO:0055086	1	3.65213e-08	691	5221	37	80927	GSBRNA2T00051772001,GSBRNA2T00009885001,GSBRNA2T00080785001,GSBRNA2T00080784001,GSBRNA2T00135480001,GSBRNA2T00072696001,GSBRNA2T00156878001,GSBRNA2T00093561001,GSBRNA2T00031131001,GSBRNA2T00105714001,GSBRNA2T00085766001,GSBRNA2T00069045001,GSBRNA2T00028864001,GSBRNA2T00074672001,GSBRNA2T00000119001,GSBRNA2T00033282001,GSBRNA2T00146469001,GSBRNA2T00134657001,GSBRNA2T00134656001,GSBRNA2T00035283001…
GO:BP	regulation of primary metabolic process	GO:0080090	1	3.65213e-08	3673	5221	197	80927	GSBRNA2T00134310001,GSBRNA2T00081585001,GSBRNA2T00083129001,GSBRNA2T00026805001,GSBRNA2T00026833001,GSBRNA2T00042253001,GSBRNA2T00071333001,GSBRNA2T00044326001,GSBRNA2T00044371001,GSBRNA2T00085609001,GSBRNA2T00149561001,GSBRNA2T00149587001,GSBRNA2T00073188001,GSBRNA2T00130550001,GSBRNA2T00130641001,GSBRNA2T00101575001,GSBRNA2T00129941001,GSBRNA2T00009905001,GSBRNA2T00080795001,GSBRNA2T00080768001…
GO:BP	CAAX-box protein maturation	GO:0080120	1	3.65213e-08	28	5221	1	80927	GSBRNA2T00091223001
GO:BP	regulation of response to stress	GO:0080134	1	3.65213e-08	59	5221	3	80927	GSBRNA2T00068982001,GSBRNA2T00037261001,GSBRNA2T00071535001
GO:BP	pyridine-containing compound metabolic process	GO:0072524	1	3.65213e-08	42	5221	1	80927	GSBRNA2T00122385001
GO:BP	establishment of protein localization to mitochondrial membrane	GO:0090151	1	3.65213e-08	45	5221	2	80927	GSBRNA2T00050074001,GSBRNA2T00115267001
GO:BP	nucleic acid phosphodiester bond hydrolysis	GO:0090305	1	3.65213e-08	236	5221	7	80927	GSBRNA2T00035759001,GSBRNA2T00086710001,GSBRNA2T00078576001,GSBRNA2T00145608001,GSBRNA2T00079038001,GSBRNA2T00069071001,GSBRNA2T00018469001
GO:BP	regulation of endopeptidase activity	GO:0052548	1	3.65213e-08	53	5221	2	80927	GSBRNA2T00000087001,GSBRNA2T00074126001
GO:BP	regulation of peptidase activity	GO:0052547	1	3.65213e-08	53	5221	2	80927	GSBRNA2T00000087001,GSBRNA2T00074126001
GO:BP	regulation of cell cycle	GO:0051726	1	3.65213e-08	182	5221	10	80927	GSBRNA2T00126733001,GSBRNA2T00116951001,GSBRNA2T00155346001,GSBRNA2T00152670001,GSBRNA2T00078704001,GSBRNA2T00151747001,GSBRNA2T00154032001,GSBRNA2T00080030001,GSBRNA2T00018504001,GSBRNA2T00109531001
GO:BP	RNA phosphodiester bond hydrolysis	GO:0090501	1	3.65213e-08	167	5221	5	80927	GSBRNA2T00035759001,GSBRNA2T00145608001,GSBRNA2T00079038001,GSBRNA2T00069071001,GSBRNA2T00018469001
GO:BP	RNA phosphodiester bond hydrolysis, endonucleolytic	GO:0090502	1	3.65213e-08	120	5221	2	80927	GSBRNA2T00079038001,GSBRNA2T00069071001
GO:BP	RNA phosphodiester bond hydrolysis, exonucleolytic	GO:0090503	1	3.65213e-08	21	5221	1	80927	GSBRNA2T00018469001
GO:BP	plant epidermis development	GO:0090558	1	3.65213e-08	34	5221	1	80927	GSBRNA2T00064199001
GO:BP	response to other organism	GO:0051707	1	3.65213e-08	139	5221	5	80927	GSBRNA2T00110278001,GSBRNA2T00037261001,GSBRNA2T00151943001,GSBRNA2T00114665001,GSBRNA2T00109484001
GO:BP	multi-organism process	GO:0051704	1	3.65213e-08	148	5221	8	80927	GSBRNA2T00095233001,GSBRNA2T00131588001,GSBRNA2T00060148001,GSBRNA2T00057109001,GSBRNA2T00109328001,GSBRNA2T00102191001,GSBRNA2T00102188001,GSBRNA2T00109534001
GO:BP	nucleic acid metabolic process	GO:0090304	1	3.65213e-08	5564	5221	308	80927	GSBRNA2T00134310001,GSBRNA2T00134537001,GSBRNA2T00083129001,GSBRNA2T00039090001,GSBRNA2T00111781001,GSBRNA2T00005823001,GSBRNA2T00026805001,GSBRNA2T00026833001,GSBRNA2T00042253001,GSBRNA2T00063980001,GSBRNA2T00071333001,GSBRNA2T00044326001,GSBRNA2T00044371001,GSBRNA2T00123113001,GSBRNA2T00120631001,GSBRNA2T00149561001,GSBRNA2T00149479001,GSBRNA2T00149587001,GSBRNA2T00073188001,GSBRNA2T00110274001…
GO:BP	purine-containing compound biosynthetic process	GO:0072522	1	3.65213e-08	233	5221	11	80927	GSBRNA2T00080785001,GSBRNA2T00080784001,GSBRNA2T00135480001,GSBRNA2T00085766001,GSBRNA2T00000119001,GSBRNA2T00035283001,GSBRNA2T00140522001,GSBRNA2T00151907001,GSBRNA2T00119832001,GSBRNA2T00115611001,GSBRNA2T00143476001
GO:BP	meiosis II cell cycle process	GO:0061983	1	3.65213e-08	18	5221	1	80927	GSBRNA2T00095233001
GO:BP	purine-containing compound metabolic process	GO:0072521	1	3.65213e-08	455	5221	21	80927	GSBRNA2T00080785001,GSBRNA2T00080784001,GSBRNA2T00135480001,GSBRNA2T00093561001,GSBRNA2T00085766001,GSBRNA2T00028864001,GSBRNA2T00000119001,GSBRNA2T00146469001,GSBRNA2T00134657001,GSBRNA2T00134656001,GSBRNA2T00035283001,GSBRNA2T00007196001,GSBRNA2T00150980001,GSBRNA2T00140522001,GSBRNA2T00151907001,GSBRNA2T00119832001,GSBRNA2T00115611001,GSBRNA2T00143476001,GSBRNA2T00068677001,GSBRNA2T00141638001…
GO:BP	cellular response to auxin stimulus	GO:0071365	1	3.65213e-08	187	5221	8	80927	GSBRNA2T00130550001,GSBRNA2T00151978001,GSBRNA2T00151979001,GSBRNA2T00112376001,GSBRNA2T00037198001,GSBRNA2T00146165001,GSBRNA2T00121086001,GSBRNA2T00139470001
GO:BP	cellular response to steroid hormone stimulus	GO:0071383	1	3.65213e-08	32	5221	1	80927	GSBRNA2T00083129001
GO:BP	cellular response to organic substance	GO:0071310	1	3.65213e-08	251	5221	11	80927	GSBRNA2T00083129001,GSBRNA2T00130550001,GSBRNA2T00037261001,GSBRNA2T00151978001,GSBRNA2T00151979001,GSBRNA2T00112376001,GSBRNA2T00071535001,GSBRNA2T00037198001,GSBRNA2T00146165001,GSBRNA2T00121086001,GSBRNA2T00139470001
GO:BP	cellular response to lipid	GO:0071396	1	3.65213e-08	43	5221	1	80927	GSBRNA2T00083129001
GO:BP	cellular response to organic cyclic compound	GO:0071407	1	3.65213e-08	46	5221	2	80927	GSBRNA2T00083129001,GSBRNA2T00071535001
GO:BP	cellular response to oxygen radical	GO:0071450	1	3.65213e-08	29	5221	1	80927	GSBRNA2T00035751001
GO:BP	cellular response to superoxide	GO:0071451	1	3.65213e-08	29	5221	1	80927	GSBRNA2T00035751001
GO:BP	cellular response to endogenous stimulus	GO:0071495	1	3.65213e-08	238	5221	10	80927	GSBRNA2T00083129001,GSBRNA2T00130550001,GSBRNA2T00037261001,GSBRNA2T00151978001,GSBRNA2T00151979001,GSBRNA2T00112376001,GSBRNA2T00037198001,GSBRNA2T00146165001,GSBRNA2T00121086001,GSBRNA2T00139470001
GO:BP	zinc ion transmembrane transport	GO:0071577	1	3.65213e-08	31	5221	1	80927	GSBRNA2T00113869001
GO:BP	CAAX-box protein processing	GO:0071586	1	3.65213e-08	28	5221	1	80927	GSBRNA2T00091223001
GO:BP	organelle assembly	GO:0070925	1	3.65213e-08	74	5221	2	80927	GSBRNA2T00057321001,GSBRNA2T00153988001
GO:BP	cellular response to chemical stimulus	GO:0070887	1	3.65213e-08	482	5221	28	80927	GSBRNA2T00083129001,GSBRNA2T00052894001,GSBRNA2T00130550001,GSBRNA2T00088021001,GSBRNA2T00009862001,GSBRNA2T00074877001,GSBRNA2T00118837001,GSBRNA2T00035751001,GSBRNA2T00061996001,GSBRNA2T00051670001,GSBRNA2T00000056001,GSBRNA2T00037261001,GSBRNA2T00043214001,GSBRNA2T00093204001,GSBRNA2T00056539001,GSBRNA2T00031244001,GSBRNA2T00151978001,GSBRNA2T00151979001,GSBRNA2T00112376001,GSBRNA2T00071535001…
GO:BP	cellular macromolecule localization	GO:0070727	1	3.65213e-08	668	5221	38	80927	GSBRNA2T00134123001,GSBRNA2T00126293001,GSBRNA2T00130924001,GSBRNA2T00009905001,GSBRNA2T00074538001,GSBRNA2T00035725001,GSBRNA2T00035726001,GSBRNA2T00065351001,GSBRNA2T00061975001,GSBRNA2T00050074001,GSBRNA2T00137467001,GSBRNA2T00006493001,GSBRNA2T00012890001,GSBRNA2T00151695001,GSBRNA2T00153695001,GSBRNA2T00018574001,GSBRNA2T00018529001,GSBRNA2T00078632001,GSBRNA2T00032831001,GSBRNA2T00115267001…
GO:BP	protein transmembrane transport	GO:0071806	1	3.65213e-08	55	5221	3	80927	GSBRNA2T00032831001,GSBRNA2T00054368001,GSBRNA2T00109501001
GO:BP	protein modification by small protein conjugation or removal	GO:0070647	1	3.65213e-08	567	5221	32	80927	GSBRNA2T00085673001,GSBRNA2T00085669001,GSBRNA2T00047296001,GSBRNA2T00065961001,GSBRNA2T00009905001,GSBRNA2T00009874001,GSBRNA2T00136001001,GSBRNA2T00132172001,GSBRNA2T00132171001,GSBRNA2T00069044001,GSBRNA2T00142050001,GSBRNA2T00078332001,GSBRNA2T00046016001,GSBRNA2T00134859001,GSBRNA2T00136564001,GSBRNA2T00108780001,GSBRNA2T00088793001,GSBRNA2T00088543001,GSBRNA2T00078613001,GSBRNA2T00032793001…
GO:BP	protein modification by small protein removal	GO:0070646	1	3.65213e-08	131	5221	5	80927	GSBRNA2T00009905001,GSBRNA2T00069044001,GSBRNA2T00046016001,GSBRNA2T00078613001,GSBRNA2T00096259001
GO:BP	protein localization to mitochondrion	GO:0070585	1	3.65213e-08	72	5221	4	80927	GSBRNA2T00050074001,GSBRNA2T00032831001,GSBRNA2T00115267001,GSBRNA2T00054368001
GO:BP	ribonucleoprotein complex subunit organization	GO:0071826	1	3.65213e-08	130	5221	6	80927	GSBRNA2T00110169001,GSBRNA2T00121890001,GSBRNA2T00057321001,GSBRNA2T00125208001,GSBRNA2T00155713001,GSBRNA2T00018491001
GO:BP	DNA biosynthetic process	GO:0071897	1	3.65213e-08	40	5221	2	80927	GSBRNA2T00030790001,GSBRNA2T00063471001
GO:BP	regulation of molecular function	GO:0065009	1	3.65213e-08	494	5221	27	80927	GSBRNA2T00068605001,GSBRNA2T00080814001,GSBRNA2T00016053001,GSBRNA2T00126733001,GSBRNA2T00053984001,GSBRNA2T00065403001,GSBRNA2T00078816001,GSBRNA2T00068962001,GSBRNA2T00070636001,GSBRNA2T00054753001,GSBRNA2T00054754001,GSBRNA2T00054755001,GSBRNA2T00054750001,GSBRNA2T00000087001,GSBRNA2T00095623001,GSBRNA2T00000972001,GSBRNA2T00069515001,GSBRNA2T00000518001,GSBRNA2T00027321001,GSBRNA2T00038555001…
GO:BP	protein-containing complex assembly	GO:0065003	1	3.65213e-08	484	5221	25	80927	GSBRNA2T00111677001,GSBRNA2T00149613001,GSBRNA2T00110169001,GSBRNA2T00130293001,GSBRNA2T00034777001,GSBRNA2T00121890001,GSBRNA2T00133018001,GSBRNA2T00095288001,GSBRNA2T00094842001,GSBRNA2T00117730001,GSBRNA2T00030928001,GSBRNA2T00134966001,GSBRNA2T00134833001,GSBRNA2T00157536001,GSBRNA2T00152712001,GSBRNA2T00078606001,GSBRNA2T00057321001,GSBRNA2T00034922001,GSBRNA2T00109402001,GSBRNA2T00064742001…
GO:BP	intracellular protein transmembrane transport	GO:0065002	1	3.65213e-08	37	5221	2	80927	GSBRNA2T00032831001,GSBRNA2T00054368001
GO:BP	cellular response to chemical stress	GO:0062197	1	3.65213e-08	31	5221	1	80927	GSBRNA2T00035751001
GO:BP	establishment of organelle localization	GO:0051656	1	3.65213e-08	32	5221	1	80927	GSBRNA2T00018529001
GO:BP	establishment of localization in cell	GO:0051649	1	3.65213e-08	811	5221	39	80927	GSBRNA2T00134123001,GSBRNA2T00126293001,GSBRNA2T00130924001,GSBRNA2T00009905001,GSBRNA2T00074538001,GSBRNA2T00035725001,GSBRNA2T00035726001,GSBRNA2T00065351001,GSBRNA2T00050074001,GSBRNA2T00137467001,GSBRNA2T00006493001,GSBRNA2T00012890001,GSBRNA2T00085405001,GSBRNA2T00001851001,GSBRNA2T00151695001,GSBRNA2T00153695001,GSBRNA2T00018574001,GSBRNA2T00018529001,GSBRNA2T00078632001,GSBRNA2T00078620001…
GO:BP	cellular localization	GO:0051641	1	3.65213e-08	881	5221	44	80927	GSBRNA2T00134123001,GSBRNA2T00126293001,GSBRNA2T00130924001,GSBRNA2T00009905001,GSBRNA2T00074538001,GSBRNA2T00035725001,GSBRNA2T00035726001,GSBRNA2T00065351001,GSBRNA2T00061975001,GSBRNA2T00050074001,GSBRNA2T00137467001,GSBRNA2T00006493001,GSBRNA2T00012890001,GSBRNA2T00085405001,GSBRNA2T00001851001,GSBRNA2T00151695001,GSBRNA2T00151527001,GSBRNA2T00153695001,GSBRNA2T00018574001,GSBRNA2T00018529001…
GO:BP	organelle localization	GO:0051640	1	3.65213e-08	65	5221	2	80927	GSBRNA2T00151527001,GSBRNA2T00018529001
GO:BP	protein insertion into mitochondrial membrane	GO:0051204	1	3.65213e-08	45	5221	2	80927	GSBRNA2T00050074001,GSBRNA2T00115267001
GO:BP	regulation of phosphorus metabolic process	GO:0051174	1	3.65213e-08	146	5221	3	80927	GSBRNA2T00126733001,GSBRNA2T00151747001,GSBRNA2T00124550001
GO:BP	negative regulation of nitrogen compound metabolic process	GO:0051172	1	3.65213e-08	238	5221	10	80927	GSBRNA2T00032489001,GSBRNA2T00064188001,GSBRNA2T00018234001,GSBRNA2T00000087001,GSBRNA2T00078683001,GSBRNA2T00074126001,GSBRNA2T00151926001,GSBRNA2T00080939001,GSBRNA2T00018458001,GSBRNA2T00125642001
GO:BP	regulation of nitrogen compound metabolic process	GO:0051171	1	3.65213e-08	3655	5221	195	80927	GSBRNA2T00134310001,GSBRNA2T00083129001,GSBRNA2T00026805001,GSBRNA2T00026833001,GSBRNA2T00042253001,GSBRNA2T00071333001,GSBRNA2T00044326001,GSBRNA2T00044371001,GSBRNA2T00085609001,GSBRNA2T00149561001,GSBRNA2T00149587001,GSBRNA2T00073188001,GSBRNA2T00130550001,GSBRNA2T00130641001,GSBRNA2T00101575001,GSBRNA2T00129941001,GSBRNA2T00009905001,GSBRNA2T00080795001,GSBRNA2T00080768001,GSBRNA2T00080799001…
GO:BP	glucosamine-containing compound catabolic process	GO:1901072	1	3.65213e-08	50	5221	2	80927	GSBRNA2T00139051001,GSBRNA2T00018360001
GO:BP	nuclear export	GO:0051168	1	3.65213e-08	36	5221	2	80927	GSBRNA2T00009905001,GSBRNA2T00018529001
GO:BP	carbohydrate derivative catabolic process	GO:1901136	1	3.65213e-08	82	5221	3	80927	GSBRNA2T00139051001,GSBRNA2T00002582001,GSBRNA2T00018360001
GO:BP	nucleoside phosphate biosynthetic process	GO:1901293	1	3.65213e-08	343	5221	18	80927	GSBRNA2T00051772001,GSBRNA2T00009885001,GSBRNA2T00080785001,GSBRNA2T00080784001,GSBRNA2T00156878001,GSBRNA2T00031131001,GSBRNA2T00105714001,GSBRNA2T00085766001,GSBRNA2T00069045001,GSBRNA2T00074672001,GSBRNA2T00000119001,GSBRNA2T00151907001,GSBRNA2T00119832001,GSBRNA2T00128475001,GSBRNA2T00145935001,GSBRNA2T00115611001,GSBRNA2T00122385001,GSBRNA2T00109670001
GO:BP	organic cyclic compound metabolic process	GO:1901360	1	3.65213e-08	6806	5221	386	80927	GSBRNA2T00134310001,GSBRNA2T00134408001,GSBRNA2T00134537001,GSBRNA2T00083129001,GSBRNA2T00039090001,GSBRNA2T00111781001,GSBRNA2T00005823001,GSBRNA2T00026805001,GSBRNA2T00026833001,GSBRNA2T00042253001,GSBRNA2T00051772001,GSBRNA2T00063980001,GSBRNA2T00071333001,GSBRNA2T00044326001,GSBRNA2T00044371001,GSBRNA2T00123113001,GSBRNA2T00120631001,GSBRNA2T00149561001,GSBRNA2T00149479001,GSBRNA2T00149587001…
GO:BP	organic cyclic compound biosynthetic process	GO:1901362	1	3.65213e-08	4576	5221	263	80927	GSBRNA2T00134310001,GSBRNA2T00134408001,GSBRNA2T00083129001,GSBRNA2T00026805001,GSBRNA2T00026833001,GSBRNA2T00042253001,GSBRNA2T00051772001,GSBRNA2T00063980001,GSBRNA2T00071333001,GSBRNA2T00044326001,GSBRNA2T00044371001,GSBRNA2T00149561001,GSBRNA2T00149587001,GSBRNA2T00073188001,GSBRNA2T00130550001,GSBRNA2T00130641001,GSBRNA2T00101575001,GSBRNA2T00129941001,GSBRNA2T00009885001,GSBRNA2T00009860001…
GO:BP	organonitrogen compound metabolic process	GO:1901564	1	3.65213e-08	9724	5221	570	80927	GSBRNA2T00134579001,GSBRNA2T00134408001,GSBRNA2T00081601001,GSBRNA2T00126361001,GSBRNA2T00094614001,GSBRNA2T00044826001,GSBRNA2T00111722001,GSBRNA2T00111499001,GSBRNA2T00111655001,GSBRNA2T00111638001,GSBRNA2T00005823001,GSBRNA2T00092278001,GSBRNA2T00051772001,GSBRNA2T00052918001,GSBRNA2T00054047001,GSBRNA2T00091739001,GSBRNA2T00123011001,GSBRNA2T00123113001,GSBRNA2T00120848001,GSBRNA2T00085673001…
GO:BP	regulation of cellular component organization	GO:0051128	1	3.65213e-08	135	5221	6	80927	GSBRNA2T00126733001,GSBRNA2T00094842001,GSBRNA2T00139380001,GSBRNA2T00078606001,GSBRNA2T00151747001,GSBRNA2T00151742001
GO:BP	negative regulation of developmental process	GO:0051093	1	3.65213e-08	24	5221	1	80927	GSBRNA2T00074697001
GO:BP	organonitrogen compound catabolic process	GO:1901565	1	3.65213e-08	616	5221	33	80927	GSBRNA2T00004540001,GSBRNA2T00037127001,GSBRNA2T00005644001,GSBRNA2T00078816001,GSBRNA2T00132364001,GSBRNA2T00012561001,GSBRNA2T00117809001,GSBRNA2T00069044001,GSBRNA2T00021856001,GSBRNA2T00141888001,GSBRNA2T00105341001,GSBRNA2T00105377001,GSBRNA2T00116823001,GSBRNA2T00095535001,GSBRNA2T00112786001,GSBRNA2T00112701001,GSBRNA2T00134993001,GSBRNA2T00141267001,GSBRNA2T00088793001,GSBRNA2T00078613001…
GO:BP	regulation of transport	GO:0051049	1	3.65213e-08	44	5221	1	80927	GSBRNA2T00133567001
GO:BP	defense response to fungus	GO:0050832	1	3.65213e-08	54	5221	3	80927	GSBRNA2T00110278001,GSBRNA2T00151943001,GSBRNA2T00114665001
GO:BP	regulation of developmental process	GO:0050793	1	3.65213e-08	124	5221	7	80927	GSBRNA2T00114181001,GSBRNA2T00052025001,GSBRNA2T00074697001,GSBRNA2T00032758001,GSBRNA2T00151742001,GSBRNA2T00146015001,GSBRNA2T00146011001
GO:BP	regulation of catalytic activity	GO:0050790	1	3.65213e-08	483	5221	27	80927	GSBRNA2T00068605001,GSBRNA2T00080814001,GSBRNA2T00016053001,GSBRNA2T00126733001,GSBRNA2T00053984001,GSBRNA2T00065403001,GSBRNA2T00078816001,GSBRNA2T00068962001,GSBRNA2T00070636001,GSBRNA2T00054753001,GSBRNA2T00054754001,GSBRNA2T00054755001,GSBRNA2T00054750001,GSBRNA2T00000087001,GSBRNA2T00095623001,GSBRNA2T00000972001,GSBRNA2T00069515001,GSBRNA2T00000518001,GSBRNA2T00027321001,GSBRNA2T00038555001…
GO:BP	response to nitrogen compound	GO:1901698	1	3.65213e-08	33	5221	1	80927	GSBRNA2T00074877001
GO:BP	cellular developmental process	GO:0048869	1	3.65213e-08	61	5221	2	80927	GSBRNA2T00114181001,GSBRNA2T00086964001
GO:BP	anatomical structure development	GO:0048856	1	3.65213e-08	420	5221	23	80927	GSBRNA2T00130502001,GSBRNA2T00101575001,GSBRNA2T00037127001,GSBRNA2T00114181001,GSBRNA2T00064199001,GSBRNA2T00137449001,GSBRNA2T00052025001,GSBRNA2T00074697001,GSBRNA2T00124025001,GSBRNA2T00033324001,GSBRNA2T00112786001,GSBRNA2T00107612001,GSBRNA2T00032758001,GSBRNA2T00138963001,GSBRNA2T00151742001,GSBRNA2T00151882001,GSBRNA2T00151734001,GSBRNA2T00128202001,GSBRNA2T00024664001,GSBRNA2T00146015001…
GO:BP	cellular response to oxygen-containing compound	GO:1901701	1	3.65213e-08	113	5221	6	80927	GSBRNA2T00083129001,GSBRNA2T00074877001,GSBRNA2T00035751001,GSBRNA2T00037261001,GSBRNA2T00071535001,GSBRNA2T00115838001
GO:BP	regulation of developmental growth	GO:0048638	1	3.65213e-08	41	5221	1	80927	GSBRNA2T00151742001
GO:BP	protein insertion into membrane	GO:0051205	1	3.65213e-08	48	5221	2	80927	GSBRNA2T00050074001,GSBRNA2T00115267001
GO:BP	negative regulation of RNA biosynthetic process	GO:1902679	1	3.65213e-08	143	5221	8	80927	GSBRNA2T00032489001,GSBRNA2T00064188001,GSBRNA2T00018234001,GSBRNA2T00078683001,GSBRNA2T00151926001,GSBRNA2T00080939001,GSBRNA2T00018458001,GSBRNA2T00125642001
GO:BP	glucosamine-containing compound metabolic process	GO:1901071	1	3.65213e-08	50	5221	2	80927	GSBRNA2T00139051001,GSBRNA2T00018360001
GO:BP	exocytic process	GO:0140029	1	3.65213e-08	31	5221	1	80927	GSBRNA2T00151527001
GO:BP	protein maturation	GO:0051604	1	3.65213e-08	126	5221	6	80927	GSBRNA2T00104946001,GSBRNA2T00073265001,GSBRNA2T00044658001,GSBRNA2T00078721001,GSBRNA2T00091223001,GSBRNA2T00065634001
GO:BP	proteolysis involved in cellular protein catabolic process	GO:0051603	1	3.65213e-08	354	5221	20	80927	GSBRNA2T00004540001,GSBRNA2T00037127001,GSBRNA2T00005644001,GSBRNA2T00117809001,GSBRNA2T00069044001,GSBRNA2T00105377001,GSBRNA2T00095535001,GSBRNA2T00112786001,GSBRNA2T00134993001,GSBRNA2T00088793001,GSBRNA2T00078613001,GSBRNA2T00151756001,GSBRNA2T00151755001,GSBRNA2T00116544001,GSBRNA2T00052464001,GSBRNA2T00098540001,GSBRNA2T00096259001,GSBRNA2T00149162001,GSBRNA2T00155576001,GSBRNA2T00018441001
GO:BP	nucleic acid-templated transcription	GO:0097659	1	3.65213e-08	3698	5221	205	80927	GSBRNA2T00134310001,GSBRNA2T00083129001,GSBRNA2T00026805001,GSBRNA2T00026833001,GSBRNA2T00042253001,GSBRNA2T00063980001,GSBRNA2T00071333001,GSBRNA2T00044326001,GSBRNA2T00044371001,GSBRNA2T00149561001,GSBRNA2T00149587001,GSBRNA2T00073188001,GSBRNA2T00130550001,GSBRNA2T00130641001,GSBRNA2T00101575001,GSBRNA2T00129941001,GSBRNA2T00009860001,GSBRNA2T00009905001,GSBRNA2T00080795001,GSBRNA2T00080768001…
GO:BP	defense response to other organism	GO:0098542	1	3.65213e-08	136	5221	5	80927	GSBRNA2T00110278001,GSBRNA2T00037261001,GSBRNA2T00151943001,GSBRNA2T00114665001,GSBRNA2T00109484001
GO:BP	positive regulation of cytoskeleton organization	GO:0051495	1	3.65213e-08	40	5221	2	80927	GSBRNA2T00094842001,GSBRNA2T00078606001
GO:BP	anion transmembrane transport	GO:0098656	1	3.65213e-08	91	5221	5	80927	GSBRNA2T00081088001,GSBRNA2T00134839001,GSBRNA2T00015696001,GSBRNA2T00133567001,GSBRNA2T00018454001
GO:BP	positive regulation of transferase activity	GO:0051347	1	3.65213e-08	50	5221	2	80927	GSBRNA2T00126733001,GSBRNA2T00151747001
GO:BP	negative regulation of hydrolase activity	GO:0051346	1	3.65213e-08	66	5221	2	80927	GSBRNA2T00000087001,GSBRNA2T00074126001
GO:BP	regulation of transferase activity	GO:0051338	1	3.65213e-08	104	5221	2	80927	GSBRNA2T00126733001,GSBRNA2T00151747001
GO:BP	regulation of hydrolase activity	GO:0051336	1	3.65213e-08	171	5221	7	80927	GSBRNA2T00000087001,GSBRNA2T00000972001,GSBRNA2T00027321001,GSBRNA2T00074126001,GSBRNA2T00048973001,GSBRNA2T00124550001,GSBRNA2T00029473001
GO:BP	meiotic cell cycle	GO:0051321	1	3.65213e-08	55	5221	2	80927	GSBRNA2T00095233001,GSBRNA2T00109534001
GO:BP	nuclear chromosome segregation	GO:0098813	1	3.65213e-08	91	5221	5	80927	GSBRNA2T00136259001,GSBRNA2T00106946001,GSBRNA2T00071122001,GSBRNA2T00099180001,GSBRNA2T00154913001
GO:BP	protein polymerization	GO:0051258	1	3.65213e-08	47	5221	2	80927	GSBRNA2T00094842001,GSBRNA2T00078606001
GO:BP	intermembrane lipid transfer	GO:0120009	1	3.65213e-08	21	5221	1	80927	GSBRNA2T00095239001
GO:BP	negative regulation of RNA metabolic process	GO:0051253	1	3.65213e-08	149	5221	8	80927	GSBRNA2T00032489001,GSBRNA2T00064188001,GSBRNA2T00018234001,GSBRNA2T00078683001,GSBRNA2T00151926001,GSBRNA2T00080939001,GSBRNA2T00018458001,GSBRNA2T00125642001
GO:BP	regulation of RNA metabolic process	GO:0051252	1	3.65213e-08	3360	5221	186	80927	GSBRNA2T00134310001,GSBRNA2T00083129001,GSBRNA2T00026805001,GSBRNA2T00026833001,GSBRNA2T00042253001,GSBRNA2T00071333001,GSBRNA2T00044326001,GSBRNA2T00044371001,GSBRNA2T00149561001,GSBRNA2T00149587001,GSBRNA2T00073188001,GSBRNA2T00130550001,GSBRNA2T00130641001,GSBRNA2T00101575001,GSBRNA2T00129941001,GSBRNA2T00009905001,GSBRNA2T00080795001,GSBRNA2T00080768001,GSBRNA2T00080799001,GSBRNA2T00010277001…
GO:BP	negative regulation of protein metabolic process	GO:0051248	1	3.65213e-08	84	5221	2	80927	GSBRNA2T00000087001,GSBRNA2T00074126001
GO:BP	meiotic nuclear division	GO:0140013	1	3.65213e-08	39	5221	2	80927	GSBRNA2T00095233001,GSBRNA2T00109534001
GO:BP	positive regulation of protein metabolic process	GO:0051247	1	3.65213e-08	64	5221	3	80927	GSBRNA2T00126733001,GSBRNA2T00139380001,GSBRNA2T00151747001
GO:BP	regulation of protein metabolic process	GO:0051246	1	3.65213e-08	287	5221	9	80927	GSBRNA2T00085609001,GSBRNA2T00126733001,GSBRNA2T00078816001,GSBRNA2T00000087001,GSBRNA2T00139380001,GSBRNA2T00006418001,GSBRNA2T00074126001,GSBRNA2T00151747001,GSBRNA2T00124550001
GO:BP	negative regulation of multicellular organismal process	GO:0051241	1	3.65213e-08	24	5221	1	80927	GSBRNA2T00074697001
GO:BP	regulation of multicellular organismal process	GO:0051239	1	3.65213e-08	99	5221	4	80927	GSBRNA2T00052025001,GSBRNA2T00074697001,GSBRNA2T00146015001,GSBRNA2T00146011001
GO:BP	mitotic nuclear division	GO:0140014	1	3.65213e-08	67	5221	3	80927	GSBRNA2T00071122001,GSBRNA2T00099180001,GSBRNA2T00154913001
GO:BP	organelle localization by membrane tethering	GO:0140056	1	3.65213e-08	35	5221	1	80927	GSBRNA2T00151527001
GO:BP	regulation of cell division	GO:0051302	1	3.65213e-08	22	5221	1	80927	GSBRNA2T00088735001
GO:BP	ribonucleoprotein complex biogenesis	GO:0022613	1	3.65213e-08	378	5221	17	80927	GSBRNA2T00039090001,GSBRNA2T00110169001,GSBRNA2T00122137001,GSBRNA2T00121890001,GSBRNA2T00154544001,GSBRNA2T00036881001,GSBRNA2T00134969001,GSBRNA2T00018529001,GSBRNA2T00057321001,GSBRNA2T00151900001,GSBRNA2T00114774001,GSBRNA2T00125208001,GSBRNA2T00155713001,GSBRNA2T00115875001,GSBRNA2T00018491001,GSBRNA2T00018423001,GSBRNA2T00109562001
GO:BP	nucleotide phosphorylation	GO:0046939	1	3.65213e-08	165	5221	8	80927	GSBRNA2T00093561001,GSBRNA2T00146469001,GSBRNA2T00134657001,GSBRNA2T00134656001,GSBRNA2T00007196001,GSBRNA2T00150980001,GSBRNA2T00068677001,GSBRNA2T00141638001
GO:BP	meiosis II	GO:0007135	1	3.65213e-08	18	5221	1	80927	GSBRNA2T00095233001
GO:BP	multicellular organism development	GO:0007275	1	3.65213e-08	343	5221	20	80927	GSBRNA2T00130502001,GSBRNA2T00101575001,GSBRNA2T00037127001,GSBRNA2T00114181001,GSBRNA2T00064199001,GSBRNA2T00137449001,GSBRNA2T00052025001,GSBRNA2T00074697001,GSBRNA2T00124025001,GSBRNA2T00033324001,GSBRNA2T00112786001,GSBRNA2T00107612001,GSBRNA2T00138963001,GSBRNA2T00151882001,GSBRNA2T00128202001,GSBRNA2T00024664001,GSBRNA2T00146015001,GSBRNA2T00146011001,GSBRNA2T00070205001,GSBRNA2T00018486001
GO:BP	regulation of mitotic cell cycle	GO:0007346	1	3.65213e-08	48	5221	2	80927	GSBRNA2T00126733001,GSBRNA2T00151747001
GO:BP	circadian rhythm	GO:0007623	1	3.65213e-08	47	5221	1	80927	GSBRNA2T00134680001
GO:BP	tRNA processing	GO:0008033	1	3.65213e-08	181	5221	7	80927	GSBRNA2T00117949001,GSBRNA2T00135162001,GSBRNA2T00037304001,GSBRNA2T00134865001,GSBRNA2T00081050001,GSBRNA2T00124368001,GSBRNA2T00063268001
GO:BP	protein alkylation	GO:0008213	1	3.65213e-08	103	5221	4	80927	GSBRNA2T00095217001,GSBRNA2T00099774001,GSBRNA2T00009277001,GSBRNA2T00100894001
GO:BP	cell death	GO:0008219	1	3.65213e-08	18	5221	1	80927	GSBRNA2T00067723001
GO:BP	asymmetric cell division	GO:0008356	1	3.65213e-08	25	5221	1	80927	GSBRNA2T00088735001
GO:BP	chromosome segregation	GO:0007059	1	3.65213e-08	100	5221	5	80927	GSBRNA2T00136259001,GSBRNA2T00106946001,GSBRNA2T00071122001,GSBRNA2T00099180001,GSBRNA2T00154913001
GO:BP	RNA splicing	GO:0008380	1	3.65213e-08	281	5221	16	80927	GSBRNA2T00134537001,GSBRNA2T00110169001,GSBRNA2T00129689001,GSBRNA2T00136368001,GSBRNA2T00089488001,GSBRNA2T00155274001,GSBRNA2T00009425001,GSBRNA2T00106116001,GSBRNA2T00151610001,GSBRNA2T00135019001,GSBRNA2T00091296001,GSBRNA2T00009080001,GSBRNA2T00125208001,GSBRNA2T00018491001,GSBRNA2T00109527001,GSBRNA2T00109440001
GO:BP	nucleobase metabolic process	GO:0009112	1	3.65213e-08	57	5221	3	80927	GSBRNA2T00072696001,GSBRNA2T00145935001,GSBRNA2T00143476001
GO:BP	purine nucleobase biosynthetic process	GO:0009113	1	3.65213e-08	24	5221	1	80927	GSBRNA2T00143476001
GO:BP	nucleotide metabolic process	GO:0009117	1	3.65213e-08	562	5221	27	80927	GSBRNA2T00051772001,GSBRNA2T00009885001,GSBRNA2T00080785001,GSBRNA2T00080784001,GSBRNA2T00156878001,GSBRNA2T00093561001,GSBRNA2T00031131001,GSBRNA2T00105714001,GSBRNA2T00085766001,GSBRNA2T00069045001,GSBRNA2T00028864001,GSBRNA2T00074672001,GSBRNA2T00000119001,GSBRNA2T00146469001,GSBRNA2T00134657001,GSBRNA2T00134656001,GSBRNA2T00007196001,GSBRNA2T00150980001,GSBRNA2T00151907001,GSBRNA2T00119832001…
GO:BP	nucleoside monophosphate metabolic process	GO:0009123	1	3.65213e-08	88	5221	3	80927	GSBRNA2T00051772001,GSBRNA2T00009885001,GSBRNA2T00074672001
GO:BP	nucleoside monophosphate biosynthetic process	GO:0009124	1	3.65213e-08	72	5221	3	80927	GSBRNA2T00051772001,GSBRNA2T00009885001,GSBRNA2T00074672001
GO:BP	nucleoside diphosphate metabolic process	GO:0009132	1	3.65213e-08	178	5221	8	80927	GSBRNA2T00093561001,GSBRNA2T00146469001,GSBRNA2T00134657001,GSBRNA2T00134656001,GSBRNA2T00007196001,GSBRNA2T00150980001,GSBRNA2T00068677001,GSBRNA2T00141638001
GO:BP	purine nucleoside diphosphate metabolic process	GO:0009135	1	3.65213e-08	152	5221	8	80927	GSBRNA2T00093561001,GSBRNA2T00146469001,GSBRNA2T00134657001,GSBRNA2T00134656001,GSBRNA2T00007196001,GSBRNA2T00150980001,GSBRNA2T00068677001,GSBRNA2T00141638001
GO:BP	purine ribonucleotide metabolic process	GO:0009150	1	3.65213e-08	393	5221	16	80927	GSBRNA2T00080785001,GSBRNA2T00080784001,GSBRNA2T00093561001,GSBRNA2T00085766001,GSBRNA2T00028864001,GSBRNA2T00000119001,GSBRNA2T00146469001,GSBRNA2T00134657001,GSBRNA2T00134656001,GSBRNA2T00007196001,GSBRNA2T00150980001,GSBRNA2T00151907001,GSBRNA2T00119832001,GSBRNA2T00115611001,GSBRNA2T00068677001,GSBRNA2T00141638001
GO:BP	vitamin biosynthetic process	GO:0009110	1	3.65213e-08	53	5221	1	80927	GSBRNA2T00155426001
GO:BP	purine ribonucleotide biosynthetic process	GO:0009152	1	3.65213e-08	181	5221	7	80927	GSBRNA2T00080785001,GSBRNA2T00080784001,GSBRNA2T00085766001,GSBRNA2T00000119001,GSBRNA2T00151907001,GSBRNA2T00119832001,GSBRNA2T00115611001
GO:BP	spindle organization	GO:0007051	1	3.65213e-08	48	5221	2	80927	GSBRNA2T00126733001,GSBRNA2T00151747001
GO:BP	vacuolar transport	GO:0007034	1	3.65213e-08	67	5221	1	80927	GSBRNA2T00055200001
GO:BP	nitrogen compound metabolic process	GO:0006807	1	3.65213e-08	15002	5221	864	80927	GSBRNA2T00134310001,GSBRNA2T00134579001,GSBRNA2T00134408001,GSBRNA2T00134537001,GSBRNA2T00081601001,GSBRNA2T00083129001,GSBRNA2T00126361001,GSBRNA2T00039090001,GSBRNA2T00094614001,GSBRNA2T00044826001,GSBRNA2T00111781001,GSBRNA2T00111722001,GSBRNA2T00111499001,GSBRNA2T00111655001,GSBRNA2T00111638001,GSBRNA2T00005823001,GSBRNA2T00026805001,GSBRNA2T00026833001,GSBRNA2T00042253001,GSBRNA2T00092278001…
GO:BP	calcium ion transport	GO:0006816	1	3.65213e-08	57	5221	3	80927	GSBRNA2T00127402001,GSBRNA2T00093028001,GSBRNA2T00065618001
GO:BP	anion transport	GO:0006820	1	3.65213e-08	292	5221	17	80927	GSBRNA2T00126427001,GSBRNA2T00105361001,GSBRNA2T00100969001,GSBRNA2T00001912001,GSBRNA2T00033287001,GSBRNA2T00156837001,GSBRNA2T00081088001,GSBRNA2T00134839001,GSBRNA2T00091610001,GSBRNA2T00104676001,GSBRNA2T00104678001,GSBRNA2T00071129001,GSBRNA2T00115966001,GSBRNA2T00108138001,GSBRNA2T00015696001,GSBRNA2T00133567001,GSBRNA2T00018454001
GO:BP	chloride transport	GO:0006821	1	3.65213e-08	25	5221	1	80927	GSBRNA2T00108138001
GO:BP	zinc ion transport	GO:0006829	1	3.65213e-08	31	5221	1	80927	GSBRNA2T00113869001
GO:BP	mitochondrial transport	GO:0006839	1	3.65213e-08	91	5221	4	80927	GSBRNA2T00050074001,GSBRNA2T00032831001,GSBRNA2T00115267001,GSBRNA2T00054368001
GO:BP	intracellular protein transport	GO:0006886	1	3.65213e-08	630	5221	34	80927	GSBRNA2T00134123001,GSBRNA2T00126293001,GSBRNA2T00130924001,GSBRNA2T00009905001,GSBRNA2T00074538001,GSBRNA2T00035725001,GSBRNA2T00035726001,GSBRNA2T00065351001,GSBRNA2T00050074001,GSBRNA2T00137467001,GSBRNA2T00006493001,GSBRNA2T00012890001,GSBRNA2T00151695001,GSBRNA2T00153695001,GSBRNA2T00018574001,GSBRNA2T00018529001,GSBRNA2T00078632001,GSBRNA2T00032831001,GSBRNA2T00115267001,GSBRNA2T00150208001…
GO:BP	endoplasmic reticulum to Golgi vesicle-mediated transport	GO:0006888	1	3.65213e-08	73	5221	2	80927	GSBRNA2T00006493001,GSBRNA2T00018365001
GO:BP	cell cycle	GO:0007049	1	3.65213e-08	371	5221	21	80927	GSBRNA2T00136259001,GSBRNA2T00126733001,GSBRNA2T00095233001,GSBRNA2T00106946001,GSBRNA2T00069045001,GSBRNA2T00116951001,GSBRNA2T00155346001,GSBRNA2T00073904001,GSBRNA2T00152670001,GSBRNA2T00078704001,GSBRNA2T00038614001,GSBRNA2T00151747001,GSBRNA2T00071122001,GSBRNA2T00094368001,GSBRNA2T00154032001,GSBRNA2T00099180001,GSBRNA2T00080030001,GSBRNA2T00018504001,GSBRNA2T00154913001,GSBRNA2T00109534001…
GO:BP	vesicle docking involved in exocytosis	GO:0006904	1	3.65213e-08	31	5221	1	80927	GSBRNA2T00151527001
GO:BP	defense response	GO:0006952	1	3.65213e-08	350	5221	19	80927	GSBRNA2T00068585001,GSBRNA2T00009806001,GSBRNA2T00002269001,GSBRNA2T00110278001,GSBRNA2T00005536001,GSBRNA2T00116685001,GSBRNA2T00116684001,GSBRNA2T00037261001,GSBRNA2T00101356001,GSBRNA2T00151943001,GSBRNA2T00152013001,GSBRNA2T00071535001,GSBRNA2T00114665001,GSBRNA2T00021980001,GSBRNA2T00041667001,GSBRNA2T00018447001,GSBRNA2T00018444001,GSBRNA2T00145286001,GSBRNA2T00109484001
GO:BP	immune response	GO:0006955	1	3.65213e-08	77	5221	1	80927	GSBRNA2T00037261001
GO:BP	nucleus organization	GO:0006997	1	3.65213e-08	20	5221	1	80927	GSBRNA2T00135239001
GO:BP	mitochondrial membrane organization	GO:0007006	1	3.65213e-08	45	5221	2	80927	GSBRNA2T00050074001,GSBRNA2T00115267001
GO:BP	inner mitochondrial membrane organization	GO:0007007	1	3.65213e-08	36	5221	1	80927	GSBRNA2T00115267001
GO:BP	microtubule-based process	GO:0007017	1	3.65213e-08	381	5221	21	80927	GSBRNA2T00074535001,GSBRNA2T00074534001,GSBRNA2T00126733001,GSBRNA2T00094842001,GSBRNA2T00038392001,GSBRNA2T00028840001,GSBRNA2T00146672001,GSBRNA2T00135009001,GSBRNA2T00102670001,GSBRNA2T00138404001,GSBRNA2T00147458001,GSBRNA2T00078606001,GSBRNA2T00032751001,GSBRNA2T00142224001,GSBRNA2T00151747001,GSBRNA2T00151740001,GSBRNA2T00018894001,GSBRNA2T00075098001,GSBRNA2T00103465001,GSBRNA2T00073939001…
GO:BP	microtubule-based movement	GO:0007018	1	3.65213e-08	176	5221	9	80927	GSBRNA2T00135009001,GSBRNA2T00102670001,GSBRNA2T00138404001,GSBRNA2T00032751001,GSBRNA2T00018894001,GSBRNA2T00075098001,GSBRNA2T00103465001,GSBRNA2T00073939001,GSBRNA2T00109447001
GO:BP	peroxisome organization	GO:0007031	1	3.65213e-08	41	5221	2	80927	GSBRNA2T00074919001,GSBRNA2T00149229001
GO:BP	movement of cell or subcellular component	GO:0006928	1	3.65213e-08	176	5221	9	80927	GSBRNA2T00135009001,GSBRNA2T00102670001,GSBRNA2T00138404001,GSBRNA2T00032751001,GSBRNA2T00018894001,GSBRNA2T00075098001,GSBRNA2T00103465001,GSBRNA2T00073939001,GSBRNA2T00109447001
GO:BP	superoxide metabolic process	GO:0006801	1	3.65213e-08	45	5221	2	80927	GSBRNA2T00035751001,GSBRNA2T00146102001
GO:BP	ribonucleoside monophosphate biosynthetic process	GO:0009156	1	3.65213e-08	59	5221	3	80927	GSBRNA2T00051772001,GSBRNA2T00009885001,GSBRNA2T00074672001
GO:BP	nucleotide biosynthetic process	GO:0009165	1	3.65213e-08	340	5221	18	80927	GSBRNA2T00051772001,GSBRNA2T00009885001,GSBRNA2T00080785001,GSBRNA2T00080784001,GSBRNA2T00156878001,GSBRNA2T00031131001,GSBRNA2T00105714001,GSBRNA2T00085766001,GSBRNA2T00069045001,GSBRNA2T00074672001,GSBRNA2T00000119001,GSBRNA2T00151907001,GSBRNA2T00119832001,GSBRNA2T00128475001,GSBRNA2T00145935001,GSBRNA2T00115611001,GSBRNA2T00122385001,GSBRNA2T00109670001
GO:BP	tissue development	GO:0009888	1	3.65213e-08	77	5221	1	80927	GSBRNA2T00064199001
GO:BP	regulation of biosynthetic process	GO:0009889	1	3.65213e-08	3451	5221	195	80927	GSBRNA2T00134310001,GSBRNA2T00081585001,GSBRNA2T00083129001,GSBRNA2T00026805001,GSBRNA2T00026833001,GSBRNA2T00042253001,GSBRNA2T00071333001,GSBRNA2T00044326001,GSBRNA2T00044371001,GSBRNA2T00085609001,GSBRNA2T00149561001,GSBRNA2T00149587001,GSBRNA2T00073188001,GSBRNA2T00130550001,GSBRNA2T00130641001,GSBRNA2T00101575001,GSBRNA2T00129941001,GSBRNA2T00009905001,GSBRNA2T00080795001,GSBRNA2T00080768001…
GO:BP	negative regulation of biosynthetic process	GO:0009890	1	3.65213e-08	156	5221	8	80927	GSBRNA2T00032489001,GSBRNA2T00064188001,GSBRNA2T00018234001,GSBRNA2T00078683001,GSBRNA2T00151926001,GSBRNA2T00080939001,GSBRNA2T00018458001,GSBRNA2T00125642001
GO:BP	negative regulation of metabolic process	GO:0009892	1	3.65213e-08	375	5221	14	80927	GSBRNA2T00032489001,GSBRNA2T00064188001,GSBRNA2T00078343001,GSBRNA2T00018234001,GSBRNA2T00062085001,GSBRNA2T00000087001,GSBRNA2T00078683001,GSBRNA2T00078576001,GSBRNA2T00074126001,GSBRNA2T00151926001,GSBRNA2T00080939001,GSBRNA2T00018458001,GSBRNA2T00125642001,GSBRNA2T00109440001
GO:BP	regulation of catabolic process	GO:0009894	1	3.65213e-08	37	5221	2	80927	GSBRNA2T00078816001,GSBRNA2T00111131001
GO:BP	response to organic substance	GO:0010033	1	3.65213e-08	554	5221	31	80927	GSBRNA2T00083129001,GSBRNA2T00130868001,GSBRNA2T00130867001,GSBRNA2T00130550001,GSBRNA2T00136467001,GSBRNA2T00114181001,GSBRNA2T00143729001,GSBRNA2T00154200001,GSBRNA2T00005544001,GSBRNA2T00037261001,GSBRNA2T00141156001,GSBRNA2T00147458001,GSBRNA2T00136702001,GSBRNA2T00086704001,GSBRNA2T00138837001,GSBRNA2T00140858001,GSBRNA2T00151978001,GSBRNA2T00151979001,GSBRNA2T00148208001,GSBRNA2T00112376001…
GO:BP	response to nitrate	GO:0010167	1	3.65213e-08	23	5221	1	80927	GSBRNA2T00074877001
GO:BP	endomembrane system organization	GO:0010256	1	3.65213e-08	24	5221	1	80927	GSBRNA2T00115918001
GO:BP	pollination	GO:0009856	1	3.65213e-08	93	5221	5	80927	GSBRNA2T00131588001,GSBRNA2T00060148001,GSBRNA2T00057109001,GSBRNA2T00102191001,GSBRNA2T00102188001
GO:BP	hydrotropism	GO:0010274	1	3.65213e-08	36	5221	2	80927	GSBRNA2T00107143001,GSBRNA2T00146110001
GO:BP	xyloglucan metabolic process	GO:0010411	1	3.65213e-08	77	5221	3	80927	GSBRNA2T00128202001,GSBRNA2T00112619001,GSBRNA2T00018497001
GO:BP	negative regulation of peptidase activity	GO:0010466	1	3.65213e-08	53	5221	2	80927	GSBRNA2T00000087001,GSBRNA2T00074126001
GO:BP	gene expression	GO:0010467	1	3.65213e-08	6469	5221	382	80927	GSBRNA2T00134310001,GSBRNA2T00134579001,GSBRNA2T00134537001,GSBRNA2T00083129001,GSBRNA2T00039090001,GSBRNA2T00094614001,GSBRNA2T00044826001,GSBRNA2T00111781001,GSBRNA2T00111722001,GSBRNA2T00005823001,GSBRNA2T00026805001,GSBRNA2T00026833001,GSBRNA2T00042253001,GSBRNA2T00063980001,GSBRNA2T00071333001,GSBRNA2T00044326001,GSBRNA2T00044371001,GSBRNA2T00123113001,GSBRNA2T00085609001,GSBRNA2T00104946001…
GO:BP	regulation of gene expression	GO:0010468	1	3.65213e-08	3634	5221	220	80927	GSBRNA2T00134310001,GSBRNA2T00083129001,GSBRNA2T00026805001,GSBRNA2T00026833001,GSBRNA2T00042253001,GSBRNA2T00071333001,GSBRNA2T00044326001,GSBRNA2T00044371001,GSBRNA2T00085609001,GSBRNA2T00149561001,GSBRNA2T00149587001,GSBRNA2T00073188001,GSBRNA2T00130550001,GSBRNA2T00130641001,GSBRNA2T00065864001,GSBRNA2T00101575001,GSBRNA2T00129941001,GSBRNA2T00009905001,GSBRNA2T00080795001,GSBRNA2T00080768001…
GO:BP	proteasomal protein catabolic process	GO:0010498	1	3.65213e-08	51	5221	1	80927	GSBRNA2T00088793001
GO:BP	regulation of macromolecule biosynthetic process	GO:0010556	1	3.65213e-08	3432	5221	193	80927	GSBRNA2T00134310001,GSBRNA2T00083129001,GSBRNA2T00026805001,GSBRNA2T00026833001,GSBRNA2T00042253001,GSBRNA2T00071333001,GSBRNA2T00044326001,GSBRNA2T00044371001,GSBRNA2T00085609001,GSBRNA2T00149561001,GSBRNA2T00149587001,GSBRNA2T00073188001,GSBRNA2T00130550001,GSBRNA2T00130641001,GSBRNA2T00101575001,GSBRNA2T00129941001,GSBRNA2T00009905001,GSBRNA2T00080795001,GSBRNA2T00080768001,GSBRNA2T00080799001…
GO:BP	negative regulation of macromolecule biosynthetic process	GO:0010558	1	3.65213e-08	148	5221	8	80927	GSBRNA2T00032489001,GSBRNA2T00064188001,GSBRNA2T00018234001,GSBRNA2T00078683001,GSBRNA2T00151926001,GSBRNA2T00080939001,GSBRNA2T00018458001,GSBRNA2T00125642001
GO:BP	negative regulation of macromolecule metabolic process	GO:0010605	1	3.65213e-08	362	5221	14	80927	GSBRNA2T00032489001,GSBRNA2T00064188001,GSBRNA2T00078343001,GSBRNA2T00018234001,GSBRNA2T00062085001,GSBRNA2T00000087001,GSBRNA2T00078683001,GSBRNA2T00078576001,GSBRNA2T00074126001,GSBRNA2T00151926001,GSBRNA2T00080939001,GSBRNA2T00018458001,GSBRNA2T00125642001,GSBRNA2T00109440001
GO:BP	stomatal complex development	GO:0010374	1	3.65213e-08	24	5221	1	80927	GSBRNA2T00064199001
GO:BP	ribonucleoside monophosphate metabolic process	GO:0009161	1	3.65213e-08	60	5221	3	80927	GSBRNA2T00051772001,GSBRNA2T00009885001,GSBRNA2T00074672001
GO:BP	hormone-mediated signaling pathway	GO:0009755	1	3.65213e-08	237	5221	10	80927	GSBRNA2T00083129001,GSBRNA2T00130550001,GSBRNA2T00037261001,GSBRNA2T00151978001,GSBRNA2T00151979001,GSBRNA2T00112376001,GSBRNA2T00037198001,GSBRNA2T00146165001,GSBRNA2T00121086001,GSBRNA2T00139470001
GO:BP	response to brassinosteroid	GO:0009741	1	3.65213e-08	34	5221	1	80927	GSBRNA2T00083129001
GO:BP	purine ribonucleoside diphosphate metabolic process	GO:0009179	1	3.65213e-08	152	5221	8	80927	GSBRNA2T00093561001,GSBRNA2T00146469001,GSBRNA2T00134657001,GSBRNA2T00134656001,GSBRNA2T00007196001,GSBRNA2T00150980001,GSBRNA2T00068677001,GSBRNA2T00141638001
GO:BP	ribonucleoside diphosphate metabolic process	GO:0009185	1	3.65213e-08	152	5221	8	80927	GSBRNA2T00093561001,GSBRNA2T00146469001,GSBRNA2T00134657001,GSBRNA2T00134656001,GSBRNA2T00007196001,GSBRNA2T00150980001,GSBRNA2T00068677001,GSBRNA2T00141638001
GO:BP	nucleotide-sugar biosynthetic process	GO:0009226	1	3.65213e-08	25	5221	1	80927	GSBRNA2T00151730001
GO:BP	ribonucleotide metabolic process	GO:0009259	1	3.65213e-08	428	5221	23	80927	GSBRNA2T00009885001,GSBRNA2T00080785001,GSBRNA2T00080784001,GSBRNA2T00156878001,GSBRNA2T00093561001,GSBRNA2T00031131001,GSBRNA2T00105714001,GSBRNA2T00085766001,GSBRNA2T00028864001,GSBRNA2T00074672001,GSBRNA2T00000119001,GSBRNA2T00146469001,GSBRNA2T00134657001,GSBRNA2T00134656001,GSBRNA2T00007196001,GSBRNA2T00150980001,GSBRNA2T00151907001,GSBRNA2T00119832001,GSBRNA2T00128475001,GSBRNA2T00115611001…
GO:BP	response to radiation	GO:0009314	1	3.65213e-08	153	5221	5	80927	GSBRNA2T00137598001,GSBRNA2T00052025001,GSBRNA2T00123748001,GSBRNA2T00134987001,GSBRNA2T00128202001
GO:BP	response to light stimulus	GO:0009416	1	3.65213e-08	151	5221	5	80927	GSBRNA2T00137598001,GSBRNA2T00052025001,GSBRNA2T00123748001,GSBRNA2T00134987001,GSBRNA2T00128202001
GO:BP	RNA modification	GO:0009451	1	3.65213e-08	240	5221	9	80927	GSBRNA2T00122310001,GSBRNA2T00132367001,GSBRNA2T00037304001,GSBRNA2T00106704001,GSBRNA2T00114774001,GSBRNA2T00063268001,GSBRNA2T00112685001,GSBRNA2T00115875001,GSBRNA2T00066693001
GO:BP	response to external stimulus	GO:0009605	1	3.65213e-08	288	5221	17	80927	GSBRNA2T00101510001,GSBRNA2T00107143001,GSBRNA2T00137598001,GSBRNA2T00110278001,GSBRNA2T00123748001,GSBRNA2T00037342001,GSBRNA2T00037261001,GSBRNA2T00134987001,GSBRNA2T00081387001,GSBRNA2T00125920001,GSBRNA2T00138970001,GSBRNA2T00151943001,GSBRNA2T00148208001,GSBRNA2T00146110001,GSBRNA2T00114665001,GSBRNA2T00063231001,GSBRNA2T00109484001
GO:BP	brassinosteroid mediated signaling pathway	GO:0009742	1	3.65213e-08	32	5221	1	80927	GSBRNA2T00083129001
GO:BP	response to biotic stimulus	GO:0009607	1	3.65213e-08	164	5221	6	80927	GSBRNA2T00110278001,GSBRNA2T00037261001,GSBRNA2T00151943001,GSBRNA2T00114665001,GSBRNA2T00018447001,GSBRNA2T00109484001
GO:BP	response to red or far red light	GO:0009639	1	3.65213e-08	68	5221	3	80927	GSBRNA2T00137598001,GSBRNA2T00123748001,GSBRNA2T00134987001
GO:BP	anatomical structure morphogenesis	GO:0009653	1	3.65213e-08	72	5221	4	80927	GSBRNA2T00114181001,GSBRNA2T00032758001,GSBRNA2T00151742001,GSBRNA2T00151734001
GO:BP	plastid organization	GO:0009657	1	3.65213e-08	27	5221	1	80927	GSBRNA2T00035679001
GO:BP	chloroplast organization	GO:0009658	1	3.65213e-08	27	5221	1	80927	GSBRNA2T00035679001
GO:BP	response to endogenous stimulus	GO:0009719	1	3.65213e-08	520	5221	28	80927	GSBRNA2T00083129001,GSBRNA2T00130868001,GSBRNA2T00130867001,GSBRNA2T00130550001,GSBRNA2T00136467001,GSBRNA2T00114181001,GSBRNA2T00143729001,GSBRNA2T00154200001,GSBRNA2T00005544001,GSBRNA2T00037261001,GSBRNA2T00141156001,GSBRNA2T00147458001,GSBRNA2T00136702001,GSBRNA2T00086704001,GSBRNA2T00138837001,GSBRNA2T00140858001,GSBRNA2T00151978001,GSBRNA2T00151979001,GSBRNA2T00112376001,GSBRNA2T00094359001…
GO:BP	response to hormone	GO:0009725	1	3.65213e-08	519	5221	28	80927	GSBRNA2T00083129001,GSBRNA2T00130868001,GSBRNA2T00130867001,GSBRNA2T00130550001,GSBRNA2T00136467001,GSBRNA2T00114181001,GSBRNA2T00143729001,GSBRNA2T00154200001,GSBRNA2T00005544001,GSBRNA2T00037261001,GSBRNA2T00141156001,GSBRNA2T00147458001,GSBRNA2T00136702001,GSBRNA2T00086704001,GSBRNA2T00138837001,GSBRNA2T00140858001,GSBRNA2T00151978001,GSBRNA2T00151979001,GSBRNA2T00112376001,GSBRNA2T00094359001…
GO:BP	response to auxin	GO:0009733	1	3.65213e-08	435	5221	23	80927	GSBRNA2T00130868001,GSBRNA2T00130867001,GSBRNA2T00130550001,GSBRNA2T00136467001,GSBRNA2T00114181001,GSBRNA2T00143729001,GSBRNA2T00154200001,GSBRNA2T00136702001,GSBRNA2T00086704001,GSBRNA2T00138837001,GSBRNA2T00140858001,GSBRNA2T00151978001,GSBRNA2T00151979001,GSBRNA2T00112376001,GSBRNA2T00094359001,GSBRNA2T00037198001,GSBRNA2T00146165001,GSBRNA2T00075091001,GSBRNA2T00099367001,GSBRNA2T00121358001…
GO:BP	auxin-activated signaling pathway	GO:0009734	1	3.65213e-08	187	5221	8	80927	GSBRNA2T00130550001,GSBRNA2T00151978001,GSBRNA2T00151979001,GSBRNA2T00112376001,GSBRNA2T00037198001,GSBRNA2T00146165001,GSBRNA2T00121086001,GSBRNA2T00139470001
GO:BP	response to fungus	GO:0009620	1	3.65213e-08	57	5221	3	80927	GSBRNA2T00110278001,GSBRNA2T00151943001,GSBRNA2T00114665001
GO:BP	negative regulation of gene expression	GO:0010629	1	3.65213e-08	239	5221	11	80927	GSBRNA2T00032489001,GSBRNA2T00064188001,GSBRNA2T00078343001,GSBRNA2T00018234001,GSBRNA2T00062085001,GSBRNA2T00078683001,GSBRNA2T00078576001,GSBRNA2T00151926001,GSBRNA2T00080939001,GSBRNA2T00018458001,GSBRNA2T00109440001
GO:BP	phosphate-containing compound metabolic process	GO:0006796	1	3.65213e-08	4707	5221	245	80927	GSBRNA2T00068585001,GSBRNA2T00126502001,GSBRNA2T00126361001,GSBRNA2T00111638001,GSBRNA2T00092278001,GSBRNA2T00051772001,GSBRNA2T00054047001,GSBRNA2T00071355001,GSBRNA2T00104876001,GSBRNA2T00068863001,GSBRNA2T00068862001,GSBRNA2T00026574001,GSBRNA2T00130771001,GSBRNA2T00131215001,GSBRNA2T00130079001,GSBRNA2T00129658001,GSBRNA2T00130000001,GSBRNA2T00088654001,GSBRNA2T00086448001,GSBRNA2T00009885001…
GO:BP	heme biosynthetic process	GO:0006783	1	3.65213e-08	27	5221	1	80927	GSBRNA2T00105410001
GO:BP	chitin metabolic process	GO:0006030	1	3.65213e-08	50	5221	2	80927	GSBRNA2T00139051001,GSBRNA2T00018360001
GO:BP	chitin catabolic process	GO:0006032	1	3.65213e-08	50	5221	2	80927	GSBRNA2T00139051001,GSBRNA2T00018360001
GO:BP	amino sugar metabolic process	GO:0006040	1	3.65213e-08	57	5221	3	80927	GSBRNA2T00139051001,GSBRNA2T00151730001,GSBRNA2T00018360001
GO:BP	cellular aldehyde metabolic process	GO:0006081	1	3.65213e-08	47	5221	2	80927	GSBRNA2T00131020001,GSBRNA2T00078724001
GO:BP	acetyl-CoA metabolic process	GO:0006084	1	3.65213e-08	28	5221	1	80927	GSBRNA2T00028864001
GO:BP	pyruvate metabolic process	GO:0006090	1	3.65213e-08	182	5221	8	80927	GSBRNA2T00093561001,GSBRNA2T00146469001,GSBRNA2T00134657001,GSBRNA2T00134656001,GSBRNA2T00007196001,GSBRNA2T00150980001,GSBRNA2T00068677001,GSBRNA2T00141638001
GO:BP	gluconeogenesis	GO:0006094	1	3.65213e-08	21	5221	1	80927	GSBRNA2T00000695001
GO:BP	glycolytic process	GO:0006096	1	3.65213e-08	151	5221	8	80927	GSBRNA2T00093561001,GSBRNA2T00146469001,GSBRNA2T00134657001,GSBRNA2T00134656001,GSBRNA2T00007196001,GSBRNA2T00150980001,GSBRNA2T00068677001,GSBRNA2T00141638001
GO:BP	aminoglycan catabolic process	GO:0006026	1	3.65213e-08	50	5221	2	80927	GSBRNA2T00139051001,GSBRNA2T00018360001
GO:BP	energy reserve metabolic process	GO:0006112	1	3.65213e-08	20	5221	1	80927	GSBRNA2T00114672001
GO:BP	nucleobase-containing compound metabolic process	GO:0006139	1	3.65213e-08	6266	5221	345	80927	GSBRNA2T00134310001,GSBRNA2T00134537001,GSBRNA2T00083129001,GSBRNA2T00039090001,GSBRNA2T00111781001,GSBRNA2T00005823001,GSBRNA2T00026805001,GSBRNA2T00026833001,GSBRNA2T00042253001,GSBRNA2T00051772001,GSBRNA2T00063980001,GSBRNA2T00071333001,GSBRNA2T00044326001,GSBRNA2T00044371001,GSBRNA2T00123113001,GSBRNA2T00120631001,GSBRNA2T00149561001,GSBRNA2T00149479001,GSBRNA2T00149587001,GSBRNA2T00073188001…
GO:BP	purine nucleobase metabolic process	GO:0006144	1	3.65213e-08	28	5221	1	80927	GSBRNA2T00143476001
GO:BP	purine nucleotide metabolic process	GO:0006163	1	3.65213e-08	415	5221	16	80927	GSBRNA2T00080785001,GSBRNA2T00080784001,GSBRNA2T00093561001,GSBRNA2T00085766001,GSBRNA2T00028864001,GSBRNA2T00000119001,GSBRNA2T00146469001,GSBRNA2T00134657001,GSBRNA2T00134656001,GSBRNA2T00007196001,GSBRNA2T00150980001,GSBRNA2T00151907001,GSBRNA2T00119832001,GSBRNA2T00115611001,GSBRNA2T00068677001,GSBRNA2T00141638001
GO:BP	purine nucleotide biosynthetic process	GO:0006164	1	3.65213e-08	198	5221	7	80927	GSBRNA2T00080785001,GSBRNA2T00080784001,GSBRNA2T00085766001,GSBRNA2T00000119001,GSBRNA2T00151907001,GSBRNA2T00119832001,GSBRNA2T00115611001
GO:BP	nucleoside diphosphate phosphorylation	GO:0006165	1	3.65213e-08	165	5221	8	80927	GSBRNA2T00093561001,GSBRNA2T00146469001,GSBRNA2T00134657001,GSBRNA2T00134656001,GSBRNA2T00007196001,GSBRNA2T00150980001,GSBRNA2T00068677001,GSBRNA2T00141638001
GO:BP	'de novo' pyrimidine nucleobase biosynthetic process	GO:0006207	1	3.65213e-08	24	5221	1	80927	GSBRNA2T00145935001
GO:BP	DNA replication	GO:0006260	1	3.65213e-08	238	5221	9	80927	GSBRNA2T00116951001,GSBRNA2T00155346001,GSBRNA2T00030790001,GSBRNA2T00063471001,GSBRNA2T00152670001,GSBRNA2T00078704001,GSBRNA2T00094368001,GSBRNA2T00146122001,GSBRNA2T00153967001
GO:BP	DNA-dependent DNA replication	GO:0006261	1	3.65213e-08	116	5221	5	80927	GSBRNA2T00116951001,GSBRNA2T00155346001,GSBRNA2T00152670001,GSBRNA2T00078704001,GSBRNA2T00094368001
GO:BP	oxidative phosphorylation	GO:0006119	1	3.65213e-08	39	5221	2	80927	GSBRNA2T00063873001,GSBRNA2T00114725001
GO:BP	nucleotide-excision repair	GO:0006289	1	3.65213e-08	47	5221	2	80927	GSBRNA2T00065365001,GSBRNA2T00105445001
GO:BP	aminoglycan metabolic process	GO:0006022	1	3.65213e-08	50	5221	2	80927	GSBRNA2T00139051001,GSBRNA2T00018360001
GO:BP	trehalose metabolic process	GO:0005991	1	3.65213e-08	53	5221	2	80927	GSBRNA2T00118912001,GSBRNA2T00090182001
GO:BP	autophagosome assembly	GO:0000045	1	3.65213e-08	20	5221	1	80927	GSBRNA2T00153988001
GO:BP	mitotic sister chromatid segregation	GO:0000070	1	3.65213e-08	67	5221	3	80927	GSBRNA2T00071122001,GSBRNA2T00099180001,GSBRNA2T00154913001
GO:BP	MAPK cascade	GO:0000165	1	3.65213e-08	33	5221	1	80927	GSBRNA2T00010311001
GO:BP	mitotic cell cycle	GO:0000278	1	3.65213e-08	121	5221	6	80927	GSBRNA2T00126733001,GSBRNA2T00151747001,GSBRNA2T00071122001,GSBRNA2T00094368001,GSBRNA2T00099180001,GSBRNA2T00154913001
GO:BP	nuclear division	GO:0000280	1	3.65213e-08	112	5221	5	80927	GSBRNA2T00095233001,GSBRNA2T00071122001,GSBRNA2T00099180001,GSBRNA2T00154913001,GSBRNA2T00109534001
GO:BP	response to reactive oxygen species	GO:0000302	1	3.65213e-08	32	5221	1	80927	GSBRNA2T00035751001
GO:BP	response to superoxide	GO:0000303	1	3.65213e-08	29	5221	1	80927	GSBRNA2T00035751001
GO:BP	response to oxygen radical	GO:0000305	1	3.65213e-08	29	5221	1	80927	GSBRNA2T00035751001
GO:BP	trehalose biosynthetic process	GO:0005992	1	3.65213e-08	49	5221	2	80927	GSBRNA2T00118912001,GSBRNA2T00090182001
GO:BP	nuclear-transcribed mRNA catabolic process	GO:0000956	1	3.65213e-08	58	5221	1	80927	GSBRNA2T00109440001
GO:BP	formation of translation preinitiation complex	GO:0001731	1	3.65213e-08	54	5221	2	80927	GSBRNA2T00121890001,GSBRNA2T00155713001
GO:BP	regulation of protein phosphorylation	GO:0001932	1	3.65213e-08	68	5221	2	80927	GSBRNA2T00126733001,GSBRNA2T00151747001
GO:BP	cytoplasmic translation	GO:0002181	1	3.65213e-08	66	5221	2	80927	GSBRNA2T00121890001,GSBRNA2T00155713001
GO:BP	cytoplasmic translational initiation	GO:0002183	1	3.65213e-08	56	5221	2	80927	GSBRNA2T00121890001,GSBRNA2T00155713001
GO:BP	immune system process	GO:0002376	1	3.65213e-08	78	5221	1	80927	GSBRNA2T00037261001
GO:BP	regulation of response to biotic stimulus	GO:0002831	1	3.65213e-08	18	5221	1	80927	GSBRNA2T00037261001
GO:BP	glycogen metabolic process	GO:0005977	1	3.65213e-08	20	5221	1	80927	GSBRNA2T00114672001
GO:BP	starch metabolic process	GO:0005982	1	3.65213e-08	21	5221	1	80927	GSBRNA2T00114672001
GO:BP	RNA methylation	GO:0001510	1	3.65213e-08	84	5221	2	80927	GSBRNA2T00037304001,GSBRNA2T00063268001
GO:BP	phosphorus metabolic process	GO:0006793	1	3.65213e-08	4722	5221	248	80927	GSBRNA2T00068585001,GSBRNA2T00126502001,GSBRNA2T00126361001,GSBRNA2T00111638001,GSBRNA2T00092278001,GSBRNA2T00051772001,GSBRNA2T00054047001,GSBRNA2T00071355001,GSBRNA2T00104876001,GSBRNA2T00068863001,GSBRNA2T00068862001,GSBRNA2T00026574001,GSBRNA2T00130771001,GSBRNA2T00131215001,GSBRNA2T00130079001,GSBRNA2T00129658001,GSBRNA2T00130000001,GSBRNA2T00088654001,GSBRNA2T00086448001,GSBRNA2T00009885001…
GO:BP	DNA packaging	GO:0006323	1	3.65213e-08	104	5221	4	80927	GSBRNA2T00034777001,GSBRNA2T00117730001,GSBRNA2T00030928001,GSBRNA2T00134833001
GO:BP	chromatin assembly or disassembly	GO:0006333	1	3.65213e-08	94	5221	4	80927	GSBRNA2T00034777001,GSBRNA2T00117730001,GSBRNA2T00030928001,GSBRNA2T00134833001
GO:BP	arginine metabolic process	GO:0006525	1	3.65213e-08	37	5221	1	80927	GSBRNA2T00079160001
GO:BP	arginine biosynthetic process	GO:0006526	1	3.65213e-08	25	5221	1	80927	GSBRNA2T00079160001
GO:BP	cysteine metabolic process	GO:0006534	1	3.65213e-08	55	5221	3	80927	GSBRNA2T00000139001,GSBRNA2T00155874001,GSBRNA2T00109483001
GO:BP	cysteine biosynthetic process from serine	GO:0006535	1	3.65213e-08	40	5221	1	80927	GSBRNA2T00109483001
GO:BP	tryptophan metabolic process	GO:0006568	1	3.65213e-08	50	5221	2	80927	GSBRNA2T00114799001,GSBRNA2T00018448001
GO:BP	indolalkylamine metabolic process	GO:0006586	1	3.65213e-08	50	5221	2	80927	GSBRNA2T00114799001,GSBRNA2T00018448001
GO:BP	protein targeting	GO:0006605	1	3.65213e-08	170	5221	8	80927	GSBRNA2T00050074001,GSBRNA2T00032831001,GSBRNA2T00115267001,GSBRNA2T00052545001,GSBRNA2T00054368001,GSBRNA2T00062226001,GSBRNA2T00068198001,GSBRNA2T00021988001
GO:BP	protein targeting to mitochondrion	GO:0006626	1	3.65213e-08	72	5221	4	80927	GSBRNA2T00050074001,GSBRNA2T00032831001,GSBRNA2T00115267001,GSBRNA2T00054368001
GO:BP	ubiquitin-dependent protein catabolic process	GO:0006511	1	3.65213e-08	309	5221	17	80927	GSBRNA2T00004540001,GSBRNA2T00037127001,GSBRNA2T00117809001,GSBRNA2T00069044001,GSBRNA2T00095535001,GSBRNA2T00112786001,GSBRNA2T00088793001,GSBRNA2T00078613001,GSBRNA2T00151756001,GSBRNA2T00151755001,GSBRNA2T00116544001,GSBRNA2T00052464001,GSBRNA2T00098540001,GSBRNA2T00096259001,GSBRNA2T00149162001,GSBRNA2T00155576001,GSBRNA2T00018441001
GO:BP	acyl-CoA metabolic process	GO:0006637	1	3.65213e-08	39	5221	1	80927	GSBRNA2T00028864001
GO:BP	glutathione metabolic process	GO:0006749	1	3.65213e-08	54	5221	2	80927	GSBRNA2T00021856001,GSBRNA2T00109460001
GO:BP	glutathione catabolic process	GO:0006751	1	3.65213e-08	33	5221	1	80927	GSBRNA2T00021856001
GO:BP	nucleoside phosphate metabolic process	GO:0006753	1	3.65213e-08	565	5221	27	80927	GSBRNA2T00051772001,GSBRNA2T00009885001,GSBRNA2T00080785001,GSBRNA2T00080784001,GSBRNA2T00156878001,GSBRNA2T00093561001,GSBRNA2T00031131001,GSBRNA2T00105714001,GSBRNA2T00085766001,GSBRNA2T00069045001,GSBRNA2T00028864001,GSBRNA2T00074672001,GSBRNA2T00000119001,GSBRNA2T00146469001,GSBRNA2T00134657001,GSBRNA2T00134656001,GSBRNA2T00007196001,GSBRNA2T00150980001,GSBRNA2T00151907001,GSBRNA2T00119832001…
GO:BP	ATP generation from ADP	GO:0006757	1	3.65213e-08	151	5221	8	80927	GSBRNA2T00093561001,GSBRNA2T00146469001,GSBRNA2T00134657001,GSBRNA2T00134656001,GSBRNA2T00007196001,GSBRNA2T00150980001,GSBRNA2T00068677001,GSBRNA2T00141638001
GO:BP	vitamin metabolic process	GO:0006766	1	3.65213e-08	57	5221	1	80927	GSBRNA2T00155426001
GO:BP	water-soluble vitamin metabolic process	GO:0006767	1	3.65213e-08	57	5221	1	80927	GSBRNA2T00155426001
GO:BP	porphyrin-containing compound metabolic process	GO:0006778	1	3.65213e-08	85	5221	2	80927	GSBRNA2T00002877001,GSBRNA2T00105410001
GO:BP	porphyrin-containing compound biosynthetic process	GO:0006779	1	3.65213e-08	72	5221	2	80927	GSBRNA2T00002877001,GSBRNA2T00105410001
GO:BP	cellular aromatic compound metabolic process	GO:0006725	1	3.65213e-08	6715	5221	378	80927	GSBRNA2T00134310001,GSBRNA2T00134408001,GSBRNA2T00134537001,GSBRNA2T00083129001,GSBRNA2T00039090001,GSBRNA2T00111781001,GSBRNA2T00005823001,GSBRNA2T00026805001,GSBRNA2T00026833001,GSBRNA2T00042253001,GSBRNA2T00051772001,GSBRNA2T00063980001,GSBRNA2T00071333001,GSBRNA2T00044326001,GSBRNA2T00044371001,GSBRNA2T00123113001,GSBRNA2T00120631001,GSBRNA2T00149561001,GSBRNA2T00149479001,GSBRNA2T00149587001…
GO:BP	chromatin organization	GO:0006325	1	3.65213e-08	285	5221	13	80927	GSBRNA2T00009905001,GSBRNA2T00034777001,GSBRNA2T00095217001,GSBRNA2T00035792001,GSBRNA2T00117730001,GSBRNA2T00074697001,GSBRNA2T00030928001,GSBRNA2T00134908001,GSBRNA2T00134833001,GSBRNA2T00009277001,GSBRNA2T00146129001,GSBRNA2T00114734001,GSBRNA2T00149038001
GO:BP	protein methylation	GO:0006479	1	3.65213e-08	103	5221	4	80927	GSBRNA2T00095217001,GSBRNA2T00099774001,GSBRNA2T00009277001,GSBRNA2T00100894001
GO:BP	protein acetylation	GO:0006473	1	3.65213e-08	56	5221	1	80927	GSBRNA2T00035792001
GO:BP	nucleosome assembly	GO:0006334	1	3.65213e-08	89	5221	4	80927	GSBRNA2T00034777001,GSBRNA2T00117730001,GSBRNA2T00030928001,GSBRNA2T00134833001
GO:BP	transcription, DNA-templated	GO:0006351	1	3.65213e-08	3667	5221	204	80927	GSBRNA2T00134310001,GSBRNA2T00083129001,GSBRNA2T00026805001,GSBRNA2T00026833001,GSBRNA2T00042253001,GSBRNA2T00063980001,GSBRNA2T00071333001,GSBRNA2T00044326001,GSBRNA2T00044371001,GSBRNA2T00149561001,GSBRNA2T00149587001,GSBRNA2T00073188001,GSBRNA2T00130550001,GSBRNA2T00130641001,GSBRNA2T00101575001,GSBRNA2T00129941001,GSBRNA2T00009860001,GSBRNA2T00009905001,GSBRNA2T00080795001,GSBRNA2T00080768001…
GO:BP	regulation of transcription, DNA-templated	GO:0006355	1	3.65213e-08	3315	5221	186	80927	GSBRNA2T00134310001,GSBRNA2T00083129001,GSBRNA2T00026805001,GSBRNA2T00026833001,GSBRNA2T00042253001,GSBRNA2T00071333001,GSBRNA2T00044326001,GSBRNA2T00044371001,GSBRNA2T00149561001,GSBRNA2T00149587001,GSBRNA2T00073188001,GSBRNA2T00130550001,GSBRNA2T00130641001,GSBRNA2T00101575001,GSBRNA2T00129941001,GSBRNA2T00009905001,GSBRNA2T00080795001,GSBRNA2T00080768001,GSBRNA2T00080799001,GSBRNA2T00010277001…
GO:BP	rRNA processing	GO:0006364	1	3.65213e-08	156	5221	6	80927	GSBRNA2T00039090001,GSBRNA2T00154544001,GSBRNA2T00036881001,GSBRNA2T00134969001,GSBRNA2T00018423001,GSBRNA2T00109562001
GO:BP	RNA processing	GO:0006396	1	3.65213e-08	875	5221	41	80927	GSBRNA2T00134537001,GSBRNA2T00039090001,GSBRNA2T00111781001,GSBRNA2T00149479001,GSBRNA2T00110169001,GSBRNA2T00129689001,GSBRNA2T00136368001,GSBRNA2T00117949001,GSBRNA2T00089488001,GSBRNA2T00154544001,GSBRNA2T00036881001,GSBRNA2T00068972001,GSBRNA2T00137424001,GSBRNA2T00155274001,GSBRNA2T00135162001,GSBRNA2T00037304001,GSBRNA2T00021415001,GSBRNA2T00009425001,GSBRNA2T00106116001,GSBRNA2T00151610001…
GO:BP	mRNA processing	GO:0006397	1	3.65213e-08	347	5221	18	80927	GSBRNA2T00134537001,GSBRNA2T00110169001,GSBRNA2T00129689001,GSBRNA2T00136368001,GSBRNA2T00089488001,GSBRNA2T00068972001,GSBRNA2T00155274001,GSBRNA2T00009425001,GSBRNA2T00106116001,GSBRNA2T00151610001,GSBRNA2T00135019001,GSBRNA2T00091296001,GSBRNA2T00146112001,GSBRNA2T00009080001,GSBRNA2T00125208001,GSBRNA2T00018491001,GSBRNA2T00109527001,GSBRNA2T00109440001
GO:BP	tRNA metabolic process	GO:0006399	1	3.65213e-08	380	5221	21	80927	GSBRNA2T00005823001,GSBRNA2T00123113001,GSBRNA2T00120631001,GSBRNA2T00110274001,GSBRNA2T00117949001,GSBRNA2T00058164001,GSBRNA2T00135162001,GSBRNA2T00037304001,GSBRNA2T00134865001,GSBRNA2T00081050001,GSBRNA2T00060848001,GSBRNA2T00106811001,GSBRNA2T00150673001,GSBRNA2T00124368001,GSBRNA2T00044557001,GSBRNA2T00145926001,GSBRNA2T00145910001,GSBRNA2T00063268001,GSBRNA2T00077486001,GSBRNA2T00015284001…
GO:BP	tRNA modification	GO:0006400	1	3.65213e-08	109	5221	2	80927	GSBRNA2T00037304001,GSBRNA2T00063268001
GO:BP	internal protein amino acid acetylation	GO:0006475	1	3.65213e-08	55	5221	1	80927	GSBRNA2T00035792001
GO:BP	RNA catabolic process	GO:0006401	1	3.65213e-08	90	5221	2	80927	GSBRNA2T00062085001,GSBRNA2T00109440001
GO:BP	translational initiation	GO:0006413	1	3.65213e-08	166	5221	9	80927	GSBRNA2T00121890001,GSBRNA2T00157040001,GSBRNA2T00157047001,GSBRNA2T00089318001,GSBRNA2T00150204001,GSBRNA2T00150205001,GSBRNA2T00151997001,GSBRNA2T00048850001,GSBRNA2T00155713001
GO:BP	translational termination	GO:0006415	1	3.65213e-08	33	5221	1	80927	GSBRNA2T00139380001
GO:BP	regulation of translational elongation	GO:0006448	1	3.65213e-08	22	5221	1	80927	GSBRNA2T00139380001
GO:BP	protein folding	GO:0006457	1	3.65213e-08	298	5221	16	80927	GSBRNA2T00080816001,GSBRNA2T00156189001,GSBRNA2T00035712001,GSBRNA2T00099936001,GSBRNA2T00116757001,GSBRNA2T00062607001,GSBRNA2T00000930001,GSBRNA2T00100492001,GSBRNA2T00027303001,GSBRNA2T00001296001,GSBRNA2T00151751001,GSBRNA2T00075620001,GSBRNA2T00146161001,GSBRNA2T00114843001,GSBRNA2T00114724001,GSBRNA2T00109507001
GO:BP	cellular protein modification process	GO:0006464	1	3.65213e-08	4745	5221	235	80927	GSBRNA2T00126361001,GSBRNA2T00111638001,GSBRNA2T00092278001,GSBRNA2T00054047001,GSBRNA2T00123011001,GSBRNA2T00120848001,GSBRNA2T00085673001,GSBRNA2T00085669001,GSBRNA2T00104876001,GSBRNA2T00047296001,GSBRNA2T00026574001,GSBRNA2T00130771001,GSBRNA2T00131215001,GSBRNA2T00065961001,GSBRNA2T00130079001,GSBRNA2T00129658001,GSBRNA2T00130000001,GSBRNA2T00086448001,GSBRNA2T00009877001,GSBRNA2T00009905001…
GO:BP	signal peptide processing	GO:0006465	1	3.65213e-08	39	5221	2	80927	GSBRNA2T00104946001,GSBRNA2T00044658001
GO:BP	protein phosphorylation	GO:0006468	1	3.65213e-08	2968	5221	127	80927	GSBRNA2T00126361001,GSBRNA2T00111638001,GSBRNA2T00092278001,GSBRNA2T00026574001,GSBRNA2T00130771001,GSBRNA2T00131215001,GSBRNA2T00130079001,GSBRNA2T00129658001,GSBRNA2T00130000001,GSBRNA2T00086448001,GSBRNA2T00009867001,GSBRNA2T00093943001,GSBRNA2T00080757001,GSBRNA2T00122190001,GSBRNA2T00002415001,GSBRNA2T00011257001,GSBRNA2T00156165001,GSBRNA2T00076183001,GSBRNA2T00071696001,GSBRNA2T00126733001…
GO:BP	protein dephosphorylation	GO:0006470	1	3.65213e-08	415	5221	18	80927	GSBRNA2T00054047001,GSBRNA2T00104876001,GSBRNA2T00065386001,GSBRNA2T00032699001,GSBRNA2T00137577001,GSBRNA2T00123778001,GSBRNA2T00104024001,GSBRNA2T00106188001,GSBRNA2T00151478001,GSBRNA2T00129280001,GSBRNA2T00147458001,GSBRNA2T00078604001,GSBRNA2T00032814001,GSBRNA2T00109317001,GSBRNA2T00128410001,GSBRNA2T00091293001,GSBRNA2T00124550001,GSBRNA2T00090807001
GO:BP	mRNA catabolic process	GO:0006402	1	3.65213e-08	74	5221	2	80927	GSBRNA2T00062085001,GSBRNA2T00109440001
GO:BP	Golgi vesicle transport	GO:0048193	1	3.65213e-08	153	5221	6	80927	GSBRNA2T00132353001,GSBRNA2T00141895001,GSBRNA2T00006493001,GSBRNA2T00119159001,GSBRNA2T00125144001,GSBRNA2T00018365001
GO:BP	positive regulation of organelle organization	GO:0010638	1	3.65213e-08	40	5221	2	80927	GSBRNA2T00094842001,GSBRNA2T00078606001
GO:BP	regulation of cell death	GO:0010941	1	3.65213e-08	18	5221	1	80927	GSBRNA2T00067723001
GO:BP	regulation of gene expression, epigenetic	GO:0040029	1	3.65213e-08	26	5221	1	80927	GSBRNA2T00078576001
GO:BP	heme metabolic process	GO:0042168	1	3.65213e-08	35	5221	1	80927	GSBRNA2T00105410001
GO:BP	regulation of protein catabolic process	GO:0042176	1	3.65213e-08	26	5221	1	80927	GSBRNA2T00078816001
GO:BP	cellular modified amino acid catabolic process	GO:0042219	1	3.65213e-08	36	5221	2	80927	GSBRNA2T00021856001,GSBRNA2T00002582001
GO:BP	response to chemical	GO:0042221	1	3.65213e-08	846	5221	51	80927	GSBRNA2T00083129001,GSBRNA2T00052894001,GSBRNA2T00130868001,GSBRNA2T00130867001,GSBRNA2T00130550001,GSBRNA2T00088021001,GSBRNA2T00101570001,GSBRNA2T00009862001,GSBRNA2T00136467001,GSBRNA2T00074877001,GSBRNA2T00114181001,GSBRNA2T00118837001,GSBRNA2T00035751001,GSBRNA2T00061996001,GSBRNA2T00143729001,GSBRNA2T00154200001,GSBRNA2T00005544001,GSBRNA2T00051670001,GSBRNA2T00000056001,GSBRNA2T00037261001…
GO:BP	ribosome biogenesis	GO:0042254	1	3.65213e-08	266	5221	12	80927	GSBRNA2T00039090001,GSBRNA2T00122137001,GSBRNA2T00154544001,GSBRNA2T00036881001,GSBRNA2T00134969001,GSBRNA2T00018529001,GSBRNA2T00057321001,GSBRNA2T00151900001,GSBRNA2T00114774001,GSBRNA2T00115875001,GSBRNA2T00018423001,GSBRNA2T00109562001
GO:BP	ribosome assembly	GO:0042255	1	3.65213e-08	29	5221	1	80927	GSBRNA2T00057321001
GO:BP	ribosomal small subunit biogenesis	GO:0042274	1	3.65213e-08	23	5221	1	80927	GSBRNA2T00057321001
GO:BP	regulation of growth	GO:0040008	1	3.65213e-08	41	5221	1	80927	GSBRNA2T00151742001
GO:BP	regulation of phosphorylation	GO:0042325	1	3.65213e-08	73	5221	2	80927	GSBRNA2T00126733001,GSBRNA2T00151747001
GO:BP	indole-containing compound metabolic process	GO:0042430	1	3.65213e-08	50	5221	2	80927	GSBRNA2T00114799001,GSBRNA2T00018448001
GO:BP	pigment metabolic process	GO:0042440	1	3.65213e-08	106	5221	4	80927	GSBRNA2T00122142001,GSBRNA2T00002877001,GSBRNA2T00105410001,GSBRNA2T00143476001
GO:BP	ATP synthesis coupled electron transport	GO:0042773	1	3.65213e-08	36	5221	2	80927	GSBRNA2T00063873001,GSBRNA2T00114725001
GO:BP	amide transport	GO:0042886	1	3.65213e-08	932	5221	56	80927	GSBRNA2T00134581001,GSBRNA2T00134123001,GSBRNA2T00126293001,GSBRNA2T00055327001,GSBRNA2T00130924001,GSBRNA2T00129903001,GSBRNA2T00009905001,GSBRNA2T00080814001,GSBRNA2T00135968001,GSBRNA2T00074538001,GSBRNA2T00121796001,GSBRNA2T00016053001,GSBRNA2T00035725001,GSBRNA2T00035726001,GSBRNA2T00065351001,GSBRNA2T00021231001,GSBRNA2T00036895001,GSBRNA2T00050074001,GSBRNA2T00137467001,GSBRNA2T00006493001…
GO:BP	negative regulation of catalytic activity	GO:0043086	1	3.65213e-08	245	5221	12	80927	GSBRNA2T00053984001,GSBRNA2T00068962001,GSBRNA2T00054753001,GSBRNA2T00054754001,GSBRNA2T00054755001,GSBRNA2T00054750001,GSBRNA2T00000087001,GSBRNA2T00095623001,GSBRNA2T00069515001,GSBRNA2T00038555001,GSBRNA2T00074126001,GSBRNA2T00066708001
GO:BP	purine-containing compound salvage	GO:0043101	1	3.65213e-08	20	5221	1	80927	GSBRNA2T00143476001
GO:BP	proteasome-mediated ubiquitin-dependent protein catabolic process	GO:0043161	1	3.65213e-08	47	5221	1	80927	GSBRNA2T00088793001
GO:BP	macromolecule metabolic process	GO:0043170	1	3.65213e-08	14144	5221	836	80927	GSBRNA2T00134310001,GSBRNA2T00134579001,GSBRNA2T00134537001,GSBRNA2T00081601001,GSBRNA2T00083129001,GSBRNA2T00126361001,GSBRNA2T00039090001,GSBRNA2T00094614001,GSBRNA2T00094600001,GSBRNA2T00044826001,GSBRNA2T00111781001,GSBRNA2T00111722001,GSBRNA2T00111499001,GSBRNA2T00111655001,GSBRNA2T00111638001,GSBRNA2T00005842001,GSBRNA2T00005823001,GSBRNA2T00026805001,GSBRNA2T00026833001,GSBRNA2T00042253001…
GO:BP	water-soluble vitamin biosynthetic process	GO:0042364	1	3.65213e-08	53	5221	1	80927	GSBRNA2T00155426001
GO:BP	peptide catabolic process	GO:0043171	1	3.65213e-08	33	5221	1	80927	GSBRNA2T00021856001
GO:BP	growth	GO:0040007	1	3.65213e-08	46	5221	1	80927	GSBRNA2T00151742001
GO:BP	thioester metabolic process	GO:0035383	1	3.65213e-08	39	5221	1	80927	GSBRNA2T00028864001
GO:BP	response to lipid	GO:0033993	1	3.65213e-08	74	5221	4	80927	GSBRNA2T00083129001,GSBRNA2T00005544001,GSBRNA2T00141156001,GSBRNA2T00147458001
GO:BP	purine nucleoside bisphosphate metabolic process	GO:0034032	1	3.65213e-08	101	5221	1	80927	GSBRNA2T00028864001
GO:BP	ncRNA processing	GO:0034470	1	3.65213e-08	336	5221	13	80927	GSBRNA2T00039090001,GSBRNA2T00117949001,GSBRNA2T00154544001,GSBRNA2T00036881001,GSBRNA2T00135162001,GSBRNA2T00037304001,GSBRNA2T00134969001,GSBRNA2T00134865001,GSBRNA2T00081050001,GSBRNA2T00124368001,GSBRNA2T00063268001,GSBRNA2T00018423001,GSBRNA2T00109562001
GO:BP	cellular response to oxidative stress	GO:0034599	1	3.65213e-08	30	5221	1	80927	GSBRNA2T00035751001
GO:BP	cellular protein localization	GO:0034613	1	3.65213e-08	668	5221	38	80927	GSBRNA2T00134123001,GSBRNA2T00126293001,GSBRNA2T00130924001,GSBRNA2T00009905001,GSBRNA2T00074538001,GSBRNA2T00035725001,GSBRNA2T00035726001,GSBRNA2T00065351001,GSBRNA2T00061975001,GSBRNA2T00050074001,GSBRNA2T00137467001,GSBRNA2T00006493001,GSBRNA2T00012890001,GSBRNA2T00151695001,GSBRNA2T00153695001,GSBRNA2T00018574001,GSBRNA2T00018529001,GSBRNA2T00078632001,GSBRNA2T00032831001,GSBRNA2T00115267001…
GO:BP	cellular response to reactive oxygen species	GO:0034614	1	3.65213e-08	29	5221	1	80927	GSBRNA2T00035751001
GO:BP	cellular protein-containing complex assembly	GO:0034622	1	3.65213e-08	463	5221	24	80927	GSBRNA2T00111677001,GSBRNA2T00149613001,GSBRNA2T00110169001,GSBRNA2T00130293001,GSBRNA2T00034777001,GSBRNA2T00121890001,GSBRNA2T00133018001,GSBRNA2T00094842001,GSBRNA2T00117730001,GSBRNA2T00030928001,GSBRNA2T00134966001,GSBRNA2T00134833001,GSBRNA2T00157536001,GSBRNA2T00152712001,GSBRNA2T00078606001,GSBRNA2T00057321001,GSBRNA2T00034922001,GSBRNA2T00109402001,GSBRNA2T00064742001,GSBRNA2T00064741001…
GO:BP	cellular nitrogen compound metabolic process	GO:0034641	1	3.65213e-08	8167	5221	466	80927	GSBRNA2T00134310001,GSBRNA2T00134579001,GSBRNA2T00134408001,GSBRNA2T00134537001,GSBRNA2T00083129001,GSBRNA2T00039090001,GSBRNA2T00094614001,GSBRNA2T00044826001,GSBRNA2T00111781001,GSBRNA2T00111722001,GSBRNA2T00005823001,GSBRNA2T00026805001,GSBRNA2T00026833001,GSBRNA2T00042253001,GSBRNA2T00051772001,GSBRNA2T00063980001,GSBRNA2T00071333001,GSBRNA2T00044326001,GSBRNA2T00044371001,GSBRNA2T00123113001…
GO:BP	protein modification process	GO:0036211	1	3.65213e-08	4745	5221	235	80927	GSBRNA2T00126361001,GSBRNA2T00111638001,GSBRNA2T00092278001,GSBRNA2T00054047001,GSBRNA2T00123011001,GSBRNA2T00120848001,GSBRNA2T00085673001,GSBRNA2T00085669001,GSBRNA2T00104876001,GSBRNA2T00047296001,GSBRNA2T00026574001,GSBRNA2T00130771001,GSBRNA2T00131215001,GSBRNA2T00065961001,GSBRNA2T00130079001,GSBRNA2T00129658001,GSBRNA2T00130000001,GSBRNA2T00086448001,GSBRNA2T00009877001,GSBRNA2T00009905001…
GO:BP	nucleobase-containing compound biosynthetic process	GO:0034654	1	3.65213e-08	4139	5221	230	80927	GSBRNA2T00134310001,GSBRNA2T00083129001,GSBRNA2T00026805001,GSBRNA2T00026833001,GSBRNA2T00042253001,GSBRNA2T00051772001,GSBRNA2T00063980001,GSBRNA2T00071333001,GSBRNA2T00044326001,GSBRNA2T00044371001,GSBRNA2T00149561001,GSBRNA2T00149587001,GSBRNA2T00073188001,GSBRNA2T00130550001,GSBRNA2T00130641001,GSBRNA2T00101575001,GSBRNA2T00129941001,GSBRNA2T00009885001,GSBRNA2T00009860001,GSBRNA2T00009905001…
GO:BP	ncRNA metabolic process	GO:0034660	1	3.65213e-08	540	5221	27	80927	GSBRNA2T00039090001,GSBRNA2T00005823001,GSBRNA2T00123113001,GSBRNA2T00120631001,GSBRNA2T00110274001,GSBRNA2T00117949001,GSBRNA2T00058164001,GSBRNA2T00154544001,GSBRNA2T00036881001,GSBRNA2T00135162001,GSBRNA2T00037304001,GSBRNA2T00134969001,GSBRNA2T00134865001,GSBRNA2T00081050001,GSBRNA2T00060848001,GSBRNA2T00106811001,GSBRNA2T00150673001,GSBRNA2T00124368001,GSBRNA2T00044557001,GSBRNA2T00145926001…
GO:BP	nucleosome organization	GO:0034728	1	3.65213e-08	93	5221	4	80927	GSBRNA2T00034777001,GSBRNA2T00117730001,GSBRNA2T00030928001,GSBRNA2T00134833001
GO:BP	regulation of transmembrane transport	GO:0034762	1	3.65213e-08	31	5221	1	80927	GSBRNA2T00133567001
GO:BP	regulation of ion transmembrane transport	GO:0034765	1	3.65213e-08	31	5221	1	80927	GSBRNA2T00133567001
GO:BP	histone lysine methylation	GO:0034968	1	3.65213e-08	46	5221	1	80927	GSBRNA2T00095217001
GO:BP	regulation of dephosphorylation	GO:0035303	1	3.65213e-08	73	5221	1	80927	GSBRNA2T00124550001
GO:BP	regulation of protein dephosphorylation	GO:0035304	1	3.65213e-08	65	5221	1	80927	GSBRNA2T00124550001
GO:BP	peptidyl-tyrosine dephosphorylation	GO:0035335	1	3.65213e-08	28	5221	1	80927	GSBRNA2T00065386001
GO:BP	nucleobase-containing compound catabolic process	GO:0034655	1	3.65213e-08	117	5221	6	80927	GSBRNA2T00131613001,GSBRNA2T00062085001,GSBRNA2T00086710001,GSBRNA2T00138191001,GSBRNA2T00002582001,GSBRNA2T00109440001
GO:BP	ribonucleoside bisphosphate metabolic process	GO:0033875	1	3.65213e-08	101	5221	1	80927	GSBRNA2T00028864001
GO:BP	response to external biotic stimulus	GO:0043207	1	3.65213e-08	139	5221	5	80927	GSBRNA2T00110278001,GSBRNA2T00037261001,GSBRNA2T00151943001,GSBRNA2T00114665001,GSBRNA2T00109484001
GO:BP	regulation of ion transport	GO:0043269	1	3.65213e-08	38	5221	1	80927	GSBRNA2T00133567001
GO:BP	multi-organism reproductive process	GO:0044703	1	3.65213e-08	54	5221	3	80927	GSBRNA2T00095233001,GSBRNA2T00109328001,GSBRNA2T00109534001
GO:BP	multi-multicellular organism process	GO:0044706	1	3.65213e-08	93	5221	5	80927	GSBRNA2T00131588001,GSBRNA2T00060148001,GSBRNA2T00057109001,GSBRNA2T00102191001,GSBRNA2T00102188001
GO:BP	protein insertion into mitochondrial inner membrane	GO:0045039	1	3.65213e-08	36	5221	1	80927	GSBRNA2T00115267001
GO:BP	innate immune response	GO:0045087	1	3.65213e-08	77	5221	1	80927	GSBRNA2T00037261001
GO:BP	establishment of protein localization	GO:0045184	1	3.65213e-08	890	5221	54	80927	GSBRNA2T00134581001,GSBRNA2T00134123001,GSBRNA2T00126293001,GSBRNA2T00055327001,GSBRNA2T00130924001,GSBRNA2T00129903001,GSBRNA2T00009905001,GSBRNA2T00080814001,GSBRNA2T00135968001,GSBRNA2T00074538001,GSBRNA2T00121796001,GSBRNA2T00016053001,GSBRNA2T00035725001,GSBRNA2T00035726001,GSBRNA2T00065351001,GSBRNA2T00061975001,GSBRNA2T00021231001,GSBRNA2T00036895001,GSBRNA2T00050074001,GSBRNA2T00137467001…
GO:BP	negative regulation of cell cycle	GO:0045786	1	3.65213e-08	45	5221	2	80927	GSBRNA2T00154032001,GSBRNA2T00109531001
GO:BP	regulation of protein kinase activity	GO:0045859	1	3.65213e-08	68	5221	2	80927	GSBRNA2T00126733001,GSBRNA2T00151747001
GO:BP	negative regulation of proteolysis	GO:0045861	1	3.65213e-08	53	5221	2	80927	GSBRNA2T00000087001,GSBRNA2T00074126001
GO:BP	interspecies interaction between organisms	GO:0044419	1	3.65213e-08	178	5221	7	80927	GSBRNA2T00002269001,GSBRNA2T00110278001,GSBRNA2T00037261001,GSBRNA2T00151943001,GSBRNA2T00114665001,GSBRNA2T00021980001,GSBRNA2T00109484001
GO:BP	negative regulation of nucleobase-containing compound metabolic process	GO:0045934	1	3.65213e-08	153	5221	8	80927	GSBRNA2T00032489001,GSBRNA2T00064188001,GSBRNA2T00018234001,GSBRNA2T00078683001,GSBRNA2T00151926001,GSBRNA2T00080939001,GSBRNA2T00018458001,GSBRNA2T00125642001
GO:BP	ATP metabolic process	GO:0046034	1	3.65213e-08	296	5221	17	80927	GSBRNA2T00080785001,GSBRNA2T00080784001,GSBRNA2T00093561001,GSBRNA2T00085766001,GSBRNA2T00063873001,GSBRNA2T00000119001,GSBRNA2T00146469001,GSBRNA2T00134657001,GSBRNA2T00134656001,GSBRNA2T00007196001,GSBRNA2T00150980001,GSBRNA2T00151907001,GSBRNA2T00119832001,GSBRNA2T00114725001,GSBRNA2T00115611001,GSBRNA2T00068677001,GSBRNA2T00141638001
GO:BP	pigment biosynthetic process	GO:0046148	1	3.65213e-08	93	5221	4	80927	GSBRNA2T00122142001,GSBRNA2T00002877001,GSBRNA2T00105410001,GSBRNA2T00143476001
GO:BP	amino sugar catabolic process	GO:0046348	1	3.65213e-08	50	5221	2	80927	GSBRNA2T00139051001,GSBRNA2T00018360001
GO:BP	monosaccharide biosynthetic process	GO:0046364	1	3.65213e-08	21	5221	1	80927	GSBRNA2T00000695001
GO:BP	heterocycle metabolic process	GO:0046483	1	3.65213e-08	6662	5221	370	80927	GSBRNA2T00134310001,GSBRNA2T00134408001,GSBRNA2T00134537001,GSBRNA2T00083129001,GSBRNA2T00039090001,GSBRNA2T00111781001,GSBRNA2T00005823001,GSBRNA2T00026805001,GSBRNA2T00026833001,GSBRNA2T00042253001,GSBRNA2T00051772001,GSBRNA2T00063980001,GSBRNA2T00071333001,GSBRNA2T00044326001,GSBRNA2T00044371001,GSBRNA2T00123113001,GSBRNA2T00120631001,GSBRNA2T00149561001,GSBRNA2T00149479001,GSBRNA2T00149587001…
GO:BP	nicotinamide nucleotide metabolic process	GO:0046496	1	3.65213e-08	28	5221	1	80927	GSBRNA2T00122385001
GO:BP	heterocycle catabolic process	GO:0046700	1	3.65213e-08	150	5221	7	80927	GSBRNA2T00131613001,GSBRNA2T00062085001,GSBRNA2T00112701001,GSBRNA2T00086710001,GSBRNA2T00138191001,GSBRNA2T00002582001,GSBRNA2T00109440001
GO:BP	intracellular transport	GO:0046907	1	3.65213e-08	792	5221	39	80927	GSBRNA2T00134123001,GSBRNA2T00126293001,GSBRNA2T00130924001,GSBRNA2T00009905001,GSBRNA2T00074538001,GSBRNA2T00035725001,GSBRNA2T00035726001,GSBRNA2T00065351001,GSBRNA2T00050074001,GSBRNA2T00137467001,GSBRNA2T00006493001,GSBRNA2T00012890001,GSBRNA2T00085405001,GSBRNA2T00001851001,GSBRNA2T00151695001,GSBRNA2T00153695001,GSBRNA2T00018574001,GSBRNA2T00018529001,GSBRNA2T00078632001,GSBRNA2T00078620001…
GO:BP	ADP metabolic process	GO:0046031	1	3.65213e-08	151	5221	8	80927	GSBRNA2T00093561001,GSBRNA2T00146469001,GSBRNA2T00134657001,GSBRNA2T00134656001,GSBRNA2T00007196001,GSBRNA2T00150980001,GSBRNA2T00068677001,GSBRNA2T00141638001
GO:BP	regulation of protein-containing complex assembly	GO:0043254	1	3.65213e-08	44	5221	2	80927	GSBRNA2T00094842001,GSBRNA2T00078606001
GO:BP	sulfur compound catabolic process	GO:0044273	1	3.65213e-08	37	5221	2	80927	GSBRNA2T00021856001,GSBRNA2T00002582001
GO:BP	cellular nitrogen compound catabolic process	GO:0044270	1	3.65213e-08	147	5221	6	80927	GSBRNA2T00131613001,GSBRNA2T00062085001,GSBRNA2T00086710001,GSBRNA2T00138191001,GSBRNA2T00002582001,GSBRNA2T00109440001
GO:BP	steroid hormone mediated signaling pathway	GO:0043401	1	3.65213e-08	32	5221	1	80927	GSBRNA2T00083129001
GO:BP	macromolecule modification	GO:0043412	1	3.65213e-08	5000	5221	246	80927	GSBRNA2T00126361001,GSBRNA2T00111638001,GSBRNA2T00092278001,GSBRNA2T00054047001,GSBRNA2T00123011001,GSBRNA2T00120848001,GSBRNA2T00085673001,GSBRNA2T00085669001,GSBRNA2T00104876001,GSBRNA2T00047296001,GSBRNA2T00026574001,GSBRNA2T00130771001,GSBRNA2T00131215001,GSBRNA2T00065961001,GSBRNA2T00130079001,GSBRNA2T00129658001,GSBRNA2T00130000001,GSBRNA2T00086448001,GSBRNA2T00009877001,GSBRNA2T00009905001…
GO:BP	macromolecule methylation	GO:0043414	1	3.65213e-08	214	5221	8	80927	GSBRNA2T00000801001,GSBRNA2T00095217001,GSBRNA2T00099774001,GSBRNA2T00037304001,GSBRNA2T00009277001,GSBRNA2T00100894001,GSBRNA2T00079238001,GSBRNA2T00063268001
GO:BP	protein acylation	GO:0043543	1	3.65213e-08	61	5221	1	80927	GSBRNA2T00035792001
GO:BP	regulation of kinase activity	GO:0043549	1	3.65213e-08	73	5221	2	80927	GSBRNA2T00126733001,GSBRNA2T00151747001
GO:BP	modification-dependent macromolecule catabolic process	GO:0043632	1	3.65213e-08	310	5221	17	80927	GSBRNA2T00004540001,GSBRNA2T00037127001,GSBRNA2T00117809001,GSBRNA2T00069044001,GSBRNA2T00095535001,GSBRNA2T00112786001,GSBRNA2T00088793001,GSBRNA2T00078613001,GSBRNA2T00151756001,GSBRNA2T00151755001,GSBRNA2T00116544001,GSBRNA2T00052464001,GSBRNA2T00098540001,GSBRNA2T00096259001,GSBRNA2T00149162001,GSBRNA2T00155576001,GSBRNA2T00018441001
GO:BP	inositol phosphate metabolic process	GO:0043647	1	3.65213e-08	21	5221	1	80927	GSBRNA2T00146159001
GO:BP	regulation of phosphoprotein phosphatase activity	GO:0043666	1	3.65213e-08	65	5221	1	80927	GSBRNA2T00124550001
GO:BP	cellular nitrogen compound biosynthetic process	GO:0044271	1	3.65213e-08	6041	5221	354	80927	GSBRNA2T00134310001,GSBRNA2T00134579001,GSBRNA2T00134408001,GSBRNA2T00083129001,GSBRNA2T00094614001,GSBRNA2T00044826001,GSBRNA2T00111722001,GSBRNA2T00005823001,GSBRNA2T00026805001,GSBRNA2T00026833001,GSBRNA2T00042253001,GSBRNA2T00051772001,GSBRNA2T00063980001,GSBRNA2T00071333001,GSBRNA2T00044326001,GSBRNA2T00044371001,GSBRNA2T00123113001,GSBRNA2T00085609001,GSBRNA2T00120631001,GSBRNA2T00149561001…
GO:BP	protein-containing complex subunit organization	GO:0043933	1	3.65213e-08	566	5221	32	80927	GSBRNA2T00111677001,GSBRNA2T00149651001,GSBRNA2T00149613001,GSBRNA2T00110258001,GSBRNA2T00110169001,GSBRNA2T00130293001,GSBRNA2T00034777001,GSBRNA2T00050662001,GSBRNA2T00121890001,GSBRNA2T00133018001,GSBRNA2T00095288001,GSBRNA2T00154540001,GSBRNA2T00094842001,GSBRNA2T00117730001,GSBRNA2T00030928001,GSBRNA2T00134966001,GSBRNA2T00134833001,GSBRNA2T00096127001,GSBRNA2T00157536001,GSBRNA2T00139380001…
GO:BP	positive regulation of cellular component biogenesis	GO:0044089	1	3.65213e-08	41	5221	2	80927	GSBRNA2T00094842001,GSBRNA2T00078606001
GO:BP	negative regulation of molecular function	GO:0044092	1	3.65213e-08	245	5221	12	80927	GSBRNA2T00053984001,GSBRNA2T00068962001,GSBRNA2T00054753001,GSBRNA2T00054754001,GSBRNA2T00054755001,GSBRNA2T00054750001,GSBRNA2T00000087001,GSBRNA2T00095623001,GSBRNA2T00069515001,GSBRNA2T00038555001,GSBRNA2T00074126001,GSBRNA2T00066708001
GO:BP	positive regulation of molecular function	GO:0044093	1	3.65213e-08	112	5221	6	80927	GSBRNA2T00126733001,GSBRNA2T00000972001,GSBRNA2T00027321001,GSBRNA2T00151747001,GSBRNA2T00048973001,GSBRNA2T00029473001
GO:BP	cellular metabolic process	GO:0044237	1	3.65213e-08	16359	5221	1026	80927	GSBRNA2T00068585001,GSBRNA2T00134310001,GSBRNA2T00134579001,GSBRNA2T00134408001,GSBRNA2T00134537001,GSBRNA2T00134621001,GSBRNA2T00081585001,GSBRNA2T00083129001,GSBRNA2T00083137001,GSBRNA2T00126502001,GSBRNA2T00126361001,GSBRNA2T00039090001,GSBRNA2T00094614001,GSBRNA2T00044826001,GSBRNA2T00087508001,GSBRNA2T00111781001,GSBRNA2T00111722001,GSBRNA2T00111638001,GSBRNA2T00005823001,GSBRNA2T00026805001…
GO:BP	cellular protein catabolic process	GO:0044257	1	3.65213e-08	354	5221	20	80927	GSBRNA2T00004540001,GSBRNA2T00037127001,GSBRNA2T00005644001,GSBRNA2T00117809001,GSBRNA2T00069044001,GSBRNA2T00105377001,GSBRNA2T00095535001,GSBRNA2T00112786001,GSBRNA2T00134993001,GSBRNA2T00088793001,GSBRNA2T00078613001,GSBRNA2T00151756001,GSBRNA2T00151755001,GSBRNA2T00116544001,GSBRNA2T00052464001,GSBRNA2T00098540001,GSBRNA2T00096259001,GSBRNA2T00149162001,GSBRNA2T00155576001,GSBRNA2T00018441001
GO:BP	cellular macromolecule metabolic process	GO:0044260	1	3.65213e-08	11359	5221	639	80927	GSBRNA2T00134310001,GSBRNA2T00134579001,GSBRNA2T00083129001,GSBRNA2T00126361001,GSBRNA2T00094614001,GSBRNA2T00044826001,GSBRNA2T00111722001,GSBRNA2T00111638001,GSBRNA2T00005823001,GSBRNA2T00026805001,GSBRNA2T00026833001,GSBRNA2T00042253001,GSBRNA2T00092278001,GSBRNA2T00063980001,GSBRNA2T00054047001,GSBRNA2T00071333001,GSBRNA2T00044326001,GSBRNA2T00044371001,GSBRNA2T00123011001,GSBRNA2T00123113001…
GO:BP	cellular macromolecule catabolic process	GO:0044265	1	3.65213e-08	510	5221	27	80927	GSBRNA2T00004540001,GSBRNA2T00037127001,GSBRNA2T00005644001,GSBRNA2T00131613001,GSBRNA2T00117809001,GSBRNA2T00069044001,GSBRNA2T00105377001,GSBRNA2T00062085001,GSBRNA2T00095535001,GSBRNA2T00112786001,GSBRNA2T00134993001,GSBRNA2T00088793001,GSBRNA2T00086710001,GSBRNA2T00078613001,GSBRNA2T00139051001,GSBRNA2T00151756001,GSBRNA2T00151755001,GSBRNA2T00116544001,GSBRNA2T00052464001,GSBRNA2T00138191001…
GO:BP	cellular protein metabolic process	GO:0044267	1	3.65213e-08	6697	5221	357	80927	GSBRNA2T00134579001,GSBRNA2T00126361001,GSBRNA2T00094614001,GSBRNA2T00044826001,GSBRNA2T00111722001,GSBRNA2T00111638001,GSBRNA2T00005823001,GSBRNA2T00092278001,GSBRNA2T00054047001,GSBRNA2T00123011001,GSBRNA2T00123113001,GSBRNA2T00120848001,GSBRNA2T00085673001,GSBRNA2T00085669001,GSBRNA2T00085609001,GSBRNA2T00104946001,GSBRNA2T00104876001,GSBRNA2T00120631001,GSBRNA2T00047296001,GSBRNA2T00004540001…
GO:BP	regulation of cellular component biogenesis	GO:0044087	1	3.65213e-08	53	5221	2	80927	GSBRNA2T00094842001,GSBRNA2T00078606001
GO:BP	regulation of phosphatase activity	GO:0010921	1	3.65213e-08	68	5221	1	80927	GSBRNA2T00124550001
GO:BP	nucleoside bisphosphate metabolic process	GO:0033865	1	3.65213e-08	101	5221	1	80927	GSBRNA2T00028864001
GO:BP	tetrapyrrole biosynthetic process	GO:0033014	1	3.65213e-08	91	5221	5	80927	GSBRNA2T00080761001,GSBRNA2T00002877001,GSBRNA2T00105410001,GSBRNA2T00134647001,GSBRNA2T00084974001
GO:BP	histone acetylation	GO:0016573	1	3.65213e-08	55	5221	1	80927	GSBRNA2T00035792001
GO:BP	protein deubiquitination	GO:0016579	1	3.65213e-08	119	5221	5	80927	GSBRNA2T00009905001,GSBRNA2T00069044001,GSBRNA2T00046016001,GSBRNA2T00078613001,GSBRNA2T00096259001
GO:BP	cell wall macromolecule catabolic process	GO:0016998	1	3.65213e-08	50	5221	2	80927	GSBRNA2T00139051001,GSBRNA2T00018360001
GO:BP	peptidyl-lysine methylation	GO:0018022	1	3.65213e-08	52	5221	1	80927	GSBRNA2T00095217001
GO:BP	peptidyl-tyrosine phosphorylation	GO:0018108	1	3.65213e-08	22	5221	1	80927	GSBRNA2T00063296001
GO:BP	heterocycle biosynthetic process	GO:0018130	1	3.65213e-08	4454	5221	250	80927	GSBRNA2T00134310001,GSBRNA2T00134408001,GSBRNA2T00083129001,GSBRNA2T00026805001,GSBRNA2T00026833001,GSBRNA2T00042253001,GSBRNA2T00051772001,GSBRNA2T00063980001,GSBRNA2T00071333001,GSBRNA2T00044326001,GSBRNA2T00044371001,GSBRNA2T00149561001,GSBRNA2T00149587001,GSBRNA2T00073188001,GSBRNA2T00130550001,GSBRNA2T00130641001,GSBRNA2T00101575001,GSBRNA2T00129941001,GSBRNA2T00009885001,GSBRNA2T00009860001…
GO:BP	peptidyl-amino acid modification	GO:0018193	1	3.65213e-08	305	5221	16	80927	GSBRNA2T00120848001,GSBRNA2T00080761001,GSBRNA2T00095217001,GSBRNA2T00035712001,GSBRNA2T00035792001,GSBRNA2T00099774001,GSBRNA2T00133275001,GSBRNA2T00063854001,GSBRNA2T00134949001,GSBRNA2T00024691001,GSBRNA2T00120139001,GSBRNA2T00063296001,GSBRNA2T00105098001,GSBRNA2T00105091001,GSBRNA2T00105092001,GSBRNA2T00043402001
GO:BP	peptidyl-lysine modification	GO:0018205	1	3.65213e-08	139	5221	2	80927	GSBRNA2T00095217001,GSBRNA2T00035792001
GO:BP	histone methylation	GO:0016571	1	3.65213e-08	51	5221	2	80927	GSBRNA2T00095217001,GSBRNA2T00009277001
GO:BP	peptidyl-tyrosine modification	GO:0018212	1	3.65213e-08	22	5221	1	80927	GSBRNA2T00063296001
GO:BP	internal peptidyl-lysine acetylation	GO:0018393	1	3.65213e-08	55	5221	1	80927	GSBRNA2T00035792001
GO:BP	peptidyl-lysine acetylation	GO:0018394	1	3.65213e-08	55	5221	1	80927	GSBRNA2T00035792001
GO:BP	regulation of nucleobase-containing compound metabolic process	GO:0019219	1	3.65213e-08	3373	5221	186	80927	GSBRNA2T00134310001,GSBRNA2T00083129001,GSBRNA2T00026805001,GSBRNA2T00026833001,GSBRNA2T00042253001,GSBRNA2T00071333001,GSBRNA2T00044326001,GSBRNA2T00044371001,GSBRNA2T00149561001,GSBRNA2T00149587001,GSBRNA2T00073188001,GSBRNA2T00130550001,GSBRNA2T00130641001,GSBRNA2T00101575001,GSBRNA2T00129941001,GSBRNA2T00009905001,GSBRNA2T00080795001,GSBRNA2T00080768001,GSBRNA2T00080799001,GSBRNA2T00010277001…
GO:BP	regulation of phosphate metabolic process	GO:0019220	1	3.65213e-08	146	5221	3	80927	GSBRNA2T00126733001,GSBRNA2T00151747001,GSBRNA2T00124550001
GO:BP	regulation of metabolic process	GO:0019222	1	3.65213e-08	4021	5221	235	80927	GSBRNA2T00134310001,GSBRNA2T00081585001,GSBRNA2T00083129001,GSBRNA2T00026805001,GSBRNA2T00026833001,GSBRNA2T00042253001,GSBRNA2T00071333001,GSBRNA2T00044326001,GSBRNA2T00044371001,GSBRNA2T00085609001,GSBRNA2T00149561001,GSBRNA2T00149587001,GSBRNA2T00073188001,GSBRNA2T00130550001,GSBRNA2T00130641001,GSBRNA2T00065864001,GSBRNA2T00101575001,GSBRNA2T00129941001,GSBRNA2T00009905001,GSBRNA2T00080795001…
GO:BP	hexose biosynthetic process	GO:0019319	1	3.65213e-08	21	5221	1	80927	GSBRNA2T00000695001
GO:BP	cysteine biosynthetic process	GO:0019344	1	3.65213e-08	41	5221	1	80927	GSBRNA2T00109483001
GO:BP	nicotinamide nucleotide biosynthetic process	GO:0019359	1	3.65213e-08	28	5221	1	80927	GSBRNA2T00122385001
GO:BP	protein-chromophore linkage	GO:0018298	1	3.65213e-08	59	5221	3	80927	GSBRNA2T00009877001,GSBRNA2T00076226001,GSBRNA2T00095036001
GO:BP	pyridine nucleotide metabolic process	GO:0019362	1	3.65213e-08	28	5221	1	80927	GSBRNA2T00122385001
GO:BP	histone modification	GO:0016570	1	3.65213e-08	137	5221	5	80927	GSBRNA2T00009905001,GSBRNA2T00095217001,GSBRNA2T00035792001,GSBRNA2T00009277001,GSBRNA2T00146129001
GO:BP	protein processing	GO:0016485	1	3.65213e-08	84	5221	4	80927	GSBRNA2T00104946001,GSBRNA2T00044658001,GSBRNA2T00091223001,GSBRNA2T00065634001
GO:BP	negative regulation of endopeptidase activity	GO:0010951	1	3.65213e-08	53	5221	2	80927	GSBRNA2T00000087001,GSBRNA2T00074126001
GO:BP	response to organic cyclic compound	GO:0014070	1	3.65213e-08	50	5221	2	80927	GSBRNA2T00083129001,GSBRNA2T00071535001
GO:BP	protein transport	GO:0015031	1	3.65213e-08	877	5221	53	80927	GSBRNA2T00134581001,GSBRNA2T00134123001,GSBRNA2T00126293001,GSBRNA2T00055327001,GSBRNA2T00130924001,GSBRNA2T00129903001,GSBRNA2T00009905001,GSBRNA2T00080814001,GSBRNA2T00135968001,GSBRNA2T00074538001,GSBRNA2T00121796001,GSBRNA2T00016053001,GSBRNA2T00035725001,GSBRNA2T00035726001,GSBRNA2T00065351001,GSBRNA2T00021231001,GSBRNA2T00036895001,GSBRNA2T00050074001,GSBRNA2T00137467001,GSBRNA2T00006493001…
GO:BP	inorganic anion transport	GO:0015698	1	3.65213e-08	157	5221	7	80927	GSBRNA2T00126427001,GSBRNA2T00100969001,GSBRNA2T00081088001,GSBRNA2T00071129001,GSBRNA2T00108138001,GSBRNA2T00015696001,GSBRNA2T00018454001
GO:BP	organophosphate ester transport	GO:0015748	1	3.65213e-08	48	5221	1	80927	GSBRNA2T00105361001
GO:BP	peptide transport	GO:0015833	1	3.65213e-08	929	5221	56	80927	GSBRNA2T00134581001,GSBRNA2T00134123001,GSBRNA2T00126293001,GSBRNA2T00055327001,GSBRNA2T00130924001,GSBRNA2T00129903001,GSBRNA2T00009905001,GSBRNA2T00080814001,GSBRNA2T00135968001,GSBRNA2T00074538001,GSBRNA2T00121796001,GSBRNA2T00016053001,GSBRNA2T00035725001,GSBRNA2T00035726001,GSBRNA2T00065351001,GSBRNA2T00021231001,GSBRNA2T00036895001,GSBRNA2T00050074001,GSBRNA2T00137467001,GSBRNA2T00006493001…
GO:BP	phospholipid transport	GO:0015914	1	3.65213e-08	39	5221	1	80927	GSBRNA2T00105361001
GO:BP	photosynthesis	GO:0015979	1	3.65213e-08	313	5221	12	80927	GSBRNA2T00091003001,GSBRNA2T00009877001,GSBRNA2T00002877001,GSBRNA2T00076226001,GSBRNA2T00095036001,GSBRNA2T00134966001,GSBRNA2T00109402001,GSBRNA2T00120227001,GSBRNA2T00098486001,GSBRNA2T00018465001,GSBRNA2T00018440001,GSBRNA2T00018506001
GO:BP	covalent chromatin modification	GO:0016569	1	3.65213e-08	137	5221	5	80927	GSBRNA2T00009905001,GSBRNA2T00095217001,GSBRNA2T00035792001,GSBRNA2T00009277001,GSBRNA2T00146129001
GO:BP	chlorophyll metabolic process	GO:0015994	1	3.65213e-08	35	5221	1	80927	GSBRNA2T00002877001
GO:BP	cell growth	GO:0016049	1	3.65213e-08	21	5221	1	80927	GSBRNA2T00151742001
GO:BP	RNA metabolic process	GO:0016070	1	3.65213e-08	5035	5221	272	80927	GSBRNA2T00134310001,GSBRNA2T00134537001,GSBRNA2T00083129001,GSBRNA2T00039090001,GSBRNA2T00111781001,GSBRNA2T00005823001,GSBRNA2T00026805001,GSBRNA2T00026833001,GSBRNA2T00042253001,GSBRNA2T00063980001,GSBRNA2T00071333001,GSBRNA2T00044326001,GSBRNA2T00044371001,GSBRNA2T00123113001,GSBRNA2T00120631001,GSBRNA2T00149561001,GSBRNA2T00149479001,GSBRNA2T00149587001,GSBRNA2T00073188001,GSBRNA2T00110274001…
GO:BP	mRNA metabolic process	GO:0016071	1	3.65213e-08	407	5221	20	80927	GSBRNA2T00134537001,GSBRNA2T00110169001,GSBRNA2T00129689001,GSBRNA2T00136368001,GSBRNA2T00089488001,GSBRNA2T00068972001,GSBRNA2T00155274001,GSBRNA2T00062085001,GSBRNA2T00009425001,GSBRNA2T00106116001,GSBRNA2T00151610001,GSBRNA2T00135019001,GSBRNA2T00145608001,GSBRNA2T00091296001,GSBRNA2T00146112001,GSBRNA2T00009080001,GSBRNA2T00125208001,GSBRNA2T00018491001,GSBRNA2T00109527001,GSBRNA2T00109440001
GO:BP	rRNA metabolic process	GO:0016072	1	3.65213e-08	162	5221	6	80927	GSBRNA2T00039090001,GSBRNA2T00154544001,GSBRNA2T00036881001,GSBRNA2T00134969001,GSBRNA2T00018423001,GSBRNA2T00109562001
GO:BP	vesicle-mediated transport	GO:0016192	1	3.65213e-08	640	5221	25	80927	GSBRNA2T00130924001,GSBRNA2T00129956001,GSBRNA2T00135631001,GSBRNA2T00065351001,GSBRNA2T00036895001,GSBRNA2T00132353001,GSBRNA2T00141895001,GSBRNA2T00006493001,GSBRNA2T00119159001,GSBRNA2T00061201001,GSBRNA2T00151527001,GSBRNA2T00015090001,GSBRNA2T00031576001,GSBRNA2T00091244001,GSBRNA2T00078650001,GSBRNA2T00140363001,GSBRNA2T00151866001,GSBRNA2T00048862001,GSBRNA2T00012814001,GSBRNA2T00143345001…
GO:BP	phosphorylation	GO:0016310	1	3.65213e-08	3424	5221	161	80927	GSBRNA2T00068585001,GSBRNA2T00126361001,GSBRNA2T00111638001,GSBRNA2T00092278001,GSBRNA2T00068863001,GSBRNA2T00026574001,GSBRNA2T00130771001,GSBRNA2T00131215001,GSBRNA2T00130079001,GSBRNA2T00129658001,GSBRNA2T00130000001,GSBRNA2T00086448001,GSBRNA2T00009885001,GSBRNA2T00009867001,GSBRNA2T00093943001,GSBRNA2T00080757001,GSBRNA2T00122190001,GSBRNA2T00002415001,GSBRNA2T00011257001,GSBRNA2T00156165001…
GO:BP	dephosphorylation	GO:0016311	1	3.65213e-08	593	5221	34	80927	GSBRNA2T00054047001,GSBRNA2T00071355001,GSBRNA2T00104876001,GSBRNA2T00122075001,GSBRNA2T00058483001,GSBRNA2T00035702001,GSBRNA2T00090182001,GSBRNA2T00065386001,GSBRNA2T00078782001,GSBRNA2T00032699001,GSBRNA2T00137577001,GSBRNA2T00010317001,GSBRNA2T00123778001,GSBRNA2T00104024001,GSBRNA2T00106188001,GSBRNA2T00151478001,GSBRNA2T00129280001,GSBRNA2T00083710001,GSBRNA2T00147458001,GSBRNA2T00087068001…
GO:BP	gene silencing	GO:0016458	1	3.65213e-08	67	5221	2	80927	GSBRNA2T00078343001,GSBRNA2T00078576001
GO:BP	chlorophyll biosynthetic process	GO:0015995	1	3.65213e-08	30	5221	1	80927	GSBRNA2T00002877001
GO:BP	regulation of organelle organization	GO:0033043	1	3.65213e-08	100	5221	4	80927	GSBRNA2T00126733001,GSBRNA2T00094842001,GSBRNA2T00078606001,GSBRNA2T00151747001
GO:BP	pyridine nucleotide biosynthetic process	GO:0019363	1	3.65213e-08	28	5221	1	80927	GSBRNA2T00122385001
GO:BP	aromatic compound biosynthetic process	GO:0019438	1	3.65213e-08	4426	5221	251	80927	GSBRNA2T00134310001,GSBRNA2T00134408001,GSBRNA2T00083129001,GSBRNA2T00026805001,GSBRNA2T00026833001,GSBRNA2T00042253001,GSBRNA2T00051772001,GSBRNA2T00063980001,GSBRNA2T00071333001,GSBRNA2T00044326001,GSBRNA2T00044371001,GSBRNA2T00149561001,GSBRNA2T00149587001,GSBRNA2T00073188001,GSBRNA2T00130550001,GSBRNA2T00130641001,GSBRNA2T00101575001,GSBRNA2T00129941001,GSBRNA2T00009885001,GSBRNA2T00009860001…
GO:BP	positive regulation of protein-containing complex assembly	GO:0031334	1	3.65213e-08	40	5221	2	80927	GSBRNA2T00094842001,GSBRNA2T00078606001
GO:BP	regulation of defense response	GO:0031347	1	3.65213e-08	36	5221	2	80927	GSBRNA2T00037261001,GSBRNA2T00071535001
GO:BP	regulation of protein modification process	GO:0031399	1	3.65213e-08	169	5221	3	80927	GSBRNA2T00126733001,GSBRNA2T00151747001,GSBRNA2T00124550001
GO:BP	positive regulation of protein modification process	GO:0031401	1	3.65213e-08	47	5221	2	80927	GSBRNA2T00126733001,GSBRNA2T00151747001
GO:BP	chromatin assembly	GO:0031497	1	3.65213e-08	90	5221	4	80927	GSBRNA2T00034777001,GSBRNA2T00117730001,GSBRNA2T00030928001,GSBRNA2T00134833001
GO:BP	regulation of response to external stimulus	GO:0032101	1	3.65213e-08	18	5221	1	80927	GSBRNA2T00037261001
GO:BP	methylation	GO:0032259	1	3.65213e-08	340	5221	17	80927	GSBRNA2T00054076001,GSBRNA2T00054077001,GSBRNA2T00000801001,GSBRNA2T00095217001,GSBRNA2T00099774001,GSBRNA2T00037304001,GSBRNA2T00063503001,GSBRNA2T00009277001,GSBRNA2T00078650001,GSBRNA2T00100894001,GSBRNA2T00079238001,GSBRNA2T00063270001,GSBRNA2T00063268001,GSBRNA2T00038754001,GSBRNA2T00029303001,GSBRNA2T00081138001,GSBRNA2T00018384001
GO:BP	regulation of cellular protein metabolic process	GO:0032268	1	3.65213e-08	268	5221	8	80927	GSBRNA2T00085609001,GSBRNA2T00126733001,GSBRNA2T00000087001,GSBRNA2T00139380001,GSBRNA2T00006418001,GSBRNA2T00074126001,GSBRNA2T00151747001,GSBRNA2T00124550001
GO:BP	regulation of cellular catabolic process	GO:0031329	1	3.65213e-08	18	5221	1	80927	GSBRNA2T00111131001
GO:BP	negative regulation of cellular protein metabolic process	GO:0032269	1	3.65213e-08	83	5221	2	80927	GSBRNA2T00000087001,GSBRNA2T00074126001
GO:BP	regulation of protein polymerization	GO:0032271	1	3.65213e-08	44	5221	2	80927	GSBRNA2T00094842001,GSBRNA2T00078606001
GO:BP	positive regulation of protein polymerization	GO:0032273	1	3.65213e-08	40	5221	2	80927	GSBRNA2T00094842001,GSBRNA2T00078606001
GO:BP	multicellular organismal process	GO:0032501	1	3.65213e-08	479	5221	27	80927	GSBRNA2T00130502001,GSBRNA2T00101575001,GSBRNA2T00037127001,GSBRNA2T00095233001,GSBRNA2T00114181001,GSBRNA2T00064199001,GSBRNA2T00131588001,GSBRNA2T00060148001,GSBRNA2T00137449001,GSBRNA2T00052025001,GSBRNA2T00074697001,GSBRNA2T00124025001,GSBRNA2T00033324001,GSBRNA2T00057109001,GSBRNA2T00112786001,GSBRNA2T00107612001,GSBRNA2T00138963001,GSBRNA2T00151882001,GSBRNA2T00128202001,GSBRNA2T00024664001…
GO:BP	developmental process	GO:0032502	1	3.65213e-08	490	5221	27	80927	GSBRNA2T00071333001,GSBRNA2T00130502001,GSBRNA2T00101575001,GSBRNA2T00037127001,GSBRNA2T00114181001,GSBRNA2T00064199001,GSBRNA2T00137449001,GSBRNA2T00052025001,GSBRNA2T00074697001,GSBRNA2T00124025001,GSBRNA2T00033324001,GSBRNA2T00086964001,GSBRNA2T00112786001,GSBRNA2T00107612001,GSBRNA2T00032758001,GSBRNA2T00138963001,GSBRNA2T00151742001,GSBRNA2T00151882001,GSBRNA2T00151734001,GSBRNA2T00128202001…
GO:BP	RNA biosynthetic process	GO:0032774	1	3.65213e-08	3704	5221	205	80927	GSBRNA2T00134310001,GSBRNA2T00083129001,GSBRNA2T00026805001,GSBRNA2T00026833001,GSBRNA2T00042253001,GSBRNA2T00063980001,GSBRNA2T00071333001,GSBRNA2T00044326001,GSBRNA2T00044371001,GSBRNA2T00149561001,GSBRNA2T00149587001,GSBRNA2T00073188001,GSBRNA2T00130550001,GSBRNA2T00130641001,GSBRNA2T00101575001,GSBRNA2T00129941001,GSBRNA2T00009860001,GSBRNA2T00009905001,GSBRNA2T00080795001,GSBRNA2T00080768001…
GO:BP	cellular response to hormone stimulus	GO:0032870	1	3.65213e-08	237	5221	10	80927	GSBRNA2T00083129001,GSBRNA2T00130550001,GSBRNA2T00037261001,GSBRNA2T00151978001,GSBRNA2T00151979001,GSBRNA2T00112376001,GSBRNA2T00037198001,GSBRNA2T00146165001,GSBRNA2T00121086001,GSBRNA2T00139470001
GO:BP	regulation of localization	GO:0032879	1	3.65213e-08	44	5221	1	80927	GSBRNA2T00133567001
GO:BP	tetrapyrrole metabolic process	GO:0033013	1	3.65213e-08	104	5221	5	80927	GSBRNA2T00080761001,GSBRNA2T00002877001,GSBRNA2T00105410001,GSBRNA2T00134647001,GSBRNA2T00084974001
GO:BP	positive regulation of cellular protein metabolic process	GO:0032270	1	3.65213e-08	64	5221	3	80927	GSBRNA2T00126733001,GSBRNA2T00139380001,GSBRNA2T00151747001
GO:BP	removal of superoxide radicals	GO:0019430	1	3.65213e-08	29	5221	1	80927	GSBRNA2T00035751001
GO:BP	negative regulation of cellular biosynthetic process	GO:0031327	1	3.65213e-08	156	5221	8	80927	GSBRNA2T00032489001,GSBRNA2T00064188001,GSBRNA2T00018234001,GSBRNA2T00078683001,GSBRNA2T00151926001,GSBRNA2T00080939001,GSBRNA2T00018458001,GSBRNA2T00125642001
GO:BP	negative regulation of cellular metabolic process	GO:0031324	1	3.65213e-08	250	5221	10	80927	GSBRNA2T00032489001,GSBRNA2T00064188001,GSBRNA2T00018234001,GSBRNA2T00000087001,GSBRNA2T00078683001,GSBRNA2T00074126001,GSBRNA2T00151926001,GSBRNA2T00080939001,GSBRNA2T00018458001,GSBRNA2T00125642001
GO:BP	protein metabolic process	GO:0019538	1	3.65213e-08	7996	5221	443	80927	GSBRNA2T00134579001,GSBRNA2T00081601001,GSBRNA2T00126361001,GSBRNA2T00094614001,GSBRNA2T00044826001,GSBRNA2T00111722001,GSBRNA2T00111499001,GSBRNA2T00111655001,GSBRNA2T00111638001,GSBRNA2T00005823001,GSBRNA2T00092278001,GSBRNA2T00052918001,GSBRNA2T00054047001,GSBRNA2T00091739001,GSBRNA2T00123011001,GSBRNA2T00123113001,GSBRNA2T00120848001,GSBRNA2T00085673001,GSBRNA2T00085669001,GSBRNA2T00085609001…
GO:BP	photosynthesis, light reaction	GO:0019684	1	3.65213e-08	131	5221	7	80927	GSBRNA2T00009877001,GSBRNA2T00076226001,GSBRNA2T00095036001,GSBRNA2T00134966001,GSBRNA2T00109402001,GSBRNA2T00120227001,GSBRNA2T00018440001
GO:BP	ribose phosphate metabolic process	GO:0019693	1	3.65213e-08	428	5221	23	80927	GSBRNA2T00009885001,GSBRNA2T00080785001,GSBRNA2T00080784001,GSBRNA2T00156878001,GSBRNA2T00093561001,GSBRNA2T00031131001,GSBRNA2T00105714001,GSBRNA2T00085766001,GSBRNA2T00028864001,GSBRNA2T00074672001,GSBRNA2T00000119001,GSBRNA2T00146469001,GSBRNA2T00134657001,GSBRNA2T00134656001,GSBRNA2T00007196001,GSBRNA2T00150980001,GSBRNA2T00151907001,GSBRNA2T00119832001,GSBRNA2T00128475001,GSBRNA2T00115611001…
GO:BP	calcium-mediated signaling	GO:0019722	1	3.65213e-08	28	5221	1	80927	GSBRNA2T00071756001
GO:BP	second-messenger-mediated signaling	GO:0019932	1	3.65213e-08	28	5221	1	80927	GSBRNA2T00071756001
GO:BP	modification-dependent protein catabolic process	GO:0019941	1	3.65213e-08	309	5221	17	80927	GSBRNA2T00004540001,GSBRNA2T00037127001,GSBRNA2T00117809001,GSBRNA2T00069044001,GSBRNA2T00095535001,GSBRNA2T00112786001,GSBRNA2T00088793001,GSBRNA2T00078613001,GSBRNA2T00151756001,GSBRNA2T00151755001,GSBRNA2T00116544001,GSBRNA2T00052464001,GSBRNA2T00098540001,GSBRNA2T00096259001,GSBRNA2T00149162001,GSBRNA2T00155576001,GSBRNA2T00018441001
GO:BP	sexual reproduction	GO:0019953	1	3.65213e-08	54	5221	3	80927	GSBRNA2T00095233001,GSBRNA2T00109328001,GSBRNA2T00109534001
GO:BP	membrane docking	GO:0022406	1	3.65213e-08	35	5221	1	80927	GSBRNA2T00151527001
GO:BP	regulation of cellular biosynthetic process	GO:0031326	1	3.65213e-08	3451	5221	195	80927	GSBRNA2T00134310001,GSBRNA2T00081585001,GSBRNA2T00083129001,GSBRNA2T00026805001,GSBRNA2T00026833001,GSBRNA2T00042253001,GSBRNA2T00071333001,GSBRNA2T00044326001,GSBRNA2T00044371001,GSBRNA2T00085609001,GSBRNA2T00149561001,GSBRNA2T00149587001,GSBRNA2T00073188001,GSBRNA2T00130550001,GSBRNA2T00130641001,GSBRNA2T00101575001,GSBRNA2T00129941001,GSBRNA2T00009905001,GSBRNA2T00080795001,GSBRNA2T00080768001…
GO:BP	ribonucleoprotein complex assembly	GO:0022618	1	3.65213e-08	130	5221	6	80927	GSBRNA2T00110169001,GSBRNA2T00121890001,GSBRNA2T00057321001,GSBRNA2T00125208001,GSBRNA2T00155713001,GSBRNA2T00018491001
GO:BP	respiratory electron transport chain	GO:0022904	1	3.65213e-08	45	5221	2	80927	GSBRNA2T00063873001,GSBRNA2T00114725001
GO:BP	signal transduction by protein phosphorylation	GO:0023014	1	3.65213e-08	48	5221	2	80927	GSBRNA2T00069036001,GSBRNA2T00010311001
GO:BP	cell differentiation	GO:0030154	1	3.65213e-08	52	5221	2	80927	GSBRNA2T00114181001,GSBRNA2T00086964001
GO:BP	regulation of proteolysis	GO:0030162	1	3.65213e-08	60	5221	2	80927	GSBRNA2T00000087001,GSBRNA2T00074126001
GO:BP	protein catabolic process	GO:0030163	1	3.65213e-08	426	5221	24	80927	GSBRNA2T00004540001,GSBRNA2T00037127001,GSBRNA2T00005644001,GSBRNA2T00078816001,GSBRNA2T00012561001,GSBRNA2T00117809001,GSBRNA2T00069044001,GSBRNA2T00105377001,GSBRNA2T00116823001,GSBRNA2T00095535001,GSBRNA2T00112786001,GSBRNA2T00134993001,GSBRNA2T00088793001,GSBRNA2T00078613001,GSBRNA2T00045983001,GSBRNA2T00151756001,GSBRNA2T00151755001,GSBRNA2T00116544001,GSBRNA2T00052464001,GSBRNA2T00098540001…
GO:BP	tRNA methylation	GO:0030488	1	3.65213e-08	41	5221	2	80927	GSBRNA2T00037304001,GSBRNA2T00063268001
GO:BP	gene silencing by RNA	GO:0031047	1	3.65213e-08	55	5221	2	80927	GSBRNA2T00078343001,GSBRNA2T00078576001
GO:BP	regulation of cellular metabolic process	GO:0031323	1	3.65213e-08	3743	5221	203	80927	GSBRNA2T00134310001,GSBRNA2T00081585001,GSBRNA2T00083129001,GSBRNA2T00026805001,GSBRNA2T00026833001,GSBRNA2T00042253001,GSBRNA2T00071333001,GSBRNA2T00044326001,GSBRNA2T00044371001,GSBRNA2T00085609001,GSBRNA2T00149561001,GSBRNA2T00149587001,GSBRNA2T00073188001,GSBRNA2T00130550001,GSBRNA2T00130641001,GSBRNA2T00101575001,GSBRNA2T00129941001,GSBRNA2T00009905001,GSBRNA2T00080795001,GSBRNA2T00080768001…
GO:BP	electron transport chain	GO:0022900	1	3.65213e-08	346	5221	15	80927	GSBRNA2T00009892001,GSBRNA2T00021893001,GSBRNA2T00005555001,GSBRNA2T00063873001,GSBRNA2T00040383001,GSBRNA2T00010065001,GSBRNA2T00134832001,GSBRNA2T00134930001,GSBRNA2T00078723001,GSBRNA2T00006409001,GSBRNA2T00078115001,GSBRNA2T00057216001,GSBRNA2T00114725001,GSBRNA2T00019101001,GSBRNA2T00018506001
GO:BP	regulation of RNA biosynthetic process	GO:2001141	1	3.65213e-08	3336	5221	186	80927	GSBRNA2T00134310001,GSBRNA2T00083129001,GSBRNA2T00026805001,GSBRNA2T00026833001,GSBRNA2T00042253001,GSBRNA2T00071333001,GSBRNA2T00044326001,GSBRNA2T00044371001,GSBRNA2T00149561001,GSBRNA2T00149587001,GSBRNA2T00073188001,GSBRNA2T00130550001,GSBRNA2T00130641001,GSBRNA2T00101575001,GSBRNA2T00129941001,GSBRNA2T00009905001,GSBRNA2T00080795001,GSBRNA2T00080768001,GSBRNA2T00080799001,GSBRNA2T00010277001…

## Sheet: BP_downregDEGs_flower
source	term_name	term_id	adjusted_p_value	negative_log10_of_adjusted_p_value	term_size	query_size	intersection_size	effective_domain_size	intersections
GO:BP	biological_process	GO:0008150	5.81099e-32	31.2357	30216	6221	2779	80927	GSBRNA2T00068589001,GSBRNA2T00068601001,GSBRNA2T00068620001,GSBRNA2T00068633001,GSBRNA2T00069363001,GSBRNA2T00134569001,GSBRNA2T00134486001,GSBRNA2T00134349001,GSBRNA2T00134577001,GSBRNA2T00134448001,GSBRNA2T00134216001,GSBRNA2T00134627001,GSBRNA2T00134289001,GSBRNA2T00134290001,GSBRNA2T00134604001,GSBRNA2T00134198001,GSBRNA2T00134148001,GSBRNA2T00134389001,GSBRNA2T00134487001,GSBRNA2T00134638001…
GO:BP	oxidation-reduction process	GO:0055114	2.51696e-18	17.5991	3620	6221	436	80927	GSBRNA2T00134486001,GSBRNA2T00134389001,GSBRNA2T00045443001,GSBRNA2T00021544001,GSBRNA2T00126311001,GSBRNA2T00039051001,GSBRNA2T00092026001,GSBRNA2T00094591001,GSBRNA2T00094621001,GSBRNA2T00012313001,GSBRNA2T00111644001,GSBRNA2T00063985001,GSBRNA2T00090984001,GSBRNA2T00090867001,GSBRNA2T00071362001,GSBRNA2T00146915001,GSBRNA2T00123161001,GSBRNA2T00104806001,GSBRNA2T00104789001,GSBRNA2T00104810001…
GO:BP	transmembrane transport	GO:0055085	1.49514e-14	13.8253	2431	6221	304	80927	GSBRNA2T00068601001,GSBRNA2T00134577001,GSBRNA2T00081619001,GSBRNA2T00021529001,GSBRNA2T00094638001,GSBRNA2T00044756001,GSBRNA2T00112098001,GSBRNA2T00092266001,GSBRNA2T00051749001,GSBRNA2T00071282001,GSBRNA2T00114570001,GSBRNA2T00068824001,GSBRNA2T00064059001,GSBRNA2T00022089001,GSBRNA2T00074072001,GSBRNA2T00130533001,GSBRNA2T00065907001,GSBRNA2T00101556001,GSBRNA2T00111453001,GSBRNA2T00111342001…
GO:BP	response to endogenous stimulus	GO:0009719	5.09132e-14	13.2932	520	6221	98	80927	GSBRNA2T00055319001,GSBRNA2T00104744001,GSBRNA2T00032233001,GSBRNA2T00022089001,GSBRNA2T00064608001,GSBRNA2T00130998001,GSBRNA2T00065923001,GSBRNA2T00065930001,GSBRNA2T00065473001,GSBRNA2T00130208001,GSBRNA2T00130211001,GSBRNA2T00130207001,GSBRNA2T00130210001,GSBRNA2T00130209001,GSBRNA2T00130212001,GSBRNA2T00010287001,GSBRNA2T00010291001,GSBRNA2T00010285001,GSBRNA2T00010292001,GSBRNA2T00010289001…
GO:BP	response to auxin	GO:0009733	5.09132e-14	13.2932	435	6221	87	80927	GSBRNA2T00055319001,GSBRNA2T00104744001,GSBRNA2T00032233001,GSBRNA2T00022089001,GSBRNA2T00130998001,GSBRNA2T00065923001,GSBRNA2T00065930001,GSBRNA2T00065473001,GSBRNA2T00130208001,GSBRNA2T00130211001,GSBRNA2T00130207001,GSBRNA2T00130210001,GSBRNA2T00130209001,GSBRNA2T00130212001,GSBRNA2T00010287001,GSBRNA2T00010291001,GSBRNA2T00010285001,GSBRNA2T00010292001,GSBRNA2T00010289001,GSBRNA2T00010290001…
GO:BP	response to hormone	GO:0009725	8.50502e-14	13.0703	519	6221	97	80927	GSBRNA2T00055319001,GSBRNA2T00104744001,GSBRNA2T00032233001,GSBRNA2T00022089001,GSBRNA2T00130998001,GSBRNA2T00065923001,GSBRNA2T00065930001,GSBRNA2T00065473001,GSBRNA2T00130208001,GSBRNA2T00130211001,GSBRNA2T00130207001,GSBRNA2T00130210001,GSBRNA2T00130209001,GSBRNA2T00130212001,GSBRNA2T00010287001,GSBRNA2T00010291001,GSBRNA2T00010285001,GSBRNA2T00010292001,GSBRNA2T00010289001,GSBRNA2T00010290001…
GO:BP	polysaccharide metabolic process	GO:0005976	2.95825e-13	12.529	638	6221	110	80927	GSBRNA2T00134487001,GSBRNA2T00081631001,GSBRNA2T00112086001,GSBRNA2T00111896001,GSBRNA2T00090956001,GSBRNA2T00015444001,GSBRNA2T00085595001,GSBRNA2T00149628001,GSBRNA2T00064042001,GSBRNA2T00022149001,GSBRNA2T00130296001,GSBRNA2T00130703001,GSBRNA2T00130299001,GSBRNA2T00130300001,GSBRNA2T00101522001,GSBRNA2T00129640001,GSBRNA2T00130020001,GSBRNA2T00009734001,GSBRNA2T00107727001,GSBRNA2T00135556001…
GO:BP	polysaccharide catabolic process	GO:0000272	5.1756e-13	12.286	332	6221	71	80927	GSBRNA2T00134487001,GSBRNA2T00081631001,GSBRNA2T00112086001,GSBRNA2T00111896001,GSBRNA2T00090956001,GSBRNA2T00015444001,GSBRNA2T00064042001,GSBRNA2T00130703001,GSBRNA2T00101522001,GSBRNA2T00129640001,GSBRNA2T00130020001,GSBRNA2T00009734001,GSBRNA2T00135556001,GSBRNA2T00038136001,GSBRNA2T00067730001,GSBRNA2T00132966001,GSBRNA2T00150426001,GSBRNA2T00081694001,GSBRNA2T00045069001,GSBRNA2T00117797001…
GO:BP	response to chemical	GO:0042221	5.25863e-13	12.2791	846	6221	133	80927	GSBRNA2T00090984001,GSBRNA2T00055319001,GSBRNA2T00104744001,GSBRNA2T00032233001,GSBRNA2T00056381001,GSBRNA2T00022089001,GSBRNA2T00064608001,GSBRNA2T00130998001,GSBRNA2T00065923001,GSBRNA2T00065930001,GSBRNA2T00065473001,GSBRNA2T00130208001,GSBRNA2T00130211001,GSBRNA2T00130207001,GSBRNA2T00130210001,GSBRNA2T00130209001,GSBRNA2T00130212001,GSBRNA2T00067483001,GSBRNA2T00084637001,GSBRNA2T00076979001…
GO:BP	response to organic substance	GO:0010033	1.36379e-12	11.8653	554	6221	98	80927	GSBRNA2T00055319001,GSBRNA2T00104744001,GSBRNA2T00032233001,GSBRNA2T00022089001,GSBRNA2T00064608001,GSBRNA2T00130998001,GSBRNA2T00065923001,GSBRNA2T00065930001,GSBRNA2T00065473001,GSBRNA2T00130208001,GSBRNA2T00130211001,GSBRNA2T00130207001,GSBRNA2T00130210001,GSBRNA2T00130209001,GSBRNA2T00130212001,GSBRNA2T00010287001,GSBRNA2T00010291001,GSBRNA2T00010285001,GSBRNA2T00010292001,GSBRNA2T00010289001…
GO:BP	pectin catabolic process	GO:0045490	2.72943e-11	10.5639	255	6221	57	80927	GSBRNA2T00134487001,GSBRNA2T00081631001,GSBRNA2T00112086001,GSBRNA2T00111896001,GSBRNA2T00130703001,GSBRNA2T00101522001,GSBRNA2T00129640001,GSBRNA2T00130020001,GSBRNA2T00009734001,GSBRNA2T00135556001,GSBRNA2T00038136001,GSBRNA2T00067730001,GSBRNA2T00132966001,GSBRNA2T00150426001,GSBRNA2T00081694001,GSBRNA2T00045069001,GSBRNA2T00117797001,GSBRNA2T00101876001,GSBRNA2T00154284001,GSBRNA2T00137501001…
GO:BP	metabolic process	GO:0008152	1.08313e-10	9.96532	22184	6221	1947	80927	GSBRNA2T00068589001,GSBRNA2T00068620001,GSBRNA2T00068633001,GSBRNA2T00069363001,GSBRNA2T00134569001,GSBRNA2T00134486001,GSBRNA2T00134349001,GSBRNA2T00134448001,GSBRNA2T00134216001,GSBRNA2T00134627001,GSBRNA2T00134289001,GSBRNA2T00134148001,GSBRNA2T00134389001,GSBRNA2T00134487001,GSBRNA2T00081631001,GSBRNA2T00047637001,GSBRNA2T00045443001,GSBRNA2T00021544001,GSBRNA2T00021525001,GSBRNA2T00021518001…
GO:BP	xyloglucan metabolic process	GO:0010411	1.20641e-10	9.9185	77	6221	28	80927	GSBRNA2T00149628001,GSBRNA2T00022149001,GSBRNA2T00130296001,GSBRNA2T00130299001,GSBRNA2T00130300001,GSBRNA2T00107727001,GSBRNA2T00000687001,GSBRNA2T00067401001,GSBRNA2T00050163001,GSBRNA2T00099686001,GSBRNA2T00099688001,GSBRNA2T00100224001,GSBRNA2T00001843001,GSBRNA2T00058611001,GSBRNA2T00030898001,GSBRNA2T00015103001,GSBRNA2T00116244001,GSBRNA2T00157553001,GSBRNA2T00039890001,GSBRNA2T00039889001…
GO:BP	transport	GO:0006810	2.93112e-10	9.53297	4315	6221	455	80927	GSBRNA2T00068601001,GSBRNA2T00134577001,GSBRNA2T00081619001,GSBRNA2T00021529001,GSBRNA2T00126288001,GSBRNA2T00094638001,GSBRNA2T00094757001,GSBRNA2T00094750001,GSBRNA2T00044756001,GSBRNA2T00111716001,GSBRNA2T00111558001,GSBRNA2T00112098001,GSBRNA2T00112185001,GSBRNA2T00092266001,GSBRNA2T00092265001,GSBRNA2T00051749001,GSBRNA2T00071282001,GSBRNA2T00114570001,GSBRNA2T00068879001,GSBRNA2T00068824001…
GO:BP	carbohydrate transport	GO:0008643	3.5388e-10	9.45114	55	6221	23	80927	GSBRNA2T00081619001,GSBRNA2T00094750001,GSBRNA2T00056372001,GSBRNA2T00079066001,GSBRNA2T00107013001,GSBRNA2T00080152001,GSBRNA2T00045168001,GSBRNA2T00046083001,GSBRNA2T00102508001,GSBRNA2T00001015001,GSBRNA2T00124790001,GSBRNA2T00082669001,GSBRNA2T00027338001,GSBRNA2T00115350001,GSBRNA2T00049005001,GSBRNA2T00033135001,GSBRNA2T00061853001,GSBRNA2T00099581001,GSBRNA2T00103236001,GSBRNA2T00125365001…
GO:BP	cell wall macromolecule metabolic process	GO:0044036	3.99846e-10	9.39811	167	6221	42	80927	GSBRNA2T00149628001,GSBRNA2T00022149001,GSBRNA2T00130296001,GSBRNA2T00130299001,GSBRNA2T00130300001,GSBRNA2T00107727001,GSBRNA2T00000687001,GSBRNA2T00067401001,GSBRNA2T00000188001,GSBRNA2T00050163001,GSBRNA2T00132371001,GSBRNA2T00099686001,GSBRNA2T00099688001,GSBRNA2T00100224001,GSBRNA2T00085431001,GSBRNA2T00001843001,GSBRNA2T00058611001,GSBRNA2T00074333001,GSBRNA2T00030898001,GSBRNA2T00015103001…
GO:BP	establishment of localization	GO:0051234	3.99846e-10	9.39811	4341	6221	456	80927	GSBRNA2T00068601001,GSBRNA2T00134577001,GSBRNA2T00134638001,GSBRNA2T00081619001,GSBRNA2T00021529001,GSBRNA2T00126288001,GSBRNA2T00094638001,GSBRNA2T00094757001,GSBRNA2T00094750001,GSBRNA2T00044756001,GSBRNA2T00111716001,GSBRNA2T00111558001,GSBRNA2T00112098001,GSBRNA2T00112185001,GSBRNA2T00092266001,GSBRNA2T00092265001,GSBRNA2T00051749001,GSBRNA2T00071282001,GSBRNA2T00114570001,GSBRNA2T00068879001…
GO:BP	localization	GO:0051179	3.99846e-10	9.39811	4376	6221	459	80927	GSBRNA2T00068601001,GSBRNA2T00134577001,GSBRNA2T00134638001,GSBRNA2T00081619001,GSBRNA2T00021529001,GSBRNA2T00126288001,GSBRNA2T00094638001,GSBRNA2T00094757001,GSBRNA2T00094750001,GSBRNA2T00044756001,GSBRNA2T00111716001,GSBRNA2T00111558001,GSBRNA2T00112098001,GSBRNA2T00112185001,GSBRNA2T00092266001,GSBRNA2T00092265001,GSBRNA2T00051749001,GSBRNA2T00071282001,GSBRNA2T00114570001,GSBRNA2T00068879001…
GO:BP	protein phosphorylation	GO:0006468	6.35218e-10	9.19708	2968	6221	330	80927	GSBRNA2T00021525001,GSBRNA2T00094666001,GSBRNA2T00087544001,GSBRNA2T00111887001,GSBRNA2T00112072001,GSBRNA2T00112015001,GSBRNA2T00040632001,GSBRNA2T00092261001,GSBRNA2T00114339001,GSBRNA2T00146835001,GSBRNA2T00085697001,GSBRNA2T00085664001,GSBRNA2T00104824001,GSBRNA2T00032154001,GSBRNA2T00120565001,GSBRNA2T00110152001,GSBRNA2T00110138001,GSBRNA2T00064608001,GSBRNA2T00130390001,GSBRNA2T00130439001…
GO:BP	carbohydrate metabolic process	GO:0005975	6.83922e-10	9.16499	2128	6221	251	80927	GSBRNA2T00134487001,GSBRNA2T00081631001,GSBRNA2T00047637001,GSBRNA2T00126273001,GSBRNA2T00126194001,GSBRNA2T00126366001,GSBRNA2T00087533001,GSBRNA2T00111771001,GSBRNA2T00112086001,GSBRNA2T00111896001,GSBRNA2T00084398001,GSBRNA2T00090956001,GSBRNA2T00015444001,GSBRNA2T00085595001,GSBRNA2T00104725001,GSBRNA2T00120614001,GSBRNA2T00149628001,GSBRNA2T00149616001,GSBRNA2T00041986001,GSBRNA2T00047289001…
GO:BP	cell wall organization or biogenesis	GO:0071554	7.14439e-10	9.14603	784	6221	116	80927	GSBRNA2T00134198001,GSBRNA2T00134487001,GSBRNA2T00111771001,GSBRNA2T00111896001,GSBRNA2T00149628001,GSBRNA2T00022149001,GSBRNA2T00130296001,GSBRNA2T00130703001,GSBRNA2T00130299001,GSBRNA2T00130300001,GSBRNA2T00101522001,GSBRNA2T00129640001,GSBRNA2T00009832001,GSBRNA2T00107727001,GSBRNA2T00000687001,GSBRNA2T00067401001,GSBRNA2T00038136001,GSBRNA2T00121809001,GSBRNA2T00144483001,GSBRNA2T00132966001…
GO:BP	galacturonan metabolic process	GO:0010393	1.15126e-08	7.93883	316	6221	59	80927	GSBRNA2T00134487001,GSBRNA2T00081631001,GSBRNA2T00112086001,GSBRNA2T00111896001,GSBRNA2T00130703001,GSBRNA2T00101522001,GSBRNA2T00129640001,GSBRNA2T00130020001,GSBRNA2T00009734001,GSBRNA2T00135556001,GSBRNA2T00038136001,GSBRNA2T00067730001,GSBRNA2T00132966001,GSBRNA2T00150426001,GSBRNA2T00081694001,GSBRNA2T00045069001,GSBRNA2T00117797001,GSBRNA2T00101876001,GSBRNA2T00154284001,GSBRNA2T00137501001…
GO:BP	pectin metabolic process	GO:0045488	1.15126e-08	7.93883	316	6221	59	80927	GSBRNA2T00134487001,GSBRNA2T00081631001,GSBRNA2T00112086001,GSBRNA2T00111896001,GSBRNA2T00130703001,GSBRNA2T00101522001,GSBRNA2T00129640001,GSBRNA2T00130020001,GSBRNA2T00009734001,GSBRNA2T00135556001,GSBRNA2T00038136001,GSBRNA2T00067730001,GSBRNA2T00132966001,GSBRNA2T00150426001,GSBRNA2T00081694001,GSBRNA2T00045069001,GSBRNA2T00117797001,GSBRNA2T00101876001,GSBRNA2T00154284001,GSBRNA2T00137501001…
GO:BP	negative regulation of catalytic activity	GO:0043086	1.15126e-08	7.93883	245	6221	50	80927	GSBRNA2T00075856001,GSBRNA2T00015833001,GSBRNA2T00077321001,GSBRNA2T00088645001,GSBRNA2T00084598001,GSBRNA2T00076974001,GSBRNA2T00076973001,GSBRNA2T00002426001,GSBRNA2T00156317001,GSBRNA2T00013297001,GSBRNA2T00038181001,GSBRNA2T00038136001,GSBRNA2T00049100001,GSBRNA2T00049102001,GSBRNA2T00113131001,GSBRNA2T00000191001,GSBRNA2T00002062001,GSBRNA2T00063429001,GSBRNA2T00028959001,GSBRNA2T00045069001…
GO:BP	negative regulation of molecular function	GO:0044092	1.15126e-08	7.93883	245	6221	50	80927	GSBRNA2T00075856001,GSBRNA2T00015833001,GSBRNA2T00077321001,GSBRNA2T00088645001,GSBRNA2T00084598001,GSBRNA2T00076974001,GSBRNA2T00076973001,GSBRNA2T00002426001,GSBRNA2T00156317001,GSBRNA2T00013297001,GSBRNA2T00038181001,GSBRNA2T00038136001,GSBRNA2T00049100001,GSBRNA2T00049102001,GSBRNA2T00113131001,GSBRNA2T00000191001,GSBRNA2T00002062001,GSBRNA2T00063429001,GSBRNA2T00028959001,GSBRNA2T00045069001…
GO:BP	regulation of cellular macromolecule biosynthetic process	GO:2000112	2.86607e-08	7.54271	3410	6221	360	80927	GSBRNA2T00069363001,GSBRNA2T00134569001,GSBRNA2T00134448001,GSBRNA2T00134216001,GSBRNA2T00134148001,GSBRNA2T00021518001,GSBRNA2T00021519001,GSBRNA2T00094672001,GSBRNA2T00094695001,GSBRNA2T00094727001,GSBRNA2T00044843001,GSBRNA2T00111646001,GSBRNA2T00042260001,GSBRNA2T00092275001,GSBRNA2T00092264001,GSBRNA2T00052910001,GSBRNA2T00089847001,GSBRNA2T00114310001,GSBRNA2T00055319001,GSBRNA2T00044271001…
GO:BP	regulation of macromolecule biosynthetic process	GO:0010556	3.96785e-08	7.40144	3432	6221	361	80927	GSBRNA2T00069363001,GSBRNA2T00134569001,GSBRNA2T00134448001,GSBRNA2T00134216001,GSBRNA2T00134148001,GSBRNA2T00021518001,GSBRNA2T00021519001,GSBRNA2T00094672001,GSBRNA2T00094695001,GSBRNA2T00094727001,GSBRNA2T00044843001,GSBRNA2T00111646001,GSBRNA2T00042260001,GSBRNA2T00092275001,GSBRNA2T00092264001,GSBRNA2T00052910001,GSBRNA2T00089847001,GSBRNA2T00114310001,GSBRNA2T00055319001,GSBRNA2T00044271001…
GO:BP	response to stimulus	GO:0050896	4.69861e-08	7.32803	3007	6221	322	80927	GSBRNA2T00134604001,GSBRNA2T00081614001,GSBRNA2T00126485001,GSBRNA2T00111932001,GSBRNA2T00077858001,GSBRNA2T00092265001,GSBRNA2T00084357001,GSBRNA2T00090984001,GSBRNA2T00114354001,GSBRNA2T00146682001,GSBRNA2T00055319001,GSBRNA2T00104767001,GSBRNA2T00104744001,GSBRNA2T00032233001,GSBRNA2T00056381001,GSBRNA2T00022089001,GSBRNA2T00064608001,GSBRNA2T00130390001,GSBRNA2T00130998001,GSBRNA2T00130521001…
GO:BP	regulation of biosynthetic process	GO:0009889	4.69861e-08	7.32803	3451	6221	362	80927	GSBRNA2T00069363001,GSBRNA2T00134569001,GSBRNA2T00134448001,GSBRNA2T00134216001,GSBRNA2T00134148001,GSBRNA2T00021518001,GSBRNA2T00021519001,GSBRNA2T00094672001,GSBRNA2T00094695001,GSBRNA2T00094727001,GSBRNA2T00044843001,GSBRNA2T00111646001,GSBRNA2T00042260001,GSBRNA2T00092275001,GSBRNA2T00092264001,GSBRNA2T00052910001,GSBRNA2T00089847001,GSBRNA2T00114310001,GSBRNA2T00055319001,GSBRNA2T00044271001…
GO:BP	regulation of cellular biosynthetic process	GO:0031326	4.69861e-08	7.32803	3451	6221	362	80927	GSBRNA2T00069363001,GSBRNA2T00134569001,GSBRNA2T00134448001,GSBRNA2T00134216001,GSBRNA2T00134148001,GSBRNA2T00021518001,GSBRNA2T00021519001,GSBRNA2T00094672001,GSBRNA2T00094695001,GSBRNA2T00094727001,GSBRNA2T00044843001,GSBRNA2T00111646001,GSBRNA2T00042260001,GSBRNA2T00092275001,GSBRNA2T00092264001,GSBRNA2T00052910001,GSBRNA2T00089847001,GSBRNA2T00114310001,GSBRNA2T00055319001,GSBRNA2T00044271001…
GO:BP	regulation of transcription, DNA-templated	GO:0006355	8.75921e-08	7.05753	3315	6221	348	80927	GSBRNA2T00069363001,GSBRNA2T00134569001,GSBRNA2T00134448001,GSBRNA2T00134216001,GSBRNA2T00134148001,GSBRNA2T00021518001,GSBRNA2T00021519001,GSBRNA2T00094672001,GSBRNA2T00094695001,GSBRNA2T00094727001,GSBRNA2T00044843001,GSBRNA2T00042260001,GSBRNA2T00092275001,GSBRNA2T00092264001,GSBRNA2T00089847001,GSBRNA2T00114310001,GSBRNA2T00055319001,GSBRNA2T00044271001,GSBRNA2T00104909001,GSBRNA2T00032233001…
GO:BP	cell wall modification	GO:0042545	9.79283e-08	7.00909	178	6221	39	80927	GSBRNA2T00134487001,GSBRNA2T00111896001,GSBRNA2T00130703001,GSBRNA2T00101522001,GSBRNA2T00129640001,GSBRNA2T00038136001,GSBRNA2T00132966001,GSBRNA2T00150426001,GSBRNA2T00045069001,GSBRNA2T00101876001,GSBRNA2T00154284001,GSBRNA2T00137501001,GSBRNA2T00116676001,GSBRNA2T00009474001,GSBRNA2T00123903001,GSBRNA2T00006154001,GSBRNA2T00006151001,GSBRNA2T00055435001,GSBRNA2T00081097001,GSBRNA2T00102309001…
GO:BP	cell wall organization	GO:0071555	1.0246e-07	6.98944	666	6221	96	80927	GSBRNA2T00134198001,GSBRNA2T00134487001,GSBRNA2T00111771001,GSBRNA2T00111896001,GSBRNA2T00149628001,GSBRNA2T00130296001,GSBRNA2T00130703001,GSBRNA2T00130299001,GSBRNA2T00130300001,GSBRNA2T00101522001,GSBRNA2T00129640001,GSBRNA2T00009832001,GSBRNA2T00107727001,GSBRNA2T00000687001,GSBRNA2T00067401001,GSBRNA2T00038136001,GSBRNA2T00121809001,GSBRNA2T00144483001,GSBRNA2T00132966001,GSBRNA2T00095197001…
GO:BP	regulation of RNA biosynthetic process	GO:2001141	1.07043e-07	6.97044	3336	6221	349	80927	GSBRNA2T00069363001,GSBRNA2T00134569001,GSBRNA2T00134448001,GSBRNA2T00134216001,GSBRNA2T00134148001,GSBRNA2T00021518001,GSBRNA2T00021519001,GSBRNA2T00094672001,GSBRNA2T00094695001,GSBRNA2T00094727001,GSBRNA2T00044843001,GSBRNA2T00042260001,GSBRNA2T00092275001,GSBRNA2T00092264001,GSBRNA2T00089847001,GSBRNA2T00114310001,GSBRNA2T00055319001,GSBRNA2T00044271001,GSBRNA2T00104909001,GSBRNA2T00032233001…
GO:BP	regulation of nucleic acid-templated transcription	GO:1903506	1.07043e-07	6.97044	3336	6221	349	80927	GSBRNA2T00069363001,GSBRNA2T00134569001,GSBRNA2T00134448001,GSBRNA2T00134216001,GSBRNA2T00134148001,GSBRNA2T00021518001,GSBRNA2T00021519001,GSBRNA2T00094672001,GSBRNA2T00094695001,GSBRNA2T00094727001,GSBRNA2T00044843001,GSBRNA2T00042260001,GSBRNA2T00092275001,GSBRNA2T00092264001,GSBRNA2T00089847001,GSBRNA2T00114310001,GSBRNA2T00055319001,GSBRNA2T00044271001,GSBRNA2T00104909001,GSBRNA2T00032233001…
GO:BP	carbohydrate catabolic process	GO:0016052	1.12523e-07	6.94876	503	6221	78	80927	GSBRNA2T00134487001,GSBRNA2T00081631001,GSBRNA2T00087533001,GSBRNA2T00112086001,GSBRNA2T00111896001,GSBRNA2T00090956001,GSBRNA2T00015444001,GSBRNA2T00064042001,GSBRNA2T00130703001,GSBRNA2T00101522001,GSBRNA2T00129640001,GSBRNA2T00129708001,GSBRNA2T00130020001,GSBRNA2T00009734001,GSBRNA2T00135556001,GSBRNA2T00038136001,GSBRNA2T00067730001,GSBRNA2T00132966001,GSBRNA2T00154580001,GSBRNA2T00150426001…
GO:BP	external encapsulating structure organization	GO:0045229	1.2447e-07	6.90494	670	6221	96	80927	GSBRNA2T00134198001,GSBRNA2T00134487001,GSBRNA2T00111771001,GSBRNA2T00111896001,GSBRNA2T00149628001,GSBRNA2T00130296001,GSBRNA2T00130703001,GSBRNA2T00130299001,GSBRNA2T00130300001,GSBRNA2T00101522001,GSBRNA2T00129640001,GSBRNA2T00009832001,GSBRNA2T00107727001,GSBRNA2T00000687001,GSBRNA2T00067401001,GSBRNA2T00038136001,GSBRNA2T00121809001,GSBRNA2T00144483001,GSBRNA2T00132966001,GSBRNA2T00095197001…
GO:BP	cellular carbohydrate metabolic process	GO:0044262	1.47284e-07	6.83184	453	6221	72	80927	GSBRNA2T00087533001,GSBRNA2T00084398001,GSBRNA2T00090956001,GSBRNA2T00015444001,GSBRNA2T00085595001,GSBRNA2T00149628001,GSBRNA2T00064042001,GSBRNA2T00022149001,GSBRNA2T00072498001,GSBRNA2T00131240001,GSBRNA2T00130296001,GSBRNA2T00130299001,GSBRNA2T00130300001,GSBRNA2T00107727001,GSBRNA2T00000687001,GSBRNA2T00000775001,GSBRNA2T00067401001,GSBRNA2T00095197001,GSBRNA2T00154580001,GSBRNA2T00050163001…
GO:BP	phosphorylation	GO:0016310	1.86607e-07	6.72907	3424	6221	355	80927	GSBRNA2T00021525001,GSBRNA2T00094666001,GSBRNA2T00087544001,GSBRNA2T00087533001,GSBRNA2T00111887001,GSBRNA2T00112072001,GSBRNA2T00112015001,GSBRNA2T00040632001,GSBRNA2T00092261001,GSBRNA2T00114339001,GSBRNA2T00146835001,GSBRNA2T00085697001,GSBRNA2T00085664001,GSBRNA2T00104824001,GSBRNA2T00032154001,GSBRNA2T00120565001,GSBRNA2T00110152001,GSBRNA2T00110138001,GSBRNA2T00064608001,GSBRNA2T00130390001…
GO:BP	regulation of RNA metabolic process	GO:0051252	2.02559e-07	6.69345	3360	6221	349	80927	GSBRNA2T00069363001,GSBRNA2T00134569001,GSBRNA2T00134448001,GSBRNA2T00134216001,GSBRNA2T00134148001,GSBRNA2T00021518001,GSBRNA2T00021519001,GSBRNA2T00094672001,GSBRNA2T00094695001,GSBRNA2T00094727001,GSBRNA2T00044843001,GSBRNA2T00042260001,GSBRNA2T00092275001,GSBRNA2T00092264001,GSBRNA2T00089847001,GSBRNA2T00114310001,GSBRNA2T00055319001,GSBRNA2T00044271001,GSBRNA2T00104909001,GSBRNA2T00032233001…
GO:BP	biological regulation	GO:0065007	2.69599e-07	6.56928	6286	6221	602	80927	GSBRNA2T00068601001,GSBRNA2T00069363001,GSBRNA2T00134569001,GSBRNA2T00134448001,GSBRNA2T00134216001,GSBRNA2T00134290001,GSBRNA2T00134604001,GSBRNA2T00134148001,GSBRNA2T00021518001,GSBRNA2T00021519001,GSBRNA2T00094704001,GSBRNA2T00094672001,GSBRNA2T00094695001,GSBRNA2T00094727001,GSBRNA2T00094666001,GSBRNA2T00094621001,GSBRNA2T00094590001,GSBRNA2T00044843001,GSBRNA2T00111646001,GSBRNA2T00111987001…
GO:BP	hemicellulose metabolic process	GO:0010410	2.87347e-07	6.54159	115	6221	29	80927	GSBRNA2T00149628001,GSBRNA2T00022149001,GSBRNA2T00130296001,GSBRNA2T00130299001,GSBRNA2T00130300001,GSBRNA2T00107727001,GSBRNA2T00000687001,GSBRNA2T00067401001,GSBRNA2T00050163001,GSBRNA2T00099686001,GSBRNA2T00099688001,GSBRNA2T00100224001,GSBRNA2T00001843001,GSBRNA2T00058611001,GSBRNA2T00030898001,GSBRNA2T00015103001,GSBRNA2T00116244001,GSBRNA2T00102482001,GSBRNA2T00157553001,GSBRNA2T00039890001…
GO:BP	regulation of nucleobase-containing compound metabolic process	GO:0019219	2.87347e-07	6.54159	3373	6221	349	80927	GSBRNA2T00069363001,GSBRNA2T00134569001,GSBRNA2T00134448001,GSBRNA2T00134216001,GSBRNA2T00134148001,GSBRNA2T00021518001,GSBRNA2T00021519001,GSBRNA2T00094672001,GSBRNA2T00094695001,GSBRNA2T00094727001,GSBRNA2T00044843001,GSBRNA2T00042260001,GSBRNA2T00092275001,GSBRNA2T00092264001,GSBRNA2T00089847001,GSBRNA2T00114310001,GSBRNA2T00055319001,GSBRNA2T00044271001,GSBRNA2T00104909001,GSBRNA2T00032233001…
GO:BP	cell wall polysaccharide metabolic process	GO:0010383	3.46956e-07	6.45973	116	6221	29	80927	GSBRNA2T00149628001,GSBRNA2T00022149001,GSBRNA2T00130296001,GSBRNA2T00130299001,GSBRNA2T00130300001,GSBRNA2T00107727001,GSBRNA2T00000687001,GSBRNA2T00067401001,GSBRNA2T00050163001,GSBRNA2T00099686001,GSBRNA2T00099688001,GSBRNA2T00100224001,GSBRNA2T00001843001,GSBRNA2T00058611001,GSBRNA2T00030898001,GSBRNA2T00015103001,GSBRNA2T00116244001,GSBRNA2T00102482001,GSBRNA2T00157553001,GSBRNA2T00039890001…
GO:BP	regulation of cellular metabolic process	GO:0031323	9.39204e-07	6.02724	3743	6221	378	80927	GSBRNA2T00069363001,GSBRNA2T00134569001,GSBRNA2T00134448001,GSBRNA2T00134216001,GSBRNA2T00134148001,GSBRNA2T00021518001,GSBRNA2T00021519001,GSBRNA2T00094672001,GSBRNA2T00094695001,GSBRNA2T00094727001,GSBRNA2T00094666001,GSBRNA2T00094590001,GSBRNA2T00044843001,GSBRNA2T00111646001,GSBRNA2T00042260001,GSBRNA2T00092275001,GSBRNA2T00092264001,GSBRNA2T00052910001,GSBRNA2T00089847001,GSBRNA2T00114310001…
GO:BP	defense response	GO:0006952	2.03709e-06	5.69099	350	6221	57	80927	GSBRNA2T00126485001,GSBRNA2T00111932001,GSBRNA2T00077858001,GSBRNA2T00104767001,GSBRNA2T00064608001,GSBRNA2T00136216001,GSBRNA2T00067206001,GSBRNA2T00073067001,GSBRNA2T00009711001,GSBRNA2T00131302001,GSBRNA2T00045115001,GSBRNA2T00154226001,GSBRNA2T00070570001,GSBRNA2T00116787001,GSBRNA2T00001885001,GSBRNA2T00155325001,GSBRNA2T00095570001,GSBRNA2T00146665001,GSBRNA2T00146667001,GSBRNA2T00153440001…
GO:BP	reactive oxygen species metabolic process	GO:0072593	2.52704e-06	5.59739	242	6221	44	80927	GSBRNA2T00068633001,GSBRNA2T00056381001,GSBRNA2T00130723001,GSBRNA2T00084637001,GSBRNA2T00076979001,GSBRNA2T00136178001,GSBRNA2T00135615001,GSBRNA2T00136273001,GSBRNA2T00086080001,GSBRNA2T00131836001,GSBRNA2T00131777001,GSBRNA2T00081296001,GSBRNA2T00126684001,GSBRNA2T00154487001,GSBRNA2T00118907001,GSBRNA2T00063439001,GSBRNA2T00107065001,GSBRNA2T00132529001,GSBRNA2T00151069001,GSBRNA2T00099669001…
GO:BP	regulation of nitrogen compound metabolic process	GO:0051171	3.47742e-06	5.45874	3655	6221	366	80927	GSBRNA2T00069363001,GSBRNA2T00134569001,GSBRNA2T00134448001,GSBRNA2T00134216001,GSBRNA2T00134148001,GSBRNA2T00021518001,GSBRNA2T00021519001,GSBRNA2T00094672001,GSBRNA2T00094695001,GSBRNA2T00094727001,GSBRNA2T00094666001,GSBRNA2T00094590001,GSBRNA2T00044843001,GSBRNA2T00042260001,GSBRNA2T00092275001,GSBRNA2T00092264001,GSBRNA2T00089847001,GSBRNA2T00114310001,GSBRNA2T00055319001,GSBRNA2T00044271001…
GO:BP	xenobiotic transport	GO:0042908	3.63013e-06	5.44008	94	6221	24	80927	GSBRNA2T00074072001,GSBRNA2T00111342001,GSBRNA2T00072678001,GSBRNA2T00000741001,GSBRNA2T00000751001,GSBRNA2T00085231001,GSBRNA2T00094805001,GSBRNA2T00036883001,GSBRNA2T00060163001,GSBRNA2T00070588001,GSBRNA2T00094995001,GSBRNA2T00057092001,GSBRNA2T00018547001,GSBRNA2T00066430001,GSBRNA2T00009117001,GSBRNA2T00006638001,GSBRNA2T00097210001,GSBRNA2T00057391001,GSBRNA2T00043379001,GSBRNA2T00029429001…
GO:BP	regulation of primary metabolic process	GO:0080090	3.99511e-06	5.39847	3673	6221	367	80927	GSBRNA2T00069363001,GSBRNA2T00134569001,GSBRNA2T00134448001,GSBRNA2T00134216001,GSBRNA2T00134148001,GSBRNA2T00021518001,GSBRNA2T00021519001,GSBRNA2T00094672001,GSBRNA2T00094695001,GSBRNA2T00094727001,GSBRNA2T00094666001,GSBRNA2T00094590001,GSBRNA2T00044843001,GSBRNA2T00042260001,GSBRNA2T00092275001,GSBRNA2T00092264001,GSBRNA2T00089847001,GSBRNA2T00114310001,GSBRNA2T00055319001,GSBRNA2T00044271001…
GO:BP	clathrin coat assembly	GO:0048268	4.32836e-06	5.36368	46	6221	16	80927	GSBRNA2T00117336001,GSBRNA2T00150400001,GSBRNA2T00081724001,GSBRNA2T00049613001,GSBRNA2T00127252001,GSBRNA2T00002667001,GSBRNA2T00018226001,GSBRNA2T00135080001,GSBRNA2T00113071001,GSBRNA2T00089704001,GSBRNA2T00089615001,GSBRNA2T00072429001,GSBRNA2T00070219001,GSBRNA2T00052472001,GSBRNA2T00102084001,GSBRNA2T00145240001
GO:BP	cell wall biogenesis	GO:0042546	6.64099e-06	5.17777	178	6221	35	80927	GSBRNA2T00149628001,GSBRNA2T00130296001,GSBRNA2T00130299001,GSBRNA2T00130300001,GSBRNA2T00107727001,GSBRNA2T00000687001,GSBRNA2T00067401001,GSBRNA2T00144483001,GSBRNA2T00050163001,GSBRNA2T00047138001,GSBRNA2T00099686001,GSBRNA2T00099688001,GSBRNA2T00100224001,GSBRNA2T00137338001,GSBRNA2T00001843001,GSBRNA2T00058611001,GSBRNA2T00030898001,GSBRNA2T00015103001,GSBRNA2T00057566001,GSBRNA2T00116244001…
GO:BP	glucan metabolic process	GO:0044042	1.01559e-05	4.99328	255	6221	44	80927	GSBRNA2T00090956001,GSBRNA2T00015444001,GSBRNA2T00085595001,GSBRNA2T00149628001,GSBRNA2T00064042001,GSBRNA2T00022149001,GSBRNA2T00130296001,GSBRNA2T00130299001,GSBRNA2T00130300001,GSBRNA2T00107727001,GSBRNA2T00000687001,GSBRNA2T00067401001,GSBRNA2T00095197001,GSBRNA2T00050163001,GSBRNA2T00099686001,GSBRNA2T00099688001,GSBRNA2T00100224001,GSBRNA2T00001843001,GSBRNA2T00058611001,GSBRNA2T00030898001…
GO:BP	cellular glucan metabolic process	GO:0006073	1.01559e-05	4.99328	255	6221	44	80927	GSBRNA2T00090956001,GSBRNA2T00015444001,GSBRNA2T00085595001,GSBRNA2T00149628001,GSBRNA2T00064042001,GSBRNA2T00022149001,GSBRNA2T00130296001,GSBRNA2T00130299001,GSBRNA2T00130300001,GSBRNA2T00107727001,GSBRNA2T00000687001,GSBRNA2T00067401001,GSBRNA2T00095197001,GSBRNA2T00050163001,GSBRNA2T00099686001,GSBRNA2T00099688001,GSBRNA2T00100224001,GSBRNA2T00001843001,GSBRNA2T00058611001,GSBRNA2T00030898001…
GO:BP	positive regulation of developmental growth	GO:0048639	1.13622e-05	4.94454	12	6221	8	80927	GSBRNA2T00132612001,GSBRNA2T00045158001,GSBRNA2T00002231001,GSBRNA2T00139019001,GSBRNA2T00105982001,GSBRNA2T00099013001,GSBRNA2T00123240001,GSBRNA2T00022025001
GO:BP	positive regulation of organ growth	GO:0046622	1.13622e-05	4.94454	12	6221	8	80927	GSBRNA2T00132612001,GSBRNA2T00045158001,GSBRNA2T00002231001,GSBRNA2T00139019001,GSBRNA2T00105982001,GSBRNA2T00099013001,GSBRNA2T00123240001,GSBRNA2T00022025001
GO:BP	positive regulation of growth	GO:0045927	1.13622e-05	4.94454	12	6221	8	80927	GSBRNA2T00132612001,GSBRNA2T00045158001,GSBRNA2T00002231001,GSBRNA2T00139019001,GSBRNA2T00105982001,GSBRNA2T00099013001,GSBRNA2T00123240001,GSBRNA2T00022025001
GO:BP	catabolic process	GO:0009056	1.43308e-05	4.84373	1625	6221	180	80927	GSBRNA2T00134487001,GSBRNA2T00081631001,GSBRNA2T00094590001,GSBRNA2T00044850001,GSBRNA2T00044848001,GSBRNA2T00087533001,GSBRNA2T00112086001,GSBRNA2T00111896001,GSBRNA2T00111987001,GSBRNA2T00090956001,GSBRNA2T00146827001,GSBRNA2T00015444001,GSBRNA2T00104767001,GSBRNA2T00064042001,GSBRNA2T00130859001,GSBRNA2T00130703001,GSBRNA2T00130723001,GSBRNA2T00130425001,GSBRNA2T00101522001,GSBRNA2T00129640001…
GO:BP	oligosaccharide transport	GO:0015772	1.4818e-05	4.82921	20	6221	10	80927	GSBRNA2T00081619001,GSBRNA2T00107013001,GSBRNA2T00102508001,GSBRNA2T00115350001,GSBRNA2T00033135001,GSBRNA2T00061853001,GSBRNA2T00099581001,GSBRNA2T00103236001,GSBRNA2T00119488001,GSBRNA2T00015756001
GO:BP	disaccharide transport	GO:0015766	1.4818e-05	4.82921	20	6221	10	80927	GSBRNA2T00081619001,GSBRNA2T00107013001,GSBRNA2T00102508001,GSBRNA2T00115350001,GSBRNA2T00033135001,GSBRNA2T00061853001,GSBRNA2T00099581001,GSBRNA2T00103236001,GSBRNA2T00119488001,GSBRNA2T00015756001
GO:BP	sucrose transport	GO:0015770	1.4818e-05	4.82921	20	6221	10	80927	GSBRNA2T00081619001,GSBRNA2T00107013001,GSBRNA2T00102508001,GSBRNA2T00115350001,GSBRNA2T00033135001,GSBRNA2T00061853001,GSBRNA2T00099581001,GSBRNA2T00103236001,GSBRNA2T00119488001,GSBRNA2T00015756001
GO:BP	hydrogen peroxide catabolic process	GO:0042744	1.4818e-05	4.82921	193	6221	36	80927	GSBRNA2T00130723001,GSBRNA2T00084637001,GSBRNA2T00076979001,GSBRNA2T00136178001,GSBRNA2T00135615001,GSBRNA2T00136273001,GSBRNA2T00086080001,GSBRNA2T00131777001,GSBRNA2T00081296001,GSBRNA2T00126684001,GSBRNA2T00118907001,GSBRNA2T00063439001,GSBRNA2T00107065001,GSBRNA2T00132529001,GSBRNA2T00151069001,GSBRNA2T00099669001,GSBRNA2T00054757001,GSBRNA2T00135276001,GSBRNA2T00114998001,GSBRNA2T00126038001…
GO:BP	hydrogen peroxide metabolic process	GO:0042743	1.62237e-05	4.78985	194	6221	36	80927	GSBRNA2T00130723001,GSBRNA2T00084637001,GSBRNA2T00076979001,GSBRNA2T00136178001,GSBRNA2T00135615001,GSBRNA2T00136273001,GSBRNA2T00086080001,GSBRNA2T00131777001,GSBRNA2T00081296001,GSBRNA2T00126684001,GSBRNA2T00118907001,GSBRNA2T00063439001,GSBRNA2T00107065001,GSBRNA2T00132529001,GSBRNA2T00151069001,GSBRNA2T00099669001,GSBRNA2T00054757001,GSBRNA2T00135276001,GSBRNA2T00114998001,GSBRNA2T00126038001…
GO:BP	regulation of gene expression	GO:0010468	1.7214e-05	4.76412	3634	6221	358	80927	GSBRNA2T00069363001,GSBRNA2T00134569001,GSBRNA2T00134448001,GSBRNA2T00134216001,GSBRNA2T00134148001,GSBRNA2T00021518001,GSBRNA2T00021519001,GSBRNA2T00094704001,GSBRNA2T00094672001,GSBRNA2T00094695001,GSBRNA2T00094727001,GSBRNA2T00044843001,GSBRNA2T00111987001,GSBRNA2T00042260001,GSBRNA2T00092275001,GSBRNA2T00092264001,GSBRNA2T00089847001,GSBRNA2T00114310001,GSBRNA2T00055319001,GSBRNA2T00044271001…
GO:BP	regulation of macromolecule metabolic process	GO:0060255	2.28003e-05	4.64206	3970	6221	386	80927	GSBRNA2T00069363001,GSBRNA2T00134569001,GSBRNA2T00134448001,GSBRNA2T00134216001,GSBRNA2T00134148001,GSBRNA2T00021518001,GSBRNA2T00021519001,GSBRNA2T00094704001,GSBRNA2T00094672001,GSBRNA2T00094695001,GSBRNA2T00094727001,GSBRNA2T00094666001,GSBRNA2T00094590001,GSBRNA2T00044843001,GSBRNA2T00111646001,GSBRNA2T00111987001,GSBRNA2T00042260001,GSBRNA2T00092275001,GSBRNA2T00092264001,GSBRNA2T00052910001…
GO:BP	response to oxidative stress	GO:0006979	2.80404e-05	4.55222	328	6221	51	80927	GSBRNA2T00056381001,GSBRNA2T00130723001,GSBRNA2T00081432001,GSBRNA2T00084637001,GSBRNA2T00076979001,GSBRNA2T00136178001,GSBRNA2T00135615001,GSBRNA2T00136273001,GSBRNA2T00086080001,GSBRNA2T00131777001,GSBRNA2T00081296001,GSBRNA2T00126684001,GSBRNA2T00118907001,GSBRNA2T00063439001,GSBRNA2T00107065001,GSBRNA2T00132529001,GSBRNA2T00151069001,GSBRNA2T00099822001,GSBRNA2T00099669001,GSBRNA2T00099848001…
GO:BP	regulation of metabolic process	GO:0019222	5.62917e-05	4.24956	4021	6221	387	80927	GSBRNA2T00069363001,GSBRNA2T00134569001,GSBRNA2T00134448001,GSBRNA2T00134216001,GSBRNA2T00134148001,GSBRNA2T00021518001,GSBRNA2T00021519001,GSBRNA2T00094704001,GSBRNA2T00094672001,GSBRNA2T00094695001,GSBRNA2T00094727001,GSBRNA2T00094666001,GSBRNA2T00094590001,GSBRNA2T00044843001,GSBRNA2T00111646001,GSBRNA2T00111987001,GSBRNA2T00042260001,GSBRNA2T00092275001,GSBRNA2T00092264001,GSBRNA2T00052910001…
GO:BP	disaccharide metabolic process	GO:0005984	9.11587e-05	4.0402	91	6221	21	80927	GSBRNA2T00084398001,GSBRNA2T00072498001,GSBRNA2T00000775001,GSBRNA2T00148916001,GSBRNA2T00154198001,GSBRNA2T00146462001,GSBRNA2T00081377001,GSBRNA2T00116170001,GSBRNA2T00157325001,GSBRNA2T00020794001,GSBRNA2T00044972001,GSBRNA2T00140183001,GSBRNA2T00140859001,GSBRNA2T00047446001,GSBRNA2T00079269001,GSBRNA2T00094365001,GSBRNA2T00153227001,GSBRNA2T00036513001,GSBRNA2T00069645001,GSBRNA2T00147956001…
GO:BP	metal ion transport	GO:0030001	9.84981e-05	4.00657	533	6221	71	80927	GSBRNA2T00126288001,GSBRNA2T00094757001,GSBRNA2T00044756001,GSBRNA2T00130533001,GSBRNA2T00130892001,GSBRNA2T00065867001,GSBRNA2T00136463001,GSBRNA2T00136268001,GSBRNA2T00086067001,GSBRNA2T00000160001,GSBRNA2T00106939001,GSBRNA2T00131470001,GSBRNA2T00086311001,GSBRNA2T00113362001,GSBRNA2T00053943001,GSBRNA2T00148739001,GSBRNA2T00137304001,GSBRNA2T00003630001,GSBRNA2T00017889001,GSBRNA2T00071749001…
GO:BP	regulation of cellular process	GO:0050794	9.96324e-05	4.0016	5371	6221	499	80927	GSBRNA2T00069363001,GSBRNA2T00134569001,GSBRNA2T00134448001,GSBRNA2T00134216001,GSBRNA2T00134604001,GSBRNA2T00134148001,GSBRNA2T00021518001,GSBRNA2T00021519001,GSBRNA2T00094672001,GSBRNA2T00094695001,GSBRNA2T00094727001,GSBRNA2T00094666001,GSBRNA2T00094621001,GSBRNA2T00094590001,GSBRNA2T00044843001,GSBRNA2T00111646001,GSBRNA2T00042260001,GSBRNA2T00092275001,GSBRNA2T00092264001,GSBRNA2T00092265001…
GO:BP	positive regulation of developmental process	GO:0051094	0.000101648	3.9929	24	6221	10	80927	GSBRNA2T00132612001,GSBRNA2T00056021001,GSBRNA2T00045158001,GSBRNA2T00002231001,GSBRNA2T00088592001,GSBRNA2T00139019001,GSBRNA2T00105982001,GSBRNA2T00099013001,GSBRNA2T00123240001,GSBRNA2T00022025001
GO:BP	positive regulation of multicellular organismal process	GO:0051240	0.000101648	3.9929	24	6221	10	80927	GSBRNA2T00132612001,GSBRNA2T00056021001,GSBRNA2T00045158001,GSBRNA2T00002231001,GSBRNA2T00088592001,GSBRNA2T00139019001,GSBRNA2T00105982001,GSBRNA2T00099013001,GSBRNA2T00123240001,GSBRNA2T00022025001
GO:BP	oligopeptide transport	GO:0006857	0.000107396	3.96901	52	6221	15	80927	GSBRNA2T00079202001,GSBRNA2T00073084001,GSBRNA2T00046218001,GSBRNA2T00116930001,GSBRNA2T00047387001,GSBRNA2T00152698001,GSBRNA2T00124891001,GSBRNA2T00090351001,GSBRNA2T00044594001,GSBRNA2T00148400001,GSBRNA2T00153156001,GSBRNA2T00033123001,GSBRNA2T00059933001,GSBRNA2T00081637001,GSBRNA2T00035397001
GO:BP	ion transport	GO:0006811	0.000121794	3.91437	1296	6221	144	80927	GSBRNA2T00068601001,GSBRNA2T00126288001,GSBRNA2T00094757001,GSBRNA2T00044756001,GSBRNA2T00112185001,GSBRNA2T00068879001,GSBRNA2T00108427001,GSBRNA2T00130533001,GSBRNA2T00130892001,GSBRNA2T00065867001,GSBRNA2T00122225001,GSBRNA2T00122226001,GSBRNA2T00136463001,GSBRNA2T00136268001,GSBRNA2T00086067001,GSBRNA2T00156267001,GSBRNA2T00055921001,GSBRNA2T00132977001,GSBRNA2T00000160001,GSBRNA2T00106939001…
GO:BP	organic acid catabolic process	GO:0016054	0.000145359	3.83756	87	6221	20	80927	GSBRNA2T00087533001,GSBRNA2T00130859001,GSBRNA2T00009793001,GSBRNA2T00136166001,GSBRNA2T00058014001,GSBRNA2T00058154001,GSBRNA2T00041448001,GSBRNA2T00099968001,GSBRNA2T00116787001,GSBRNA2T00043992001,GSBRNA2T00142964001,GSBRNA2T00110925001,GSBRNA2T00005466001,GSBRNA2T00104634001,GSBRNA2T00073644001,GSBRNA2T00078952001,GSBRNA2T00123365001,GSBRNA2T00028728001,GSBRNA2T00121349001,GSBRNA2T00121350001
GO:BP	carboxylic acid catabolic process	GO:0046395	0.000145359	3.83756	87	6221	20	80927	GSBRNA2T00087533001,GSBRNA2T00130859001,GSBRNA2T00009793001,GSBRNA2T00136166001,GSBRNA2T00058014001,GSBRNA2T00058154001,GSBRNA2T00041448001,GSBRNA2T00099968001,GSBRNA2T00116787001,GSBRNA2T00043992001,GSBRNA2T00142964001,GSBRNA2T00110925001,GSBRNA2T00005466001,GSBRNA2T00104634001,GSBRNA2T00073644001,GSBRNA2T00078952001,GSBRNA2T00123365001,GSBRNA2T00028728001,GSBRNA2T00121349001,GSBRNA2T00121350001
GO:BP	cellular polysaccharide metabolic process	GO:0044264	0.000147382	3.83156	294	6221	45	80927	GSBRNA2T00090956001,GSBRNA2T00015444001,GSBRNA2T00085595001,GSBRNA2T00149628001,GSBRNA2T00064042001,GSBRNA2T00022149001,GSBRNA2T00130296001,GSBRNA2T00130299001,GSBRNA2T00130300001,GSBRNA2T00107727001,GSBRNA2T00000687001,GSBRNA2T00067401001,GSBRNA2T00095197001,GSBRNA2T00050163001,GSBRNA2T00099686001,GSBRNA2T00099688001,GSBRNA2T00100224001,GSBRNA2T00001843001,GSBRNA2T00058611001,GSBRNA2T00030898001…
GO:BP	transcription, DNA-templated	GO:0006351	0.000170842	3.76741	3667	6221	352	80927	GSBRNA2T00069363001,GSBRNA2T00134569001,GSBRNA2T00134448001,GSBRNA2T00134216001,GSBRNA2T00134148001,GSBRNA2T00021518001,GSBRNA2T00021519001,GSBRNA2T00094672001,GSBRNA2T00094695001,GSBRNA2T00094727001,GSBRNA2T00044843001,GSBRNA2T00042260001,GSBRNA2T00092275001,GSBRNA2T00092264001,GSBRNA2T00089847001,GSBRNA2T00114310001,GSBRNA2T00055319001,GSBRNA2T00044271001,GSBRNA2T00104909001,GSBRNA2T00032233001…
GO:BP	response to external stimulus	GO:0009605	0.000188558	3.72456	288	6221	44	80927	GSBRNA2T00081614001,GSBRNA2T00126485001,GSBRNA2T00111932001,GSBRNA2T00104767001,GSBRNA2T00064608001,GSBRNA2T00129965001,GSBRNA2T00136216001,GSBRNA2T00009711001,GSBRNA2T00090199001,GSBRNA2T00131302001,GSBRNA2T00092332001,GSBRNA2T00088760001,GSBRNA2T00155325001,GSBRNA2T00089292001,GSBRNA2T00103031001,GSBRNA2T00102911001,GSBRNA2T00030882001,GSBRNA2T00024508001,GSBRNA2T00146665001,GSBRNA2T00153440001…
GO:BP	nucleic acid-templated transcription	GO:0097659	0.000198054	3.70322	3698	6221	354	80927	GSBRNA2T00069363001,GSBRNA2T00134569001,GSBRNA2T00134448001,GSBRNA2T00134216001,GSBRNA2T00134148001,GSBRNA2T00021518001,GSBRNA2T00021519001,GSBRNA2T00094672001,GSBRNA2T00094695001,GSBRNA2T00094727001,GSBRNA2T00044843001,GSBRNA2T00042260001,GSBRNA2T00092275001,GSBRNA2T00092264001,GSBRNA2T00089847001,GSBRNA2T00114310001,GSBRNA2T00055319001,GSBRNA2T00044271001,GSBRNA2T00104909001,GSBRNA2T00032233001…
GO:BP	response to blue light	GO:0009637	0.000212053	3.67356	26	6221	10	80927	GSBRNA2T00081614001,GSBRNA2T00021785001,GSBRNA2T00092332001,GSBRNA2T00101071001,GSBRNA2T00102911001,GSBRNA2T00024508001,GSBRNA2T00129416001,GSBRNA2T00115341001,GSBRNA2T00109174001,GSBRNA2T00139565001
GO:BP	RNA biosynthetic process	GO:0032774	0.000221156	3.6553	3704	6221	354	80927	GSBRNA2T00069363001,GSBRNA2T00134569001,GSBRNA2T00134448001,GSBRNA2T00134216001,GSBRNA2T00134148001,GSBRNA2T00021518001,GSBRNA2T00021519001,GSBRNA2T00094672001,GSBRNA2T00094695001,GSBRNA2T00094727001,GSBRNA2T00044843001,GSBRNA2T00042260001,GSBRNA2T00092275001,GSBRNA2T00092264001,GSBRNA2T00089847001,GSBRNA2T00114310001,GSBRNA2T00055319001,GSBRNA2T00044271001,GSBRNA2T00104909001,GSBRNA2T00032233001…
GO:BP	anion transport	GO:0006820	0.000254904	3.59362	292	6221	44	80927	GSBRNA2T00068601001,GSBRNA2T00112185001,GSBRNA2T00068879001,GSBRNA2T00108427001,GSBRNA2T00055921001,GSBRNA2T00132977001,GSBRNA2T00066300001,GSBRNA2T00078774001,GSBRNA2T00047235001,GSBRNA2T00132254001,GSBRNA2T00099855001,GSBRNA2T00041791001,GSBRNA2T00074270001,GSBRNA2T00116869001,GSBRNA2T00116867001,GSBRNA2T00123837001,GSBRNA2T00155254001,GSBRNA2T00129330001,GSBRNA2T00146264001,GSBRNA2T00146474001…
GO:BP	regulation of organ growth	GO:0046620	0.000263323	3.57951	17	6221	8	80927	GSBRNA2T00132612001,GSBRNA2T00045158001,GSBRNA2T00002231001,GSBRNA2T00139019001,GSBRNA2T00105982001,GSBRNA2T00099013001,GSBRNA2T00123240001,GSBRNA2T00022025001
GO:BP	organ growth	GO:0035265	0.000263323	3.57951	17	6221	8	80927	GSBRNA2T00132612001,GSBRNA2T00045158001,GSBRNA2T00002231001,GSBRNA2T00139019001,GSBRNA2T00105982001,GSBRNA2T00099013001,GSBRNA2T00123240001,GSBRNA2T00022025001
GO:BP	phosphate-containing compound metabolic process	GO:0006796	0.000269955	3.56871	4707	6221	438	80927	GSBRNA2T00134349001,GSBRNA2T00021525001,GSBRNA2T00094666001,GSBRNA2T00087544001,GSBRNA2T00087514001,GSBRNA2T00087533001,GSBRNA2T00111887001,GSBRNA2T00112072001,GSBRNA2T00112015001,GSBRNA2T00040632001,GSBRNA2T00092261001,GSBRNA2T00084398001,GSBRNA2T00054055001,GSBRNA2T00114339001,GSBRNA2T00114346001,GSBRNA2T00146835001,GSBRNA2T00085697001,GSBRNA2T00085664001,GSBRNA2T00104824001,GSBRNA2T00032154001…
GO:BP	immune response	GO:0006955	0.000275332	3.56014	77	6221	18	80927	GSBRNA2T00126485001,GSBRNA2T00064608001,GSBRNA2T00136216001,GSBRNA2T00009711001,GSBRNA2T00155325001,GSBRNA2T00153440001,GSBRNA2T00074055001,GSBRNA2T00062568001,GSBRNA2T00139219001,GSBRNA2T00060850001,GSBRNA2T00090460001,GSBRNA2T00072247001,GSBRNA2T00078004001,GSBRNA2T00047461001,GSBRNA2T00047460001,GSBRNA2T00122713001,GSBRNA2T00071025001,GSBRNA2T00055852001
GO:BP	innate immune response	GO:0045087	0.000275332	3.56014	77	6221	18	80927	GSBRNA2T00126485001,GSBRNA2T00064608001,GSBRNA2T00136216001,GSBRNA2T00009711001,GSBRNA2T00155325001,GSBRNA2T00153440001,GSBRNA2T00074055001,GSBRNA2T00062568001,GSBRNA2T00139219001,GSBRNA2T00060850001,GSBRNA2T00090460001,GSBRNA2T00072247001,GSBRNA2T00078004001,GSBRNA2T00047461001,GSBRNA2T00047460001,GSBRNA2T00122713001,GSBRNA2T00071025001,GSBRNA2T00055852001
GO:BP	regulation of biological process	GO:0050789	0.000294587	3.53079	5777	6221	527	80927	GSBRNA2T00069363001,GSBRNA2T00134569001,GSBRNA2T00134448001,GSBRNA2T00134216001,GSBRNA2T00134290001,GSBRNA2T00134604001,GSBRNA2T00134148001,GSBRNA2T00021518001,GSBRNA2T00021519001,GSBRNA2T00094704001,GSBRNA2T00094672001,GSBRNA2T00094695001,GSBRNA2T00094727001,GSBRNA2T00094666001,GSBRNA2T00094621001,GSBRNA2T00094590001,GSBRNA2T00044843001,GSBRNA2T00111646001,GSBRNA2T00111987001,GSBRNA2T00042260001…
GO:BP	immune system process	GO:0002376	0.000324948	3.48819	78	6221	18	80927	GSBRNA2T00126485001,GSBRNA2T00064608001,GSBRNA2T00136216001,GSBRNA2T00009711001,GSBRNA2T00155325001,GSBRNA2T00153440001,GSBRNA2T00074055001,GSBRNA2T00062568001,GSBRNA2T00139219001,GSBRNA2T00060850001,GSBRNA2T00090460001,GSBRNA2T00072247001,GSBRNA2T00078004001,GSBRNA2T00047461001,GSBRNA2T00047460001,GSBRNA2T00122713001,GSBRNA2T00071025001,GSBRNA2T00055852001
GO:BP	phosphorus metabolic process	GO:0006793	0.000341761	3.46628	4722	6221	438	80927	GSBRNA2T00134349001,GSBRNA2T00021525001,GSBRNA2T00094666001,GSBRNA2T00087544001,GSBRNA2T00087514001,GSBRNA2T00087533001,GSBRNA2T00111887001,GSBRNA2T00112072001,GSBRNA2T00112015001,GSBRNA2T00040632001,GSBRNA2T00092261001,GSBRNA2T00084398001,GSBRNA2T00054055001,GSBRNA2T00114339001,GSBRNA2T00114346001,GSBRNA2T00146835001,GSBRNA2T00085697001,GSBRNA2T00085664001,GSBRNA2T00104824001,GSBRNA2T00032154001…
GO:BP	inorganic anion transport	GO:0015698	0.000385438	3.41405	157	6221	28	80927	GSBRNA2T00068601001,GSBRNA2T00068879001,GSBRNA2T00055921001,GSBRNA2T00132977001,GSBRNA2T00132254001,GSBRNA2T00041791001,GSBRNA2T00116869001,GSBRNA2T00116867001,GSBRNA2T00123837001,GSBRNA2T00155254001,GSBRNA2T00129330001,GSBRNA2T00146264001,GSBRNA2T00146474001,GSBRNA2T00010038001,GSBRNA2T00139298001,GSBRNA2T00049924001,GSBRNA2T00005340001,GSBRNA2T00000439001,GSBRNA2T00003348001,GSBRNA2T00109274001…
GO:BP	nitrate metabolic process	GO:0042126	0.000495601	3.30487	10	6221	6	80927	GSBRNA2T00131836001,GSBRNA2T00055921001,GSBRNA2T00146496001,GSBRNA2T00147913001,GSBRNA2T00099269001,GSBRNA2T00041690001
GO:BP	nitrate assimilation	GO:0042128	0.000495601	3.30487	10	6221	6	80927	GSBRNA2T00131836001,GSBRNA2T00055921001,GSBRNA2T00146496001,GSBRNA2T00147913001,GSBRNA2T00099269001,GSBRNA2T00041690001
GO:BP	reactive nitrogen species metabolic process	GO:2001057	0.000495601	3.30487	10	6221	6	80927	GSBRNA2T00131836001,GSBRNA2T00055921001,GSBRNA2T00146496001,GSBRNA2T00147913001,GSBRNA2T00099269001,GSBRNA2T00041690001
GO:BP	oligosaccharide metabolic process	GO:0009311	0.000565019	3.24794	104	6221	21	80927	GSBRNA2T00084398001,GSBRNA2T00072498001,GSBRNA2T00000775001,GSBRNA2T00148916001,GSBRNA2T00154198001,GSBRNA2T00146462001,GSBRNA2T00081377001,GSBRNA2T00116170001,GSBRNA2T00157325001,GSBRNA2T00020794001,GSBRNA2T00044972001,GSBRNA2T00140183001,GSBRNA2T00140859001,GSBRNA2T00047446001,GSBRNA2T00079269001,GSBRNA2T00094365001,GSBRNA2T00153227001,GSBRNA2T00036513001,GSBRNA2T00069645001,GSBRNA2T00147956001…
GO:BP	interspecies interaction between organisms	GO:0044419	0.000573544	3.24143	178	6221	30	80927	GSBRNA2T00126485001,GSBRNA2T00111932001,GSBRNA2T00077858001,GSBRNA2T00104767001,GSBRNA2T00064608001,GSBRNA2T00136216001,GSBRNA2T00067206001,GSBRNA2T00009711001,GSBRNA2T00131302001,GSBRNA2T00045115001,GSBRNA2T00155325001,GSBRNA2T00146665001,GSBRNA2T00146667001,GSBRNA2T00153440001,GSBRNA2T00074055001,GSBRNA2T00062568001,GSBRNA2T00139219001,GSBRNA2T00060850001,GSBRNA2T00090460001,GSBRNA2T00072247001…
GO:BP	small molecule catabolic process	GO:0044282	0.000573544	3.24143	128	6221	24	80927	GSBRNA2T00087533001,GSBRNA2T00130859001,GSBRNA2T00009793001,GSBRNA2T00136166001,GSBRNA2T00058014001,GSBRNA2T00058154001,GSBRNA2T00154580001,GSBRNA2T00041448001,GSBRNA2T00099968001,GSBRNA2T00116787001,GSBRNA2T00043992001,GSBRNA2T00142964001,GSBRNA2T00110925001,GSBRNA2T00005466001,GSBRNA2T00075294001,GSBRNA2T00104634001,GSBRNA2T00128389001,GSBRNA2T00073644001,GSBRNA2T00031766001,GSBRNA2T00078952001…
GO:BP	defense response to other organism	GO:0098542	0.000573544	3.24143	136	6221	25	80927	GSBRNA2T00126485001,GSBRNA2T00111932001,GSBRNA2T00104767001,GSBRNA2T00064608001,GSBRNA2T00136216001,GSBRNA2T00009711001,GSBRNA2T00131302001,GSBRNA2T00155325001,GSBRNA2T00146665001,GSBRNA2T00153440001,GSBRNA2T00074055001,GSBRNA2T00062568001,GSBRNA2T00139219001,GSBRNA2T00060850001,GSBRNA2T00090460001,GSBRNA2T00072247001,GSBRNA2T00078004001,GSBRNA2T00047461001,GSBRNA2T00047460001,GSBRNA2T00122713001…
GO:BP	aromatic amino acid family catabolic process	GO:0009074	0.000598796	3.22272	24	6221	9	80927	GSBRNA2T00041448001,GSBRNA2T00099968001,GSBRNA2T00116787001,GSBRNA2T00110925001,GSBRNA2T00005466001,GSBRNA2T00073644001,GSBRNA2T00078952001,GSBRNA2T00123365001,GSBRNA2T00028728001
GO:BP	alpha-amino acid catabolic process	GO:1901606	0.000630472	3.20033	61	6221	15	80927	GSBRNA2T00130859001,GSBRNA2T00009793001,GSBRNA2T00136166001,GSBRNA2T00041448001,GSBRNA2T00099968001,GSBRNA2T00116787001,GSBRNA2T00142964001,GSBRNA2T00110925001,GSBRNA2T00005466001,GSBRNA2T00073644001,GSBRNA2T00078952001,GSBRNA2T00123365001,GSBRNA2T00028728001,GSBRNA2T00121349001,GSBRNA2T00121350001
GO:BP	response to other organism	GO:0051707	0.000788973	3.10294	139	6221	25	80927	GSBRNA2T00126485001,GSBRNA2T00111932001,GSBRNA2T00104767001,GSBRNA2T00064608001,GSBRNA2T00136216001,GSBRNA2T00009711001,GSBRNA2T00131302001,GSBRNA2T00155325001,GSBRNA2T00146665001,GSBRNA2T00153440001,GSBRNA2T00074055001,GSBRNA2T00062568001,GSBRNA2T00139219001,GSBRNA2T00060850001,GSBRNA2T00090460001,GSBRNA2T00072247001,GSBRNA2T00078004001,GSBRNA2T00047461001,GSBRNA2T00047460001,GSBRNA2T00122713001…
GO:BP	response to external biotic stimulus	GO:0043207	0.000788973	3.10294	139	6221	25	80927	GSBRNA2T00126485001,GSBRNA2T00111932001,GSBRNA2T00104767001,GSBRNA2T00064608001,GSBRNA2T00136216001,GSBRNA2T00009711001,GSBRNA2T00131302001,GSBRNA2T00155325001,GSBRNA2T00146665001,GSBRNA2T00153440001,GSBRNA2T00074055001,GSBRNA2T00062568001,GSBRNA2T00139219001,GSBRNA2T00060850001,GSBRNA2T00090460001,GSBRNA2T00072247001,GSBRNA2T00078004001,GSBRNA2T00047461001,GSBRNA2T00047460001,GSBRNA2T00122713001…
GO:BP	systemic acquired resistance	GO:0009627	0.000832954	3.07938	49	6221	13	80927	GSBRNA2T00126485001,GSBRNA2T00136216001,GSBRNA2T00009711001,GSBRNA2T00155325001,GSBRNA2T00153440001,GSBRNA2T00062568001,GSBRNA2T00139219001,GSBRNA2T00060850001,GSBRNA2T00090460001,GSBRNA2T00072247001,GSBRNA2T00078004001,GSBRNA2T00122713001,GSBRNA2T00071025001
GO:BP	nitrogen cycle metabolic process	GO:0071941	0.000921927	3.0353	11	6221	6	80927	GSBRNA2T00131836001,GSBRNA2T00055921001,GSBRNA2T00146496001,GSBRNA2T00147913001,GSBRNA2T00099269001,GSBRNA2T00041690001
GO:BP	response to stress	GO:0006950	0.000950932	3.02185	1207	6221	130	80927	GSBRNA2T00134604001,GSBRNA2T00126485001,GSBRNA2T00111932001,GSBRNA2T00077858001,GSBRNA2T00084357001,GSBRNA2T00104767001,GSBRNA2T00056381001,GSBRNA2T00064608001,GSBRNA2T00130723001,GSBRNA2T00081432001,GSBRNA2T00084637001,GSBRNA2T00076979001,GSBRNA2T00136178001,GSBRNA2T00135615001,GSBRNA2T00136273001,GSBRNA2T00136216001,GSBRNA2T00086080001,GSBRNA2T00131777001,GSBRNA2T00067206001,GSBRNA2T00081296001…
GO:BP	glucosamine-containing compound catabolic process	GO:1901072	0.000954907	3.02004	50	6221	13	80927	GSBRNA2T00000188001,GSBRNA2T00132371001,GSBRNA2T00085431001,GSBRNA2T00074333001,GSBRNA2T00129562001,GSBRNA2T00121016001,GSBRNA2T00139059001,GSBRNA2T00139054001,GSBRNA2T00139050001,GSBRNA2T00110662001,GSBRNA2T00108995001,GSBRNA2T00079751001,GSBRNA2T00079740001
GO:BP	aminoglycan catabolic process	GO:0006026	0.000954907	3.02004	50	6221	13	80927	GSBRNA2T00000188001,GSBRNA2T00132371001,GSBRNA2T00085431001,GSBRNA2T00074333001,GSBRNA2T00129562001,GSBRNA2T00121016001,GSBRNA2T00139059001,GSBRNA2T00139054001,GSBRNA2T00139050001,GSBRNA2T00110662001,GSBRNA2T00108995001,GSBRNA2T00079751001,GSBRNA2T00079740001
GO:BP	chitin metabolic process	GO:0006030	0.000954907	3.02004	50	6221	13	80927	GSBRNA2T00000188001,GSBRNA2T00132371001,GSBRNA2T00085431001,GSBRNA2T00074333001,GSBRNA2T00129562001,GSBRNA2T00121016001,GSBRNA2T00139059001,GSBRNA2T00139054001,GSBRNA2T00139050001,GSBRNA2T00110662001,GSBRNA2T00108995001,GSBRNA2T00079751001,GSBRNA2T00079740001
GO:BP	chitin catabolic process	GO:0006032	0.000954907	3.02004	50	6221	13	80927	GSBRNA2T00000188001,GSBRNA2T00132371001,GSBRNA2T00085431001,GSBRNA2T00074333001,GSBRNA2T00129562001,GSBRNA2T00121016001,GSBRNA2T00139059001,GSBRNA2T00139054001,GSBRNA2T00139050001,GSBRNA2T00110662001,GSBRNA2T00108995001,GSBRNA2T00079751001,GSBRNA2T00079740001
GO:BP	cell wall macromolecule catabolic process	GO:0016998	0.000954907	3.02004	50	6221	13	80927	GSBRNA2T00000188001,GSBRNA2T00132371001,GSBRNA2T00085431001,GSBRNA2T00074333001,GSBRNA2T00129562001,GSBRNA2T00121016001,GSBRNA2T00139059001,GSBRNA2T00139054001,GSBRNA2T00139050001,GSBRNA2T00110662001,GSBRNA2T00108995001,GSBRNA2T00079751001,GSBRNA2T00079740001
GO:BP	amino sugar catabolic process	GO:0046348	0.000954907	3.02004	50	6221	13	80927	GSBRNA2T00000188001,GSBRNA2T00132371001,GSBRNA2T00085431001,GSBRNA2T00074333001,GSBRNA2T00129562001,GSBRNA2T00121016001,GSBRNA2T00139059001,GSBRNA2T00139054001,GSBRNA2T00139050001,GSBRNA2T00110662001,GSBRNA2T00108995001,GSBRNA2T00079751001,GSBRNA2T00079740001
GO:BP	glucosamine-containing compound metabolic process	GO:1901071	0.000954907	3.02004	50	6221	13	80927	GSBRNA2T00000188001,GSBRNA2T00132371001,GSBRNA2T00085431001,GSBRNA2T00074333001,GSBRNA2T00129562001,GSBRNA2T00121016001,GSBRNA2T00139059001,GSBRNA2T00139054001,GSBRNA2T00139050001,GSBRNA2T00110662001,GSBRNA2T00108995001,GSBRNA2T00079751001,GSBRNA2T00079740001
GO:BP	aminoglycan metabolic process	GO:0006022	0.000954907	3.02004	50	6221	13	80927	GSBRNA2T00000188001,GSBRNA2T00132371001,GSBRNA2T00085431001,GSBRNA2T00074333001,GSBRNA2T00129562001,GSBRNA2T00121016001,GSBRNA2T00139059001,GSBRNA2T00139054001,GSBRNA2T00139050001,GSBRNA2T00110662001,GSBRNA2T00108995001,GSBRNA2T00079751001,GSBRNA2T00079740001
GO:BP	cellular amino acid catabolic process	GO:0009063	0.00121415	2.91573	65	6221	15	80927	GSBRNA2T00130859001,GSBRNA2T00009793001,GSBRNA2T00136166001,GSBRNA2T00041448001,GSBRNA2T00099968001,GSBRNA2T00116787001,GSBRNA2T00142964001,GSBRNA2T00110925001,GSBRNA2T00005466001,GSBRNA2T00073644001,GSBRNA2T00078952001,GSBRNA2T00123365001,GSBRNA2T00028728001,GSBRNA2T00121349001,GSBRNA2T00121350001
GO:BP	regulation of catalytic activity	GO:0050790	0.00121695	2.91473	483	6221	61	80927	GSBRNA2T00094666001,GSBRNA2T00075856001,GSBRNA2T00015833001,GSBRNA2T00065464001,GSBRNA2T00077321001,GSBRNA2T00088645001,GSBRNA2T00084598001,GSBRNA2T00076974001,GSBRNA2T00076973001,GSBRNA2T00002426001,GSBRNA2T00156317001,GSBRNA2T00013297001,GSBRNA2T00038181001,GSBRNA2T00038136001,GSBRNA2T00049100001,GSBRNA2T00049102001,GSBRNA2T00113131001,GSBRNA2T00000191001,GSBRNA2T00002062001,GSBRNA2T00063429001…
GO:BP	lipid metabolic process	GO:0006629	0.00121695	2.91473	1327	6221	140	80927	GSBRNA2T00134349001,GSBRNA2T00134289001,GSBRNA2T00089871001,GSBRNA2T00090867001,GSBRNA2T00146777001,GSBRNA2T00093848001,GSBRNA2T00079794001,GSBRNA2T00131084001,GSBRNA2T00131240001,GSBRNA2T00130809001,GSBRNA2T00130851001,GSBRNA2T00131085001,GSBRNA2T00130092001,GSBRNA2T00130161001,GSBRNA2T00067538001,GSBRNA2T00136070001,GSBRNA2T00136279001,GSBRNA2T00135440001,GSBRNA2T00131923001,GSBRNA2T00132137001…
GO:BP	defense response, incompatible interaction	GO:0009814	0.00142774	2.84535	52	6221	13	80927	GSBRNA2T00126485001,GSBRNA2T00136216001,GSBRNA2T00009711001,GSBRNA2T00155325001,GSBRNA2T00153440001,GSBRNA2T00062568001,GSBRNA2T00139219001,GSBRNA2T00060850001,GSBRNA2T00090460001,GSBRNA2T00072247001,GSBRNA2T00078004001,GSBRNA2T00122713001,GSBRNA2T00071025001
GO:BP	primary metabolic process	GO:0044238	0.00149458	2.82548	17664	6221	1474	80927	GSBRNA2T00068589001,GSBRNA2T00068620001,GSBRNA2T00069363001,GSBRNA2T00134569001,GSBRNA2T00134349001,GSBRNA2T00134448001,GSBRNA2T00134216001,GSBRNA2T00134627001,GSBRNA2T00134289001,GSBRNA2T00134148001,GSBRNA2T00134487001,GSBRNA2T00081631001,GSBRNA2T00047637001,GSBRNA2T00045443001,GSBRNA2T00021525001,GSBRNA2T00021518001,GSBRNA2T00021519001,GSBRNA2T00126273001,GSBRNA2T00126194001,GSBRNA2T00126366001…
GO:BP	developmental growth	GO:0048589	0.00162776	2.78841	46	6221	12	80927	GSBRNA2T00004537001,GSBRNA2T00132612001,GSBRNA2T00045158001,GSBRNA2T00002231001,GSBRNA2T00076284001,GSBRNA2T00139019001,GSBRNA2T00083375001,GSBRNA2T00105982001,GSBRNA2T00064711001,GSBRNA2T00099013001,GSBRNA2T00123240001,GSBRNA2T00022025001
GO:BP	growth	GO:0040007	0.00162776	2.78841	46	6221	12	80927	GSBRNA2T00004537001,GSBRNA2T00132612001,GSBRNA2T00045158001,GSBRNA2T00002231001,GSBRNA2T00076284001,GSBRNA2T00139019001,GSBRNA2T00083375001,GSBRNA2T00105982001,GSBRNA2T00064711001,GSBRNA2T00099013001,GSBRNA2T00123240001,GSBRNA2T00022025001
GO:BP	carbohydrate derivative catabolic process	GO:1901136	0.00167795	2.77522	82	6221	17	80927	GSBRNA2T00104767001,GSBRNA2T00000188001,GSBRNA2T00132371001,GSBRNA2T00085431001,GSBRNA2T00074333001,GSBRNA2T00129562001,GSBRNA2T00121016001,GSBRNA2T00156486001,GSBRNA2T00024258001,GSBRNA2T00139059001,GSBRNA2T00139054001,GSBRNA2T00139050001,GSBRNA2T00110662001,GSBRNA2T00108995001,GSBRNA2T00079751001,GSBRNA2T00079740001,GSBRNA2T00085496001
GO:BP	oxylipin metabolic process	GO:0031407	0.00177445	2.75094	17	6221	7	80927	GSBRNA2T00090867001,GSBRNA2T00132137001,GSBRNA2T00117902001,GSBRNA2T00016257001,GSBRNA2T00136769001,GSBRNA2T00099128001,GSBRNA2T00152962001
GO:BP	oxylipin biosynthetic process	GO:0031408	0.00177445	2.75094	17	6221	7	80927	GSBRNA2T00090867001,GSBRNA2T00132137001,GSBRNA2T00117902001,GSBRNA2T00016257001,GSBRNA2T00136769001,GSBRNA2T00099128001,GSBRNA2T00152962001
GO:BP	cellular response to chemical stimulus	GO:0070887	0.00191517	2.71779	482	6221	60	80927	GSBRNA2T00090984001,GSBRNA2T00055319001,GSBRNA2T00104744001,GSBRNA2T00032233001,GSBRNA2T00056381001,GSBRNA2T00022089001,GSBRNA2T00064608001,GSBRNA2T00067483001,GSBRNA2T00084637001,GSBRNA2T00076979001,GSBRNA2T00136178001,GSBRNA2T00086080001,GSBRNA2T00081296001,GSBRNA2T00063439001,GSBRNA2T00150290001,GSBRNA2T00150288001,GSBRNA2T00086813001,GSBRNA2T00137560001,GSBRNA2T00002743001,GSBRNA2T00071783001…
GO:BP	regulation of molecular function	GO:0065009	0.00210242	2.67728	494	6221	61	80927	GSBRNA2T00094666001,GSBRNA2T00075856001,GSBRNA2T00015833001,GSBRNA2T00065464001,GSBRNA2T00077321001,GSBRNA2T00088645001,GSBRNA2T00084598001,GSBRNA2T00076974001,GSBRNA2T00076973001,GSBRNA2T00002426001,GSBRNA2T00156317001,GSBRNA2T00013297001,GSBRNA2T00038181001,GSBRNA2T00038136001,GSBRNA2T00049100001,GSBRNA2T00049102001,GSBRNA2T00113131001,GSBRNA2T00000191001,GSBRNA2T00002062001,GSBRNA2T00063429001…
GO:BP	glutamine family amino acid catabolic process	GO:0009065	0.00247351	2.60669	13	6221	6	80927	GSBRNA2T00130859001,GSBRNA2T00009793001,GSBRNA2T00136166001,GSBRNA2T00142964001,GSBRNA2T00121349001,GSBRNA2T00121350001
GO:BP	organic substance catabolic process	GO:1901575	0.00272651	2.56439	1366	6221	141	80927	GSBRNA2T00134487001,GSBRNA2T00081631001,GSBRNA2T00094590001,GSBRNA2T00044850001,GSBRNA2T00044848001,GSBRNA2T00087533001,GSBRNA2T00112086001,GSBRNA2T00111896001,GSBRNA2T00111987001,GSBRNA2T00090956001,GSBRNA2T00015444001,GSBRNA2T00104767001,GSBRNA2T00064042001,GSBRNA2T00130859001,GSBRNA2T00130703001,GSBRNA2T00130425001,GSBRNA2T00101522001,GSBRNA2T00129640001,GSBRNA2T00129708001,GSBRNA2T00130020001…
GO:BP	cytokinin metabolic process	GO:0009690	0.00274863	2.56088	42	6221	11	80927	GSBRNA2T00084639001,GSBRNA2T00086089001,GSBRNA2T00132788001,GSBRNA2T00126690001,GSBRNA2T00132539001,GSBRNA2T00095729001,GSBRNA2T00001327001,GSBRNA2T00137955001,GSBRNA2T00098038001,GSBRNA2T00148152001,GSBRNA2T00123209001
GO:BP	cellular hormone metabolic process	GO:0034754	0.00274863	2.56088	42	6221	11	80927	GSBRNA2T00084639001,GSBRNA2T00086089001,GSBRNA2T00132788001,GSBRNA2T00126690001,GSBRNA2T00132539001,GSBRNA2T00095729001,GSBRNA2T00001327001,GSBRNA2T00137955001,GSBRNA2T00098038001,GSBRNA2T00148152001,GSBRNA2T00123209001
GO:BP	amino sugar metabolic process	GO:0006040	0.00339962	2.46857	57	6221	13	80927	GSBRNA2T00000188001,GSBRNA2T00132371001,GSBRNA2T00085431001,GSBRNA2T00074333001,GSBRNA2T00129562001,GSBRNA2T00121016001,GSBRNA2T00139059001,GSBRNA2T00139054001,GSBRNA2T00139050001,GSBRNA2T00110662001,GSBRNA2T00108995001,GSBRNA2T00079751001,GSBRNA2T00079740001
GO:BP	regulation of hormone levels	GO:0010817	0.00339962	2.46857	57	6221	13	80927	GSBRNA2T00129965001,GSBRNA2T00084639001,GSBRNA2T00086089001,GSBRNA2T00132788001,GSBRNA2T00126690001,GSBRNA2T00132539001,GSBRNA2T00095729001,GSBRNA2T00001327001,GSBRNA2T00137955001,GSBRNA2T00098038001,GSBRNA2T00148152001,GSBRNA2T00064711001,GSBRNA2T00123209001
GO:BP	hormone metabolic process	GO:0042445	0.00339962	2.46857	43	6221	11	80927	GSBRNA2T00084639001,GSBRNA2T00086089001,GSBRNA2T00132788001,GSBRNA2T00126690001,GSBRNA2T00132539001,GSBRNA2T00095729001,GSBRNA2T00001327001,GSBRNA2T00137955001,GSBRNA2T00098038001,GSBRNA2T00148152001,GSBRNA2T00123209001
GO:BP	response to biotic stimulus	GO:0009607	0.0036357	2.43941	164	6221	26	80927	GSBRNA2T00126485001,GSBRNA2T00111932001,GSBRNA2T00104767001,GSBRNA2T00064608001,GSBRNA2T00136216001,GSBRNA2T00009711001,GSBRNA2T00131302001,GSBRNA2T00070570001,GSBRNA2T00155325001,GSBRNA2T00146665001,GSBRNA2T00153440001,GSBRNA2T00074055001,GSBRNA2T00062568001,GSBRNA2T00139219001,GSBRNA2T00060850001,GSBRNA2T00090460001,GSBRNA2T00072247001,GSBRNA2T00078004001,GSBRNA2T00047461001,GSBRNA2T00047460001…
GO:BP	organic substance metabolic process	GO:0071704	0.00384344	2.41528	18564	6221	1536	80927	GSBRNA2T00068589001,GSBRNA2T00068620001,GSBRNA2T00069363001,GSBRNA2T00134569001,GSBRNA2T00134349001,GSBRNA2T00134448001,GSBRNA2T00134216001,GSBRNA2T00134627001,GSBRNA2T00134289001,GSBRNA2T00134148001,GSBRNA2T00134487001,GSBRNA2T00081631001,GSBRNA2T00047637001,GSBRNA2T00045443001,GSBRNA2T00021525001,GSBRNA2T00021518001,GSBRNA2T00021519001,GSBRNA2T00126273001,GSBRNA2T00126194001,GSBRNA2T00126366001…
GO:BP	aromatic amino acid family metabolic process	GO:0009072	0.00389962	2.40898	156	6221	25	80927	GSBRNA2T00149506001,GSBRNA2T00122127001,GSBRNA2T00019365001,GSBRNA2T00041448001,GSBRNA2T00099968001,GSBRNA2T00117790001,GSBRNA2T00154076001,GSBRNA2T00116787001,GSBRNA2T00001801001,GSBRNA2T00015160001,GSBRNA2T00110925001,GSBRNA2T00005466001,GSBRNA2T00044995001,GSBRNA2T00122815001,GSBRNA2T00032032001,GSBRNA2T00001383001,GSBRNA2T00073644001,GSBRNA2T00031741001,GSBRNA2T00078952001,GSBRNA2T00123365001…
GO:BP	amine metabolic process	GO:0009308	0.00393129	2.40547	174	6221	27	80927	GSBRNA2T00130859001,GSBRNA2T00084639001,GSBRNA2T00136166001,GSBRNA2T00086089001,GSBRNA2T00156187001,GSBRNA2T00132788001,GSBRNA2T00126690001,GSBRNA2T00132539001,GSBRNA2T00099968001,GSBRNA2T00116787001,GSBRNA2T00015160001,GSBRNA2T00118418001,GSBRNA2T00095729001,GSBRNA2T00100490001,GSBRNA2T00044995001,GSBRNA2T00001327001,GSBRNA2T00137955001,GSBRNA2T00098038001,GSBRNA2T00148152001,GSBRNA2T00104440001…
GO:BP	sucrose metabolic process	GO:0005985	0.00464507	2.33301	38	6221	10	80927	GSBRNA2T00072498001,GSBRNA2T00148916001,GSBRNA2T00154198001,GSBRNA2T00081377001,GSBRNA2T00157325001,GSBRNA2T00140183001,GSBRNA2T00140859001,GSBRNA2T00094365001,GSBRNA2T00069645001,GSBRNA2T00018414001
GO:BP	nitric oxide metabolic process	GO:0046209	0.00464507	2.33301	3	6221	3	80927	GSBRNA2T00131836001,GSBRNA2T00147913001,GSBRNA2T00099269001
GO:BP	nitric oxide biosynthetic process	GO:0006809	0.00464507	2.33301	3	6221	3	80927	GSBRNA2T00131836001,GSBRNA2T00147913001,GSBRNA2T00099269001
GO:BP	phosphate ion transport	GO:0006817	0.00506321	2.29557	20	6221	7	80927	GSBRNA2T00132254001,GSBRNA2T00116869001,GSBRNA2T00116867001,GSBRNA2T00155254001,GSBRNA2T00139298001,GSBRNA2T00005340001,GSBRNA2T00109715001
GO:BP	cellular response to auxin stimulus	GO:0071365	0.00535111	2.27156	187	6221	28	80927	GSBRNA2T00055319001,GSBRNA2T00104744001,GSBRNA2T00032233001,GSBRNA2T00022089001,GSBRNA2T00150290001,GSBRNA2T00150288001,GSBRNA2T00086813001,GSBRNA2T00137560001,GSBRNA2T00002743001,GSBRNA2T00071783001,GSBRNA2T00123883001,GSBRNA2T00146271001,GSBRNA2T00146535001,GSBRNA2T00057542001,GSBRNA2T00102427001,GSBRNA2T00033583001,GSBRNA2T00147059001,GSBRNA2T00048476001,GSBRNA2T00048473001,GSBRNA2T00089663001…
GO:BP	auxin-activated signaling pathway	GO:0009734	0.00535111	2.27156	187	6221	28	80927	GSBRNA2T00055319001,GSBRNA2T00104744001,GSBRNA2T00032233001,GSBRNA2T00022089001,GSBRNA2T00150290001,GSBRNA2T00150288001,GSBRNA2T00086813001,GSBRNA2T00137560001,GSBRNA2T00002743001,GSBRNA2T00071783001,GSBRNA2T00123883001,GSBRNA2T00146271001,GSBRNA2T00146535001,GSBRNA2T00057542001,GSBRNA2T00102427001,GSBRNA2T00033583001,GSBRNA2T00147059001,GSBRNA2T00048476001,GSBRNA2T00048473001,GSBRNA2T00089663001…
GO:BP	phototropism	GO:0009638	0.00556147	2.25481	15	6221	6	80927	GSBRNA2T00081614001,GSBRNA2T00092332001,GSBRNA2T00102911001,GSBRNA2T00024508001,GSBRNA2T00115341001,GSBRNA2T00139565001
GO:BP	glutamine biosynthetic process	GO:0006542	0.00689694	2.16134	21	6221	7	80927	GSBRNA2T00071300001,GSBRNA2T00135415001,GSBRNA2T00129452001,GSBRNA2T00093528001,GSBRNA2T00109126001,GSBRNA2T00153866001,GSBRNA2T00143205001
GO:BP	membrane fusion	GO:0061025	0.00767678	2.11482	70	6221	14	80927	GSBRNA2T00135386001,GSBRNA2T00021754001,GSBRNA2T00000263001,GSBRNA2T00094911001,GSBRNA2T00053941001,GSBRNA2T00105291001,GSBRNA2T00015139001,GSBRNA2T00057114001,GSBRNA2T00111101001,GSBRNA2T00093740001,GSBRNA2T00008879001,GSBRNA2T00044480001,GSBRNA2T00057403001,GSBRNA2T00015350001
GO:BP	peptidyl-tyrosine phosphorylation	GO:0018108	0.009256	2.03358	22	6221	7	80927	GSBRNA2T00045084001,GSBRNA2T00002294001,GSBRNA2T00051848001,GSBRNA2T00058375001,GSBRNA2T00031733001,GSBRNA2T00019145001,GSBRNA2T00021941001
GO:BP	peptidyl-tyrosine modification	GO:0018212	0.009256	2.03358	22	6221	7	80927	GSBRNA2T00045084001,GSBRNA2T00002294001,GSBRNA2T00051848001,GSBRNA2T00058375001,GSBRNA2T00031733001,GSBRNA2T00019145001,GSBRNA2T00021941001
GO:BP	cellular catabolic process	GO:0044248	0.00933695	2.02979	1051	6221	109	80927	GSBRNA2T00094590001,GSBRNA2T00044850001,GSBRNA2T00044848001,GSBRNA2T00087533001,GSBRNA2T00111987001,GSBRNA2T00090956001,GSBRNA2T00146827001,GSBRNA2T00015444001,GSBRNA2T00104767001,GSBRNA2T00064042001,GSBRNA2T00130859001,GSBRNA2T00130723001,GSBRNA2T00130425001,GSBRNA2T00084637001,GSBRNA2T00009793001,GSBRNA2T00076979001,GSBRNA2T00136178001,GSBRNA2T00135615001,GSBRNA2T00136166001,GSBRNA2T00136264001…
GO:BP	nucleoside transport	GO:0015858	0.012265	1.91133	43	6221	10	80927	GSBRNA2T00152407001,GSBRNA2T00095261001,GSBRNA2T00083829001,GSBRNA2T00042998001,GSBRNA2T00042997001,GSBRNA2T00000906001,GSBRNA2T00000905001,GSBRNA2T00060365001,GSBRNA2T00067794001,GSBRNA2T00050485001
GO:BP	nucleoside transmembrane transport	GO:1901642	0.012265	1.91133	43	6221	10	80927	GSBRNA2T00152407001,GSBRNA2T00095261001,GSBRNA2T00083829001,GSBRNA2T00042998001,GSBRNA2T00042997001,GSBRNA2T00000906001,GSBRNA2T00000905001,GSBRNA2T00060365001,GSBRNA2T00067794001,GSBRNA2T00050485001
GO:BP	erythrose 4-phosphate/phosphoenolpyruvate family amino acid catabolic process	GO:1902222	0.0125137	1.90261	12	6221	5	80927	GSBRNA2T00041448001,GSBRNA2T00110925001,GSBRNA2T00005466001,GSBRNA2T00073644001,GSBRNA2T00078952001
GO:BP	L-phenylalanine catabolic process	GO:0006559	0.0125137	1.90261	12	6221	5	80927	GSBRNA2T00041448001,GSBRNA2T00110925001,GSBRNA2T00005466001,GSBRNA2T00073644001,GSBRNA2T00078952001
GO:BP	cellular response to endogenous stimulus	GO:0071495	0.0136613	1.86451	238	6221	32	80927	GSBRNA2T00055319001,GSBRNA2T00104744001,GSBRNA2T00032233001,GSBRNA2T00022089001,GSBRNA2T00064608001,GSBRNA2T00150290001,GSBRNA2T00150288001,GSBRNA2T00086813001,GSBRNA2T00137560001,GSBRNA2T00002743001,GSBRNA2T00071783001,GSBRNA2T00123883001,GSBRNA2T00146271001,GSBRNA2T00146535001,GSBRNA2T00057542001,GSBRNA2T00102427001,GSBRNA2T00074055001,GSBRNA2T00033583001,GSBRNA2T00147059001,GSBRNA2T00048476001…
GO:BP	reactive oxygen species biosynthetic process	GO:1903409	0.0155784	1.80748	4	6221	3	80927	GSBRNA2T00131836001,GSBRNA2T00147913001,GSBRNA2T00099269001
GO:BP	defense response to bacterium	GO:0042742	0.0155784	1.80748	18	6221	6	80927	GSBRNA2T00111932001,GSBRNA2T00104767001,GSBRNA2T00074055001,GSBRNA2T00071551001,GSBRNA2T00071552001,GSBRNA2T00071554001
GO:BP	developmental cell growth	GO:0048588	0.0155784	1.80748	4	6221	3	80927	GSBRNA2T00004537001,GSBRNA2T00083375001,GSBRNA2T00064711001
GO:BP	purine-containing compound transmembrane transport	GO:0072530	0.0170352	1.76865	31	6221	8	80927	GSBRNA2T00095261001,GSBRNA2T00042998001,GSBRNA2T00042997001,GSBRNA2T00000906001,GSBRNA2T00000905001,GSBRNA2T00060365001,GSBRNA2T00067794001,GSBRNA2T00050485001
GO:BP	purine nucleoside transmembrane transport	GO:0015860	0.0170352	1.76865	31	6221	8	80927	GSBRNA2T00095261001,GSBRNA2T00042998001,GSBRNA2T00042997001,GSBRNA2T00000906001,GSBRNA2T00000905001,GSBRNA2T00060365001,GSBRNA2T00067794001,GSBRNA2T00050485001
GO:BP	zinc ion transport	GO:0006829	0.0170352	1.76865	31	6221	8	80927	GSBRNA2T00000160001,GSBRNA2T00086311001,GSBRNA2T00113362001,GSBRNA2T00074368001,GSBRNA2T00061247001,GSBRNA2T00112667001,GSBRNA2T00061684001,GSBRNA2T00037005001
GO:BP	zinc ion transmembrane transport	GO:0071577	0.0170352	1.76865	31	6221	8	80927	GSBRNA2T00000160001,GSBRNA2T00086311001,GSBRNA2T00113362001,GSBRNA2T00074368001,GSBRNA2T00061247001,GSBRNA2T00112667001,GSBRNA2T00061684001,GSBRNA2T00037005001
GO:BP	jasmonic acid metabolic process	GO:0009694	0.0178827	1.74757	13	6221	5	80927	GSBRNA2T00136279001,GSBRNA2T00117871001,GSBRNA2T00117873001,GSBRNA2T00074055001,GSBRNA2T00077985001
GO:BP	trehalose metabolic process	GO:0005991	0.0178827	1.74757	53	6221	11	80927	GSBRNA2T00084398001,GSBRNA2T00000775001,GSBRNA2T00146462001,GSBRNA2T00116170001,GSBRNA2T00020794001,GSBRNA2T00044972001,GSBRNA2T00047446001,GSBRNA2T00079269001,GSBRNA2T00153227001,GSBRNA2T00036513001,GSBRNA2T00147956001
GO:BP	cation transport	GO:0006812	0.0182123	1.73963	918	6221	95	80927	GSBRNA2T00126288001,GSBRNA2T00094757001,GSBRNA2T00044756001,GSBRNA2T00130533001,GSBRNA2T00130892001,GSBRNA2T00065867001,GSBRNA2T00122225001,GSBRNA2T00122226001,GSBRNA2T00136463001,GSBRNA2T00136268001,GSBRNA2T00086067001,GSBRNA2T00156267001,GSBRNA2T00000160001,GSBRNA2T00106939001,GSBRNA2T00131470001,GSBRNA2T00086311001,GSBRNA2T00019373001,GSBRNA2T00019374001,GSBRNA2T00113362001,GSBRNA2T00053943001…
GO:BP	response to bacterium	GO:0009617	0.0201298	1.69616	19	6221	6	80927	GSBRNA2T00111932001,GSBRNA2T00104767001,GSBRNA2T00074055001,GSBRNA2T00071551001,GSBRNA2T00071552001,GSBRNA2T00071554001
GO:BP	erythrose 4-phosphate/phosphoenolpyruvate family amino acid metabolic process	GO:1902221	0.0203169	1.69214	32	6221	8	80927	GSBRNA2T00019365001,GSBRNA2T00041448001,GSBRNA2T00154076001,GSBRNA2T00110925001,GSBRNA2T00005466001,GSBRNA2T00001383001,GSBRNA2T00073644001,GSBRNA2T00078952001
GO:BP	regulation of DNA replication	GO:0006275	0.0203169	1.69214	54	6221	11	80927	GSBRNA2T00111646001,GSBRNA2T00052910001,GSBRNA2T00000388001,GSBRNA2T00063861001,GSBRNA2T00100616001,GSBRNA2T00138860001,GSBRNA2T00089802001,GSBRNA2T00032100001,GSBRNA2T00038264001,GSBRNA2T00031690001,GSBRNA2T00072918001
GO:BP	L-phenylalanine metabolic process	GO:0006558	0.0203169	1.69214	32	6221	8	80927	GSBRNA2T00019365001,GSBRNA2T00041448001,GSBRNA2T00154076001,GSBRNA2T00110925001,GSBRNA2T00005466001,GSBRNA2T00001383001,GSBRNA2T00073644001,GSBRNA2T00078952001
GO:BP	cellular response to hormone stimulus	GO:0032870	0.0223409	1.6509	237	6221	31	80927	GSBRNA2T00055319001,GSBRNA2T00104744001,GSBRNA2T00032233001,GSBRNA2T00022089001,GSBRNA2T00150290001,GSBRNA2T00150288001,GSBRNA2T00086813001,GSBRNA2T00137560001,GSBRNA2T00002743001,GSBRNA2T00071783001,GSBRNA2T00123883001,GSBRNA2T00146271001,GSBRNA2T00146535001,GSBRNA2T00057542001,GSBRNA2T00102427001,GSBRNA2T00074055001,GSBRNA2T00033583001,GSBRNA2T00147059001,GSBRNA2T00048476001,GSBRNA2T00048473001…
[truncated: 1,260 more rows]

## Sheet: BP_upregDEGs_leaf
source	term_name	term_id	adjusted_p_value	negative_log10_of_adjusted_p_value	term_size	query_size	intersection_size	effective_domain_size	intersections
[truncated: 907 more rows]

[truncated: 5 more sheets: BP_downregDEGs_leaf, BP_upregDEGs_stem, BP_downregDEGs_stem, BP_upregDEGs_root, BP_downregDEGs_root]
