# Supplementary material for: In Silico Identification of the Complex Interplay between Regulatory SNPs, Transcription Factors, and Their Related Genes in Brassica napus L. Using Multi-Omics Data
Source: MDPI journal article supplement (doi:10.3390/ijms22020789), 2021-01-14
Supplement: s1 [file s1 › Suppl_Material/Suppl_TableS3_enriched_TFs.xlsx]

## Sheet: enriched_TFs_flower
transcription_factor	TF_family	adjusted_pValue
BEE2	bHLH	1.22919e-22
ABI5	bZIP	4.8311e-22
BIM3	bHLH	7.12497e-22
PHYPADRAFT_143875	bHLH	7.12497e-22
SPT	bHLH	9.90463e-22
ABF2	bZIP	1.14714e-21
HYH	bZIP	6.76939e-21
ABF4	bZIP	6.26443e-19
EmBP-1	bZIP	1.40751e-16
PIF1	bHLH	4.71974e-15
BZR1	BES1	2.59706e-14
BIM2	bHLH	1.84398e-13
bZIP28	bZIP	2.83608e-13
ABF1	bZIP	1.93979e-12
NAC055	NAC	9.27136e-11
TGA5	bZIP	1.00345e-10
GT-A3	Tryptophan cluster factors/ Trihelix	1.28429e-10
GBF2	bZIP	1.40389e-10
NAC043	NAC	1.09467e-09
PHYPADRAFT_72483	bHLH	1.17927e-08
NAC025	NAC	1.33095e-08
MYC4	bHLH	2.10718e-08
MYC3	bHLH	4.69719e-08
NAC058	NAC	5.89944e-08
HBI1	bHLH	5.91376e-08
BEH4	BES1	6.09607e-08
T11I18.17	NAC	8.77917e-08
BEH2	BES1	1.083e-07
BEH3	BES1	1.35511e-07
AREB3	bZIP	1.80528e-07
PIF7	bHLH	1.92777e-07
bHLH74	bHLH	2.25709e-07
OJ1058_F05.8	bZIP	2.38387e-07
UNE10	bHLH	2.38387e-07
bHLH69	bHLH	2.40536e-07
NAC080	NAC	2.60859e-07
PIF5	bHLH	6.22739e-07
BHLH34	bHLH	6.55019e-07
BHLH3	bHLH	7.11754e-07
BHLH13	bHLH	1.91747e-06
NAC083	NAC	2.87337e-06
DPBF3	bZIP	7.18039e-06
PHYPADRAFT_48267	bHLH	8.94988e-06
bHLH18	bHLH	1.36404e-05
bHLH31	bHLH	1.39592e-05
ABF3	bZIP	1.48292e-05
RAMOSA1	C2H2 zinc finger factors	5.01681e-05
MYB119	Myb	5.41958e-05
FaEOBII	Myb-related	7.86434e-05
MYC2	bHLH	8.18766e-05
dof4.2	C2H2 zinc finger factors/ Dof type	9.24302e-05
AT5G66940	C2H2 zinc finger factors/ Dof type	9.24477e-05
bZIP14	bZIP	9.84355e-05
TGA6	bZIP	9.84355e-05
bZIP910	bZIP	0.00012218
PIF3	bHLH	0.00012424
bHLH77	bHLH	0.000158671
squamosa	MADS box factors / M-type_MADS	0.000213194
AT5G02460	C2H2 zinc finger factors/ Dof type	0.000228402
FUS3	B3 domain	0.000232133
NAC028	NAC	0.000247287
PIF4	bHLH	0.000306327
TGA2	bZIP	0.000401812
bZIP16	bZIP	0.000458495
BIM1	bHLH	0.000466989
AP1	MADS box factors	0.000519668
MYB46	Myb/SANT domain factors	0.000826751
MYB98	Myb	0.00102993
OBP3	C2H2 zinc finger factors/ Dof type	0.00122397
MYB111	Myb/SANT domain factors	0.00163803
MYB59	Myb/SANT domain factors	0.00229121
AT2G28810	C2H2 zinc finger factors/ Dof type	0.00276303
TGA4	bZIP	0.00588959
SPL11	SBP-type zinc finger	0.00668327

## Sheet: enriched_TFs_leaf
transcription_factor	TF_family	adjusted_pValue
ARALYDRAFT_897773	bHLH/ TCP domain	2.02517e-07
BEE2	bHLH	4.99824e-06
ABF4	bZIP	6.40163e-06
PIF1	bHLH	1.29648e-05
PIF7	bHLH	1.69268e-05
ABF2	bZIP	3.238e-05
ABI5	bZIP	7.30367e-05
BIM3	bHLH	8.37018e-05
PHYPADRAFT_143875	bHLH	8.37018e-05
BIM2	bHLH	0.000129103
EmBP-1	bZIP	0.000169882
bZIP28	bZIP	0.000215974
BZR1	BES1	0.000268383
SPT	bHLH	0.000426609
PIF3	bHLH	0.000602435
HYH	bZIP	0.00115209
bHLH31	bHLH	0.00247803
OJ1058_F05.8	bZIP	0.00282873
UNE10	bHLH	0.00282873
GT-A3	Tryptophan cluster factors/ Trihelix	0.00334922
bHLH74	bHLH	0.00348878
GBF2	bZIP	0.00357718
RAMOSA1	C2H2 zinc finger factors	0.00408995
PIF5	bHLH	0.00435827
PIF4	bHLH	0.00495427
BEH2	BES1	0.00625805
TCP16	bHLH/ TCP domain	0.00939972

## Sheet: enriched_TFs_stem
transcription_factor	TF_family	adjusted_pValue
BEH2	BES1	0.000330104
BEH4	BES1	0.000378061
AREB3	bZIP	0.000391889
PIF7	bHLH	0.000917882
BEH3	BES1	0.00124143
bHLH74	bHLH	0.00160632
PIF1	bHLH	0.00447967
OJ1058_F05.8	bZIP	0.00462731
UNE10	bHLH	0.00462731
ABF1	bZIP	0.00847863

## Sheet: enriched_TFs_root
transcription_factor	TF_family	adjusted_pValue
GATA19	GATA-type zinc fingers	0.00506085
