# Supplementary material for: In Silico Identification of the Complex Interplay between Regulatory SNPs, Transcription Factors, and Their Related Genes in Brassica napus L. Using Multi-Omics Data
Source: MDPI journal article supplement (doi:10.3390/ijms22020789), 2021-01-14
Supplement: s1 [file s1 › Suppl_Material/Suppl_TableS4_rSNPs_with_TFBS_predictions.xlsx]

## Sheet: Suppl_TableS3_rSNPs_with_TFBS_p
generic_snp_id	chr	snp_positon	ref	alt	gene_id	snp_distance_to_TSS	allele_of_TFBS_match	TF_name	TFBS_starting_position	strand_of_TFBS	core_sim_score	matrix_sim_score	binding_seq	consequence
bna100005	A03	28505300	C	G	BnaA03g54030D	60	0	AIL7	26	-	0.917	0.884	CTTGAgagctg	Loss of TFBS
bna100005	A03	28505300	C	G	BnaA03g54030D	60	0	BHLH112	22	+	1	0.916	acgACTTGa	Loss of TFBS
bna100005	A03	28505300	C	G	BnaA03g54030D	60	0	bHLH130	21	+	1	0.936	gacgACTTGag	Loss of TFBS
bna100005	A03	28505300	C	G	BnaA03g54030D	60	0	bHLH80	21	-	1	0.898	gacgACTTGag	Loss of TFBS
bna100005	A03	28505300	C	G	BnaA03g54030D	60	1	CMTA3	22	+	0.936	0.922	aCGAGTtga	Gain of TFBS
bna100080	A03	28709949	G	A	BnaA03g54230D	-324	0	AG	16	-	0.978	0.924	tctcaaTTGGG	Loss of TFBS
bna100087	A03	28713558	C	T	BnaA03g54250D	-474	0	MYB1	21	+	1	0.91	tagaCCGTTttgttcttat	Loss of TFBS
bna100087	A03	28713558	C	T	BnaA03g54250D	-474	0	MYB3R1	17	+	1	0.915	gttttagaCCGTTtt	Loss of TFBS
bna100087	A03	28713558	C	T	BnaA03g54250D	-474	0	MYB3R4	17	+	1	0.9	gttttagaCCGTTtt	Loss of TFBS
bna100087	A03	28713558	C	T	BnaA03g54250D	-474	0	MYB3R5	16	+	1	0.895	tgttttagaCCGTTt	Loss of TFBS
bna100087	A03	28713558	C	T	BnaA03g54250D	-474	0	MYB52	20	+	1	0.946	ttagaCCGTTt	Loss of TFBS
bna100087	A03	28713558	C	T	BnaA03g54250D	-474	0	MYB70	17	-	0.994	0.921	gttttagaCCGTTt	Loss of TFBS
bna100109	A03	28833254	T	C	BnaA03g54310D	-407	0	HMG-1	24	+	1	0.986	GTTGTcttc	Loss of TFBS
bna100158	A03	29049853	T	C	BnaA03g54420D	13	0	MNB1A	26	-	0.97	0.97	TCTTT	Loss of TFBS
bna100160	A03	29049950	T	C	BnaA03g54420D	-84	0	AGL25	23	+	1	0.907	acTTTCCttgatgggtta	Loss of TFBS
bna100160	A03	29049950	T	C	BnaA03g54420D	-84	0	Dof2	22	-	0.961	0.961	aACTTT	Loss of TFBS
bna100160	A03	29049950	T	C	BnaA03g54420D	-84	0	Dof3	22	-	0.994	0.971	aACTTT	Loss of TFBS
bna100160	A03	29049950	T	C	BnaA03g54420D	-84	0	MNB1A	23	-	0.97	0.97	ACTTT	Loss of TFBS
bna100160	A03	29049950	T	C	BnaA03g54420D	-84	0	PBF	23	-	0.985	0.985	ACTTT	Loss of TFBS
bna10021	A01	6375997	G	A	BnaA01g12760D	-42	0	AGL25	14	-	1	0.874	atagagaatatGGAAAtt	Loss of TFBS
bna10021	A01	6375997	G	A	BnaA01g12760D	-42	0	HSFB2A	22	-	0.948	0.919	taTGGAAatttc	Loss of TFBS
bna10022	A01	6376154	T	A	BnaA01g12760D	-199	1	SEP3	23	-	1	0.918	gCAAAAatgga	Gain of TFBS
bna10023	A01	6376187	A	T	BnaA01g12760D	-232	0	AT2G28810	9	-	1	0.908	gaAAAAGtctaaattcaaaat	Loss of TFBS
bna10023	A01	6376187	A	T	BnaA01g12760D	-232	0	AT5G66940	3	-	1	0.892	gacaaagaAAAAGtctaaattcaaaattt	Loss of TFBS
bna10023	A01	6376187	A	T	BnaA01g12760D	-232	0	TCX2	14	+	1	0.948	agtctAAATTcaaaa	Loss of TFBS
bna10023	A01	6376187	A	T	BnaA01g12760D	-232	0	TCX3	17	+	1	0.958	ctaaatTCAAAatt	Loss of TFBS
bna100234	A03	29299321	T	C	BnaA03g54560D	47	0	ABF4	19	+	1	0.965	cacCACGTttat	Loss of TFBS
bna100234	A03	29299321	T	C	BnaA03g54560D	47	0	BEE2	20	+	1	0.92	acCACGTtta	Loss of TFBS
bna100234	A03	29299321	T	C	BnaA03g54560D	47	0	BEE2	20	-	0.913	0.92	accACGTTta	Loss of TFBS
bna100234	A03	29299321	T	C	BnaA03g54560D	47	0	bZIP28	19	-	1	0.866	cacCACGTttatagt	Loss of TFBS
bna100234	A03	29299321	T	C	BnaA03g54560D	47	0	EmBP-1	21	-	1	0.983	cCACGTtt	Loss of TFBS
bna100234	A03	29299321	T	C	BnaA03g54560D	47	0	SPT	20	+	1	0.941	acCACGTtt	Loss of TFBS
bna100241	A03	29307201	A	G	BnaA03g54580D	56	0	myb.Ph3	25	+	0.995	0.953	aAACAGttt	Loss of TFBS
bna100241	A03	29307201	A	G	BnaA03g54580D	56	0	myb.Ph3	25	-	0.997	0.954	aaaCAGTTt	Loss of TFBS
bna100241	A03	29307201	A	G	BnaA03g54580D	56	0	MYB1	16	-	0.933	0.862	cacgagacgaAACAGtttg	Loss of TFBS
bna100241	A03	29307201	A	G	BnaA03g54580D	56	0	NAC029	19	+	0.948	0.902	gagACGAAacagt	Loss of TFBS
bna100241	A03	29307201	A	G	BnaA03g54580D	56	1	F3A4.140	22	+	1	0.919	acgagaCAGTTtg	Gain of TFBS
bna10025	A01	6376376	A	G	BnaA01g12760D	-421	0	AHL25	21	+	1	1	AATTAatt	Loss of TFBS
bna10025	A01	6376376	A	G	BnaA01g12760D	-421	0	AHL25	21	-	1	1	aatTAATT	Loss of TFBS
bna10025	A01	6376376	A	G	BnaA01g12760D	-421	0	ATHB23	19	+	1	1	ttAATTAatt	Loss of TFBS
bna10025	A01	6376376	A	G	BnaA01g12760D	-421	0	HDG1	19	+	1	0.93	ttaaTTAATtc	Loss of TFBS
bna10025	A01	6376376	A	G	BnaA01g12760D	-421	0	ZHD1	16	+	1	0.986	tgatTAATTaattct	Loss of TFBS
bna100255	A03	29343880	A	G	BnaA03g54590D	-236	0	ATHB34	13	-	0.928	0.944	tCATTAatcagtaaa	Loss of TFBS
bna10026	A01	6376383	C	A	BnaA01g12760D	-428	0	MYB1	22	+	0.936	0.875	cttaCAGTTtttagccaat	Loss of TFBS
bna10026	A01	6376383	C	A	BnaA01g12760D	-428	0	MYB70	18	-	0.994	0.923	aattcttaCAGTTt	Loss of TFBS
bna10026	A01	6376383	C	A	BnaA01g12760D	-428	0	MYB77	17	+	0.985	0.912	taattcttaCAGTTt	Loss of TFBS
bna10026	A01	6376383	C	A	BnaA01g12760D	-428	1	MNB1A	25	+	0.97	0.97	AAAGT	Gain of TFBS
bna10026	A01	6376383	C	A	BnaA01g12760D	-428	1	PBF	25	+	0.985	0.985	AAAGT	Gain of TFBS
bna10026	A01	6376383	C	A	BnaA01g12760D	-428	1	Dof2	25	+	0.961	0.961	AAAGTt	Gain of TFBS
bna10026	A01	6376383	C	A	BnaA01g12760D	-428	1	Dof3	25	+	0.994	0.971	AAAGTt	Gain of TFBS
bna100337	A03	29623450	G	A	BnaA03g54680D	-347	0	ERF069	21	+	0.989	0.979	gAGCCGgag	Loss of TFBS
bna100337	A03	29623450	G	A	BnaA03g54680D	-347	0	LBD18	21	+	1	0.953	gagCCGGAgact	Loss of TFBS
bna100337	A03	29623450	G	A	BnaA03g54680D	-347	1	HSFC1	24	+	0.904	0.865	CCAGAgacttc	Gain of TFBS
bna100359	A03	29673815	C	G	BnaA03g54710D	-216	0	abi4	23	+	0.958	0.916	CGCCGccttt	Loss of TFBS
bna100359	A03	29673815	C	G	BnaA03g54710D	-216	0	AT2G33710	21	+	1	0.961	cacgCCGCCtt	Loss of TFBS
bna100359	A03	29673815	C	G	BnaA03g54710D	-216	0	AT4G16750	17	+	0.955	0.875	atctcacgCCGCCtt	Loss of TFBS
bna100359	A03	29673815	C	G	BnaA03g54710D	-216	0	AT4G18450	15	-	1	0.898	caatctcacgCCGCCtt	Loss of TFBS
bna100359	A03	29673815	C	G	BnaA03g54710D	-216	0	CRF2	22	+	1	0.985	acGCCGCc	Loss of TFBS
bna100359	A03	29673815	C	G	BnaA03g54710D	-216	0	CRF4	22	+	1	0.978	aCGCCGcc	Loss of TFBS
bna100359	A03	29673815	C	G	BnaA03g54710D	-216	0	ERF008	23	+	1	0.991	CGCCGcct	Loss of TFBS
bna100359	A03	29673815	C	G	BnaA03g54710D	-216	0	ERF017	19	-	0.984	0.887	ctcacgCCGCCttt	Loss of TFBS
bna100359	A03	29673815	C	G	BnaA03g54710D	-216	0	ERF069	22	+	1	0.998	aCGCCGcct	Loss of TFBS
bna100359	A03	29673815	C	G	BnaA03g54710D	-216	0	ERF094	23	+	1	0.994	cGCCGCct	Loss of TFBS
bna100359	A03	29673815	C	G	BnaA03g54710D	-216	0	ERF096	22	+	1	0.998	acGCCGCctt	Loss of TFBS
bna100359	A03	29673815	C	G	BnaA03g54710D	-216	0	ERF098	22	+	1	0.999	acGCCGCc	Loss of TFBS
bna100359	A03	29673815	C	G	BnaA03g54710D	-216	0	ERF10	12	+	1	0.902	aaacaatctcacgCCGCCttt	Loss of TFBS
bna100359	A03	29673815	C	G	BnaA03g54710D	-216	0	ERF104	14	+	1	0.888	acaatctcacgCCGCCttt	Loss of TFBS
bna100359	A03	29673815	C	G	BnaA03g54710D	-216	0	ERF105	20	-	1	0.923	tcacgCCGCCtttaa	Loss of TFBS
bna100359	A03	29673815	C	G	BnaA03g54710D	-216	0	ERF109	22	+	1	0.951	aCGCCGcc	Loss of TFBS
bna100359	A03	29673815	C	G	BnaA03g54710D	-216	0	ERF112	21	+	1	0.977	caCGCCGcct	Loss of TFBS
bna100359	A03	29673815	C	G	BnaA03g54710D	-216	0	ERF118	20	+	1	0.951	tcaCGCCGcct	Loss of TFBS
bna100359	A03	29673815	C	G	BnaA03g54710D	-216	0	ERF13	23	+	1	0.993	cgCCGCCt	Loss of TFBS
bna100359	A03	29673815	C	G	BnaA03g54710D	-216	0	ERF15	17	+	1	0.923	atctcacgCCGCCtt	Loss of TFBS
bna100359	A03	29673815	C	G	BnaA03g54710D	-216	0	ERF1B	23	+	1	0.98	cGCCGCct	Loss of TFBS
bna100359	A03	29673815	C	G	BnaA03g54710D	-216	0	ERF2	13	+	1	0.904	aacaatctcacgCCGCCttta	Loss of TFBS
bna100359	A03	29673815	C	G	BnaA03g54710D	-216	0	ERF3	23	+	1	0.973	CGCCGcct	Loss of TFBS
bna100359	A03	29673815	C	G	BnaA03g54710D	-216	0	ERF3	21	+	1	0.962	cacgCCGCCtt	Loss of TFBS
bna100359	A03	29673815	C	G	BnaA03g54710D	-216	0	ERF4	22	+	1	0.988	aCGCCGcc	Loss of TFBS
bna100359	A03	29673815	C	G	BnaA03g54710D	-216	0	ERF7	23	+	1	0.995	cGCCGCcttt	Loss of TFBS
bna100359	A03	29673815	C	G	BnaA03g54710D	-216	0	ERF8	23	+	1	0.993	CGCCGccttt	Loss of TFBS
bna100359	A03	29673815	C	G	BnaA03g54710D	-216	0	ESE1	19	-	1	0.895	ctcacgCCGCCttta	Loss of TFBS
bna100359	A03	29673815	C	G	BnaA03g54710D	-216	0	Os05g0497200	23	+	1	0.964	CGCCGcct	Loss of TFBS
bna100359	A03	29673815	C	G	BnaA03g54710D	-216	0	RAP2-3	22	+	1	0.983	acGCCGCc	Loss of TFBS
bna100359	A03	29673815	C	G	BnaA03g54710D	-216	0	RAP2-6	22	+	1	0.954	aCGCCGcc	Loss of TFBS
bna100359	A03	29673815	C	G	BnaA03g54710D	-216	0	RAP211	16	+	0.973	0.923	aatctcacgCCGCCt	Loss of TFBS
bna100359	A03	29673815	C	G	BnaA03g54710D	-216	0	RAP212	19	-	1	0.921	ctcacGCCGCctttaatatcc	Loss of TFBS
bna100359	A03	29673815	C	G	BnaA03g54710D	-216	1	MYB124	20	+	0.925	0.93	tcaCGCGGcc	Gain of TFBS
bna100359	A03	29673815	C	G	BnaA03g54710D	-216	1	ERF069	22	-	0.988	0.982	acgCGGCCt	Gain of TFBS
bna100359	A03	29673815	C	G	BnaA03g54710D	-216	1	CMTA2	22	-	1	0.997	ACGCGgcct	Gain of TFBS
bna100359	A03	29673815	C	G	BnaA03g54710D	-216	1	BIM1	18	-	0.972	0.973	tctCACGCgg	Gain of TFBS
bna100359	A03	29673815	C	G	BnaA03g54710D	-216	1	CMTA3	19	-	1	1	ctcACGCGg	Gain of TFBS
bna100359	A03	29673815	C	G	BnaA03g54710D	-216	1	CAMTA1	19	-	1	0.917	ctcACGCGgcct	Gain of TFBS
bna100453	A04	9317	G	A	BnaA04g00010D	-9	0	abi4	19	+	0.965	0.911	CGCTGcagtc	Loss of TFBS
bna100469	A04	21073	A	T	BnaA04g00040D	-489	0	REF6	19	+	1	0.985	aaaaCAGAGtt	Loss of TFBS
bna100469	A04	21073	A	T	BnaA04g00040D	-489	1	STZ	23	-	0.983	0.928	cAGTGTttttg	Gain of TFBS
bna100471	A04	21163	G	A	BnaA04g00040D	-399	0	ARR10	20	+	1	0.953	AGATCggc	Loss of TFBS
bna100471	A04	21163	G	A	BnaA04g00040D	-399	0	ERF069	21	-	0.989	0.976	gatCGGCTg	Loss of TFBS
bna100471	A04	21163	G	A	BnaA04g00040D	-399	0	GATA14	17	+	1	0.924	tctAGATCggctgtt	Loss of TFBS
bna100471	A04	21163	G	A	BnaA04g00040D	-399	0	GATA19	19	+	1	0.903	taGATCGgctg	Loss of TFBS
bna100472	A04	21337	C	T	BnaA04g00040D	-225	0	AGL25	21	+	1	0.868	ttTTTCCttttatatgtt	Loss of TFBS
bna100472	A04	21337	C	T	BnaA04g00040D	-225	0	AP1	23	-	0.912	0.933	tttcctTTTATat	Loss of TFBS
bna100472	A04	21337	C	T	BnaA04g00040D	-225	0	dof4.2	19	-	1	0.927	tatttttcCTTTTatatgt	Loss of TFBS
bna100472	A04	21337	C	T	BnaA04g00040D	-225	0	squamosa	22	-	0.897	0.876	ttttCCTTTtatat	Loss of TFBS
bna100472	A04	21337	C	T	BnaA04g00040D	-225	1	MNB1A	26	-	0.97	0.97	TCTTT	Gain of TFBS
bna100472	A04	21337	C	T	BnaA04g00040D	-225	1	OBP3	23	+	1	0.887	ttttCTTTTatatgttattgg	Gain of TFBS
bna100503	A04	36488	G	C	BnaA04g00060D	-264	1	SPL9	19	-	0.993	0.952	gtcAGTACtag	Gain of TFBS
bna100503	A04	36488	G	C	BnaA04g00060D	-264	1	SPL9	20	+	0.993	0.931	tcaGTACTagt	Gain of TFBS
bna100503	A04	36488	G	C	BnaA04g00060D	-264	1	SPL8	17	+	0.981	0.925	tagtcAGTACtagtac	Gain of TFBS
bna100503	A04	36488	G	C	BnaA04g00060D	-264	1	SPL8	17	-	0.981	0.899	tagtcaGTACTagtac	Gain of TFBS
bna100504	A04	36545	C	T	BnaA04g00060D	-207	0	RAV1	17	-	1	0.968	taaaTGTTGcac	Loss of TFBS
bna100504	A04	36545	C	T	BnaA04g00060D	-207	1	SPL9	21	-	0.953	0.933	tgtTGTACaaa	Gain of TFBS
bna100504	A04	36545	C	T	BnaA04g00060D	-207	1	SPL9	22	+	0.953	0.936	gttGTACAaag	Gain of TFBS
bna100504	A04	36545	C	T	BnaA04g00060D	-207	1	SPL8	19	+	1	0.911	aatgtTGTACaaagaa	Gain of TFBS
bna100504	A04	36545	C	T	BnaA04g00060D	-207	1	SPL8	19	-	1	0.976	aatgttGTACAaagaa	Gain of TFBS
bna10051	A01	6380797	T	G	BnaA01g12770D	-182	1	ZHD5	22	+	1	0.954	gtttgATTAAg	Gain of TFBS
bna100514	A04	46595	C	A	BnaA04g00090D	-499	0	CMTA3	22	-	0.928	0.93	agaACCCGg	Loss of TFBS
bna10053	A01	6381083	T	C	BnaA01g12770D	-468	0	MNB1A	26	-	0.97	0.97	TCTTT	Loss of TFBS
bna100550	A04	104084	T	A	BnaA04g00190D	-299	1	ATHB-51	21	-	1	1	caATAATt	Gain of TFBS
bna100550	A04	104084	T	A	BnaA04g00190D	-299	1	ATHB53	20	+	1	0.974	tcAATAAtttt	Gain of TFBS
bna100550	A04	104084	T	A	BnaA04g00190D	-299	1	ATHB-12	21	-	0.958	0.965	cAATAAtt	Gain of TFBS
bna100550	A04	104084	T	A	BnaA04g00190D	-299	1	ATHB-16	21	+	1	0.963	cAATAAtt	Gain of TFBS
bna100550	A04	104084	T	A	BnaA04g00190D	-299	1	ATHB13	20	+	1	0.996	tcAATAAtttt	Gain of TFBS
bna100550	A04	104084	T	A	BnaA04g00190D	-299	1	ATHB18	20	+	0.966	0.972	tcaATAATttt	Gain of TFBS
bna100550	A04	104084	T	A	BnaA04g00190D	-299	1	ATHB4	21	+	0.98	0.937	caATAATttt	Gain of TFBS
bna100550	A04	104084	T	A	BnaA04g00190D	-299	1	ATHB4	20	-	0.985	0.949	tcaATAATtt	Gain of TFBS
bna100550	A04	104084	T	A	BnaA04g00190D	-299	1	ATHB-5	20	+	0.977	0.976	tcaATAATt	Gain of TFBS
bna100550	A04	104084	T	A	BnaA04g00190D	-299	1	ATHB-5	22	-	1	0.93	aATAATttt	Gain of TFBS
bna100550	A04	104084	T	A	BnaA04g00190D	-299	1	ATHB-5	19	+	0.903	0.93	ttcAATAAtttt	Gain of TFBS
bna100550	A04	104084	T	A	BnaA04g00190D	-299	1	ATHB7	18	-	0.926	0.905	tttcAATAAtttt	Gain of TFBS
bna100550	A04	104084	T	A	BnaA04g00190D	-299	1	ATHB20	20	+	1	0.983	tcaATAATttt	Gain of TFBS
bna100550	A04	104084	T	A	BnaA04g00190D	-299	1	ZHD3	17	+	1	0.964	ttttcaATAATttt	Gain of TFBS
bna100550	A04	104084	T	A	BnaA04g00190D	-299	1	HAT5	22	-	1	0.991	aATAATtt	Gain of TFBS
bna100550	A04	104084	T	A	BnaA04g00190D	-299	1	ATHB40	13	-	0.968	0.886	tatattttcaaTAATTttttc	Gain of TFBS
bna100550	A04	104084	T	A	BnaA04g00190D	-299	1	ATHB40	17	+	1	0.94	ttttcAATAAttttttctaaa	Gain of TFBS
bna100613	A04	187027	G	T	BnaA04g00280D	2	0	ARR11	19	+	0.903	0.911	tAGATGcg	Loss of TFBS
bna100613	A04	187027	G	T	BnaA04g00280D	2	0	ARR14	20	+	0.964	0.954	aGATGCgt	Loss of TFBS
bna100613	A04	187027	G	T	BnaA04g00280D	2	0	OsRR22	19	+	0.914	0.893	taGATGCgtc	Loss of TFBS
bna100613	A04	187027	G	T	BnaA04g00280D	2	1	HSFC1	18	+	1	0.921	CTAGAtgcttc	Gain of TFBS
bna100613	A04	187027	G	T	BnaA04g00280D	2	1	HSFB2A	17	-	0.803	0.903	tcTAGATgcttc	Gain of TFBS
bna100614	A04	192268	A	C	BnaA04g00290D	-357	1	ARF10	17	-	1	0.884	cagGTCTCccggaat	Gain of TFBS
bna100633	A04	196801	C	A	BnaA04g00310D	-461	0	CBF4	17	+	1	0.93	aagcGTCGGcagt	Loss of TFBS
bna100633	A04	196801	C	A	BnaA04g00310D	-461	0	DREB1C	16	-	1	0.924	aaagcGTCGGcagta	Loss of TFBS
bna100633	A04	196801	C	A	BnaA04g00310D	-461	0	DREB1G	19	-	1	0.912	gcGTCGGcag	Loss of TFBS
bna100633	A04	196801	C	A	BnaA04g00310D	-461	0	ERF039	19	+	1	0.982	gcGTCGGcag	Loss of TFBS
bna100633	A04	196801	C	A	BnaA04g00310D	-461	0	ERF069	20	-	0.988	0.979	cgtCGGCAg	Loss of TFBS
bna100633	A04	196801	C	A	BnaA04g00310D	-461	0	ERF096	19	-	0.967	0.957	gcgTCGGCag	Loss of TFBS
bna100633	A04	196801	C	A	BnaA04g00310D	-461	0	ERF098	21	-	0.988	0.986	gTCGGCag	Loss of TFBS
bna100633	A04	196801	C	A	BnaA04g00310D	-461	0	ERF112	20	-	0.958	0.94	cgtCGGCAgt	Loss of TFBS
bna100633	A04	196801	C	A	BnaA04g00310D	-461	0	ERF13	20	-	0.963	0.948	cGTCGGca	Loss of TFBS
bna100633	A04	196801	C	A	BnaA04g00310D	-461	0	ERF7	18	-	0.986	0.971	agcgTCGGCa	Loss of TFBS
bna100633	A04	196801	C	A	BnaA04g00310D	-461	0	RAP210	17	+	1	0.926	aagcGTCGGcagtat	Loss of TFBS
bna100633	A04	196801	C	A	BnaA04g00310D	-461	0	RAP211	20	-	0.96	0.916	cGTCGGcagtatagc	Loss of TFBS
bna100634	A04	196861	C	G	BnaA04g00300D	68	0	CMTA2	23	-	0.948	0.941	ACACGcagg	Loss of TFBS
bna100634	A04	196861	C	G	BnaA04g00310D	-401	0	CMTA2	23	-	0.948	0.941	ACACGcagg	Loss of TFBS
bna100634	A04	196861	C	G	BnaA04g00300D	68	0	CMTA3	20	-	0.957	0.94	agcACACGc	Loss of TFBS
bna100634	A04	196861	C	G	BnaA04g00310D	-401	0	CMTA3	20	-	0.957	0.94	agcACACGc	Loss of TFBS
bna100635	A04	197242	A	T	BnaA04g00300D	-313	0	AIL7	20	-	0.846	0.904	ATTGGgattcg	Loss of TFBS
bna100635	A04	197242	A	T	BnaA04g00310D	-20	0	AIL7	20	-	0.846	0.904	ATTGGgattcg	Loss of TFBS
bna100636	A04	197320	G	C	BnaA04g00300D	-391	1	ERF017	21	+	0.986	0.91	cttGCCGGcgtgcc	Gain of TFBS
bna100636	A04	197320	G	C	BnaA04g00310D	58	1	ERF017	21	+	0.986	0.91	cttGCCGGcgtgcc	Gain of TFBS
bna100636	A04	197320	G	C	BnaA04g00300D	-391	1	ERF069	22	+	0.988	0.98	tTGCCGgcg	Gain of TFBS
bna100636	A04	197320	G	C	BnaA04g00310D	58	1	ERF069	22	+	0.988	0.98	tTGCCGgcg	Gain of TFBS
bna100636	A04	197320	G	C	BnaA04g00300D	-391	1	ERF069	23	-	1	0.993	tgcCGGCGt	Gain of TFBS
bna100636	A04	197320	G	C	BnaA04g00310D	58	1	ERF069	23	-	1	0.993	tgcCGGCGt	Gain of TFBS
bna100636	A04	197320	G	C	BnaA04g00300D	-391	1	ERF021	20	-	0.935	0.932	gcttGCCGGcgtgcc	Gain of TFBS
bna100636	A04	197320	G	C	BnaA04g00310D	58	1	ERF021	20	-	0.935	0.932	gcttGCCGGcgtgcc	Gain of TFBS
bna100636	A04	197320	G	C	BnaA04g00300D	-391	1	ERF13	23	-	0.967	0.973	tGCCGGcg	Gain of TFBS
bna100636	A04	197320	G	C	BnaA04g00310D	58	1	ERF13	23	-	0.967	0.973	tGCCGGcg	Gain of TFBS
bna100636	A04	197320	G	C	BnaA04g00300D	-391	1	ERF13	23	+	0.967	0.951	tgCCGGCg	Gain of TFBS
bna100636	A04	197320	G	C	BnaA04g00310D	58	1	ERF13	23	+	0.967	0.951	tgCCGGCg	Gain of TFBS
bna100636	A04	197320	G	C	BnaA04g00300D	-391	1	ERF105	23	+	1	1	tGCCGGcg	Gain of TFBS
bna100636	A04	197320	G	C	BnaA04g00310D	58	1	ERF105	23	+	1	1	tGCCGGcg	Gain of TFBS
bna100636	A04	197320	G	C	BnaA04g00300D	-391	1	ERF105	23	-	1	0.936	tgCCGGCg	Gain of TFBS
bna100636	A04	197320	G	C	BnaA04g00310D	58	1	ERF105	23	-	1	0.936	tgCCGGCg	Gain of TFBS
bna100636	A04	197320	G	C	BnaA04g00300D	-391	1	CRF4	24	-	1	0.92	gcCGGCGt	Gain of TFBS
bna100636	A04	197320	G	C	BnaA04g00310D	58	1	CRF4	24	-	1	0.92	gcCGGCGt	Gain of TFBS
bna100636	A04	197320	G	C	BnaA04g00300D	-391	1	RAP211	16	+	1	0.932	agttgcttgCCGGCg	Gain of TFBS
bna100636	A04	197320	G	C	BnaA04g00310D	58	1	RAP211	16	+	1	0.932	agttgcttgCCGGCg	Gain of TFBS
bna100636	A04	197320	G	C	BnaA04g00300D	-391	1	RAP211	23	-	1	0.929	tGCCGGcgtgccgtg	Gain of TFBS
bna100636	A04	197320	G	C	BnaA04g00310D	58	1	RAP211	23	-	1	0.929	tGCCGGcgtgccgtg	Gain of TFBS
bna100636	A04	197320	G	C	BnaA04g00300D	-391	1	ERF096	22	+	0.967	0.957	ttGCCGGcgt	Gain of TFBS
bna100636	A04	197320	G	C	BnaA04g00310D	58	1	ERF096	22	+	0.967	0.957	ttGCCGGcgt	Gain of TFBS
bna100636	A04	197320	G	C	BnaA04g00300D	-391	1	ERF096	22	-	0.967	0.973	ttgCCGGCgt	Gain of TFBS
bna100636	A04	197320	G	C	BnaA04g00310D	58	1	ERF096	22	-	0.967	0.973	ttgCCGGCgt	Gain of TFBS
bna100636	A04	197320	G	C	BnaA04g00300D	-391	1	AT4G16750	22	-	0.938	0.893	ttGCCGGcgtgccgt	Gain of TFBS
bna100636	A04	197320	G	C	BnaA04g00310D	58	1	AT4G16750	22	-	0.938	0.893	ttGCCGGcgtgccgt	Gain of TFBS
bna100636	A04	197320	G	C	BnaA04g00300D	-391	1	ERF098	24	-	0.987	0.988	gCCGGCgt	Gain of TFBS
bna100636	A04	197320	G	C	BnaA04g00310D	58	1	ERF098	24	-	0.987	0.988	gCCGGCgt	Gain of TFBS
bna100636	A04	197320	G	C	BnaA04g00300D	-391	1	ERF098	22	+	0.987	0.985	ttGCCGGc	Gain of TFBS
bna100636	A04	197320	G	C	BnaA04g00310D	58	1	ERF098	22	+	0.987	0.985	ttGCCGGc	Gain of TFBS
bna100636	A04	197320	G	C	BnaA04g00300D	-391	1	ERF008	23	-	1	0.957	tgcCGGCG	Gain of TFBS
bna100636	A04	197320	G	C	BnaA04g00310D	58	1	ERF008	23	-	1	0.957	tgcCGGCG	Gain of TFBS
bna100636	A04	197320	G	C	BnaA04g00300D	-391	1	ERF112	21	+	0.958	0.927	ctTGCCGgcg	Gain of TFBS
bna100636	A04	197320	G	C	BnaA04g00310D	58	1	ERF112	21	+	0.958	0.927	ctTGCCGgcg	Gain of TFBS
bna100636	A04	197320	G	C	BnaA04g00300D	-391	1	ERF112	23	-	1	0.971	tgcCGGCGtg	Gain of TFBS
bna100636	A04	197320	G	C	BnaA04g00310D	58	1	ERF112	23	-	1	0.971	tgcCGGCGtg	Gain of TFBS
bna100636	A04	197320	G	C	BnaA04g00300D	-391	1	ERF3	23	-	1	0.974	tgcCGGCG	Gain of TFBS
bna100636	A04	197320	G	C	BnaA04g00310D	58	1	ERF3	23	-	1	0.974	tgcCGGCG	Gain of TFBS
bna100636	A04	197320	G	C	BnaA04g00300D	-391	1	ERF4	21	-	1	0.931	cttgcCGGCGtg	Gain of TFBS
bna100636	A04	197320	G	C	BnaA04g00310D	58	1	ERF4	21	-	1	0.931	cttgcCGGCGtg	Gain of TFBS
bna100636	A04	197320	G	C	BnaA04g00300D	-391	1	ERF4	24	-	1	0.951	gcCGGCGt	Gain of TFBS
bna100636	A04	197320	G	C	BnaA04g00310D	58	1	ERF4	24	-	1	0.951	gcCGGCGt	Gain of TFBS
bna100636	A04	197320	G	C	BnaA04g00300D	-391	1	ERF6	22	-	1	0.983	ttgCCGGCgt	Gain of TFBS
bna100636	A04	197320	G	C	BnaA04g00310D	58	1	ERF6	22	-	1	0.983	ttgCCGGCgt	Gain of TFBS
bna100636	A04	197320	G	C	BnaA04g00300D	-391	1	ERF6	22	+	1	0.999	ttGCCGGcgt	Gain of TFBS
bna100636	A04	197320	G	C	BnaA04g00310D	58	1	ERF6	22	+	1	0.999	ttGCCGGcgt	Gain of TFBS
bna100636	A04	197320	G	C	BnaA04g00300D	-391	1	ERF7	21	-	0.985	0.986	cttgCCGGCg	Gain of TFBS
bna100636	A04	197320	G	C	BnaA04g00310D	58	1	ERF7	21	-	0.985	0.986	cttgCCGGCg	Gain of TFBS
bna100636	A04	197320	G	C	BnaA04g00300D	-391	1	ERF7	23	+	0.985	0.971	tGCCGGcgtg	Gain of TFBS
bna100636	A04	197320	G	C	BnaA04g00310D	58	1	ERF7	23	+	0.985	0.971	tGCCGGcgtg	Gain of TFBS
bna100636	A04	197320	G	C	BnaA04g00300D	-391	1	ERF8	21	-	1	0.99	cttgcCGGCG	Gain of TFBS
bna100636	A04	197320	G	C	BnaA04g00310D	58	1	ERF8	21	-	1	0.99	cttgcCGGCG	Gain of TFBS
bna100637	A04	197338	C	T	BnaA04g00300D	-409	0	ERF104	20	+	0.895	0.873	ctcttcccgcgCCGTCgag	Loss of TFBS
bna100637	A04	197338	C	T	BnaA04g00310D	76	0	ERF104	20	+	0.895	0.873	ctcttcccgcgCCGTCgag	Loss of TFBS
bna100638	A04	197388	C	A	BnaA04g00300D	-459	0	AIL7	21	+	0.893	0.886	caaatcTCTAG	Loss of TFBS
bna100638	A04	197388	C	A	BnaA04g00300D	-459	0	ARR10	20	-	0.996	0.981	acaAATCT	Loss of TFBS
bna100638	A04	197388	C	A	BnaA04g00300D	-459	1	LCL1	20	-	1	0.949	acaAATATct	Gain of TFBS
bna100638	A04	197388	C	A	BnaA04g00300D	-459	1	LHY1	20	-	1	0.982	acaaATATCt	Gain of TFBS
bna100638	A04	197388	C	A	BnaA04g00300D	-459	1	CCA1	22	+	1	1	aaATATCt	Gain of TFBS
bna100638	A04	197388	C	A	BnaA04g00300D	-459	1	AT3G10113	17	+	1	0.981	tctacaAATATctag	Gain of TFBS
bna100638	A04	197388	C	A	BnaA04g00300D	-459	1	ARR10	22	-	0.992	0.953	aaaTATCT	Gain of TFBS
bna100638	A04	197388	C	A	BnaA04g00300D	-459	1	At3g09600	18	-	1	0.972	ctacaAATATct	Gain of TFBS
bna100638	A04	197388	C	A	BnaA04g00300D	-459	1	RVE1	18	+	1	0.982	ctacaAATATctag	Gain of TFBS
bna100638	A04	197388	C	A	BnaA04g00300D	-459	1	RVE6	19	-	1	0.963	tacaAATATct	Gain of TFBS
bna100638	A04	197388	C	A	BnaA04g00300D	-459	1	RVE5	19	-	1	0.966	tacaaATATCt	Gain of TFBS
bna100638	A04	197388	C	A	BnaA04g00300D	-459	1	RVE7	19	+	1	0.973	tacaaATATCtaga	Gain of TFBS
bna100638	A04	197388	C	A	BnaA04g00300D	-459	1	EPR1	20	+	1	0.954	acaAATATctag	Gain of TFBS
bna100639	A04	198467	G	C	BnaA04g00320D	-467	0	ABF1	22	+	1	0.912	gaACGTGacaga	Loss of TFBS
bna100639	A04	198467	G	C	BnaA04g00320D	-467	0	ABI5	22	-	1	0.92	gaACGTGaca	Loss of TFBS
bna100639	A04	198467	G	C	BnaA04g00320D	-467	0	AREB3	17	+	1	0.878	aactggaACGTGaca	Loss of TFBS
bna100639	A04	198467	G	C	BnaA04g00320D	-467	0	BEE2	21	+	0.913	0.92	ggAACGTgac	Loss of TFBS
bna100639	A04	198467	G	C	BnaA04g00320D	-467	0	BEE2	21	-	1	0.92	ggaACGTGac	Loss of TFBS
bna100639	A04	198467	G	C	BnaA04g00320D	-467	0	GBF2	21	+	1	0.908	ggaACGTGacaga	Loss of TFBS
bna100656	A04	226719	T	C	BnaA04g00360D	-28	0	HSFC1	18	-	0.747	0.865	gaaggtTCTAA	Loss of TFBS
bna100656	A04	226719	T	C	BnaA04g00370D	-277	0	HSFC1	18	-	0.747	0.865	gaaggtTCTAA	Loss of TFBS
bna100657	A04	226730	T	G	BnaA04g00360D	-39	1	Glyma19g26560.1	19	+	0.837	0.873	tgggCCCGC	Gain of TFBS
bna100657	A04	226730	T	G	BnaA04g00370D	-266	1	Glyma19g26560.1	19	+	0.837	0.873	tgggCCCGC	Gain of TFBS
bna100658	A04	226787	C	G	BnaA04g00360D	-96	0	POPTR_0002s00440g	25	-	1	0.944	tCGTACc	Loss of TFBS
bna100658	A04	226787	C	G	BnaA04g00370D	-209	0	POPTR_0002s00440g	25	-	1	0.944	tCGTACc	Loss of TFBS
bna100658	A04	226787	C	G	BnaA04g00360D	-96	0	SMZ	23	+	1	0.87	agTCGTAc	Loss of TFBS
bna100658	A04	226787	C	G	BnaA04g00370D	-209	0	SMZ	23	+	1	0.87	agTCGTAc	Loss of TFBS
bna100658	A04	226787	C	G	BnaA04g00360D	-96	0	SPL12	24	-	1	0.982	gtCGTACc	Loss of TFBS
bna100658	A04	226787	C	G	BnaA04g00370D	-209	0	SPL12	24	-	1	0.982	gtCGTACc	Loss of TFBS
bna100658	A04	226787	C	G	BnaA04g00360D	-96	1	At1g72010	22	+	0.876	0.88	gaGTGGTacccgt	Gain of TFBS
bna100658	A04	226787	C	G	BnaA04g00370D	-209	1	At1g72010	22	+	0.876	0.88	gaGTGGTacccgt	Gain of TFBS
bna100658	A04	226787	C	G	BnaA04g00360D	-96	1	ARALYDRAFT_897773	24	-	1	0.91	GTGGTacccg	Gain of TFBS
bna100658	A04	226787	C	G	BnaA04g00370D	-209	1	ARALYDRAFT_897773	24	-	1	0.91	GTGGTacccg	Gain of TFBS
bna100658	A04	226787	C	G	BnaA04g00360D	-96	1	TCP16	24	+	0.797	0.875	gtgGTACCcg	Gain of TFBS
bna100658	A04	226787	C	G	BnaA04g00370D	-209	1	TCP16	24	+	0.797	0.875	gtgGTACCcg	Gain of TFBS
bna100658	A04	226787	C	G	BnaA04g00360D	-96	1	SPL8	21	-	0.98	0.89	cgagtgGTACCcgtta	Gain of TFBS
bna100658	A04	226787	C	G	BnaA04g00370D	-209	1	SPL8	21	-	0.98	0.89	cgagtgGTACCcgtta	Gain of TFBS
bna100658	A04	226787	C	G	BnaA04g00360D	-96	1	TCP19	24	-	0.916	0.926	GTGGTacccg	Gain of TFBS
bna100658	A04	226787	C	G	BnaA04g00370D	-209	1	TCP19	24	-	0.916	0.926	GTGGTacccg	Gain of TFBS
bna100658	A04	226787	C	G	BnaA04g00360D	-96	1	TCP21	23	+	0.869	0.873	aGTGGTacccgtta	Gain of TFBS
bna100658	A04	226787	C	G	BnaA04g00370D	-209	1	TCP21	23	+	0.869	0.873	aGTGGTacccgtta	Gain of TFBS
bna100658	A04	226787	C	G	BnaA04g00360D	-96	1	Glyma19g26560.1	24	-	0.846	0.879	GTGGTaccc	Gain of TFBS
bna100658	A04	226787	C	G	BnaA04g00370D	-209	1	Glyma19g26560.1	24	-	0.846	0.879	GTGGTaccc	Gain of TFBS
bna100658	A04	226787	C	G	BnaA04g00360D	-96	1	ARALYDRAFT_493022	24	-	0.959	0.92	GTGGTacc	Gain of TFBS
bna100658	A04	226787	C	G	BnaA04g00370D	-209	1	ARALYDRAFT_493022	24	-	0.959	0.92	GTGGTacc	Gain of TFBS
bna100658	A04	226787	C	G	BnaA04g00360D	-96	1	TCP8	24	-	0.946	0.952	GTGGTaccc	Gain of TFBS
bna100658	A04	226787	C	G	BnaA04g00370D	-209	1	TCP8	24	-	0.946	0.952	GTGGTaccc	Gain of TFBS
bna100660	A04	227148	C	T	BnaA04g00360D	-457	0	ARF34	17	+	1	0.867	tagAGACAgcgga	Loss of TFBS
bna100662	A04	227982	T	A	BnaA04g00380D	-412	0	AT2G20110	16	-	1	0.95	atacaaaatTTAAAt	Loss of TFBS
bna100662	A04	227982	T	A	BnaA04g00380D	-412	0	SOL1	23	-	1	0.909	atTTAAAtttaaaga	Loss of TFBS
bna100662	A04	227982	T	A	BnaA04g00380D	-412	0	TCX2	23	-	1	0.957	atttaAATTTaaaga	Loss of TFBS
bna100662	A04	227982	T	A	BnaA04g00380D	-412	0	TSO1	15	+	1	0.945	catacaaaatTTAAA	Loss of TFBS
bna100662	A04	227982	T	A	BnaA04g00380D	-412	0	TSO1	24	-	1	0.952	TTTAAatttaaagaa	Loss of TFBS
bna100662	A04	227982	T	A	BnaA04g00380D	-412	1	SOL1	22	+	1	0.91	aattaaaaTTTAAag	Gain of TFBS
bna100664	A04	228182	C	A	BnaA04g00380D	-212	1	EDT1	20	-	0.965	0.934	acATTTAtgg	Gain of TFBS
bna100665	A04	228387	G	C	BnaA04g00380D	-7	1	AT3G10580	12	+	1	0.902	atctttGATAAgaac	Gain of TFBS
bna100665	A04	228387	G	C	BnaA04g00380D	-7	1	BEE2	22	-	1	0.92	agaACGTGag	Gain of TFBS
bna100665	A04	228387	G	C	BnaA04g00380D	-7	1	BEE2	22	+	0.913	0.92	agAACGTgag	Gain of TFBS
bna100666	A04	228446	T	A	BnaA04g00380D	52	1	UIF1	25	+	1	0.998	aaaGATTCat	Gain of TFBS
bna100666	A04	228446	T	A	BnaA04g00380D	52	1	MYR2	23	-	1	0.976	ataaaGATTCattt	Gain of TFBS
bna100666	A04	228446	T	A	BnaA04g00380D	52	1	PBF	25	+	0.969	0.969	AAAGA	Gain of TFBS
bna100666	A04	228446	T	A	BnaA04g00380D	52	1	Dof2	25	+	0.965	0.964	AAAGAt	Gain of TFBS
bna100666	A04	228446	T	A	BnaA04g00380D	52	1	MNB1A	25	+	0.97	0.97	AAAGA	Gain of TFBS
bna100666	A04	228446	T	A	BnaA04g00380D	52	1	HHO3	23	-	1	0.968	ataaaGATTCa	Gain of TFBS
bna100666	A04	228446	T	A	BnaA04g00380D	52	1	HHO5	23	+	1	0.993	ataaaGATTCa	Gain of TFBS
bna100666	A04	228446	T	A	BnaA04g00380D	52	1	dof4.5	22	+	0.981	0.928	taTAAAGattcatt	Gain of TFBS
bna100666	A04	228446	T	A	BnaA04g00380D	52	1	PHL12	24	-	0.916	0.858	taAAGATtcatttc	Gain of TFBS
bna100666	A04	228446	T	A	BnaA04g00380D	52	1	AT2G40260	22	+	0.924	0.929	tataaagATTCAttt	Gain of TFBS
bna100675	A04	230245	T	C	BnaA04g00390D	-415	1	ARF27	22	+	1	0.948	tccccAGACAttc	Gain of TFBS
bna100675	A04	230245	T	C	BnaA04g00390D	-415	1	ARF34	24	+	1	0.872	cccAGACAttcca	Gain of TFBS
bna100676	A04	230270	T	C	BnaA04g00390D	-390	1	ARF16	18	-	1	0.957	caacTTGTCttgtt	Gain of TFBS
bna100676	A04	230270	T	C	BnaA04g00390D	-390	1	ANAC050	23	-	0.751	0.865	tgtcttgttgtGTAAG	Gain of TFBS
bna100676	A04	230270	T	C	BnaA04g00390D	-390	1	NAC062	21	+	0.974	0.855	cttgtcttgttgtgtAAGAAcagt	Gain of TFBS
bna100677	A04	230319	G	T	BnaA04g00390D	-341	1	GT-A3	22	-	1	0.934	acgatagaccACGTGag	Gain of TFBS
bna100678	A04	230412	A	C	BnaA04g00390D	-248	0	MYB113	23	-	1	0.908	ATAACgagttt	Loss of TFBS
bna100678	A04	230412	A	C	BnaA04g00390D	-248	0	MYB56	19	+	1	0.886	tcgtaTAACGagttt	Loss of TFBS
bna100682	A04	235962	T	G	BnaA04g00400D	-168	1	BIM1	18	-	0.966	0.968	agtCACGGga	Gain of TFBS
bna100682	A04	235962	T	G	BnaA04g00400D	-168	1	ARF39	22	+	1	0.942	acgGGAACaaag	Gain of TFBS
bna100692	A04	255359	G	A	BnaA04g00420D	23	0	ARF18	17	-	1	0.999	gttttTGTCGgag	Loss of TFBS
bna100692	A04	255359	G	A	BnaA04g00420D	23	0	ARF2	20	-	1	0.995	ttTGTCGgag	Loss of TFBS
bna100692	A04	255359	G	A	BnaA04g00420D	23	0	ARF29	18	-	1	0.94	ttttTGTCGgagtgg	Loss of TFBS
bna100692	A04	255359	G	A	BnaA04g00420D	23	0	ARF3	22	+	1	0.987	tGTCGGag	Loss of TFBS
bna100692	A04	255359	G	A	BnaA04g00420D	23	0	ARF35	18	-	1	0.973	ttttTGTCGgagtg	Loss of TFBS
bna100692	A04	255359	G	A	BnaA04g00420D	23	0	ARF5	21	-	1	0.987	ttGTCGGa	Loss of TFBS
bna100692	A04	255359	G	A	BnaA04g00420D	23	0	ARF8	20	+	1	1	ttTGTCGga	Loss of TFBS
bna100692	A04	255359	G	A	BnaA04g00420D	23	0	AT2G44940	19	+	1	0.906	ttttGTCGGagtggt	Loss of TFBS
bna100692	A04	255359	G	A	BnaA04g00420D	23	0	AT4G16750	21	-	1	0.924	ttGTCGGagtggtaa	Loss of TFBS
bna100692	A04	255359	G	A	BnaA04g00420D	23	0	CBF1	20	-	1	0.929	tttGTCGGagtg	Loss of TFBS
bna100692	A04	255359	G	A	BnaA04g00420D	23	0	CBF4	19	+	1	0.915	ttttGTCGGagtg	Loss of TFBS
bna100692	A04	255359	G	A	BnaA04g00420D	23	0	DREB1A	21	+	1	0.943	ttGTCGGagt	Loss of TFBS
bna100692	A04	255359	G	A	BnaA04g00420D	23	0	DREB1C	18	-	1	0.906	tttttGTCGGagtgg	Loss of TFBS
bna100692	A04	255359	G	A	BnaA04g00420D	23	0	ERF017	20	+	0.993	0.91	tttGTCGGagtggt	Loss of TFBS
bna100692	A04	255359	G	A	BnaA04g00420D	23	0	ERF021	19	-	1	0.935	ttttGTCGGagtggt	Loss of TFBS
bna100692	A04	255359	G	A	BnaA04g00420D	23	0	ERF027	21	-	1	0.931	ttGTCGGagtggtaacggtat	Loss of TFBS
bna100692	A04	255359	G	A	BnaA04g00420D	23	0	ERF027	18	-	1	0.952	tttttGTCGGagtgg	Loss of TFBS
bna100692	A04	255359	G	A	BnaA04g00420D	23	0	ERF037	17	-	1	0.92	gtttttGTCGGagt	Loss of TFBS
bna100692	A04	255359	G	A	BnaA04g00420D	23	0	ERF039	20	-	1	0.965	tttGTCGGagt	Loss of TFBS
bna100692	A04	255359	G	A	BnaA04g00420D	23	0	ERF043	22	+	1	0.929	tGTCGGag	Loss of TFBS
bna100692	A04	255359	G	A	BnaA04g00420D	23	0	PHYPADRAFT_28324	22	+	1	0.917	tGTCGGag	Loss of TFBS
bna100692	A04	255359	G	A	BnaA04g00420D	23	0	RAP2-10	19	-	1	0.964	ttttGTCGGagt	Loss of TFBS
bna100692	A04	255359	G	A	BnaA04g00420D	23	0	RAP210	19	+	1	0.908	ttttGTCGGagtggt	Loss of TFBS
bna100692	A04	255359	G	A	BnaA04g00420D	23	0	TINY	18	-	1	0.923	tttttGTCGGagtgg	Loss of TFBS
bna100693	A04	255500	C	G	BnaA04g00420D	-118	0	WRKY15	15	+	1	0.988	atgtcgGTCAAcgcca	Loss of TFBS
bna100693	A04	255500	C	G	BnaA04g00420D	-118	0	WRKY21	18	+	1	1	tcgGTCAAcg	Loss of TFBS
bna100693	A04	255500	C	G	BnaA04g00420D	-118	0	WRKY23	20	+	1	0.964	gGTCAAcg	Loss of TFBS
bna100693	A04	255500	C	G	BnaA04g00420D	-118	0	WRKY24	15	-	1	0.866	atgtcgGTCAAcgc	Loss of TFBS
bna100693	A04	255500	C	G	BnaA04g00420D	-118	0	WRKY28	18	+	1	0.989	tcgGTCAAcgc	Loss of TFBS
bna100693	A04	255500	C	G	BnaA04g00420D	-118	0	WRKY30	20	+	1	1	gGTCAAcgcc	Loss of TFBS
bna100693	A04	255500	C	G	BnaA04g00420D	-118	0	WRKY31	9	+	1	0.937	ttgatgatgtcgGTCAAcg	Loss of TFBS
bna100693	A04	255500	C	G	BnaA04g00420D	-118	0	WRKY42	17	-	1	0.957	gtcgGTCAAcgccacgtggaa	Loss of TFBS
bna100693	A04	255500	C	G	BnaA04g00420D	-118	0	WRKY55	18	-	1	0.917	tcgGTCAAcgcc	Loss of TFBS
bna100693	A04	255500	C	G	BnaA04g00420D	-118	0	WRKY57	18	+	1	0.984	tcgGTCAAcg	Loss of TFBS
bna100693	A04	255500	C	G	BnaA04g00420D	-118	0	WRKY6	9	-	1	0.948	ttgatgatgtcgGTCAAcg	Loss of TFBS
bna100693	A04	255500	C	G	BnaA04g00420D	-118	0	WRKY62	19	+	1	0.952	cgGTCAAc	Loss of TFBS
bna100693	A04	255500	C	G	BnaA04g00420D	-118	0	WRKY65	17	+	1	0.899	gtcgGTCAAcg	Loss of TFBS
bna100693	A04	255500	C	G	BnaA04g00420D	-118	1	AREB3	23	+	1	0.865	caaggccACGTGgaa	Gain of TFBS
bna100694	A04	255515	T	C	BnaA04g00420D	-133	0	GT-A3	12	+	1	0.91	gcCACGTggaagtatcc	Loss of TFBS
bna100694	A04	255515	T	C	BnaA04g00420D	-133	1	SPL9	19	-	0.993	0.945	ggaAGTACccc	Gain of TFBS
bna100694	A04	255515	T	C	BnaA04g00420D	-133	1	SPL8	17	+	0.981	0.93	gtggaAGTACccctta	Gain of TFBS
bna100694	A04	255515	T	C	BnaA04g00420D	-133	1	SPL8	17	-	0.98	0.911	gtggaaGTACCcctta	Gain of TFBS
bna100722	A04	259057	C	T	BnaA04g00440D	-460	1	PBF	23	-	1	1	GCTTT	Gain of TFBS
bna100722	A04	259057	C	T	BnaA04g00440D	-460	1	Dof2	22	-	1	1	gGCTTT	Gain of TFBS
bna100722	A04	259057	C	T	BnaA04g00440D	-460	1	Dof3	22	-	1	0.993	gGCTTT	Gain of TFBS
bna100722	A04	259057	C	T	BnaA04g00440D	-460	1	MNB1A	23	-	1	1	GCTTT	Gain of TFBS
bna100723	A04	259074	G	A	BnaA04g00440D	-443	0	TCP20	21	-	1	0.902	gaGTGGGgct	Loss of TFBS
bna100723	A04	259074	G	A	BnaA04g00440D	-443	0	TCP7	23	+	1	0.851	GTGGGgctcaa	Loss of TFBS
bna100723	A04	259074	G	A	BnaA04g00440D	-443	1	AT3G46070	18	-	1	0.972	ttggAGTGAggctca	Gain of TFBS
bna100724	A04	259155	A	G	BnaA04g00440D	-362	0	SPL8	18	+	1	0.92	tcgcaTGTACaactat	Loss of TFBS
bna100724	A04	259155	A	G	BnaA04g00440D	-362	0	SPL8	18	-	1	0.899	tcgcatGTACAactat	Loss of TFBS
bna100724	A04	259155	A	G	BnaA04g00440D	-362	0	SPL9	20	-	0.953	0.941	gcaTGTACaac	Loss of TFBS
bna100724	A04	259155	A	G	BnaA04g00440D	-362	0	SPL9	21	+	0.953	0.933	catGTACAact	Loss of TFBS
bna100724	A04	259155	A	G	BnaA04g00440D	-362	1	BHLH78	20	-	0.8	0.875	gcaTGTGC	Gain of TFBS
bna100724	A04	259155	A	G	BnaA04g00440D	-362	1	BHLH78	20	+	0.8	0.875	GCATGtgc	Gain of TFBS
bna100724	A04	259155	A	G	BnaA04g00440D	-362	1	AIB	20	+	0.839	0.895	gCATGTgc	Gain of TFBS
bna100724	A04	259155	A	G	BnaA04g00440D	-362	1	AIB	20	-	0.839	0.895	gcATGTGc	Gain of TFBS
bna100726	A04	259318	G	C	BnaA04g00440D	-199	1	CMTA3	20	-	0.957	0.933	gctACACGa	Gain of TFBS
bna100726	A04	259318	G	C	BnaA04g00440D	-199	1	NAC055	23	+	0.908	0.935	acACGAAa	Gain of TFBS
bna100727	A04	259429	G	C	BnaA04g00440D	-88	0	At1g19000	22	+	1	0.952	tcatGGATAagcat	Loss of TFBS
bna100727	A04	259429	G	C	BnaA04g00440D	-88	0	At1g74840	23	+	1	0.965	catGGATAagc	Loss of TFBS
bna100727	A04	259429	G	C	BnaA04g00440D	-88	0	AT5G56840	21	-	1	0.923	ctcatgGATAAgcat	Loss of TFBS
bna100727	A04	259429	G	C	BnaA04g00440D	-88	0	AT5G61620	21	+	1	0.936	ctcatGGATAagcat	Loss of TFBS
bna100727	A04	259429	G	C	BnaA04g00440D	-88	0	KUA1	23	-	1	0.95	catgGATAAgcatca	Loss of TFBS
bna100749	A04	264779	C	G	BnaA04g00450D	-239	1	Dof2	23	+	0.961	0.961	AAAGGt	Gain of TFBS
bna100749	A04	264779	C	G	BnaA04g00450D	-239	1	PBF	23	+	0.969	0.969	AAAGG	Gain of TFBS
bna100749	A04	264779	C	G	BnaA04g00450D	-239	1	AT3G52440	20	+	0.981	0.956	caTAAAGgtat	Gain of TFBS
bna100750	A04	264904	A	G	BnaA04g00450D	-364	1	DREB1A	21	-	1	0.931	cttCCGACta	Gain of TFBS
bna100750	A04	264904	A	G	BnaA04g00450D	-364	1	CBF1	20	+	1	0.904	tcttCCGACtaa	Gain of TFBS
bna100751	A04	264924	C	T	BnaA04g00450D	-384	1	PBF	22	-	0.969	0.969	CCTTT	Gain of TFBS
bna100751	A04	264924	C	T	BnaA04g00450D	-384	1	Dof2	21	-	0.961	0.961	aCCTTT	Gain of TFBS
bna100752	A04	264950	C	A	BnaA04g00450D	-410	0	LEC2	24	+	1	0.945	ttCATGCtcct	Loss of TFBS
bna100752	A04	264950	C	A	BnaA04g00450D	-410	1	EDT1	21	+	1	0.964	gctTTAATgc	Gain of TFBS
bna100753	A04	264960	G	A	BnaA04g00450D	-420	0	ARALYDRAFT_493022	26	-	0.917	0.946	GTGGAccc	Loss of TFBS
bna100753	A04	264960	G	A	BnaA04g00450D	-420	0	ARALYDRAFT_897773	26	-	0.887	0.925	GTGGAcccaa	Loss of TFBS
bna100753	A04	264960	G	A	BnaA04g00450D	-420	0	At1g72010	24	+	0.885	0.876	tgGTGGAcccaag	Loss of TFBS
bna100753	A04	264960	G	A	BnaA04g00450D	-420	0	Glyma19g26560.1	26	-	0.847	0.881	GTGGAccca	Loss of TFBS
bna100753	A04	264960	G	A	BnaA04g00450D	-420	0	OsI_08196	26	-	0.866	0.91	GTGGAccc	Loss of TFBS
bna100753	A04	264960	G	A	BnaA04g00450D	-420	0	TCP15	26	-	0.822	0.882	GTGGAccc	Loss of TFBS
bna100753	A04	264960	G	A	BnaA04g00450D	-420	0	TCP17	26	+	0.898	0.878	gtgGACCCaag	Loss of TFBS
bna100753	A04	264960	G	A	BnaA04g00450D	-420	0	TCP19	26	-	0.919	0.929	GTGGAcccaa	Loss of TFBS
bna100753	A04	264960	G	A	BnaA04g00450D	-420	0	TCP21	25	+	0.878	0.875	gGTGGAcccaaggg	Loss of TFBS
bna100753	A04	264960	G	A	BnaA04g00450D	-420	0	TCP23	26	-	0.8	0.868	GTGGAccc	Loss of TFBS
bna100753	A04	264960	G	A	BnaA04g00450D	-420	0	TCP24	25	-	0.876	0.917	ggtGGACCcaag	Loss of TFBS
bna100753	A04	264960	G	A	BnaA04g00450D	-420	0	TCP3	24	-	0.884	0.923	tggtGGACCcaag	Loss of TFBS
bna100753	A04	264960	G	A	BnaA04g00450D	-420	0	TCP4	26	-	0.877	0.919	gtGGACCc	Loss of TFBS
bna100753	A04	264960	G	A	BnaA04g00450D	-420	0	TCP8	26	-	0.942	0.953	GTGGAccca	Loss of TFBS
bna100754	A04	264997	A	G	BnaA04g00450D	-457	0	AGL55	24	+	1	1	tCACCA	Loss of TFBS
bna100754	A04	264997	A	G	BnaA04g00450D	-457	0	bZIP911	17	-	0.8	0.868	gaccaTGTCAcc	Loss of TFBS
bna100754	A04	264997	A	G	BnaA04g00450D	-457	1	DRE1C	21	+	1	0.862	ATGTCgcc	Gain of TFBS
bna100754	A04	264997	A	G	BnaA04g00450D	-457	1	ARF8	20	+	1	0.956	caTGTCGcc	Gain of TFBS
bna100754	A04	264997	A	G	BnaA04g00450D	-457	1	DREB1E	21	+	1	0.917	aTGTCGcc	Gain of TFBS
bna100755	A04	265033	C	A	BnaA04g00450D	-493	1	TCX2	21	-	1	0.97	ttttaAATTTccaat	Gain of TFBS
bna100755	A04	265033	C	A	BnaA04g00450D	-493	1	TSO1	22	-	1	0.964	TTTAAatttccaatc	Gain of TFBS
bna100755	A04	265033	C	A	BnaA04g00450D	-493	1	SOL1	21	-	1	0.944	ttTTAAAtttccaat	Gain of TFBS
bna100781	A04	271542	T	A	BnaA04g00460D	-45	0	ATHB-16	20	+	0.96	0.973	tAATTAtt	Loss of TFBS
bna100781	A04	271542	T	A	BnaA04g00460D	-45	0	ATHB-16	21	-	1	0.953	aaTTATTt	Loss of TFBS
bna100781	A04	271542	T	A	BnaA04g00460D	-45	0	ATHB-5	19	+	1	0.936	ttaATTATt	Loss of TFBS
bna100781	A04	271542	T	A	BnaA04g00460D	-45	0	ATHB18	19	+	0.991	0.966	ttaATTATtta	Loss of TFBS
bna100781	A04	271542	T	A	BnaA04g00460D	-45	0	ATHB20	19	-	1	0.983	ttaATTATtta	Loss of TFBS
bna100781	A04	271542	T	A	BnaA04g00460D	-45	0	ATHB4	20	+	0.985	0.95	taATTATtta	Loss of TFBS
bna100781	A04	271542	T	A	BnaA04g00460D	-45	0	ATHB40	12	-	1	0.88	aaaggaattaaTTATTtattt	Loss of TFBS
bna100781	A04	271542	T	A	BnaA04g00460D	-45	0	ATHB53	19	-	1	0.953	ttaaTTATTta	Loss of TFBS
bna100781	A04	271542	T	A	BnaA04g00460D	-45	0	HAT5	20	+	1	0.993	taATTATt	Loss of TFBS
bna100781	A04	271542	T	A	BnaA04g00460D	-45	1	ATHB4	24	+	0.985	0.95	taATTATtta	Gain of TFBS
bna100781	A04	271542	T	A	BnaA04g00460D	-45	1	ATHB34	24	-	1	0.946	tAATTAtttatttat	Gain of TFBS
bna100781	A04	271542	T	A	BnaA04g00460D	-45	1	HDG1	20	-	1	0.927	taATTAAttat	Gain of TFBS
bna100781	A04	271542	T	A	BnaA04g00460D	-45	1	ATHB-16	24	+	0.96	0.973	tAATTAtt	Gain of TFBS
bna100781	A04	271542	T	A	BnaA04g00460D	-45	1	ATHB-16	25	-	1	0.953	aaTTATTt	Gain of TFBS
bna100781	A04	271542	T	A	BnaA04g00460D	-45	1	ATHB40	16	-	1	0.877	gaattaattaaTTATTtattt	Gain of TFBS
bna100781	A04	271542	T	A	BnaA04g00460D	-45	1	ATHB53	23	-	1	0.953	ttaaTTATTta	Gain of TFBS
bna100781	A04	271542	T	A	BnaA04g00460D	-45	1	ZHD1	15	-	1	0.977	ggaattAATTAatta	Gain of TFBS
bna100781	A04	271542	T	A	BnaA04g00460D	-45	1	ZHD1	21	-	1	0.993	aattAATTAttta	Gain of TFBS
bna100781	A04	271542	T	A	BnaA04g00460D	-45	1	ZHD1	20	+	1	0.992	taatTAATTatttat	Gain of TFBS
bna100781	A04	271542	T	A	BnaA04g00460D	-45	1	HAT5	24	+	1	0.993	taATTATt	Gain of TFBS
bna100781	A04	271542	T	A	BnaA04g00460D	-45	1	ZHD5	22	-	1	0.979	aTTAATtattt	Gain of TFBS
bna100781	A04	271542	T	A	BnaA04g00460D	-45	1	ZHD5	17	+	1	0.967	aattaATTAAt	Gain of TFBS
bna100781	A04	271542	T	A	BnaA04g00460D	-45	1	ZHD6	20	-	1	0.985	taatTAATTatttat	Gain of TFBS
bna100781	A04	271542	T	A	BnaA04g00460D	-45	1	ZHD6	15	+	1	0.948	ggaattAATTAatta	Gain of TFBS
bna100781	A04	271542	T	A	BnaA04g00460D	-45	1	AHL25	21	-	1	1	aatTAATT	Gain of TFBS
bna100781	A04	271542	T	A	BnaA04g00460D	-45	1	AHL25	21	+	1	1	AATTAatt	Gain of TFBS
bna100781	A04	271542	T	A	BnaA04g00460D	-45	1	OBP1	10	-	1	0.919	tAAAAGgaattaattaattat	Gain of TFBS
bna100781	A04	271542	T	A	BnaA04g00460D	-45	1	ATHB18	23	+	0.991	0.966	ttaATTATtta	Gain of TFBS
bna100781	A04	271542	T	A	BnaA04g00460D	-45	1	ATHB-5	23	+	1	0.936	ttaATTATt	Gain of TFBS
bna100781	A04	271542	T	A	BnaA04g00460D	-45	1	ATHB20	23	-	1	0.983	ttaATTATtta	Gain of TFBS
bna100781	A04	271542	T	A	BnaA04g00460D	-45	1	ATHB23	19	+	1	1	ttAATTAatt	Gain of TFBS
bna100781	A04	271542	T	A	BnaA04g00460D	-45	1	ATHB23	21	-	1	0.997	aatTAATTat	Gain of TFBS
bna100806	A04	360259	C	A	BnaA04g00490D	67	1	ATHB-16	25	-	0.984	0.952	aaTGATTg	Gain of TFBS
bna100806	A04	360259	C	A	BnaA04g00490D	67	1	ATHB40	16	-	0.946	0.885	cctctcaggaaTGATTgtatc	Gain of TFBS
bna100806	A04	360259	C	A	BnaA04g00490D	67	1	HAT22	25	-	1	0.99	aaTGATTgta	Gain of TFBS
bna100806	A04	360259	C	A	BnaA04g00490D	67	1	ATHB18	23	-	1	0.987	ggaATGATtgt	Gain of TFBS
bna100806	A04	360259	C	A	BnaA04g00490D	67	1	ATHB-5	23	+	0.987	0.931	ggaATGATt	Gain of TFBS
bna100806	A04	360259	C	A	BnaA04g00490D	67	1	ATHB-5	23	-	1	0.996	ggaaTGATTgta	Gain of TFBS
bna100806	A04	360259	C	A	BnaA04g00490D	67	1	ATHB-5	25	-	0.981	0.976	aATGATtgt	Gain of TFBS
bna100806	A04	360259	C	A	BnaA04g00490D	67	1	HAT1	24	-	1	0.997	gaaTGATTgt	Gain of TFBS
bna100806	A04	360259	C	A	BnaA04g00490D	67	1	HAT2	24	-	1	0.976	gaaTGATTgta	Gain of TFBS
bna100806	A04	360259	C	A	BnaA04g00490D	67	1	ZHD3	23	-	0.97	0.941	ggaATGATtgtatc	Gain of TFBS
bna100806	A04	360259	C	A	BnaA04g00490D	67	1	ATHB4	24	+	0.999	0.96	gaATGATtgt	Gain of TFBS
bna100806	A04	360259	C	A	BnaA04g00490D	67	1	ATHB4	23	-	1	0.949	ggaATGATtg	Gain of TFBS
bna100806	A04	360259	C	A	BnaA04g00490D	67	1	ATHB7	23	+	1	0.945	ggaaTGATTgtat	Gain of TFBS
bna100806	A04	360259	C	A	BnaA04g00490D	67	1	ATHB-51	25	+	0.931	0.95	aATGATtg	Gain of TFBS
bna100807	A04	360265	G	T	BnaA04g00490D	61	0	ATHB-12	19	+	1	0.945	acTGATTg	Loss of TFBS
bna100807	A04	360265	G	T	BnaA04g00490D	61	1	AT5G56840	22	+	1	0.888	gattTTATCcccagc	Gain of TFBS
bna100807	A04	360265	G	T	BnaA04g00490D	61	1	At5g08520	24	-	1	0.887	ttTTATCcccagc	Gain of TFBS
bna100807	A04	360265	G	T	BnaA04g00490D	61	1	KUA1	20	+	1	0.921	ctgattTTATCccca	Gain of TFBS
bna100807	A04	360265	G	T	BnaA04g00490D	61	1	AT3G10580	22	-	1	0.906	gattTTATCcccagc	Gain of TFBS
bna100807	A04	360265	G	T	BnaA04g00490D	61	1	AT-GTL1	22	-	0.836	0.891	gattTTATCccc	Gain of TFBS
bna100807	A04	360265	G	T	BnaA04g00490D	61	1	At5g58900	20	-	1	0.922	ctgattTTATCccca	Gain of TFBS
bna100809	A04	360377	C	A	BnaA04g00490D	-51	0	ERF069	22	+	0.989	0.978	gAGCCGttt	Loss of TFBS
bna100809	A04	360377	C	A	BnaA04g00490D	-51	0	MYB1	21	+	1	0.88	agagCCGTTtgaaacctcc	Loss of TFBS
bna10081	A01	6393490	A	C	BnaA01g12780D	-182	0	AT1G76880	18	+	1	0.962	aaaGTAAAaatgtttt	Loss of TFBS
bna10081	A01	6393490	A	C	BnaA01g12780D	-182	0	GT-2	15	-	1	0.953	tctaaaGTAAAaat	Loss of TFBS
bna100814	A04	386312	T	C	BnaA04g00510D	-14	0	AT3G45610	18	+	1	0.929	tcacCTTTTtctctctgct	Loss of TFBS
bna100814	A04	386312	T	C	BnaA04g00510D	-14	0	AT3G52440	18	-	1	0.962	tcacCTTTTtc	Loss of TFBS
bna100814	A04	386312	T	C	BnaA04g00510D	-14	0	DAG2	18	-	1	0.955	tcacCTTTTtc	Loss of TFBS
bna100814	A04	386312	T	C	BnaA04g00510D	-14	0	dof4.2	14	-	1	0.944	acactcacCTTTTtctctc	Loss of TFBS
bna100814	A04	386312	T	C	BnaA04g00510D	-14	0	OBP4	15	-	1	0.946	cactcacCTTTTtc	Loss of TFBS
bna10083	A01	6393577	T	A	BnaA01g12780D	-269	0	ATHB-12	21	+	1	1	aaTGATTg	Loss of TFBS
bna10083	A01	6393577	T	A	BnaA01g12780D	-269	0	ATHB-16	21	-	0.984	0.952	aaTGATTg	Loss of TFBS
bna10083	A01	6393577	T	A	BnaA01g12780D	-269	0	ATHB-5	19	-	1	1	aaaaTGATTgat	Loss of TFBS
bna10083	A01	6393577	T	A	BnaA01g12780D	-269	0	ATHB-5	21	-	0.981	0.978	aATGATtga	Loss of TFBS
bna10083	A01	6393577	T	A	BnaA01g12780D	-269	0	ATHB-51	21	+	0.931	0.95	aATGATtg	Loss of TFBS
bna10083	A01	6393577	T	A	BnaA01g12780D	-269	0	ATHB18	19	-	1	0.995	aaaATGATtga	Loss of TFBS
bna10083	A01	6393577	T	A	BnaA01g12780D	-269	0	ATHB4	19	-	1	0.951	aaaATGATtg	Loss of TFBS
bna10083	A01	6393577	T	A	BnaA01g12780D	-269	0	ATHB4	20	+	0.999	0.959	aaATGATtga	Loss of TFBS
bna10083	A01	6393577	T	A	BnaA01g12780D	-269	0	ATHB40	12	-	0.946	0.916	ccgttttaaaaTGATTgattt	Loss of TFBS
bna10083	A01	6393577	T	A	BnaA01g12780D	-269	0	ATHB7	19	+	1	0.96	aaaaTGATTgatt	Loss of TFBS
bna10083	A01	6393577	T	A	BnaA01g12780D	-269	0	HAT1	20	-	1	0.997	aaaTGATTga	Loss of TFBS
bna10083	A01	6393577	T	A	BnaA01g12780D	-269	0	HAT2	20	-	1	0.984	aaaTGATTgat	Loss of TFBS
bna10083	A01	6393577	T	A	BnaA01g12780D	-269	0	HAT22	21	-	1	0.993	aaTGATTgat	Loss of TFBS
bna10083	A01	6393577	T	A	BnaA01g12780D	-269	0	ZHD3	19	-	0.97	0.963	aaaATGATtgattt	Loss of TFBS
bna10083	A01	6393577	T	A	BnaA01g12780D	-269	1	ATHB-5	23	+	0.987	0.93	tgaATGATt	Gain of TFBS
bna10083	A01	6393577	T	A	BnaA01g12780D	-269	1	ATHB-5	23	-	1	0.948	tgaaTGATTttt	Gain of TFBS
bna10083	A01	6393577	T	A	BnaA01g12780D	-269	1	ATHB-12	25	+	1	0.922	aaTGATTt	Gain of TFBS
bna10083	A01	6393577	T	A	BnaA01g12780D	-269	1	HAT1	24	-	1	0.98	gaaTGATTtt	Gain of TFBS
bna10083	A01	6393577	T	A	BnaA01g12780D	-269	1	HAT22	25	-	1	0.964	aaTGATTttt	Gain of TFBS
bna10083	A01	6393577	T	A	BnaA01g12780D	-269	1	ATHB4	24	+	0.999	0.923	gaATGATttt	Gain of TFBS
bna10083	A01	6393577	T	A	BnaA01g12780D	-269	1	EDT1	20	+	0.929	0.926	aaaTGAATga	Gain of TFBS
bna10084	A01	6393709	A	G	BnaA01g12780D	-401	0	Dof2	25	+	0.961	0.961	AAAGTt	Loss of TFBS
bna10084	A01	6393709	A	G	BnaA01g12780D	-401	0	Dof3	25	+	0.994	0.971	AAAGTt	Loss of TFBS
bna10084	A01	6393709	A	G	BnaA01g12780D	-401	0	MNB1A	25	+	0.97	0.97	AAAGT	Loss of TFBS
bna10084	A01	6393709	A	G	BnaA01g12780D	-401	0	PBF	25	+	0.985	0.985	AAAGT	Loss of TFBS
bna10084	A01	6393709	A	G	BnaA01g12780D	-401	1	MYB56	16	+	0.943	0.91	aatttTAACAgagtt	Gain of TFBS
bna10084	A01	6393709	A	G	BnaA01g12780D	-401	1	MYB1	12	-	0.933	0.876	aattaattttAACAGagtt	Gain of TFBS
bna10084	A01	6393709	A	G	BnaA01g12780D	-401	1	AT3G10030	18	+	1	0.999	ttTTAACagagtt	Gain of TFBS
bna10084	A01	6393709	A	G	BnaA01g12780D	-401	1	MYB73	21	+	0.982	0.934	tAACAGagttt	Gain of TFBS
bna10084	A01	6393709	A	G	BnaA01g12780D	-401	1	MYB77	21	-	0.97	0.922	tAACAGagtttacaa	Gain of TFBS
bna10084	A01	6393709	A	G	BnaA01g12780D	-401	1	MYB33	20	+	0.986	0.959	tTAACAgagtt	Gain of TFBS
bna10084	A01	6393709	A	G	BnaA01g12780D	-401	1	MYB81	20	+	0.998	0.971	ttAACAGagtt	Gain of TFBS
bna100849	A04	419859	A	T	BnaA04g00530D	-174	0	ATHB15	13	+	1	0.958	tttcgtaATGATgat	Loss of TFBS
bna100849	A04	419859	A	T	BnaA04g00530D	-174	0	HAT1	21	-	1	0.97	tgaTGATTtt	Loss of TFBS
bna100849	A04	419859	A	T	BnaA04g00530D	-174	1	GT-2	25	+	1	0.947	gttTTTACtttgta	Gain of TFBS
bna100851	A04	419952	G	C	BnaA04g00530D	-81	1	AGL25	21	+	1	0.862	ccTTTCCctttatatgct	Gain of TFBS
bna100851	A04	419952	G	C	BnaA04g00530D	-81	1	AP1	23	-	0.912	0.919	tttcccTTTATat	Gain of TFBS
bna100852	A04	420031	C	G	BnaA04g00530D	-2	1	POPTR_0002s00440g	25	+	0.927	0.932	aGTATGg	Gain of TFBS
bna100888	A04	433104	G	A	BnaA04g00550D	26	0	CMTA3	24	+	0.936	0.919	gCGAGTtcc	Loss of TFBS
bna100889	A04	433112	C	A	BnaA04g00550D	18	1	MYB62	20	-	1	0.916	gttCCTAAttggtga	Gain of TFBS
bna100892	A04	435378	A	G	BnaA04g00570D	-473	0	ATHB-12	21	-	1	0.914	gAATCAtt	Loss of TFBS
bna100892	A04	435378	A	G	BnaA04g00570D	-473	0	ATHB-12	22	+	0.965	0.97	aaTCATTg	Loss of TFBS
bna100892	A04	435378	A	G	BnaA04g00570D	-473	0	ATHB-5	19	+	1	0.941	aggAATCAttgt	Loss of TFBS
bna100892	A04	435378	A	G	BnaA04g00570D	-473	0	ATHB-5	20	+	0.981	0.927	ggaATCATt	Loss of TFBS
bna100892	A04	435378	A	G	BnaA04g00570D	-473	0	ATHB-5	22	-	0.987	0.981	aATCATtgt	Loss of TFBS
bna100892	A04	435378	A	G	BnaA04g00570D	-473	0	ATHB-51	22	+	0.932	0.95	aATCATtg	Loss of TFBS
bna100892	A04	435378	A	G	BnaA04g00570D	-473	0	ATHB18	20	+	1	0.946	ggaATCATtgt	Loss of TFBS
bna100892	A04	435378	A	G	BnaA04g00570D	-473	0	ATHB18	20	-	0.961	0.961	ggaATCATtgt	Loss of TFBS
bna100892	A04	435378	A	G	BnaA04g00570D	-473	0	ATHB4	20	-	0.999	0.948	ggaATCATtg	Loss of TFBS
bna100892	A04	435378	A	G	BnaA04g00570D	-473	0	ATHB4	21	+	1	0.96	gaATCATtgt	Loss of TFBS
bna100892	A04	435378	A	G	BnaA04g00570D	-473	0	ATHB40	13	-	0.947	0.894	atttgtaggaaTCATTgtgaa	Loss of TFBS
bna100892	A04	435378	A	G	BnaA04g00570D	-473	0	HAT1	20	+	1	0.983	ggAATCAttg	Loss of TFBS
bna100892	A04	435378	A	G	BnaA04g00570D	-473	0	HAT22	19	+	1	0.961	aggAATCAtt	Loss of TFBS
bna100892	A04	435378	A	G	BnaA04g00570D	-473	0	ZHD3	20	-	0.97	0.936	ggaATCATtgtgaa	Loss of TFBS
bna100893	A04	435801	T	C	BnaA04g00570D	-50	0	Adof1	14	-	1	0.929	ttcttttgaCTTTTccattat	Loss of TFBS
bna100893	A04	435801	T	C	BnaA04g00570D	-50	0	AT1G69570	10	+	1	0.887	actattCTTTTgacttttccattatct	Loss of TFBS
bna100893	A04	435801	T	C	BnaA04g00570D	-50	0	AT1G69570	17	+	1	0.878	ttttgaCTTTTccattatctatataag	Loss of TFBS
bna100893	A04	435801	T	C	BnaA04g00570D	-50	0	AT2G28810	9	+	1	0.921	tactattcttttgaCTTTTcc	Loss of TFBS
bna100893	A04	435801	T	C	BnaA04g00570D	-50	0	AT5G02460	9	-	1	0.891	tactattcttttgaCTTTTcc	Loss of TFBS
bna100893	A04	435801	T	C	BnaA04g00570D	-50	0	AT5G66940	7	+	1	0.91	tctactattcttttgaCTTTTccattatc	Loss of TFBS
bna100893	A04	435801	T	C	BnaA04g00570D	-50	0	CDF3	20	-	1	0.982	tgaCTTTTc	Loss of TFBS
bna100893	A04	435801	T	C	BnaA04g00570D	-50	0	COG1	17	-	1	0.917	ttttgaCTTTTccattatcta	Loss of TFBS
bna100893	A04	435801	T	C	BnaA04g00570D	-50	0	Dof2	21	-	0.961	0.961	gACTTT	Loss of TFBS
bna100893	A04	435801	T	C	BnaA04g00570D	-50	0	Dof3	21	-	0.994	0.986	gACTTT	Loss of TFBS
bna100893	A04	435801	T	C	BnaA04g00570D	-50	0	MNB1A	22	-	0.97	0.97	ACTTT	Loss of TFBS
bna100893	A04	435801	T	C	BnaA04g00570D	-50	0	OBP1	8	+	1	0.944	ctactattcttttgaCTTTTc	Loss of TFBS
bna100893	A04	435801	T	C	BnaA04g00570D	-50	0	PBF	22	-	0.985	0.985	ACTTT	Loss of TFBS
bna100893	A04	435801	T	C	BnaA04g00570D	-50	0	WRKY11	15	+	1	0.914	tcttTTGACttttc	Loss of TFBS
bna100893	A04	435801	T	C	BnaA04g00570D	-50	0	WRKY14	15	-	1	0.883	tcttTTGACtttt	Loss of TFBS
bna100893	A04	435801	T	C	BnaA04g00570D	-50	0	WRKY24	16	+	1	0.891	cttTTGACttttcc	Loss of TFBS
bna100893	A04	435801	T	C	BnaA04g00570D	-50	0	WRKY27	15	+	1	0.897	tcttTTGACtttt	Loss of TFBS
bna100893	A04	435801	T	C	BnaA04g00570D	-50	0	WRKY46	17	+	1	0.88	ttTTGACtttt	Loss of TFBS
bna100893	A04	435801	T	C	BnaA04g00570D	-50	0	WRKY50	17	+	1	0.994	ttTTGACttttcc	Loss of TFBS
bna100893	A04	435801	T	C	BnaA04g00570D	-50	0	WRKY65	17	-	1	0.877	ttTTGACtttt	Loss of TFBS
bna100893	A04	435801	T	C	BnaA04g00570D	-50	0	WRKY7	15	+	1	0.891	tcttTTGACttttc	Loss of TFBS
bna100962	A04	483280	T	C	BnaA04g00630D	-267	0	WRKY12	24	-	1	0.895	tGTCAAcc	Loss of TFBS
bna100962	A04	483280	T	C	BnaA04g00630D	-267	0	WRKY15	23	+	1	0.977	ttGTCAAcct	Loss of TFBS
bna100962	A04	483280	T	C	BnaA04g00630D	-267	0	WRKY18	22	+	1	0.948	attGTCAAcc	Loss of TFBS
bna100962	A04	483280	T	C	BnaA04g00630D	-267	0	WRKY20	21	-	1	0.916	gattGTCAAccta	Loss of TFBS
bna100962	A04	483280	T	C	BnaA04g00630D	-267	0	WRKY21	22	+	1	0.983	attGTCAAcc	Loss of TFBS
bna100962	A04	483280	T	C	BnaA04g00630D	-267	0	WRKY23	24	+	1	0.899	tGTCAAcc	Loss of TFBS
bna100962	A04	483280	T	C	BnaA04g00630D	-267	0	WRKY28	22	+	1	0.979	attGTCAAcct	Loss of TFBS
bna100962	A04	483280	T	C	BnaA04g00630D	-267	0	WRKY30	24	+	1	0.976	tGTCAAccta	Loss of TFBS
bna100962	A04	483280	T	C	BnaA04g00630D	-267	0	WRKY31	13	+	1	0.895	ctataacagattGTCAAcc	Loss of TFBS
bna100962	A04	483280	T	C	BnaA04g00630D	-267	0	WRKY38	24	-	1	0.898	tGTCAAcc	Loss of TFBS
bna100962	A04	483280	T	C	BnaA04g00630D	-267	0	WRKY42	21	-	1	0.931	gattGTCAAcctaaaaaaagg	Loss of TFBS
bna100962	A04	483280	T	C	BnaA04g00630D	-267	0	WRKY43	23	+	1	0.961	ttGTCAAcct	Loss of TFBS
bna100962	A04	483280	T	C	BnaA04g00630D	-267	0	WRKY55	22	-	1	0.877	attGTCAAccta	Loss of TFBS
bna100962	A04	483280	T	C	BnaA04g00630D	-267	0	WRKY6	13	-	1	0.898	ctataacagattGTCAAcc	Loss of TFBS
bna100962	A04	483280	T	C	BnaA04g00630D	-267	0	WRKY60	22	+	1	0.916	attGTCAAcct	Loss of TFBS
bna100962	A04	483280	T	C	BnaA04g00630D	-267	0	WRKY62	23	+	1	0.938	ttGTCAAc	Loss of TFBS
bna100962	A04	483280	T	C	BnaA04g00630D	-267	0	WRKY65	21	+	1	0.878	gattGTCAAcc	Loss of TFBS
bna100962	A04	483280	T	C	BnaA04g00630D	-267	0	WRKY75	23	+	1	0.959	ttGTCAAc	Loss of TFBS
bna100962	A04	483280	T	C	BnaA04g00630D	-267	0	WRKY8	23	+	1	0.987	ttGTCAAcc	Loss of TFBS
bna100974	A04	487329	T	A	BnaA04g00650D	-186	0	ATHB-12	21	+	1	0.926	aaTGATTa	Loss of TFBS
bna100974	A04	487329	T	A	BnaA04g00650D	-186	0	ATHB-16	20	+	0.97	0.98	tAATGAtt	Loss of TFBS
bna100974	A04	487329	T	A	BnaA04g00650D	-186	0	ATHB-16	21	-	0.984	0.989	aaTGATTa	Loss of TFBS
bna100974	A04	487329	T	A	BnaA04g00650D	-186	0	ATHB-5	19	-	1	0.947	ataaTGATTagg	Loss of TFBS
bna100974	A04	487329	T	A	BnaA04g00650D	-186	0	ATHB-5	19	+	0.987	0.925	ataATGATt	Loss of TFBS
bna100974	A04	487329	T	A	BnaA04g00650D	-186	0	ATHB-5	21	-	0.981	0.931	aATGATtag	Loss of TFBS
bna100974	A04	487329	T	A	BnaA04g00650D	-186	0	ATHB15	15	+	1	0.987	aaaaataATGATtag	Loss of TFBS
bna100974	A04	487329	T	A	BnaA04g00650D	-186	0	ATHB18	19	+	0.961	0.95	ataATGATtag	Loss of TFBS
bna100974	A04	487329	T	A	BnaA04g00650D	-186	0	ATHB18	19	-	1	0.977	ataATGATtag	Loss of TFBS
bna100974	A04	487329	T	A	BnaA04g00650D	-186	0	ATHB4	19	-	1	0.967	ataATGATta	Loss of TFBS
bna100974	A04	487329	T	A	BnaA04g00650D	-186	0	ATHB4	20	+	0.999	0.967	taATGATtag	Loss of TFBS
bna100974	A04	487329	T	A	BnaA04g00650D	-186	0	HAT1	20	-	1	0.994	taaTGATTag	Loss of TFBS
bna100974	A04	487329	T	A	BnaA04g00650D	-186	0	HAT2	20	-	1	0.979	taaTGATTagg	Loss of TFBS
bna100974	A04	487329	T	A	BnaA04g00650D	-186	0	HAT22	21	-	1	0.999	aaTGATTagg	Loss of TFBS
bna100974	A04	487329	T	A	BnaA04g00650D	-186	0	ZHD5	20	+	0.985	0.953	taatgATTAGg	Loss of TFBS
bna101054	A04	520003	G	C	BnaA04g00700D	-435	0	ATHB-12	19	+	0.965	0.949	taTCATTg	Loss of TFBS
bna101054	A04	520003	G	C	BnaA04g00700D	-435	0	MYB56	20	-	0.943	0.863	atcatTGTTAttgct	Loss of TFBS
bna101054	A04	520003	G	C	BnaA04g00700D	-435	0	ZHD3	17	-	0.97	0.915	tatATCATtgttat	Loss of TFBS
bna101056	A04	523411	C	T	BnaA04g00710D	-276	0	FaEOBII	23	-	1	0.995	ttaCCTAAcc	Loss of TFBS
bna101056	A04	523411	C	T	BnaA04g00710D	-276	0	MYB111	24	-	1	0.971	tACCTAac	Loss of TFBS
bna101056	A04	523411	C	T	BnaA04g00710D	-276	0	MYB24	25	-	1	0.998	aCCTAAcca	Loss of TFBS
bna101056	A04	523411	C	T	BnaA04g00710D	-276	0	MYB3	22	-	1	0.947	tttACCTAacc	Loss of TFBS
bna101056	A04	523411	C	T	BnaA04g00710D	-276	0	MYB46	24	-	1	1	tACCTAac	Loss of TFBS
bna101056	A04	523411	C	T	BnaA04g00710D	-276	0	MYB55	25	+	1	0.896	ACCTAacc	Loss of TFBS
bna101056	A04	523411	C	T	BnaA04g00710D	-276	0	MYB57	22	+	1	0.921	tttaCCTAAccaca	Loss of TFBS
bna101056	A04	523411	C	T	BnaA04g00710D	-276	0	MYB59	24	-	1	1	tACCTAac	Loss of TFBS
bna101056	A04	523411	C	T	BnaA04g00710D	-276	0	MYB62	23	-	1	0.945	ttaCCTAAccacaaa	Loss of TFBS
bna101056	A04	523411	C	T	BnaA04g00710D	-276	1	ATHB40	8	-	1	0.876	aacatcattaaTTATTtatct	Gain of TFBS
bna101064	A04	531761	A	G	BnaA04g00730D	-377	0	WRKY15	20	+	1	0.965	tcGTCAAaac	Loss of TFBS
bna101064	A04	531761	A	G	BnaA04g00730D	-377	0	WRKY18	19	+	1	0.946	gtcGTCAAaa	Loss of TFBS
bna101064	A04	531761	A	G	BnaA04g00730D	-377	0	WRKY43	20	+	1	0.958	tcGTCAAaac	Loss of TFBS
bna101064	A04	531761	A	G	BnaA04g00730D	-377	0	WRKY62	20	+	1	0.895	tcGTCAAa	Loss of TFBS
bna101064	A04	531761	A	G	BnaA04g00730D	-377	0	WRKY75	20	+	1	0.937	tcGTCAAa	Loss of TFBS
bna101064	A04	531761	A	G	BnaA04g00730D	-377	0	WRKY8	20	+	1	0.981	tcGTCAAaa	Loss of TFBS
bna101069	A04	540079	G	T	BnaA04g00750D	77	0	SPL8	20	+	0.981	0.91	actagAGTACcacaac	Loss of TFBS
bna101069	A04	540079	G	T	BnaA04g00750D	77	0	SPL8	20	-	0.98	0.907	actagaGTACCacaac	Loss of TFBS
bna101069	A04	540079	G	T	BnaA04g00750D	77	0	SPL9	22	-	0.993	0.936	tagAGTACcac	Loss of TFBS
bna101069	A04	540079	G	T	BnaA04g00750D	77	0	SPL9	23	+	0.957	0.898	agaGTACCaca	Loss of TFBS
bna101070	A04	540112	T	A	BnaA04g00750D	44	1	ATHB-12	25	-	0.958	0.91	cAATAAgt	Gain of TFBS
bna101072	A04	540213	A	G	BnaA04g00750D	-57	0	WRKY15	20	-	1	0.977	acaTTGACta	Loss of TFBS
bna101072	A04	540213	A	G	BnaA04g00750D	-57	0	WRKY18	21	-	1	0.981	caTTGACtaa	Loss of TFBS
bna101072	A04	540213	A	G	BnaA04g00750D	-57	0	WRKY20	19	+	1	0.933	cacaTTGACtaac	Loss of TFBS
bna101072	A04	540213	A	G	BnaA04g00750D	-57	0	WRKY23	21	-	1	0.91	caTTGACt	Loss of TFBS
bna101072	A04	540213	A	G	BnaA04g00750D	-57	0	WRKY25	22	-	1	0.917	aTTGACta	Loss of TFBS
bna101072	A04	540213	A	G	BnaA04g00750D	-57	0	WRKY28	19	+	1	0.911	cacaTTGACtaac	Loss of TFBS
bna101072	A04	540213	A	G	BnaA04g00750D	-57	0	WRKY28	20	-	1	0.916	acaTTGACtaa	Loss of TFBS
bna101072	A04	540213	A	G	BnaA04g00750D	-57	0	WRKY3	21	-	1	0.897	caTTGACtaac	Loss of TFBS
bna101072	A04	540213	A	G	BnaA04g00750D	-57	0	WRKY30	19	-	1	0.927	cacaTTGACt	Loss of TFBS
bna101072	A04	540213	A	G	BnaA04g00750D	-57	0	WRKY33	21	-	1	0.906	caTTGACtaac	Loss of TFBS
bna101072	A04	540213	A	G	BnaA04g00750D	-57	0	WRKY43	20	-	1	0.988	acaTTGACta	Loss of TFBS
bna101072	A04	540213	A	G	BnaA04g00750D	-57	0	WRKY45	21	+	1	0.889	caTTGACt	Loss of TFBS
bna101072	A04	540213	A	G	BnaA04g00750D	-57	0	WRKY47	16	+	1	0.91	agtcacaTTGACta	Loss of TFBS
bna101072	A04	540213	A	G	BnaA04g00750D	-57	0	WRKY55	19	+	1	0.879	cacaTTGACtaa	Loss of TFBS
bna101072	A04	540213	A	G	BnaA04g00750D	-57	0	WRKY59	21	-	1	0.933	caTTGACtaact	Loss of TFBS
bna101072	A04	540213	A	G	BnaA04g00750D	-57	0	WRKY60	20	-	1	0.905	acaTTGACtaa	Loss of TFBS
bna101072	A04	540213	A	G	BnaA04g00750D	-57	0	WRKY62	22	-	1	0.897	aTTGACta	Loss of TFBS
bna101072	A04	540213	A	G	BnaA04g00750D	-57	0	WRKY75	22	-	1	0.968	aTTGACta	Loss of TFBS
bna101072	A04	540213	A	G	BnaA04g00750D	-57	0	WRKY8	21	-	1	0.989	caTTGACta	Loss of TFBS
bna101073	A04	540259	T	A	BnaA04g00750D	-103	0	HSFA6B	14	-	0.767	0.863	aaACTAGaaagttct	Loss of TFBS
bna101073	A04	540259	T	A	BnaA04g00750D	-103	0	HSFB2A	16	-	1	0.915	acTAGAAagttc	Loss of TFBS
bna101073	A04	540259	T	A	BnaA04g00750D	-103	0	HSFB2A	20	+	1	0.874	gaaagTTCTAct	Loss of TFBS
bna101073	A04	540259	T	A	BnaA04g00750D	-103	0	HSFC1	17	+	1	0.986	CTAGAaagttc	Loss of TFBS
bna101073	A04	540259	T	A	BnaA04g00750D	-103	1	SPL8	18	+	0.981	0.955	tagaaAGTACtacttt	Gain of TFBS
bna101073	A04	540259	T	A	BnaA04g00750D	-103	1	SPL8	18	-	0.981	0.944	tagaaaGTACTacttt	Gain of TFBS
bna101073	A04	540259	T	A	BnaA04g00750D	-103	1	SPL9	20	-	0.993	0.945	gaaAGTACtac	Gain of TFBS
bna101073	A04	540259	T	A	BnaA04g00750D	-103	1	SPL9	21	+	0.993	0.934	aaaGTACTact	Gain of TFBS
bna101074	A04	540290	A	C	BnaA04g00750D	-134	0	SGR5	15	+	1	0.919	tttcaaaGACAAaac	Loss of TFBS
bna101085	A04	545807	C	T	BnaA04g00770D	-130	1	MYB113	17	-	0.978	0.928	TTAACttactc	Gain of TFBS
bna101086	A04	545894	C	A	BnaA04g00770D	-43	0	ARR10	20	-	1	0.986	tcaGATCT	Loss of TFBS
bna101086	A04	545894	C	A	BnaA04g00770D	-43	0	ARR2	20	+	1	0.913	tcagATCTTt	Loss of TFBS
bna101086	A04	545894	C	A	BnaA04g00770D	-43	0	Dof2	24	-	0.965	0.964	aTCTTT	Loss of TFBS
bna101086	A04	545894	C	A	BnaA04g00770D	-43	0	GATA10	21	-	1	0.964	caGATCTt	Loss of TFBS
bna101086	A04	545894	C	A	BnaA04g00770D	-43	0	GATA11	21	+	1	0.944	caGATCTt	Loss of TFBS
bna101086	A04	545894	C	A	BnaA04g00770D	-43	0	GATA11	21	-	1	0.98	cAGATCtt	Loss of TFBS
bna101086	A04	545894	C	A	BnaA04g00770D	-43	0	GATA12	21	+	1	0.995	cAGATCtt	Loss of TFBS
bna101086	A04	545894	C	A	BnaA04g00770D	-43	0	GATA12	21	-	1	0.995	caGATCTt	Loss of TFBS
bna101086	A04	545894	C	A	BnaA04g00770D	-43	0	GATA14	16	-	1	0.972	aaaatcaGATCTttc	Loss of TFBS
bna101086	A04	545894	C	A	BnaA04g00770D	-43	0	GATA14	19	+	1	0.92	atcAGATCtttcctt	Loss of TFBS
bna101086	A04	545894	C	A	BnaA04g00770D	-43	0	GATA19	18	-	0.991	0.985	aatcAGATCtt	Loss of TFBS
bna101086	A04	545894	C	A	BnaA04g00770D	-43	0	GATA20	19	+	0.978	0.985	atcAGATC	Loss of TFBS
bna101086	A04	545894	C	A	BnaA04g00770D	-43	0	GATA9	19	+	1	0.982	atcAGATCttt	Loss of TFBS
bna101086	A04	545894	C	A	BnaA04g00770D	-43	0	GATA9	20	-	1	0.986	tcaGATCTttc	Loss of TFBS
bna101086	A04	545894	C	A	BnaA04g00770D	-43	0	MNB1A	25	-	0.97	0.97	TCTTT	Loss of TFBS
bna101086	A04	545894	C	A	BnaA04g00770D	-43	0	PBF	25	-	0.969	0.969	TCTTT	Loss of TFBS
bna101086	A04	545894	C	A	BnaA04g00770D	-43	1	LHY1	22	+	1	0.982	aGATATttcc	Gain of TFBS
bna101086	A04	545894	C	A	BnaA04g00770D	-43	1	LCL1	22	+	1	0.947	agATATTtcc	Gain of TFBS
bna101086	A04	545894	C	A	BnaA04g00770D	-43	1	CCA1	22	-	1	1	aGATATtt	Gain of TFBS
bna101086	A04	545894	C	A	BnaA04g00770D	-43	1	AT3G10113	20	-	1	0.983	tcagATATTtccttc	Gain of TFBS
bna101086	A04	545894	C	A	BnaA04g00770D	-43	1	At3g09600	22	+	1	0.972	agATATTtcctt	Gain of TFBS
bna101086	A04	545894	C	A	BnaA04g00770D	-43	1	RVE1	20	-	1	0.983	tcagATATTtcctt	Gain of TFBS
bna101086	A04	545894	C	A	BnaA04g00770D	-43	1	RVE6	22	+	1	0.96	agATATTtcct	Gain of TFBS
bna101086	A04	545894	C	A	BnaA04g00770D	-43	1	RVE5	22	+	1	0.961	aGATATttcct	Gain of TFBS
bna101086	A04	545894	C	A	BnaA04g00770D	-43	1	RVE7	19	-	1	0.97	atcaGATATttcct	Gain of TFBS
bna101086	A04	545894	C	A	BnaA04g00770D	-43	1	EPR1	20	-	1	0.955	tcagATATTtcc	Gain of TFBS
bna101088	A04	545975	G	A	BnaA04g00770D	38	1	Dof3	25	+	0.968	0.969	AAAGAg	Gain of TFBS
bna101088	A04	545975	G	A	BnaA04g00770D	38	1	Dof2	25	+	0.965	0.963	AAAGAg	Gain of TFBS
bna101088	A04	545975	G	A	BnaA04g00770D	38	1	MNB1A	25	+	0.97	0.97	AAAGA	Gain of TFBS
bna101088	A04	545975	G	A	BnaA04g00770D	38	1	PBF	25	+	0.969	0.969	AAAGA	Gain of TFBS
bna101113	A04	556144	A	G	BnaA04g00800D	-265	0	GATA19	20	-	0.991	0.904	cttcGGATCgg	Loss of TFBS
bna101113	A04	556144	A	G	BnaA04g00800D	-265	0	GATA19	23	+	1	0.941	cgGATCGggtt	Loss of TFBS
bna101113	A04	556144	A	G	BnaA04g00800D	-265	0	GATA20	21	+	1	0.891	ttcGGATC	Loss of TFBS
bna101113	A04	556144	A	G	BnaA04g00800D	-265	0	GATA20	25	-	0.988	0.894	GATCGggt	Loss of TFBS
bna101113	A04	556144	A	G	BnaA04g00800D	-265	1	CMTA3	22	+	0.928	0.905	tCGGGTcgg	Gain of TFBS
bna101113	A04	556144	A	G	BnaA04g00800D	-265	1	ERF018	24	-	1	0.89	ggGTCGGg	Gain of TFBS
bna101113	A04	556144	A	G	BnaA04g00800D	-265	1	DREB1A	24	+	1	0.927	ggGTCGGgtt	Gain of TFBS
bna101114	A04	556340	G	A	BnaA04g00800D	-461	0	AT3G52440	19	+	1	0.965	taAAAAGgcat	Loss of TFBS
bna101114	A04	556340	G	A	BnaA04g00800D	-461	0	DAG2	19	+	1	0.966	taAAAAGgcat	Loss of TFBS
bna101114	A04	556340	G	A	BnaA04g00800D	-461	1	MNB1A	22	+	0.97	0.97	AAAGA	Gain of TFBS
bna10112	A01	6398301	G	T	BnaA01g12790D	-327	0	Dof2	23	+	0.961	0.961	AAAGGa	Loss of TFBS
bna10112	A01	6398301	G	T	BnaA01g12790D	-327	0	Dof3	23	+	0.977	0.97	AAAGGa	Loss of TFBS
bna10112	A01	6398301	G	T	BnaA01g12790D	-327	0	OBP1	21	-	0.925	0.91	aGAAAGgaaaaatacaaacaa	Loss of TFBS
bna10112	A01	6398301	G	T	BnaA01g12790D	-327	0	PBF	23	+	0.969	0.969	AAAGG	Loss of TFBS
bna101124	A04	561197	A	C	BnaA04g00820D	-179	1	ARR10	20	-	0.996	0.956	aaaAATCT	Gain of TFBS
bna101125	A04	561384	T	G	BnaA04g00820D	-366	0	Dof2	22	-	0.961	0.961	aACTTT	Loss of TFBS
bna101125	A04	561384	T	G	BnaA04g00830D	-437	0	Dof2	22	-	0.961	0.961	aACTTT	Loss of TFBS
bna101125	A04	561384	T	G	BnaA04g00820D	-366	0	Dof3	22	-	0.994	0.971	aACTTT	Loss of TFBS
bna101125	A04	561384	T	G	BnaA04g00830D	-437	0	Dof3	22	-	0.994	0.971	aACTTT	Loss of TFBS
bna101125	A04	561384	T	G	BnaA04g00820D	-366	0	MNB1A	23	-	0.97	0.97	ACTTT	Loss of TFBS
bna101125	A04	561384	T	G	BnaA04g00830D	-437	0	MNB1A	23	-	0.97	0.97	ACTTT	Loss of TFBS
bna101125	A04	561384	T	G	BnaA04g00820D	-366	0	PBF	23	-	0.985	0.985	ACTTT	Loss of TFBS
bna101125	A04	561384	T	G	BnaA04g00830D	-437	0	PBF	23	-	0.985	0.985	ACTTT	Loss of TFBS
bna101125	A04	561384	T	G	BnaA04g00820D	-366	1	MYB56	16	+	0.957	0.941	atgtaTAACTgtaaa	Gain of TFBS
bna101125	A04	561384	T	G	BnaA04g00830D	-437	1	MYB56	16	+	0.957	0.941	atgtaTAACTgtaaa	Gain of TFBS
bna101125	A04	561384	T	G	BnaA04g00820D	-366	1	F3A4.140	20	-	1	0.902	atAACTGtaaata	Gain of TFBS
bna101125	A04	561384	T	G	BnaA04g00830D	-437	1	F3A4.140	20	-	1	0.902	atAACTGtaaata	Gain of TFBS
bna101125	A04	561384	T	G	BnaA04g00820D	-366	1	MYB65	17	+	0.975	0.964	tgtatAACTGtaa	Gain of TFBS
bna101125	A04	561384	T	G	BnaA04g00830D	-437	1	MYB65	17	+	0.975	0.964	tgtatAACTGtaa	Gain of TFBS
bna101125	A04	561384	T	G	BnaA04g00820D	-366	1	MYB70	21	+	0.994	0.931	tAACTGtaaataat	Gain of TFBS
bna101125	A04	561384	T	G	BnaA04g00830D	-437	1	MYB70	21	+	0.994	0.931	tAACTGtaaataat	Gain of TFBS
bna101125	A04	561384	T	G	BnaA04g00820D	-366	1	MYB73	21	+	0.994	0.992	tAACTGtaaat	Gain of TFBS
bna101125	A04	561384	T	G	BnaA04g00830D	-437	1	MYB73	21	+	0.994	0.992	tAACTGtaaat	Gain of TFBS
bna101125	A04	561384	T	G	BnaA04g00820D	-366	1	MYB77	21	-	0.985	0.978	tAACTGtaaataatt	Gain of TFBS
bna101125	A04	561384	T	G	BnaA04g00830D	-437	1	MYB77	21	-	0.985	0.978	tAACTGtaaataatt	Gain of TFBS
bna101125	A04	561384	T	G	BnaA04g00820D	-366	1	MYB33	20	+	0.994	0.96	aTAACTgtaaa	Gain of TFBS
bna101125	A04	561384	T	G	BnaA04g00830D	-437	1	MYB33	20	+	0.994	0.96	aTAACTgtaaa	Gain of TFBS
bna101125	A04	561384	T	G	BnaA04g00820D	-366	1	MYB1	12	-	0.936	0.928	aaatatgtatAACTGtaaa	Gain of TFBS
bna101125	A04	561384	T	G	BnaA04g00830D	-437	1	MYB1	12	-	0.936	0.928	aaatatgtatAACTGtaaa	Gain of TFBS
bna101138	A04	605015	G	A	BnaA04g00860D	-122	1	WRKY33	25	+	1	0.902	aacgGTCAAct	Gain of TFBS
bna101138	A04	605015	G	A	BnaA04g00860D	-122	1	MYB3R1	23	-	1	0.949	ggAACGGtcaactaa	Gain of TFBS
bna101138	A04	605015	G	A	BnaA04g00860D	-122	1	MYB3R4	23	-	1	0.948	ggAACGGtcaactaa	Gain of TFBS
bna101138	A04	605015	G	A	BnaA04g00860D	-122	1	MYB73	23	+	1	0.988	ggAACGGtcaac	Gain of TFBS
bna101138	A04	605015	G	A	BnaA04g00860D	-122	1	MYB77	24	-	0.988	0.909	gAACGGtcaactaac	Gain of TFBS
bna101138	A04	605015	G	A	BnaA04g00860D	-122	1	MYB3R5	24	-	1	0.931	gAACGGtcaactaac	Gain of TFBS
bna101138	A04	605015	G	A	BnaA04g00860D	-122	1	MYB1	15	-	1	0.914	tctcatttggAACGGtcaa	Gain of TFBS
bna101138	A04	605015	G	A	BnaA04g00860D	-122	1	WRKY59	24	+	1	0.921	gaacgGTCAAct	Gain of TFBS
bna101138	A04	605015	G	A	BnaA04g00860D	-122	1	F3A4.140	23	-	0.941	0.891	ggAACGGtcaact	Gain of TFBS
bna101138	A04	605015	G	A	BnaA04g00860D	-122	1	WRKY24	23	-	1	0.871	ggaacgGTCAActa	Gain of TFBS
bna101138	A04	605015	G	A	BnaA04g00860D	-122	1	WRKY26	25	+	1	0.867	aacgGTCAActaa	Gain of TFBS
bna101138	A04	605015	G	A	BnaA04g00860D	-122	1	WRKY3	25	+	1	0.906	aacgGTCAAct	Gain of TFBS
bna101158	A04	614840	C	T	BnaA04g00880D	-68	0	POPTR_0002s00440g	25	-	1	0.944	tCGTACc	Loss of TFBS
bna101158	A04	614840	C	T	BnaA04g00880D	-68	0	SPL12	24	-	1	0.982	atCGTACc	Loss of TFBS
bna101159	A04	614911	T	C	BnaA04g00880D	-139	0	MNB1A	26	-	0.97	0.97	TCTTT	Loss of TFBS
bna101159	A04	614911	T	C	BnaA04g00880D	-139	0	SPL8	25	-	0.981	0.903	gtctttGTACTtattt	Loss of TFBS
bna101160	A04	615045	A	G	BnaA04g00880D	-273	0	ATHB23	19	+	1	0.995	atAATTAata	Loss of TFBS
bna101160	A04	615045	A	G	BnaA04g00880D	-273	0	ATHB34	20	-	1	0.947	tAATTAataaaatga	Loss of TFBS
bna101160	A04	615045	A	G	BnaA04g00880D	-273	0	HDG1	19	+	1	0.929	ataaTTAATaa	Loss of TFBS
bna101160	A04	615045	A	G	BnaA04g00880D	-273	0	ZHD6	15	+	1	0.967	ttacatAATTAataa	Loss of TFBS
bna101160	A04	615045	A	G	BnaA04g00880D	-273	1	squamosa	17	+	0.814	0.894	acataATTAGtaaa	Gain of TFBS
bna101203	A04	629828	A	T	BnaA04g00930D	-397	0	Dof2	26	+	1	1	AAAGCa	Loss of TFBS
bna101203	A04	629828	A	T	BnaA04g00930D	-397	0	Dof3	26	+	1	0.993	AAAGCa	Loss of TFBS
bna101203	A04	629828	A	T	BnaA04g00930D	-397	0	MNB1A	26	+	1	1	AAAGC	Loss of TFBS
bna101203	A04	629828	A	T	BnaA04g00930D	-397	0	PBF	26	+	1	1	AAAGC	Loss of TFBS
bna101207	A04	629977	G	C	BnaA04g00930D	-248	0	WRKY15	21	-	1	0.964	tgtTTGACaa	Loss of TFBS
bna101207	A04	629977	G	C	BnaA04g00930D	-248	0	WRKY18	22	-	1	0.946	gtTTGACaaa	Loss of TFBS
bna101207	A04	629977	G	C	BnaA04g00930D	-248	0	WRKY62	23	-	1	0.895	tTTGACaa	Loss of TFBS
bna101207	A04	629977	G	C	BnaA04g00930D	-248	0	WRKY75	23	-	1	0.936	tTTGACaa	Loss of TFBS
bna101207	A04	629977	G	C	BnaA04g00930D	-248	0	WRKY8	22	-	1	0.98	gtTTGACaa	Loss of TFBS
bna101208	A04	630099	A	G	BnaA04g00930D	-126	1	MYB62	15	+	1	0.953	gcattatTTAGGttg	Gain of TFBS
bna101231	A04	666562	G	T	BnaA04g01000D	-494	1	ZHD5	24	-	0.95	0.959	gATAATtacaa	Gain of TFBS
bna101250	A04	686387	C	T	BnaA04g01050D	-259	0	AT1G76870	18	+	1	0.97	gcacaAAACCgtga	Loss of TFBS
bna101250	A04	686387	C	T	BnaA04g01050D	-259	0	MYB1	14	-	0.972	0.885	gtcagcacaaAACCGtgac	Loss of TFBS
bna101250	A04	686387	C	T	BnaA04g01050D	-259	0	MYB77	23	-	1	0.911	aAACCGtgaccctcg	Loss of TFBS
bna101275	A04	729348	G	A	BnaA04g01120D	-74	1	ATHB23	18	-	1	0.988	gttTAATTac	Gain of TFBS
bna101275	A04	729348	G	A	BnaA04g01120D	-74	1	ZHD6	17	-	1	0.95	cgttTAATTacatca	Gain of TFBS
bna101275	A04	729348	G	A	BnaA04g01120D	-74	1	ZHD5	19	-	1	0.995	tTTAATtacat	Gain of TFBS
bna101276	A04	729536	T	G	BnaA04g01120D	-262	1	ARF16	16	+	1	0.961	caaaaGACAAgagt	Gain of TFBS
bna101291	A04	739089	A	G	BnaA04g01140D	-316	0	At1g74840	19	+	1	0.948	aacGGATAatg	Loss of TFBS
bna101291	A04	739089	A	G	BnaA04g01140D	-316	0	At5g08520	17	+	1	0.899	agaacgGATAAtg	Loss of TFBS
bna101291	A04	739089	A	G	BnaA04g01140D	-316	0	AT5G56840	17	-	1	0.887	agaacgGATAAtgca	Loss of TFBS
bna101291	A04	739089	A	G	BnaA04g01140D	-316	0	At5g58900	19	+	1	0.916	aacgGATAAtgcaaa	Loss of TFBS
bna101291	A04	739089	A	G	BnaA04g01140D	-316	0	KUA1	19	-	1	0.934	aacgGATAAtgcaaa	Loss of TFBS
bna101291	A04	739089	A	G	BnaA04g01140D	-316	1	AGL42	23	-	1	1	gaTGATG	Gain of TFBS
bna101303	A04	760581	C	T	BnaA04g01180D	99	0	BHLH112	22	+	1	0.934	tcaACTTGa	Loss of TFBS
bna101303	A04	760581	C	T	BnaA04g01180D	99	0	bHLH130	21	+	1	0.981	ctcaACTTGaa	Loss of TFBS
bna101303	A04	760581	C	T	BnaA04g01180D	99	0	bHLH80	21	-	1	0.955	ctcaACTTGaa	Loss of TFBS
bna101304	A04	760592	T	A	BnaA04g01180D	88	0	ARR10	19	-	0.996	0.956	aaaAATCT	Loss of TFBS
bna101305	A04	761049	T	C	BnaA04g01180D	-369	0	CDF3	20	-	1	0.98	agaCTTTTg	Loss of TFBS
bna101305	A04	761049	T	C	BnaA04g01180D	-369	0	Dof2	21	-	0.961	0.961	gACTTT	Loss of TFBS
bna101305	A04	761049	T	C	BnaA04g01180D	-369	0	Dof3	21	-	0.994	0.986	gACTTT	Loss of TFBS
bna101305	A04	761049	T	C	BnaA04g01180D	-369	0	MNB1A	22	-	0.97	0.97	ACTTT	Loss of TFBS
bna101305	A04	761049	T	C	BnaA04g01180D	-369	0	PBF	22	-	0.985	0.985	ACTTT	Loss of TFBS
bna101314	A04	764684	T	C	BnaA04g01190D	-22	0	TSO1	14	-	1	0.916	TTTAAatttaagtta	Loss of TFBS
bna101315	A04	764710	C	T	BnaA04g01190D	4	0	abi4	21	+	0.958	0.923	CGCCGctctc	Loss of TFBS
bna101315	A04	764710	C	T	BnaA04g01190D	4	0	CRF2	20	+	1	0.949	gcGCCGCt	Loss of TFBS
bna101315	A04	764710	C	T	BnaA04g01190D	4	0	CRF4	20	+	1	0.929	gCGCCGct	Loss of TFBS
bna101315	A04	764710	C	T	BnaA04g01190D	4	0	ERF109	19	-	0.893	0.918	ggCGCCGc	Loss of TFBS
bna101315	A04	764710	C	T	BnaA04g01190D	4	0	ERF109	20	+	1	0.919	gCGCCGct	Loss of TFBS
bna101315	A04	764710	C	T	BnaA04g01190D	4	0	ERF118	18	+	1	0.942	aggCGCCGctc	Loss of TFBS
bna101315	A04	764710	C	T	BnaA04g01190D	4	0	RAP2-3	20	+	1	0.943	gcGCCGCt	Loss of TFBS
bna101315	A04	764710	C	T	BnaA04g01190D	4	1	MYB1	19	+	1	0.863	ggcgCCGTTctctctttta	Gain of TFBS
bna10136	A01	6410932	T	G	BnaA01g12810D	63	1	CMTA3	19	-	0.936	0.922	ttcACTCGt	Gain of TFBS
bna10136	A01	6410932	T	G	BnaA01g12810D	63	1	WRKY43	24	+	1	0.958	tcGTCAAagt	Gain of TFBS
bna10136	A01	6410932	T	G	BnaA01g12810D	63	1	WRKY47	24	-	1	0.883	tcGTCAAagtctta	Gain of TFBS
bna10136	A01	6410932	T	G	BnaA01g12810D	63	1	WRKY8	24	+	1	0.982	tcGTCAAag	Gain of TFBS
bna10136	A01	6410932	T	G	BnaA01g12810D	63	1	WRKY15	24	+	1	0.968	tcGTCAAagt	Gain of TFBS
bna10136	A01	6410932	T	G	BnaA01g12810D	63	1	WRKY18	23	+	1	0.948	ctcGTCAAag	Gain of TFBS
bna10136	A01	6410932	T	G	BnaA01g12810D	63	1	WRKY60	23	+	1	0.903	ctcGTCAAagt	Gain of TFBS
bna10136	A01	6410932	T	G	BnaA01g12810D	63	1	WRKY62	24	+	1	0.895	tcGTCAAa	Gain of TFBS
bna10136	A01	6410932	T	G	BnaA01g12810D	63	1	WRKY20	22	-	1	0.912	actcGTCAAagtc	Gain of TFBS
bna10136	A01	6410932	T	G	BnaA01g12810D	63	1	WRKY75	24	+	1	0.937	tcGTCAAa	Gain of TFBS
bna10138	A01	6411396	C	A	BnaA01g12810D	-401	0	DREB2	17	-	0.981	0.885	ctcccgcaaCCGCCcgcaacc	Loss of TFBS
bna10138	A01	6411396	C	A	BnaA01g12810D	-401	0	F3A4.140	22	-	1	0.915	gcAACCGcccgca	Loss of TFBS
bna10138	A01	6411396	C	A	BnaA01g12810D	-401	0	Gam1	21	+	1	0.994	cgcAACCGcc	Loss of TFBS
bna101388	A04	773760	C	T	BnaA04g01200D	54	0	ABF1	22	-	1	0.908	ttcgcCACGTtt	Loss of TFBS
bna101388	A04	773760	C	T	BnaA04g01200D	54	0	ABF4	24	+	1	0.97	cgcCACGTttgt	Loss of TFBS
bna101388	A04	773760	C	T	BnaA04g01200D	54	0	AREB3	24	-	1	0.889	cgcCACGTttgttga	Loss of TFBS
bna101388	A04	773760	C	T	BnaA04g01200D	54	0	bZIP16	24	-	1	0.898	cgcCACGTttgttga	Loss of TFBS
bna101388	A04	773760	C	T	BnaA04g01200D	54	0	bZIP28	24	-	1	0.927	cgcCACGTttgttga	Loss of TFBS
bna101388	A04	773760	C	T	BnaA04g01200D	54	0	bZIP68	25	-	1	0.997	gCCACGttt	Loss of TFBS
bna101388	A04	773760	C	T	BnaA04g01200D	54	0	DPBF3	21	+	1	0.91	tttcgcCACGTttgttg	Loss of TFBS
bna101388	A04	773760	C	T	BnaA04g01200D	54	0	EmBP-1	26	-	1	0.983	cCACGTtt	Loss of TFBS
bna101388	A04	773760	C	T	BnaA04g01200D	54	0	GBF2	22	-	1	0.944	ttcgcCACGTttg	Loss of TFBS
bna101388	A04	773760	C	T	BnaA04g01200D	54	0	GBF3	24	+	1	0.872	cgcCACGTttgttga	Loss of TFBS
bna101388	A04	773760	C	T	BnaA04g01200D	54	0	HYH	24	-	1	0.952	cgcCACGTttgt	Loss of TFBS
bna101388	A04	773760	C	T	BnaA04g01200D	54	0	SPT	25	+	1	0.941	gcCACGTtt	Loss of TFBS
bna101388	A04	773760	C	T	BnaA04g01200D	54	1	TGA7	21	-	1	0.906	tttCGTCAcg	Gain of TFBS
bna101390	A04	773876	G	C	BnaA04g01200D	-62	0	AT1G76870	22	-	1	0.938	ttttGGTTTatagt	Loss of TFBS
bna101390	A04	773876	G	C	BnaA04g01200D	-62	1	id1	16	+	1	0.971	tttttctTTTCG	Gain of TFBS
bna101391	A04	773897	G	A	BnaA04g01200D	-83	1	SPL8	18	-	1	0.941	atataaGTACActaag	Gain of TFBS
bna101391	A04	773897	G	A	BnaA04g01200D	-83	1	SPL8	18	+	0.981	0.929	atataAGTACactaag	Gain of TFBS
bna101391	A04	773897	G	A	BnaA04g01200D	-83	1	SPL9	20	-	0.993	0.985	ataAGTACact	Gain of TFBS
bna101392	A04	773916	G	C	BnaA04g01200D	-102	0	MYB56	20	-	0.944	0.855	tttatGGTTAgtaca	Loss of TFBS
bna101394	A04	773983	G	C	BnaA04g01200D	-169	0	WRKY14	23	-	1	0.868	ctagTTGACcata	Loss of TFBS
bna101394	A04	773983	G	C	BnaA04g01200D	-169	0	WRKY20	23	+	1	0.95	ctagTTGACcata	Loss of TFBS
bna101394	A04	773983	G	C	BnaA04g01200D	-169	0	WRKY21	25	-	1	0.996	agTTGACcat	Loss of TFBS
bna101394	A04	773983	G	C	BnaA04g01200D	-169	0	WRKY23	25	-	1	0.916	agTTGACc	Loss of TFBS
bna101394	A04	773983	G	C	BnaA04g01200D	-169	0	WRKY24	24	+	1	0.876	tagTTGACcatata	Loss of TFBS
bna101394	A04	773983	G	C	BnaA04g01200D	-169	0	WRKY3	25	-	1	0.901	agTTGACcata	Loss of TFBS
bna101394	A04	773983	G	C	BnaA04g01200D	-169	0	WRKY30	23	-	1	0.992	ctagTTGACc	Loss of TFBS
bna101394	A04	773983	G	C	BnaA04g01200D	-169	0	WRKY31	25	-	1	0.918	agTTGACcatataatctgc	Loss of TFBS
bna101394	A04	773983	G	C	BnaA04g01200D	-169	0	WRKY33	25	-	1	0.904	agTTGACcata	Loss of TFBS
bna101394	A04	773983	G	C	BnaA04g01200D	-169	0	WRKY38	25	+	1	0.968	agTTGACc	Loss of TFBS
bna101394	A04	773983	G	C	BnaA04g01200D	-169	0	WRKY42	15	+	1	0.948	ttacggtactagTTGACcata	Loss of TFBS
bna101394	A04	773983	G	C	BnaA04g01200D	-169	0	WRKY45	25	+	1	0.913	agTTGACc	Loss of TFBS
bna101394	A04	773983	G	C	BnaA04g01200D	-169	0	WRKY55	23	+	1	0.897	ctagTTGACcat	Loss of TFBS
bna101394	A04	773983	G	C	BnaA04g01200D	-169	0	WRKY57	25	-	1	0.986	agTTGACcat	Loss of TFBS
bna101394	A04	773983	G	C	BnaA04g01200D	-169	0	WRKY6	25	+	1	0.926	agTTGACcatataatctgc	Loss of TFBS
bna101394	A04	773983	G	C	BnaA04g01200D	-169	0	WRKY65	25	-	1	0.899	agTTGACcata	Loss of TFBS
bna101394	A04	773983	G	C	BnaA04g01200D	-169	1	BHLH112	22	+	1	0.916	actACTTGa	Gain of TFBS
bna101394	A04	773983	G	C	BnaA04g01200D	-169	1	bHLH130	21	+	1	0.938	tactACTTGac	Gain of TFBS
bna101394	A04	773983	G	C	BnaA04g01200D	-169	1	bHLH80	21	-	1	0.903	tactACTTGac	Gain of TFBS
bna101450	A04	781724	G	A	BnaA04g01210D	-423	1	MYB113	23	-	0.978	0.955	TTAACaaattc	Gain of TFBS
bna101451	A04	782016	G	A	BnaA04g01210D	-131	0	LEC2	22	-	1	0.956	cgacGCATGag	Loss of TFBS
bna101451	A04	782016	G	A	BnaA04g01210D	-131	1	ARF8	20	-	1	0.95	caCGACAca	Gain of TFBS
bna101465	A04	784934	T	C	BnaA04g01220D	-243	1	AT3G24120	20	-	0.974	0.955	taTATTCa	Gain of TFBS
bna101493	A04	794194	A	T	BnaA04g01230D	53	0	ARR10	24	+	0.996	0.968	AGATTctt	Loss of TFBS
bna101493	A04	794194	A	T	BnaA04g01230D	53	0	ARR2	22	-	0.954	0.944	gGAGATtctt	Loss of TFBS
bna101493	A04	794194	A	T	BnaA04g01230D	53	0	AT3G24120	23	-	1	0.997	gaGATTCt	Loss of TFBS
bna101493	A04	794194	A	T	BnaA04g01230D	53	0	HHO6	19	+	1	0.91	gccggaGATTC	Loss of TFBS
bna101493	A04	794194	A	T	BnaA04g01230D	53	0	LBD18	17	+	1	0.958	tcgCCGGAgatt	Loss of TFBS
bna101494	A04	794699	G	T	BnaA04g01230D	-452	0	SMZ	22	-	0.87	0.871	gTTCGAga	Loss of TFBS
bna101509	A04	796015	T	C	BnaA04g01240D	72	0	AT5G02460	14	-	1	0.886	tggtagctatttttCTTTTtc	Loss of TFBS
bna101509	A04	796015	T	C	BnaA04g01240D	72	1	AGL27	22	+	1	0.871	aTTTCTctttttcg	Gain of TFBS
bna101509	A04	796015	T	C	BnaA04g01240D	72	1	AP1	23	-	1	0.926	tttctcTTTTTcg	Gain of TFBS
bna101509	A04	796015	T	C	BnaA04g01240D	72	1	SOC1	21	+	0.845	0.875	tatttctctTTTTCg	Gain of TFBS
bna101509	A04	796015	T	C	BnaA04g01240D	72	1	AGL15	23	+	0.941	0.859	TTTCTctttttcgtc	Gain of TFBS
bna101509	A04	796015	T	C	BnaA04g01240D	72	1	CDF3	25	-	1	0.984	tctCTTTTt	Gain of TFBS
bna101511	A04	796140	A	G	BnaA04g01240D	-53	0	ARF27	17	+	1	0.901	tagacAGACAgct	Loss of TFBS
bna101511	A04	796140	A	G	BnaA04g01240D	-53	0	ARF34	19	+	1	0.997	gacAGACAgcttg	Loss of TFBS
bna101511	A04	796140	A	G	BnaA04g01240D	-53	0	bZIP52	21	+	1	0.948	caGACAGcttgcat	Loss of TFBS
bna101511	A04	796140	A	G	BnaA04g01240D	-53	1	RAP211	22	-	0.978	0.896	aGACGGcttgcataa	Gain of TFBS
bna101511	A04	796140	A	G	BnaA04g01240D	-53	1	ERF13	22	-	0.964	0.954	aGACGGct	Gain of TFBS
bna101511	A04	796140	A	G	BnaA04g01240D	-53	1	ERF096	21	-	0.968	0.965	cagACGGCtt	Gain of TFBS
bna101511	A04	796140	A	G	BnaA04g01240D	-53	1	ERF098	23	-	0.988	0.987	gACGGCtt	Gain of TFBS
bna101511	A04	796140	A	G	BnaA04g01240D	-53	1	ERF112	22	-	0.971	0.94	agaCGGCTtg	Gain of TFBS
bna101511	A04	796140	A	G	BnaA04g01240D	-53	1	ERF069	22	-	0.989	0.982	agaCGGCTt	Gain of TFBS
bna101511	A04	796140	A	G	BnaA04g01240D	-53	1	ERF8	20	-	0.972	0.96	acagaCGGCT	Gain of TFBS
bna101511	A04	796140	A	G	BnaA04g01240D	-53	1	ERF7	20	-	0.991	0.98	acagACGGCt	Gain of TFBS
bna101529	A04	799973	C	T	BnaA04g01260D	-449	0	AT3G24120	20	-	0.974	0.967	aaTATTCg	Loss of TFBS
bna101529	A04	799973	C	T	BnaA04g01260D	-449	0	MYR2	17	-	0.996	0.968	ttaaaTATTCgact	Loss of TFBS
bna101529	A04	799973	C	T	BnaA04g01260D	-449	0	PHL11	17	-	1	0.952	ttaaaTATTCgact	Loss of TFBS
bna101529	A04	799973	C	T	BnaA04g01260D	-449	0	PHL12	18	-	1	0.861	taAATATtcgacta	Loss of TFBS
bna101529	A04	799973	C	T	BnaA04g01260D	-449	1	WRKY3	23	-	1	0.914	atTTGACtaat	Gain of TFBS
bna101529	A04	799973	C	T	BnaA04g01260D	-449	1	WRKY57	23	-	1	0.983	atTTGACtaa	Gain of TFBS
bna101529	A04	799973	C	T	BnaA04g01260D	-449	1	WRKY59	23	-	1	0.974	atTTGACtaata	Gain of TFBS
bna101529	A04	799973	C	T	BnaA04g01260D	-449	1	WRKY8	23	-	1	0.991	atTTGACta	Gain of TFBS
bna101529	A04	799973	C	T	BnaA04g01260D	-449	1	WRKY15	22	-	1	0.979	tatTTGACta	Gain of TFBS
bna101529	A04	799973	C	T	BnaA04g01260D	-449	1	WRKY18	23	-	1	0.979	atTTGACtaa	Gain of TFBS
bna101529	A04	799973	C	T	BnaA04g01260D	-449	1	WRKY60	22	-	1	0.909	tatTTGACtaa	Gain of TFBS
bna101529	A04	799973	C	T	BnaA04g01260D	-449	1	WRKY62	24	-	1	0.923	tTTGACta	Gain of TFBS
bna101529	A04	799973	C	T	BnaA04g01260D	-449	1	WRKY20	21	+	1	0.926	atatTTGACtaat	Gain of TFBS
bna101529	A04	799973	C	T	BnaA04g01260D	-449	1	WRKY25	24	-	1	0.921	tTTGACta	Gain of TFBS
bna101529	A04	799973	C	T	BnaA04g01260D	-449	1	WRKY28	22	-	1	0.916	tatTTGACtaa	Gain of TFBS
bna101529	A04	799973	C	T	BnaA04g01260D	-449	1	WRKY28	21	+	1	0.927	atatTTGACtaat	Gain of TFBS
bna101529	A04	799973	C	T	BnaA04g01260D	-449	1	WRKY29	23	-	1	0.894	atTTGACtaat	Gain of TFBS
bna101529	A04	799973	C	T	BnaA04g01260D	-449	1	WRKY75	24	-	1	0.977	tTTGACta	Gain of TFBS
bna101529	A04	799973	C	T	BnaA04g01260D	-449	1	WRKY33	23	-	1	0.923	atTTGACtaat	Gain of TFBS
bna101529	A04	799973	C	T	BnaA04g01260D	-449	1	WRKY43	22	-	1	0.989	tatTTGACta	Gain of TFBS
bna101530	A04	800006	T	G	BnaA04g01260D	-416	1	OBP4	20	+	1	0.957	taAAAAGttggcta	Gain of TFBS
bna101530	A04	800006	T	G	BnaA04g01260D	-416	1	AT3G52440	20	+	1	0.978	taAAAAGttgg	Gain of TFBS
bna101530	A04	800006	T	G	BnaA04g01260D	-416	1	dof4.5	20	+	1	0.878	taAAAAGttggcta	Gain of TFBS
bna101530	A04	800006	T	G	BnaA04g01260D	-416	1	PBF	23	+	0.985	0.985	AAAGT	Gain of TFBS
bna101530	A04	800006	T	G	BnaA04g01260D	-416	1	CDF2	20	+	1	0.993	taAAAAGttg	Gain of TFBS
bna101530	A04	800006	T	G	BnaA04g01260D	-416	1	AT3G45610	12	-	1	0.958	acaaatattaAAAAGttgg	Gain of TFBS
bna101530	A04	800006	T	G	BnaA04g01260D	-416	1	CDF3	21	+	1	0.989	aAAAAGttg	Gain of TFBS
bna101530	A04	800006	T	G	BnaA04g01260D	-416	1	Dof2	23	+	0.961	0.961	AAAGTt	Gain of TFBS
bna101530	A04	800006	T	G	BnaA04g01260D	-416	1	Dof3	23	+	0.994	0.971	AAAGTt	Gain of TFBS
bna101530	A04	800006	T	G	BnaA04g01260D	-416	1	DOF2.5	21	+	1	0.98	aAAAAGtt	Gain of TFBS
bna101530	A04	800006	T	G	BnaA04g01260D	-416	1	DAG2	20	+	1	0.959	taAAAAGttgg	Gain of TFBS
bna101530	A04	800006	T	G	BnaA04g01260D	-416	1	MNB1A	23	+	0.97	0.97	AAAGT	Gain of TFBS
bna101531	A04	800044	A	G	BnaA04g01260D	-378	0	Dof2	25	+	0.965	0.965	AAAGAa	Loss of TFBS
bna101531	A04	800044	A	G	BnaA04g01260D	-378	0	Dof3	25	+	0.968	0.961	AAAGAa	Loss of TFBS
bna101531	A04	800044	A	G	BnaA04g01260D	-378	0	dof4.5	22	+	0.981	0.883	ttTAAAGaagatat	Loss of TFBS
bna101531	A04	800044	A	G	BnaA04g01260D	-378	0	MNB1A	25	+	0.97	0.97	AAAGA	Loss of TFBS
bna101531	A04	800044	A	G	BnaA04g01260D	-378	0	PBF	25	+	0.969	0.969	AAAGA	Loss of TFBS
bna101532	A04	800079	T	A	BnaA04g01260D	-343	1	MNB1A	24	+	1	1	AAAGC	Gain of TFBS
bna101532	A04	800079	T	A	BnaA04g01260D	-343	1	PBF	24	+	1	1	AAAGC	Gain of TFBS
bna101532	A04	800079	T	A	BnaA04g01260D	-343	1	Dof2	24	+	1	0.999	AAAGCt	Gain of TFBS
bna101532	A04	800079	T	A	BnaA04g01260D	-343	1	dof4.5	21	+	0.95	0.876	taCAAAGcttatat	Gain of TFBS
bna101532	A04	800079	T	A	BnaA04g01260D	-343	1	Dof3	24	+	1	0.978	AAAGCt	Gain of TFBS
bna101534	A04	800191	C	T	BnaA04g01260D	-231	1	CDF3	19	-	1	0.984	aaaCTTTTa	Gain of TFBS
bna101535	A04	800440	T	C	BnaA04g01260D	18	0	AT3G45610	12	+	1	0.927	acccCTTTTtataatatcg	Loss of TFBS
bna101536	A04	800483	C	G	BnaA04g01260D	61	0	DRE1C	21	-	0.8	0.862	accCACAT	Loss of TFBS
bna101565	A04	812803	T	C	BnaA04g01300D	-61	1	abi4	24	+	0.965	0.957	CGCTGccacc	Gain of TFBS
bna101581	A04	823245	G	A	BnaA04g01330D	-319	0	NAC058	22	+	0.916	0.934	gcACGCTa	Loss of TFBS
bna101583	A04	823316	G	A	BnaA04g01330D	-248	1	EDT1	24	-	1	0.925	tcATTAAcgg	Gain of TFBS
bna101585	A04	832424	G	T	BnaA04g01340D	42	0	MYB1	20	+	1	0.915	atcaCCGTTtccattttgg	Loss of TFBS
bna101585	A04	832424	G	T	BnaA04g01340D	42	0	MYB3R1	16	+	1	0.915	gtgcatcaCCGTTtc	Loss of TFBS
bna101585	A04	832424	G	T	BnaA04g01340D	42	0	MYB3R4	16	+	1	0.915	gtgcatcaCCGTTtc	Loss of TFBS
bna101585	A04	832424	G	T	BnaA04g01340D	42	0	MYB3R5	15	+	1	0.895	agtgcatcaCCGTTt	Loss of TFBS
bna101585	A04	832424	G	T	BnaA04g01340D	42	0	MYB52	19	+	1	0.95	catcaCCGTTt	Loss of TFBS
bna101585	A04	832424	G	T	BnaA04g01340D	42	0	MYB73	19	-	1	0.968	catcaCCGTTtc	Loss of TFBS
bna101585	A04	832424	G	T	BnaA04g01340D	42	0	MYB77	15	+	0.988	0.903	agtgcatcaCCGTTt	Loss of TFBS
bna101585	A04	832424	G	T	BnaA04g01340D	42	1	Dof2	23	-	0.961	0.961	aCCTTT	Gain of TFBS
bna101585	A04	832424	G	T	BnaA04g01340D	42	1	dof4.2	17	-	1	0.904	tgcatcacCTTTTccattt	Gain of TFBS
bna101585	A04	832424	G	T	BnaA04g01340D	42	1	PBF	24	-	0.969	0.969	CCTTT	Gain of TFBS
bna101586	A04	832446	C	T	BnaA04g01340D	64	0	ARR10	20	-	0.992	0.949	tctTATCT	Loss of TFBS
bna101586	A04	832446	C	T	BnaA04g01340D	64	0	ARR18	19	-	1	0.94	gtctTATCTcttc	Loss of TFBS
bna101586	A04	832446	C	T	BnaA04g01340D	64	0	At1g49010	15	+	1	0.926	ggtcgtcTTATCtct	Loss of TFBS
bna101586	A04	832446	C	T	BnaA04g01340D	64	0	At5g08520	20	-	1	0.938	tcTTATCtcttcg	Loss of TFBS
bna101586	A04	832446	C	T	BnaA04g01340D	64	0	At5g58900	16	-	1	0.948	gtcgtcTTATCtctt	Loss of TFBS
bna101586	A04	832446	C	T	BnaA04g01340D	64	0	KUA1	19	+	1	0.894	gtcTTATCtct	Loss of TFBS
bna101586	A04	832446	C	T	BnaA04g01340D	64	0	SRM1	17	-	1	0.956	tcgtcTTATCtctt	Loss of TFBS
bna101594	A04	867275	T	C	BnaA04g01380D	-251	0	AT3G46070	16	+	1	0.928	gtcgggTCACTtaac	Loss of TFBS
bna101594	A04	867275	T	C	BnaA04g01380D	-251	1	MYB111	23	-	1	0.962	cACCTAac	Gain of TFBS
bna101594	A04	867275	T	C	BnaA04g01380D	-251	1	MYB46	23	-	1	0.985	cACCTAac	Gain of TFBS
bna101594	A04	867275	T	C	BnaA04g01380D	-251	1	MYB3	21	-	1	0.924	gtcACCTAact	Gain of TFBS
bna101594	A04	867275	T	C	BnaA04g01380D	-251	1	MYB55	24	+	1	0.898	ACCTAact	Gain of TFBS
bna101594	A04	867275	T	C	BnaA04g01380D	-251	1	MYB57	21	+	1	0.874	gtcaCCTAActgga	Gain of TFBS
bna101594	A04	867275	T	C	BnaA04g01380D	-251	1	MYB59	23	-	1	0.972	cACCTAac	Gain of TFBS
bna101594	A04	867275	T	C	BnaA04g01380D	-251	1	MYB62	22	-	1	0.962	tcaCCTAActggatg	Gain of TFBS
bna101594	A04	867275	T	C	BnaA04g01380D	-251	1	FaEOBII	22	-	1	0.96	tcaCCTAAct	Gain of TFBS
bna101594	A04	867275	T	C	BnaA04g01380D	-251	1	MYB24	24	-	1	1	aCCTAActg	Gain of TFBS
bna101595	A04	867281	G	C	BnaA04g01380D	-257	0	MYB33	20	+	0.994	0.952	tTAACTggatg	Loss of TFBS
bna101595	A04	867281	G	C	BnaA04g01380D	-257	0	MYB56	16	+	0.957	0.893	tcactTAACTggatg	Loss of TFBS
bna101595	A04	867281	G	C	BnaA04g01380D	-257	0	MYB65	17	+	0.975	0.94	cacttAACTGgat	Loss of TFBS
bna101595	A04	867281	G	C	BnaA04g01380D	-257	0	MYB73	21	+	0.994	0.934	tAACTGgatgg	Loss of TFBS
bna101595	A04	867281	G	C	BnaA04g01380D	-257	0	MYB77	21	-	0.985	0.924	tAACTGgatggttgt	Loss of TFBS
bna101595	A04	867281	G	C	BnaA04g01380D	-257	0	MYB81	20	+	0.998	0.96	ttAACTGgatg	Loss of TFBS
bna101595	A04	867281	G	C	BnaA04g01380D	-257	1	CMTA3	20	-	0.936	0.913	ttaACTCGa	Gain of TFBS
bna101670	A04	954445	G	A	BnaA04g01470D	-58	0	Adof1	15	+	1	0.931	tacgtaaAAAAGgagaacacg	Loss of TFBS
bna101670	A04	954445	G	A	BnaA04g01470D	-58	0	AP1	18	+	1	0.868	gtAAAAAaggaga	Loss of TFBS
bna101670	A04	954445	G	A	BnaA04g01470D	-58	0	AT2G28810	20	-	1	0.91	aaAAAAGgagaacacgaaact	Loss of TFBS
bna101670	A04	954445	G	A	BnaA04g01470D	-58	0	AT3G45610	12	-	1	0.936	tattacgtaaAAAAGgaga	Loss of TFBS
bna101670	A04	954445	G	A	BnaA04g01470D	-58	0	AT3G52440	20	+	1	0.96	aaAAAAGgaga	Loss of TFBS
bna101670	A04	954445	G	A	BnaA04g01470D	-58	0	AT5G02460	20	+	1	0.885	aaAAAAGgagaacacgaaact	Loss of TFBS
bna101670	A04	954445	G	A	BnaA04g01470D	-58	0	AT5G66940	14	-	1	0.882	ttacgtaaAAAAGgagaacacgaaacttt	Loss of TFBS
bna101670	A04	954445	G	A	BnaA04g01470D	-58	0	COG1	12	+	1	0.912	tattacgtaaAAAAGgagaac	Loss of TFBS
bna101670	A04	954445	G	A	BnaA04g01470D	-58	0	DAG2	20	+	1	0.955	aaAAAAGgaga	Loss of TFBS
bna101670	A04	954445	G	A	BnaA04g01470D	-58	0	Dof2	23	+	0.961	0.961	AAAGGa	Loss of TFBS
bna101670	A04	954445	G	A	BnaA04g01470D	-58	0	Dof3	23	+	0.977	0.97	AAAGGa	Loss of TFBS
bna101670	A04	954445	G	A	BnaA04g01470D	-58	0	dof4.2	16	+	1	0.955	acgtaaAAAAGgagaacac	Loss of TFBS
bna101670	A04	954445	G	A	BnaA04g01470D	-58	0	OBP1	21	-	1	0.944	aAAAAGgagaacacgaaactt	Loss of TFBS
bna101670	A04	954445	G	A	BnaA04g01470D	-58	0	OBP4	20	+	1	0.959	aaAAAAGgagaaca	Loss of TFBS
bna101670	A04	954445	G	A	BnaA04g01470D	-58	0	PBF	23	+	0.969	0.969	AAAGG	Loss of TFBS
bna101670	A04	954445	G	A	BnaA04g01470D	-58	1	AT2G28810	21	-	1	0.935	aaAAAAGagaacacgaaactt	Gain of TFBS
bna101670	A04	954445	G	A	BnaA04g01470D	-58	1	Dof3	24	+	0.968	0.969	AAAGAg	Gain of TFBS
bna101670	A04	954445	G	A	BnaA04g01470D	-58	1	Dof2	24	+	0.965	0.963	AAAGAg	Gain of TFBS
bna101670	A04	954445	G	A	BnaA04g01470D	-58	1	MNB1A	24	+	0.97	0.97	AAAGA	Gain of TFBS
bna101670	A04	954445	G	A	BnaA04g01470D	-58	1	COG1	13	+	1	0.915	attacgtaaaAAAAGagaaca	Gain of TFBS
bna101670	A04	954445	G	A	BnaA04g01470D	-58	1	DAG2	21	+	1	0.962	aaAAAAGagaa	Gain of TFBS
bna101670	A04	954445	G	A	BnaA04g01470D	-58	1	dof4.2	17	+	1	0.9	cgtaaaAAAAGagaacacg	Gain of TFBS
bna101670	A04	954445	G	A	BnaA04g01470D	-58	1	PBF	24	+	0.969	0.969	AAAGA	Gain of TFBS
bna101670	A04	954445	G	A	BnaA04g01470D	-58	1	OBP1	22	-	1	0.945	aAAAAGagaacacgaaacttt	Gain of TFBS
bna101670	A04	954445	G	A	BnaA04g01470D	-58	1	OBP4	21	+	1	0.951	aaAAAAGagaacac	Gain of TFBS
bna101670	A04	954445	G	A	BnaA04g01470D	-58	1	AT5G02460	21	+	1	0.913	aaAAAAGagaacacgaaactt	Gain of TFBS
bna101670	A04	954445	G	A	BnaA04g01470D	-58	1	AT5G66940	15	-	1	0.88	tacgtaaaAAAAGagaacacgaaacttta	Gain of TFBS
bna101670	A04	954445	G	A	BnaA04g01470D	-58	1	CDF3	22	+	1	0.984	aAAAAGaga	Gain of TFBS
bna101671	A04	954461	T	A	BnaA04g01470D	-42	0	AT3G52440	19	-	0.981	0.96	gaaaCTTTAta	Loss of TFBS
bna101671	A04	954461	T	A	BnaA04g01470D	-42	0	Dof2	21	-	0.961	0.961	aACTTT	Loss of TFBS
bna101671	A04	954461	T	A	BnaA04g01470D	-42	0	Dof3	21	-	0.994	0.971	aACTTT	Loss of TFBS
bna101671	A04	954461	T	A	BnaA04g01470D	-42	0	MNB1A	22	-	0.97	0.97	ACTTT	Loss of TFBS
bna101671	A04	954461	T	A	BnaA04g01470D	-42	0	PBF	22	-	0.985	0.985	ACTTT	Loss of TFBS
bna101688	A04	961892	A	G	BnaA04g01480D	-64	0	AT1G69570	15	-	1	0.894	aaactatacaaagactAAAAGtgaaat	Loss of TFBS
bna101688	A04	961892	A	G	BnaA04g01480D	-64	0	Dof2	24	+	0.965	0.964	AAAGAc	Loss of TFBS
bna101688	A04	961892	A	G	BnaA04g01480D	-64	0	Dof3	24	+	0.968	0.961	AAAGAc	Loss of TFBS
bna101688	A04	961892	A	G	BnaA04g01480D	-64	0	MNB1A	24	+	0.97	0.97	AAAGA	Loss of TFBS
bna101688	A04	961892	A	G	BnaA04g01480D	-64	0	OBP3	19	-	1	0.902	tatacaaagactAAAAGtgaa	Loss of TFBS
bna101688	A04	961892	A	G	BnaA04g01480D	-64	0	PBF	24	+	0.969	0.969	AAAGA	Loss of TFBS
bna101707	A04	989135	C	T	BnaA04g01540D	-314	0	ABF4	21	+	1	0.962	tccCACGTtcac	Loss of TFBS
bna101707	A04	989135	C	T	BnaA04g01540D	-314	0	BEE2	22	+	1	0.92	ccCACGTtca	Loss of TFBS
bna101707	A04	989135	C	T	BnaA04g01540D	-314	0	BEE2	22	-	0.913	0.92	cccACGTTca	Loss of TFBS
bna101707	A04	989135	C	T	BnaA04g01540D	-314	0	GBF2	19	-	1	0.902	tctccCACGTtca	Loss of TFBS
bna101707	A04	989135	C	T	BnaA04g01540D	-314	0	SPT	22	+	1	0.944	ccCACGTtc	Loss of TFBS
bna101708	A04	989414	G	A	BnaA04g01540D	-35	0	Dof2	23	+	0.965	0.965	AAAGAa	Loss of TFBS
bna101708	A04	989414	G	A	BnaA04g01540D	-35	0	Dof3	23	+	0.968	0.961	AAAGAa	Loss of TFBS
bna101708	A04	989414	G	A	BnaA04g01540D	-35	0	dof4.5	20	+	1	0.877	aaAAAAGaactaat	Loss of TFBS
bna101708	A04	989414	G	A	BnaA04g01540D	-35	0	MNB1A	23	+	0.97	0.97	AAAGA	Loss of TFBS
bna101708	A04	989414	G	A	BnaA04g01540D	-35	0	PBF	23	+	0.969	0.969	AAAGA	Loss of TFBS
bna101709	A04	989455	G	A	BnaA04g01540D	6	0	abi4	24	+	1	0.93	CGGTGctcat	Loss of TFBS
bna101709	A04	989455	G	A	BnaA04g01540D	6	0	AT1G22810	16	+	1	0.908	gatcatggCGGTGct	Loss of TFBS
bna101709	A04	989455	G	A	BnaA04g01540D	6	0	AT1G36060	19	+	1	0.937	catggCGGTGctca	Loss of TFBS
bna101709	A04	989455	G	A	BnaA04g01540D	6	0	AT1G44830	21	-	1	0.91	tggCGGTGctcatgg	Loss of TFBS
bna101709	A04	989455	G	A	BnaA04g01540D	6	0	AT1G77640	10	+	1	0.95	aagcacgatcatggCGGTGct	Loss of TFBS
bna101709	A04	989455	G	A	BnaA04g01540D	6	0	AT4G16750	20	-	0.955	0.933	atGGCGGtgctcatg	Loss of TFBS
bna101709	A04	989455	G	A	BnaA04g01540D	6	0	AT4G28140	22	+	1	0.929	ggCGGTGctcatggcttcaa	Loss of TFBS
bna101709	A04	989455	G	A	BnaA04g01540D	6	0	CEJ1	21	-	1	0.948	tggCGGTGctcatgg	Loss of TFBS
bna101709	A04	989455	G	A	BnaA04g01540D	6	0	DRE1C	20	+	0.8	0.862	ATGGCggt	Loss of TFBS
bna101709	A04	989455	G	A	BnaA04g01540D	6	0	DREB19	18	-	0.943	0.94	tcatGGCGGtgctcatg	Loss of TFBS
bna101709	A04	989455	G	A	BnaA04g01540D	6	0	DREB2	15	+	0.981	0.965	cgatcatGGCGGtgctcatgg	Loss of TFBS
bna101709	A04	989455	G	A	BnaA04g01540D	6	0	DREB26	22	-	1	0.93	ggCGGTGctcatggcttcaa	Loss of TFBS
bna101709	A04	989455	G	A	BnaA04g01540D	6	0	DREB2C	21	-	0.924	0.942	tGGCGGtg	Loss of TFBS
bna101709	A04	989455	G	A	BnaA04g01540D	6	0	ERF008	21	-	0.948	0.947	tggCGGTG	Loss of TFBS
bna101709	A04	989455	G	A	BnaA04g01540D	6	0	ERF015	10	-	1	0.938	aagcacgatcatggCGGTGc	Loss of TFBS
bna101709	A04	989455	G	A	BnaA04g01540D	6	0	ERF015	19	-	1	0.947	catggCGGTGct	Loss of TFBS
bna101709	A04	989455	G	A	BnaA04g01540D	6	0	ERF017	19	+	0.984	0.91	catGGCGGtgctca	Loss of TFBS
bna101709	A04	989455	G	A	BnaA04g01540D	6	0	ERF019	17	-	1	0.926	atcatggCGGTGctc	Loss of TFBS
bna101709	A04	989455	G	A	BnaA04g01540D	6	0	ERF021	18	-	0.947	0.91	tcatGGCGGtgctca	Loss of TFBS
bna101709	A04	989455	G	A	BnaA04g01540D	6	0	PHYPADRAFT_64121	20	+	0.923	0.921	atgGCGGTgctca	Loss of TFBS
bna101709	A04	989455	G	A	BnaA04g01540D	6	0	RAP2-1	17	-	0.907	0.928	atcatGGCGGtgctc	Loss of TFBS
bna101709	A04	989455	G	A	BnaA04g01540D	6	0	RAP21	20	+	1	0.944	atggCGGTGctca	Loss of TFBS
bna101711	A04	989548	C	T	BnaA04g01540D	99	0	AGL55	23	+	1	1	tCACCA	Loss of TFBS
bna101711	A04	989548	C	T	BnaA04g01540D	99	1	AGL42	24	+	1	1	CATCAtc	Gain of TFBS
bna101723	A04	1038582	T	A	BnaA04g01590D	-343	1	AGL27	18	-	1	0.877	actgaaacAGAAAt	Gain of TFBS
bna101738	A04	1047195	C	A	BnaA04g01610D	-329	0	AP1	23	-	1	0.865	tgtcctTTTTTac	Loss of TFBS
bna101738	A04	1047195	C	A	BnaA04g01610D	-329	0	dof4.2	19	-	1	0.945	taagtgtcCTTTTttactt	Loss of TFBS
bna101738	A04	1047195	C	A	BnaA04g01610D	-329	0	OBP1	20	+	0.947	0.909	aagtgtccttttttaCTTTAg	Loss of TFBS
bna101738	A04	1047195	C	A	BnaA04g01610D	-329	1	DAG2	23	-	1	0.958	tgtaCTTTTtt	Gain of TFBS
bna101738	A04	1047195	C	A	BnaA04g01610D	-329	1	AT1G47655	24	-	1	0.987	gtACTTTttta	Gain of TFBS
bna101738	A04	1047195	C	A	BnaA04g01610D	-329	1	DOF2.5	25	-	1	0.984	taCTTTTt	Gain of TFBS
bna101738	A04	1047195	C	A	BnaA04g01610D	-329	1	OBP4	20	-	1	0.95	aagtgtaCTTTTtt	Gain of TFBS
bna101738	A04	1047195	C	A	BnaA04g01610D	-329	1	MNB1A	26	-	0.97	0.97	ACTTT	Gain of TFBS
bna101738	A04	1047195	C	A	BnaA04g01610D	-329	1	SPL8	18	-	0.981	0.938	ataagtGTACTttttt	Gain of TFBS
bna101738	A04	1047195	C	A	BnaA04g01610D	-329	1	SPL8	18	+	1	0.984	ataagTGTACtttttt	Gain of TFBS
bna101738	A04	1047195	C	A	BnaA04g01610D	-329	1	SPL9	21	+	0.993	0.983	agtGTACTttt	Gain of TFBS
bna101738	A04	1047195	C	A	BnaA04g01610D	-329	1	SPL9	20	-	0.953	0.895	aagTGTACttt	Gain of TFBS
bna101738	A04	1047195	C	A	BnaA04g01610D	-329	1	CDF2	24	-	1	0.998	gtaCTTTTtt	Gain of TFBS
bna101738	A04	1047195	C	A	BnaA04g01610D	-329	1	CDF3	24	-	1	0.991	gtaCTTTTt	Gain of TFBS
bna101739	A04	1047245	T	C	BnaA04g01610D	-279	1	ZHD5	18	-	1	0.967	tTTAATaacgt	Gain of TFBS
bna101739	A04	1047245	T	C	BnaA04g01610D	-279	1	MYB56	18	+	1	0.869	tttaaTAACGtagac	Gain of TFBS
bna10177	A01	6430501	C	T	BnaA01g12850D	-451	1	EDT1	24	+	1	0.941	tttTTAATgt	Gain of TFBS
bna101774	A04	1075062	T	C	BnaA04g01660D	-359	0	ATHB-16	21	-	1	0.953	aaTTATTt	Loss of TFBS
bna101774	A04	1075062	T	C	BnaA04g01670D	-399	0	ATHB-16	21	-	1	0.953	aaTTATTt	Loss of TFBS
bna101774	A04	1075062	T	C	BnaA04g01660D	-359	0	ATHB-5	19	+	1	0.941	caaATTATt	Loss of TFBS
bna101774	A04	1075062	T	C	BnaA04g01670D	-399	0	ATHB-5	19	+	1	0.941	caaATTATt	Loss of TFBS
bna101774	A04	1075062	T	C	BnaA04g01660D	-359	0	ATHB53	19	-	1	0.946	caaaTTATTta	Loss of TFBS
bna101774	A04	1075062	T	C	BnaA04g01670D	-399	0	ATHB53	19	-	1	0.946	caaaTTATTta	Loss of TFBS
bna101774	A04	1075062	T	C	BnaA04g01660D	-359	0	HAT5	20	+	1	0.991	aaATTATt	Loss of TFBS
bna101774	A04	1075062	T	C	BnaA04g01670D	-399	0	HAT5	20	+	1	0.991	aaATTATt	Loss of TFBS
bna101774	A04	1075062	T	C	BnaA04g01660D	-359	1	NTL9	22	-	1	0.896	attACTTAc	Gain of TFBS
bna101774	A04	1075062	T	C	BnaA04g01670D	-399	1	NTL9	22	-	1	0.896	attACTTAc	Gain of TFBS
bna101775	A04	1075165	T	A	BnaA04g01660D	-462	0	MYB113	22	+	1	0.929	atatttGTTAT	Loss of TFBS
bna101775	A04	1075165	T	A	BnaA04g01670D	-296	0	MYB113	22	+	1	0.929	atatttGTTAT	Loss of TFBS
bna101775	A04	1075165	T	A	BnaA04g01660D	-462	0	MYB56	22	-	0.943	0.858	atattTGTTAtcagt	Loss of TFBS
bna101775	A04	1075165	T	A	BnaA04g01670D	-296	0	MYB56	22	-	0.943	0.858	atattTGTTAtcagt	Loss of TFBS
bna101777	A04	1075346	T	A	BnaA04g01670D	-115	0	ARF27	21	-	1	0.901	tccTGTCTgatct	Loss of TFBS
bna101777	A04	1075346	T	A	BnaA04g01670D	-115	0	ARF34	19	-	1	0.92	tgtccTGTCTgat	Loss of TFBS
bna1018	A01	611976	C	T	BnaA01g01150D	-278	0	CDF2	25	-	1	0.99	gcgCTTTTtc	Loss of TFBS
bna1019	A01	614826	C	T	BnaA01g01170D	-397	0	ARR2	20	+	1	0.941	atgcATCTTg	Loss of TFBS
bna1019	A01	614826	C	T	BnaA01g01170D	-397	1	MYB33	24	-	1	0.905	attttGGTTAc	Gain of TFBS
bna101939	A04	1093564	C	T	BnaA04g01680D	-494	1	At3g09600	21	+	1	0.923	tgATATTtataa	Gain of TFBS
bna101939	A04	1093564	C	T	BnaA04g01680D	-494	1	RVE1	19	-	1	0.947	aatgATATTtataa	Gain of TFBS
bna101939	A04	1093564	C	T	BnaA04g01680D	-494	1	AT3G10113	19	-	1	0.964	aatgATATTtataat	Gain of TFBS
bna10194	A01	6454882	G	A	BnaA01g12890D	14	1	ATHB-12	21	-	0.952	0.906	cAATTAct	Gain of TFBS
bna101940	A04	1093591	G	A	BnaA04g01680D	-467	1	dof4.5	24	+	1	0.896	gcAAAAGtatattc	Gain of TFBS
bna101940	A04	1093591	G	A	BnaA04g01680D	-467	1	CDF3	25	+	1	0.984	cAAAAGtat	Gain of TFBS
bna101940	A04	1093591	G	A	BnaA04g01680D	-467	1	AT1G47655	23	+	1	0.975	tgcaAAAGTat	Gain of TFBS
bna101941	A04	1093957	A	T	BnaA04g01680D	-101	0	AT3G46070	18	-	1	0.972	caagAGTGAgtaaat	Loss of TFBS
bna101942	A04	1094117	C	A	BnaA04g01680D	59	0	CBF1	21	+	1	0.91	aatcCCGACctt	Loss of TFBS
bna101942	A04	1094117	C	A	BnaA04g01680D	59	0	CBF4	21	-	1	0.911	aatcCCGACcttt	Loss of TFBS
bna101942	A04	1094117	C	A	BnaA04g01680D	59	0	DREB1A	22	-	1	0.946	atcCCGACct	Loss of TFBS
bna101942	A04	1094117	C	A	BnaA04g01680D	59	0	ERF018	24	+	1	0.905	cCCGACct	Loss of TFBS
bna101958	A04	1096630	A	G	BnaA04g01690D	-468	0	Dof2	24	+	0.965	0.965	AAAGAa	Loss of TFBS
bna101958	A04	1096630	A	G	BnaA04g01690D	-468	0	Dof3	24	+	0.968	0.961	AAAGAa	Loss of TFBS
bna101958	A04	1096630	A	G	BnaA04g01690D	-468	0	MNB1A	24	+	0.97	0.97	AAAGA	Loss of TFBS
bna101958	A04	1096630	A	G	BnaA04g01690D	-468	0	PBF	24	+	0.969	0.969	AAAGA	Loss of TFBS
bna101959	A04	1096654	A	C	BnaA04g01690D	-444	1	MYB56	18	+	0.943	0.876	atttaTAACAaattt	Gain of TFBS
bna101959	A04	1096654	A	C	BnaA04g01690D	-444	1	MYB113	22	-	1	0.977	ATAACaaattt	Gain of TFBS
bna101961	A04	1096745	G	A	BnaA04g01690D	-353	1	At5g05790	17	-	1	0.92	catagtGATAAcatg	Gain of TFBS
bna101961	A04	1096745	G	A	BnaA04g01690D	-353	1	At5g58900	19	+	1	0.897	tagtGATAAcatgtg	Gain of TFBS
bna101962	A04	1096889	A	G	BnaA04g01690D	-209	0	At5g05790	17	+	1	0.921	ggctTTATCattatt	Loss of TFBS
bna101962	A04	1096889	A	G	BnaA04g01690D	-209	1	MYB56	20	-	1	0.918	tttatCGTTAttcat	Gain of TFBS
bna101973	A04	1108107	T	C	BnaA04g01710D	-460	0	Dof2	23	-	0.961	0.961	aACTTT	Loss of TFBS
bna101973	A04	1108107	T	C	BnaA04g01710D	-460	0	Dof3	23	-	0.994	0.971	aACTTT	Loss of TFBS
bna101973	A04	1108107	T	C	BnaA04g01710D	-460	0	MNB1A	24	-	0.97	0.97	ACTTT	Loss of TFBS
bna101973	A04	1108107	T	C	BnaA04g01710D	-460	0	PBF	24	-	0.985	0.985	ACTTT	Loss of TFBS
bna101974	A04	1108127	T	C	BnaA04g01710D	-480	0	LEC2	22	+	1	0.96	acCATGCgttg	Loss of TFBS
bna101974	A04	1108127	T	C	BnaA04g01710D	-480	1	ARALYDRAFT_897773	17	+	1	0.875	actggACCAC	Gain of TFBS
bna101974	A04	1108127	T	C	BnaA04g01710D	-480	1	BIM1	21	-	0.972	0.969	gacCACGCgt	Gain of TFBS
bna101974	A04	1108127	T	C	BnaA04g01710D	-480	1	ARALYDRAFT_496250	19	+	1	0.877	tGGACCac	Gain of TFBS
bna101974	A04	1108127	T	C	BnaA04g01710D	-480	1	CMTA2	22	+	1	0.986	accaCGCGT	Gain of TFBS
bna101974	A04	1108127	T	C	BnaA04g01710D	-480	1	CMTA2	25	-	1	0.99	ACGCGttgt	Gain of TFBS
bna101974	A04	1108127	T	C	BnaA04g01710D	-480	1	CMTA3	25	+	1	0.985	aCGCGTtgt	Gain of TFBS
bna101974	A04	1108127	T	C	BnaA04g01710D	-480	1	CMTA3	22	-	1	0.985	accACGCGt	Gain of TFBS
bna101974	A04	1108127	T	C	BnaA04g01710D	-480	1	FHY3	22	+	1	0.889	accACGCGttgt	Gain of TFBS
bna101974	A04	1108127	T	C	BnaA04g01710D	-480	1	CAMTA1	22	-	1	0.947	accACGCGttgt	Gain of TFBS
bna101974	A04	1108127	T	C	BnaA04g01710D	-480	1	CAMTA1	22	+	1	0.893	accaCGCGTtgt	Gain of TFBS
bna101974	A04	1108127	T	C	BnaA04g01710D	-480	1	TCP24	16	+	1	0.891	aactGGACCacg	Gain of TFBS
bna101974	A04	1108127	T	C	BnaA04g01710D	-480	1	TCP4	19	+	1	0.951	tGGACCac	Gain of TFBS
bna101974	A04	1108127	T	C	BnaA04g01710D	-480	1	TCP3	16	+	1	0.87	aactGGACCacgc	Gain of TFBS
bna101986	A04	1112137	C	T	BnaA04g01720D	-407	0	F3A4.140	22	-	1	0.897	ctAACTGttgaaa	Loss of TFBS
bna101986	A04	1112137	C	T	BnaA04g01720D	-407	0	MYB1	14	-	0.936	0.89	ataggtgactAACTGttga	Loss of TFBS
bna101986	A04	1112137	C	T	BnaA04g01720D	-407	0	MYB1	22	+	0.933	0.869	ctaaCTGTTgaaattatgg	Loss of TFBS
bna101986	A04	1112137	C	T	BnaA04g01720D	-407	0	MYB33	22	+	0.994	0.916	cTAACTgttga	Loss of TFBS
bna101986	A04	1112137	C	T	BnaA04g01720D	-407	0	MYB56	18	+	0.957	0.913	gtgacTAACTgttga	Loss of TFBS
bna101986	A04	1112137	C	T	BnaA04g01720D	-407	0	MYB70	23	+	0.994	0.933	tAACTGttgaaatt	Loss of TFBS
bna101986	A04	1112137	C	T	BnaA04g01720D	-407	0	MYB73	23	+	0.994	0.949	tAACTGttgaa	Loss of TFBS
bna101986	A04	1112137	C	T	BnaA04g01720D	-407	0	MYB77	17	+	0.97	0.908	ggtgactaaCTGTTg	Loss of TFBS
bna101986	A04	1112137	C	T	BnaA04g01720D	-407	0	MYB77	23	-	0.985	0.964	tAACTGttgaaatta	Loss of TFBS
bna101986	A04	1112137	C	T	BnaA04g01720D	-407	1	ATHB-12	21	+	0.952	0.905	acTAATTg	Gain of TFBS
bna1020	A01	615078	A	T	BnaA01g01170D	-145	0	ARR10	24	+	1	0.959	AGATCagc	Loss of TFBS
bna1020	A01	615078	A	T	BnaA01g01170D	-145	1	Dof3	22	+	0.994	0.971	AAAGTt	Gain of TFBS
bna102002	A04	1137474	A	C	BnaA04g01760D	-69	1	ATHB-5	25	+	0.981	0.98	gcaATCATt	Gain of TFBS
bna102002	A04	1137474	A	C	BnaA04g01760D	-69	1	ATHB-51	26	-	0.931	0.95	caATCATt	Gain of TFBS
bna102002	A04	1137474	A	C	BnaA04g01760D	-69	1	ATHB-16	26	+	0.984	0.952	cAATCAtt	Gain of TFBS
bna102002	A04	1137474	A	C	BnaA04g01760D	-69	1	ATHB7	23	-	1	0.955	tggcAATCAttaa	Gain of TFBS
bna102002	A04	1137474	A	C	BnaA04g01760D	-69	1	ATHB40	22	+	0.946	0.9	ttggcAATCAttaaagcttca	Gain of TFBS
bna102002	A04	1137474	A	C	BnaA04g01760D	-69	1	HAT2	24	+	1	0.966	ggcAATCAtta	Gain of TFBS
bna102002	A04	1137474	A	C	BnaA04g01760D	-69	1	ZHD3	22	+	0.97	0.942	ttggcaATCATtaa	Gain of TFBS
bna102004	A04	1144872	T	G	BnaA04g01770D	92	0	Dof2	23	-	0.961	0.96	cACTTT	Loss of TFBS
bna102004	A04	1144872	T	G	BnaA04g01780D	-391	0	Dof2	23	-	0.961	0.96	cACTTT	Loss of TFBS
bna102004	A04	1144872	T	G	BnaA04g01770D	92	0	Dof3	23	-	0.994	0.994	cACTTT	Loss of TFBS
bna102004	A04	1144872	T	G	BnaA04g01780D	-391	0	Dof3	23	-	0.994	0.994	cACTTT	Loss of TFBS
bna102004	A04	1144872	T	G	BnaA04g01770D	92	0	MNB1A	24	-	0.97	0.97	ACTTT	Loss of TFBS
bna102004	A04	1144872	T	G	BnaA04g01780D	-391	0	MNB1A	24	-	0.97	0.97	ACTTT	Loss of TFBS
bna102004	A04	1144872	T	G	BnaA04g01770D	92	0	PBF	24	-	0.985	0.985	ACTTT	Loss of TFBS
bna102004	A04	1144872	T	G	BnaA04g01780D	-391	0	PBF	24	-	0.985	0.985	ACTTT	Loss of TFBS
bna102004	A04	1144872	T	G	BnaA04g01770D	92	1	BEE2	21	-	0.913	0.92	cacACGTTag	Gain of TFBS
bna102004	A04	1144872	T	G	BnaA04g01780D	-391	1	BEE2	21	-	0.913	0.92	cacACGTTag	Gain of TFBS
bna102004	A04	1144872	T	G	BnaA04g01770D	92	1	BEE2	21	+	1	0.92	caCACGTtag	Gain of TFBS
bna102004	A04	1144872	T	G	BnaA04g01780D	-391	1	BEE2	21	+	1	0.92	caCACGTtag	Gain of TFBS
bna102004	A04	1144872	T	G	BnaA04g01770D	92	1	CMTA3	19	-	0.957	0.943	ttcACACGt	Gain of TFBS
bna102004	A04	1144872	T	G	BnaA04g01780D	-391	1	CMTA3	19	-	0.957	0.943	ttcACACGt	Gain of TFBS
bna102004	A04	1144872	T	G	BnaA04g01770D	92	1	CMTA2	22	-	0.948	0.94	ACACGttag	Gain of TFBS
bna102004	A04	1144872	T	G	BnaA04g01780D	-391	1	CMTA2	22	-	0.948	0.94	ACACGttag	Gain of TFBS
bna102004	A04	1144872	T	G	BnaA04g01770D	92	1	ABF2	18	+	1	0.948	cttcaCACGTtag	Gain of TFBS
bna102004	A04	1144872	T	G	BnaA04g01780D	-391	1	ABF2	18	+	1	0.948	cttcaCACGTtag	Gain of TFBS
bna102004	A04	1144872	T	G	BnaA04g01770D	92	1	HYH	20	-	1	0.961	tcaCACGTtagt	Gain of TFBS
bna102004	A04	1144872	T	G	BnaA04g01780D	-391	1	HYH	20	-	1	0.961	tcaCACGTtagt	Gain of TFBS
bna102004	A04	1144872	T	G	BnaA04g01770D	92	1	ABI5	20	+	1	0.927	tcaCACGTta	Gain of TFBS
bna102004	A04	1144872	T	G	BnaA04g01780D	-391	1	ABI5	20	+	1	0.927	tcaCACGTta	Gain of TFBS
bna102005	A04	1145335	A	G	BnaA04g01780D	72	0	ABF2	22	+	1	0.952	gccgaCACGTcgt	Loss of TFBS
bna102005	A04	1145335	A	G	BnaA04g01780D	72	0	ARF1	22	+	1	0.957	gCCGACac	Loss of TFBS
bna102005	A04	1145335	A	G	BnaA04g01780D	72	0	ARF2	21	+	1	0.991	agcCGACAcg	Loss of TFBS
bna102005	A04	1145335	A	G	BnaA04g01780D	72	0	ARF29	18	+	1	0.94	gtaagcCGACAcgtc	Loss of TFBS
bna102005	A04	1145335	A	G	BnaA04g01780D	72	0	ARF3	21	-	1	0.962	agCCGACa	Loss of TFBS
bna102005	A04	1145335	A	G	BnaA04g01780D	72	0	ARF35	19	+	1	0.968	taagcCGACAcgtc	Loss of TFBS
bna102005	A04	1145335	A	G	BnaA04g01780D	72	0	ARF5	22	+	1	0.99	gCCGACac	Loss of TFBS
bna102005	A04	1145335	A	G	BnaA04g01780D	72	0	ARF7	19	+	1	0.927	taagCCGACacgtc	Loss of TFBS
bna102005	A04	1145335	A	G	BnaA04g01780D	72	0	ARF8	22	-	1	0.994	gcCGACAcg	Loss of TFBS
bna102005	A04	1145335	A	G	BnaA04g01780D	72	0	CBF1	19	+	1	0.971	taagCCGACacg	Loss of TFBS
bna102005	A04	1145335	A	G	BnaA04g01780D	72	0	CBF2	17	+	1	0.918	ggtaagCCGACacgt	Loss of TFBS
bna102005	A04	1145335	A	G	BnaA04g01780D	72	0	CBF4	19	-	1	0.952	taagCCGACacgt	Loss of TFBS
bna102005	A04	1145335	A	G	BnaA04g01780D	72	0	CMTA2	26	-	0.948	0.938	ACACGtcgt	Loss of TFBS
bna102005	A04	1145335	A	G	BnaA04g01780D	72	0	CMTA3	23	-	0.957	0.943	ccgACACGt	Loss of TFBS
bna102005	A04	1145335	A	G	BnaA04g01780D	72	0	DPBF3	21	+	1	0.864	agccgaCACGTcgtgaa	Loss of TFBS
bna102005	A04	1145335	A	G	BnaA04g01780D	72	0	DRE1C	22	-	0.8	0.862	gccGACAC	Loss of TFBS
bna102005	A04	1145335	A	G	BnaA04g01780D	72	0	DREB1A	20	-	1	0.98	aagCCGACac	Loss of TFBS
bna102005	A04	1145335	A	G	BnaA04g01780D	72	0	DREB1B	19	+	1	0.934	taagCCGACacgtc	Loss of TFBS
bna102005	A04	1145335	A	G	BnaA04g01780D	72	0	DREB1C	18	+	1	0.968	gtaagCCGACacgtc	Loss of TFBS
bna102005	A04	1145335	A	G	BnaA04g01780D	72	0	DREB1G	20	+	1	0.987	aagCCGACac	Loss of TFBS
bna102005	A04	1145335	A	G	BnaA04g01780D	72	0	ERF027	9	+	1	0.945	tcgtttccggtaagCCGACac	Loss of TFBS
bna102005	A04	1145335	A	G	BnaA04g01780D	72	0	ERF027	18	+	1	0.981	gtaagCCGACacgtc	Loss of TFBS
bna102005	A04	1145335	A	G	BnaA04g01780D	72	0	ERF039	20	-	1	0.987	aagCCGACac	Loss of TFBS
bna102005	A04	1145335	A	G	BnaA04g01780D	72	0	ERF039	20	+	1	0.988	aagCCGACacg	Loss of TFBS
bna102005	A04	1145335	A	G	BnaA04g01780D	72	0	ERF043	21	-	1	0.936	agCCGACa	Loss of TFBS
bna102005	A04	1145335	A	G	BnaA04g01780D	72	0	GBF2	22	-	1	0.894	gccgaCACGTcgt	Loss of TFBS
bna102005	A04	1145335	A	G	BnaA04g01780D	72	0	RAP2-10	20	+	1	0.987	aagCCGACacgt	Loss of TFBS
bna102005	A04	1145335	A	G	BnaA04g01780D	72	0	RAP210	17	-	1	0.974	ggtaagCCGACacgt	Loss of TFBS
bna102005	A04	1145335	A	G	BnaA04g01780D	72	1	ERF105	21	+	1	0.929	aGCCGGca	Gain of TFBS
bna102005	A04	1145335	A	G	BnaA04g01780D	72	1	ERF105	21	-	1	0.966	agCCGGCa	Gain of TFBS
bna102005	A04	1145335	A	G	BnaA04g01780D	72	1	ERF13	21	-	0.967	0.948	aGCCGGca	Gain of TFBS
bna102005	A04	1145335	A	G	BnaA04g01780D	72	1	RAP211	21	-	1	0.913	aGCCGGcacgtcgtg	Gain of TFBS
bna102005	A04	1145335	A	G	BnaA04g01780D	72	1	SPT	25	+	1	0.928	ggCACGTcg	Gain of TFBS
bna102005	A04	1145335	A	G	BnaA04g01780D	72	1	ERF096	20	-	0.967	0.957	aagCCGGCac	Gain of TFBS
bna102005	A04	1145335	A	G	BnaA04g01780D	72	1	ERF098	22	-	0.987	0.985	gCCGGCac	Gain of TFBS
bna102005	A04	1145335	A	G	BnaA04g01780D	72	1	ERF112	21	-	0.958	0.933	agcCGGCAcg	Gain of TFBS
bna102005	A04	1145335	A	G	BnaA04g01780D	72	1	ERF6	20	+	1	0.979	aaGCCGGcac	Gain of TFBS
bna102005	A04	1145335	A	G	BnaA04g01780D	72	1	ERF6	20	-	1	0.991	aagCCGGCac	Gain of TFBS
bna102005	A04	1145335	A	G	BnaA04g01780D	72	1	ERF7	19	-	0.985	0.971	taagCCGGCa	Gain of TFBS
bna102005	A04	1145335	A	G	BnaA04g01780D	72	1	ERF069	21	-	0.988	0.981	agcCGGCAc	Gain of TFBS
bna102040	A04	1166342	T	C	BnaA04g01810D	-388	0	Dof2	22	-	0.965	0.963	cTCTTT	Loss of TFBS
bna102040	A04	1166342	T	C	BnaA04g01810D	-388	0	Dof3	22	-	0.968	0.969	cTCTTT	Loss of TFBS
bna102040	A04	1166342	T	C	BnaA04g01810D	-388	0	dof4.5	17	-	1	0.939	aaattctCTTTTaa	Loss of TFBS
bna102040	A04	1166342	T	C	BnaA04g01810D	-388	0	EDT1	24	+	1	0.935	cttTTAATgg	Loss of TFBS
bna102040	A04	1166342	T	C	BnaA04g01810D	-388	0	MNB1A	23	-	0.97	0.97	TCTTT	Loss of TFBS
bna102040	A04	1166342	T	C	BnaA04g01810D	-388	0	OBP1	9	+	1	0.918	tcttttgcaaattctCTTTTa	Loss of TFBS
bna102040	A04	1166342	T	C	BnaA04g01810D	-388	0	PBF	23	-	0.969	0.969	TCTTT	Loss of TFBS
bna102055	A04	1173825	T	A	BnaA04g01820D	6	1	TGA1A	25	+	1	0.975	gACGTCa	Gain of TFBS
bna102055	A04	1173825	T	A	BnaA04g01820D	6	1	TGA2	26	+	1	0.967	aCGTCAtg	Gain of TFBS
bna102055	A04	1173825	T	A	BnaA04g01820D	6	1	TGA1	24	-	1	0.972	cgaCGTCAtgt	Gain of TFBS
bna102055	A04	1173825	T	A	BnaA04g01820D	6	1	TGA5	25	-	1	1	gaCGTCAt	Gain of TFBS
bna102055	A04	1173825	T	A	BnaA04g01820D	6	1	TGA7	24	-	1	0.962	cgaCGTCAtg	Gain of TFBS
bna102055	A04	1173825	T	A	BnaA04g01820D	6	1	TGA6	24	-	1	0.977	cgaCGTCAtg	Gain of TFBS
bna102055	A04	1173825	T	A	BnaA04g01820D	6	1	bZIP14	24	-	1	0.953	cgaCGTCAtg	Gain of TFBS
bna102055	A04	1173825	T	A	BnaA04g01820D	6	1	bZIP910	26	-	1	1	aCGTCAt	Gain of TFBS
bna102077	A04	1187780	C	T	BnaA04g01840D	-400	0	AT1G47655	23	-	1	0.975	atACTTTtcgt	Loss of TFBS
bna102077	A04	1187780	C	T	BnaA04g01840D	-400	0	CDF3	23	-	1	0.986	ataCTTTTc	Loss of TFBS
bna102077	A04	1187780	C	T	BnaA04g01840D	-400	0	Dof2	24	-	0.961	0.961	tACTTT	Loss of TFBS
bna102077	A04	1187780	C	T	BnaA04g01840D	-400	0	Dof3	24	-	0.994	0.986	tACTTT	Loss of TFBS
bna102077	A04	1187780	C	T	BnaA04g01840D	-400	0	MNB1A	25	-	0.97	0.97	ACTTT	Loss of TFBS
bna102077	A04	1187780	C	T	BnaA04g01840D	-400	0	OBP1	11	+	1	0.915	taaatatatattataCTTTTc	Loss of TFBS
bna102077	A04	1187780	C	T	BnaA04g01840D	-400	0	PBF	25	-	0.985	0.985	ACTTT	Loss of TFBS
bna102079	A04	1187836	C	T	BnaA04g01840D	-344	0	Dof2	24	-	0.965	0.965	tTCTTT	Loss of TFBS
bna102079	A04	1187836	C	T	BnaA04g01840D	-344	0	Dof3	24	-	0.968	0.961	tTCTTT	Loss of TFBS
bna102079	A04	1187836	C	T	BnaA04g01840D	-344	0	MNB1A	25	-	0.97	0.97	TCTTT	Loss of TFBS
bna102079	A04	1187836	C	T	BnaA04g01840D	-344	0	PBF	25	-	0.969	0.969	TCTTT	Loss of TFBS
bna102080	A04	1188128	G	C	BnaA04g01840D	-52	0	AGL27	17	-	1	0.865	attaaaagAGAAAc	Loss of TFBS
bna102080	A04	1188128	G	C	BnaA04g01840D	-52	1	AT1G14580	16	-	1	0.897	tattaaaaGACAAacattta	Gain of TFBS
bna102080	A04	1188128	G	C	BnaA04g01840D	-52	1	NUC	16	-	1	0.927	tattaaaaGACAAacattta	Gain of TFBS
bna102080	A04	1188128	G	C	BnaA04g01840D	-52	1	SGR5	17	+	1	0.94	attaaaaGACAAaca	Gain of TFBS
bna102080	A04	1188128	G	C	BnaA04g01840D	-52	1	MGP	16	+	1	0.909	tattaaaaGACAAacattta	Gain of TFBS
bna102080	A04	1188128	G	C	BnaA04g01840D	-52	1	IDD2	16	+	1	0.911	tattaaaaGACAAac	Gain of TFBS
bna102080	A04	1188128	G	C	BnaA04g01840D	-52	1	JKD	16	-	1	0.915	tattaaaaGACAAacattta	Gain of TFBS
bna102080	A04	1188128	G	C	BnaA04g01840D	-52	1	IDD5	16	-	1	0.91	tattaaaaGACAAaca	Gain of TFBS
bna102080	A04	1188128	G	C	BnaA04g01840D	-52	1	IDD4	16	+	1	0.916	tattaaaaGACAAacat	Gain of TFBS
bna102080	A04	1188128	G	C	BnaA04g01840D	-52	1	IDD7	16	+	1	0.916	tattaaaaGACAAacatt	Gain of TFBS
bna102081	A04	1188219	C	T	BnaA04g01840D	39	1	RAV1	22	-	1	0.995	tttaTGTTGcgg	Gain of TFBS
bna102091	A04	1192184	C	T	BnaA04g01850D	-246	1	HMG-1	19	+	1	0.953	GTTGTtttt	Gain of TFBS
bna102092	A04	1192397	A	T	BnaA04g01850D	-33	0	AG	23	+	0.999	0.91	CCTAAtaatga	Loss of TFBS
bna102093	A04	1192456	T	C	BnaA04g01850D	26	1	BEE2	22	-	1	0.92	tgaACGTGgt	Gain of TFBS
bna102093	A04	1192456	T	C	BnaA04g01850D	26	1	BEE2	22	+	0.913	0.92	tgAACGTggt	Gain of TFBS
bna102093	A04	1192456	T	C	BnaA04g01850D	26	1	ABF4	21	-	1	0.962	ttgaACGTGgtt	Gain of TFBS
bna102093	A04	1192456	T	C	BnaA04g01850D	26	1	SPT	23	-	1	0.941	gaACGTGgt	Gain of TFBS
bna102094	A04	1192506	G	A	BnaA04g01850D	76	0	ARALYDRAFT_493022	25	+	0.917	0.92	ggcGCCAC	Loss of TFBS
bna102094	A04	1192506	G	A	BnaA04g01850D	76	0	At1g72010	22	-	0.872	0.875	gttggcGCCACga	Loss of TFBS
bna102094	A04	1192506	G	A	BnaA04g01850D	76	0	E2FA	22	-	1	0.999	gtTGGCGcca	Loss of TFBS
bna102094	A04	1192506	G	A	BnaA04g01850D	76	0	E2FA	24	+	1	0.997	tggCGCCAcg	Loss of TFBS
bna102094	A04	1192506	G	A	BnaA04g01850D	76	0	Glyma19g26560.1	24	+	0.843	0.875	tggcGCCAC	Loss of TFBS
bna102094	A04	1192506	G	A	BnaA04g01850D	76	0	TCP16	23	-	0.8	0.875	ttGGCGCcac	Loss of TFBS
bna102094	A04	1192506	G	A	BnaA04g01850D	76	0	TCP19	23	+	0.904	0.916	ttggcGCCAC	Loss of TFBS
bna102094	A04	1192506	G	A	BnaA04g01850D	76	0	TCP21	20	-	0.864	0.87	tcgttggcGCCACg	Loss of TFBS
bna102094	A04	1192506	G	A	BnaA04g01850D	76	1	WRKY75	22	-	1	0.96	gTTGACgc	Gain of TFBS
bna102094	A04	1192506	G	A	BnaA04g01850D	76	1	WRKY30	19	-	1	0.986	ctcgTTGACg	Gain of TFBS
bna102094	A04	1192506	G	A	BnaA04g01850D	76	1	WRKY31	21	-	1	0.911	cgTTGACgccacgagaggc	Gain of TFBS
bna102094	A04	1192506	G	A	BnaA04g01850D	76	1	WRKY38	21	+	1	0.936	cgTTGACg	Gain of TFBS
bna102094	A04	1192506	G	A	BnaA04g01850D	76	1	WRKY42	11	+	1	0.934	aagctcgtctcgTTGACgcca	Gain of TFBS
bna102094	A04	1192506	G	A	BnaA04g01850D	76	1	WRKY43	20	-	1	0.964	tcgTTGACgc	Gain of TFBS
bna102094	A04	1192506	G	A	BnaA04g01850D	76	1	WRKY45	21	+	1	0.962	cgTTGACg	Gain of TFBS
bna102094	A04	1192506	G	A	BnaA04g01850D	76	1	WRKY47	16	+	1	0.916	cgtctcgTTGACgc	Gain of TFBS
bna102094	A04	1192506	G	A	BnaA04g01850D	76	1	WRKY55	19	+	1	0.896	ctcgTTGACgcc	Gain of TFBS
bna102094	A04	1192506	G	A	BnaA04g01850D	76	1	WRKY12	21	+	1	0.949	cgTTGACg	Gain of TFBS
bna102094	A04	1192506	G	A	BnaA04g01850D	76	1	WRKY15	20	-	1	0.98	tcgTTGACgc	Gain of TFBS
bna102094	A04	1192506	G	A	BnaA04g01850D	76	1	WRKY15	18	-	1	0.969	tctcgTTGACgccacg	Gain of TFBS
bna102094	A04	1192506	G	A	BnaA04g01850D	76	1	WRKY18	21	-	1	0.949	cgTTGACgcc	Gain of TFBS
bna102094	A04	1192506	G	A	BnaA04g01850D	76	1	WRKY6	21	+	1	0.911	cgTTGACgccacgagaggc	Gain of TFBS
bna102094	A04	1192506	G	A	BnaA04g01850D	76	1	WRKY60	20	-	1	0.913	tcgTTGACgcc	Gain of TFBS
bna102094	A04	1192506	G	A	BnaA04g01850D	76	1	WRKY8	21	-	1	0.989	cgTTGACgc	Gain of TFBS
bna102094	A04	1192506	G	A	BnaA04g01850D	76	1	WRKY65	21	-	1	0.883	cgTTGACgcca	Gain of TFBS
bna102094	A04	1192506	G	A	BnaA04g01850D	76	1	WRKY20	19	+	1	0.934	ctcgTTGACgcca	Gain of TFBS
bna102094	A04	1192506	G	A	BnaA04g01850D	76	1	WRKY21	21	-	1	0.986	cgTTGACgcc	Gain of TFBS
bna102094	A04	1192506	G	A	BnaA04g01850D	76	1	WRKY23	21	-	1	0.938	cgTTGACg	Gain of TFBS
bna102094	A04	1192506	G	A	BnaA04g01850D	76	1	WRKY28	20	-	1	0.967	tcgTTGACgcc	Gain of TFBS
bna102098	A04	1196572	A	T	BnaA04g01860D	-97	0	ZHD5	22	-	1	0.951	tTTAATcaacg	Loss of TFBS
bna102111	A04	1203007	T	C	BnaA04g01870D	-25	0	At1g49010	16	+	1	0.929	gacgactTTATCctc	Loss of TFBS
bna102111	A04	1203007	T	C	BnaA04g01870D	-25	0	AT3G10580	19	-	1	0.902	gactTTATCctcgtc	Loss of TFBS
bna102111	A04	1203007	T	C	BnaA04g01870D	-25	0	AT3G52440	17	-	0.981	0.96	acgaCTTTAtc	Loss of TFBS
bna102111	A04	1203007	T	C	BnaA04g01870D	-25	0	At5g08520	21	-	1	0.891	ctTTATCctcgtc	Loss of TFBS
bna102111	A04	1203007	T	C	BnaA04g01870D	-25	0	AT5G56840	19	+	1	0.884	gactTTATCctcgtc	Loss of TFBS
bna102111	A04	1203007	T	C	BnaA04g01870D	-25	0	At5g58900	17	-	1	0.908	acgactTTATCctcg	Loss of TFBS
bna102111	A04	1203007	T	C	BnaA04g01870D	-25	0	KUA1	17	+	1	0.904	acgactTTATCctcg	Loss of TFBS
bna102174	A04	1219048	T	A	BnaA04g01920D	-208	0	MYB113	16	-	0.978	0.906	TTAACagtttt	Loss of TFBS
bna102174	A04	1219048	T	A	BnaA04g01920D	-208	1	PBF	26	+	0.969	0.969	AAAGG	Gain of TFBS
bna102174	A04	1219048	T	A	BnaA04g01920D	-208	1	Dof2	26	+	0.961	0.961	AAAGGt	Gain of TFBS
bna102175	A04	1219074	C	A	BnaA04g01920D	-182	1	PBF	24	+	0.985	0.985	AAAGT	Gain of TFBS
bna102175	A04	1219074	C	A	BnaA04g01920D	-182	1	MNB1A	24	+	0.97	0.97	AAAGT	Gain of TFBS
bna102175	A04	1219074	C	A	BnaA04g01920D	-182	1	Dof3	24	+	0.994	0.971	AAAGTt	Gain of TFBS
bna102175	A04	1219074	C	A	BnaA04g01920D	-182	1	Dof2	24	+	0.961	0.961	AAAGTt	Gain of TFBS
bna102176	A04	1219242	A	T	BnaA04g01920D	-14	0	MYB118	14	+	1	0.895	aacctctgcGTTACttc	Loss of TFBS
bna102176	A04	1219242	A	T	BnaA04g01920D	-14	0	MYB119	18	+	1	0.926	tctgCGTTAct	Loss of TFBS
bna102176	A04	1219242	A	T	BnaA04g01920D	-14	0	MYB98	18	-	1	0.933	tctgcGTTACttcgt	Loss of TFBS
bna102196	A04	1223989	T	G	BnaA04g01930D	66	1	ERF069	22	-	0.988	0.976	tttCGGCAg	Gain of TFBS
bna102198	A04	1224358	T	C	BnaA04g01930D	-303	0	AT2G20110	19	+	1	0.963	tTTTAAattttatat	Loss of TFBS
bna102198	A04	1224358	T	C	BnaA04g01930D	-303	0	TSO1	20	-	1	0.959	TTTAAattttatata	Loss of TFBS
bna102198	A04	1224358	T	C	BnaA04g01930D	-303	1	Dof2	24	-	0.961	0.961	aACTTT	Gain of TFBS
bna102198	A04	1224358	T	C	BnaA04g01930D	-303	1	PBF	25	-	0.985	0.985	ACTTT	Gain of TFBS
bna102198	A04	1224358	T	C	BnaA04g01930D	-303	1	Dof3	24	-	0.994	0.971	aACTTT	Gain of TFBS
bna102198	A04	1224358	T	C	BnaA04g01930D	-303	1	MNB1A	25	-	0.97	0.97	ACTTT	Gain of TFBS
bna102198	A04	1224358	T	C	BnaA04g01930D	-303	1	AT3G52440	22	-	0.981	0.964	taaaCTTTAta	Gain of TFBS
bna1022	A01	616274	G	A	BnaA01g01180D	-105	0	ARR10	25	+	0.976	0.965	AGATGtga	Loss of TFBS
bna102219	A04	1236736	T	A	BnaA04g01950D	-191	0	AGL3	17	+	0.952	0.873	ccctCCAATtattgcaaa	Loss of TFBS
bna102219	A04	1236736	T	A	BnaA04g01950D	-191	0	ATHB-16	23	-	1	0.963	aaTTATTg	Loss of TFBS
bna102219	A04	1236736	T	A	BnaA04g01950D	-191	0	ATHB13	21	-	1	0.993	ccaaTTATTgc	Loss of TFBS
bna102219	A04	1236736	T	A	BnaA04g01950D	-191	0	ATHB20	21	-	1	0.987	ccaATTATtgc	Loss of TFBS
bna102219	A04	1236736	T	A	BnaA04g01950D	-191	0	ATHB53	21	-	1	0.995	ccaaTTATTgc	Loss of TFBS
bna102219	A04	1236736	T	A	BnaA04g01950D	-191	0	ATHB7	21	+	0.926	0.911	ccaaTTATTgcaa	Loss of TFBS
bna102219	A04	1236736	T	A	BnaA04g01950D	-191	0	HAT5	22	+	1	1	caATTATt	Loss of TFBS
bna102219	A04	1236736	T	A	BnaA04g01950D	-191	0	HAT5	20	+	1	0.997	tccaATTATtgc	Loss of TFBS
bna102219	A04	1236736	T	A	BnaA04g01950D	-191	1	ATHB53	21	+	1	0.997	ccAATAAttgc	Gain of TFBS
bna102219	A04	1236736	T	A	BnaA04g01950D	-191	1	ATHB13	21	+	1	0.993	ccAATAAttgc	Gain of TFBS
bna102219	A04	1236736	T	A	BnaA04g01950D	-191	1	ATHB-16	22	+	1	0.963	cAATAAtt	Gain of TFBS
bna102219	A04	1236736	T	A	BnaA04g01950D	-191	1	ATHB20	21	+	1	0.988	ccaATAATtgc	Gain of TFBS
bna102219	A04	1236736	T	A	BnaA04g01950D	-191	1	HAT5	21	-	1	0.989	ccaATAATtgca	Gain of TFBS
bna102219	A04	1236736	T	A	BnaA04g01950D	-191	1	HAT5	23	-	1	1	aATAATtg	Gain of TFBS
bna102232	A04	1241836	T	A	BnaA04g01960D	-305	0	MYB62	17	-	1	0.913	agtCCTAAattctag	Loss of TFBS
bna102232	A04	1241836	T	A	BnaA04g01970D	-32	0	MYB62	17	-	1	0.913	agtCCTAAattctag	Loss of TFBS
bna102232	A04	1241836	T	A	BnaA04g01960D	-305	1	ARR10	22	-	0.996	0.957	taaAATCT	Gain of TFBS
bna102232	A04	1241836	T	A	BnaA04g01970D	-32	1	ARR10	22	-	0.996	0.957	taaAATCT	Gain of TFBS
bna102233	A04	1241849	T	G	BnaA04g01960D	-318	1	CDF2	18	+	1	0.99	gaAAAAGcgt	Gain of TFBS
bna102233	A04	1241849	T	G	BnaA04g01970D	-45	1	CDF2	18	+	1	0.99	gaAAAAGcgt	Gain of TFBS
bna102234	A04	1241988	G	A	BnaA04g01960D	-457	0	SMZ	22	+	0.87	0.91	ccTCGAAc	Loss of TFBS
bna102234	A04	1241988	G	A	BnaA04g01970D	-184	0	SMZ	22	+	0.87	0.91	ccTCGAAc	Loss of TFBS
bna102235	A04	1241995	G	T	BnaA04g01960D	-464	0	AIL7	22	-	1	0.891	CTCGGcagagg	Loss of TFBS
bna102235	A04	1241995	G	T	BnaA04g01970D	-191	0	AIL7	22	-	1	0.891	CTCGGcagagg	Loss of TFBS
bna102235	A04	1241995	G	T	BnaA04g01960D	-464	0	ERF069	21	-	0.988	0.974	actCGGCAg	Loss of TFBS
bna102235	A04	1241995	G	T	BnaA04g01970D	-191	0	ERF069	21	-	0.988	0.974	actCGGCAg	Loss of TFBS
bna102237	A04	1242013	A	T	BnaA04g01960D	-482	1	AGL55	23	-	1	1	TGGTGa	Gain of TFBS
bna102237	A04	1242013	A	T	BnaA04g01970D	-209	1	AGL55	23	-	1	1	TGGTGa	Gain of TFBS
bna102237	A04	1242013	A	T	BnaA04g01960D	-482	1	TGA1	23	+	1	0.937	tggTGACGaaa	Gain of TFBS
bna102237	A04	1242013	A	T	BnaA04g01970D	-209	1	TGA1	23	+	1	0.937	tggTGACGaaa	Gain of TFBS
bna102237	A04	1242013	A	T	BnaA04g01960D	-482	1	TGA7	24	+	1	0.907	ggTGACGaaa	Gain of TFBS
bna102237	A04	1242013	A	T	BnaA04g01970D	-209	1	TGA7	24	+	1	0.907	ggTGACGaaa	Gain of TFBS
bna102239	A04	1244060	G	T	BnaA04g01980D	99	0	AG	16	-	0.999	0.978	tccaatTTAGG	Loss of TFBS
bna102239	A04	1244060	G	T	BnaA04g01980D	99	0	AT1G72740	18	+	1	0.953	caattTAGGGttagg	Loss of TFBS
bna102239	A04	1244060	G	T	BnaA04g01980D	99	0	MYB62	15	+	1	0.914	atccaatTTAGGgtt	Loss of TFBS
bna102239	A04	1244060	G	T	BnaA04g01980D	99	0	P0510F09.23	20	-	1	1	attTAGGGtt	Loss of TFBS
bna102239	A04	1244060	G	T	BnaA04g01980D	99	0	TBP3	20	-	1	0.967	attTAGGGttaggcc	Loss of TFBS
bna102263	A04	1251543	A	G	BnaA04g01990D	-85	0	dof4.2	24	-	1	0.889	agaatcctCTTTTtcctcc	Loss of TFBS
bna102263	A04	1251543	A	G	BnaA04g01990D	-85	0	dof4.5	25	-	1	0.914	gaatcctCTTTTtc	Loss of TFBS
bna102263	A04	1251543	A	G	BnaA04g01990D	-85	1	GATA20	22	+	1	0.887	ataGGATC	Gain of TFBS
bna102266	A04	1251913	G	A	BnaA04g01990D	-455	0	TCP20	22	-	1	0.904	agGTGGGtca	Loss of TFBS
bna102266	A04	1251913	G	A	BnaA04g02000D	-197	0	TCP20	22	-	1	0.904	agGTGGGtca	Loss of TFBS
bna102266	A04	1251913	G	A	BnaA04g01990D	-455	1	MYB46	23	+	1	0.94	ggTAGGTc	Gain of TFBS
bna102266	A04	1251913	G	A	BnaA04g02000D	-197	1	MYB46	23	+	1	0.94	ggTAGGTc	Gain of TFBS
bna102266	A04	1251913	G	A	BnaA04g01990D	-455	1	MYB111	23	+	1	0.969	ggTAGGTc	Gain of TFBS
bna102266	A04	1251913	G	A	BnaA04g02000D	-197	1	MYB111	23	+	1	0.969	ggTAGGTc	Gain of TFBS
bna102266	A04	1251913	G	A	BnaA04g01990D	-455	1	MYB3	22	+	1	0.971	aggTAGGTcag	Gain of TFBS
bna102266	A04	1251913	G	A	BnaA04g02000D	-197	1	MYB3	22	+	1	0.971	aggTAGGTcag	Gain of TFBS
bna102266	A04	1251913	G	A	BnaA04g01990D	-455	1	MYB4	23	+	1	0.976	ggTAGGTc	Gain of TFBS
bna102266	A04	1251913	G	A	BnaA04g02000D	-197	1	MYB4	23	+	1	0.976	ggTAGGTc	Gain of TFBS
bna102267	A04	1251919	G	A	BnaA04g01990D	-461	1	WRKY18	19	+	1	0.996	tggGTCAAaa	Gain of TFBS
bna102267	A04	1251919	G	A	BnaA04g02000D	-191	1	WRKY18	19	+	1	0.996	tggGTCAAaa	Gain of TFBS
bna102267	A04	1251919	G	A	BnaA04g01990D	-461	1	WRKY62	20	+	1	0.9	ggGTCAAa	Gain of TFBS
bna102267	A04	1251919	G	A	BnaA04g02000D	-191	1	WRKY62	20	+	1	0.9	ggGTCAAa	Gain of TFBS
bna102267	A04	1251919	G	A	BnaA04g01990D	-461	1	WRKY60	19	+	1	0.971	tggGTCAAaac	Gain of TFBS
bna102267	A04	1251919	G	A	BnaA04g02000D	-191	1	WRKY60	19	+	1	0.971	tggGTCAAaac	Gain of TFBS
bna102267	A04	1251919	G	A	BnaA04g01990D	-461	1	WRKY63	20	+	1	0.989	ggGTCAAa	Gain of TFBS
bna102267	A04	1251919	G	A	BnaA04g02000D	-191	1	WRKY63	20	+	1	0.989	ggGTCAAa	Gain of TFBS
bna102267	A04	1251919	G	A	BnaA04g01990D	-461	1	WRKY20	18	-	1	0.911	gtggGTCAAaact	Gain of TFBS
bna102267	A04	1251919	G	A	BnaA04g02000D	-191	1	WRKY20	18	-	1	0.911	gtggGTCAAaact	Gain of TFBS
bna102267	A04	1251919	G	A	BnaA04g01990D	-461	1	WRKY25	20	+	1	0.966	ggGTCAAa	Gain of TFBS
bna102267	A04	1251919	G	A	BnaA04g02000D	-191	1	WRKY25	20	+	1	0.966	ggGTCAAa	Gain of TFBS
bna102267	A04	1251919	G	A	BnaA04g01990D	-461	1	WRKY28	19	+	1	0.91	tggGTCAAaac	Gain of TFBS
bna102267	A04	1251919	G	A	BnaA04g02000D	-191	1	WRKY28	19	+	1	0.91	tggGTCAAaac	Gain of TFBS
bna102267	A04	1251919	G	A	BnaA04g01990D	-461	1	WRKY75	20	+	1	0.975	ggGTCAAa	Gain of TFBS
bna102267	A04	1251919	G	A	BnaA04g02000D	-191	1	WRKY75	20	+	1	0.975	ggGTCAAa	Gain of TFBS
bna102267	A04	1251919	G	A	BnaA04g01990D	-461	1	WRKY43	20	+	1	0.977	ggGTCAAaac	Gain of TFBS
bna102267	A04	1251919	G	A	BnaA04g02000D	-191	1	WRKY43	20	+	1	0.977	ggGTCAAaac	Gain of TFBS
bna102267	A04	1251919	G	A	BnaA04g01990D	-461	1	WRKY2	20	+	1	0.989	ggGTCAAa	Gain of TFBS
bna102267	A04	1251919	G	A	BnaA04g02000D	-191	1	WRKY2	20	+	1	0.989	ggGTCAAa	Gain of TFBS
bna102267	A04	1251919	G	A	BnaA04g01990D	-461	1	WRKY8	20	+	1	0.992	ggGTCAAaa	Gain of TFBS
bna102267	A04	1251919	G	A	BnaA04g02000D	-191	1	WRKY8	20	+	1	0.992	ggGTCAAaa	Gain of TFBS
bna102267	A04	1251919	G	A	BnaA04g01990D	-461	1	ZAP1	16	-	1	0.911	aggtggGTCAA	Gain of TFBS
bna102267	A04	1251919	G	A	BnaA04g02000D	-191	1	ZAP1	16	-	1	0.911	aggtggGTCAA	Gain of TFBS
bna102267	A04	1251919	G	A	BnaA04g01990D	-461	1	WRKY15	20	+	1	0.985	ggGTCAAaac	Gain of TFBS
bna102267	A04	1251919	G	A	BnaA04g02000D	-191	1	WRKY15	20	+	1	0.985	ggGTCAAaac	Gain of TFBS
bna102267	A04	1251919	G	A	BnaA04g01990D	-461	1	AT-GTL1	19	+	0.932	0.949	tggGTCAAaact	Gain of TFBS
bna102267	A04	1251919	G	A	BnaA04g02000D	-191	1	AT-GTL1	19	+	0.932	0.949	tggGTCAAaact	Gain of TFBS
bna102269	A04	1251947	C	T	BnaA04g01990D	-489	0	HSFB2A	18	-	0.948	0.873	atTGGAAgcttc	Loss of TFBS
bna102269	A04	1251947	C	T	BnaA04g02000D	-163	0	HSFB2A	18	-	0.948	0.873	atTGGAAgcttc	Loss of TFBS
bna10227	A01	6473489	A	C	BnaA01g12920D	77	1	SPL9	19	-	0.957	0.935	catGGTACaca	Gain of TFBS
bna10227	A01	6473489	A	C	BnaA01g12920D	77	1	SPL9	20	+	0.953	0.905	atgGTACAcat	Gain of TFBS
bna10227	A01	6473489	A	C	BnaA01g12920D	77	1	SPL8	17	-	1	0.944	gtcatgGTACAcataa	Gain of TFBS
bna10227	A01	6473489	A	C	BnaA01g12920D	77	1	SPL8	17	+	0.98	0.911	gtcatGGTACacataa	Gain of TFBS
bna102270	A04	1252172	C	A	BnaA04g02000D	62	1	HAT22	26	-	1	0.99	aaTGATTgca	Gain of TFBS
bna102270	A04	1252172	C	A	BnaA04g02000D	62	1	ATHB18	24	-	1	0.994	aaaATGATtgc	Gain of TFBS
bna102270	A04	1252172	C	A	BnaA04g02000D	62	1	ATHB-5	24	-	1	0.997	aaaaTGATTgca	Gain of TFBS
bna102270	A04	1252172	C	A	BnaA04g02000D	62	1	ATHB-5	26	-	0.981	0.98	aATGATtgc	Gain of TFBS
bna102270	A04	1252172	C	A	BnaA04g02000D	62	1	HAT2	25	-	1	0.979	aaaTGATTgca	Gain of TFBS
bna102270	A04	1252172	C	A	BnaA04g02000D	62	1	ZHD3	24	-	0.97	0.944	aaaATGATtgcaat	Gain of TFBS
bna102270	A04	1252172	C	A	BnaA04g02000D	62	1	ATHB-51	26	+	0.931	0.95	aATGATtg	Gain of TFBS
bna102270	A04	1252172	C	A	BnaA04g02000D	62	1	ATHB4	24	-	1	0.951	aaaATGATtg	Gain of TFBS
bna102270	A04	1252172	C	A	BnaA04g02000D	62	1	ATHB4	25	+	0.999	0.962	aaATGATtgc	Gain of TFBS
bna102270	A04	1252172	C	A	BnaA04g02000D	62	1	ATHB7	24	+	1	0.94	aaaaTGATTgcaa	Gain of TFBS
bna102270	A04	1252172	C	A	BnaA04g02000D	62	1	ATHB-16	26	-	0.984	0.952	aaTGATTg	Gain of TFBS
bna102270	A04	1252172	C	A	BnaA04g02000D	62	1	ATHB40	17	-	0.946	0.909	atatgaaaaaaTGATTgcaat	Gain of TFBS
bna102271	A04	1256004	A	T	BnaA04g02020D	-216	0	ARR10	22	-	0.976	0.941	caaCATCT	Loss of TFBS
bna102271	A04	1256004	A	T	BnaA04g02020D	-216	1	HSFC1	18	+	0.769	0.877	CTAGCaacttc	Gain of TFBS
bna10229	A01	6474781	A	G	BnaA01g12930D	-174	0	MYB56	24	-	0.943	0.855	aaaaaTGTTAattat	Loss of TFBS
bna10229	A01	6474781	A	G	BnaA01g12930D	-174	0	SEP3	20	-	1	0.907	cCAAAAaaatg	Loss of TFBS
bna10229	A01	6474781	A	G	BnaA01g12930D	-174	1	dof4.5	20	+	1	0.882	ccAAAAGaatgtta	Gain of TFBS
bna10229	A01	6474781	A	G	BnaA01g12930D	-174	1	MNB1A	23	+	0.97	0.97	AAAGA	Gain of TFBS
bna10229	A01	6474781	A	G	BnaA01g12930D	-174	1	AT2G40260	22	-	1	0.981	aaaAGAATgttaatt	Gain of TFBS
bna10229	A01	6474781	A	G	BnaA01g12930D	-174	1	PBF	23	+	0.969	0.969	AAAGA	Gain of TFBS
bna10229	A01	6474781	A	G	BnaA01g12930D	-174	1	Dof3	23	+	0.968	0.961	AAAGAa	Gain of TFBS
bna10229	A01	6474781	A	G	BnaA01g12930D	-174	1	Dof2	23	+	0.965	0.965	AAAGAa	Gain of TFBS
bna10232	A01	6481636	G	T	BnaA01g12940D	-411	0	AT1G22810	13	+	1	0.927	aagagtgtCGGTGgt	Loss of TFBS
bna10232	A01	6481636	G	T	BnaA01g12940D	-411	0	AT1G75490	18	-	1	0.926	tgtCGGTGgtgttgt	Loss of TFBS
bna10232	A01	6481636	G	T	BnaA01g12940D	-411	0	AT3G57600	19	-	1	0.87	gtcGGTGGtgt	Loss of TFBS
bna10232	A01	6481636	G	T	BnaA01g12940D	-411	0	ESE3	12	+	0.955	0.868	caagagtgtCGGTGgtgtt	Loss of TFBS
bna10233	A01	6481706	T	G	BnaA01g12940D	-481	0	HMG-I/Y	12	-	1	0.932	tTTTTTtttttttttg	Loss of TFBS
bna10233	A01	6481706	T	G	BnaA01g12940D	-481	1	SEP3	17	+	1	0.906	tttttTTTTGg	Gain of TFBS
bna10233	A01	6481706	T	G	BnaA01g12940D	-481	1	AP1	15	-	1	0.886	ttttttTTTTTgg	Gain of TFBS
bna102354	A04	1291927	G	A	BnaA04g02110D	-480	0	ARR10	25	+	0.992	0.944	AGATAggg	Loss of TFBS
bna102354	A04	1291927	G	A	BnaA04g02110D	-480	0	ARR18	21	+	1	0.94	tcagAGATAgggt	Loss of TFBS
bna102355	A04	1291940	G	A	BnaA04g02110D	-467	0	At1g74840	22	+	1	0.946	tacGGATAaag	Loss of TFBS
bna102355	A04	1291940	G	A	BnaA04g02110D	-467	0	At2g38090	17	+	1	0.879	gggtttacgGATAAagagact	Loss of TFBS
bna102355	A04	1291940	G	A	BnaA04g02110D	-467	0	AT3G10580	20	+	1	0.907	tttacgGATAAagag	Loss of TFBS
bna102355	A04	1291940	G	A	BnaA04g02110D	-467	0	At5g08520	20	+	1	0.907	tttacgGATAAag	Loss of TFBS
bna102355	A04	1291940	G	A	BnaA04g02110D	-467	0	AT5G56840	20	-	1	0.902	tttacgGATAAagag	Loss of TFBS
bna102355	A04	1291940	G	A	BnaA04g02110D	-467	0	At5g58900	22	+	1	0.914	tacgGATAAagagac	Loss of TFBS
bna102355	A04	1291940	G	A	BnaA04g02110D	-467	0	AT5G61620	20	+	1	0.925	tttacGGATAaagag	Loss of TFBS
bna102355	A04	1291940	G	A	BnaA04g02110D	-467	0	KUA1	22	-	1	0.932	tacgGATAAagagac	Loss of TFBS
bna102356	A04	1291984	A	G	BnaA04g02110D	-423	0	ARR2	25	-	1	0.917	tAAGATatga	Loss of TFBS
bna102357	A04	1292198	T	C	BnaA04g02110D	-209	0	WRKY12	23	+	1	0.913	agTTGACt	Loss of TFBS
bna102357	A04	1292198	T	C	BnaA04g02110D	-209	0	WRKY14	21	-	1	0.901	tcagTTGACtcct	Loss of TFBS
bna102357	A04	1292198	T	C	BnaA04g02110D	-209	0	WRKY15	22	-	1	0.992	cagTTGACtc	Loss of TFBS
bna102357	A04	1292198	T	C	BnaA04g02110D	-209	0	WRKY18	23	-	1	0.979	agTTGACtcc	Loss of TFBS
bna102357	A04	1292198	T	C	BnaA04g02110D	-209	0	WRKY2	24	-	1	0.95	gTTGACtc	Loss of TFBS
bna102357	A04	1292198	T	C	BnaA04g02110D	-209	0	WRKY20	21	+	1	0.949	tcagTTGACtcct	Loss of TFBS
bna102357	A04	1292198	T	C	BnaA04g02110D	-209	0	WRKY21	23	-	1	0.996	agTTGACtcc	Loss of TFBS
bna102357	A04	1292198	T	C	BnaA04g02110D	-209	0	WRKY23	23	-	1	0.951	agTTGACt	Loss of TFBS
bna102357	A04	1292198	T	C	BnaA04g02110D	-209	0	WRKY24	22	+	1	0.895	cagTTGACtcctcc	Loss of TFBS
bna102357	A04	1292198	T	C	BnaA04g02110D	-209	0	WRKY25	24	-	1	0.935	gTTGACtc	Loss of TFBS
bna102357	A04	1292198	T	C	BnaA04g02110D	-209	0	WRKY26	21	-	1	0.907	tcagTTGACtcct	Loss of TFBS
bna102357	A04	1292198	T	C	BnaA04g02110D	-209	0	WRKY28	21	+	1	0.93	tcagTTGACtcct	Loss of TFBS
bna102357	A04	1292198	T	C	BnaA04g02110D	-209	0	WRKY28	22	-	1	0.984	cagTTGACtcc	Loss of TFBS
bna102357	A04	1292198	T	C	BnaA04g02110D	-209	0	WRKY29	23	-	1	0.925	agTTGACtcct	Loss of TFBS
bna102357	A04	1292198	T	C	BnaA04g02110D	-209	0	WRKY3	23	-	1	0.929	agTTGACtcct	Loss of TFBS
bna102357	A04	1292198	T	C	BnaA04g02110D	-209	0	WRKY30	21	-	1	0.991	tcagTTGACt	Loss of TFBS
bna102357	A04	1292198	T	C	BnaA04g02110D	-209	0	WRKY31	23	-	1	0.955	agTTGACtcctccgagctt	Loss of TFBS
bna102357	A04	1292198	T	C	BnaA04g02110D	-209	0	WRKY33	23	-	1	0.937	agTTGACtcct	Loss of TFBS
bna102357	A04	1292198	T	C	BnaA04g02110D	-209	0	WRKY38	23	+	1	0.93	agTTGACt	Loss of TFBS
bna102357	A04	1292198	T	C	BnaA04g02110D	-209	0	WRKY42	13	+	1	0.968	ttacgttttcagTTGACtcct	Loss of TFBS
bna102357	A04	1292198	T	C	BnaA04g02110D	-209	0	WRKY43	22	-	1	0.995	cagTTGACtc	Loss of TFBS
bna102357	A04	1292198	T	C	BnaA04g02110D	-209	0	WRKY45	23	+	1	0.907	agTTGACt	Loss of TFBS
bna102357	A04	1292198	T	C	BnaA04g02110D	-209	0	WRKY55	21	+	1	0.943	tcagTTGACtcc	Loss of TFBS
bna102357	A04	1292198	T	C	BnaA04g02110D	-209	0	WRKY57	23	-	1	0.992	agTTGACtcc	Loss of TFBS
bna102357	A04	1292198	T	C	BnaA04g02110D	-209	0	WRKY59	23	-	1	0.95	agTTGACtcctc	Loss of TFBS
bna102357	A04	1292198	T	C	BnaA04g02110D	-209	0	WRKY6	23	+	1	0.949	agTTGACtcctccgagctt	Loss of TFBS
bna102357	A04	1292198	T	C	BnaA04g02110D	-209	0	WRKY60	22	-	1	0.92	cagTTGACtcc	Loss of TFBS
bna102357	A04	1292198	T	C	BnaA04g02110D	-209	0	WRKY62	24	-	1	0.908	gTTGACtc	Loss of TFBS
bna102357	A04	1292198	T	C	BnaA04g02110D	-209	0	WRKY65	23	-	1	0.918	agTTGACtcct	Loss of TFBS
bna102357	A04	1292198	T	C	BnaA04g02110D	-209	0	WRKY70	21	+	1	0.872	tcagTTGACtcct	Loss of TFBS
bna102357	A04	1292198	T	C	BnaA04g02110D	-209	0	WRKY75	24	-	1	0.999	gTTGACtc	Loss of TFBS
bna102357	A04	1292198	T	C	BnaA04g02110D	-209	0	WRKY8	23	-	1	0.997	agTTGACtc	Loss of TFBS
bna102359	A04	1292317	G	A	BnaA04g02110D	-90	0	AG	16	-	1	0.917	actactTTTGG	Loss of TFBS
bna102359	A04	1292317	G	A	BnaA04g02110D	-90	0	AGL15	14	+	0.798	0.872	TTACTacttttgggt	Loss of TFBS
bna102359	A04	1292317	G	A	BnaA04g02110D	-90	0	AGL3	17	-	0.985	0.939	ctactTTTGG	Loss of TFBS
bna102359	A04	1292317	G	A	BnaA04g02110D	-90	0	AGL3	13	-	0.989	0.88	tttactactTTTGGgtca	Loss of TFBS
bna102359	A04	1292317	G	A	BnaA04g02110D	-90	0	AP1	14	-	0.891	0.878	ttactaCTTTTgg	Loss of TFBS
bna102359	A04	1292317	G	A	BnaA04g02110D	-90	0	SEP1	13	-	0.991	0.945	tttactactTTTGGgtca	Loss of TFBS
bna102359	A04	1292317	G	A	BnaA04g02110D	-90	0	SEP3	16	+	1	0.922	actacTTTTGg	Loss of TFBS
bna102359	A04	1292317	G	A	BnaA04g02110D	-90	0	SOC1	12	+	1	0.872	ctttactacTTTTGg	Loss of TFBS
bna102359	A04	1292317	G	A	BnaA04g02110D	-90	0	squamosa	13	-	0.767	0.888	tttaCTACTtttgg	Loss of TFBS
bna102360	A04	1292336	A	G	BnaA04g02110D	-71	0	ARR10	22	-	1	0.998	ccgGATCT	Loss of TFBS
bna102360	A04	1292336	A	G	BnaA04g02110D	-71	0	ARR11	23	-	0.906	0.9	cgGATCTg	Loss of TFBS
bna102360	A04	1292336	A	G	BnaA04g02110D	-71	0	ARR14	22	-	0.975	0.979	ccGGATCt	Loss of TFBS
bna102360	A04	1292336	A	G	BnaA04g02110D	-71	0	ARR2	22	+	0.954	0.946	ccggATCTGa	Loss of TFBS
bna102360	A04	1292336	A	G	BnaA04g02110D	-71	0	GATA19	20	-	0.991	0.929	gaccGGATCtg	Loss of TFBS
bna102360	A04	1292336	A	G	BnaA04g02110D	-71	0	GATA19	23	+	0.991	0.904	cgGATCTgaag	Loss of TFBS
bna102360	A04	1292336	A	G	BnaA04g02110D	-71	0	GATA20	21	+	1	0.901	accGGATC	Loss of TFBS
bna102360	A04	1292336	A	G	BnaA04g02110D	-71	0	OsRR22	21	-	0.923	0.934	accGGATCtg	Loss of TFBS
bna102360	A04	1292336	A	G	BnaA04g02110D	-71	1	CMTA3	22	+	0.928	0.93	cCGGGTctg	Gain of TFBS
bna102361	A04	1292344	A	C	BnaA04g02110D	-63	0	ARR10	24	+	1	0.955	AGATCagt	Loss of TFBS
bna10243	A01	6483190	T	A	BnaA01g12950D	-373	1	AT2G20110	13	+	1	0.928	cTTTAAatttattaa	Gain of TFBS
bna10243	A01	6483190	T	A	BnaA01g12950D	-373	1	SOL1	13	-	1	0.916	ctTTAAAtttattaa	Gain of TFBS
bna10244	A01	6483200	T	C	BnaA01g12950D	-363	0	SOL1	24	-	0.894	0.91	ttTCAAAtttgtaaa	Loss of TFBS
bna10244	A01	6483200	T	C	BnaA01g12950D	-363	0	TCX2	24	-	1	0.937	tttcaAATTTgtaaa	Loss of TFBS
bna10244	A01	6483200	T	C	BnaA01g12950D	-363	0	TSO1	25	-	0.901	0.927	TTCAAatttgtaaaa	Loss of TFBS
bna10244	A01	6483200	T	C	BnaA01g12950D	-363	1	AGL15	23	+	1	0.885	TTTCCaaatttgtaa	Gain of TFBS
bna10244	A01	6483200	T	C	BnaA01g12950D	-363	1	AGL16	23	+	1	0.85	TTTCCaaatttgtaa	Gain of TFBS
bna10244	A01	6483200	T	C	BnaA01g12950D	-363	1	squamosa	22	-	0.787	0.898	gtttCCAAAtttgt	Gain of TFBS
bna10244	A01	6483200	T	C	BnaA01g12950D	-363	1	AGL25	21	+	1	0.924	agTTTCCaaatttgtaaa	Gain of TFBS
bna10244	A01	6483200	T	C	BnaA01g12950D	-363	1	AGL1	22	+	0.997	0.882	gTTTCCaaatttgtaaaa	Gain of TFBS
bna10244	A01	6483200	T	C	BnaA01g12950D	-363	1	AG	22	+	1	0.921	gtttCCAAAtttgtaaaa	Gain of TFBS
bna10246	A01	6483543	A	G	BnaA01g12950D	-20	1	At5g05790	20	-	1	0.926	gaaaggGATAAgaac	Gain of TFBS
bna10246	A01	6483543	A	G	BnaA01g12950D	-20	1	At5g58900	22	+	1	0.96	aaggGATAAgaacga	Gain of TFBS
bna10246	A01	6483543	A	G	BnaA01g12950D	-20	1	At2g38090	17	+	1	0.924	aaggaaaggGATAAgaacgaa	Gain of TFBS
bna10246	A01	6483543	A	G	BnaA01g12950D	-20	1	At1g49010	23	-	1	0.948	aggGATAAgaacgaa	Gain of TFBS
bna10246	A01	6483543	A	G	BnaA01g12950D	-20	1	AT5G56840	20	-	1	0.897	gaaaggGATAAgaac	Gain of TFBS
bna10246	A01	6483543	A	G	BnaA01g12950D	-20	1	At3g11280	21	-	1	0.931	aaaggGATAAgaac	Gain of TFBS
bna10246	A01	6483543	A	G	BnaA01g12950D	-20	1	At5g08520	20	+	1	0.972	gaaaggGATAAga	Gain of TFBS
bna10246	A01	6483543	A	G	BnaA01g12950D	-20	1	SRM1	22	+	1	0.935	aaggGATAAgaacg	Gain of TFBS
bna10246	A01	6483543	A	G	BnaA01g12950D	-20	1	KUA1	23	-	1	0.979	aggGATAAgaa	Gain of TFBS
bna10246	A01	6483543	A	G	BnaA01g12950D	-20	1	KUA1	22	-	1	0.924	aaggGATAAgaacga	Gain of TFBS
bna10246	A01	6483543	A	G	BnaA01g12950D	-20	1	AT3G10580	20	+	1	0.941	gaaaggGATAAgaac	Gain of TFBS
bna102503	A04	1321371	G	A	BnaA04g02120D	-478	0	AT1G69570	6	-	1	0.869	gtggagccaaaaaaaaAAAAGgtcgat	Loss of TFBS
bna102503	A04	1321371	G	A	BnaA04g02120D	-478	0	AT3G45610	12	-	1	0.958	ccaaaaaaaaAAAAGgtcg	Loss of TFBS
bna102503	A04	1321371	G	A	BnaA04g02120D	-478	0	AT3G52440	20	+	1	0.949	aaAAAAGgtcg	Loss of TFBS
bna102503	A04	1321371	G	A	BnaA04g02120D	-478	0	COG1	12	+	1	0.913	ccaaaaaaaaAAAAGgtcgat	Loss of TFBS
bna102503	A04	1321371	G	A	BnaA04g02120D	-478	0	Dof2	23	+	0.961	0.961	AAAGGt	Loss of TFBS
bna102503	A04	1321371	G	A	BnaA04g02120D	-478	0	dof4.2	16	+	1	0.949	aaaaaaAAAAGgtcgattg	Loss of TFBS
bna102503	A04	1321371	G	A	BnaA04g02120D	-478	0	dof4.5	20	+	1	0.917	aaAAAAGgtcgatt	Loss of TFBS
bna102503	A04	1321371	G	A	BnaA04g02120D	-478	0	OBP4	20	+	1	0.944	aaAAAAGgtcgatt	Loss of TFBS
bna102503	A04	1321371	G	A	BnaA04g02120D	-478	0	PBF	23	+	0.969	0.969	AAAGG	Loss of TFBS
bna102503	A04	1321371	G	A	BnaA04g02120D	-478	1	OBP3	11	-	1	0.903	gccaaaaaaaaaAAAAGtcga	Gain of TFBS
bna102503	A04	1321371	G	A	BnaA04g02120D	-478	1	dof4.2	17	+	1	0.898	aaaaaaAAAAGtcgattgt	Gain of TFBS
bna102503	A04	1321371	G	A	BnaA04g02120D	-478	1	OBP4	21	+	1	0.951	aaAAAAGtcgattg	Gain of TFBS
bna102503	A04	1321371	G	A	BnaA04g02120D	-478	1	dof4.5	21	+	1	0.913	aaAAAAGtcgattg	Gain of TFBS
bna102503	A04	1321371	G	A	BnaA04g02120D	-478	1	Adof1	16	+	1	0.932	aaaaaaaAAAAGtcgattgta	Gain of TFBS
bna102503	A04	1321371	G	A	BnaA04g02120D	-478	1	AT3G52440	21	+	1	0.979	aaAAAAGtcga	Gain of TFBS
bna102503	A04	1321371	G	A	BnaA04g02120D	-478	1	CDF2	21	+	1	0.991	aaAAAAGtcg	Gain of TFBS
bna102503	A04	1321371	G	A	BnaA04g02120D	-478	1	CDF3	22	+	1	0.986	aAAAAGtcg	Gain of TFBS
bna102503	A04	1321371	G	A	BnaA04g02120D	-478	1	AT1G69570	7	-	1	0.888	tggagccaaaaaaaaaAAAAGtcgatt	Gain of TFBS
bna102503	A04	1321371	G	A	BnaA04g02120D	-478	1	AT3G45610	13	-	1	0.975	caaaaaaaaaAAAAGtcga	Gain of TFBS
bna102503	A04	1321371	G	A	BnaA04g02120D	-478	1	MNB1A	24	+	0.97	0.97	AAAGT	Gain of TFBS
bna102503	A04	1321371	G	A	BnaA04g02120D	-478	1	Dof2	24	+	0.961	0.961	AAAGTc	Gain of TFBS
bna102503	A04	1321371	G	A	BnaA04g02120D	-478	1	Dof3	24	+	0.994	0.986	AAAGTc	Gain of TFBS
bna102503	A04	1321371	G	A	BnaA04g02120D	-478	1	DOF2.5	22	+	1	0.975	aAAAAGtc	Gain of TFBS
bna102503	A04	1321371	G	A	BnaA04g02120D	-478	1	COG1	13	+	1	0.949	caaaaaaaaaAAAAGtcgatt	Gain of TFBS
bna102503	A04	1321371	G	A	BnaA04g02120D	-478	1	DAG2	21	+	1	0.97	aaAAAAGtcga	Gain of TFBS
bna102503	A04	1321371	G	A	BnaA04g02120D	-478	1	PBF	24	+	0.985	0.985	AAAGT	Gain of TFBS
bna102504	A04	1321494	A	G	BnaA04g02120D	-355	1	MYB56	20	-	1	0.887	atataCGTTAtatat	Gain of TFBS
bna102546	A04	1330641	A	G	BnaA04g02130D	-34	0	At1g49010	22	-	1	0.935	gatGATAAgctacca	Loss of TFBS
bna102546	A04	1330641	A	G	BnaA04g02130D	-34	0	AT3G10580	19	+	1	0.926	gctgatGATAAgcta	Loss of TFBS
bna102546	A04	1330641	A	G	BnaA04g02130D	-34	0	At3g11280	20	-	1	0.93	ctgatGATAAgcta	Loss of TFBS
bna102546	A04	1330641	A	G	BnaA04g02130D	-34	0	At5g05790	19	-	1	0.934	gctgatGATAAgcta	Loss of TFBS
bna102546	A04	1330641	A	G	BnaA04g02130D	-34	0	At5g08520	19	+	1	0.923	gctgatGATAAgc	Loss of TFBS
bna102546	A04	1330641	A	G	BnaA04g02130D	-34	0	At5g58900	21	+	1	0.943	tgatGATAAgctacc	Loss of TFBS
bna102546	A04	1330641	A	G	BnaA04g02130D	-34	0	SRM1	21	+	1	0.945	tgatGATAAgctac	Loss of TFBS
bna102547	A04	1330705	T	C	BnaA04g02130D	-98	0	AT1G13300	19	-	1	0.942	cGAATCttagaagag	Loss of TFBS
bna102547	A04	1330705	T	C	BnaA04g02130D	-98	0	AT2G40260	16	-	0.926	0.926	aaaCGAATcttagaa	Loss of TFBS
bna102547	A04	1330705	T	C	BnaA04g02130D	-98	0	HHO3	19	+	1	0.971	cGAATCttaga	Loss of TFBS
bna102547	A04	1330705	T	C	BnaA04g02130D	-98	0	MYR2	16	+	1	0.979	aaacGAATCttaga	Loss of TFBS
bna102547	A04	1330705	T	C	BnaA04g02130D	-98	0	UIF1	18	-	1	0.995	acGAATCtta	Loss of TFBS
bna102548	A04	1330719	T	A	BnaA04g02130D	-112	0	FaEOBII	21	-	1	0.955	acaCCTAAcc	Loss of TFBS
bna102548	A04	1330719	T	A	BnaA04g02130D	-112	0	MYB1	17	-	0.972	0.867	gagaacacctAACCGgcga	Loss of TFBS
bna102548	A04	1330719	T	A	BnaA04g02130D	-112	0	MYB111	22	-	1	0.962	cACCTAac	Loss of TFBS
bna102548	A04	1330719	T	A	BnaA04g02130D	-112	0	MYB3	20	-	1	0.924	aacACCTAacc	Loss of TFBS
bna102548	A04	1330719	T	A	BnaA04g02130D	-112	0	MYB33	25	+	1	0.907	cTAACCggcga	Loss of TFBS
bna102548	A04	1330719	T	A	BnaA04g02130D	-112	0	MYB33	23	+	1	0.91	acctAACCGgcga	Loss of TFBS
bna102548	A04	1330719	T	A	BnaA04g02130D	-112	0	MYB46	22	-	1	0.985	cACCTAac	Loss of TFBS
bna102548	A04	1330719	T	A	BnaA04g02130D	-112	0	MYB56	21	+	0.944	0.859	acaccTAACCggcga	Loss of TFBS
bna102548	A04	1330719	T	A	BnaA04g02130D	-112	0	MYB59	22	-	1	0.972	cACCTAac	Loss of TFBS
bna102548	A04	1330719	T	A	BnaA04g02130D	-112	0	MYB62	21	-	1	0.927	acaCCTAAccggcga	Loss of TFBS
bna102548	A04	1330719	T	A	BnaA04g02130D	-112	0	MYB65	22	+	1	0.95	cacctAACCGgcg	Loss of TFBS
bna102548	A04	1330719	T	A	BnaA04g02130D	-112	0	MYB77	26	-	1	0.929	tAACCGgcgaggttc	Loss of TFBS
bna102551	A04	1330795	A	G	BnaA04g02130D	-188	0	AT-GTL1	18	+	0.938	0.962	aagGTGAAaaat	Loss of TFBS
bna102551	A04	1330795	A	G	BnaA04g02130D	-188	0	ATHB18	25	-	1	0.941	aaaATGATttc	Loss of TFBS
bna102551	A04	1330795	A	G	BnaA04g02130D	-188	1	ATHB-5	25	+	0.987	0.928	agaATGATt	Gain of TFBS
bna102567	A04	1336153	A	C	BnaA04g02140D	-67	0	BHLH112	23	-	1	0.935	gCAAGTtgg	Loss of TFBS
bna102567	A04	1336153	A	C	BnaA04g02140D	-67	0	bHLH130	22	-	1	0.993	ggCAAGTtggg	Loss of TFBS
bna102567	A04	1336153	A	C	BnaA04g02140D	-67	0	bHLH80	22	+	1	0.982	ggCAAGTtggg	Loss of TFBS
bna102567	A04	1336153	A	C	BnaA04g02140D	-67	1	MYB55	26	-	0.93	0.901	cgtTGGGT	Gain of TFBS
bna102567	A04	1336153	A	C	BnaA04g02140D	-67	1	ABI5	21	+	1	0.916	gggCACGTtg	Gain of TFBS
bna102567	A04	1336153	A	C	BnaA04g02140D	-67	1	BEE2	22	+	1	0.92	ggCACGTtgg	Gain of TFBS
bna102567	A04	1336153	A	C	BnaA04g02140D	-67	1	BEE2	22	-	0.913	0.92	ggcACGTTgg	Gain of TFBS
bna102592	A04	1339941	G	A	BnaA04g02150D	-297	1	ATHB18	20	-	1	0.944	ttaATGATtca	Gain of TFBS
bna102592	A04	1339941	G	A	BnaA04g02150D	-297	1	ATHB18	20	+	0.961	0.941	ttaATGATtca	Gain of TFBS
bna102592	A04	1339941	G	A	BnaA04g02150D	-297	1	HAT1	21	-	1	0.981	taaTGATTca	Gain of TFBS
bna102592	A04	1339941	G	A	BnaA04g02150D	-297	1	ZHD5	19	-	1	0.958	aTTAATgattc	Gain of TFBS
bna102592	A04	1339941	G	A	BnaA04g02150D	-297	1	ATHB-5	20	+	0.987	0.927	ttaATGATt	Gain of TFBS
bna102592	A04	1339941	G	A	BnaA04g02150D	-297	1	ATHB-5	20	-	1	0.942	ttaaTGATTcag	Gain of TFBS
bna102592	A04	1339941	G	A	BnaA04g02150D	-297	1	ATHB-5	22	-	0.981	0.925	aATGATtca	Gain of TFBS
bna102592	A04	1339941	G	A	BnaA04g02150D	-297	1	HAT22	22	-	1	0.961	aaTGATTcag	Gain of TFBS
bna102592	A04	1339941	G	A	BnaA04g02150D	-297	1	ATHB-12	22	+	1	0.914	aaTGATTc	Gain of TFBS
bna102592	A04	1339941	G	A	BnaA04g02150D	-297	1	ATHB-16	21	+	0.97	0.98	tAATGAtt	Gain of TFBS
bna102592	A04	1339941	G	A	BnaA04g02150D	-297	1	ATHB4	20	-	1	0.928	ttaATGATtc	Gain of TFBS
bna102592	A04	1339941	G	A	BnaA04g02150D	-297	1	ATHB4	21	+	0.999	0.956	taATGATtca	Gain of TFBS
bna102592	A04	1339941	G	A	BnaA04g02150D	-297	1	HHO6	19	+	1	0.917	attaatGATTC	Gain of TFBS
bna102651	A04	1359170	G	A	BnaA04g02180D	62	1	PBF	26	+	0.985	0.985	AAAGT	Gain of TFBS
bna102651	A04	1359170	G	A	BnaA04g02180D	62	1	WRKY7	24	-	0.797	0.878	gaaaaGTCGAcgga	Gain of TFBS
bna102651	A04	1359170	G	A	BnaA04g02180D	62	1	MNB1A	26	+	0.97	0.97	AAAGT	Gain of TFBS
bna102651	A04	1359170	G	A	BnaA04g02180D	62	1	CDF3	24	+	1	0.982	gAAAAGtcg	Gain of TFBS
bna102651	A04	1359170	G	A	BnaA04g02180D	62	1	WRKY70	25	-	0.8	0.868	aaaaGTCGAcgga	Gain of TFBS
bna102651	A04	1359170	G	A	BnaA04g02180D	62	1	Dof3	26	+	0.994	0.986	AAAGTc	Gain of TFBS
bna102651	A04	1359170	G	A	BnaA04g02180D	62	1	Dof2	26	+	0.961	0.961	AAAGTc	Gain of TFBS
bna102652	A04	1359338	T	A	BnaA04g02180D	-106	0	OBP1	19	+	1	0.91	aagttggtctggttcCTTTTt	Loss of TFBS
bna102691	A04	1447810	C	A	BnaA04g02220D	-179	0	WRKY15	22	+	1	0.98	gaGTCAAaag	Loss of TFBS
bna102691	A04	1447810	C	A	BnaA04g02220D	-179	0	WRKY18	21	+	1	0.979	tgaGTCAAaa	Loss of TFBS
bna102691	A04	1447810	C	A	BnaA04g02220D	-179	0	WRKY20	20	-	1	0.917	ttgaGTCAAaagg	Loss of TFBS
bna102691	A04	1447810	C	A	BnaA04g02220D	-179	0	WRKY23	23	+	1	0.889	aGTCAAaa	Loss of TFBS
bna102691	A04	1447810	C	A	BnaA04g02220D	-179	0	WRKY28	20	-	1	0.91	ttgaGTCAAaagg	Loss of TFBS
bna102691	A04	1447810	C	A	BnaA04g02220D	-179	0	WRKY28	21	+	1	0.91	tgaGTCAAaag	Loss of TFBS
bna102691	A04	1447810	C	A	BnaA04g02220D	-179	0	WRKY3	20	+	1	0.898	ttgaGTCAAaa	Loss of TFBS
bna102691	A04	1447810	C	A	BnaA04g02220D	-179	0	WRKY33	20	+	1	0.908	ttgaGTCAAaa	Loss of TFBS
bna102691	A04	1447810	C	A	BnaA04g02220D	-179	0	WRKY43	22	+	1	0.99	gaGTCAAaag	Loss of TFBS
bna102691	A04	1447810	C	A	BnaA04g02220D	-179	0	WRKY57	21	+	1	0.981	tgaGTCAAaa	Loss of TFBS
bna102691	A04	1447810	C	A	BnaA04g02220D	-179	0	WRKY59	19	+	1	0.945	gttgaGTCAAaa	Loss of TFBS
bna102691	A04	1447810	C	A	BnaA04g02220D	-179	0	WRKY60	21	+	1	0.903	tgaGTCAAaag	Loss of TFBS
bna102691	A04	1447810	C	A	BnaA04g02220D	-179	0	WRKY75	22	+	1	0.976	gaGTCAAa	Loss of TFBS
bna102691	A04	1447810	C	A	BnaA04g02220D	-179	0	WRKY8	22	+	1	0.991	gaGTCAAaa	Loss of TFBS
bna102691	A04	1447810	C	A	BnaA04g02220D	-179	1	AT3G45610	17	-	1	0.923	aagttgagtaAAAAGgaag	Gain of TFBS
bna102691	A04	1447810	C	A	BnaA04g02220D	-179	1	AT1G76880	21	+	1	0.935	tgaGTAAAaaggaaga	Gain of TFBS
bna102691	A04	1447810	C	A	BnaA04g02220D	-179	1	AT5G66940	19	-	1	0.881	gttgagtaAAAAGgaagaataattgaata	Gain of TFBS
bna102691	A04	1447810	C	A	BnaA04g02220D	-179	1	AT2G28810	25	-	1	0.931	taAAAAGgaagaataattgaa	Gain of TFBS
bna102691	A04	1447810	C	A	BnaA04g02220D	-179	1	DAG2	25	+	1	0.967	taAAAAGgaag	Gain of TFBS
bna102691	A04	1447810	C	A	BnaA04g02220D	-179	1	AT3G52440	25	+	1	0.968	taAAAAGgaag	Gain of TFBS
bna102691	A04	1447810	C	A	BnaA04g02220D	-179	1	dof4.5	25	+	1	0.88	taAAAAGgaagaat	Gain of TFBS
bna102691	A04	1447810	C	A	BnaA04g02220D	-179	1	OBP4	25	+	1	0.975	taAAAAGgaagaat	Gain of TFBS
bna102691	A04	1447810	C	A	BnaA04g02220D	-179	1	AT5G02460	25	+	1	0.889	taAAAAGgaagaataattgaa	Gain of TFBS
bna102691	A04	1447810	C	A	BnaA04g02220D	-179	1	Adof1	20	+	1	0.937	ttgagtaAAAAGgaagaataa	Gain of TFBS
bna102692	A04	1447985	A	G	BnaA04g02220D	-4	1	ERF069	22	-	1	0.986	attCGGCGa	Gain of TFBS
bna102692	A04	1447985	A	G	BnaA04g02220D	-4	1	ERF112	22	-	1	0.924	attCGGCGat	Gain of TFBS
bna102693	A04	1448006	G	A	BnaA04g02220D	17	1	Dof3	26	+	0.968	0.961	AAAGAa	Gain of TFBS
bna102693	A04	1448006	G	A	BnaA04g02220D	17	1	Dof2	26	+	0.965	0.965	AAAGAa	Gain of TFBS
bna102693	A04	1448006	G	A	BnaA04g02220D	17	1	MNB1A	26	+	0.97	0.97	AAAGA	Gain of TFBS
bna102693	A04	1448006	G	A	BnaA04g02220D	17	1	PBF	26	+	0.969	0.969	AAAGA	Gain of TFBS
bna10271	A01	6500700	C	T	BnaA01g12970D	-398	0	MYB3R5	23	-	1	0.885	cAACGGaggcattca	Loss of TFBS
bna102710	A04	1451050	A	G	BnaA04g02230D	-463	0	ARR2	24	-	0.954	0.929	aGAGATtcac	Loss of TFBS
bna102710	A04	1451050	A	G	BnaA04g02230D	-463	0	AT3G24120	25	-	1	0.976	gaGATTCa	Loss of TFBS
bna102712	A04	1451571	G	T	BnaA04g02230D	58	0	SPL8	20	+	0.98	0.941	tttttGGTACtagtat	Loss of TFBS
bna102712	A04	1451571	G	T	BnaA04g02230D	58	0	SPL8	20	-	0.981	0.923	tttttgGTACTagtat	Loss of TFBS
bna102712	A04	1451571	G	T	BnaA04g02230D	58	0	SPL9	22	-	0.957	0.905	tttGGTACtag	Loss of TFBS
bna102712	A04	1451571	G	T	BnaA04g02230D	58	0	SPL9	23	+	0.993	0.94	ttgGTACTagt	Loss of TFBS
bna102712	A04	1451571	G	T	BnaA04g02230D	58	1	MYB113	19	+	0.986	0.916	gtttttGTTAC	Gain of TFBS
bna102753	A04	1461106	C	T	BnaA04g02250D	-116	0	ERF069	20	-	0.988	0.975	gttCGGCAg	Loss of TFBS
bna102753	A04	1461106	C	T	BnaA04g02250D	-116	1	MYB24	18	+	0.973	0.975	tggTTCGGt	Gain of TFBS
bna102753	A04	1461106	C	T	BnaA04g02250D	-116	1	MYB46	20	+	0.874	0.904	gtTCGGTa	Gain of TFBS
bna102753	A04	1461106	C	T	BnaA04g02250D	-116	1	FaEOBII	19	+	0.898	0.917	ggTTCGGtag	Gain of TFBS
bna102754	A04	1461157	A	T	BnaA04g02250D	-167	0	ARR10	22	-	0.996	0.958	caaAATCT	Loss of TFBS
bna102754	A04	1461157	A	T	BnaA04g02250D	-167	1	NAC029	16	+	1	0.883	ttgACGCAaattc	Gain of TFBS
bna102755	A04	1461207	C	T	BnaA04g02250D	-217	1	MYB57	15	+	1	0.865	tataCCTAAactaa	Gain of TFBS
bna102756	A04	1461367	T	A	BnaA04g02250D	-377	1	dof4.5	25	-	1	0.877	tatttccCTTTTtg	Gain of TFBS
bna102757	A04	1461407	C	T	BnaA04g02250D	-417	0	MYB33	19	+	1	0.971	gaatAACCGttgt	Loss of TFBS
bna102757	A04	1461407	C	T	BnaA04g02250D	-417	0	MYB3R1	17	+	1	0.958	tagaataaCCGTTgt	Loss of TFBS
bna102757	A04	1461407	C	T	BnaA04g02250D	-417	0	MYB3R4	17	+	1	0.972	tagaataaCCGTTgt	Loss of TFBS
bna102757	A04	1461407	C	T	BnaA04g02250D	-417	0	MYB3R5	16	+	1	0.957	ttagaataaCCGTTg	Loss of TFBS
bna102757	A04	1461407	C	T	BnaA04g02250D	-417	0	MYB52	20	+	1	0.945	aataaCCGTTg	Loss of TFBS
bna102757	A04	1461407	C	T	BnaA04g02250D	-417	0	MYB70	21	+	1	0.996	atAACCGttgt	Loss of TFBS
bna102757	A04	1461407	C	T	BnaA04g02250D	-417	0	MYB73	20	-	1	0.978	aataaCCGTTgt	Loss of TFBS
bna102758	A04	1461432	A	T	BnaA04g02250D	-442	0	At2g38090	8	+	1	0.873	aaaatcgaaGATAAatctaac	Loss of TFBS
bna102758	A04	1461432	A	T	BnaA04g02250D	-442	1	ARR2	18	+	1	0.893	ataaATCTTa	Gain of TFBS
bna102761	A04	1462151	T	C	BnaA04g02260D	92	1	abi4	26	+	1	0.91	CGGTGcagga	Gain of TFBS
bna102761	A04	1462151	T	C	BnaA04g02260D	92	1	TCP1	17	+	0.867	0.85	aGCGGGtcccggtgcaggagctccggcttc	Gain of TFBS
bna102761	A04	1462151	T	C	BnaA04g02260D	92	1	Glyma19g26560.1	18	-	0.837	0.872	GCGGGtccc	Gain of TFBS
bna102762	A04	1462187	A	G	BnaA04g02260D	56	0	bZIP52	21	+	1	0.915	atGACAGcggtcat	Loss of TFBS
bna102762	A04	1462187	A	G	BnaA04g02260D	56	1	ERF017	20	+	1	0.911	catGACGGcggtca	Gain of TFBS
bna102762	A04	1462187	A	G	BnaA04g02260D	56	1	CRF4	23	-	1	0.936	gaCGGCGg	Gain of TFBS
bna102762	A04	1462187	A	G	BnaA04g02260D	56	1	ERF069	22	-	1	0.995	tgaCGGCGg	Gain of TFBS
bna102762	A04	1462187	A	G	BnaA04g02260D	56	1	ERF021	19	-	0.942	0.949	ccatGACGGcggtca	Gain of TFBS
bna102762	A04	1462187	A	G	BnaA04g02260D	56	1	DREB2	19	+	0.981	0.897	ccatgacGGCGGtcatagagg	Gain of TFBS
bna102762	A04	1462187	A	G	BnaA04g02260D	56	1	ERF4	23	-	1	0.964	gaCGGCGg	Gain of TFBS
bna102762	A04	1462187	A	G	BnaA04g02260D	56	1	ERF4	20	-	1	0.997	catgaCGGCGgt	Gain of TFBS
bna102762	A04	1462187	A	G	BnaA04g02260D	56	1	ERF3	22	-	1	0.969	tgaCGGCG	Gain of TFBS
bna102762	A04	1462187	A	G	BnaA04g02260D	56	1	ERF8	20	-	1	0.993	catgaCGGCG	Gain of TFBS
bna102762	A04	1462187	A	G	BnaA04g02260D	56	1	ABR1	14	+	1	0.897	aatagccatgaCGGCGgtc	Gain of TFBS
bna102762	A04	1462187	A	G	BnaA04g02260D	56	1	ERF7	20	-	0.991	0.991	catgACGGCg	Gain of TFBS
bna102762	A04	1462187	A	G	BnaA04g02260D	56	1	AT1G75490	22	-	0.942	0.864	tgaCGGCGgtcatag	Gain of TFBS
bna102762	A04	1462187	A	G	BnaA04g02260D	56	1	AT4G28140	23	+	0.966	0.937	gaCGGCGgtcatagaggcag	Gain of TFBS
bna102762	A04	1462187	A	G	BnaA04g02260D	56	1	ERF087	22	+	1	0.89	tgaCGGCGgtcatag	Gain of TFBS
bna102762	A04	1462187	A	G	BnaA04g02260D	56	1	ERF104	20	-	0.895	0.871	catGACGGcggtcatagag	Gain of TFBS
bna102762	A04	1462187	A	G	BnaA04g02260D	56	1	DRE1C	21	+	0.8	0.862	ATGACggc	Gain of TFBS
bna102762	A04	1462187	A	G	BnaA04g02260D	56	1	RAP211	22	-	0.978	0.957	tGACGGcggtcatag	Gain of TFBS
bna102762	A04	1462187	A	G	BnaA04g02260D	56	1	ERF096	21	-	0.968	0.975	atgACGGCgg	Gain of TFBS
bna102762	A04	1462187	A	G	BnaA04g02260D	56	1	ERF098	23	-	0.988	0.989	gACGGCgg	Gain of TFBS
bna102762	A04	1462187	A	G	BnaA04g02260D	56	1	ERF008	22	-	1	0.96	tgaCGGCG	Gain of TFBS
bna102762	A04	1462187	A	G	BnaA04g02260D	56	1	ERF112	22	-	1	0.986	tgaCGGCGgt	Gain of TFBS
bna102762	A04	1462187	A	G	BnaA04g02260D	56	1	ERF13	22	-	0.964	0.972	tGACGGcg	Gain of TFBS
bna102762	A04	1462187	A	G	BnaA04g02260D	56	1	RAP21	21	+	0.937	0.909	atgaCGGCGgtca	Gain of TFBS
bna102762	A04	1462187	A	G	BnaA04g02260D	56	1	RAP26	22	+	1	0.884	tgaCGGCGgtcatag	Gain of TFBS
bna102762	A04	1462187	A	G	BnaA04g02260D	56	1	AT4G16750	21	-	0.951	0.918	atGACGGcggtcata	Gain of TFBS
bna102764	A04	1462453	G	A	BnaA04g02260D	-210	1	ATHB53	20	+	1	0.967	aaAATAAttgc	Gain of TFBS
bna102764	A04	1462453	G	A	BnaA04g02260D	-210	1	ATHB18	20	-	0.991	0.988	aaaATAATtgc	Gain of TFBS
bna102764	A04	1462453	G	A	BnaA04g02260D	-210	1	ZHD3	20	-	0.997	0.96	aaaATAATtgcaat	Gain of TFBS
bna102764	A04	1462453	G	A	BnaA04g02260D	-210	1	HAT5	22	-	1	1	aATAATtg	Gain of TFBS
bna102764	A04	1462453	G	A	BnaA04g02260D	-210	1	ATHB-51	22	+	0.98	0.985	aATAATtg	Gain of TFBS
bna102764	A04	1462453	G	A	BnaA04g02260D	-210	1	ATHB-5	22	-	1	0.993	aATAATtgc	Gain of TFBS
bna102764	A04	1462453	G	A	BnaA04g02260D	-210	1	ATHB-5	20	-	0.905	0.929	aaaaTAATTgca	Gain of TFBS
bna102764	A04	1462453	G	A	BnaA04g02260D	-210	1	ATHB-12	22	+	0.952	0.96	aaTAATTg	Gain of TFBS
bna102764	A04	1462453	G	A	BnaA04g02260D	-210	1	ATHB-16	21	+	1	0.953	aAATAAtt	Gain of TFBS
bna102764	A04	1462453	G	A	BnaA04g02260D	-210	1	ATHB4	21	+	0.98	0.948	aaATAATtgc	Gain of TFBS
bna102764	A04	1462453	G	A	BnaA04g02260D	-210	1	ATHB4	20	-	0.985	0.94	aaaATAATtg	Gain of TFBS
bna102764	A04	1462453	G	A	BnaA04g02260D	-210	1	ATHB40	13	-	0.968	0.914	tacgttaaaaaTAATTgcaat	Gain of TFBS
bna102764	A04	1462453	G	A	BnaA04g02260D	-210	1	ATHB40	17	+	1	0.896	ttaaaAATAAttgcaatatgt	Gain of TFBS
bna102765	A04	1462729	A	G	BnaA04g02260D	-486	0	MYB56	23	+	0.957	0.858	gggatTAACTattct	Loss of TFBS
bna102765	A04	1462729	A	G	BnaA04g02260D	-486	1	GT-1	24	-	1	0.981	gGGTTAac	Gain of TFBS
bna102766	A04	1462735	T	C	BnaA04g02260D	-492	0	MYB56	17	+	0.957	0.858	gggatTAACTattct	Loss of TFBS
bna102766	A04	1462735	T	C	BnaA04g02260D	-492	1	GT-1	20	+	1	0.958	atTAACCa	Gain of TFBS
bna10278	A01	6509744	A	T	BnaA01g13000D	60	0	Dof2	24	+	0.965	0.964	AAAGAc	Loss of TFBS
bna10278	A01	6509744	A	T	BnaA01g13000D	60	0	Dof3	24	+	0.968	0.961	AAAGAc	Loss of TFBS
bna10278	A01	6509744	A	T	BnaA01g13000D	60	0	MNB1A	24	+	0.97	0.97	AAAGA	Loss of TFBS
bna10278	A01	6509744	A	T	BnaA01g13000D	60	0	PBF	24	+	0.969	0.969	AAAGA	Loss of TFBS
bna10278	A01	6509744	A	T	BnaA01g13000D	60	1	TGA7	24	+	1	0.927	aaTGACGcca	Gain of TFBS
bna102883	A04	1477412	G	A	BnaA04g02270D	-15	0	Dof2	23	+	0.961	0.961	AAAGGa	Loss of TFBS
bna102883	A04	1477412	G	A	BnaA04g02270D	-15	0	Dof3	23	+	0.977	0.97	AAAGGa	Loss of TFBS
bna102883	A04	1477412	G	A	BnaA04g02270D	-15	0	PBF	23	+	0.969	0.969	AAAGG	Loss of TFBS
bna102883	A04	1477412	G	A	BnaA04g02270D	-15	1	dof4.5	21	+	1	0.896	agAAAAGaatagtt	Gain of TFBS
bna102883	A04	1477412	G	A	BnaA04g02270D	-15	1	PBF	24	+	0.969	0.969	AAAGA	Gain of TFBS
bna102883	A04	1477412	G	A	BnaA04g02270D	-15	1	MNB1A	24	+	0.97	0.97	AAAGA	Gain of TFBS
bna102883	A04	1477412	G	A	BnaA04g02270D	-15	1	Dof2	24	+	0.965	0.965	AAAGAa	Gain of TFBS
bna102883	A04	1477412	G	A	BnaA04g02270D	-15	1	Dof3	24	+	0.968	0.961	AAAGAa	Gain of TFBS
bna103053	A04	1508342	G	A	BnaA04g02280D	-125	1	myb.Ph3	24	+	0.997	0.954	aAACTGttt	Gain of TFBS
bna103053	A04	1508342	G	A	BnaA04g02280D	-125	1	myb.Ph3	24	-	0.995	0.953	aaaCTGTTt	Gain of TFBS
bna103053	A04	1508342	G	A	BnaA04g02280D	-125	1	MYB77	24	-	0.985	0.912	aAACTGttttcgata	Gain of TFBS
bna103053	A04	1508342	G	A	BnaA04g02280D	-125	1	MYB1	15	-	0.936	0.876	tgcaaaaataAACTGtttt	Gain of TFBS
bna103054	A04	1508406	C	T	BnaA04g02280D	-189	0	MYB33	22	-	0.994	0.956	tatccAGTTAt	Loss of TFBS
bna103054	A04	1508406	C	T	BnaA04g02280D	-189	0	MYB56	22	-	0.957	0.913	tatccAGTTAtacaa	Loss of TFBS
bna103054	A04	1508406	C	T	BnaA04g02280D	-189	0	MYB65	23	-	0.975	0.942	atcCAGTTataca	Loss of TFBS
bna103054	A04	1508406	C	T	BnaA04g02280D	-189	0	MYB73	21	-	0.994	0.939	ctatcCAGTTa	Loss of TFBS
bna103054	A04	1508406	C	T	BnaA04g02280D	-189	0	MYB77	17	+	0.985	0.93	gaaactatcCAGTTa	Loss of TFBS
bna103054	A04	1508406	C	T	BnaA04g02280D	-189	0	MYB81	22	-	0.998	0.965	tatcCAGTTat	Loss of TFBS
bna103054	A04	1508406	C	T	BnaA04g02280D	-189	1	ANAC050	22	-	1	0.855	tatctagttatACAAG	Gain of TFBS
bna103068	A04	1514202	T	C	BnaA04g02300D	-486	0	AT1G76870	20	-	1	0.935	aaccGGTTTggaag	Loss of TFBS
bna103068	A04	1514202	T	C	BnaA04g02300D	-486	1	MYB113	18	-	0.982	0.904	CTAACcggctt	Gain of TFBS
bna103068	A04	1514202	T	C	BnaA04g02300D	-486	1	DREB2	13	-	0.941	0.89	attctctaaCCGGCttggaag	Gain of TFBS
bna103068	A04	1514202	T	C	BnaA04g02300D	-486	1	ERF069	20	-	0.989	0.977	aacCGGCTt	Gain of TFBS
bna103070	A04	1514434	G	A	BnaA04g02300D	-254	0	bZIP52	20	-	1	0.94	ttgatggCTGTCac	Loss of TFBS
bna103070	A04	1514434	G	A	BnaA04g02300D	-254	1	STZ	25	+	1	0.931	gactgTCACTa	Gain of TFBS
bna103070	A04	1514434	G	A	BnaA04g02300D	-254	1	SIZF2	26	-	1	0.93	acTGTCActa	Gain of TFBS
bna103070	A04	1514434	G	A	BnaA04g02300D	-254	1	SIZF2	25	+	0.959	0.907	gacTGTCAct	Gain of TFBS
bna103071	A04	1514471	T	C	BnaA04g02300D	-217	0	ARR10	23	+	0.976	0.965	AGATGtga	Loss of TFBS
bna103071	A04	1514471	T	C	BnaA04g02300D	-217	1	HYH	21	+	1	0.973	acagACGTGaaa	Gain of TFBS
bna103071	A04	1514471	T	C	BnaA04g02300D	-217	1	MYB113	18	-	0.982	0.916	CTAACagacgt	Gain of TFBS
bna103071	A04	1514471	T	C	BnaA04g02300D	-217	1	F3A4.140	18	-	0.941	0.883	ctAACAGacgtga	Gain of TFBS
bna103071	A04	1514471	T	C	BnaA04g02300D	-217	1	MYB65	15	+	0.97	0.944	aaactAACAGacg	Gain of TFBS
bna103072	A04	1514487	G	T	BnaA04g02300D	-201	0	AG	16	-	1	0.953	accaacTTTGG	Loss of TFBS
bna103072	A04	1514487	G	T	BnaA04g02300D	-201	1	POPTR_0002s00440g	24	+	0.927	0.932	tGTATGg	Gain of TFBS
bna103082	A04	1518638	T	A	BnaA04g02310D	-329	0	AT2G20110	16	-	1	0.932	ttcaaaattTTAAAt	Loss of TFBS
bna103082	A04	1518638	T	A	BnaA04g02310D	-329	0	SOL1	16	+	1	0.92	ttcaaaatTTTAAat	Loss of TFBS
bna103082	A04	1518638	T	A	BnaA04g02310D	-329	0	SOL1	23	-	1	0.932	ttTTAAAtttcgaag	Loss of TFBS
bna103082	A04	1518638	T	A	BnaA04g02310D	-329	0	TCX2	23	-	1	0.969	ttttaAATTTcgaag	Loss of TFBS
bna103082	A04	1518638	T	A	BnaA04g02310D	-329	0	TSO1	24	-	1	0.967	TTTAAatttcgaagt	Loss of TFBS
bna103082	A04	1518638	T	A	BnaA04g02310D	-329	1	AT2G20110	22	+	1	0.913	aTTTAAaatttcgaa	Gain of TFBS
bna103082	A04	1518638	T	A	BnaA04g02310D	-329	1	AT2G20110	15	-	1	0.943	cttcaaaatTTAAAa	Gain of TFBS
bna103082	A04	1518638	T	A	BnaA04g02310D	-329	1	SOL1	22	-	1	0.914	atTTAAAatttcgaa	Gain of TFBS
bna103082	A04	1518638	T	A	BnaA04g02310D	-329	1	SOL1	15	+	1	0.963	cttcaaaaTTTAAaa	Gain of TFBS
bna103082	A04	1518638	T	A	BnaA04g02310D	-329	1	TCX2	15	+	1	0.974	cttcaAAATTtaaaa	Gain of TFBS
bna103107	A04	1522504	T	C	BnaA04g02320D	-216	1	HAT1	21	+	1	0.977	caAATCAtgc	Gain of TFBS
bna103107	A04	1522504	T	C	BnaA04g02320D	-216	1	LEC2	24	+	1	0.986	atCATGCataa	Gain of TFBS
bna103108	A04	1522527	T	G	BnaA04g02320D	-239	1	WRKY8	22	-	1	0.978	gaTTGACga	Gain of TFBS
bna103108	A04	1522527	T	G	BnaA04g02320D	-239	1	WRKY75	23	-	1	0.928	aTTGACga	Gain of TFBS
bna103108	A04	1522527	T	G	BnaA04g02320D	-239	1	WRKY18	22	-	1	0.946	gaTTGACgaa	Gain of TFBS
bna103109	A04	1522536	A	G	BnaA04g02320D	-248	1	F3A4.140	20	-	1	0.892	gaAACTGcctgaa	Gain of TFBS
bna103111	A04	1522677	A	T	BnaA04g02320D	-389	1	AGL27	19	-	0.917	0.868	aaaaaaatCGAAAa	Gain of TFBS
bna103112	A04	1522703	C	T	BnaA04g02320D	-415	1	SEP3	19	-	1	0.931	cCAAAAattga	Gain of TFBS
bna103112	A04	1522703	C	T	BnaA04g02320D	-415	1	FLC	14	+	0.921	0.926	ccaaaccaaaaatTGAAAtgc	Gain of TFBS
bna103112	A04	1522703	C	T	BnaA04g02320D	-415	1	AGL3	15	+	0.989	0.876	caaaCCAAAaattgaaat	Gain of TFBS
bna103112	A04	1522703	C	T	BnaA04g02320D	-415	1	AGL3	19	+	0.985	0.92	CCAAAaattg	Gain of TFBS
bna103112	A04	1522703	C	T	BnaA04g02320D	-415	1	PI	19	+	0.885	0.922	ccaaaaatTGAAAt	Gain of TFBS
bna103113	A04	1522710	G	T	BnaA04g02320D	-422	0	CMTA2	23	+	0.948	0.942	aatgCGTGT	Loss of TFBS
bna103113	A04	1522710	G	T	BnaA04g02320D	-422	1	FLC	7	+	0.921	0.902	ccaaaccaaaaacTGAAAttc	Gain of TFBS
bna103114	A04	1522736	A	C	BnaA04g02320D	-448	1	Dof2	24	-	0.961	0.961	tACTTT	Gain of TFBS
bna103114	A04	1522736	A	C	BnaA04g02320D	-448	1	Dof3	24	-	0.994	0.986	tACTTT	Gain of TFBS
bna103114	A04	1522736	A	C	BnaA04g02320D	-448	1	MNB1A	25	-	0.97	0.97	ACTTT	Gain of TFBS
bna103114	A04	1522736	A	C	BnaA04g02320D	-448	1	AT1G47655	23	-	1	0.975	atACTTTtata	Gain of TFBS
bna103114	A04	1522736	A	C	BnaA04g02320D	-448	1	PBF	25	-	0.985	0.985	ACTTT	Gain of TFBS
bna103114	A04	1522736	A	C	BnaA04g02320D	-448	1	CDF3	23	-	1	0.985	ataCTTTTa	Gain of TFBS
bna103148	A04	1529648	C	G	BnaA04g02340D	-122	1	At3g11280	16	-	1	0.921	ttccaGATAAgtta	Gain of TFBS
bna103148	A04	1529648	C	G	BnaA04g02340D	-122	1	At5g08520	15	+	1	0.941	tttccaGATAAgt	Gain of TFBS
bna103148	A04	1529648	C	G	BnaA04g02340D	-122	1	ARR10	20	+	0.992	0.948	AGATAagt	Gain of TFBS
bna103148	A04	1529648	C	G	BnaA04g02340D	-122	1	ARR18	16	+	1	0.942	ttccAGATAagtt	Gain of TFBS
bna103148	A04	1529648	C	G	BnaA04g02340D	-122	1	AT3G10580	15	+	1	0.932	tttccaGATAAgtta	Gain of TFBS
bna103148	A04	1529648	C	G	BnaA04g02340D	-122	1	At5g05790	15	-	1	0.922	tttccaGATAAgtta	Gain of TFBS
bna103148	A04	1529648	C	G	BnaA04g02340D	-122	1	At1g49010	18	-	1	0.934	ccaGATAAgttatat	Gain of TFBS
bna103148	A04	1529648	C	G	BnaA04g02340D	-122	1	SRM1	17	+	1	0.971	tccaGATAAgttat	Gain of TFBS
bna103148	A04	1529648	C	G	BnaA04g02340D	-122	1	KUA1	18	-	1	0.9	ccaGATAAgtt	Gain of TFBS
bna103150	A04	1529865	C	T	BnaA04g02340D	-339	0	BIM1	23	+	0.972	0.969	ccGCGTGgtt	Loss of TFBS
bna103150	A04	1529865	C	T	BnaA04g02340D	-339	0	CAMTA1	20	+	1	0.933	gaccCGCGTggt	Loss of TFBS
bna103150	A04	1529865	C	T	BnaA04g02340D	-339	1	BIM1	21	+	0.966	0.964	acCCGTGtgg	Gain of TFBS
bna103151	A04	1529965	C	T	BnaA04g02340D	-439	0	ARR11	20	+	0.906	0.933	aAGATCcg	Loss of TFBS
bna103151	A04	1529965	C	T	BnaA04g02340D	-439	0	ARR14	21	+	0.975	0.979	aGATCCgg	Loss of TFBS
bna103151	A04	1529965	C	T	BnaA04g02340D	-439	0	OsRR22	20	+	0.923	0.924	aaGATCCgga	Loss of TFBS
bna103151	A04	1529965	C	T	BnaA04g02340D	-439	1	GATA6	20	+	1	0.907	aAGATCtggactg	Gain of TFBS
bna103151	A04	1529965	C	T	BnaA04g02340D	-439	1	GATA9	18	+	1	0.985	aaaAGATCtgg	Gain of TFBS
bna103151	A04	1529965	C	T	BnaA04g02340D	-439	1	GATA9	19	-	1	0.99	aaaGATCTgga	Gain of TFBS
bna103151	A04	1529965	C	T	BnaA04g02340D	-439	1	GATA11	20	+	1	0.98	aaGATCTg	Gain of TFBS
bna103151	A04	1529965	C	T	BnaA04g02340D	-439	1	GATA11	20	-	1	0.944	aAGATCtg	Gain of TFBS
bna103151	A04	1529965	C	T	BnaA04g02340D	-439	1	GATA10	20	+	1	0.964	aAGATCtg	Gain of TFBS
bna103151	A04	1529965	C	T	BnaA04g02340D	-439	1	GATA12	20	-	1	0.995	aaGATCTg	Gain of TFBS
bna103151	A04	1529965	C	T	BnaA04g02340D	-439	1	GATA12	20	+	1	0.995	aAGATCtg	Gain of TFBS
bna103151	A04	1529965	C	T	BnaA04g02340D	-439	1	GATA14	15	-	1	0.937	ttcaaaaGATCTgga	Gain of TFBS
bna103151	A04	1529965	C	T	BnaA04g02340D	-439	1	GATA14	18	+	1	0.949	aaaAGATCtggactg	Gain of TFBS
bna103151	A04	1529965	C	T	BnaA04g02340D	-439	1	ARR10	19	-	1	0.96	aaaGATCT	Gain of TFBS
bna103152	A04	1529999	C	T	BnaA04g02340D	-473	0	SPL8	17	+	0.98	0.941	tttttGGTACaaatat	Loss of TFBS
bna103152	A04	1529999	C	T	BnaA04g02340D	-473	0	SPL8	17	-	1	0.957	tttttgGTACAaatat	Loss of TFBS
bna103152	A04	1529999	C	T	BnaA04g02340D	-473	0	SPL9	19	-	0.957	0.942	tttGGTACaaa	Loss of TFBS
bna103152	A04	1529999	C	T	BnaA04g02340D	-473	0	SPL9	20	+	0.953	0.909	ttgGTACAaat	Loss of TFBS
bna103152	A04	1529999	C	T	BnaA04g02340D	-473	0	squamosa	25	+	0.872	0.918	acaaaTATCGgaac	Loss of TFBS
bna103181	A04	1540714	A	C	BnaA04g02350D	-132	0	SPL8	18	+	1	0.924	agtcaTGTACagtaat	Loss of TFBS
bna103181	A04	1540714	A	C	BnaA04g02350D	-132	0	SPL8	18	-	1	0.93	agtcatGTACAgtaat	Loss of TFBS
bna103181	A04	1540714	A	C	BnaA04g02350D	-132	0	SPL9	20	-	0.953	0.94	tcaTGTACagt	Loss of TFBS
bna103181	A04	1540714	A	C	BnaA04g02350D	-132	0	SPL9	21	+	0.953	0.949	catGTACAgta	Loss of TFBS
bna103181	A04	1540714	A	C	BnaA04g02350D	-132	0	ZHD1	25	-	1	0.962	tacagtAATTAggag	Loss of TFBS
bna103182	A04	1540774	G	T	BnaA04g02350D	-192	0	NAC043	21	+	0.93	0.94	ttaGCGTAat	Loss of TFBS
bna103182	A04	1540774	G	T	BnaA04g02350D	-192	1	dof4.5	13	+	1	0.875	aaAAAAGtttagct	Gain of TFBS
bna103183	A04	1540786	T	G	BnaA04g02350D	-204	0	AT3G46070	20	+	1	0.951	tgcttcTCACTtcca	Loss of TFBS
bna103183	A04	1540786	T	G	BnaA04g02350D	-204	0	MYB1	26	-	0.933	0.868	tcacttccaaAACAGtgag	Loss of TFBS
bna103189	A04	1547634	G	A	BnaA04g02370D	-205	0	MYB98	21	-	1	0.898	actatGTTACaattt	Loss of TFBS
bna10319	A01	6557178	T	A	BnaA01g13070D	-250	0	AGL27	18	+	0.969	0.926	cTTTCCaattttgt	Loss of TFBS
bna10319	A01	6557178	T	A	BnaA01g13070D	-250	0	AP1	19	-	0.88	0.933	tttccaATTTTgt	Loss of TFBS
bna10319	A01	6557178	T	A	BnaA01g13070D	-250	0	FLC	16	-	0.996	0.921	tacTTTCCaattttgtgagtg	Loss of TFBS
bna10319	A01	6557178	T	A	BnaA01g13070D	-250	0	PI	18	-	1	0.927	cTTTCCaattttgt	Loss of TFBS
bna10319	A01	6557178	T	A	BnaA01g13070D	-250	1	AG	18	+	1	0.902	ctttCCAAAtttgtgagt	Gain of TFBS
bna103205	A04	1555189	T	G	BnaA04g02380D	-155	1	Dof3	25	-	1	0.978	aGCTTT	Gain of TFBS
bna103206	A04	1555351	T	A	BnaA04g02380D	-317	1	AHL20	22	-	1	1	atTTAATt	Gain of TFBS
bna103207	A04	1555412	A	T	BnaA04g02380D	-378	1	MYB56	21	+	0.957	0.876	gtgaaTAACTatgat	Gain of TFBS
bna103210	A04	1557101	T	G	BnaA04g02390D	-327	0	AT1G76880	19	-	1	0.924	tttttagtTTTACtgg	Loss of TFBS
bna103210	A04	1557101	T	G	BnaA04g02390D	-327	1	MYB62	15	+	1	0.917	tttttttTTAGGttt	Gain of TFBS
bna103210	A04	1557101	T	G	BnaA04g02390D	-327	1	P0510F09.23	20	-	0.98	0.981	tttTAGGTtt	Gain of TFBS
bna103211	A04	1557109	G	A	BnaA04g02390D	-319	0	AT1G76870	21	-	1	0.985	tactGGTTTtattt	Loss of TFBS
bna103258	A04	1572950	A	T	BnaA04g02400D	-144	0	AT3G24120	21	+	0.974	0.955	tGAATAta	Loss of TFBS
bna103259	A04	1573014	T	A	BnaA04g02400D	-80	1	dof4.5	26	-	1	0.89	aatatgtCTTTTgc	Gain of TFBS
bna103260	A04	1573084	T	A	BnaA04g02400D	-10	1	AGL15	13	-	0.894	0.876	ttccaaattgTGAAA	Gain of TFBS
bna103260	A04	1573084	T	A	BnaA04g02400D	-10	1	AGL15	11	+	1	0.874	tTTTCCaaattgtgaaatc	Gain of TFBS
bna103260	A04	1573084	T	A	BnaA04g02400D	-10	1	AGL15	10	-	0.868	0.891	attttccaaattgTGAAAt	Gain of TFBS
bna103260	A04	1573084	T	A	BnaA04g02400D	-10	1	AGL16	12	+	1	0.87	TTTCCaaattgtgaa	Gain of TFBS
bna103260	A04	1573084	T	A	BnaA04g02400D	-10	1	AGL16	13	-	0.814	0.868	ttccaaattgTGAAA	Gain of TFBS
bna103260	A04	1573084	T	A	BnaA04g02400D	-10	1	SEP1	11	+	0.991	0.883	ttttCCAAAttgtgaaat	Gain of TFBS
bna103260	A04	1573084	T	A	BnaA04g02400D	-10	1	AGL1	11	+	0.997	0.876	tTTTCCaaattgtgaaat	Gain of TFBS
bna103292	A04	1584700	C	T	BnaA04g02420D	43	1	Dof2	22	-	0.961	0.961	tCCTTT	Gain of TFBS
bna103292	A04	1584700	C	T	BnaA04g02420D	43	1	Dof3	22	-	0.977	0.97	tCCTTT	Gain of TFBS
bna103292	A04	1584700	C	T	BnaA04g02420D	43	1	PBF	23	-	0.969	0.969	CCTTT	Gain of TFBS
bna103293	A04	1584891	T	G	BnaA04g02420D	-148	0	AGL15	26	+	0.941	0.865	TTTCTcttttggctt	Loss of TFBS
bna103293	A04	1584891	T	G	BnaA04g02420D	-148	0	AGL27	25	+	1	0.908	cTTTCTcttttggc	Loss of TFBS
bna103293	A04	1584891	T	G	BnaA04g02420D	-148	0	AT5G66940	15	+	1	0.881	agagcattcgctttctCTTTTggctttct	Loss of TFBS
bna103293	A04	1584891	T	G	BnaA04g02420D	-148	0	Dof2	23	-	1	0.999	cGCTTT	Loss of TFBS
bna103293	A04	1584891	T	G	BnaA04g02420D	-148	0	Dof3	23	-	1	1	cGCTTT	Loss of TFBS
bna103293	A04	1584891	T	G	BnaA04g02420D	-148	0	FLC	23	-	1	0.911	cgcTTTCTcttttggctttct	Loss of TFBS
bna103293	A04	1584891	T	G	BnaA04g02420D	-148	0	MNB1A	24	-	1	1	GCTTT	Loss of TFBS
bna103293	A04	1584891	T	G	BnaA04g02420D	-148	0	PBF	24	-	1	1	GCTTT	Loss of TFBS
bna103293	A04	1584891	T	G	BnaA04g02420D	-148	1	CMTA2	19	+	1	0.98	cattCGCGT	Gain of TFBS
bna103293	A04	1584891	T	G	BnaA04g02420D	-148	1	CMTA3	22	+	1	0.975	tCGCGTtct	Gain of TFBS
bna103293	A04	1584891	T	G	BnaA04g02420D	-148	1	CAMTA1	19	+	1	0.914	cattCGCGTtct	Gain of TFBS
bna103294	A04	1585175	A	C	BnaA04g02420D	-432	1	CMTA3	22	-	0.957	0.934	agaACACGa	Gain of TFBS
bna103296	A04	1585189	T	C	BnaA04g02420D	-446	0	CMTA3	21	+	0.928	0.93	cCGGGTcgg	Loss of TFBS
bna103296	A04	1585189	T	C	BnaA04g02420D	-446	0	DREB1A	23	+	1	0.927	ggGTCGGgtc	Loss of TFBS
bna103296	A04	1585189	T	C	BnaA04g02420D	-446	1	ERF069	23	+	0.988	0.977	gGGCCGggt	Gain of TFBS
bna103348	A04	1609796	G	T	BnaA04g02440D	-258	0	AT1G36060	20	+	1	0.938	tgagaCGGTGagag	Loss of TFBS
bna103348	A04	1609796	G	T	BnaA04g02440D	-258	0	AT1G77640	11	+	1	0.915	ggactcacgtgagaCGGTGag	Loss of TFBS
bna103348	A04	1609796	G	T	BnaA04g02440D	-258	0	AT4G16750	21	-	0.951	0.901	gaGACGGtgagagtt	Loss of TFBS
bna103348	A04	1609796	G	T	BnaA04g02440D	-258	0	DREB2	16	+	0.944	0.91	cacgtgaGACGGtgagagttt	Loss of TFBS
bna103348	A04	1609796	G	T	BnaA04g02440D	-258	0	DREB26	23	-	1	0.924	gaCGGTGagagtttattcag	Loss of TFBS
bna103348	A04	1609796	G	T	BnaA04g02440D	-258	0	ERF017	20	+	1	0.917	tgaGACGGtgagag	Loss of TFBS
bna103348	A04	1609796	G	T	BnaA04g02440D	-258	0	RAP21	21	+	1	0.913	gagaCGGTGagag	Loss of TFBS
bna103349	A04	1609848	A	C	BnaA04g02440D	-206	0	MYB1	15	-	1	0.864	gtagccacgaAACGGcacg	Loss of TFBS
bna103349	A04	1609848	A	C	BnaA04g02440D	-206	0	NAC029	18	+	0.948	0.893	gccACGAAacggc	Loss of TFBS
bna103349	A04	1609848	A	C	BnaA04g02440D	-206	1	F3A4.140	22	-	1	0.883	cgAACCGgcacgt	Gain of TFBS
bna103349	A04	1609848	A	C	BnaA04g02440D	-206	1	PHYPADRAFT_64121	20	-	0.911	0.911	cacgaACCGGcac	Gain of TFBS
bna103349	A04	1609848	A	C	BnaA04g02440D	-206	1	DREB2	17	-	0.941	0.874	agccacgaaCCGGCacgtagt	Gain of TFBS
bna103350	A04	1609861	C	G	BnaA04g02440D	-193	1	TGA7	24	-	1	0.91	ttgCGTCAtc	Gain of TFBS
bna103352	A04	1610090	G	C	BnaA04g02440D	36	0	AGL3	17	+	0.915	0.901	CCATTgatag	Loss of TFBS
bna103352	A04	1610090	G	C	BnaA04g02440D	36	0	AGL3	13	+	0.963	0.863	gactCCATTgatagctaa	Loss of TFBS
bna103352	A04	1610090	G	C	BnaA04g02440D	36	1	MYB55	25	+	1	0.898	ACCTAact	Gain of TFBS
bna103352	A04	1610090	G	C	BnaA04g02440D	36	1	MYB57	22	+	1	0.986	gataCCTAActtct	Gain of TFBS
bna103352	A04	1610090	G	C	BnaA04g02440D	36	1	MYB59	24	-	1	1	tACCTAac	Gain of TFBS
bna103352	A04	1610090	G	C	BnaA04g02440D	36	1	FaEOBII	23	-	1	1	ataCCTAAct	Gain of TFBS
bna103352	A04	1610090	G	C	BnaA04g02440D	36	1	MYB62	23	-	1	0.988	ataCCTAActtctag	Gain of TFBS
bna103352	A04	1610090	G	C	BnaA04g02440D	36	1	MYB24	25	-	1	1	aCCTAActt	Gain of TFBS
bna103352	A04	1610090	G	C	BnaA04g02440D	36	1	MYB27	22	-	1	0.943	gataCCTAActtcta	Gain of TFBS
bna103352	A04	1610090	G	C	BnaA04g02440D	36	1	MYB3	22	-	1	0.947	gatACCTAact	Gain of TFBS
bna103352	A04	1610090	G	C	BnaA04g02440D	36	1	MYB46	24	-	1	1	tACCTAac	Gain of TFBS
bna103352	A04	1610090	G	C	BnaA04g02440D	36	1	MYB111	24	-	1	0.971	tACCTAac	Gain of TFBS
bna10336	A01	6601880	A	T	BnaA01g13160D	-291	0	At2g38090	10	+	1	0.872	gataaacacGATAAaaaattt	Loss of TFBS
bna10336	A01	6601880	A	T	BnaA01g13160D	-291	0	At3g11280	14	-	1	0.921	aacacGATAAaaaa	Loss of TFBS
bna10336	A01	6601880	A	T	BnaA01g13160D	-291	0	OBP3	22	-	1	0.902	aaaaaatttagaAAAAGgaaa	Loss of TFBS
bna10336	A01	6601880	A	T	BnaA01g13160D	-291	1	At5g58900	15	+	1	0.9	acacGATAAaatatt	Gain of TFBS
bna10336	A01	6601880	A	T	BnaA01g13160D	-291	1	AT3G10580	13	+	1	0.902	aaacacGATAAaata	Gain of TFBS
bna10337	A01	6608639	G	A	BnaA01g13170D	-66	0	AIL7	16	+	0.947	0.89	cgtagcCCAAG	Loss of TFBS
bna10337	A01	6608639	G	A	BnaA01g13170D	-66	1	MNB1A	25	+	0.97	0.97	AAAGA	Gain of TFBS
bna10337	A01	6608639	G	A	BnaA01g13170D	-66	1	PBF	25	+	0.969	0.969	AAAGA	Gain of TFBS
bna10337	A01	6608639	G	A	BnaA01g13170D	-66	1	OBP1	23	-	1	0.923	cAAAAGaaaaccctaagcagg	Gain of TFBS
bna10337	A01	6608639	G	A	BnaA01g13170D	-66	1	Dof2	25	+	0.965	0.965	AAAGAa	Gain of TFBS
bna10337	A01	6608639	G	A	BnaA01g13170D	-66	1	Dof3	25	+	0.968	0.961	AAAGAa	Gain of TFBS
bna103373	A04	1626681	T	C	BnaA04g02460D	-172	1	MNB1A	25	-	0.97	0.97	ACTTT	Gain of TFBS
bna103373	A04	1626681	T	C	BnaA04g02460D	-172	1	Dof2	24	-	0.961	0.961	aACTTT	Gain of TFBS
bna103373	A04	1626681	T	C	BnaA04g02460D	-172	1	Dof3	24	-	0.994	0.971	aACTTT	Gain of TFBS
bna103373	A04	1626681	T	C	BnaA04g02460D	-172	1	PBF	25	-	0.985	0.985	ACTTT	Gain of TFBS
bna103374	A04	1626697	C	G	BnaA04g02460D	-188	1	NAC029	21	+	1	0.887	aaaACGCAaatct	Gain of TFBS
bna103377	A04	1626796	G	A	BnaA04g02460D	-287	1	AT3G46070	18	-	1	0.925	ttctAGTGAacaatt	Gain of TFBS
bna103379	A04	1626830	G	A	BnaA04g02460D	-321	0	ATHB-5	18	-	0.977	0.925	aATTATttg	Loss of TFBS
bna103379	A04	1626830	G	A	BnaA04g02460D	-321	1	ATHB20	16	-	1	0.983	ttaATTATtta	Gain of TFBS
bna103380	A04	1627066	A	G	BnaA04g02470D	-414	0	Dof2	25	+	0.965	0.965	AAAGAa	Loss of TFBS
bna103380	A04	1627066	A	G	BnaA04g02470D	-414	0	Dof3	25	+	0.968	0.961	AAAGAa	Loss of TFBS
bna103380	A04	1627066	A	G	BnaA04g02470D	-414	0	MNB1A	25	+	0.97	0.97	AAAGA	Loss of TFBS
bna103380	A04	1627066	A	G	BnaA04g02470D	-414	0	PBF	25	+	0.969	0.969	AAAGA	Loss of TFBS
bna103381	A04	1627124	T	C	BnaA04g02470D	-356	0	AT1G76880	22	+	1	0.948	ataGTAAAatattaat	Loss of TFBS
bna103381	A04	1627124	T	C	BnaA04g02470D	-356	0	GT-2	19	-	1	0.931	gaaataGTAAAata	Loss of TFBS
bna103397	A04	1631401	T	A	BnaA04g02480D	53	0	NAC029	16	+	1	0.887	aaaACGCAaatcc	Loss of TFBS
bna103397	A04	1631401	T	A	BnaA04g02480D	53	1	AT1G76870	19	+	1	0.946	acgcaAAACCaagc	Gain of TFBS
bna103399	A04	1631608	G	A	BnaA04g02480D	-154	0	F3A4.140	18	+	1	0.859	tataaaCGGTTtg	Loss of TFBS
bna103399	A04	1631608	G	A	BnaA04g02480D	-154	0	myb.Ph3	21	+	0.997	0.954	aAACGGttt	Loss of TFBS
bna103399	A04	1631608	G	A	BnaA04g02480D	-154	0	myb.Ph3	21	-	1	0.956	aaaCGGTTt	Loss of TFBS
bna103399	A04	1631608	G	A	BnaA04g02480D	-154	0	MYB1	12	-	1	0.917	gatttatataAACGGtttg	Loss of TFBS
bna103399	A04	1631608	G	A	BnaA04g02480D	-154	0	MYB1	20	+	0.972	0.891	taaaCGGTTtgtcgtttat	Loss of TFBS
bna103399	A04	1631608	G	A	BnaA04g02480D	-154	0	MYB52	21	-	1	0.945	aAACGGtttgt	Loss of TFBS
bna103399	A04	1631608	G	A	BnaA04g02480D	-154	0	MYB70	20	-	1	0.988	taaaCGGTTtg	Loss of TFBS
bna103399	A04	1631608	G	A	BnaA04g02480D	-154	0	MYB77	15	+	1	0.927	ttatataaaCGGTTt	Loss of TFBS
bna103399	A04	1631608	G	A	BnaA04g02480D	-154	0	MYB77	21	-	0.988	0.904	aAACGGtttgtcgtt	Loss of TFBS
bna103400	A04	1631812	G	T	BnaA04g02480D	-358	1	Adof1	22	-	1	0.923	tttttcttaCTTTTaaataat	Gain of TFBS
bna103401	A04	1631871	G	T	BnaA04g02480D	-417	0	ATHB-12	19	+	0.952	0.905	acTAATTg	Loss of TFBS
bna103448	A04	1638581	C	T	BnaA04g02490D	-489	1	UIF1	21	-	1	0.996	ccGAATCtta	Gain of TFBS
bna103448	A04	1638581	C	T	BnaA04g02490D	-489	1	MYR2	19	+	1	0.962	acccGAATCttaaa	Gain of TFBS
bna103448	A04	1638581	C	T	BnaA04g02490D	-489	1	ARR2	21	+	1	0.998	ccgaATCTTa	Gain of TFBS
bna103448	A04	1638581	C	T	BnaA04g02490D	-489	1	AT1G13300	22	-	1	0.942	cGAATCttaaaaacc	Gain of TFBS
bna103448	A04	1638581	C	T	BnaA04g02490D	-489	1	OsRR22	20	-	0.937	0.926	cccGAATCtt	Gain of TFBS
bna103448	A04	1638581	C	T	BnaA04g02490D	-489	1	ARR10	21	-	0.996	0.995	ccgAATCT	Gain of TFBS
bna103448	A04	1638581	C	T	BnaA04g02490D	-489	1	AT3G24120	22	+	1	0.99	cGAATCtt	Gain of TFBS
bna103448	A04	1638581	C	T	BnaA04g02490D	-489	1	ARR11	22	-	0.935	0.954	cgAATCTt	Gain of TFBS
bna103448	A04	1638581	C	T	BnaA04g02490D	-489	1	ARR14	21	-	0.988	0.988	ccGAATCt	Gain of TFBS
bna103448	A04	1638581	C	T	BnaA04g02490D	-489	1	HHO2	23	-	1	0.92	GAATCttaaaaac	Gain of TFBS
bna103448	A04	1638581	C	T	BnaA04g02490D	-489	1	HHO3	22	+	1	0.971	cGAATCttaaa	Gain of TFBS
bna103448	A04	1638581	C	T	BnaA04g02490D	-489	1	ARR18	20	-	0.934	0.939	cccgAATCTtaaa	Gain of TFBS
bna103448	A04	1638581	C	T	BnaA04g02490D	-489	1	HHO6	23	-	1	0.94	GAATCttaaaa	Gain of TFBS
bna103449	A04	1638668	C	T	BnaA04g02490D	-402	0	CMTA3	20	-	0.928	0.905	ccgACCCGa	Loss of TFBS
bna103449	A04	1638668	C	T	BnaA04g02490D	-402	1	CBF1	16	+	1	0.914	gtatCCGACctg	Gain of TFBS
bna103449	A04	1638668	C	T	BnaA04g02490D	-402	1	CBF4	16	-	1	0.915	gtatCCGACctga	Gain of TFBS
bna10345	A01	6630939	T	G	BnaA01g13190D	-493	0	ARR10	22	+	0.996	0.956	AGATTttt	Loss of TFBS
bna103504	A04	1752797	A	G	BnaA04g02610D	-31	0	MYB1	16	-	0.936	0.871	tgattttaaaAACTGtatt	Loss of TFBS
bna103504	A04	1752797	A	G	BnaA04g02610D	-31	0	MYB77	25	-	0.985	0.915	aAACTGtatttatta	Loss of TFBS
bna103504	A04	1752797	A	G	BnaA04g02610D	-31	1	MNB1A	23	+	0.97	0.97	AAAGA	Gain of TFBS
bna103504	A04	1752797	A	G	BnaA04g02610D	-31	1	PBF	23	+	0.969	0.969	AAAGA	Gain of TFBS
bna103504	A04	1752797	A	G	BnaA04g02610D	-31	1	Dof2	23	+	0.965	0.964	AAAGAc	Gain of TFBS
bna103504	A04	1752797	A	G	BnaA04g02610D	-31	1	Dof3	23	+	0.968	0.961	AAAGAc	Gain of TFBS
bna103505	A04	1752902	T	C	BnaA04g02610D	-136	0	WRKY12	24	+	1	0.913	agTTGACt	Loss of TFBS
bna103505	A04	1752902	T	C	BnaA04g02610D	-136	0	WRKY14	22	-	1	0.9	taagTTGACtcaa	Loss of TFBS
bna103505	A04	1752902	T	C	BnaA04g02610D	-136	0	WRKY15	23	-	1	0.992	aagTTGACtc	Loss of TFBS
bna103505	A04	1752902	T	C	BnaA04g02610D	-136	0	WRKY18	24	-	1	0.979	agTTGACtca	Loss of TFBS
bna103505	A04	1752902	T	C	BnaA04g02610D	-136	0	WRKY2	25	-	1	0.95	gTTGACtc	Loss of TFBS
bna103505	A04	1752902	T	C	BnaA04g02610D	-136	0	WRKY20	22	+	1	0.951	taagTTGACtcaa	Loss of TFBS
bna103505	A04	1752902	T	C	BnaA04g02610D	-136	0	WRKY21	24	-	1	0.996	agTTGACtca	Loss of TFBS
bna103505	A04	1752902	T	C	BnaA04g02610D	-136	0	WRKY23	24	-	1	0.951	agTTGACt	Loss of TFBS
bna103505	A04	1752902	T	C	BnaA04g02610D	-136	0	WRKY24	23	+	1	0.895	aagTTGACtcaatg	Loss of TFBS
bna103505	A04	1752902	T	C	BnaA04g02610D	-136	0	WRKY25	25	-	1	0.935	gTTGACtc	Loss of TFBS
bna103505	A04	1752902	T	C	BnaA04g02610D	-136	0	WRKY26	22	-	1	0.892	taagTTGACtcaa	Loss of TFBS
bna103505	A04	1752902	T	C	BnaA04g02610D	-136	0	WRKY28	22	+	1	0.927	taagTTGACtcaa	Loss of TFBS
bna103505	A04	1752902	T	C	BnaA04g02610D	-136	0	WRKY28	23	-	1	0.989	aagTTGACtca	Loss of TFBS
bna103505	A04	1752902	T	C	BnaA04g02610D	-136	0	WRKY29	24	-	1	0.92	agTTGACtcaa	Loss of TFBS
bna103505	A04	1752902	T	C	BnaA04g02610D	-136	0	WRKY3	24	-	1	0.923	agTTGACtcaa	Loss of TFBS
bna103505	A04	1752902	T	C	BnaA04g02610D	-136	0	WRKY30	22	-	1	0.99	taagTTGACt	Loss of TFBS
bna103505	A04	1752902	T	C	BnaA04g02610D	-136	0	WRKY31	24	-	1	0.957	agTTGACtcaatgtctctg	Loss of TFBS
bna103505	A04	1752902	T	C	BnaA04g02610D	-136	0	WRKY33	24	-	1	0.935	agTTGACtcaa	Loss of TFBS
bna103505	A04	1752902	T	C	BnaA04g02610D	-136	0	WRKY38	24	+	1	0.93	agTTGACt	Loss of TFBS
bna103505	A04	1752902	T	C	BnaA04g02610D	-136	0	WRKY42	14	+	1	0.969	taaagaattaagTTGACtcaa	Loss of TFBS
bna103505	A04	1752902	T	C	BnaA04g02610D	-136	0	WRKY43	23	-	1	0.995	aagTTGACtc	Loss of TFBS
bna103505	A04	1752902	T	C	BnaA04g02610D	-136	0	WRKY45	24	+	1	0.907	agTTGACt	Loss of TFBS
bna103505	A04	1752902	T	C	BnaA04g02610D	-136	0	WRKY55	22	+	1	0.945	taagTTGACtca	Loss of TFBS
bna103505	A04	1752902	T	C	BnaA04g02610D	-136	0	WRKY57	24	-	1	0.992	agTTGACtca	Loss of TFBS
bna103505	A04	1752902	T	C	BnaA04g02610D	-136	0	WRKY59	24	-	1	0.937	agTTGACtcaat	Loss of TFBS
bna103505	A04	1752902	T	C	BnaA04g02610D	-136	0	WRKY6	24	+	1	0.951	agTTGACtcaatgtctctg	Loss of TFBS
bna103505	A04	1752902	T	C	BnaA04g02610D	-136	0	WRKY60	23	-	1	0.92	aagTTGACtca	Loss of TFBS
bna103505	A04	1752902	T	C	BnaA04g02610D	-136	0	WRKY62	25	-	1	0.908	gTTGACtc	Loss of TFBS
bna103505	A04	1752902	T	C	BnaA04g02610D	-136	0	WRKY65	24	-	1	0.917	agTTGACtcaa	Loss of TFBS
bna103505	A04	1752902	T	C	BnaA04g02610D	-136	0	WRKY70	22	+	1	0.869	taagTTGACtcaa	Loss of TFBS
bna103505	A04	1752902	T	C	BnaA04g02610D	-136	0	WRKY75	25	-	1	0.999	gTTGACtc	Loss of TFBS
bna103505	A04	1752902	T	C	BnaA04g02610D	-136	0	WRKY8	24	-	1	0.997	agTTGACtc	Loss of TFBS
bna103505	A04	1752902	T	C	BnaA04g02610D	-136	1	bZIP52	19	-	0.935	0.879	aattaagCTGACtc	Gain of TFBS
bna103506	A04	1752960	T	G	BnaA04g02610D	-194	0	ATHB-16	23	+	0.96	0.973	tAATTAtt	Loss of TFBS
bna103506	A04	1752960	T	G	BnaA04g02610D	-194	0	ATHB-16	24	-	1	1	aaTTATTa	Loss of TFBS
bna103506	A04	1752960	T	G	BnaA04g02610D	-194	0	ATHB-5	22	+	1	0.934	ataATTATt	Loss of TFBS
bna103506	A04	1752960	T	G	BnaA04g02610D	-194	0	ATHB13	22	-	1	0.991	ataaTTATTaa	Loss of TFBS
bna103506	A04	1752960	T	G	BnaA04g02610D	-194	0	ATHB18	22	+	0.991	0.969	ataATTATtaa	Loss of TFBS
bna103506	A04	1752960	T	G	BnaA04g02610D	-194	0	ATHB18	22	-	0.966	0.954	ataATTATtaa	Loss of TFBS
bna103506	A04	1752960	T	G	BnaA04g02610D	-194	0	ATHB34	14	+	1	0.95	tttcttctaTAATTa	Loss of TFBS
bna103506	A04	1752960	T	G	BnaA04g02610D	-194	0	ATHB34	23	-	1	0.966	tAATTAttaattaaa	Loss of TFBS
bna103506	A04	1752960	T	G	BnaA04g02610D	-194	0	ATHB4	22	-	0.98	0.952	ataATTATta	Loss of TFBS
bna103506	A04	1752960	T	G	BnaA04g02610D	-194	0	ATHB4	23	+	0.985	0.955	taATTATtaa	Loss of TFBS
bna103506	A04	1752960	T	G	BnaA04g02610D	-194	0	ATHB40	15	-	1	0.88	ttcttctataaTTATTaatta	Loss of TFBS
bna103506	A04	1752960	T	G	BnaA04g02610D	-194	0	ATHB53	22	-	1	0.949	ataaTTATTaa	Loss of TFBS
bna103506	A04	1752960	T	G	BnaA04g02610D	-194	0	HAT5	23	+	1	0.993	taATTATt	Loss of TFBS
bna103506	A04	1752960	T	G	BnaA04g02610D	-194	0	ZHD1	26	+	1	0.998	ttatTAATTaaattt	Loss of TFBS
bna103506	A04	1752960	T	G	BnaA04g02610D	-194	0	ZHD5	23	+	1	0.95	taattATTAAt	Loss of TFBS
bna103506	A04	1752960	T	G	BnaA04g02610D	-194	1	HDG1	26	-	1	0.932	gtATTAAttaa	Gain of TFBS
bna103507	A04	1753252	A	C	BnaA04g02610D	-486	0	AT2G20110	23	-	1	0.917	tatatatatTTAAAa	Loss of TFBS
bna103533	A04	1797081	G	C	BnaA04g02680D	29	0	F3A4.140	22	+	1	0.906	tcttggCAGTTtc	Loss of TFBS
bna103556	A04	1836694	T	C	BnaA04g02740D	-119	0	id1	18	+	0.966	0.944	tttttttTTCCG	Loss of TFBS
bna103557	A04	1836792	G	A	BnaA04g02740D	-217	1	At5g08520	25	+	1	0.884	gaagaaGATAAct	Gain of TFBS
bna103616	A04	1854276	C	T	BnaA04g02770D	-332	0	CMTA3	20	-	0.928	0.93	gtcACCCGg	Loss of TFBS
bna103616	A04	1854276	C	T	BnaA04g02770D	-332	1	PIF3	21	-	0.893	0.911	tcACCTGggg	Gain of TFBS
bna103616	A04	1854276	C	T	BnaA04g02770D	-332	1	PIF5	21	+	0.914	0.937	tCACCTgg	Gain of TFBS
bna103617	A04	1854427	A	G	BnaA04g02770D	-483	0	Dof2	25	+	0.961	0.961	AAAGGa	Loss of TFBS
bna103617	A04	1854427	A	G	BnaA04g02770D	-483	0	Dof3	25	+	0.977	0.97	AAAGGa	Loss of TFBS
bna103617	A04	1854427	A	G	BnaA04g02770D	-483	0	PBF	25	+	0.969	0.969	AAAGG	Loss of TFBS
bna103643	A04	1866299	A	T	BnaA04g02780D	55	0	Dof2	24	+	0.965	0.963	AAAGAg	Loss of TFBS
bna103643	A04	1866299	A	T	BnaA04g02780D	55	0	Dof3	24	+	0.968	0.969	AAAGAg	Loss of TFBS
bna103643	A04	1866299	A	T	BnaA04g02780D	55	0	MNB1A	24	+	0.97	0.97	AAAGA	Loss of TFBS
bna103643	A04	1866299	A	T	BnaA04g02780D	55	0	PBF	24	+	0.969	0.969	AAAGA	Loss of TFBS
bna103644	A04	1866441	T	C	BnaA04g02780D	-87	1	CMTA3	25	+	0.936	0.913	tCGAGTtgc	Gain of TFBS
bna103645	A04	1866505	C	T	BnaA04g02780D	-151	1	RAMOSA1	22	-	1	0.902	tgaCTCTCtctctc	Gain of TFBS
bna103646	A04	1866635	G	A	BnaA04g02780D	-281	0	F3A4.140	20	-	1	0.905	atAACTGtgatta	Loss of TFBS
bna103646	A04	1866635	G	A	BnaA04g02780D	-281	0	MYB1	12	-	0.936	0.908	ttttaataatAACTGtgat	Loss of TFBS
bna103646	A04	1866635	G	A	BnaA04g02780D	-281	0	MYB33	20	+	0.994	0.934	aTAACTgtgat	Loss of TFBS
bna103646	A04	1866635	G	A	BnaA04g02780D	-281	0	MYB65	17	+	0.975	0.946	ataatAACTGtga	Loss of TFBS
bna103646	A04	1866635	G	A	BnaA04g02780D	-281	0	MYB73	21	+	0.994	0.962	tAACTGtgatt	Loss of TFBS
bna103646	A04	1866635	G	A	BnaA04g02780D	-281	0	MYB77	21	-	0.985	0.965	tAACTGtgattagtg	Loss of TFBS
bna103646	A04	1866635	G	A	BnaA04g02780D	-281	1	GT-4	19	+	0.765	0.872	aataactATGATta	Gain of TFBS
bna103646	A04	1866635	G	A	BnaA04g02780D	-281	1	HAT22	25	-	1	0.971	taTGATTagt	Gain of TFBS
bna103646	A04	1866635	G	A	BnaA04g02780D	-281	1	ATHB-12	25	+	1	0.905	taTGATTa	Gain of TFBS
bna103646	A04	1866635	G	A	BnaA04g02780D	-281	1	HAT1	24	-	1	0.983	ctaTGATTag	Gain of TFBS
bna103646	A04	1866635	G	A	BnaA04g02780D	-281	1	HAT2	24	-	1	0.97	ctaTGATTagt	Gain of TFBS
bna103665	A04	1875306	A	G	BnaA04g02800D	-277	0	ZHD5	18	-	1	0.951	tTTAATcaatt	Loss of TFBS
bna103665	A04	1875306	A	G	BnaA04g02800D	-277	1	AT3G10030	20	-	1	0.928	taatcaGTTAAga	Gain of TFBS
bna103665	A04	1875306	A	G	BnaA04g02800D	-277	1	MYB56	20	-	0.957	0.915	taatcAGTTAagacc	Gain of TFBS
bna103665	A04	1875306	A	G	BnaA04g02800D	-277	1	MYB113	20	+	0.978	0.966	taatcaGTTAA	Gain of TFBS
bna103665	A04	1875306	A	G	BnaA04g02800D	-277	1	MYB65	21	-	0.975	0.94	aatCAGTTaagac	Gain of TFBS
bna103665	A04	1875306	A	G	BnaA04g02800D	-277	1	MYB70	16	-	0.994	0.969	ggtttaatCAGTTa	Gain of TFBS
bna103665	A04	1875306	A	G	BnaA04g02800D	-277	1	MYB73	19	-	0.994	0.957	ttaatCAGTTa	Gain of TFBS
bna103665	A04	1875306	A	G	BnaA04g02800D	-277	1	MYB77	15	+	0.985	0.948	gggtttaatCAGTTa	Gain of TFBS
bna103665	A04	1875306	A	G	BnaA04g02800D	-277	1	MYB33	20	-	0.994	0.975	taatcAGTTAa	Gain of TFBS
bna103665	A04	1875306	A	G	BnaA04g02800D	-277	1	MYB81	20	-	0.998	0.986	taatCAGTTaa	Gain of TFBS
bna103665	A04	1875306	A	G	BnaA04g02800D	-277	1	MYB1	20	+	0.936	0.868	taatCAGTTaagaccgtag	Gain of TFBS
bna103672	A04	1882226	C	T	BnaA04g02820D	-278	1	MYB56	12	+	0.944	0.857	attttTAACCaaaat	Gain of TFBS
bna103672	A04	1882226	C	T	BnaA04g02830D	-247	1	MYB56	12	+	0.944	0.857	attttTAACCaaaat	Gain of TFBS
bna103736	A04	1990586	A	T	BnaA04g03030D	-448	0	ATHB-5	18	-	0.987	0.923	aATCATtta	Loss of TFBS
bna103797	A04	2003062	T	A	BnaA04g03040D	-119	0	WRKY62	26	-	1	0.895	tTTGACaa	Loss of TFBS
bna103797	A04	2003062	T	A	BnaA04g03040D	-119	0	WRKY75	26	-	1	0.936	tTTGACaa	Loss of TFBS
bna103797	A04	2003062	T	A	BnaA04g03040D	-119	0	WRKY8	25	-	1	0.98	ttTTGACaa	Loss of TFBS
bna103797	A04	2003062	T	A	BnaA04g03040D	-119	1	ZHD3	20	-	1	0.913	gttATTATtgacaa	Gain of TFBS
bna103797	A04	2003062	T	A	BnaA04g03040D	-119	1	ATHB-51	22	+	1	0.948	tATTATtg	Gain of TFBS
bna103797	A04	2003062	T	A	BnaA04g03040D	-119	1	ATHB-12	22	+	0.958	0.943	taTTATTg	Gain of TFBS
bna103797	A04	2003062	T	A	BnaA04g03040D	-119	1	ATHB40	13	-	1	0.875	aaaaatagttaTTATTgacaa	Gain of TFBS
bna103798	A04	2003157	T	G	BnaA04g03040D	-24	0	AT1G69570	9	+	1	0.876	tttcttCTTTTgttttttaatcacaga	Loss of TFBS
bna103798	A04	2003157	T	G	BnaA04g03040D	-24	0	ATHB34	17	+	0.971	0.961	tttgtttttTAATCa	Loss of TFBS
bna103798	A04	2003157	T	G	BnaA04g03040D	-24	0	ZHD5	24	-	1	0.983	tTTAATcacag	Loss of TFBS
bna103825	A04	2010141	G	A	BnaA04g03050D	-449	0	AT3G24120	25	+	0.974	0.971	gGAATAtt	Loss of TFBS
bna103825	A04	2010141	G	A	BnaA04g03050D	-449	0	HHO3	25	+	0.971	0.969	gGAATAttatt	Loss of TFBS
bna103825	A04	2010141	G	A	BnaA04g03050D	-449	0	KAN2	23	-	1	0.929	tggGAATAttattat	Loss of TFBS
bna103825	A04	2010141	G	A	BnaA04g03050D	-449	0	MYR2	22	+	0.996	0.978	ttggGAATAttatt	Loss of TFBS
bna103825	A04	2010141	G	A	BnaA04g03050D	-449	0	PHL1	22	-	1	0.878	ttgggAATATtatta	Loss of TFBS
bna103825	A04	2010141	G	A	BnaA04g03050D	-449	0	PHL11	22	+	1	0.956	ttggGAATAttatt	Loss of TFBS
bna103825	A04	2010141	G	A	BnaA04g03050D	-449	0	PHL12	21	+	1	0.864	attgggaATATTat	Loss of TFBS
bna103826	A04	2010177	A	G	BnaA04g03050D	-413	0	AT2G28810	9	-	1	0.907	atAAAAGaacaaaaaaaaaac	Loss of TFBS
bna103826	A04	2010177	A	G	BnaA04g03050D	-413	0	AT5G02460	9	+	1	0.904	atAAAAGaacaaaaaaaaaac	Loss of TFBS
bna103826	A04	2010177	A	G	BnaA04g03050D	-413	1	dof4.2	16	+	1	0.897	aacaaaAAAAGaacagatt	Gain of TFBS
bna103826	A04	2010177	A	G	BnaA04g03050D	-413	1	dof4.5	20	+	1	0.876	aaAAAAGaacagat	Gain of TFBS
bna103826	A04	2010177	A	G	BnaA04g03050D	-413	1	AT3G45610	12	-	1	0.957	aaagaacaaaAAAAGaaca	Gain of TFBS
bna103826	A04	2010177	A	G	BnaA04g03050D	-413	1	Adof1	15	+	1	0.932	gaacaaaAAAAGaacagatta	Gain of TFBS
bna103826	A04	2010177	A	G	BnaA04g03050D	-413	1	squamosa	17	+	0.89	0.898	acaaaAAAAGaaca	Gain of TFBS
bna103826	A04	2010177	A	G	BnaA04g03050D	-413	1	Dof2	23	+	0.965	0.965	AAAGAa	Gain of TFBS
bna103826	A04	2010177	A	G	BnaA04g03050D	-413	1	Dof3	23	+	0.968	0.961	AAAGAa	Gain of TFBS
bna103826	A04	2010177	A	G	BnaA04g03050D	-413	1	COG1	12	+	1	0.926	aaagaacaaaAAAAGaacaga	Gain of TFBS
bna103826	A04	2010177	A	G	BnaA04g03050D	-413	1	MNB1A	23	+	0.97	0.97	AAAGA	Gain of TFBS
bna103826	A04	2010177	A	G	BnaA04g03050D	-413	1	AP1	17	+	1	0.896	acAAAAAaagaac	Gain of TFBS
bna103826	A04	2010177	A	G	BnaA04g03050D	-413	1	AT1G69570	6	-	1	0.893	aaaataaaagaacaaaAAAAGaacaga	Gain of TFBS
bna103826	A04	2010177	A	G	BnaA04g03050D	-413	1	SEP3	17	-	1	0.898	aCAAAAaaaga	Gain of TFBS
bna103826	A04	2010177	A	G	BnaA04g03050D	-413	1	OBP3	10	-	1	0.89	taaaagaacaaaAAAAGaaca	Gain of TFBS
bna103826	A04	2010177	A	G	BnaA04g03050D	-413	1	PBF	23	+	0.969	0.969	AAAGA	Gain of TFBS
bna103830	A04	2010325	C	T	BnaA04g03050D	-265	0	AT1G76870	17	+	1	0.973	cataaAAACCacta	Loss of TFBS
bna103830	A04	2010325	C	T	BnaA04g03050D	-265	1	ATHB40	9	+	0.946	0.874	caaccAATCAtaaaaactact	Gain of TFBS
bna103832	A04	2010555	C	G	BnaA04g03050D	-35	0	ERF069	23	-	0.989	0.977	cttCGGCTc	Loss of TFBS
bna103876	A04	2049724	A	T	BnaA04g03100D	-443	0	HMG-I/Y	13	+	1	0.932	caaaaaaaaaAAAAAa	Loss of TFBS
bna103876	A04	2049724	A	T	BnaA04g03100D	-443	0	HMG-I/Y	14	+	1	0.93	aaaaaaaaaaAAAAAa	Loss of TFBS
bna103876	A04	2049724	A	T	BnaA04g03100D	-443	0	HMG-I/Y	15	+	1	0.93	aaaaaaaaaaAAAAAa	Loss of TFBS
bna103876	A04	2049724	A	T	BnaA04g03100D	-443	0	HMG-I/Y	16	+	1	0.961	aaaaaaaaaaAAAAAc	Loss of TFBS
bna103876	A04	2049724	A	T	BnaA04g03100D	-443	0	HMG-I/Y	21	+	0.943	0.937	aaaaaaaaaaCAAAAc	Loss of TFBS
bna103912	A04	2102971	T	A	BnaA04g03220D	-382	1	CMTA3	23	-	0.928	0.912	aaaACCCGc	Gain of TFBS
bna103912	A04	2102971	T	A	BnaA04g03220D	-382	1	AT1G76870	19	+	1	0.937	ttttaAAACCcgct	Gain of TFBS
bna103939	A04	2123280	G	A	BnaA04g03250D	-268	1	Dof2	25	+	1	1	AAAGCc	Gain of TFBS
bna103939	A04	2123280	G	A	BnaA04g03250D	-268	1	Dof3	25	+	1	0.993	AAAGCc	Gain of TFBS
bna103939	A04	2123280	G	A	BnaA04g03250D	-268	1	PBF	25	+	1	1	AAAGC	Gain of TFBS
bna103939	A04	2123280	G	A	BnaA04g03250D	-268	1	MNB1A	25	+	1	1	AAAGC	Gain of TFBS
bna103961	A04	2144578	A	T	BnaA04g03290D	-37	0	MYB113	17	+	0.978	0.916	tattacGTTAA	Loss of TFBS
bna103961	A04	2144578	A	T	BnaA04g03290D	-37	0	MYB56	17	-	1	0.876	tattaCGTTAataac	Loss of TFBS
bna103961	A04	2144578	A	T	BnaA04g03290D	-37	0	NAC043	18	-	1	0.994	atTACGTtaa	Loss of TFBS
bna103961	A04	2144578	A	T	BnaA04g03290D	-37	0	ZHD5	23	-	1	0.969	gTTAATaacat	Loss of TFBS
bna104	A01	74372	T	A	BnaA01g00210D	-366	0	MYB113	25	-	0.978	0.944	TTAACaaagtc	Loss of TFBS
bna104	A01	74372	T	A	BnaA01g00210D	-366	0	MYB56	18	-	0.957	0.876	ataatAGTTAacaaa	Loss of TFBS
bna104041	A04	2295811	A	G	BnaA04g03400D	45	1	Dof2	23	+	0.965	0.964	AAAGAt	Gain of TFBS
bna104041	A04	2295811	A	G	BnaA04g03400D	45	1	PBF	23	+	0.969	0.969	AAAGA	Gain of TFBS
bna104041	A04	2295811	A	G	BnaA04g03400D	45	1	MNB1A	23	+	0.97	0.97	AAAGA	Gain of TFBS
bna104043	A04	2295960	C	T	BnaA04g03400D	-104	1	Dof2	21	-	1	0.999	cGCTTT	Gain of TFBS
bna104043	A04	2295960	C	T	BnaA04g03400D	-104	1	Dof3	21	-	1	1	cGCTTT	Gain of TFBS
bna104043	A04	2295960	C	T	BnaA04g03400D	-104	1	MNB1A	22	-	1	1	GCTTT	Gain of TFBS
bna104043	A04	2295960	C	T	BnaA04g03400D	-104	1	PBF	22	-	1	1	GCTTT	Gain of TFBS
bna104069	A04	2425002	G	T	BnaA04g03540D	-310	0	MYB3	20	+	1	0.903	tgcTAGGTtat	Loss of TFBS
[truncated: 218,739+ more rows]
