# Supplementary material for: In Silico Identification of the Complex Interplay between Regulatory SNPs, Transcription Factors, and Their Related Genes in Brassica napus L. Using Multi-Omics Data
Source: MDPI journal article supplement (doi:10.3390/ijms22020789), 2021-01-14
Supplement: s1 [file s1 › Suppl_Material/Suppl_TableS5_important_rSNPs.xlsx]

## Sheet: important_rSNPs
generic_snp_id	chr	snp_position	ref	alt
bna101594	A04	867275	T	C
bna101595	A04	867281	G	C
bna10523	A01	6762152	G	A
bna10526	A01	6762565	T	C
bna10595	A01	6773615	A	T
bna10596	A01	6773628	A	G
bna10992	A01	7055986	A	T
bna113114	A04	9025121	A	T
bna116677	A04	10682265	G	A
bna11758	A01	8045256	T	G
bna124301	A04	14258416	A	G
bna128445	A04	16365005	A	T
bna128460	A04	16367564	A	G
bna128551	A04	16469387	G	A
bna128556	A04	16470271	G	A
bna133861	A04	19042835	C	T
bna133877	A04	19060503	A	G
bna133878	A04	19060566	T	C
bna133898	A04	19086290	T	A
bna133905	A04	19086725	C	A
bna134870	A05	1386873	T	C
bna134975	A05	1484908	A	C
bna134998	A05	1527226	C	T
bna136210	A05	2400076	T	C
bna136212	A05	2400105	T	G
bna139381	A05	4022816	T	A
bna139611	A05	4184252	T	A
bna139974	A05	4240085	G	A
bna140589	A05	4378406	G	A
bna14132	A01	9526944	A	T
bna141761	A05	4812845	A	C
bna141825	A05	4836328	A	C
bna143220	A05	6351547	T	C
bna153988	A05	17813017	A	C
bna154175	A05	17957939	G	A
bna156576	A05	20188479	G	C
bna156888	A05	20453980	T	G
bna156902	A05	20480358	C	G
bna156949	A05	20503370	T	C
bna157094	A05	20560485	T	A
bna157095	A05	20560496	T	A
bna157096	A05	20560677	C	G
bna157097	A05	20561108	T	C
bna157099	A05	20566323	G	A
bna157103	A05	20577740	C	T
bna157164	A05	20680334	T	A
bna157200	A05	20791066	G	A
bna157227	A05	20797802	C	T
bna157228	A05	20797814	C	T
bna157443	A05	20948986	T	G
bna157444	A05	20949031	G	T
bna157445	A05	20949099	C	T
bna157446	A05	20949124	C	T
bna157447	A05	20949151	A	G
bna157805	A05	21459284	A	G
bna157972	A05	21521166	A	G
bna158268	A05	21627956	A	G
bna158289	A05	21631282	A	T
bna158291	A05	21631570	G	A
bna158306	A05	21638825	T	C
bna158423	A05	21727909	T	G
bna158425	A05	21728038	A	G
bna158540	A05	21767876	C	T
bna158541	A05	21767919	A	G
bna159343	A05	22139147	A	T
bna159670	A05	22551310	G	T
bna159697	A05	22589829	A	G
bna159698	A05	22589867	T	A
bna160427	A06	252965	A	G
bna160428	A06	252994	A	T
bna160429	A06	253031	C	G
bna161704	A06	1287169	C	T
bna164207	A06	3460035	A	T
bna164415	A06	3536985	C	T
bna166963	A06	5455345	C	A
bna169183	A06	6410954	A	T
bna172312	A06	8737254	A	T
bna172419	A06	8847654	C	A
bna173161	A06	9522335	A	G
bna173162	A06	9522361	G	A
bna173163	A06	9522376	G	T
bna173374	A06	9692312	A	G
bna173730	A06	10233046	T	A
bna173976	A06	10570114	C	G
bna173977	A06	10570370	C	A
bna173978	A06	10570506	A	T
bna173979	A06	10570643	G	A
bna177139	A06	16074002	T	G
bna177223	A06	16146556	T	G
bna177225	A06	16146709	T	C
bna177228	A06	16148153	T	G
bna177239	A06	16162019	G	T
bna177240	A06	16162220	G	A
bna177264	A06	16216226	A	C
bna177265	A06	16216287	A	C
bna177302	A06	16230331	A	G
bna178292	A06	17023738	C	G
bna179806	A06	18010395	A	G
bna181698	A06	19561265	C	A
bna181699	A06	19561345	A	G
bna181700	A06	19561432	G	A
bna181761	A06	19617287	G	A
bna181766	A06	19628594	T	C
bna181768	A06	19628953	A	G
bna181797	A06	19652852	A	G
bna181798	A06	19652859	A	G
bna181805	A06	19658047	A	G
bna181833	A06	19671930	T	C
bna181864	A06	19689607	A	G
bna181897	A06	19731139	G	C
bna182957	A06	20365951	T	G
bna183169	A06	20460719	A	T
bna183218	A06	20495379	A	G
bna184375	A06	21590373	G	C
bna184923	A06	22085688	G	A
bna185402	A06	22198161	C	T
bna185403	A06	22198291	C	T
bna185622	A06	22436289	G	T
bna185641	A06	22460604	T	G
bna185642	A06	22460697	G	A
bna185643	A06	22460727	C	A
bna1864	A01	938157	G	T
bna1865	A01	938301	G	A
bna1880	A01	961647	T	C
bna189471	A06	24191521	C	G
bna1960	A01	999838	C	T
bna203201	A07	7664424	G	C
bna205685	A07	9256479	G	C
bna205686	A07	9256559	C	G
bna206728	A07	9776077	C	T
bna206730	A07	9776173	A	G
bna206732	A07	9776224	G	T
bna206806	A07	9809961	C	T
bna206808	A07	9810375	G	A
bna206943	A07	9835651	G	A
bna211599	A07	11712317	G	T
bna213554	A07	12265492	T	C
bna213555	A07	12265539	A	C
bna213556	A07	12265583	T	A
bna213557	A07	12265608	T	C
bna213558	A07	12265630	T	C
bna213561	A07	12265706	T	C
bna213562	A07	12265723	T	A
bna213844	A07	12589751	G	A
bna213873	A07	12606767	A	C
bna213874	A07	12606784	T	A
bna213917	A07	12617132	A	C
bna213918	A07	12617216	T	G
bna213919	A07	12617264	A	G
bna213920	A07	12617607	A	G
bna216536	A07	14402508	T	C
bna216537	A07	14402577	T	G
bna216538	A07	14402637	G	C
bna217367	A07	14723509	C	A
bna221746	A07	16989953	G	A
bna221747	A07	16990161	C	T
bna221782	A07	17074000	A	G
bna221783	A07	17074020	G	C
bna222039	A07	17324916	A	C
bna222603	A07	17817178	T	C
bna222698	A07	17954896	A	G
bna226570	A07	21048632	G	C
bna226600	A07	21056816	T	C
bna227403	A07	21862507	C	T
bna227850	A07	22471208	G	A
bna227853	A07	22471804	T	A
bna227881	A07	22475500	G	A
bna227882	A07	22475557	T	G
bna228490	A07	22936775	C	T
bna228491	A07	22937027	C	G
bna228567	A07	23007806	G	A
bna228741	A07	23162218	G	C
bna228774	A07	23172179	A	T
bna228776	A07	23172536	C	T
bna22908	A01	14959472	A	G
bna229099	A07	23467509	T	C
bna229719	A08	545983	A	G
bna230388	A08	890896	C	T
bna230389	A08	891037	C	G
bna230390	A08	891061	T	A
bna230392	A08	891122	T	A
bna230576	A08	961796	G	A
bna230577	A08	961997	G	A
bna230818	A08	1082671	T	C
bna230881	A08	1314026	A	G
bna230888	A08	1330902	T	C
bna230889	A08	1330926	C	T
bna230890	A08	1330961	A	C
bna230892	A08	1331092	T	A
bna230920	A08	1356757	T	C
bna230921	A08	1356771	A	C
bna231194	A08	1872489	C	A
bna231275	A08	1961079	C	T
bna231298	A08	1985295	G	A
bna231338	A08	2022527	A	G
bna231342	A08	2023502	T	A
bna231651	A08	2342402	C	T
bna231652	A08	2342623	A	G
bna232869	A08	2608941	T	C
bna233006	A08	2699425	C	T
bna233031	A08	2709682	G	C
bna233238	A08	2957951	G	T
bna233260	A08	2994815	G	A
bna233602	A08	3221027	C	A
bna233603	A08	3221064	C	T
bna233604	A08	3221072	C	A
bna233605	A08	3221082	C	T
bna233606	A08	3221104	C	G
bna233660	A08	3276560	T	C
bna233661	A08	3276711	C	T
bna233662	A08	3276740	T	G
bna233663	A08	3276804	C	A
bna233724	A08	3321979	C	T
bna233749	A08	3344636	A	G
bna233750	A08	3344657	G	A
bna233751	A08	3344723	T	C
bna233817	A08	3532258	A	T
bna233843	A08	3607270	C	G
bna234023	A08	4355369	C	A
bna234840	A08	5307043	C	A
bna234852	A08	5333697	G	A
bna235198	A08	5634860	C	T
bna235442	A08	6124985	C	T
bna235443	A08	6125377	T	A
bna235464	A08	6150423	C	T
bna235575	A08	6288622	A	T
bna235583	A08	6311335	G	A
bna235684	A08	6408176	C	T
bna235685	A08	6408471	A	G
bna235698	A08	6465904	A	G
bna236507	A08	7012167	G	T
bna236508	A08	7012255	T	A
bna236589	A08	7070552	C	T
bna236691	A08	7095199	C	T
bna236733	A08	7109122	T	C
bna236734	A08	7109398	G	C
bna236783	A08	7156394	G	A
bna236785	A08	7157793	A	G
bna236858	A08	7215302	C	G
bna236859	A08	7215361	C	T
bna236874	A08	7231645	C	T
bna236987	A08	7341477	C	T
bna237038	A08	7410494	C	A
bna237532	A08	7737844	G	T
bna237693	A08	8163591	G	A
bna237694	A08	8163706	T	A
bna237698	A08	8166010	A	T
bna237802	A08	8195317	C	T
bna237809	A08	8195682	A	G
bna237812	A08	8195897	C	T
bna237828	A08	8199848	T	C
bna237829	A08	8199912	G	A
bna237967	A08	8346698	C	A
bna237977	A08	8350431	T	G
bna237981	A08	8365657	C	T
bna237989	A08	8401439	G	T
bna238019	A08	8478981	G	A
bna238037	A08	8490654	C	G
bna238048	A08	8500495	C	T
bna238090	A08	8549038	A	G
bna238133	A08	8582022	C	A
bna238180	A08	8591972	A	T
bna238182	A08	8592021	T	A
bna238213	A08	8600297	A	T
bna238268	A08	8675698	T	G
bna238271	A08	8680717	G	C
bna238279	A08	8703375	T	C
bna238280	A08	8705629	C	T
bna238308	A08	8767822	T	G
bna238356	A08	8838180	G	A
bna238446	A08	8916587	G	T
bna238492	A08	8931966	G	T
bna238494	A08	8932012	A	G
bna238511	A08	8950217	A	T
bna238525	A08	9023791	A	T
bna238528	A08	9024122	A	G
bna238577	A08	9118249	A	G
bna238592	A08	9131441	A	T
bna238630	A08	9174054	C	G
bna238645	A08	9178153	T	A
bna238661	A08	9190584	G	C
bna238662	A08	9193112	G	T
bna238667	A08	9195196	A	T
bna238669	A08	9195470	C	A
bna238786	A08	9359899	A	G
bna238787	A08	9359964	C	T
bna238828	A08	9371712	A	G
bna238829	A08	9371801	T	C
bna238834	A08	9381198	G	A
bna238835	A08	9381472	T	A
bna238928	A08	9733786	A	C
bna239026	A08	10041688	T	C
bna239050	A08	10074832	A	T
bna239073	A08	10126761	G	A
bna239079	A08	10141564	A	G
bna239090	A08	10200810	G	T
bna239091	A08	10200844	G	C
bna239092	A08	10200908	A	G
bna239143	A08	10284850	T	A
bna239159	A08	10300256	G	C
bna239259	A08	10438295	C	T
bna239368	A08	10488614	G	C
bna239369	A08	10488692	T	C
bna239373	A08	10492265	T	G
bna239375	A08	10492425	G	T
bna239384	A08	10496527	T	C
bna239407	A08	10516241	A	T
bna239408	A08	10516434	T	C
bna239410	A08	10516478	G	C
bna239411	A08	10516743	A	G
bna239438	A08	10524722	A	T
bna239453	A08	10531253	A	C
bna239483	A08	10565421	C	A
bna239484	A08	10565505	C	A
bna239515	A08	10592436	A	C
bna239558	A08	10626237	G	A
bna239588	A08	10659724	C	T
bna239632	A08	10705280	A	G
bna239698	A08	10743663	G	A
bna239794	A08	10778264	G	A
bna239866	A08	10832079	C	A
bna239879	A08	10835070	A	G
bna239969	A08	10893778	A	G
bna239976	A08	10906666	A	G
bna240036	A08	10991906	A	G
bna240037	A08	10992004	G	T
bna240105	A08	11096364	G	A
bna240271	A08	11334334	C	T
bna240306	A08	11421605	T	G
bna240358	A08	11479714	A	C
bna240373	A08	11500352	A	C
bna240430	A08	11564788	G	A
bna240556	A08	11748344	A	T
bna240678	A08	11892498	C	T
bna240679	A08	11899620	A	T
bna240680	A08	11899644	T	A
bna240681	A08	11902192	T	C
bna240682	A08	11902203	G	C
bna240684	A08	11902414	G	A
bna240685	A08	11902542	A	T
bna240719	A08	11965184	A	C
bna240746	A08	12055828	T	C
bna240807	A08	12190044	G	A
bna240808	A08	12190231	C	T
bna240810	A08	12190306	G	A
bna240811	A08	12190340	T	C
bna240812	A08	12190369	A	G
bna240960	A08	12461995	A	G
bna241180	A08	12795762	A	T
bna241189	A08	12837935	A	C
bna241504	A08	13350701	C	T
bna241506	A08	13350724	T	G
bna241507	A08	13350910	C	T
bna241513	A08	13358185	T	C
bna241645	A08	13507422	C	T
bna241664	A08	13514798	C	T
bna242650	A08	14134928	G	A
bna243012	A08	14309033	A	G
bna243052	A08	14392319	T	A
bna243081	A08	14477544	G	T
bna243099	A08	14481126	C	G
bna243100	A08	14481330	A	C
bna248714	A09	103757	C	A
bna249662	A09	904102	C	G
bna249824	A09	1309537	T	A
bna249873	A09	1451484	G	C
bna249954	A09	1552498	C	T
bna249955	A09	1552555	C	A
bna250195	A09	1853433	C	G
bna250198	A09	1853707	A	G
bna250199	A09	1853726	A	C
bna250200	A09	1853732	G	A
bna250247	A09	1923575	G	A
bna250253	A09	1948609	A	G
bna250326	A09	2137544	T	C
bna250331	A09	2138047	G	C
bna250338	A09	2138826	G	A
bna250340	A09	2138962	G	A
bna250341	A09	2139022	T	A
bna250342	A09	2139035	A	C
bna250344	A09	2139257	A	T
bna250347	A09	2139506	G	A
bna250349	A09	2139608	G	A
bna250351	A09	2139838	A	G
bna250352	A09	2139849	G	C
bna250358	A09	2149195	A	G
bna250428	A09	2260609	C	G
bna250497	A09	2327080	A	G
bna250498	A09	2327123	A	T
bna250529	A09	2371404	A	G
bna250530	A09	2371616	G	A
bna250551	A09	2375677	A	G
bna250561	A09	2379573	C	T
bna250562	A09	2379664	C	T
bna250563	A09	2379698	A	G
bna250566	A09	2380086	G	A
bna250581	A09	2383329	G	T
bna250592	A09	2388201	G	A
bna250631	A09	2416657	A	G
bna250632	A09	2416716	G	T
bna250633	A09	2416828	A	G
bna250634	A09	2416853	A	T
bna250688	A09	2555670	T	C
bna250699	A09	2574137	C	G
bna250700	A09	2574150	G	A
bna250711	A09	2626529	A	T
bna250713	A09	2627194	T	C
bna250733	A09	2746958	A	G
bna250744	A09	2780464	G	A
bna250766	A09	2849893	C	T
bna250769	A09	2850050	G	A
bna250776	A09	2860621	G	A
bna250777	A09	2860635	A	G
bna250792	A09	2890645	A	G
bna250794	A09	2896527	G	T
bna250795	A09	2909891	G	A
bna250865	A09	3135605	G	T
bna250881	A09	3175682	G	A
bna250919	A09	3233841	G	A
bna250972	A09	3297659	T	A
bna251041	A09	3697027	C	T
bna251093	A09	3807125	A	C
bna251094	A09	3807152	T	A
bna251246	A09	3925044	C	T
bna251493	A09	4347808	A	G
bna251511	A09	4381894	T	C
bna251785	A09	4915883	T	G
bna251794	A09	4925205	G	A
bna251857	A09	4947424	T	C
bna251893	A09	4959576	C	T
bna251895	A09	4959643	A	G
bna252182	A09	5066781	G	A
bna252188	A09	5072581	C	A
bna253584	A09	6339641	G	T
bna254586	A09	8095199	A	T
bna254634	A09	8146579	A	T
bna257132	A09	9031725	T	C
bna257133	A09	9031738	A	C
bna257260	A09	9068150	C	G
bna266884	A09	16340568	C	G
bna26995	A01	18512073	G	A
bna27136	A01	18600248	C	T
bna27137	A01	18600301	G	A
bna27216	A01	18667570	C	T
bna27217	A01	18667688	A	T
bna27219	A01	18667807	A	C
bna27221	A01	18668814	A	T
bna27222	A01	18669189	C	T
bna27223	A01	18669281	C	T
bna275459	A09	21146412	G	A
bna275532	A09	21286001	C	T
bna275623	A09	21507978	G	A
bna275631	A09	21530419	T	A
bna276568	A09	22358816	T	A
bna276708	A09	22609688	C	T
bna277039	A09	22728921	T	G
bna277040	A09	22728950	G	T
bna277042	A09	22729191	A	G
bna277043	A09	22729206	T	G
bna277044	A09	22729288	G	T
bna27754	A01	19199708	T	C
bna27755	A01	19200155	A	G
bna278425	A09	24769930	G	A
bna27857	A01	19288118	C	T
bna278993	A09	25278937	G	T
bna279847	A09	26199617	A	G
bna279851	A09	26207136	A	C
bna279892	A09	26215521	A	G
bna279902	A09	26228260	A	T
bna279975	A09	26247279	G	C
bna279997	A09	26264094	T	A
bna279998	A09	26264123	C	T
bna280140	A09	26370274	T	C
bna280142	A09	26370395	G	T
bna28127	A01	19481345	A	G
bna283418	A09	27844277	A	C
bna28385	A01	19626893	C	T
bna286365	A09	30120368	A	T
bna286429	A09	30127585	G	T
bna286713	A09	30294097	G	A
bna287013	A09	30484052	C	G
bna28788	A01	19807252	T	C
bna288663	A09	32014895	G	A
bna288666	A09	32019314	A	C
bna28875	A01	19837915	C	T
bna289445	A09	33583657	T	C
bna29079	A01	19913831	G	A
bna292994	A10	1965494	G	A
bna293089	A10	2028034	G	A
bna293090	A10	2028046	A	T
bna293091	A10	2028164	T	C
bna293092	A10	2028329	T	A
bna293146	A10	2070408	C	A
bna293466	A10	2417068	G	T
bna293467	A10	2417578	C	T
bna293485	A10	2434478	A	G
bna296280	A10	4977719	C	A
bna296288	A10	4980536	C	T
bna296289	A10	4980723	A	G
bna296940	A10	5858697	T	C
bna296981	A10	5919727	A	G
bna298823	A10	7721745	T	A
bna29930	A01	20679730	T	C
bna30375	A01	21086224	A	G
bna304711	A10	11928381	T	A
bna304983	A10	12120244	G	A
bna307145	A10	13405006	G	T
bna307146	A10	13405190	A	T
bna307818	A10	13758505	A	G
bna308015	A10	13818398	T	G
bna308019	A10	13821041	T	A
bna308020	A10	13821416	T	G
bna309153	A10	14253459	G	A
bna309156	A10	14253638	T	A
bna309232	A10	14296484	A	G
bna310411	A10	15110527	G	C
bna310873	A10	15316253	G	A
bna310887	A10	15323915	C	T
bna315235	C01	1837388	A	G
bna315272	C01	1893983	T	A
bna315312	C01	1931581	G	A
bna315345	C01	1946076	T	C
bna316455	C01	3615141	G	A
bna316502	C01	3632405	T	C
bna34433	A02	1728357	C	G
bna34513	A02	1755828	G	T
bna34537	A02	1775680	T	C
bna351571	C02	13117	G	A
bna35274	A02	2551339	A	T
bna355040	C02	1664576	A	G
bna355041	C02	1664584	G	C
bna355043	C02	1664625	G	A
bna357576	C02	3525122	G	A
bna358418	C02	4348942	T	A
bna358421	C02	4349074	A	C
bna358453	C02	4439574	C	T
bna359528	C02	6386410	T	A
bna36188	A02	3316602	C	G
bna362480	C02	9120097	G	A
bna362481	C02	9120106	A	G
bna362732	C02	9663513	G	A
bna36779	A02	3815387	G	T
bna39792	A02	5504382	G	T
bna40398	A02	5913103	T	C
bna406946	C02	36311524	A	C
bna406947	C02	36311600	G	T
bna406949	C02	36311740	G	A
bna407888	C02	38358751	A	G
bna407941	C02	38673895	G	A
bna40909	A02	6132424	T	G
bna412425	C02	43898190	C	T
bna412433	C02	43898427	T	C
bna412442	C02	43914970	C	T
bna41262	A02	6320515	G	A
bna412888	C02	44837917	A	G
bna412910	C02	44926609	T	A
bna412943	C02	44991771	T	C
bna413051	C02	45219365	T	C
bna41306	A02	6331443	C	G
bna413069	C02	45252301	G	C
bna41308	A02	6331609	G	C
bna41309	A02	6331635	G	C
bna413099	C02	45418400	C	T
bna413129	C02	45432443	C	A
bna413168	C02	45529520	C	T
bna413271	C02	45635665	A	T
bna413317	C02	45772689	G	A
bna413318	C02	45772874	G	A
bna413332	C02	45787509	A	T
bna413359	C02	45822556	C	G
bna413429	C02	45848967	T	G
bna413431	C02	45849095	G	A
bna413432	C02	45849115	G	A
bna413458	C02	45861334	T	C
bna413472	C02	45864857	G	A
bna41778	A02	6681332	A	T
bna418030	C03	2838021	C	T
bna418243	C03	3127731	T	C
bna41844	A02	6731714	C	T
bna418451	C03	3197019	A	T
bna418452	C03	3197173	A	G
bna41847	A02	6732008	A	C
bna41848	A02	6732095	C	T
bna41888	A02	6759817	G	A
bna419203	C03	3774099	C	T
bna42019	A02	6833951	A	C
bna42020	A02	6834056	T	C
bna42021	A02	6834064	A	G
bna421515	C03	5497790	G	A
bna421516	C03	5497863	G	T
bna421517	C03	5497869	T	C
bna421518	C03	5497962	A	T
bna421519	C03	5497991	T	G
bna421520	C03	5497999	G	A
bna421521	C03	5498232	G	T
bna421541	C03	5512494	C	A
bna427296	C03	11065550	G	A
bna427297	C03	11065908	A	T
bna427298	C03	11065922	T	C
bna427299	C03	11066032	A	C
bna427300	C03	11066047	G	T
bna429150	C03	11871943	T	G
bna429987	C03	12070524	A	G
bna437935	C03	18335713	T	C
bna437936	C03	18335722	G	A
bna437937	C03	18335732	T	C
bna440563	C03	21921312	T	A
bna440574	C03	21935343	T	C
bna440575	C03	21935350	A	T
bna440576	C03	21935358	T	G
bna442142	C03	25889777	C	T
bna442201	C03	25993803	A	T
bna442233	C03	26025549	T	G
bna442235	C03	26025676	A	T
bna442237	C03	26025728	G	A
bna442248	C03	26032186	A	T
bna442249	C03	26032210	A	T
bna442286	C03	26132346	G	T
bna442514	C03	26493411	G	A
bna442820	C03	26741436	G	A
bna442822	C03	26741834	C	G
bna44536	A02	8709918	T	C
bna45196	A02	9396265	A	G
bna45199	A02	9396470	C	T
bna45200	A02	9396591	C	G
bna456194	C03	45948899	A	G
bna456196	C03	45948930	A	G
bna456197	C03	45949056	A	C
bna456661	C03	46332608	A	C
bna458642	C03	48709826	C	T
bna459603	C03	50094097	C	T
bna459695	C03	50358356	G	A
bna459696	C03	50358383	T	A
bna459697	C03	50358389	A	G
bna460118	C03	51090059	C	T
bna460119	C03	51090086	C	T
bna460219	C03	51314229	G	A
bna460456	C03	51610008	C	A
bna460457	C03	51610021	G	A
bna460461	C03	51614282	A	C
bna460466	C03	51647582	C	T
bna460571	C03	52039202	T	C
bna460712	C03	52348842	G	T
bna460729	C03	52379415	G	A
bna460772	C03	52655513	C	T
bna460773	C03	52655552	A	G
bna460776	C03	52655627	G	T
bna460778	C03	52655716	C	T
bna461354	C03	53764695	C	G
bna461405	C03	53914661	G	A
bna461528	C03	54504142	C	A
bna461650	C03	54635647	G	T
bna462307	C03	57112109	C	G
bna462400	C03	57460915	T	A
bna462449	C03	57590091	T	C
bna462516	C03	57684858	A	G
bna462568	C03	57832818	T	G
bna462587	C03	57862366	T	G
bna462588	C03	57862392	T	C
bna462704	C03	58256930	C	T
bna462705	C03	58256979	G	T
bna462812	C03	58474452	G	T
bna462941	C03	58836574	T	C
bna462942	C03	58836585	G	T
bna463043	C03	58967551	G	A
bna463068	C03	59042184	G	A
bna464740	C04	1859994	T	G
bna464741	C04	1860139	A	G
bna464753	C04	1880450	T	C
bna466729	C04	3608120	A	T
bna466966	C04	3937695	T	C
bna470186	C04	7023908	G	A
bna48998	A02	11899150	G	A
bna496271	C04	40915827	T	A
bna499891	C04	46988032	A	C
bna501025	C05	653358	C	T
bna501037	C05	664209	G	A
bna501038	C05	664284	G	T
bna501330	C05	1012071	C	G
bna501331	C05	1012119	A	G
bna501332	C05	1012552	A	G
bna504986	C05	5942694	A	G
bna514675	C05	29877691	C	T
bna514676	C05	29877698	G	A
bna514677	C05	29877825	C	T
bna514679	C05	29877921	G	T
bna514680	C05	29877981	A	G
bna514681	C05	29878100	T	A
bna514702	C05	29887432	G	C
bna514703	C05	29887501	G	A
bna514704	C05	29887507	C	G
bna514705	C05	29887516	G	C
bna514824	C05	29910111	C	T
bna514829	C05	29910330	T	A
bna514860	C05	29919387	A	T
bna514867	C05	29922471	A	G
bna514868	C05	29922563	C	T
bna514869	C05	29922712	C	A
bna514887	C05	29924629	C	T
bna514893	C05	29924781	C	G
bna514894	C05	29924789	G	C
bna514895	C05	29924840	T	C
bna514896	C05	29924978	C	T
bna514897	C05	29925015	T	C
bna514957	C05	29942972	T	C
bna514989	C05	29957399	T	C
bna515077	C05	29967319	A	G
bna515078	C05	29967373	G	A
bna515079	C05	29967406	G	A
bna515139	C05	29983364	C	G
bna515140	C05	29983516	A	C
bna515141	C05	29983587	C	A
bna515168	C05	29986264	T	A
bna515170	C05	29986666	G	T
bna515171	C05	29986685	G	A
bna515172	C05	29986709	A	G
bna515216	C05	29989786	G	C
bna515220	C05	29990260	G	A
bna515460	C05	30027018	A	G
bna515548	C05	30035246	A	C
bna515549	C05	30035423	A	G
bna515550	C05	30035451	A	C
bna515551	C05	30035470	A	T
bna515553	C05	30035538	A	G
bna515554	C05	30035594	A	C
bna515556	C05	30035668	C	T
bna515712	C05	30137493	A	G
bna515790	C05	30157641	T	C
bna515791	C05	30157653	C	T
bna515792	C05	30157670	C	T
bna515807	C05	30160300	A	C
bna515808	C05	30160373	C	T
bna515812	C05	30160688	A	T
bna515849	C05	30166936	A	G
bna515850	C05	30166999	G	A
bna515856	C05	30169887	G	A
bna515864	C05	30171703	G	T
bna515865	C05	30171815	A	C
bna515867	C05	30171861	T	A
bna516362	C05	30285397	A	T
bna516363	C05	30285458	A	G
bna517578	C05	30455511	T	G
bna517792	C05	30492322	T	A
bna518259	C05	30572855	T	C
bna518294	C05	30605765	T	C
bna518327	C05	30629649	C	T
bna518383	C05	30660845	G	A
bna518385	C05	30660872	G	A
bna518386	C05	30660947	A	G
bna518390	C05	30661162	C	T
bna518394	C05	30661418	C	A
bna518395	C05	30661464	A	C
bna518396	C05	30661517	A	G
bna518397	C05	30661658	A	T
bna518398	C05	30661674	T	C
bna518460	C05	30674920	G	A
bna518461	C05	30675090	A	G
bna518462	C05	30675130	T	A
bna518494	C05	30681518	C	T
bna518495	C05	30681528	A	G
bna518496	C05	30681542	A	G
bna518498	C05	30681704	C	A
bna518499	C05	30681729	T	C
bna518545	C05	30683960	T	G
bna518546	C05	30683966	C	A
bna518547	C05	30684061	C	T
bna518548	C05	30684426	G	T
bna518567	C05	30691338	T	A
bna525082	C05	38585206	C	T
bna534503	C06	6102423	C	T
bna534506	C06	6102712	C	T
bna538388	C06	9572357	G	A
bna541406	C06	12198435	A	G
bna541407	C06	12198559	G	A
bna542727	C06	12909550	A	T
bna546557	C06	22730798	A	T
bna551682	C06	28657080	G	A
bna551719	C06	28708795	G	C
bna552274	C06	30082186	T	A
bna557616	C06	35823333	T	C
bna557623	C06	35826884	C	T
bna558410	C07	1159408	T	C
bna55882	A02	20968484	A	G
bna55912	A02	21009749	T	A
bna55913	A02	21011271	C	T
bna55914	A02	21011377	A	G
bna56596	A02	22186018	C	G
bna57393	A02	23029604	C	T
bna57394	A02	23029612	A	G
bna57396	A02	23029697	G	A
bna58263	A02	23992528	G	A
bna58615	A02	24305505	A	G
bna592576	C07	17934999	A	C
bna5962	A01	3425874	A	G
bna5964	A01	3427677	T	A
bna597206	C07	27224285	G	C
bna597207	C07	27224307	A	T
bna597348	C07	27308325	T	C
bna597431	C07	27367508	A	G
bna597433	C07	27367726	G	T
bna597434	C07	27367757	C	T
bna597435	C07	27367784	T	G
bna597437	C07	27367808	A	G
bna597438	C07	27367838	C	T
bna597651	C07	27414142	C	G
bna597771	C07	27459462	T	A
bna597773	C07	27459544	A	G
bna597774	C07	27459589	C	G
bna597786	C07	27461132	C	G
bna597788	C07	27461164	C	T
bna597790	C07	27461225	G	A
bna599654	C07	31880804	C	G
bna599804	C07	32131315	G	A
bna599806	C07	32131420	A	G
bna599863	C07	32151618	T	C
bna599864	C07	32151823	T	A
bna600023	C07	32524231	G	T
bna600024	C07	32524273	A	T
bna600025	C07	32524398	T	G
bna600053	C07	32546689	T	A
bna600106	C07	32605462	A	G
bna600109	C07	32609544	A	T
bna600126	C07	32617073	C	A
bna600127	C07	32617092	A	C
bna600128	C07	32617189	T	G
bna600354	C07	33165556	C	T
bna600356	C07	33165574	C	G
bna600357	C07	33165728	A	G
bna600358	C07	33165766	G	A
bna600359	C07	33165799	T	G
bna601033	C07	34855492	A	T
bna601034	C07	34855517	C	A
bna601035	C07	34855659	G	T
bna601036	C07	34855690	C	T
bna601076	C07	34889614	C	T
bna601092	C07	34960279	A	C
bna601312	C07	35717088	A	T
bna601316	C07	35724522	C	T
bna601388	C07	36014606	G	A
bna601389	C07	36014655	T	A
bna601390	C07	36014760	T	C
bna601419	C07	36042237	G	T
bna601421	C07	36044375	C	T
bna601424	C07	36044417	T	C
bna601425	C07	36044423	C	T
bna601428	C07	36044666	C	A
bna601429	C07	36044717	C	T
bna601430	C07	36045357	C	T
bna601448	C07	36057670	A	T
bna601484	C07	36072205	T	A
bna601525	C07	36103913	T	G
bna601526	C07	36104001	C	T
bna601584	C07	36222273	C	T
bna601831	C07	36311775	A	G
bna602128	C07	36367786	T	A
bna603442	C07	37072992	C	T
bna603444	C07	37073088	C	A
bna603464	C07	37098666	G	C
bna603466	C07	37098698	G	C
bna603568	C07	37129336	C	T
bna603989	C07	37289592	T	C
bna603991	C07	37290536	T	C
bna605048	C07	37670382	T	A
bna605049	C07	37670406	T	C
bna605129	C07	37821382	G	A
bna610323	C07	42142458	C	A
bna610889	C07	43609443	T	G
bna62061	A03	2311679	T	A
bna62062	A03	2311689	C	A
bna620653	C08	7284121	G	A
bna62077	A03	2332687	T	A
bna62090	A03	2334110	G	A
bna62096	A03	2335409	A	G
bna62098	A03	2335476	T	C
bna621912	C08	14170494	G	A
bna62271	A03	2458180	G	A
bna62302	A03	2474275	T	C
bna62318	A03	2477000	C	A
bna62320	A03	2477169	A	T
bna62321	A03	2477585	T	G
bna62392	A03	2496696	G	A
bna62422	A03	2509426	T	G
bna62471	A03	2522839	A	G
bna62502	A03	2530178	A	T
bna62503	A03	2530288	A	C
bna62504	A03	2530460	G	A
bna62522	A03	2542394	C	T
bna62524	A03	2542431	T	G
bna62525	A03	2542443	A	G
bna62526	A03	2542683	A	G
bna62534	A03	2546353	C	A
bna62701	A03	2721538	G	T
bna62728	A03	2763850	C	T
bna627969	C08	27008237	C	T
bna62854	A03	2868161	T	C
bna62898	A03	2879569	A	G
bna629154	C08	27459761	A	G
bna629156	C08	27459972	G	A
bna629158	C08	27461275	T	C
bna62957	A03	2910571	T	G
bna62958	A03	2910708	A	C
bna629720	C08	27619847	G	T
bna629722	C08	27619942	A	G
bna629723	C08	27619953	T	C
bna629765	C08	27643384	C	T
bna629799	C08	27679292	C	T
bna629812	C08	27686906	A	G
bna62983	A03	2921509	G	T
bna630019	C08	27868599	T	C
bna630021	C08	27871365	G	C
bna630023	C08	27871526	C	T
bna630034	C08	27882057	G	A
bna63011	A03	2934287	C	T
bna63089	A03	2957482	A	G
bna63090	A03	2957725	C	T
bna63092	A03	2964602	C	T
bna631761	C08	29412835	A	T
bna631816	C08	29453851	T	C
bna631839	C08	29464105	G	A
bna631891	C08	29509203	G	A
bna631892	C08	29509224	A	G
bna631978	C08	29666558	G	C
bna634569	C08	33335422	C	G
bna634994	C08	34154211	C	T
bna63558	A03	3511027	A	T
bna63559	A03	3511161	G	T
bna63758	A03	3752734	G	A
bna63759	A03	3752791	G	A
bna63852	A03	3806566	G	A
bna640277	C09	2255	G	A
bna640279	C09	8723	T	A
bna640280	C09	8743	G	A
bna640336	C09	217518	G	A
bna640337	C09	217528	A	T
bna640366	C09	231000	A	T
bna640367	C09	231054	A	G
bna640368	C09	231077	T	G
bna640369	C09	231116	C	T
bna640370	C09	231186	A	G
bna640371	C09	231224	A	C
bna640372	C09	231245	A	C
bna640373	C09	231397	G	A
bna640385	C09	233196	C	G
bna640533	C09	475782	A	C
bna642327	C09	1537752	A	G
bna642328	C09	1538003	A	G
bna642576	C09	1625588	T	C
bna642647	C09	1639300	T	G
bna642714	C09	1648969	C	T
bna642822	C09	1678157	T	C
bna642824	C09	1679865	C	A
bna642826	C09	1680246	C	G
bna642852	C09	1691152	T	C
bna642853	C09	1691288	T	A
bna642856	C09	1693554	C	T
bna642899	C09	1710074	G	A
bna642926	C09	1722560	T	C
bna642956	C09	1727578	G	A
bna642957	C09	1727586	A	G
bna642960	C09	1727887	G	A
bna643013	C09	1738164	T	C
bna643014	C09	1738283	C	T
bna643066	C09	1754708	T	C
bna643069	C09	1757293	G	A
bna643070	C09	1757371	G	A
bna643095	C09	1772527	T	C
bna643133	C09	1809777	A	G
bna643134	C09	1810010	C	T
bna643135	C09	1810060	G	A
bna643146	C09	1810751	C	T
bna643147	C09	1810999	A	T
bna643149	C09	1811085	T	G
bna643183	C09	1813311	C	T
bna643184	C09	1813367	C	T
bna643185	C09	1813387	G	A
bna643187	C09	1813566	G	A
bna643188	C09	1813573	A	C
bna643189	C09	1813626	A	G
bna643190	C09	1813639	T	C
bna643191	C09	1813696	A	G
bna643192	C09	1813766	A	G
bna643193	C09	1813772	C	A
bna643210	C09	1817913	C	T
bna643244	C09	1907789	C	T
bna643284	C09	1922896	C	T
bna643287	C09	1927312	A	T
bna643305	C09	1955389	A	G
bna643307	C09	1955580	T	A
bna643308	C09	1962244	C	T
bna643316	C09	1970042	G	A
bna643352	C09	1988127	T	C
bna643367	C09	1991723	T	C
bna64355	A03	4082594	T	C
bna643745	C09	2165356	T	C
bna643784	C09	2199588	C	T
bna643785	C09	2199594	T	C
bna643786	C09	2199605	G	C
bna643837	C09	2245591	C	T
bna643838	C09	2245606	T	G
bna643883	C09	2318652	A	G
bna643895	C09	2361205	T	C
bna643897	C09	2362126	C	T
bna643899	C09	2362235	G	T
bna643938	C09	2396353	T	G
bna643939	C09	2396369	T	C
bna644008	C09	2495836	G	T
bna644014	C09	2504494	C	T
bna644016	C09	2504713	A	G
bna644033	C09	2516816	C	T
bna644034	C09	2516981	C	A
bna644035	C09	2517003	T	C
bna644036	C09	2517039	G	A
bna644063	C09	2533730	T	C
bna644064	C09	2534223	T	C
bna644107	C09	2569295	T	A
bna644237	C09	2653844	A	G
bna644238	C09	2653974	T	C
bna644240	C09	2654027	G	A
bna644301	C09	2715580	C	A
bna644354	C09	2731324	G	A
bna644355	C09	2731388	G	T
bna644426	C09	2765955	C	G
bna644448	C09	2783498	T	G
bna644472	C09	2794743	A	T
bna644473	C09	2794825	T	A
bna644474	C09	2794949	T	C
bna644476	C09	2798316	C	T
bna644477	C09	2798328	T	C
bna644478	C09	2798483	C	T
bna644479	C09	2798535	C	T
bna644560	C09	2807808	A	G
bna644561	C09	2807890	T	A
bna644562	C09	2807934	G	A
bna644563	C09	2807943	G	C
bna644564	C09	2808004	G	A
bna644565	C09	2808027	T	C
bna644597	C09	2812189	C	G
bna644599	C09	2812486	T	C
bna644600	C09	2812534	C	T
bna644602	C09	2812601	G	A
bna644603	C09	2812639	A	C
bna644634	C09	2834479	G	A
bna644644	C09	2838500	A	G
bna644645	C09	2838736	G	A
bna644646	C09	2838915	T	C
bna644661	C09	2843306	G	T
bna644662	C09	2843425	C	T
bna644663	C09	2843557	T	C
bna644664	C09	2843588	C	T
bna644666	C09	2843776	C	G
bna644692	C09	2848890	A	G
bna644693	C09	2849028	A	T
bna644694	C09	2849109	A	T
bna644767	C09	3008195	G	A
bna644768	C09	3008484	G	A
bna644803	C09	3010498	C	T
bna644805	C09	3010594	C	A
bna644807	C09	3010683	T	C
bna644808	C09	3010718	C	A
bna644809	C09	3010905	A	T
bna644836	C09	3020396	C	A
bna644844	C09	3024921	A	T
bna644845	C09	3025049	C	A
bna644861	C09	3029001	G	A
bna644862	C09	3029048	C	T
bna644863	C09	3029054	T	A
bna644864	C09	3029175	G	A
bna644910	C09	3088884	G	T
bna644924	C09	3134133	A	G
bna644925	C09	3134139	T	C
bna644926	C09	3134180	G	A
bna644927	C09	3134265	T	G
bna644997	C09	3153831	C	G
bna644998	C09	3153930	C	T
bna645023	C09	3214275	C	T
bna645052	C09	3389834	G	A
bna645053	C09	3389940	G	A
bna645056	C09	3390211	T	C
bna645058	C09	3390316	G	C
bna645069	C09	3391683	A	T
bna645070	C09	3391755	T	C
bna645076	C09	3441600	A	G
bna645133	C09	3557639	G	C
bna645134	C09	3557668	A	G
bna645140	C09	3562842	C	T
bna645173	C09	3577927	G	A
bna645174	C09	3578095	G	A
bna645175	C09	3578135	G	T
bna645191	C09	3593989	C	T
bna645192	C09	3594039	T	A
bna645200	C09	3598108	T	A
bna645201	C09	3598365	T	G
bna645240	C09	3631067	C	T
bna645251	C09	3655374	C	A
bna645443	C09	4617571	G	T
bna645602	C09	5483694	T	C
bna645691	C09	5907982	C	T
bna645692	C09	5908252	T	C
bna645841	C09	6460512	G	A
bna645877	C09	6545348	C	T
bna646114	C09	6631835	A	T
bna647320	C09	7261217	T	C
bna647321	C09	7261235	G	A
bna64809	A03	4443515	G	A
bna648407	C09	8321509	T	C
bna648423	C09	8496419	A	T
bna65035	A03	4562868	C	G
bna65096	A03	4605457	T	C
bna651137	C09	15725497	T	C
bna6552	A01	4020460	C	T
bna65853	A03	4966753	C	T
bna66145	A03	5113828	C	T
bna6664	A01	4105323	C	A
bna6665	A01	4105333	G	A
bna6667	A01	4105483	T	A
bna6668	A01	4105864	G	A
bna6686	A01	4110230	G	A
bna71379	A03	7985136	A	G
bna74342	A03	9301737	A	C
bna74344	A03	9301798	A	G
bna76367	A03	11419044	T	C
bna76482	A03	11481698	A	G
bna76530	A03	11527056	A	G
bna76531	A03	11527074	C	T
bna76532	A03	11527081	T	C
bna76533	A03	11527091	G	A
bna79131	A03	13306471	C	T
bna79132	A03	13306493	A	T
bna81617	A03	14322790	C	T
bna8205	A01	5211733	T	A
bna8223	A01	5226393	T	C
bna87746	A03	19074187	T	A
bna89325	A03	19360297	G	C
bna89458	A03	19418370	A	G
bna91630	A03	20441491	A	T
bna958	A01	573138	T	G
bna96322	A03	23062264	A	G
bna96330	A03	23069427	A	G
bna96733	A03	23700076	C	G
bna98214	A03	25170242	G	A
bna98339	A03	25255434	G	T

## Sheet: important_rSNPs_flower
generic_snp_id	chr	snp_position	ref	alt
bna10595	A01	6773615	A	T
bna10596	A01	6773628	A	G
bna124301	A04	14258416	A	G
bna134975	A05	1484908	A	C
bna134998	A05	1527226	C	T
bna143220	A05	6351547	T	C
bna154175	A05	17957939	G	A
bna156576	A05	20188479	G	C
bna157200	A05	20791066	G	A
bna157443	A05	20948986	T	G
bna157444	A05	20949031	G	T
bna157445	A05	20949099	C	T
bna157446	A05	20949124	C	T
bna157447	A05	20949151	A	G
bna157805	A05	21459284	A	G
bna158306	A05	21638825	T	C
bna173730	A06	10233046	T	A
bna177228	A06	16148153	T	G
bna177302	A06	16230331	A	G
bna179806	A06	18010395	A	G
bna184923	A06	22085688	G	A
bna185402	A06	22198161	C	T
bna185403	A06	22198291	C	T
bna185641	A06	22460604	T	G
bna185642	A06	22460697	G	A
bna185643	A06	22460727	C	A
bna213873	A07	12606767	A	C
bna213874	A07	12606784	T	A
bna222603	A07	17817178	T	C
bna231338	A08	2022527	A	G
bna233602	A08	3221027	C	A
bna233603	A08	3221064	C	T
bna233604	A08	3221072	C	A
bna233605	A08	3221082	C	T
bna233606	A08	3221104	C	G
bna234852	A08	5333697	G	A
bna235198	A08	5634860	C	T
bna236507	A08	7012167	G	T
bna236508	A08	7012255	T	A
bna236589	A08	7070552	C	T
bna237981	A08	8365657	C	T
bna238019	A08	8478981	G	A
bna238268	A08	8675698	T	G
bna238308	A08	8767822	T	G
bna238356	A08	8838180	G	A
bna239026	A08	10041688	T	C
bna239050	A08	10074832	A	T
bna239259	A08	10438295	C	T
bna239438	A08	10524722	A	T
bna240036	A08	10991906	A	G
bna240037	A08	10992004	G	T
bna240373	A08	11500352	A	C
bna240556	A08	11748344	A	T
bna240679	A08	11899620	A	T
bna240680	A08	11899644	T	A
bna241513	A08	13358185	T	C
bna243052	A08	14392319	T	A
bna248714	A09	103757	C	A
bna249662	A09	904102	C	G
bna250253	A09	1948609	A	G
bna250428	A09	2260609	C	G
bna250631	A09	2416657	A	G
bna250632	A09	2416716	G	T
bna250633	A09	2416828	A	G
bna250634	A09	2416853	A	T
bna250744	A09	2780464	G	A
bna250794	A09	2896527	G	T
bna250865	A09	3135605	G	T
bna251493	A09	4347808	A	G
bna251794	A09	4925205	G	A
bna252182	A09	5066781	G	A
bna252188	A09	5072581	C	A
bna26995	A01	18512073	G	A
bna27221	A01	18668814	A	T
bna27222	A01	18669189	C	T
bna27223	A01	18669281	C	T
bna28385	A01	19626893	C	T
bna288666	A09	32019314	A	C
bna296940	A10	5858697	T	C
bna310411	A10	15110527	G	C
bna315312	C01	1931581	G	A
bna315345	C01	1946076	T	C
bna34537	A02	1775680	T	C
bna351571	C02	13117	G	A
bna359528	C02	6386410	T	A
bna39792	A02	5504382	G	T
bna406946	C02	36311524	A	C
bna406947	C02	36311600	G	T
bna406949	C02	36311740	G	A
bna412425	C02	43898190	C	T
bna412433	C02	43898427	T	C
bna412943	C02	44991771	T	C
bna413051	C02	45219365	T	C
bna413429	C02	45848967	T	G
bna413431	C02	45849095	G	A
bna413432	C02	45849115	G	A
bna418030	C03	2838021	C	T
bna442233	C03	26025549	T	G
bna442235	C03	26025676	A	T
bna442237	C03	26025728	G	A
bna442286	C03	26132346	G	T
bna45196	A02	9396265	A	G
bna45199	A02	9396470	C	T
bna45200	A02	9396591	C	G
bna459695	C03	50358356	G	A
bna459696	C03	50358383	T	A
bna459697	C03	50358389	A	G
bna461405	C03	53914661	G	A
bna462400	C03	57460915	T	A
bna501037	C05	664209	G	A
bna501038	C05	664284	G	T
bna514824	C05	29910111	C	T
bna514829	C05	29910330	T	A
bna518294	C05	30605765	T	C
bna56596	A02	22186018	C	G
bna58615	A02	24305505	A	G
bna597431	C07	27367508	A	G
bna597433	C07	27367726	G	T
bna597434	C07	27367757	C	T
bna597435	C07	27367784	T	G
bna597437	C07	27367808	A	G
bna597438	C07	27367838	C	T
bna601033	C07	34855492	A	T
bna601034	C07	34855517	C	A
bna601035	C07	34855659	G	T
bna601036	C07	34855690	C	T
bna610323	C07	42142458	C	A
bna621912	C08	14170494	G	A
bna62701	A03	2721538	G	T
bna62854	A03	2868161	T	C
bna629765	C08	27643384	C	T
bna63011	A03	2934287	C	T
bna63089	A03	2957482	A	G
bna63090	A03	2957725	C	T
bna640279	C09	8723	T	A
bna640280	C09	8743	G	A
bna640336	C09	217518	G	A
bna640337	C09	217528	A	T
bna640366	C09	231000	A	T
bna640367	C09	231054	A	G
bna640368	C09	231077	T	G
bna640369	C09	231116	C	T
bna640370	C09	231186	A	G
bna640371	C09	231224	A	C
bna640372	C09	231245	A	C
bna640373	C09	231397	G	A
bna640385	C09	233196	C	G
bna642576	C09	1625588	T	C
bna642647	C09	1639300	T	G
bna642822	C09	1678157	T	C
bna642824	C09	1679865	C	A
bna642826	C09	1680246	C	G
bna642852	C09	1691152	T	C
bna642853	C09	1691288	T	A
bna642856	C09	1693554	C	T
bna642899	C09	1710074	G	A
bna642926	C09	1722560	T	C
bna643066	C09	1754708	T	C
bna643069	C09	1757293	G	A
bna643070	C09	1757371	G	A
bna643095	C09	1772527	T	C
bna643133	C09	1809777	A	G
bna643134	C09	1810010	C	T
bna643135	C09	1810060	G	A
bna643183	C09	1813311	C	T
bna643184	C09	1813367	C	T
bna643185	C09	1813387	G	A
bna643187	C09	1813566	G	A
bna643188	C09	1813573	A	C
bna643189	C09	1813626	A	G
bna643190	C09	1813639	T	C
bna643191	C09	1813696	A	G
bna643192	C09	1813766	A	G
bna643193	C09	1813772	C	A
bna643210	C09	1817913	C	T
bna643284	C09	1922896	C	T
bna643305	C09	1955389	A	G
bna643307	C09	1955580	T	A
bna643316	C09	1970042	G	A
bna643784	C09	2199588	C	T
bna643785	C09	2199594	T	C
bna643786	C09	2199605	G	C
bna643883	C09	2318652	A	G
bna644008	C09	2495836	G	T
bna644063	C09	2533730	T	C
bna644064	C09	2534223	T	C
bna644107	C09	2569295	T	A
bna644472	C09	2794743	A	T
bna644473	C09	2794825	T	A
bna644474	C09	2794949	T	C
bna644476	C09	2798316	C	T
bna644477	C09	2798328	T	C
bna644478	C09	2798483	C	T
bna644479	C09	2798535	C	T
bna644560	C09	2807808	A	G
bna644561	C09	2807890	T	A
bna644562	C09	2807934	G	A
bna644563	C09	2807943	G	C
bna644564	C09	2808004	G	A
bna644565	C09	2808027	T	C
bna644661	C09	2843306	G	T
bna644662	C09	2843425	C	T
bna644663	C09	2843557	T	C
bna644664	C09	2843588	C	T
bna644666	C09	2843776	C	G
bna644692	C09	2848890	A	G
bna644693	C09	2849028	A	T
bna644694	C09	2849109	A	T
bna644803	C09	3010498	C	T
bna644805	C09	3010594	C	A
bna644807	C09	3010683	T	C
bna644808	C09	3010718	C	A
bna644809	C09	3010905	A	T
bna644836	C09	3020396	C	A
bna644861	C09	3029001	G	A
bna644862	C09	3029048	C	T
bna644863	C09	3029054	T	A
bna644864	C09	3029175	G	A
bna644924	C09	3134133	A	G
bna644925	C09	3134139	T	C
bna644926	C09	3134180	G	A
bna644927	C09	3134265	T	G
bna645023	C09	3214275	C	T
bna645052	C09	3389834	G	A
bna645053	C09	3389940	G	A
bna645056	C09	3390211	T	C
bna645058	C09	3390316	G	C
bna645133	C09	3557639	G	C
bna645134	C09	3557668	A	G
bna645140	C09	3562842	C	T
bna645191	C09	3593989	C	T
bna645192	C09	3594039	T	A
bna645240	C09	3631067	C	T
bna645251	C09	3655374	C	A
bna645443	C09	4617571	G	T
bna645602	C09	5483694	T	C
bna645877	C09	6545348	C	T
bna646114	C09	6631835	A	T
bna647320	C09	7261217	T	C
bna647321	C09	7261235	G	A
bna648407	C09	8321509	T	C
bna6552	A01	4020460	C	T
bna71379	A03	7985136	A	G
bna89458	A03	19418370	A	G
bna98214	A03	25170242	G	A

## Sheet: important_rSNPs_leaf
generic_snp_id	chr	snp_position	ref	alt
bna124301	A04	14258416	A	G
bna133861	A04	19042835	C	T
bna185622	A06	22436289	G	T
bna227850	A07	22471208	G	A
bna227853	A07	22471804	T	A
bna231275	A08	1961079	C	T
bna233602	A08	3221027	C	A
bna233603	A08	3221064	C	T
bna233604	A08	3221072	C	A
bna233605	A08	3221082	C	T
bna233606	A08	3221104	C	G
bna236589	A08	7070552	C	T
bna238828	A08	9371712	A	G
bna238829	A08	9371801	T	C
bna239407	A08	10516241	A	T
bna239408	A08	10516434	T	C
bna240719	A08	11965184	A	C
bna240746	A08	12055828	T	C
bna252182	A09	5066781	G	A
bna276708	A09	22609688	C	T
bna28385	A01	19626893	C	T
bna315345	C01	1946076	T	C
bna359528	C02	6386410	T	A
bna36779	A02	3815387	G	T
bna412910	C02	44926609	T	A
bna413458	C02	45861334	T	C
bna418030	C03	2838021	C	T
bna42019	A02	6833951	A	C
bna42020	A02	6834056	T	C
bna42021	A02	6834064	A	G
bna442201	C03	25993803	A	T
bna460571	C03	52039202	T	C
bna501037	C05	664209	G	A
bna501038	C05	664284	G	T
bna515077	C05	29967319	A	G
bna515078	C05	29967373	G	A
bna515079	C05	29967406	G	A
bna601033	C07	34855492	A	T
bna601034	C07	34855517	C	A
bna601035	C07	34855659	G	T
bna601036	C07	34855690	C	T
bna610323	C07	42142458	C	A
bna620653	C08	7284121	G	A
bna62854	A03	2868161	T	C
bna629720	C08	27619847	G	T
bna629722	C08	27619942	A	G
bna629723	C08	27619953	T	C
bna630019	C08	27868599	T	C
bna640336	C09	217518	G	A
bna640337	C09	217528	A	T
bna643305	C09	1955389	A	G
bna643307	C09	1955580	T	A
bna643316	C09	1970042	G	A
bna643784	C09	2199588	C	T
bna643785	C09	2199594	T	C
bna643786	C09	2199605	G	C
bna644008	C09	2495836	G	T
bna644063	C09	2533730	T	C
bna644064	C09	2534223	T	C
bna644693	C09	2849028	A	T
bna644694	C09	2849109	A	T
bna644836	C09	3020396	C	A
bna644844	C09	3024921	A	T
bna644845	C09	3025049	C	A
bna644910	C09	3088884	G	T
bna65035	A03	4562868	C	G
bna89325	A03	19360297	G	C
bna89458	A03	19418370	A	G

## Sheet: important_rSNPs_stem
generic_snp_id	chr	snp_position	ref	alt
bna10595	A01	6773615	A	T
bna10596	A01	6773628	A	G
bna116677	A04	10682265	G	A
bna124301	A04	14258416	A	G
bna141761	A05	4812845	A	C
bna184923	A06	22085688	G	A
bna227850	A07	22471208	G	A
bna227853	A07	22471804	T	A
bna227881	A07	22475500	G	A
bna227882	A07	22475557	T	G
bna233602	A08	3221027	C	A
bna233603	A08	3221064	C	T
bna233604	A08	3221072	C	A
bna233605	A08	3221082	C	T
bna233606	A08	3221104	C	G
bna234852	A08	5333697	G	A
bna236507	A08	7012167	G	T
bna236508	A08	7012255	T	A
bna238834	A08	9381198	G	A
bna238835	A08	9381472	T	A
bna239050	A08	10074832	A	T
bna239143	A08	10284850	T	A
bna240679	A08	11899620	A	T
bna240680	A08	11899644	T	A
bna248714	A09	103757	C	A
bna249662	A09	904102	C	G
bna249954	A09	1552498	C	T
bna249955	A09	1552555	C	A
bna250631	A09	2416657	A	G
bna250632	A09	2416716	G	T
bna250633	A09	2416828	A	G
bna250634	A09	2416853	A	T
bna252182	A09	5066781	G	A
bna276708	A09	22609688	C	T
bna309153	A10	14253459	G	A
bna309156	A10	14253638	T	A
bna315312	C01	1931581	G	A
bna315345	C01	1946076	T	C
bna34433	A02	1728357	C	G
bna351571	C02	13117	G	A
bna359528	C02	6386410	T	A
bna39792	A02	5504382	G	T
bna413168	C02	45529520	C	T
bna442142	C03	25889777	C	T
bna442201	C03	25993803	A	T
bna45196	A02	9396265	A	G
bna45199	A02	9396470	C	T
bna45200	A02	9396591	C	G
bna462568	C03	57832818	T	G
bna600126	C07	32617073	C	A
bna600127	C07	32617092	A	C
bna600128	C07	32617189	T	G
bna603991	C07	37290536	T	C
bna605048	C07	37670382	T	A
bna605049	C07	37670406	T	C
bna620653	C08	7284121	G	A
bna62701	A03	2721538	G	T
bna640336	C09	217518	G	A
bna640337	C09	217528	A	T
bna642327	C09	1537752	A	G
bna642328	C09	1538003	A	G
bna642647	C09	1639300	T	G
bna642822	C09	1678157	T	C
bna642824	C09	1679865	C	A
bna642826	C09	1680246	C	G
bna642852	C09	1691152	T	C
bna642853	C09	1691288	T	A
bna642856	C09	1693554	C	T
bna642899	C09	1710074	G	A
bna643066	C09	1754708	T	C
bna643069	C09	1757293	G	A
bna643070	C09	1757371	G	A
bna643095	C09	1772527	T	C
bna643133	C09	1809777	A	G
bna643134	C09	1810010	C	T
bna643135	C09	1810060	G	A
bna643210	C09	1817913	C	T
bna643284	C09	1922896	C	T
bna643316	C09	1970042	G	A
bna643784	C09	2199588	C	T
bna643785	C09	2199594	T	C
bna643786	C09	2199605	G	C
bna643883	C09	2318652	A	G
bna644008	C09	2495836	G	T
bna644063	C09	2533730	T	C
bna644064	C09	2534223	T	C
bna644107	C09	2569295	T	A
bna644448	C09	2783498	T	G
bna644472	C09	2794743	A	T
bna644473	C09	2794825	T	A
bna644474	C09	2794949	T	C
bna644476	C09	2798316	C	T
bna644477	C09	2798328	T	C
bna644478	C09	2798483	C	T
bna644479	C09	2798535	C	T
bna644560	C09	2807808	A	G
bna644561	C09	2807890	T	A
bna644562	C09	2807934	G	A
bna644563	C09	2807943	G	C
bna644564	C09	2808004	G	A
bna644565	C09	2808027	T	C
bna644661	C09	2843306	G	T
bna644662	C09	2843425	C	T
bna644663	C09	2843557	T	C
bna644664	C09	2843588	C	T
bna644666	C09	2843776	C	G
bna644692	C09	2848890	A	G
bna644693	C09	2849028	A	T
bna644694	C09	2849109	A	T
bna644803	C09	3010498	C	T
bna644805	C09	3010594	C	A
bna644807	C09	3010683	T	C
bna644808	C09	3010718	C	A
bna644809	C09	3010905	A	T
bna644836	C09	3020396	C	A
bna644844	C09	3024921	A	T
bna644845	C09	3025049	C	A
bna644861	C09	3029001	G	A
bna644862	C09	3029048	C	T
bna644863	C09	3029054	T	A
bna644864	C09	3029175	G	A
bna644924	C09	3134133	A	G
bna644925	C09	3134139	T	C
bna644926	C09	3134180	G	A
bna644927	C09	3134265	T	G
bna645023	C09	3214275	C	T
bna645052	C09	3389834	G	A
bna645053	C09	3389940	G	A
bna645056	C09	3390211	T	C
bna645058	C09	3390316	G	C
bna645076	C09	3441600	A	G
bna645133	C09	3557639	G	C
bna645134	C09	3557668	A	G
bna645191	C09	3593989	C	T
bna645192	C09	3594039	T	A
bna645240	C09	3631067	C	T
bna645443	C09	4617571	G	T
bna645602	C09	5483694	T	C
bna645877	C09	6545348	C	T
bna648423	C09	8496419	A	T
bna65035	A03	4562868	C	G
bna89458	A03	19418370	A	G

## Sheet: important_rSNPs_root
generic_snp_id	chr	snp_position	ref	alt
bna10595	A01	6773615	A	T
bna10596	A01	6773628	A	G
bna143220	A05	6351547	T	C
bna154175	A05	17957939	G	A
bna1960	A01	999838	C	T
bna231338	A08	2022527	A	G
bna238180	A08	8591972	A	T
bna238182	A08	8592021	T	A
bna238834	A08	9381198	G	A
bna238835	A08	9381472	T	A
bna239050	A08	10074832	A	T
bna248714	A09	103757	C	A
bna249662	A09	904102	C	G
bna252182	A09	5066781	G	A
bna315345	C01	1946076	T	C
bna34433	A02	1728357	C	G
bna351571	C02	13117	G	A
bna413168	C02	45529520	C	T
bna442201	C03	25993803	A	T
bna620653	C08	7284121	G	A
bna62701	A03	2721538	G	T
bna642647	C09	1639300	T	G
bna642822	C09	1678157	T	C
bna642824	C09	1679865	C	A
bna642826	C09	1680246	C	G
bna642852	C09	1691152	T	C
bna642853	C09	1691288	T	A
bna642856	C09	1693554	C	T
bna642899	C09	1710074	G	A
bna643066	C09	1754708	T	C
bna643133	C09	1809777	A	G
bna643134	C09	1810010	C	T
bna643135	C09	1810060	G	A
bna643210	C09	1817913	C	T
bna643316	C09	1970042	G	A
bna643352	C09	1988127	T	C
bna643784	C09	2199588	C	T
bna643785	C09	2199594	T	C
bna643786	C09	2199605	G	C
bna643883	C09	2318652	A	G
bna644008	C09	2495836	G	T
bna644063	C09	2533730	T	C
bna644064	C09	2534223	T	C
bna644107	C09	2569295	T	A
bna644448	C09	2783498	T	G
bna644472	C09	2794743	A	T
bna644473	C09	2794825	T	A
bna644474	C09	2794949	T	C
bna644560	C09	2807808	A	G
bna644561	C09	2807890	T	A
bna644562	C09	2807934	G	A
bna644563	C09	2807943	G	C
bna644564	C09	2808004	G	A
bna644565	C09	2808027	T	C
bna644692	C09	2848890	A	G
bna644693	C09	2849028	A	T
bna644694	C09	2849109	A	T
bna644803	C09	3010498	C	T
bna644805	C09	3010594	C	A
bna644807	C09	3010683	T	C
bna644808	C09	3010718	C	A
bna644809	C09	3010905	A	T
bna644861	C09	3029001	G	A
bna644862	C09	3029048	C	T
bna644863	C09	3029054	T	A
bna644864	C09	3029175	G	A
bna644924	C09	3134133	A	G
bna644925	C09	3134139	T	C
bna644926	C09	3134180	G	A
bna644927	C09	3134265	T	G
bna645052	C09	3389834	G	A
bna645053	C09	3389940	G	A
bna645056	C09	3390211	T	C
bna645058	C09	3390316	G	C
bna645076	C09	3441600	A	G
bna645133	C09	3557639	G	C
bna645134	C09	3557668	A	G
bna645240	C09	3631067	C	T
bna645443	C09	4617571	G	T
bna645602	C09	5483694	T	C
bna645877	C09	6545348	C	T
bna89458	A03	19418370	A	G
