# Supplementary material for: In Silico Identification of the Complex Interplay between Regulatory SNPs, Transcription Factors, and Their Related Genes in Brassica napus L. Using Multi-Omics Data
Source: MDPI journal article supplement (doi:10.3390/ijms22020789), 2021-01-14
Supplement: s1 [file s1 › Suppl_Material/Suppl_TableS6_DEGs_harboring_important_rSNPs_GO_BP_and_KEGG_enrichment.xlsx]

## Sheet: flower_DEGs_harboring_important
source	term_name	term_id	adjusted_p_value	negative_log10_of_adjusted_p_value	term_size	query_size	intersection_size	effective_domain_size	intersections
GO:BP	oxidation-reduction process	GO:0055114	0.0254029	1.59512	3602	145	18	80927	GSBRNA2T00130856001,GSBRNA2T00126907001,GSBRNA2T00126684001,GSBRNA2T00078802001,GSBRNA2T00021893001,GSBRNA2T00018219001,GSBRNA2T00018266001,GSBRNA2T00018263001,GSBRNA2T00018267001,GSBRNA2T00010065001,GSBRNA2T00134649001,GSBRNA2T00135033001,GSBRNA2T00057385001,GSBRNA2T00027085001,GSBRNA2T00146102001,GSBRNA2T00146034001,GSBRNA2T00120261001,GSBRNA2T00043435001
GO:BP	shikimate metabolic process	GO:0019632	0.244035	0.612547	4	145	1	80927	GSBRNA2T00027085001
GO:BP	tropism	GO:0009606	0.244035	0.612547	102	145	2	80927	GSBRNA2T00081614001,GSBRNA2T00088760001
GO:BP	cellular lipid biosynthetic process	GO:0097384	0.244035	0.612547	5	145	1	80927	GSBRNA2T00130161001
GO:BP	transcription initiation from RNA polymerase III promoter	GO:0006384	0.244035	0.612547	9	145	1	80927	GSBRNA2T00146223001
GO:BP	seryl-tRNA aminoacylation	GO:0006434	0.244035	0.612547	10	145	1	80927	GSBRNA2T00109450001
GO:BP	NAD metabolic process	GO:0019674	0.244035	0.612547	12	145	1	80927	GSBRNA2T00122385001
GO:BP	ergosterol metabolic process	GO:0008204	0.244035	0.612547	5	145	1	80927	GSBRNA2T00130161001
GO:BP	fatty acid derivative transport	GO:1901571	0.244035	0.612547	12	145	1	80927	GSBRNA2T00115966001
GO:BP	secondary alcohol biosynthetic process	GO:1902653	0.244035	0.612547	5	145	1	80927	GSBRNA2T00130161001
GO:BP	arachidonic acid secretion	GO:0050482	0.244035	0.612547	12	145	1	80927	GSBRNA2T00115966001
GO:BP	arginine catabolic process	GO:0006527	0.244035	0.612547	9	145	1	80927	GSBRNA2T00130859001
GO:BP	icosanoid transport	GO:0071715	0.244035	0.612547	12	145	1	80927	GSBRNA2T00115966001
GO:BP	NADP biosynthetic process	GO:0006741	0.244035	0.612547	12	145	1	80927	GSBRNA2T00122385001
GO:BP	NADP metabolic process	GO:0006739	0.244035	0.612547	55	145	2	80927	GSBRNA2T00146034001,GSBRNA2T00122385001
GO:BP	metabolic process	GO:0008152	0.244035	0.612547	22188	145	53	80927	GSBRNA2T00004540001,GSBRNA2T00130859001,GSBRNA2T00130856001,GSBRNA2T00130184001,GSBRNA2T00130161001,GSBRNA2T00058096001,GSBRNA2T00132718001,GSBRNA2T00126907001,GSBRNA2T00126684001,GSBRNA2T00126929001,GSBRNA2T00000399001,GSBRNA2T00036858001,GSBRNA2T00078837001,GSBRNA2T00078802001,GSBRNA2T00086813001,GSBRNA2T00021893001,GSBRNA2T00018219001,GSBRNA2T00018266001,GSBRNA2T00018263001,GSBRNA2T00018267001…
GO:BP	cellular alcohol biosynthetic process	GO:0044108	0.244035	0.612547	5	145	1	80927	GSBRNA2T00130161001
GO:BP	ergosterol biosynthetic process	GO:0006696	0.244035	0.612547	5	145	1	80927	GSBRNA2T00130161001
GO:BP	icosanoid secretion	GO:0032309	0.244035	0.612547	12	145	1	80927	GSBRNA2T00115966001
GO:BP	cellular alcohol metabolic process	GO:0044107	0.244035	0.612547	5	145	1	80927	GSBRNA2T00130161001
GO:BP	arachidonate transport	GO:1903963	0.244035	0.612547	12	145	1	80927	GSBRNA2T00115966001
GO:BP	mitochondrial electron transport, NADH to ubiquinone	GO:0006120	0.244035	0.612547	11	145	1	80927	GSBRNA2T00130856001
GO:BP	phytosteroid biosynthetic process	GO:0016129	0.244035	0.612547	6	145	1	80927	GSBRNA2T00130161001
GO:BP	fatty acid transport	GO:0015908	0.244035	0.612547	12	145	1	80927	GSBRNA2T00115966001
GO:BP	long-chain fatty acid transport	GO:0015909	0.244035	0.612547	12	145	1	80927	GSBRNA2T00115966001
GO:BP	phytosteroid metabolic process	GO:0016128	0.244035	0.612547	6	145	1	80927	GSBRNA2T00130161001
GO:BP	secondary alcohol metabolic process	GO:1902652	0.24527	0.610355	13	145	1	80927	GSBRNA2T00130161001
GO:BP	glutamine family amino acid catabolic process	GO:0009065	0.24527	0.610355	13	145	1	80927	GSBRNA2T00130859001
GO:BP	glutathione biosynthetic process	GO:0006750	0.246309	0.608519	14	145	1	80927	GSBRNA2T00109460001
GO:BP	electron transport chain	GO:0022900	0.246309	0.608519	342	145	3	80927	GSBRNA2T00130856001,GSBRNA2T00021893001,GSBRNA2T00010065001
GO:BP	nonribosomal peptide biosynthetic process	GO:0019184	0.24719	0.60697	15	145	1	80927	GSBRNA2T00109460001
GO:BP	phototropism	GO:0009638	0.24719	0.60697	15	145	1	80927	GSBRNA2T00081614001
GO:BP	cell wall organization	GO:0071555	0.286746	0.542503	664	145	4	80927	GSBRNA2T00130184001,GSBRNA2T00009474001,GSBRNA2T00073600001,GSBRNA2T00038531001
GO:BP	external encapsulating structure organization	GO:0045229	0.286746	0.542503	668	145	4	80927	GSBRNA2T00130184001,GSBRNA2T00009474001,GSBRNA2T00073600001,GSBRNA2T00038531001
GO:BP	intermembrane lipid transfer	GO:0120009	0.314726	0.502068	21	145	1	80927	GSBRNA2T00150941001
GO:BP	response to blue light	GO:0009637	0.321373	0.492991	25	145	1	80927	GSBRNA2T00081614001
GO:BP	spermidine biosynthetic process	GO:0008295	0.321373	0.492991	29	145	1	80927	GSBRNA2T00130859001
GO:BP	monocarboxylic acid transport	GO:0015718	0.321373	0.492991	24	145	1	80927	GSBRNA2T00115966001
GO:BP	nicotinamide nucleotide metabolic process	GO:0046496	0.321373	0.492991	28	145	1	80927	GSBRNA2T00122385001
GO:BP	nicotinamide nucleotide biosynthetic process	GO:0019359	0.321373	0.492991	28	145	1	80927	GSBRNA2T00122385001
GO:BP	mitochondrial ATP synthesis coupled electron transport	GO:0042775	0.321373	0.492991	26	145	1	80927	GSBRNA2T00130856001
GO:BP	pyridine nucleotide metabolic process	GO:0019362	0.321373	0.492991	28	145	1	80927	GSBRNA2T00122385001
GO:BP	pyridine nucleotide biosynthetic process	GO:0019363	0.321373	0.492991	28	145	1	80927	GSBRNA2T00122385001
GO:BP	biological_process	GO:0008150	0.321373	0.492991	30273	145	65	80927	GSBRNA2T00081614001,GSBRNA2T00091741001,GSBRNA2T00087845001,GSBRNA2T00004540001,GSBRNA2T00130859001,GSBRNA2T00130856001,GSBRNA2T00130184001,GSBRNA2T00130161001,GSBRNA2T00010292001,GSBRNA2T00086082001,GSBRNA2T00058096001,GSBRNA2T00132718001,GSBRNA2T00126907001,GSBRNA2T00126684001,GSBRNA2T00126929001,GSBRNA2T00000399001,GSBRNA2T00036858001,GSBRNA2T00078837001,GSBRNA2T00078802001,GSBRNA2T00086813001…
GO:BP	spermidine metabolic process	GO:0008216	0.321373	0.492991	29	145	1	80927	GSBRNA2T00130859001
GO:BP	generation of precursor metabolites and energy	GO:0006091	0.321373	0.492991	755	145	4	80927	GSBRNA2T00130856001,GSBRNA2T00021893001,GSBRNA2T00010065001,GSBRNA2T00146034001
GO:BP	organic hydroxy compound metabolic process	GO:1901615	0.321373	0.492991	177	145	2	80927	GSBRNA2T00130161001,GSBRNA2T00027085001
GO:BP	cell wall organization or biogenesis	GO:0071554	0.323015	0.490777	782	145	4	80927	GSBRNA2T00130184001,GSBRNA2T00009474001,GSBRNA2T00073600001,GSBRNA2T00038531001
GO:BP	lipid transport	GO:0006869	0.323015	0.490777	206	145	2	80927	GSBRNA2T00150941001,GSBRNA2T00115966001
GO:BP	pentose-phosphate shunt	GO:0006098	0.330143	0.481298	43	145	1	80927	GSBRNA2T00146034001
GO:BP	catabolic process	GO:0009056	0.330143	0.481298	1649	145	6	80927	GSBRNA2T00004540001,GSBRNA2T00130859001,GSBRNA2T00126684001,GSBRNA2T00009474001,GSBRNA2T00096259001,GSBRNA2T00115966001
GO:BP	glucan metabolic process	GO:0044042	0.330143	0.481298	255	145	2	80927	GSBRNA2T00130184001,GSBRNA2T00073600001
GO:BP	lipid localization	GO:0010876	0.330143	0.481298	214	145	2	80927	GSBRNA2T00150941001,GSBRNA2T00115966001
GO:BP	cellular glucan metabolic process	GO:0006073	0.330143	0.481298	255	145	2	80927	GSBRNA2T00130184001,GSBRNA2T00073600001
GO:BP	alcohol biosynthetic process	GO:0046165	0.330143	0.481298	41	145	1	80927	GSBRNA2T00130161001
GO:BP	transcription by RNA polymerase III	GO:0006383	0.330143	0.481298	36	145	1	80927	GSBRNA2T00146223001
GO:BP	cellular nitrogen compound biosynthetic process	GO:0044271	0.330143	0.481298	6045	145	16	80927	GSBRNA2T00130859001,GSBRNA2T00126929001,GSBRNA2T00036858001,GSBRNA2T00078837001,GSBRNA2T00086813001,GSBRNA2T00140327001,GSBRNA2T00146197001,GSBRNA2T00146223001,GSBRNA2T00146222001,GSBRNA2T00146090001,GSBRNA2T00128889001,GSBRNA2T00122385001,GSBRNA2T00109460001,GSBRNA2T00109450001,GSBRNA2T00109485001,GSBRNA2T00109484001
GO:BP	sterol biosynthetic process	GO:0016126	0.330143	0.481298	38	145	1	80927	GSBRNA2T00130161001
GO:BP	sterol metabolic process	GO:0016125	0.330143	0.481298	42	145	1	80927	GSBRNA2T00130161001
GO:BP	respiratory electron transport chain	GO:0022904	0.330143	0.481298	45	145	1	80927	GSBRNA2T00130856001
GO:BP	hydrotropism	GO:0010274	0.330143	0.481298	36	145	1	80927	GSBRNA2T00088760001
GO:BP	ATP synthesis coupled electron transport	GO:0042773	0.330143	0.481298	36	145	1	80927	GSBRNA2T00130856001
GO:BP	NADPH regeneration	GO:0006740	0.330143	0.481298	43	145	1	80927	GSBRNA2T00146034001
GO:BP	reactive oxygen species metabolic process	GO:0072593	0.330143	0.481298	241	145	2	80927	GSBRNA2T00126684001,GSBRNA2T00146102001
GO:BP	oxidative phosphorylation	GO:0006119	0.330143	0.481298	39	145	1	80927	GSBRNA2T00130856001
GO:BP	arginine metabolic process	GO:0006525	0.330143	0.481298	37	145	1	80927	GSBRNA2T00130859001
GO:BP	pyridine-containing compound biosynthetic process	GO:0072525	0.330143	0.481298	42	145	1	80927	GSBRNA2T00122385001
GO:BP	pyridine-containing compound metabolic process	GO:0072524	0.330143	0.481298	42	145	1	80927	GSBRNA2T00122385001
GO:BP	glucose 6-phosphate metabolic process	GO:0051156	0.330143	0.481298	43	145	1	80927	GSBRNA2T00146034001
GO:BP	superoxide metabolic process	GO:0006801	0.330143	0.481298	45	145	1	80927	GSBRNA2T00146102001
GO:BP	modification-dependent protein catabolic process	GO:0019941	0.361823	0.441503	306	145	2	80927	GSBRNA2T00004540001,GSBRNA2T00096259001
GO:BP	cellular biosynthetic process	GO:0044249	0.361823	0.441503	7791	145	19	80927	GSBRNA2T00130859001,GSBRNA2T00130184001,GSBRNA2T00130161001,GSBRNA2T00126929001,GSBRNA2T00036858001,GSBRNA2T00078837001,GSBRNA2T00086813001,GSBRNA2T00088386001,GSBRNA2T00140327001,GSBRNA2T00146197001,GSBRNA2T00146223001,GSBRNA2T00146222001,GSBRNA2T00146090001,GSBRNA2T00128889001,GSBRNA2T00122385001,GSBRNA2T00109460001,GSBRNA2T00109450001,GSBRNA2T00109485001,GSBRNA2T00109484001
GO:BP	steroid biosynthetic process	GO:0006694	0.361823	0.441503	54	145	1	80927	GSBRNA2T00130161001
GO:BP	polyamine biosynthetic process	GO:0006596	0.361823	0.441503	51	145	1	80927	GSBRNA2T00130859001
GO:BP	cellular polysaccharide metabolic process	GO:0044264	0.361823	0.441503	294	145	2	80927	GSBRNA2T00130184001,GSBRNA2T00073600001
GO:BP	glutathione metabolic process	GO:0006749	0.361823	0.441503	54	145	1	80927	GSBRNA2T00109460001
GO:BP	polyamine metabolic process	GO:0006595	0.361823	0.441503	52	145	1	80927	GSBRNA2T00130859001
GO:BP	modification-dependent macromolecule catabolic process	GO:0043632	0.361823	0.441503	307	145	2	80927	GSBRNA2T00004540001,GSBRNA2T00096259001
GO:BP	cellular modified amino acid biosynthetic process	GO:0042398	0.361823	0.441503	55	145	1	80927	GSBRNA2T00109460001
GO:BP	alpha-amino acid catabolic process	GO:1901606	0.361823	0.441503	61	145	1	80927	GSBRNA2T00130859001
GO:BP	carbohydrate metabolic process	GO:0005975	0.361823	0.441503	2155	145	7	80927	GSBRNA2T00130184001,GSBRNA2T00009474001,GSBRNA2T00009601001,GSBRNA2T00055421001,GSBRNA2T00073600001,GSBRNA2T00095843001,GSBRNA2T00146034001
GO:BP	organic substance catabolic process	GO:1901575	0.361823	0.441503	1390	145	5	80927	GSBRNA2T00004540001,GSBRNA2T00130859001,GSBRNA2T00009474001,GSBRNA2T00096259001,GSBRNA2T00115966001
GO:BP	steroid metabolic process	GO:0008202	0.361823	0.441503	59	145	1	80927	GSBRNA2T00130161001
GO:BP	ubiquitin-dependent protein catabolic process	GO:0006511	0.361823	0.441503	306	145	2	80927	GSBRNA2T00004540001,GSBRNA2T00096259001
GO:BP	organonitrogen compound catabolic process	GO:1901565	0.361823	0.441503	612	145	3	80927	GSBRNA2T00004540001,GSBRNA2T00130859001,GSBRNA2T00096259001
GO:BP	fucose metabolic process	GO:0006004	0.361823	0.441503	58	145	1	80927	GSBRNA2T00095843001
GO:BP	response to external stimulus	GO:0009605	0.361823	0.441503	289	145	2	80927	GSBRNA2T00081614001,GSBRNA2T00088760001
GO:BP	polysaccharide metabolic process	GO:0005976	0.364201	0.438658	638	145	3	80927	GSBRNA2T00130184001,GSBRNA2T00009474001,GSBRNA2T00073600001
GO:BP	cellulose biosynthetic process	GO:0030244	0.364457	0.438353	65	145	1	80927	GSBRNA2T00130184001
GO:BP	cellular amino acid catabolic process	GO:0009063	0.364457	0.438353	65	145	1	80927	GSBRNA2T00130859001
GO:BP	transcription, DNA-templated	GO:0006351	0.383696	0.416013	3691	145	10	80927	GSBRNA2T00126929001,GSBRNA2T00036858001,GSBRNA2T00078837001,GSBRNA2T00086813001,GSBRNA2T00140327001,GSBRNA2T00146197001,GSBRNA2T00146223001,GSBRNA2T00146222001,GSBRNA2T00128889001,GSBRNA2T00109484001
GO:BP	organic cyclic compound biosynthetic process	GO:1901362	0.383696	0.416013	4570	145	12	80927	GSBRNA2T00130161001,GSBRNA2T00126929001,GSBRNA2T00036858001,GSBRNA2T00078837001,GSBRNA2T00086813001,GSBRNA2T00140327001,GSBRNA2T00146197001,GSBRNA2T00146223001,GSBRNA2T00146222001,GSBRNA2T00128889001,GSBRNA2T00122385001,GSBRNA2T00109484001
GO:BP	xyloglucan metabolic process	GO:0010411	0.383696	0.416013	76	145	1	80927	GSBRNA2T00073600001
GO:BP	cellular macromolecule biosynthetic process	GO:0034645	0.383696	0.416013	6037	145	15	80927	GSBRNA2T00130184001,GSBRNA2T00126929001,GSBRNA2T00036858001,GSBRNA2T00078837001,GSBRNA2T00086813001,GSBRNA2T00088386001,GSBRNA2T00140327001,GSBRNA2T00146197001,GSBRNA2T00146223001,GSBRNA2T00146222001,GSBRNA2T00146090001,GSBRNA2T00128889001,GSBRNA2T00109450001,GSBRNA2T00109485001,GSBRNA2T00109484001
GO:BP	organic acid transport	GO:0015849	0.383696	0.416013	76	145	1	80927	GSBRNA2T00115966001
GO:BP	cellular catabolic process	GO:0044248	0.383696	0.416013	1055	145	4	80927	GSBRNA2T00004540001,GSBRNA2T00130859001,GSBRNA2T00126684001,GSBRNA2T00096259001
GO:BP	carboxylic acid transport	GO:0046942	0.383696	0.416013	76	145	1	80927	GSBRNA2T00115966001
GO:BP	organic substance biosynthetic process	GO:1901576	0.383696	0.416013	7960	145	19	80927	GSBRNA2T00130859001,GSBRNA2T00130184001,GSBRNA2T00130161001,GSBRNA2T00126929001,GSBRNA2T00036858001,GSBRNA2T00078837001,GSBRNA2T00086813001,GSBRNA2T00088386001,GSBRNA2T00140327001,GSBRNA2T00146197001,GSBRNA2T00146223001,GSBRNA2T00146222001,GSBRNA2T00146090001,GSBRNA2T00128889001,GSBRNA2T00122385001,GSBRNA2T00109460001,GSBRNA2T00109450001,GSBRNA2T00109485001,GSBRNA2T00109484001
GO:BP	nucleobase-containing compound biosynthetic process	GO:0034654	0.383696	0.416013	4144	145	11	80927	GSBRNA2T00126929001,GSBRNA2T00036858001,GSBRNA2T00078837001,GSBRNA2T00086813001,GSBRNA2T00140327001,GSBRNA2T00146197001,GSBRNA2T00146223001,GSBRNA2T00146222001,GSBRNA2T00128889001,GSBRNA2T00122385001,GSBRNA2T00109484001
GO:BP	RNA biosynthetic process	GO:0032774	0.386155	0.413239	3729	145	10	80927	GSBRNA2T00126929001,GSBRNA2T00036858001,GSBRNA2T00078837001,GSBRNA2T00086813001,GSBRNA2T00140327001,GSBRNA2T00146197001,GSBRNA2T00146223001,GSBRNA2T00146222001,GSBRNA2T00128889001,GSBRNA2T00109484001
GO:BP	proteolysis involved in cellular protein catabolic process	GO:0051603	0.386155	0.413239	351	145	2	80927	GSBRNA2T00004540001,GSBRNA2T00096259001
GO:BP	cellular protein catabolic process	GO:0044257	0.386155	0.413239	351	145	2	80927	GSBRNA2T00004540001,GSBRNA2T00096259001
GO:BP	nucleic acid-templated transcription	GO:0097659	0.386155	0.413239	3723	145	10	80927	GSBRNA2T00126929001,GSBRNA2T00036858001,GSBRNA2T00078837001,GSBRNA2T00086813001,GSBRNA2T00140327001,GSBRNA2T00146197001,GSBRNA2T00146223001,GSBRNA2T00146222001,GSBRNA2T00128889001,GSBRNA2T00109484001
GO:BP	macromolecule biosynthetic process	GO:0009059	0.389279	0.409739	6130	145	15	80927	GSBRNA2T00130184001,GSBRNA2T00126929001,GSBRNA2T00036858001,GSBRNA2T00078837001,GSBRNA2T00086813001,GSBRNA2T00088386001,GSBRNA2T00140327001,GSBRNA2T00146197001,GSBRNA2T00146223001,GSBRNA2T00146222001,GSBRNA2T00146090001,GSBRNA2T00128889001,GSBRNA2T00109450001,GSBRNA2T00109485001,GSBRNA2T00109484001
GO:BP	regulation of nucleobase-containing compound metabolic process	GO:0019219	0.389719	0.409248	3398	145	9	80927	GSBRNA2T00126929001,GSBRNA2T00036858001,GSBRNA2T00078837001,GSBRNA2T00086813001,GSBRNA2T00140327001,GSBRNA2T00146197001,GSBRNA2T00146222001,GSBRNA2T00128889001,GSBRNA2T00109484001
GO:BP	regulation of RNA biosynthetic process	GO:2001141	0.389719	0.409248	3361	145	9	80927	GSBRNA2T00126929001,GSBRNA2T00036858001,GSBRNA2T00078837001,GSBRNA2T00086813001,GSBRNA2T00140327001,GSBRNA2T00146197001,GSBRNA2T00146222001,GSBRNA2T00128889001,GSBRNA2T00109484001
GO:BP	lipid catabolic process	GO:0016042	0.389719	0.409248	86	145	1	80927	GSBRNA2T00115966001
GO:BP	chromatin assembly	GO:0031497	0.389719	0.409248	90	145	1	80927	GSBRNA2T00091741001
GO:BP	organic acid catabolic process	GO:0016054	0.389719	0.409248	86	145	1	80927	GSBRNA2T00130859001
GO:BP	chromatin assembly or disassembly	GO:0006333	0.389719	0.409248	94	145	1	80927	GSBRNA2T00091741001
GO:BP	nucleosome organization	GO:0034728	0.389719	0.409248	93	145	1	80927	GSBRNA2T00091741001
GO:BP	beta-glucan biosynthetic process	GO:0051274	0.389719	0.409248	96	145	1	80927	GSBRNA2T00130184001
GO:BP	regulation of RNA metabolic process	GO:0051252	0.389719	0.409248	3385	145	9	80927	GSBRNA2T00126929001,GSBRNA2T00036858001,GSBRNA2T00078837001,GSBRNA2T00086813001,GSBRNA2T00140327001,GSBRNA2T00146197001,GSBRNA2T00146222001,GSBRNA2T00128889001,GSBRNA2T00109484001
GO:BP	biosynthetic process	GO:0009058	0.389719	0.409248	8269	145	19	80927	GSBRNA2T00130859001,GSBRNA2T00130184001,GSBRNA2T00130161001,GSBRNA2T00126929001,GSBRNA2T00036858001,GSBRNA2T00078837001,GSBRNA2T00086813001,GSBRNA2T00088386001,GSBRNA2T00140327001,GSBRNA2T00146197001,GSBRNA2T00146223001,GSBRNA2T00146222001,GSBRNA2T00146090001,GSBRNA2T00128889001,GSBRNA2T00122385001,GSBRNA2T00109460001,GSBRNA2T00109450001,GSBRNA2T00109485001,GSBRNA2T00109484001
GO:BP	carboxylic acid catabolic process	GO:0046395	0.389719	0.409248	86	145	1	80927	GSBRNA2T00130859001
GO:BP	amine biosynthetic process	GO:0009309	0.389719	0.409248	94	145	1	80927	GSBRNA2T00130859001
GO:BP	regulation of transcription, DNA-templated	GO:0006355	0.389719	0.409248	3339	145	9	80927	GSBRNA2T00126929001,GSBRNA2T00036858001,GSBRNA2T00078837001,GSBRNA2T00086813001,GSBRNA2T00140327001,GSBRNA2T00146197001,GSBRNA2T00146222001,GSBRNA2T00128889001,GSBRNA2T00109484001
GO:BP	nucleosome assembly	GO:0006334	0.389719	0.409248	89	145	1	80927	GSBRNA2T00091741001
GO:BP	regulation of nucleic acid-templated transcription	GO:1903506	0.389719	0.409248	3361	145	9	80927	GSBRNA2T00126929001,GSBRNA2T00036858001,GSBRNA2T00078837001,GSBRNA2T00086813001,GSBRNA2T00140327001,GSBRNA2T00146197001,GSBRNA2T00146222001,GSBRNA2T00128889001,GSBRNA2T00109484001
GO:BP	organic hydroxy compound biosynthetic process	GO:1901617	0.389719	0.409248	91	145	1	80927	GSBRNA2T00130161001
GO:BP	cellular biogenic amine biosynthetic process	GO:0042401	0.389719	0.409248	94	145	1	80927	GSBRNA2T00130859001
GO:BP	response to stimulus	GO:0050896	0.399063	0.398958	2968	145	8	80927	GSBRNA2T00081614001,GSBRNA2T00010292001,GSBRNA2T00126684001,GSBRNA2T00086813001,GSBRNA2T00088760001,GSBRNA2T00010066001,GSBRNA2T00146028001,GSBRNA2T00146153001
GO:BP	regulation of cellular macromolecule biosynthetic process	GO:2000112	0.399063	0.398958	3432	145	9	80927	GSBRNA2T00126929001,GSBRNA2T00036858001,GSBRNA2T00078837001,GSBRNA2T00086813001,GSBRNA2T00140327001,GSBRNA2T00146197001,GSBRNA2T00146222001,GSBRNA2T00128889001,GSBRNA2T00109484001
GO:BP	regulation of cellular biosynthetic process	GO:0031326	0.400883	0.396982	3470	145	9	80927	GSBRNA2T00126929001,GSBRNA2T00036858001,GSBRNA2T00078837001,GSBRNA2T00086813001,GSBRNA2T00140327001,GSBRNA2T00146197001,GSBRNA2T00146222001,GSBRNA2T00128889001,GSBRNA2T00109484001
GO:BP	aromatic compound biosynthetic process	GO:0019438	0.400883	0.396982	4431	145	11	80927	GSBRNA2T00126929001,GSBRNA2T00036858001,GSBRNA2T00078837001,GSBRNA2T00086813001,GSBRNA2T00140327001,GSBRNA2T00146197001,GSBRNA2T00146223001,GSBRNA2T00146222001,GSBRNA2T00128889001,GSBRNA2T00122385001,GSBRNA2T00109484001
GO:BP	regulation of biosynthetic process	GO:0009889	0.400883	0.396982	3470	145	9	80927	GSBRNA2T00126929001,GSBRNA2T00036858001,GSBRNA2T00078837001,GSBRNA2T00086813001,GSBRNA2T00140327001,GSBRNA2T00146197001,GSBRNA2T00146222001,GSBRNA2T00128889001,GSBRNA2T00109484001
GO:BP	regulation of macromolecule biosynthetic process	GO:0010556	0.400883	0.396982	3454	145	9	80927	GSBRNA2T00126929001,GSBRNA2T00036858001,GSBRNA2T00078837001,GSBRNA2T00086813001,GSBRNA2T00140327001,GSBRNA2T00146197001,GSBRNA2T00146222001,GSBRNA2T00128889001,GSBRNA2T00109484001
GO:BP	DNA packaging	GO:0006323	0.400883	0.396982	104	145	1	80927	GSBRNA2T00091741001
GO:BP	protein catabolic process	GO:0030163	0.401657	0.396145	422	145	2	80927	GSBRNA2T00004540001,GSBRNA2T00096259001
GO:BP	alcohol metabolic process	GO:0006066	0.401657	0.396145	107	145	1	80927	GSBRNA2T00130161001
GO:BP	heterocycle biosynthetic process	GO:0018130	0.402995	0.3947	4459	145	11	80927	GSBRNA2T00126929001,GSBRNA2T00036858001,GSBRNA2T00078837001,GSBRNA2T00086813001,GSBRNA2T00140327001,GSBRNA2T00146197001,GSBRNA2T00146223001,GSBRNA2T00146222001,GSBRNA2T00128889001,GSBRNA2T00122385001,GSBRNA2T00109484001
GO:BP	response to auxin	GO:0009733	0.405487	0.392023	431	145	2	80927	GSBRNA2T00010292001,GSBRNA2T00086813001
GO:BP	cellulose metabolic process	GO:0030243	0.405487	0.392023	111	145	1	80927	GSBRNA2T00130184001
GO:BP	cell wall polysaccharide metabolic process	GO:0010383	0.405833	0.391653	115	145	1	80927	GSBRNA2T00073600001
GO:BP	glucan biosynthetic process	GO:0009250	0.405833	0.391653	116	145	1	80927	GSBRNA2T00130184001
GO:BP	hemicellulose metabolic process	GO:0010410	0.405833	0.391653	114	145	1	80927	GSBRNA2T00073600001
GO:BP	cellular biogenic amine metabolic process	GO:0006576	0.405833	0.391653	116	145	1	80927	GSBRNA2T00130859001
GO:BP	cellular amine metabolic process	GO:0044106	0.405833	0.391653	116	145	1	80927	GSBRNA2T00130859001
GO:BP	protein deubiquitination	GO:0016579	0.40642	0.391025	119	145	1	80927	GSBRNA2T00096259001
GO:BP	proteolysis	GO:0006508	0.40642	0.391025	1704	145	5	80927	GSBRNA2T00004540001,GSBRNA2T00000399001,GSBRNA2T00146042001,GSBRNA2T00096259001,GSBRNA2T00109462001
GO:BP	signal transduction	GO:0007165	0.40642	0.391025	1262	145	4	80927	GSBRNA2T00086813001,GSBRNA2T00010066001,GSBRNA2T00146028001,GSBRNA2T00146153001
GO:BP	signaling	GO:0023052	0.412529	0.384546	1276	145	4	80927	GSBRNA2T00086813001,GSBRNA2T00010066001,GSBRNA2T00146028001,GSBRNA2T00146153001
GO:BP	cellular modified amino acid metabolic process	GO:0006575	0.424748	0.371869	127	145	1	80927	GSBRNA2T00109460001
GO:BP	regulation of gene expression	GO:0010468	0.425892	0.3707	3654	145	9	80927	GSBRNA2T00126929001,GSBRNA2T00036858001,GSBRNA2T00078837001,GSBRNA2T00086813001,GSBRNA2T00140327001,GSBRNA2T00146197001,GSBRNA2T00146222001,GSBRNA2T00128889001,GSBRNA2T00109484001
GO:BP	protein modification by small protein removal	GO:0070646	0.425892	0.3707	131	145	1	80927	GSBRNA2T00096259001
GO:BP	protein-DNA complex assembly	GO:0065004	0.425892	0.3707	130	145	1	80927	GSBRNA2T00091741001
GO:BP	protein-DNA complex subunit organization	GO:0071824	0.425892	0.3707	134	145	1	80927	GSBRNA2T00091741001
GO:BP	regulation of nitrogen compound metabolic process	GO:0051171	0.425892	0.3707	3675	145	9	80927	GSBRNA2T00126929001,GSBRNA2T00036858001,GSBRNA2T00078837001,GSBRNA2T00086813001,GSBRNA2T00140327001,GSBRNA2T00146197001,GSBRNA2T00146222001,GSBRNA2T00128889001,GSBRNA2T00109484001
GO:BP	lipid metabolic process	GO:0006629	0.425892	0.3707	1321	145	4	80927	GSBRNA2T00130161001,GSBRNA2T00132718001,GSBRNA2T00062114001,GSBRNA2T00115966001
GO:BP	cellular carbohydrate metabolic process	GO:0044262	0.425892	0.3707	482	145	2	80927	GSBRNA2T00130184001,GSBRNA2T00073600001
GO:BP	response to light stimulus	GO:0009416	0.42661	0.369969	146	145	1	80927	GSBRNA2T00081614001
GO:BP	response to radiation	GO:0009314	0.42661	0.369969	148	145	1	80927	GSBRNA2T00081614001
GO:BP	cellular macromolecule catabolic process	GO:0044265	0.42661	0.369969	507	145	2	80927	GSBRNA2T00004540001,GSBRNA2T00096259001
GO:BP	phosphorelay signal transduction system	GO:0000160	0.42661	0.369969	146	145	1	80927	GSBRNA2T00146028001
GO:BP	glutamine family amino acid metabolic process	GO:0009064	0.42661	0.369969	147	145	1	80927	GSBRNA2T00130859001
GO:BP	macromolecule catabolic process	GO:0009057	0.42661	0.369969	908	145	3	80927	GSBRNA2T00004540001,GSBRNA2T00009474001,GSBRNA2T00096259001
GO:BP	response to hormone	GO:0009725	0.42661	0.369969	510	145	2	80927	GSBRNA2T00010292001,GSBRNA2T00086813001
GO:BP	regulation of primary metabolic process	GO:0080090	0.42661	0.369969	3691	145	9	80927	GSBRNA2T00126929001,GSBRNA2T00036858001,GSBRNA2T00078837001,GSBRNA2T00086813001,GSBRNA2T00140327001,GSBRNA2T00146197001,GSBRNA2T00146222001,GSBRNA2T00128889001,GSBRNA2T00109484001
GO:BP	beta-glucan metabolic process	GO:0051273	0.42661	0.369969	142	145	1	80927	GSBRNA2T00130184001
GO:BP	small molecule catabolic process	GO:0044282	0.42661	0.369969	148	145	1	80927	GSBRNA2T00130859001
GO:BP	secretion	GO:0046903	0.42661	0.369969	146	145	1	80927	GSBRNA2T00115966001
GO:BP	response to endogenous stimulus	GO:0009719	0.42661	0.369969	511	145	2	80927	GSBRNA2T00010292001,GSBRNA2T00086813001
GO:BP	regulation of cellular metabolic process	GO:0031323	0.42661	0.369969	3760	145	9	80927	GSBRNA2T00126929001,GSBRNA2T00036858001,GSBRNA2T00078837001,GSBRNA2T00086813001,GSBRNA2T00140327001,GSBRNA2T00146197001,GSBRNA2T00146222001,GSBRNA2T00128889001,GSBRNA2T00109484001
GO:BP	cellular respiration	GO:0045333	0.428793	0.367752	150	145	1	80927	GSBRNA2T00130856001
GO:BP	DNA-templated transcription, initiation	GO:0006352	0.428793	0.367752	151	145	1	80927	GSBRNA2T00146223001
GO:BP	cellular polysaccharide biosynthetic process	GO:0033692	0.433569	0.362942	154	145	1	80927	GSBRNA2T00130184001
GO:BP	small molecule metabolic process	GO:0044281	0.445753	0.350906	2361	145	6	80927	GSBRNA2T00130859001,GSBRNA2T00130161001,GSBRNA2T00027085001,GSBRNA2T00095843001,GSBRNA2T00122385001,GSBRNA2T00109450001
GO:BP	cellular metabolic process	GO:0044237	0.445957	0.350707	16367	145	33	80927	GSBRNA2T00004540001,GSBRNA2T00130859001,GSBRNA2T00130856001,GSBRNA2T00130184001,GSBRNA2T00130161001,GSBRNA2T00058096001,GSBRNA2T00126684001,GSBRNA2T00126929001,GSBRNA2T00036858001,GSBRNA2T00078837001,GSBRNA2T00086813001,GSBRNA2T00021893001,GSBRNA2T00010065001,GSBRNA2T00134859001,GSBRNA2T00088386001,GSBRNA2T00073600001,GSBRNA2T00140327001,GSBRNA2T00047532001,GSBRNA2T00027085001,GSBRNA2T00146197001…
GO:BP	response to organic substance	GO:0010033	0.445957	0.350707	541	145	2	80927	GSBRNA2T00010292001,GSBRNA2T00086813001
GO:BP	regulation of cellular process	GO:0050794	0.44606	0.350606	5382	145	12	80927	GSBRNA2T00126929001,GSBRNA2T00036858001,GSBRNA2T00078837001,GSBRNA2T00086813001,GSBRNA2T00010066001,GSBRNA2T00140327001,GSBRNA2T00146197001,GSBRNA2T00146028001,GSBRNA2T00146222001,GSBRNA2T00146153001,GSBRNA2T00128889001,GSBRNA2T00109484001
GO:BP	cell wall macromolecule metabolic process	GO:0044036	0.44606	0.350606	166	145	1	80927	GSBRNA2T00073600001
GO:BP	organic substance metabolic process	GO:0071704	0.44606	0.350606	18575	145	37	80927	GSBRNA2T00004540001,GSBRNA2T00130859001,GSBRNA2T00130184001,GSBRNA2T00130161001,GSBRNA2T00058096001,GSBRNA2T00132718001,GSBRNA2T00126929001,GSBRNA2T00000399001,GSBRNA2T00036858001,GSBRNA2T00078837001,GSBRNA2T00086813001,GSBRNA2T00009474001,GSBRNA2T00009601001,GSBRNA2T00062114001,GSBRNA2T00055421001,GSBRNA2T00134859001,GSBRNA2T00088386001,GSBRNA2T00073600001,GSBRNA2T00140327001,GSBRNA2T00047532001…
GO:BP	organic anion transport	GO:0015711	0.44606	0.350606	165	145	1	80927	GSBRNA2T00115966001
GO:BP	sulfur compound biosynthetic process	GO:0044272	0.448351	0.348382	171	145	1	80927	GSBRNA2T00109460001
GO:BP	cellular component organization	GO:0016043	0.448351	0.348382	2411	145	6	80927	GSBRNA2T00091741001,GSBRNA2T00130184001,GSBRNA2T00009474001,GSBRNA2T00073600001,GSBRNA2T00038531001,GSBRNA2T00150941001
GO:BP	energy derivation by oxidation of organic compounds	GO:0015980	0.448351	0.348382	170	145	1	80927	GSBRNA2T00130856001
GO:BP	amine metabolic process	GO:0009308	0.449488	0.347282	173	145	1	80927	GSBRNA2T00130859001
GO:BP	auxin-activated signaling pathway	GO:0009734	0.449858	0.346925	185	145	1	80927	GSBRNA2T00086813001
GO:BP	primary metabolic process	GO:0044238	0.449858	0.346925	17680	145	35	80927	GSBRNA2T00004540001,GSBRNA2T00130859001,GSBRNA2T00130184001,GSBRNA2T00130161001,GSBRNA2T00058096001,GSBRNA2T00132718001,GSBRNA2T00126929001,GSBRNA2T00000399001,GSBRNA2T00036858001,GSBRNA2T00078837001,GSBRNA2T00086813001,GSBRNA2T00009474001,GSBRNA2T00009601001,GSBRNA2T00062114001,GSBRNA2T00055421001,GSBRNA2T00134859001,GSBRNA2T00088386001,GSBRNA2T00073600001,GSBRNA2T00140327001,GSBRNA2T00047532001…
GO:BP	cell communication	GO:0007154	0.449858	0.346925	1476	145	4	80927	GSBRNA2T00086813001,GSBRNA2T00010066001,GSBRNA2T00146028001,GSBRNA2T00146153001
GO:BP	tRNA aminoacylation for protein translation	GO:0006418	0.449858	0.346925	188	145	1	80927	GSBRNA2T00109450001
GO:BP	hexose metabolic process	GO:0019318	0.449858	0.346925	187	145	1	80927	GSBRNA2T00095843001
GO:BP	amino acid activation	GO:0043038	0.449858	0.346925	193	145	1	80927	GSBRNA2T00109450001
GO:BP	organonitrogen compound biosynthetic process	GO:1901566	0.449858	0.346925	2986	145	7	80927	GSBRNA2T00130859001,GSBRNA2T00088386001,GSBRNA2T00146090001,GSBRNA2T00122385001,GSBRNA2T00109460001,GSBRNA2T00109450001,GSBRNA2T00109485001
GO:BP	hydrogen peroxide catabolic process	GO:0042744	0.449858	0.346925	193	145	1	80927	GSBRNA2T00126684001
GO:BP	hydrogen peroxide metabolic process	GO:0042743	0.449858	0.346925	193	145	1	80927	GSBRNA2T00126684001
GO:BP	cell wall biogenesis	GO:0042546	0.449858	0.346925	177	145	1	80927	GSBRNA2T00073600001
GO:BP	cell wall modification	GO:0042545	0.449858	0.346925	177	145	1	80927	GSBRNA2T00009474001
GO:BP	regulation of macromolecule metabolic process	GO:0060255	0.449858	0.346925	3989	145	9	80927	GSBRNA2T00126929001,GSBRNA2T00036858001,GSBRNA2T00078837001,GSBRNA2T00086813001,GSBRNA2T00140327001,GSBRNA2T00146197001,GSBRNA2T00146222001,GSBRNA2T00128889001,GSBRNA2T00109484001
GO:BP	organophosphate metabolic process	GO:0019637	0.449858	0.346925	1027	145	3	80927	GSBRNA2T00146034001,GSBRNA2T00122385001,GSBRNA2T00115966001
GO:BP	membrane organization	GO:0061024	0.449858	0.346925	180	145	1	80927	GSBRNA2T00150941001
GO:BP	cellular response to auxin stimulus	GO:0071365	0.449858	0.346925	185	145	1	80927	GSBRNA2T00086813001
GO:BP	protein modification by small protein conjugation or removal	GO:0070647	0.449858	0.346925	583	145	2	80927	GSBRNA2T00134859001,GSBRNA2T00096259001
GO:BP	tRNA aminoacylation	GO:0043039	0.449858	0.346925	193	145	1	80927	GSBRNA2T00109450001
GO:BP	RNA metabolic process	GO:0016070	0.452172	0.344696	5050	145	11	80927	GSBRNA2T00126929001,GSBRNA2T00036858001,GSBRNA2T00078837001,GSBRNA2T00086813001,GSBRNA2T00140327001,GSBRNA2T00146197001,GSBRNA2T00146223001,GSBRNA2T00146222001,GSBRNA2T00128889001,GSBRNA2T00109450001,GSBRNA2T00109484001
GO:BP	regulation of metabolic process	GO:0019222	0.453836	0.343101	4035	145	9	80927	GSBRNA2T00126929001,GSBRNA2T00036858001,GSBRNA2T00078837001,GSBRNA2T00086813001,GSBRNA2T00140327001,GSBRNA2T00146197001,GSBRNA2T00146222001,GSBRNA2T00128889001,GSBRNA2T00109484001
GO:BP	monosaccharide metabolic process	GO:0005996	0.458281	0.338868	201	145	1	80927	GSBRNA2T00095843001
GO:BP	DNA conformation change	GO:0071103	0.478358	0.320247	213	145	1	80927	GSBRNA2T00091741001
GO:BP	polysaccharide biosynthetic process	GO:0000271	0.48145	0.317449	216	145	1	80927	GSBRNA2T00130184001
GO:BP	peptide biosynthetic process	GO:0043043	0.487326	0.31218	1611	145	4	80927	GSBRNA2T00146090001,GSBRNA2T00109460001,GSBRNA2T00109450001,GSBRNA2T00109485001
GO:BP	cellular carbohydrate biosynthetic process	GO:0034637	0.494587	0.305757	226	145	1	80927	GSBRNA2T00130184001
GO:BP	hormone-mediated signaling pathway	GO:0009755	0.499492	0.301472	232	145	1	80927	GSBRNA2T00086813001
GO:BP	cellular response to hormone stimulus	GO:0032870	0.499492	0.301472	232	145	1	80927	GSBRNA2T00086813001
GO:BP	cellular response to endogenous stimulus	GO:0071495	0.499492	0.301472	233	145	1	80927	GSBRNA2T00086813001
GO:BP	regulation of biological process	GO:0050789	0.504176	0.297417	5805	145	12	80927	GSBRNA2T00126929001,GSBRNA2T00036858001,GSBRNA2T00078837001,GSBRNA2T00086813001,GSBRNA2T00010066001,GSBRNA2T00140327001,GSBRNA2T00146197001,GSBRNA2T00146028001,GSBRNA2T00146222001,GSBRNA2T00146153001,GSBRNA2T00128889001,GSBRNA2T00109484001
GO:BP	peptide metabolic process	GO:0006518	0.512031	0.290703	1690	145	4	80927	GSBRNA2T00146090001,GSBRNA2T00109460001,GSBRNA2T00109450001,GSBRNA2T00109485001
GO:BP	amide biosynthetic process	GO:0043604	0.512031	0.290703	1690	145	4	80927	GSBRNA2T00146090001,GSBRNA2T00109460001,GSBRNA2T00109450001,GSBRNA2T00109485001
GO:BP	cellular component organization or biogenesis	GO:0071840	0.512031	0.290703	2701	145	6	80927	GSBRNA2T00091741001,GSBRNA2T00130184001,GSBRNA2T00009474001,GSBRNA2T00073600001,GSBRNA2T00038531001,GSBRNA2T00150941001
GO:BP	cellular response to organic substance	GO:0071310	0.512031	0.290703	246	145	1	80927	GSBRNA2T00086813001
GO:BP	pectin catabolic process	GO:0045490	0.521453	0.282785	255	145	1	80927	GSBRNA2T00009474001
GO:BP	gene expression	GO:0010467	0.534456	0.272088	6484	145	13	80927	GSBRNA2T00126929001,GSBRNA2T00036858001,GSBRNA2T00078837001,GSBRNA2T00086813001,GSBRNA2T00140327001,GSBRNA2T00146197001,GSBRNA2T00146223001,GSBRNA2T00146222001,GSBRNA2T00146090001,GSBRNA2T00128889001,GSBRNA2T00109450001,GSBRNA2T00109485001,GSBRNA2T00109484001
GO:BP	cellular nitrogen compound metabolic process	GO:0034641	0.549675	0.259894	8161	145	16	80927	GSBRNA2T00130859001,GSBRNA2T00126929001,GSBRNA2T00036858001,GSBRNA2T00078837001,GSBRNA2T00086813001,GSBRNA2T00140327001,GSBRNA2T00146197001,GSBRNA2T00146223001,GSBRNA2T00146222001,GSBRNA2T00146090001,GSBRNA2T00128889001,GSBRNA2T00122385001,GSBRNA2T00109460001,GSBRNA2T00109450001,GSBRNA2T00109485001,GSBRNA2T00109484001
GO:BP	chromatin organization	GO:0006325	0.557993	0.253372	284	145	1	80927	GSBRNA2T00091741001
GO:BP	response to abiotic stimulus	GO:0009628	0.557993	0.253372	285	145	1	80927	GSBRNA2T00081614001
GO:BP	glycoprotein biosynthetic process	GO:0009101	0.564397	0.248415	297	145	1	80927	GSBRNA2T00088386001
GO:BP	protein glycosylation	GO:0006486	0.564397	0.248415	297	145	1	80927	GSBRNA2T00088386001
GO:BP	macromolecule glycosylation	GO:0043413	0.564397	0.248415	297	145	1	80927	GSBRNA2T00088386001
GO:BP	glycoprotein metabolic process	GO:0009100	0.564397	0.248415	300	145	1	80927	GSBRNA2T00088386001
GO:BP	nucleic acid metabolic process	GO:0090304	0.564397	0.248415	5577	145	11	80927	GSBRNA2T00126929001,GSBRNA2T00036858001,GSBRNA2T00078837001,GSBRNA2T00086813001,GSBRNA2T00140327001,GSBRNA2T00146197001,GSBRNA2T00146223001,GSBRNA2T00146222001,GSBRNA2T00128889001,GSBRNA2T00109450001,GSBRNA2T00109484001
GO:BP	ATP metabolic process	GO:0046034	0.564397	0.248415	296	145	1	80927	GSBRNA2T00130856001
GO:BP	response to oxidative stress	GO:0006979	0.564892	0.248035	326	145	1	80927	GSBRNA2T00126684001
GO:BP	sulfur compound metabolic process	GO:0006790	0.564892	0.248035	315	145	1	80927	GSBRNA2T00109460001
GO:BP	nucleotide biosynthetic process	GO:0009165	0.564892	0.248035	323	145	1	80927	GSBRNA2T00122385001
GO:BP	glycosylation	GO:0070085	0.564892	0.248035	326	145	1	80927	GSBRNA2T00088386001
GO:BP	nucleoside phosphate biosynthetic process	GO:1901293	0.564892	0.248035	326	145	1	80927	GSBRNA2T00122385001
GO:BP	cellular lipid metabolic process	GO:0044255	0.564892	0.248035	833	145	2	80927	GSBRNA2T00130161001,GSBRNA2T00115966001
GO:BP	proton transmembrane transport	GO:1902600	0.564892	0.248035	307	145	1	80927	GSBRNA2T00087845001
GO:BP	cellular amide metabolic process	GO:0043603	0.564892	0.248035	1848	145	4	80927	GSBRNA2T00146090001,GSBRNA2T00109460001,GSBRNA2T00109450001,GSBRNA2T00109485001
GO:BP	pectin metabolic process	GO:0045488	0.564892	0.248035	315	145	1	80927	GSBRNA2T00009474001
GO:BP	response to chemical	GO:0042221	0.564892	0.248035	811	145	2	80927	GSBRNA2T00010292001,GSBRNA2T00086813001
GO:BP	galacturonan metabolic process	GO:0010393	0.564892	0.248035	315	145	1	80927	GSBRNA2T00009474001
GO:BP	organic cyclic compound metabolic process	GO:1901360	0.564892	0.248035	6789	145	13	80927	GSBRNA2T00130161001,GSBRNA2T00126929001,GSBRNA2T00036858001,GSBRNA2T00078837001,GSBRNA2T00086813001,GSBRNA2T00140327001,GSBRNA2T00146197001,GSBRNA2T00146223001,GSBRNA2T00146222001,GSBRNA2T00128889001,GSBRNA2T00122385001,GSBRNA2T00109450001,GSBRNA2T00109484001
GO:BP	cellular process	GO:0009987	0.564892	0.248035	23307	145	43	80927	GSBRNA2T00091741001,GSBRNA2T00087845001,GSBRNA2T00004540001,GSBRNA2T00130859001,GSBRNA2T00130856001,GSBRNA2T00130184001,GSBRNA2T00130161001,GSBRNA2T00086082001,GSBRNA2T00058096001,GSBRNA2T00126684001,GSBRNA2T00126929001,GSBRNA2T00036858001,GSBRNA2T00078837001,GSBRNA2T00086813001,GSBRNA2T00021893001,GSBRNA2T00005582001,GSBRNA2T00009474001,GSBRNA2T00010065001,GSBRNA2T00010066001,GSBRNA2T00134859001…
GO:BP	carbohydrate biosynthetic process	GO:0016051	0.564892	0.248035	321	145	1	80927	GSBRNA2T00130184001
GO:BP	polysaccharide catabolic process	GO:0000272	0.564976	0.24797	332	145	1	80927	GSBRNA2T00009474001
GO:BP	nucleobase-containing compound metabolic process	GO:0006139	0.564976	0.24797	6262	145	12	80927	GSBRNA2T00126929001,GSBRNA2T00036858001,GSBRNA2T00078837001,GSBRNA2T00086813001,GSBRNA2T00140327001,GSBRNA2T00146197001,GSBRNA2T00146223001,GSBRNA2T00146222001,GSBRNA2T00128889001,GSBRNA2T00122385001,GSBRNA2T00109450001,GSBRNA2T00109484001
GO:BP	cellular response to stimulus	GO:0051716	0.564976	0.24797	1908	145	4	80927	GSBRNA2T00086813001,GSBRNA2T00010066001,GSBRNA2T00146028001,GSBRNA2T00146153001
GO:BP	cellular amino acid metabolic process	GO:0006520	0.566828	0.246549	853	145	2	80927	GSBRNA2T00130859001,GSBRNA2T00109450001
GO:BP	anion transport	GO:0006820	0.567627	0.245937	338	145	1	80927	GSBRNA2T00115966001
GO:BP	biological regulation	GO:0065007	0.57833	0.237824	6342	145	12	80927	GSBRNA2T00126929001,GSBRNA2T00036858001,GSBRNA2T00078837001,GSBRNA2T00086813001,GSBRNA2T00010066001,GSBRNA2T00140327001,GSBRNA2T00146197001,GSBRNA2T00146028001,GSBRNA2T00146222001,GSBRNA2T00146153001,GSBRNA2T00128889001,GSBRNA2T00109484001
GO:BP	phospholipid metabolic process	GO:0006644	0.583228	0.234162	355	145	1	80927	GSBRNA2T00115966001
GO:BP	intracellular signal transduction	GO:0035556	0.587697	0.230846	363	145	1	80927	GSBRNA2T00146028001
GO:BP	cellular macromolecule metabolic process	GO:0044260	0.587697	0.230846	11385	145	21	80927	GSBRNA2T00004540001,GSBRNA2T00130184001,GSBRNA2T00058096001,GSBRNA2T00126929001,GSBRNA2T00036858001,GSBRNA2T00078837001,GSBRNA2T00086813001,GSBRNA2T00134859001,GSBRNA2T00088386001,GSBRNA2T00073600001,GSBRNA2T00140327001,GSBRNA2T00047532001,GSBRNA2T00146197001,GSBRNA2T00146223001,GSBRNA2T00146222001,GSBRNA2T00146090001,GSBRNA2T00128889001,GSBRNA2T00096259001,GSBRNA2T00109450001,GSBRNA2T00109485001…
GO:BP	carboxylic acid metabolic process	GO:0019752	0.593796	0.226363	1458	145	3	80927	GSBRNA2T00130859001,GSBRNA2T00027085001,GSBRNA2T00109450001
GO:BP	oxoacid metabolic process	GO:0043436	0.597131	0.22393	1470	145	3	80927	GSBRNA2T00130859001,GSBRNA2T00027085001,GSBRNA2T00109450001
GO:BP	organic acid metabolic process	GO:0006082	0.597131	0.22393	1474	145	3	80927	GSBRNA2T00130859001,GSBRNA2T00027085001,GSBRNA2T00109450001
GO:BP	tRNA metabolic process	GO:0006399	0.597131	0.22393	380	145	1	80927	GSBRNA2T00109450001
GO:BP	protein ubiquitination	GO:0016567	0.629764	0.200822	413	145	1	80927	GSBRNA2T00134859001
GO:BP	heterocycle metabolic process	GO:0046483	0.640292	0.193622	6658	145	12	80927	GSBRNA2T00126929001,GSBRNA2T00036858001,GSBRNA2T00078837001,GSBRNA2T00086813001,GSBRNA2T00140327001,GSBRNA2T00146197001,GSBRNA2T00146223001,GSBRNA2T00146222001,GSBRNA2T00128889001,GSBRNA2T00122385001,GSBRNA2T00109450001,GSBRNA2T00109484001
GO:BP	monovalent inorganic cation transport	GO:0015672	0.641847	0.192568	430	145	1	80927	GSBRNA2T00087845001
GO:BP	translation	GO:0006412	0.643653	0.191348	1585	145	3	80927	GSBRNA2T00146090001,GSBRNA2T00109450001,GSBRNA2T00109485001
GO:BP	cellular aromatic compound metabolic process	GO:0006725	0.64561	0.19003	6709	145	12	80927	GSBRNA2T00126929001,GSBRNA2T00036858001,GSBRNA2T00078837001,GSBRNA2T00086813001,GSBRNA2T00140327001,GSBRNA2T00146197001,GSBRNA2T00146223001,GSBRNA2T00146222001,GSBRNA2T00128889001,GSBRNA2T00122385001,GSBRNA2T00109450001,GSBRNA2T00109484001
GO:BP	protein modification by small protein conjugation	GO:0032446	0.65538	0.183507	452	145	1	80927	GSBRNA2T00134859001
GO:BP	cellular component biogenesis	GO:0044085	0.655414	0.183484	1042	145	2	80927	GSBRNA2T00091741001,GSBRNA2T00073600001
GO:BP	cellular response to chemical stimulus	GO:0070887	0.655795	0.183232	462	145	1	80927	GSBRNA2T00086813001
GO:BP	macromolecule metabolic process	GO:0043170	0.655795	0.183232	14154	145	25	80927	GSBRNA2T00004540001,GSBRNA2T00130184001,GSBRNA2T00058096001,GSBRNA2T00126929001,GSBRNA2T00000399001,GSBRNA2T00036858001,GSBRNA2T00078837001,GSBRNA2T00086813001,GSBRNA2T00009474001,GSBRNA2T00134859001,GSBRNA2T00088386001,GSBRNA2T00073600001,GSBRNA2T00140327001,GSBRNA2T00047532001,GSBRNA2T00146197001,GSBRNA2T00146042001,GSBRNA2T00146223001,GSBRNA2T00146222001,GSBRNA2T00146090001,GSBRNA2T00128889001…
GO:BP	cellular protein-containing complex assembly	GO:0034622	0.655795	0.183232	462	145	1	80927	GSBRNA2T00091741001
GO:BP	protein-containing complex assembly	GO:0065003	0.667081	0.175821	482	145	1	80927	GSBRNA2T00091741001
GO:BP	alpha-amino acid metabolic process	GO:1901605	0.667081	0.175821	480	145	1	80927	GSBRNA2T00130859001
GO:BP	carbohydrate derivative metabolic process	GO:1901135	0.672376	0.172388	1097	145	2	80927	GSBRNA2T00088386001,GSBRNA2T00146034001
GO:BP	monocarboxylic acid metabolic process	GO:0032787	0.679809	0.167613	503	145	1	80927	GSBRNA2T00027085001
GO:BP	carbohydrate catabolic process	GO:0016052	0.683811	0.165064	511	145	1	80927	GSBRNA2T00009474001
GO:BP	macromolecule localization	GO:0033036	0.689003	0.161779	1141	145	2	80927	GSBRNA2T00150941001,GSBRNA2T00115966001
GO:BP	chromosome organization	GO:0051276	0.690654	0.160739	526	145	1	80927	GSBRNA2T00091741001
GO:BP	inorganic cation transmembrane transport	GO:0098662	0.69197	0.159913	531	145	1	80927	GSBRNA2T00087845001
GO:BP	ncRNA metabolic process	GO:0034660	0.697152	0.156673	543	145	1	80927	GSBRNA2T00109450001
GO:BP	nucleotide metabolic process	GO:0009117	0.697152	0.156673	545	145	1	80927	GSBRNA2T00122385001
GO:BP	nucleoside phosphate metabolic process	GO:0006753	0.697152	0.156673	548	145	1	80927	GSBRNA2T00122385001
GO:BP	organophosphate biosynthetic process	GO:0090407	0.697159	0.156668	555	145	1	80927	GSBRNA2T00122385001
GO:BP	cation transmembrane transport	GO:0098655	0.697159	0.156668	553	145	1	80927	GSBRNA2T00087845001
GO:BP	protein-containing complex subunit organization	GO:0043933	0.701116	0.15421	564	145	1	80927	GSBRNA2T00091741001
GO:BP	inorganic ion transmembrane transport	GO:0098660	0.708452	0.14969	578	145	1	80927	GSBRNA2T00087845001
GO:BP	nitrogen compound metabolic process	GO:0006807	0.750084	0.12489	14991	145	25	80927	GSBRNA2T00004540001,GSBRNA2T00130859001,GSBRNA2T00058096001,GSBRNA2T00126929001,GSBRNA2T00000399001,GSBRNA2T00036858001,GSBRNA2T00078837001,GSBRNA2T00086813001,GSBRNA2T00134859001,GSBRNA2T00088386001,GSBRNA2T00140327001,GSBRNA2T00047532001,GSBRNA2T00146197001,GSBRNA2T00146042001,GSBRNA2T00146223001,GSBRNA2T00146222001,GSBRNA2T00146090001,GSBRNA2T00128889001,GSBRNA2T00096259001,GSBRNA2T00122385001…
GO:BP	lipid biosynthetic process	GO:0008610	0.753313	0.123024	669	145	1	80927	GSBRNA2T00130161001
GO:BP	cellular component assembly	GO:0022607	0.753313	0.123024	666	145	1	80927	GSBRNA2T00091741001
GO:BP	ion transport	GO:0006811	0.753313	0.123024	1338	145	2	80927	GSBRNA2T00087845001,GSBRNA2T00115966001
GO:BP	carbohydrate derivative biosynthetic process	GO:1901137	0.753313	0.123024	660	145	1	80927	GSBRNA2T00088386001
GO:BP	nucleobase-containing small molecule metabolic process	GO:0055086	0.753496	0.122919	674	145	1	80927	GSBRNA2T00122385001
GO:BP	organic substance transport	GO:0071702	0.76965	0.113707	1415	145	2	80927	GSBRNA2T00150941001,GSBRNA2T00115966001
GO:BP	ion transmembrane transport	GO:0034220	0.76965	0.113707	713	145	1	80927	GSBRNA2T00087845001
GO:BP	organonitrogen compound metabolic process	GO:1901564	0.813036	0.0898901	9713	145	15	80927	GSBRNA2T00004540001,GSBRNA2T00130859001,GSBRNA2T00058096001,GSBRNA2T00000399001,GSBRNA2T00134859001,GSBRNA2T00088386001,GSBRNA2T00047532001,GSBRNA2T00146042001,GSBRNA2T00146090001,GSBRNA2T00096259001,GSBRNA2T00122385001,GSBRNA2T00109460001,GSBRNA2T00109450001,GSBRNA2T00109485001,GSBRNA2T00109462001
GO:BP	protein metabolic process	GO:0019538	0.825686	0.0831849	8003	145	12	80927	GSBRNA2T00004540001,GSBRNA2T00058096001,GSBRNA2T00000399001,GSBRNA2T00134859001,GSBRNA2T00088386001,GSBRNA2T00047532001,GSBRNA2T00146042001,GSBRNA2T00146090001,GSBRNA2T00096259001,GSBRNA2T00109450001,GSBRNA2T00109485001,GSBRNA2T00109462001
GO:BP	small molecule biosynthetic process	GO:0044283	0.83204	0.0798558	866	145	1	80927	GSBRNA2T00130161001
GO:BP	cation transport	GO:0006812	0.845256	0.0730117	908	145	1	80927	GSBRNA2T00087845001
GO:BP	transmembrane transport	GO:0055085	0.848744	0.0712234	2420	145	3	80927	GSBRNA2T00087845001,GSBRNA2T00086082001,GSBRNA2T00005582001
GO:BP	cellular protein metabolic process	GO:0044267	0.887615	0.0517752	6705	145	9	80927	GSBRNA2T00004540001,GSBRNA2T00058096001,GSBRNA2T00134859001,GSBRNA2T00088386001,GSBRNA2T00047532001,GSBRNA2T00146090001,GSBRNA2T00096259001,GSBRNA2T00109450001,GSBRNA2T00109485001
GO:BP	phosphorus metabolic process	GO:0006793	0.887615	0.0517752	4739	145	6	80927	GSBRNA2T00130856001,GSBRNA2T00058096001,GSBRNA2T00047532001,GSBRNA2T00146034001,GSBRNA2T00122385001,GSBRNA2T00115966001
GO:BP	phosphate-containing compound metabolic process	GO:0006796	0.887615	0.0517752	4724	145	6	80927	GSBRNA2T00130856001,GSBRNA2T00058096001,GSBRNA2T00047532001,GSBRNA2T00146034001,GSBRNA2T00122385001,GSBRNA2T00115966001
GO:BP	organelle organization	GO:0006996	0.910894	0.0405321	1206	145	1	80927	GSBRNA2T00091741001
GO:BP	establishment of localization	GO:0051234	0.910894	0.0405321	4331	145	5	80927	GSBRNA2T00087845001,GSBRNA2T00086082001,GSBRNA2T00005582001,GSBRNA2T00150941001,GSBRNA2T00115966001
GO:BP	response to stress	GO:0006950	0.910894	0.0405321	1202	145	1	80927	GSBRNA2T00126684001
GO:BP	transport	GO:0006810	0.910894	0.0405321	4306	145	5	80927	GSBRNA2T00087845001,GSBRNA2T00086082001,GSBRNA2T00005582001,GSBRNA2T00150941001,GSBRNA2T00115966001
GO:BP	localization	GO:0051179	0.911787	0.0401067	4366	145	5	80927	GSBRNA2T00087845001,GSBRNA2T00086082001,GSBRNA2T00005582001,GSBRNA2T00150941001,GSBRNA2T00115966001
GO:BP	cellular protein modification process	GO:0006464	0.94292	0.0255253	4767	145	5	80927	GSBRNA2T00058096001,GSBRNA2T00134859001,GSBRNA2T00088386001,GSBRNA2T00047532001,GSBRNA2T00096259001
GO:BP	protein modification process	GO:0036211	0.94292	0.0255253	4767	145	5	80927	GSBRNA2T00058096001,GSBRNA2T00134859001,GSBRNA2T00088386001,GSBRNA2T00047532001,GSBRNA2T00096259001
GO:BP	macromolecule modification	GO:0043412	0.953432	0.0207104	5020	145	5	80927	GSBRNA2T00058096001,GSBRNA2T00134859001,GSBRNA2T00088386001,GSBRNA2T00047532001,GSBRNA2T00096259001
GO:BP	phosphorylation	GO:0016310	0.953432	0.0207104	3425	145	3	80927	GSBRNA2T00130856001,GSBRNA2T00058096001,GSBRNA2T00047532001
GO:BP	protein phosphorylation	GO:0006468	0.971527	0.0125451	2976	145	2	80927	GSBRNA2T00058096001,GSBRNA2T00047532001
KEGG	Monoterpenoid biosynthesis	KEGG:00902	0.0321939	1.49223	3	145	1	80927	GSBRNA2T00077994001
KEGG	Oxidative phosphorylation	KEGG:00190	0.325417	0.48756	64	145	1	80927	GSBRNA2T00018219001
KEGG	Plant hormone signal transduction	KEGG:04075	0.407644	0.389719	127	145	1	80927	GSBRNA2T00010292001
KEGG	Biosynthesis of secondary metabolites	KEGG:01110	0.599201	0.222427	435	145	1	80927	GSBRNA2T00077994001
KEGG	Metabolic pathways	KEGG:01100	0.599201	0.222427	816	145	2	80927	GSBRNA2T00018219001,GSBRNA2T00077994001
KEGG	KEGG root term	KEGG:00000	0.599201	0.222427	1724	145	3	80927	GSBRNA2T00010292001,GSBRNA2T00018219001,GSBRNA2T00077994001

## Sheet: leaf_DEGs_harboring_important_r
source	term_name	term_id	adjusted_p_value	negative_log10_of_adjusted_p_value	term_size	query_size	intersection_size	effective_domain_size	intersections
GO:BP	chaperone-mediated protein folding	GO:0061077	0.0164197	1.78463	1	44	1	80927	GSBRNA2T00015759001
GO:BP	'de novo' posttranslational protein folding	GO:0051084	0.0164197	1.78463	1	44	1	80927	GSBRNA2T00015759001
GO:BP	chaperone cofactor-dependent protein refolding	GO:0051085	0.0164197	1.78463	1	44	1	80927	GSBRNA2T00015759001
GO:BP	oxidation-reduction process	GO:0055114	0.0164197	1.78463	3602	44	9	80927	GSBRNA2T00130856001,GSBRNA2T00018263001,GSBRNA2T00146639001,GSBRNA2T00010065001,GSBRNA2T00108858001,GSBRNA2T00146103001,GSBRNA2T00146034001,GSBRNA2T00052803001,GSBRNA2T00043435001
GO:BP	'de novo' protein folding	GO:0006458	0.0164197	1.78463	1	44	1	80927	GSBRNA2T00015759001
GO:BP	secondary alcohol biosynthetic process	GO:1902653	0.0372779	1.42855	5	44	1	80927	GSBRNA2T00130161001
GO:BP	ergosterol metabolic process	GO:0008204	0.0372779	1.42855	5	44	1	80927	GSBRNA2T00130161001
GO:BP	cellular lipid biosynthetic process	GO:0097384	0.0372779	1.42855	5	44	1	80927	GSBRNA2T00130161001
GO:BP	cellular alcohol biosynthetic process	GO:0044108	0.0372779	1.42855	5	44	1	80927	GSBRNA2T00130161001
GO:BP	ergosterol biosynthetic process	GO:0006696	0.0372779	1.42855	5	44	1	80927	GSBRNA2T00130161001
GO:BP	cellular alcohol metabolic process	GO:0044107	0.0372779	1.42855	5	44	1	80927	GSBRNA2T00130161001
GO:BP	phytosteroid metabolic process	GO:0016128	0.0378414	1.42203	6	44	1	80927	GSBRNA2T00130161001
GO:BP	phytosteroid biosynthetic process	GO:0016129	0.0378414	1.42203	6	44	1	80927	GSBRNA2T00130161001
GO:BP	mitochondrial electron transport, NADH to ubiquinone	GO:0006120	0.060046	1.22152	11	44	1	80927	GSBRNA2T00130856001
GO:BP	lipid metabolic process	GO:0006629	0.060046	1.22152	1321	44	4	80927	GSBRNA2T00130161001,GSBRNA2T00091120001,GSBRNA2T00108858001,GSBRNA2T00052803001
GO:BP	secondary alcohol metabolic process	GO:1902652	0.0664929	1.17722	13	44	1	80927	GSBRNA2T00130161001
GO:BP	generation of precursor metabolites and energy	GO:0006091	0.0716195	1.14497	755	44	3	80927	GSBRNA2T00130856001,GSBRNA2T00010065001,GSBRNA2T00146034001
GO:BP	'de novo' pyrimidine nucleobase biosynthetic process	GO:0006207	0.102749	0.988221	24	44	1	80927	GSBRNA2T00146103001
GO:BP	electron transport chain	GO:0022900	0.102749	0.988221	342	44	2	80927	GSBRNA2T00130856001,GSBRNA2T00010065001
GO:BP	pyrimidine nucleobase biosynthetic process	GO:0019856	0.102749	0.988221	29	44	1	80927	GSBRNA2T00146103001
GO:BP	mitochondrial ATP synthesis coupled electron transport	GO:0042775	0.102749	0.988221	26	44	1	80927	GSBRNA2T00130856001
GO:BP	pyrimidine nucleobase metabolic process	GO:0006206	0.102749	0.988221	29	44	1	80927	GSBRNA2T00146103001
GO:BP	proton export across plasma membrane	GO:0120029	0.102749	0.988221	25	44	1	80927	GSBRNA2T00082680001
GO:BP	pentose-phosphate shunt	GO:0006098	0.105792	0.975548	43	44	1	80927	GSBRNA2T00146034001
GO:BP	sterol metabolic process	GO:0016125	0.105792	0.975548	42	44	1	80927	GSBRNA2T00130161001
GO:BP	oxidative phosphorylation	GO:0006119	0.105792	0.975548	39	44	1	80927	GSBRNA2T00130856001
GO:BP	export across plasma membrane	GO:0140115	0.105792	0.975548	37	44	1	80927	GSBRNA2T00082680001
GO:BP	ATP synthesis coupled electron transport	GO:0042773	0.105792	0.975548	36	44	1	80927	GSBRNA2T00130856001
GO:BP	NADPH regeneration	GO:0006740	0.105792	0.975548	43	44	1	80927	GSBRNA2T00146034001
GO:BP	sterol biosynthetic process	GO:0016126	0.105792	0.975548	38	44	1	80927	GSBRNA2T00130161001
GO:BP	alcohol biosynthetic process	GO:0046165	0.105792	0.975548	41	44	1	80927	GSBRNA2T00130161001
GO:BP	response to heat	GO:0009408	0.105792	0.975548	32	44	1	80927	GSBRNA2T00015759001
GO:BP	glucose 6-phosphate metabolic process	GO:0051156	0.105792	0.975548	43	44	1	80927	GSBRNA2T00146034001
GO:BP	respiratory electron transport chain	GO:0022904	0.107399	0.968999	45	44	1	80927	GSBRNA2T00130856001
GO:BP	response to temperature stimulus	GO:0009266	0.113484	0.945064	49	44	1	80927	GSBRNA2T00015759001
GO:BP	nucleobase biosynthetic process	GO:0046112	0.116339	0.934273	53	44	1	80927	GSBRNA2T00146103001
GO:BP	nucleobase metabolic process	GO:0009112	0.116339	0.934273	57	44	1	80927	GSBRNA2T00146103001
GO:BP	steroid metabolic process	GO:0008202	0.116339	0.934273	59	44	1	80927	GSBRNA2T00130161001
GO:BP	NADP metabolic process	GO:0006739	0.116339	0.934273	55	44	1	80927	GSBRNA2T00146034001
GO:BP	biological_process	GO:0008150	0.116339	0.934273	30273	44	23	80927	GSBRNA2T00081605001,GSBRNA2T00130856001,GSBRNA2T00130161001,GSBRNA2T00126801001,GSBRNA2T00148671001,GSBRNA2T00018263001,GSBRNA2T00021360001,GSBRNA2T00091120001,GSBRNA2T00146639001,GSBRNA2T00010065001,GSBRNA2T00082680001,GSBRNA2T00108858001,GSBRNA2T00140327001,GSBRNA2T00072625001,GSBRNA2T00055800001,GSBRNA2T00146103001,GSBRNA2T00146028001,GSBRNA2T00146034001,GSBRNA2T00070101001,GSBRNA2T00052803001…
GO:BP	steroid biosynthetic process	GO:0006694	0.116339	0.934273	54	44	1	80927	GSBRNA2T00130161001
GO:BP	branched-chain amino acid metabolic process	GO:0009081	0.117357	0.930491	61	44	1	80927	GSBRNA2T00021360001
GO:BP	organic hydroxy compound biosynthetic process	GO:1901617	0.169653	0.770439	91	44	1	80927	GSBRNA2T00130161001
GO:BP	xenobiotic transport	GO:0042908	0.171127	0.766681	94	44	1	80927	GSBRNA2T00055800001
GO:BP	lipid biosynthetic process	GO:0008610	0.172426	0.763398	669	44	2	80927	GSBRNA2T00130161001,GSBRNA2T00052803001
GO:BP	pyrimidine-containing compound metabolic process	GO:0072527	0.181181	0.741888	109	44	1	80927	GSBRNA2T00146103001
GO:BP	pyrimidine-containing compound biosynthetic process	GO:0072528	0.181181	0.741888	106	44	1	80927	GSBRNA2T00146103001
GO:BP	alcohol metabolic process	GO:0006066	0.181181	0.741888	107	44	1	80927	GSBRNA2T00130161001
GO:BP	plant-type cell wall organization	GO:0009664	0.190109	0.720998	117	44	1	80927	GSBRNA2T00081605001
GO:BP	metabolic process	GO:0008152	0.211845	0.673981	22188	44	17	80927	GSBRNA2T00130856001,GSBRNA2T00130161001,GSBRNA2T00126801001,GSBRNA2T00148671001,GSBRNA2T00018263001,GSBRNA2T00021360001,GSBRNA2T00091120001,GSBRNA2T00146639001,GSBRNA2T00010065001,GSBRNA2T00108858001,GSBRNA2T00140327001,GSBRNA2T00072625001,GSBRNA2T00146103001,GSBRNA2T00146034001,GSBRNA2T00070101001,GSBRNA2T00052803001,GSBRNA2T00043435001
GO:BP	plant-type cell wall organization or biogenesis	GO:0071669	0.218736	0.66008	141	44	1	80927	GSBRNA2T00081605001
GO:BP	phosphorelay signal transduction system	GO:0000160	0.221845	0.65395	146	44	1	80927	GSBRNA2T00146028001
GO:BP	cellular respiration	GO:0045333	0.223388	0.65094	150	44	1	80927	GSBRNA2T00130856001
GO:BP	export from cell	GO:0140352	0.244054	0.612514	171	44	1	80927	GSBRNA2T00082680001
GO:BP	energy derivation by oxidation of organic compounds	GO:0015980	0.244054	0.612514	170	44	1	80927	GSBRNA2T00130856001
GO:BP	organic hydroxy compound metabolic process	GO:1901615	0.247716	0.606045	177	44	1	80927	GSBRNA2T00130161001
GO:BP	cellular process	GO:0009987	0.273504	0.563037	23307	44	17	80927	GSBRNA2T00081605001,GSBRNA2T00130856001,GSBRNA2T00130161001,GSBRNA2T00126801001,GSBRNA2T00148671001,GSBRNA2T00021360001,GSBRNA2T00010065001,GSBRNA2T00082680001,GSBRNA2T00140327001,GSBRNA2T00072625001,GSBRNA2T00055800001,GSBRNA2T00146103001,GSBRNA2T00146028001,GSBRNA2T00146034001,GSBRNA2T00070101001,GSBRNA2T00122467001,GSBRNA2T00015759001
GO:BP	phosphorylation	GO:0016310	0.288589	0.539721	3425	44	4	80927	GSBRNA2T00130856001,GSBRNA2T00126801001,GSBRNA2T00148671001,GSBRNA2T00070101001
GO:BP	phosphorus metabolic process	GO:0006793	0.288589	0.539721	4739	44	5	80927	GSBRNA2T00130856001,GSBRNA2T00126801001,GSBRNA2T00148671001,GSBRNA2T00146034001,GSBRNA2T00070101001
GO:BP	phosphate-containing compound metabolic process	GO:0006796	0.288589	0.539721	4724	44	5	80927	GSBRNA2T00130856001,GSBRNA2T00126801001,GSBRNA2T00148671001,GSBRNA2T00146034001,GSBRNA2T00070101001
GO:BP	small molecule metabolic process	GO:0044281	0.338235	0.470782	2361	44	3	80927	GSBRNA2T00130161001,GSBRNA2T00021360001,GSBRNA2T00146103001
GO:BP	signaling	GO:0023052	0.342049	0.465911	1276	44	2	80927	GSBRNA2T00148671001,GSBRNA2T00146028001
GO:BP	proton transmembrane transport	GO:1902600	0.342049	0.465911	307	44	1	80927	GSBRNA2T00082680001
GO:BP	signal transduction	GO:0007165	0.342049	0.465911	1262	44	2	80927	GSBRNA2T00148671001,GSBRNA2T00146028001
GO:BP	transmembrane transport	GO:0055085	0.342049	0.465911	2420	44	3	80927	GSBRNA2T00082680001,GSBRNA2T00055800001,GSBRNA2T00122467001
GO:BP	ATP metabolic process	GO:0046034	0.342049	0.465911	296	44	1	80927	GSBRNA2T00130856001
GO:BP	response to abiotic stimulus	GO:0009628	0.342049	0.465911	285	44	1	80927	GSBRNA2T00015759001
GO:BP	protein folding	GO:0006457	0.342049	0.465911	298	44	1	80927	GSBRNA2T00015759001
GO:BP	intracellular signal transduction	GO:0035556	0.392852	0.405771	363	44	1	80927	GSBRNA2T00146028001
GO:BP	cell communication	GO:0007154	0.412912	0.384142	1476	44	2	80927	GSBRNA2T00148671001,GSBRNA2T00146028001
GO:BP	monovalent inorganic cation transport	GO:0015672	0.444526	0.352103	430	44	1	80927	GSBRNA2T00082680001
GO:BP	response to stimulus	GO:0050896	0.453775	0.34316	2968	44	3	80927	GSBRNA2T00148671001,GSBRNA2T00146028001,GSBRNA2T00015759001
GO:BP	protein phosphorylation	GO:0006468	0.453775	0.34316	2976	44	3	80927	GSBRNA2T00126801001,GSBRNA2T00148671001,GSBRNA2T00070101001
GO:BP	organic cyclic compound biosynthetic process	GO:1901362	0.481194	0.317679	4570	44	4	80927	GSBRNA2T00130161001,GSBRNA2T00140327001,GSBRNA2T00072625001,GSBRNA2T00146103001
GO:BP	primary metabolic process	GO:0044238	0.483014	0.31604	17680	44	12	80927	GSBRNA2T00130161001,GSBRNA2T00126801001,GSBRNA2T00148671001,GSBRNA2T00021360001,GSBRNA2T00091120001,GSBRNA2T00108858001,GSBRNA2T00140327001,GSBRNA2T00072625001,GSBRNA2T00146103001,GSBRNA2T00146034001,GSBRNA2T00070101001,GSBRNA2T00052803001
GO:BP	inorganic cation transmembrane transport	GO:0098662	0.499764	0.301235	531	44	1	80927	GSBRNA2T00082680001
GO:BP	cation transmembrane transport	GO:0098655	0.510847	0.291709	553	44	1	80927	GSBRNA2T00082680001
GO:BP	cellular metabolic process	GO:0044237	0.515186	0.288036	16367	44	11	80927	GSBRNA2T00130856001,GSBRNA2T00130161001,GSBRNA2T00126801001,GSBRNA2T00148671001,GSBRNA2T00021360001,GSBRNA2T00010065001,GSBRNA2T00140327001,GSBRNA2T00072625001,GSBRNA2T00146103001,GSBRNA2T00146034001,GSBRNA2T00070101001
GO:BP	inorganic ion transmembrane transport	GO:0098660	0.517135	0.286396	578	44	1	80927	GSBRNA2T00082680001
GO:BP	cellular response to stimulus	GO:0051716	0.524987	0.279852	1908	44	2	80927	GSBRNA2T00148671001,GSBRNA2T00146028001
GO:BP	nucleobase-containing small molecule metabolic process	GO:0055086	0.553564	0.256832	674	44	1	80927	GSBRNA2T00146103001
GO:BP	organic substance metabolic process	GO:0071704	0.553564	0.256832	18575	44	12	80927	GSBRNA2T00130161001,GSBRNA2T00126801001,GSBRNA2T00148671001,GSBRNA2T00021360001,GSBRNA2T00091120001,GSBRNA2T00108858001,GSBRNA2T00140327001,GSBRNA2T00072625001,GSBRNA2T00146103001,GSBRNA2T00146034001,GSBRNA2T00070101001,GSBRNA2T00052803001
GO:BP	cell wall organization	GO:0071555	0.553564	0.256832	664	44	1	80927	GSBRNA2T00081605001
GO:BP	external encapsulating structure organization	GO:0045229	0.553564	0.256832	668	44	1	80927	GSBRNA2T00081605001
GO:BP	ion transmembrane transport	GO:0034220	0.573073	0.24179	713	44	1	80927	GSBRNA2T00082680001
GO:BP	regulation of cellular process	GO:0050794	0.58918	0.229752	5382	44	4	80927	GSBRNA2T00148671001,GSBRNA2T00140327001,GSBRNA2T00072625001,GSBRNA2T00146028001
GO:BP	cell wall organization or biogenesis	GO:0071554	0.603597	0.219253	782	44	1	80927	GSBRNA2T00081605001
GO:BP	cellular lipid metabolic process	GO:0044255	0.627657	0.202277	833	44	1	80927	GSBRNA2T00130161001
GO:BP	cellular amino acid metabolic process	GO:0006520	0.632367	0.199031	853	44	1	80927	GSBRNA2T00021360001
GO:BP	small molecule biosynthetic process	GO:0044283	0.632835	0.19871	866	44	1	80927	GSBRNA2T00130161001
GO:BP	regulation of biological process	GO:0050789	0.642415	0.192184	5805	44	4	80927	GSBRNA2T00148671001,GSBRNA2T00140327001,GSBRNA2T00072625001,GSBRNA2T00146028001
GO:BP	cation transport	GO:0006812	0.642415	0.192184	908	44	1	80927	GSBRNA2T00082680001
GO:BP	establishment of localization	GO:0051234	0.676279	0.169874	4331	44	3	80927	GSBRNA2T00082680001,GSBRNA2T00055800001,GSBRNA2T00122467001
GO:BP	transport	GO:0006810	0.676279	0.169874	4306	44	3	80927	GSBRNA2T00082680001,GSBRNA2T00055800001,GSBRNA2T00122467001
GO:BP	organophosphate metabolic process	GO:0019637	0.67634	0.169835	1027	44	1	80927	GSBRNA2T00146034001
GO:BP	localization	GO:0051179	0.67634	0.169835	4366	44	3	80927	GSBRNA2T00082680001,GSBRNA2T00055800001,GSBRNA2T00122467001
GO:BP	heterocycle biosynthetic process	GO:0018130	0.677619	0.169014	4459	44	3	80927	GSBRNA2T00140327001,GSBRNA2T00072625001,GSBRNA2T00146103001
GO:BP	organic substance biosynthetic process	GO:1901576	0.677619	0.169014	7960	44	5	80927	GSBRNA2T00130161001,GSBRNA2T00140327001,GSBRNA2T00072625001,GSBRNA2T00146103001,GSBRNA2T00052803001
GO:BP	biological regulation	GO:0065007	0.688716	0.16196	6342	44	4	80927	GSBRNA2T00148671001,GSBRNA2T00140327001,GSBRNA2T00072625001,GSBRNA2T00146028001
GO:BP	carbohydrate derivative metabolic process	GO:1901135	0.688716	0.16196	1097	44	1	80927	GSBRNA2T00146034001
GO:BP	cellular protein modification process	GO:0006464	0.702826	0.153152	4767	44	3	80927	GSBRNA2T00126801001,GSBRNA2T00148671001,GSBRNA2T00070101001
GO:BP	protein modification process	GO:0036211	0.702826	0.153152	4767	44	3	80927	GSBRNA2T00126801001,GSBRNA2T00148671001,GSBRNA2T00070101001
GO:BP	response to stress	GO:0006950	0.702826	0.153152	1202	44	1	80927	GSBRNA2T00015759001
GO:BP	biosynthetic process	GO:0009058	0.702826	0.153152	8269	44	5	80927	GSBRNA2T00130161001,GSBRNA2T00140327001,GSBRNA2T00072625001,GSBRNA2T00146103001,GSBRNA2T00052803001
GO:BP	organic cyclic compound metabolic process	GO:1901360	0.720824	0.14217	6789	44	4	80927	GSBRNA2T00130161001,GSBRNA2T00140327001,GSBRNA2T00072625001,GSBRNA2T00146103001
GO:BP	regulation of cellular biosynthetic process	GO:0031326	0.720824	0.14217	3470	44	2	80927	GSBRNA2T00140327001,GSBRNA2T00072625001
GO:BP	macromolecule modification	GO:0043412	0.720824	0.14217	5020	44	3	80927	GSBRNA2T00126801001,GSBRNA2T00148671001,GSBRNA2T00070101001
GO:BP	carboxylic acid metabolic process	GO:0019752	0.720824	0.14217	1458	44	1	80927	GSBRNA2T00021360001
GO:BP	oxoacid metabolic process	GO:0043436	0.720824	0.14217	1470	44	1	80927	GSBRNA2T00021360001
GO:BP	regulation of biosynthetic process	GO:0009889	0.720824	0.14217	3470	44	2	80927	GSBRNA2T00140327001,GSBRNA2T00072625001
GO:BP	regulation of macromolecule biosynthetic process	GO:0010556	0.720824	0.14217	3454	44	2	80927	GSBRNA2T00140327001,GSBRNA2T00072625001
GO:BP	regulation of nucleic acid-templated transcription	GO:1903506	0.720824	0.14217	3361	44	2	80927	GSBRNA2T00140327001,GSBRNA2T00072625001
GO:BP	regulation of RNA biosynthetic process	GO:2001141	0.720824	0.14217	3361	44	2	80927	GSBRNA2T00140327001,GSBRNA2T00072625001
GO:BP	ion transport	GO:0006811	0.720824	0.14217	1338	44	1	80927	GSBRNA2T00082680001
GO:BP	regulation of transcription, DNA-templated	GO:0006355	0.720824	0.14217	3339	44	2	80927	GSBRNA2T00140327001,GSBRNA2T00072625001
GO:BP	organic acid metabolic process	GO:0006082	0.720824	0.14217	1474	44	1	80927	GSBRNA2T00021360001
GO:BP	regulation of nucleobase-containing compound metabolic process	GO:0019219	0.720824	0.14217	3398	44	2	80927	GSBRNA2T00140327001,GSBRNA2T00072625001
GO:BP	regulation of RNA metabolic process	GO:0051252	0.720824	0.14217	3385	44	2	80927	GSBRNA2T00140327001,GSBRNA2T00072625001
GO:BP	regulation of cellular macromolecule biosynthetic process	GO:2000112	0.720824	0.14217	3432	44	2	80927	GSBRNA2T00140327001,GSBRNA2T00072625001
GO:BP	transcription, DNA-templated	GO:0006351	0.734031	0.134286	3691	44	2	80927	GSBRNA2T00140327001,GSBRNA2T00072625001
GO:BP	regulation of cellular metabolic process	GO:0031323	0.734031	0.134286	3760	44	2	80927	GSBRNA2T00140327001,GSBRNA2T00072625001
GO:BP	RNA biosynthetic process	GO:0032774	0.734031	0.134286	3729	44	2	80927	GSBRNA2T00140327001,GSBRNA2T00072625001
GO:BP	regulation of gene expression	GO:0010468	0.734031	0.134286	3654	44	2	80927	GSBRNA2T00140327001,GSBRNA2T00072625001
GO:BP	regulation of nitrogen compound metabolic process	GO:0051171	0.734031	0.134286	3675	44	2	80927	GSBRNA2T00140327001,GSBRNA2T00072625001
GO:BP	nucleic acid-templated transcription	GO:0097659	0.734031	0.134286	3723	44	2	80927	GSBRNA2T00140327001,GSBRNA2T00072625001
GO:BP	regulation of primary metabolic process	GO:0080090	0.734031	0.134286	3691	44	2	80927	GSBRNA2T00140327001,GSBRNA2T00072625001
GO:BP	cellular biosynthetic process	GO:0044249	0.7347	0.13389	7791	44	4	80927	GSBRNA2T00130161001,GSBRNA2T00140327001,GSBRNA2T00072625001,GSBRNA2T00146103001
GO:BP	organonitrogen compound metabolic process	GO:1901564	0.7347	0.13389	9713	44	5	80927	GSBRNA2T00126801001,GSBRNA2T00148671001,GSBRNA2T00021360001,GSBRNA2T00146103001,GSBRNA2T00070101001
GO:BP	cellular nitrogen compound biosynthetic process	GO:0044271	0.750919	0.124407	6045	44	3	80927	GSBRNA2T00140327001,GSBRNA2T00072625001,GSBRNA2T00146103001
GO:BP	regulation of macromolecule metabolic process	GO:0060255	0.750919	0.124407	3989	44	2	80927	GSBRNA2T00140327001,GSBRNA2T00072625001
GO:BP	regulation of metabolic process	GO:0019222	0.750919	0.124407	4035	44	2	80927	GSBRNA2T00140327001,GSBRNA2T00072625001
GO:BP	nucleobase-containing compound biosynthetic process	GO:0034654	0.761919	0.118091	4144	44	2	80927	GSBRNA2T00140327001,GSBRNA2T00072625001
GO:BP	nucleobase-containing compound metabolic process	GO:0006139	0.763081	0.117429	6262	44	3	80927	GSBRNA2T00140327001,GSBRNA2T00072625001,GSBRNA2T00146103001
GO:BP	carbohydrate metabolic process	GO:0005975	0.78332	0.106061	2155	44	1	80927	GSBRNA2T00146034001
GO:BP	aromatic compound biosynthetic process	GO:0019438	0.785411	0.104903	4431	44	2	80927	GSBRNA2T00140327001,GSBRNA2T00072625001
GO:BP	cellular protein metabolic process	GO:0044267	0.785643	0.104775	6705	44	3	80927	GSBRNA2T00126801001,GSBRNA2T00148671001,GSBRNA2T00070101001
GO:BP	heterocycle metabolic process	GO:0046483	0.785643	0.104775	6658	44	3	80927	GSBRNA2T00140327001,GSBRNA2T00072625001,GSBRNA2T00146103001
GO:BP	cellular aromatic compound metabolic process	GO:0006725	0.785643	0.104775	6709	44	3	80927	GSBRNA2T00140327001,GSBRNA2T00072625001,GSBRNA2T00146103001
GO:BP	nitrogen compound metabolic process	GO:0006807	0.79364	0.100377	14991	44	7	80927	GSBRNA2T00126801001,GSBRNA2T00148671001,GSBRNA2T00021360001,GSBRNA2T00140327001,GSBRNA2T00072625001,GSBRNA2T00146103001,GSBRNA2T00070101001
GO:BP	cellular component organization	GO:0016043	0.79364	0.100377	2411	44	1	80927	GSBRNA2T00081605001
GO:BP	cellular macromolecule metabolic process	GO:0044260	0.814303	0.089214	11385	44	5	80927	GSBRNA2T00126801001,GSBRNA2T00148671001,GSBRNA2T00140327001,GSBRNA2T00072625001,GSBRNA2T00070101001
GO:BP	RNA metabolic process	GO:0016070	0.818199	0.0871412	5050	44	2	80927	GSBRNA2T00140327001,GSBRNA2T00072625001
GO:BP	cellular component organization or biogenesis	GO:0071840	0.818914	0.0867618	2701	44	1	80927	GSBRNA2T00081605001
GO:BP	organonitrogen compound biosynthetic process	GO:1901566	0.848159	0.0715229	2986	44	1	80927	GSBRNA2T00146103001
GO:BP	nucleic acid metabolic process	GO:0090304	0.849935	0.0706141	5577	44	2	80927	GSBRNA2T00140327001,GSBRNA2T00072625001
GO:BP	protein metabolic process	GO:0019538	0.851976	0.0695726	8003	44	3	80927	GSBRNA2T00126801001,GSBRNA2T00148671001,GSBRNA2T00070101001
GO:BP	cellular nitrogen compound metabolic process	GO:0034641	0.856816	0.0671125	8161	44	3	80927	GSBRNA2T00140327001,GSBRNA2T00072625001,GSBRNA2T00146103001
GO:BP	cellular macromolecule biosynthetic process	GO:0034645	0.867248	0.0618565	6037	44	2	80927	GSBRNA2T00140327001,GSBRNA2T00072625001
GO:BP	macromolecule biosynthetic process	GO:0009059	0.867646	0.0616575	6130	44	2	80927	GSBRNA2T00140327001,GSBRNA2T00072625001
GO:BP	gene expression	GO:0010467	0.883372	0.0538564	6484	44	2	80927	GSBRNA2T00140327001,GSBRNA2T00072625001
GO:BP	macromolecule metabolic process	GO:0043170	0.904019	0.0438226	14154	44	5	80927	GSBRNA2T00126801001,GSBRNA2T00148671001,GSBRNA2T00140327001,GSBRNA2T00072625001,GSBRNA2T00070101001
KEGG	Fatty acid metabolism	KEGG:01212	0.00104581	2.98055	29	44	2	80927	GSBRNA2T00003354001,GSBRNA2T00108858001
KEGG	Biosynthesis of unsaturated fatty acids	KEGG:01040	0.0165667	1.78076	11	44	1	80927	GSBRNA2T00108858001
KEGG	Fatty acid biosynthesis	KEGG:00061	0.0165667	1.78076	16	44	1	80927	GSBRNA2T00003354001
KEGG	Fatty acid degradation	KEGG:00071	0.0165667	1.78076	17	44	1	80927	GSBRNA2T00003354001
KEGG	Fatty acid elongation	KEGG:00062	0.0165667	1.78076	10	44	1	80927	GSBRNA2T00108858001
KEGG	Peroxisome	KEGG:04146	0.0258838	1.58697	32	44	1	80927	GSBRNA2T00003354001
KEGG	Metabolic pathways	KEGG:01100	0.0935662	1.02888	816	44	2	80927	GSBRNA2T00003354001,GSBRNA2T00108858001
KEGG	Biosynthesis of secondary metabolites	KEGG:01110	0.237572	0.624205	435	44	1	80927	GSBRNA2T00108858001
KEGG	KEGG root term	KEGG:00000	0.240932	0.618105	1724	44	2	80927	GSBRNA2T00003354001,GSBRNA2T00108858001

## Sheet: stem_DEGs_harboring_important_r
source	term_name	term_id	adjusted_p_value	negative_log10_of_adjusted_p_value	term_size	query_size	intersection_size	effective_domain_size	intersections
GO:BP	'de novo' posttranslational protein folding	GO:0051084	0.0515465	1.2878	1	81	1	80927	GSBRNA2T00015759001
GO:BP	chaperone cofactor-dependent protein refolding	GO:0051085	0.0515465	1.2878	1	81	1	80927	GSBRNA2T00015759001
GO:BP	chaperone-mediated protein folding	GO:0061077	0.0515465	1.2878	1	81	1	80927	GSBRNA2T00015759001
GO:BP	'de novo' protein folding	GO:0006458	0.0515465	1.2878	1	81	1	80927	GSBRNA2T00015759001
GO:BP	signaling	GO:0023052	0.200187	0.698565	1276	81	4	80927	GSBRNA2T00086813001,GSBRNA2T00148671001,GSBRNA2T00146028001,GSBRNA2T00146153001
GO:BP	response to heat	GO:0009408	0.200187	0.698565	32	81	1	80927	GSBRNA2T00015759001
GO:BP	regulation of cellular process	GO:0050794	0.200187	0.698565	5382	81	10	80927	GSBRNA2T00009752001,GSBRNA2T00036858001,GSBRNA2T00078837001,GSBRNA2T00086813001,GSBRNA2T00148671001,GSBRNA2T00146197001,GSBRNA2T00146028001,GSBRNA2T00146222001,GSBRNA2T00146153001,GSBRNA2T00109484001
GO:BP	response to temperature stimulus	GO:0009266	0.200187	0.698565	49	81	1	80927	GSBRNA2T00015759001
GO:BP	branched-chain amino acid metabolic process	GO:0009081	0.200187	0.698565	61	81	1	80927	GSBRNA2T00021360001
GO:BP	glutamine family amino acid catabolic process	GO:0009065	0.200187	0.698565	13	81	1	80927	GSBRNA2T00130859001
GO:BP	spermidine biosynthetic process	GO:0008295	0.200187	0.698565	29	81	1	80927	GSBRNA2T00130859001
GO:BP	spermidine metabolic process	GO:0008216	0.200187	0.698565	29	81	1	80927	GSBRNA2T00130859001
GO:BP	regulation of RNA metabolic process	GO:0051252	0.200187	0.698565	3385	81	7	80927	GSBRNA2T00009752001,GSBRNA2T00036858001,GSBRNA2T00078837001,GSBRNA2T00086813001,GSBRNA2T00146197001,GSBRNA2T00146222001,GSBRNA2T00109484001
GO:BP	cellular modified amino acid biosynthetic process	GO:0042398	0.200187	0.698565	55	81	1	80927	GSBRNA2T00109460001
GO:BP	signal transduction	GO:0007165	0.200187	0.698565	1262	81	4	80927	GSBRNA2T00086813001,GSBRNA2T00148671001,GSBRNA2T00146028001,GSBRNA2T00146153001
GO:BP	nucleic acid-templated transcription	GO:0097659	0.200187	0.698565	3723	81	8	80927	GSBRNA2T00009752001,GSBRNA2T00126797001,GSBRNA2T00036858001,GSBRNA2T00078837001,GSBRNA2T00086813001,GSBRNA2T00146197001,GSBRNA2T00146222001,GSBRNA2T00109484001
GO:BP	ATP synthesis coupled electron transport	GO:0042773	0.200187	0.698565	36	81	1	80927	GSBRNA2T00130856001
GO:BP	macromolecule biosynthetic process	GO:0009059	0.200187	0.698565	6130	81	11	80927	GSBRNA2T00009752001,GSBRNA2T00126797001,GSBRNA2T00036858001,GSBRNA2T00078837001,GSBRNA2T00086813001,GSBRNA2T00146197001,GSBRNA2T00146222001,GSBRNA2T00146090001,GSBRNA2T00143128001,GSBRNA2T00109485001,GSBRNA2T00109484001
GO:BP	nucleobase-containing compound biosynthetic process	GO:0034654	0.200187	0.698565	4144	81	8	80927	GSBRNA2T00009752001,GSBRNA2T00126797001,GSBRNA2T00036858001,GSBRNA2T00078837001,GSBRNA2T00086813001,GSBRNA2T00146197001,GSBRNA2T00146222001,GSBRNA2T00109484001
GO:BP	cellular nitrogen compound metabolic process	GO:0034641	0.200187	0.698565	8161	81	14	80927	GSBRNA2T00130859001,GSBRNA2T00009752001,GSBRNA2T00126797001,GSBRNA2T00036858001,GSBRNA2T00078837001,GSBRNA2T00086813001,GSBRNA2T00146638001,GSBRNA2T00146197001,GSBRNA2T00146222001,GSBRNA2T00146090001,GSBRNA2T00143128001,GSBRNA2T00109460001,GSBRNA2T00109485001,GSBRNA2T00109484001
GO:BP	superoxide metabolic process	GO:0006801	0.200187	0.698565	45	81	1	80927	GSBRNA2T00146102001
GO:BP	respiratory electron transport chain	GO:0022904	0.200187	0.698565	45	81	1	80927	GSBRNA2T00130856001
GO:BP	regulation of cellular biosynthetic process	GO:0031326	0.200187	0.698565	3470	81	7	80927	GSBRNA2T00009752001,GSBRNA2T00036858001,GSBRNA2T00078837001,GSBRNA2T00086813001,GSBRNA2T00146197001,GSBRNA2T00146222001,GSBRNA2T00109484001
GO:BP	regulation of nucleobase-containing compound metabolic process	GO:0019219	0.200187	0.698565	3398	81	7	80927	GSBRNA2T00009752001,GSBRNA2T00036858001,GSBRNA2T00078837001,GSBRNA2T00086813001,GSBRNA2T00146197001,GSBRNA2T00146222001,GSBRNA2T00109484001
GO:BP	nonribosomal peptide biosynthetic process	GO:0019184	0.200187	0.698565	15	81	1	80927	GSBRNA2T00109460001
GO:BP	protein urmylation	GO:0032447	0.200187	0.698565	6	81	1	80927	GSBRNA2T00146638001
GO:BP	regulation of macromolecule biosynthetic process	GO:0010556	0.200187	0.698565	3454	81	7	80927	GSBRNA2T00009752001,GSBRNA2T00036858001,GSBRNA2T00078837001,GSBRNA2T00086813001,GSBRNA2T00146197001,GSBRNA2T00146222001,GSBRNA2T00109484001
GO:BP	cellular macromolecule biosynthetic process	GO:0034645	0.200187	0.698565	6037	81	11	80927	GSBRNA2T00009752001,GSBRNA2T00126797001,GSBRNA2T00036858001,GSBRNA2T00078837001,GSBRNA2T00086813001,GSBRNA2T00146197001,GSBRNA2T00146222001,GSBRNA2T00146090001,GSBRNA2T00143128001,GSBRNA2T00109485001,GSBRNA2T00109484001
GO:BP	gene expression	GO:0010467	0.200187	0.698565	6484	81	12	80927	GSBRNA2T00009752001,GSBRNA2T00126797001,GSBRNA2T00036858001,GSBRNA2T00078837001,GSBRNA2T00086813001,GSBRNA2T00146638001,GSBRNA2T00146197001,GSBRNA2T00146222001,GSBRNA2T00146090001,GSBRNA2T00143128001,GSBRNA2T00109485001,GSBRNA2T00109484001
GO:BP	glucose 6-phosphate metabolic process	GO:0051156	0.200187	0.698565	43	81	1	80927	GSBRNA2T00146034001
GO:BP	regulation of biosynthetic process	GO:0009889	0.200187	0.698565	3470	81	7	80927	GSBRNA2T00009752001,GSBRNA2T00036858001,GSBRNA2T00078837001,GSBRNA2T00086813001,GSBRNA2T00146197001,GSBRNA2T00146222001,GSBRNA2T00109484001
GO:BP	embryo development ending in seed dormancy	GO:0009793	0.200187	0.698565	11	81	1	80927	GSBRNA2T00050291001
GO:BP	RNA biosynthetic process	GO:0032774	0.200187	0.698565	3729	81	8	80927	GSBRNA2T00009752001,GSBRNA2T00126797001,GSBRNA2T00036858001,GSBRNA2T00078837001,GSBRNA2T00086813001,GSBRNA2T00146197001,GSBRNA2T00146222001,GSBRNA2T00109484001
GO:BP	embryo development	GO:0009790	0.200187	0.698565	11	81	1	80927	GSBRNA2T00050291001
GO:BP	tRNA thio-modification	GO:0034227	0.200187	0.698565	14	81	1	80927	GSBRNA2T00146638001
GO:BP	fruit development	GO:0010154	0.200187	0.698565	26	81	1	80927	GSBRNA2T00050291001
GO:BP	mitochondrial ATP synthesis coupled electron transport	GO:0042775	0.200187	0.698565	26	81	1	80927	GSBRNA2T00130856001
GO:BP	metabolic process	GO:0008152	0.200187	0.698565	22188	81	30	80927	GSBRNA2T00130859001,GSBRNA2T00130856001,GSBRNA2T00009752001,GSBRNA2T00126797001,GSBRNA2T00036858001,GSBRNA2T00078837001,GSBRNA2T00086813001,GSBRNA2T00148671001,GSBRNA2T00018263001,GSBRNA2T00009601001,GSBRNA2T00021360001,GSBRNA2T00146639001,GSBRNA2T00146638001,GSBRNA2T00135033001,GSBRNA2T00134859001,GSBRNA2T00073600001,GSBRNA2T00146197001,GSBRNA2T00146042001,GSBRNA2T00146102001,GSBRNA2T00146034001…
GO:BP	regulation of cellular macromolecule biosynthetic process	GO:2000112	0.200187	0.698565	3432	81	7	80927	GSBRNA2T00009752001,GSBRNA2T00036858001,GSBRNA2T00078837001,GSBRNA2T00086813001,GSBRNA2T00146197001,GSBRNA2T00146222001,GSBRNA2T00109484001
GO:BP	regulation of transcription, DNA-templated	GO:0006355	0.200187	0.698565	3339	81	7	80927	GSBRNA2T00009752001,GSBRNA2T00036858001,GSBRNA2T00078837001,GSBRNA2T00086813001,GSBRNA2T00146197001,GSBRNA2T00146222001,GSBRNA2T00109484001
GO:BP	oxidative phosphorylation	GO:0006119	0.200187	0.698565	39	81	1	80927	GSBRNA2T00130856001
GO:BP	regulation of nucleic acid-templated transcription	GO:1903506	0.200187	0.698565	3361	81	7	80927	GSBRNA2T00009752001,GSBRNA2T00036858001,GSBRNA2T00078837001,GSBRNA2T00086813001,GSBRNA2T00146197001,GSBRNA2T00146222001,GSBRNA2T00109484001
GO:BP	pentose-phosphate shunt	GO:0006098	0.200187	0.698565	43	81	1	80927	GSBRNA2T00146034001
GO:BP	cellular biosynthetic process	GO:0044249	0.200187	0.698565	7791	81	13	80927	GSBRNA2T00130859001,GSBRNA2T00009752001,GSBRNA2T00126797001,GSBRNA2T00036858001,GSBRNA2T00078837001,GSBRNA2T00086813001,GSBRNA2T00146197001,GSBRNA2T00146222001,GSBRNA2T00146090001,GSBRNA2T00143128001,GSBRNA2T00109460001,GSBRNA2T00109485001,GSBRNA2T00109484001
GO:BP	seed development	GO:0048316	0.200187	0.698565	25	81	1	80927	GSBRNA2T00050291001
GO:BP	alpha-amino acid catabolic process	GO:1901606	0.200187	0.698565	61	81	1	80927	GSBRNA2T00130859001
GO:BP	organic substance biosynthetic process	GO:1901576	0.200187	0.698565	7960	81	13	80927	GSBRNA2T00130859001,GSBRNA2T00009752001,GSBRNA2T00126797001,GSBRNA2T00036858001,GSBRNA2T00078837001,GSBRNA2T00086813001,GSBRNA2T00146197001,GSBRNA2T00146222001,GSBRNA2T00146090001,GSBRNA2T00143128001,GSBRNA2T00109460001,GSBRNA2T00109485001,GSBRNA2T00109484001
GO:BP	regulation of RNA biosynthetic process	GO:2001141	0.200187	0.698565	3361	81	7	80927	GSBRNA2T00009752001,GSBRNA2T00036858001,GSBRNA2T00078837001,GSBRNA2T00086813001,GSBRNA2T00146197001,GSBRNA2T00146222001,GSBRNA2T00109484001
GO:BP	arginine metabolic process	GO:0006525	0.200187	0.698565	37	81	1	80927	GSBRNA2T00130859001
GO:BP	transcription, DNA-templated	GO:0006351	0.200187	0.698565	3691	81	8	80927	GSBRNA2T00009752001,GSBRNA2T00126797001,GSBRNA2T00036858001,GSBRNA2T00078837001,GSBRNA2T00086813001,GSBRNA2T00146197001,GSBRNA2T00146222001,GSBRNA2T00109484001
GO:BP	polyamine metabolic process	GO:0006595	0.200187	0.698565	52	81	1	80927	GSBRNA2T00130859001
GO:BP	arginine catabolic process	GO:0006527	0.200187	0.698565	9	81	1	80927	GSBRNA2T00130859001
GO:BP	mitochondrial electron transport, NADH to ubiquinone	GO:0006120	0.200187	0.698565	11	81	1	80927	GSBRNA2T00130856001
GO:BP	glutathione biosynthetic process	GO:0006750	0.200187	0.698565	14	81	1	80927	GSBRNA2T00109460001
GO:BP	polyamine biosynthetic process	GO:0006596	0.200187	0.698565	51	81	1	80927	GSBRNA2T00130859001
GO:BP	glutathione metabolic process	GO:0006749	0.200187	0.698565	54	81	1	80927	GSBRNA2T00109460001
GO:BP	cellular nitrogen compound biosynthetic process	GO:0044271	0.200187	0.698565	6045	81	13	80927	GSBRNA2T00130859001,GSBRNA2T00009752001,GSBRNA2T00126797001,GSBRNA2T00036858001,GSBRNA2T00078837001,GSBRNA2T00086813001,GSBRNA2T00146197001,GSBRNA2T00146222001,GSBRNA2T00146090001,GSBRNA2T00143128001,GSBRNA2T00109460001,GSBRNA2T00109485001,GSBRNA2T00109484001
GO:BP	tRNA wobble uridine modification	GO:0002098	0.200187	0.698565	22	81	1	80927	GSBRNA2T00146638001
GO:BP	NADP metabolic process	GO:0006739	0.200187	0.698565	55	81	1	80927	GSBRNA2T00146034001
GO:BP	NADPH regeneration	GO:0006740	0.200187	0.698565	43	81	1	80927	GSBRNA2T00146034001
GO:BP	tRNA wobble base modification	GO:0002097	0.200187	0.698565	23	81	1	80927	GSBRNA2T00146638001
GO:BP	cell communication	GO:0007154	0.202719	0.693106	1476	81	4	80927	GSBRNA2T00086813001,GSBRNA2T00148671001,GSBRNA2T00146028001,GSBRNA2T00146153001
GO:BP	cellular amino acid catabolic process	GO:0009063	0.206087	0.685949	65	81	1	80927	GSBRNA2T00130859001
GO:BP	regulation of biological process	GO:0050789	0.206087	0.685949	5805	81	10	80927	GSBRNA2T00009752001,GSBRNA2T00036858001,GSBRNA2T00078837001,GSBRNA2T00086813001,GSBRNA2T00148671001,GSBRNA2T00146197001,GSBRNA2T00146028001,GSBRNA2T00146222001,GSBRNA2T00146153001,GSBRNA2T00109484001
GO:BP	RNA metabolic process	GO:0016070	0.206763	0.684527	5050	81	9	80927	GSBRNA2T00009752001,GSBRNA2T00126797001,GSBRNA2T00036858001,GSBRNA2T00078837001,GSBRNA2T00086813001,GSBRNA2T00146638001,GSBRNA2T00146197001,GSBRNA2T00146222001,GSBRNA2T00109484001
GO:BP	biosynthetic process	GO:0009058	0.209194	0.67945	8269	81	13	80927	GSBRNA2T00130859001,GSBRNA2T00009752001,GSBRNA2T00126797001,GSBRNA2T00036858001,GSBRNA2T00078837001,GSBRNA2T00086813001,GSBRNA2T00146197001,GSBRNA2T00146222001,GSBRNA2T00146090001,GSBRNA2T00143128001,GSBRNA2T00109460001,GSBRNA2T00109485001,GSBRNA2T00109484001
GO:BP	oxidation-reduction process	GO:0055114	0.212418	0.67281	3602	81	7	80927	GSBRNA2T00130856001,GSBRNA2T00018263001,GSBRNA2T00146639001,GSBRNA2T00135033001,GSBRNA2T00146102001,GSBRNA2T00146034001,GSBRNA2T00043435001
GO:BP	regulation of nitrogen compound metabolic process	GO:0051171	0.212587	0.672463	3675	81	7	80927	GSBRNA2T00009752001,GSBRNA2T00036858001,GSBRNA2T00078837001,GSBRNA2T00086813001,GSBRNA2T00146197001,GSBRNA2T00146222001,GSBRNA2T00109484001
GO:BP	heterocycle biosynthetic process	GO:0018130	0.212587	0.672463	4459	81	8	80927	GSBRNA2T00009752001,GSBRNA2T00126797001,GSBRNA2T00036858001,GSBRNA2T00078837001,GSBRNA2T00086813001,GSBRNA2T00146197001,GSBRNA2T00146222001,GSBRNA2T00109484001
GO:BP	carboxylic acid catabolic process	GO:0046395	0.212587	0.672463	86	81	1	80927	GSBRNA2T00130859001
GO:BP	protein modification by small protein conjugation	GO:0032446	0.212587	0.672463	452	81	2	80927	GSBRNA2T00146638001,GSBRNA2T00134859001
GO:BP	aromatic compound biosynthetic process	GO:0019438	0.212587	0.672463	4431	81	8	80927	GSBRNA2T00009752001,GSBRNA2T00126797001,GSBRNA2T00036858001,GSBRNA2T00078837001,GSBRNA2T00086813001,GSBRNA2T00146197001,GSBRNA2T00146222001,GSBRNA2T00109484001
GO:BP	organic acid catabolic process	GO:0016054	0.212587	0.672463	86	81	1	80927	GSBRNA2T00130859001
GO:BP	xyloglucan metabolic process	GO:0010411	0.212587	0.672463	76	81	1	80927	GSBRNA2T00073600001
GO:BP	regulation of gene expression	GO:0010468	0.212587	0.672463	3654	81	7	80927	GSBRNA2T00009752001,GSBRNA2T00036858001,GSBRNA2T00078837001,GSBRNA2T00086813001,GSBRNA2T00146197001,GSBRNA2T00146222001,GSBRNA2T00109484001
GO:BP	peptide biosynthetic process	GO:0043043	0.212587	0.672463	1611	81	4	80927	GSBRNA2T00146090001,GSBRNA2T00143128001,GSBRNA2T00109460001,GSBRNA2T00109485001
GO:BP	regulation of cellular metabolic process	GO:0031323	0.212587	0.672463	3760	81	7	80927	GSBRNA2T00009752001,GSBRNA2T00036858001,GSBRNA2T00078837001,GSBRNA2T00086813001,GSBRNA2T00146197001,GSBRNA2T00146222001,GSBRNA2T00109484001
GO:BP	cellular metabolic process	GO:0044237	0.212587	0.672463	16367	81	22	80927	GSBRNA2T00130859001,GSBRNA2T00130856001,GSBRNA2T00009752001,GSBRNA2T00126797001,GSBRNA2T00036858001,GSBRNA2T00078837001,GSBRNA2T00086813001,GSBRNA2T00148671001,GSBRNA2T00021360001,GSBRNA2T00146638001,GSBRNA2T00134859001,GSBRNA2T00073600001,GSBRNA2T00146197001,GSBRNA2T00146102001,GSBRNA2T00146034001,GSBRNA2T00146086001,GSBRNA2T00146222001,GSBRNA2T00146090001,GSBRNA2T00143128001,GSBRNA2T00109460001…
GO:BP	biological_process	GO:0008150	0.212587	0.672463	30273	81	37	80927	GSBRNA2T00087845001,GSBRNA2T00130859001,GSBRNA2T00130856001,GSBRNA2T00009752001,GSBRNA2T00126797001,GSBRNA2T00036858001,GSBRNA2T00078837001,GSBRNA2T00086813001,GSBRNA2T00148671001,GSBRNA2T00018263001,GSBRNA2T00009601001,GSBRNA2T00000130001,GSBRNA2T00021360001,GSBRNA2T00146639001,GSBRNA2T00146638001,GSBRNA2T00135033001,GSBRNA2T00134859001,GSBRNA2T00073600001,GSBRNA2T00146197001,GSBRNA2T00146042001…
GO:BP	regulation of primary metabolic process	GO:0080090	0.212587	0.672463	3691	81	7	80927	GSBRNA2T00009752001,GSBRNA2T00036858001,GSBRNA2T00078837001,GSBRNA2T00086813001,GSBRNA2T00146197001,GSBRNA2T00146222001,GSBRNA2T00109484001
GO:BP	organic cyclic compound biosynthetic process	GO:1901362	0.217843	0.661857	4570	81	8	80927	GSBRNA2T00009752001,GSBRNA2T00126797001,GSBRNA2T00036858001,GSBRNA2T00078837001,GSBRNA2T00086813001,GSBRNA2T00146197001,GSBRNA2T00146222001,GSBRNA2T00109484001
GO:BP	cellular biogenic amine biosynthetic process	GO:0042401	0.217843	0.661857	94	81	1	80927	GSBRNA2T00130859001
GO:BP	amine biosynthetic process	GO:0009309	0.217843	0.661857	94	81	1	80927	GSBRNA2T00130859001
GO:BP	peptide metabolic process	GO:0006518	0.217843	0.661857	1690	81	4	80927	GSBRNA2T00146090001,GSBRNA2T00143128001,GSBRNA2T00109460001,GSBRNA2T00109485001
GO:BP	amide biosynthetic process	GO:0043604	0.217843	0.661857	1690	81	4	80927	GSBRNA2T00146090001,GSBRNA2T00143128001,GSBRNA2T00109460001,GSBRNA2T00109485001
GO:BP	nitrogen compound metabolic process	GO:0006807	0.227909	0.642238	14991	81	20	80927	GSBRNA2T00130859001,GSBRNA2T00009752001,GSBRNA2T00126797001,GSBRNA2T00036858001,GSBRNA2T00078837001,GSBRNA2T00086813001,GSBRNA2T00148671001,GSBRNA2T00021360001,GSBRNA2T00146638001,GSBRNA2T00134859001,GSBRNA2T00146197001,GSBRNA2T00146042001,GSBRNA2T00146086001,GSBRNA2T00146222001,GSBRNA2T00146090001,GSBRNA2T00143128001,GSBRNA2T00109460001,GSBRNA2T00109485001,GSBRNA2T00109484001,GSBRNA2T00109462001
GO:BP	nucleic acid metabolic process	GO:0090304	0.227909	0.642238	5577	81	9	80927	GSBRNA2T00009752001,GSBRNA2T00126797001,GSBRNA2T00036858001,GSBRNA2T00078837001,GSBRNA2T00086813001,GSBRNA2T00146638001,GSBRNA2T00146197001,GSBRNA2T00146222001,GSBRNA2T00109484001
GO:BP	regulation of macromolecule metabolic process	GO:0060255	0.227909	0.642238	3989	81	7	80927	GSBRNA2T00009752001,GSBRNA2T00036858001,GSBRNA2T00078837001,GSBRNA2T00086813001,GSBRNA2T00146197001,GSBRNA2T00146222001,GSBRNA2T00109484001
GO:BP	regulation of metabolic process	GO:0019222	0.227909	0.642238	4035	81	7	80927	GSBRNA2T00009752001,GSBRNA2T00036858001,GSBRNA2T00078837001,GSBRNA2T00086813001,GSBRNA2T00146197001,GSBRNA2T00146222001,GSBRNA2T00109484001
GO:BP	cellular biogenic amine metabolic process	GO:0006576	0.227909	0.642238	116	81	1	80927	GSBRNA2T00130859001
GO:BP	reproductive system development	GO:0061458	0.227909	0.642238	117	81	1	80927	GSBRNA2T00050291001
GO:BP	reproductive structure development	GO:0048608	0.227909	0.642238	117	81	1	80927	GSBRNA2T00050291001
GO:BP	cellular macromolecule metabolic process	GO:0044260	0.227909	0.642238	11385	81	16	80927	GSBRNA2T00009752001,GSBRNA2T00126797001,GSBRNA2T00036858001,GSBRNA2T00078837001,GSBRNA2T00086813001,GSBRNA2T00148671001,GSBRNA2T00146638001,GSBRNA2T00134859001,GSBRNA2T00073600001,GSBRNA2T00146197001,GSBRNA2T00146086001,GSBRNA2T00146222001,GSBRNA2T00146090001,GSBRNA2T00143128001,GSBRNA2T00109485001,GSBRNA2T00109484001
GO:BP	cellular amine metabolic process	GO:0044106	0.227909	0.642238	116	81	1	80927	GSBRNA2T00130859001
GO:BP	hemicellulose metabolic process	GO:0010410	0.227909	0.642238	114	81	1	80927	GSBRNA2T00073600001
GO:BP	cell wall polysaccharide metabolic process	GO:0010383	0.227909	0.642238	115	81	1	80927	GSBRNA2T00073600001
GO:BP	organic substance metabolic process	GO:0071704	0.227909	0.642238	18575	81	24	80927	GSBRNA2T00130859001,GSBRNA2T00009752001,GSBRNA2T00126797001,GSBRNA2T00036858001,GSBRNA2T00078837001,GSBRNA2T00086813001,GSBRNA2T00148671001,GSBRNA2T00009601001,GSBRNA2T00021360001,GSBRNA2T00146638001,GSBRNA2T00134859001,GSBRNA2T00073600001,GSBRNA2T00146197001,GSBRNA2T00146042001,GSBRNA2T00146034001,GSBRNA2T00146086001,GSBRNA2T00146222001,GSBRNA2T00146090001,GSBRNA2T00143128001,GSBRNA2T00109460001…
GO:BP	tRNA modification	GO:0006400	0.227909	0.642238	109	81	1	80927	GSBRNA2T00146638001
GO:BP	primary metabolic process	GO:0044238	0.227909	0.642238	17680	81	23	80927	GSBRNA2T00130859001,GSBRNA2T00009752001,GSBRNA2T00126797001,GSBRNA2T00036858001,GSBRNA2T00078837001,GSBRNA2T00086813001,GSBRNA2T00148671001,GSBRNA2T00009601001,GSBRNA2T00021360001,GSBRNA2T00146638001,GSBRNA2T00134859001,GSBRNA2T00073600001,GSBRNA2T00146197001,GSBRNA2T00146042001,GSBRNA2T00146034001,GSBRNA2T00146086001,GSBRNA2T00146222001,GSBRNA2T00146090001,GSBRNA2T00143128001,GSBRNA2T00109485001…
GO:BP	biological regulation	GO:0065007	0.227909	0.642238	6342	81	10	80927	GSBRNA2T00009752001,GSBRNA2T00036858001,GSBRNA2T00078837001,GSBRNA2T00086813001,GSBRNA2T00148671001,GSBRNA2T00146197001,GSBRNA2T00146028001,GSBRNA2T00146222001,GSBRNA2T00146153001,GSBRNA2T00109484001
GO:BP	cellular amide metabolic process	GO:0043603	0.233534	0.63165	1848	81	4	80927	GSBRNA2T00146090001,GSBRNA2T00143128001,GSBRNA2T00109460001,GSBRNA2T00109485001
GO:BP	protein modification by small protein conjugation or removal	GO:0070647	0.234162	0.630483	583	81	2	80927	GSBRNA2T00146638001,GSBRNA2T00134859001
GO:BP	cellular modified amino acid metabolic process	GO:0006575	0.236723	0.62576	127	81	1	80927	GSBRNA2T00109460001
GO:BP	developmental process involved in reproduction	GO:0003006	0.236723	0.62576	126	81	1	80927	GSBRNA2T00050291001
GO:BP	cellular response to stimulus	GO:0051716	0.244477	0.611762	1908	81	4	80927	GSBRNA2T00086813001,GSBRNA2T00148671001,GSBRNA2T00146028001,GSBRNA2T00146153001
GO:BP	small molecule catabolic process	GO:0044282	0.262963	0.580105	148	81	1	80927	GSBRNA2T00130859001
GO:BP	phosphorelay signal transduction system	GO:0000160	0.262963	0.580105	146	81	1	80927	GSBRNA2T00146028001
GO:BP	glutamine family amino acid metabolic process	GO:0009064	0.262963	0.580105	147	81	1	80927	GSBRNA2T00130859001
GO:BP	cellular respiration	GO:0045333	0.263817	0.578698	150	81	1	80927	GSBRNA2T00130856001
GO:BP	post-embryonic development	GO:0009791	0.279104	0.554234	161	81	1	80927	GSBRNA2T00050291001
GO:BP	cellular process	GO:0009987	0.281953	0.549823	23307	81	28	80927	GSBRNA2T00087845001,GSBRNA2T00130859001,GSBRNA2T00130856001,GSBRNA2T00009752001,GSBRNA2T00126797001,GSBRNA2T00036858001,GSBRNA2T00078837001,GSBRNA2T00086813001,GSBRNA2T00148671001,GSBRNA2T00000130001,GSBRNA2T00021360001,GSBRNA2T00146638001,GSBRNA2T00134859001,GSBRNA2T00073600001,GSBRNA2T00146197001,GSBRNA2T00146102001,GSBRNA2T00146028001,GSBRNA2T00146034001,GSBRNA2T00146086001,GSBRNA2T00146222001…
GO:BP	cell wall macromolecule metabolic process	GO:0044036	0.281953	0.549823	166	81	1	80927	GSBRNA2T00073600001
GO:BP	sulfur compound biosynthetic process	GO:0044272	0.284664	0.545668	171	81	1	80927	GSBRNA2T00109460001
GO:BP	energy derivation by oxidation of organic compounds	GO:0015980	0.284664	0.545668	170	81	1	80927	GSBRNA2T00130856001
GO:BP	amine metabolic process	GO:0009308	0.285214	0.544828	173	81	1	80927	GSBRNA2T00130859001
GO:BP	macromolecule metabolic process	GO:0043170	0.288698	0.539556	14154	81	18	80927	GSBRNA2T00009752001,GSBRNA2T00126797001,GSBRNA2T00036858001,GSBRNA2T00078837001,GSBRNA2T00086813001,GSBRNA2T00148671001,GSBRNA2T00146638001,GSBRNA2T00134859001,GSBRNA2T00073600001,GSBRNA2T00146197001,GSBRNA2T00146042001,GSBRNA2T00146086001,GSBRNA2T00146222001,GSBRNA2T00146090001,GSBRNA2T00143128001,GSBRNA2T00109485001,GSBRNA2T00109484001,GSBRNA2T00109462001
GO:BP	cell wall biogenesis	GO:0042546	0.288698	0.539556	177	81	1	80927	GSBRNA2T00073600001
GO:BP	carbohydrate metabolic process	GO:0005975	0.28931	0.538636	2155	81	4	80927	GSBRNA2T00009601001,GSBRNA2T00073600001,GSBRNA2T00146034001,GSBRNA2T00109516001
GO:BP	auxin-activated signaling pathway	GO:0009734	0.28931	0.538636	185	81	1	80927	GSBRNA2T00086813001
GO:BP	tRNA processing	GO:0008033	0.28931	0.538636	181	81	1	80927	GSBRNA2T00146638001
GO:BP	cellular response to auxin stimulus	GO:0071365	0.28931	0.538636	185	81	1	80927	GSBRNA2T00086813001
GO:BP	system development	GO:0048731	0.290588	0.536722	191	81	1	80927	GSBRNA2T00050291001
GO:BP	generation of precursor metabolites and energy	GO:0006091	0.290588	0.536722	755	81	2	80927	GSBRNA2T00130856001,GSBRNA2T00146034001
GO:BP	nucleobase-containing compound metabolic process	GO:0006139	0.290588	0.536722	6262	81	9	80927	GSBRNA2T00009752001,GSBRNA2T00126797001,GSBRNA2T00036858001,GSBRNA2T00078837001,GSBRNA2T00086813001,GSBRNA2T00146638001,GSBRNA2T00146197001,GSBRNA2T00146222001,GSBRNA2T00109484001
GO:BP	response to stimulus	GO:0050896	0.290866	0.536306	2968	81	5	80927	GSBRNA2T00086813001,GSBRNA2T00148671001,GSBRNA2T00146028001,GSBRNA2T00146153001,GSBRNA2T00015759001
GO:BP	organonitrogen compound biosynthetic process	GO:1901566	0.293502	0.532389	2986	81	5	80927	GSBRNA2T00130859001,GSBRNA2T00146090001,GSBRNA2T00143128001,GSBRNA2T00109460001,GSBRNA2T00109485001
GO:BP	RNA modification	GO:0009451	0.331373	0.479683	238	81	1	80927	GSBRNA2T00146638001
GO:BP	cellular response to endogenous stimulus	GO:0071495	0.331373	0.479683	233	81	1	80927	GSBRNA2T00086813001
GO:BP	cellular amino acid metabolic process	GO:0006520	0.331373	0.479683	853	81	2	80927	GSBRNA2T00130859001,GSBRNA2T00021360001
GO:BP	cellular response to hormone stimulus	GO:0032870	0.331373	0.479683	232	81	1	80927	GSBRNA2T00086813001
GO:BP	hormone-mediated signaling pathway	GO:0009755	0.331373	0.479683	232	81	1	80927	GSBRNA2T00086813001
GO:BP	translation	GO:0006412	0.331373	0.479683	1585	81	3	80927	GSBRNA2T00146090001,GSBRNA2T00143128001,GSBRNA2T00109485001
GO:BP	reactive oxygen species metabolic process	GO:0072593	0.332552	0.478141	241	81	1	80927	GSBRNA2T00146102001
GO:BP	cellular response to organic substance	GO:0071310	0.336118	0.473508	246	81	1	80927	GSBRNA2T00086813001
GO:BP	heterocycle metabolic process	GO:0046483	0.337091	0.472253	6658	81	9	80927	GSBRNA2T00009752001,GSBRNA2T00126797001,GSBRNA2T00036858001,GSBRNA2T00078837001,GSBRNA2T00086813001,GSBRNA2T00146638001,GSBRNA2T00146197001,GSBRNA2T00146222001,GSBRNA2T00109484001
GO:BP	cellular glucan metabolic process	GO:0006073	0.339331	0.469376	255	81	1	80927	GSBRNA2T00073600001
GO:BP	glucan metabolic process	GO:0044042	0.339331	0.469376	255	81	1	80927	GSBRNA2T00073600001
GO:BP	cellular aromatic compound metabolic process	GO:0006725	0.339407	0.469279	6709	81	9	80927	GSBRNA2T00009752001,GSBRNA2T00126797001,GSBRNA2T00036858001,GSBRNA2T00078837001,GSBRNA2T00086813001,GSBRNA2T00146638001,GSBRNA2T00146197001,GSBRNA2T00146222001,GSBRNA2T00109484001
GO:BP	organic cyclic compound metabolic process	GO:1901360	0.352203	0.453206	6789	81	9	80927	GSBRNA2T00009752001,GSBRNA2T00126797001,GSBRNA2T00036858001,GSBRNA2T00078837001,GSBRNA2T00086813001,GSBRNA2T00146638001,GSBRNA2T00146197001,GSBRNA2T00146222001,GSBRNA2T00109484001
GO:BP	response to abiotic stimulus	GO:0009628	0.365891	0.436648	285	81	1	80927	GSBRNA2T00015759001
GO:BP	cellular polysaccharide metabolic process	GO:0044264	0.372264	0.429149	294	81	1	80927	GSBRNA2T00073600001
GO:BP	ATP metabolic process	GO:0046034	0.372264	0.429149	296	81	1	80927	GSBRNA2T00130856001
GO:BP	protein folding	GO:0006457	0.372264	0.429149	298	81	1	80927	GSBRNA2T00015759001
GO:BP	organonitrogen compound metabolic process	GO:1901564	0.375597	0.425278	9713	81	12	80927	GSBRNA2T00130859001,GSBRNA2T00148671001,GSBRNA2T00021360001,GSBRNA2T00146638001,GSBRNA2T00134859001,GSBRNA2T00146042001,GSBRNA2T00146086001,GSBRNA2T00146090001,GSBRNA2T00143128001,GSBRNA2T00109460001,GSBRNA2T00109485001,GSBRNA2T00109462001
GO:BP	proton transmembrane transport	GO:1902600	0.376617	0.4241	307	81	1	80927	GSBRNA2T00087845001
GO:BP	sulfur compound metabolic process	GO:0006790	0.379743	0.420511	315	81	1	80927	GSBRNA2T00109460001
GO:BP	multicellular organism development	GO:0007275	0.379743	0.420511	313	81	1	80927	GSBRNA2T00050291001
GO:BP	ncRNA processing	GO:0034470	0.40137	0.396455	339	81	1	80927	GSBRNA2T00146638001
GO:BP	electron transport chain	GO:0022900	0.40164	0.396163	342	81	1	80927	GSBRNA2T00130856001
GO:BP	reproduction	GO:0000003	0.415701	0.381219	365	81	1	80927	GSBRNA2T00050291001
GO:BP	reproductive process	GO:0022414	0.415701	0.381219	365	81	1	80927	GSBRNA2T00050291001
GO:BP	intracellular signal transduction	GO:0035556	0.415701	0.381219	363	81	1	80927	GSBRNA2T00146028001
GO:BP	tRNA metabolic process	GO:0006399	0.426964	0.369609	380	81	1	80927	GSBRNA2T00146638001
GO:BP	anatomical structure development	GO:0048856	0.431515	0.365004	388	81	1	80927	GSBRNA2T00050291001
GO:BP	protein ubiquitination	GO:0016567	0.4511	0.345728	413	81	1	80927	GSBRNA2T00134859001
GO:BP	response to auxin	GO:0009733	0.460917	0.336377	431	81	1	80927	GSBRNA2T00086813001
GO:BP	monovalent inorganic cation transport	GO:0015672	0.460917	0.336377	430	81	1	80927	GSBRNA2T00087845001
GO:BP	cellular response to chemical stimulus	GO:0070887	0.48177	0.31716	462	81	1	80927	GSBRNA2T00086813001
GO:BP	developmental process	GO:0032502	0.48177	0.31716	463	81	1	80927	GSBRNA2T00050291001
GO:BP	cellular carbohydrate metabolic process	GO:0044262	0.491021	0.3089	482	81	1	80927	GSBRNA2T00073600001
GO:BP	alpha-amino acid metabolic process	GO:1901605	0.491021	0.3089	480	81	1	80927	GSBRNA2T00130859001
GO:BP	response to hormone	GO:0009725	0.507424	0.294629	510	81	1	80927	GSBRNA2T00086813001
GO:BP	response to endogenous stimulus	GO:0009719	0.507424	0.294629	511	81	1	80927	GSBRNA2T00086813001
GO:BP	protein metabolic process	GO:0019538	0.513521	0.289442	8003	81	9	80927	GSBRNA2T00148671001,GSBRNA2T00146638001,GSBRNA2T00134859001,GSBRNA2T00146042001,GSBRNA2T00146086001,GSBRNA2T00146090001,GSBRNA2T00143128001,GSBRNA2T00109485001,GSBRNA2T00109462001
GO:BP	multicellular organismal process	GO:0032501	0.515273	0.287963	534	81	1	80927	GSBRNA2T00050291001
GO:BP	inorganic cation transmembrane transport	GO:0098662	0.515273	0.287963	531	81	1	80927	GSBRNA2T00087845001
GO:BP	ncRNA metabolic process	GO:0034660	0.515615	0.287675	543	81	1	80927	GSBRNA2T00146638001
GO:BP	response to organic substance	GO:0010033	0.515615	0.287675	541	81	1	80927	GSBRNA2T00086813001
GO:BP	cation transmembrane transport	GO:0098655	0.51965	0.284289	553	81	1	80927	GSBRNA2T00087845001
GO:BP	carboxylic acid metabolic process	GO:0019752	0.521006	0.283157	1458	81	2	80927	GSBRNA2T00130859001,GSBRNA2T00021360001
GO:BP	organic acid metabolic process	GO:0006082	0.5213	0.282912	1474	81	2	80927	GSBRNA2T00130859001,GSBRNA2T00021360001
GO:BP	oxoacid metabolic process	GO:0043436	0.5213	0.282912	1470	81	2	80927	GSBRNA2T00130859001,GSBRNA2T00021360001
GO:BP	transmembrane transport	GO:0055085	0.5213	0.282912	2420	81	3	80927	GSBRNA2T00087845001,GSBRNA2T00000130001,GSBRNA2T00146213001
GO:BP	inorganic ion transmembrane transport	GO:0098660	0.521627	0.28264	578	81	1	80927	GSBRNA2T00087845001
GO:BP	organonitrogen compound catabolic process	GO:1901565	0.540849	0.266924	612	81	1	80927	GSBRNA2T00130859001
GO:BP	polysaccharide metabolic process	GO:0005976	0.554161	0.256364	638	81	1	80927	GSBRNA2T00073600001
GO:BP	external encapsulating structure organization	GO:0045229	0.566114	0.247096	668	81	1	80927	GSBRNA2T00073600001
GO:BP	cell wall organization	GO:0071555	0.566114	0.247096	664	81	1	80927	GSBRNA2T00073600001
GO:BP	ion transmembrane transport	GO:0034220	0.582564	0.234657	713	81	1	80927	GSBRNA2T00087845001
GO:BP	proteolysis	GO:0006508	0.582564	0.234657	1704	81	2	80927	GSBRNA2T00146042001,GSBRNA2T00109462001
GO:BP	cellular protein metabolic process	GO:0044267	0.582564	0.234657	6705	81	7	80927	GSBRNA2T00148671001,GSBRNA2T00146638001,GSBRNA2T00134859001,GSBRNA2T00146086001,GSBRNA2T00146090001,GSBRNA2T00143128001,GSBRNA2T00109485001
GO:BP	cell wall organization or biogenesis	GO:0071554	0.616582	0.210009	782	81	1	80927	GSBRNA2T00073600001
GO:BP	response to chemical	GO:0042221	0.628025	0.202023	811	81	1	80927	GSBRNA2T00086813001
GO:BP	RNA processing	GO:0006396	0.651879	0.185833	867	81	1	80927	GSBRNA2T00146638001
GO:BP	cation transport	GO:0006812	0.66727	0.175698	908	81	1	80927	GSBRNA2T00087845001
GO:BP	organophosphate metabolic process	GO:0019637	0.714112	0.146234	1027	81	1	80927	GSBRNA2T00146034001
GO:BP	cellular component biogenesis	GO:0044085	0.716202	0.144964	1042	81	1	80927	GSBRNA2T00073600001
GO:BP	cellular catabolic process	GO:0044248	0.717415	0.144229	1055	81	1	80927	GSBRNA2T00130859001
GO:BP	phosphorylation	GO:0016310	0.72823	0.137731	3425	81	3	80927	GSBRNA2T00130856001,GSBRNA2T00148671001,GSBRNA2T00146086001
GO:BP	carbohydrate derivative metabolic process	GO:1901135	0.72823	0.137731	1097	81	1	80927	GSBRNA2T00146034001
GO:BP	small molecule metabolic process	GO:0044281	0.742115	0.129529	2361	81	2	80927	GSBRNA2T00130859001,GSBRNA2T00021360001
GO:BP	protein modification process	GO:0036211	0.745981	0.127272	4767	81	4	80927	GSBRNA2T00148671001,GSBRNA2T00146638001,GSBRNA2T00134859001,GSBRNA2T00146086001
GO:BP	cellular protein modification process	GO:0006464	0.745981	0.127272	4767	81	4	80927	GSBRNA2T00148671001,GSBRNA2T00146638001,GSBRNA2T00134859001,GSBRNA2T00146086001
GO:BP	phosphorus metabolic process	GO:0006793	0.745981	0.127272	4739	81	4	80927	GSBRNA2T00130856001,GSBRNA2T00148671001,GSBRNA2T00146034001,GSBRNA2T00146086001
GO:BP	response to stress	GO:0006950	0.745981	0.127272	1202	81	1	80927	GSBRNA2T00015759001
GO:BP	phosphate-containing compound metabolic process	GO:0006796	0.745981	0.127272	4724	81	4	80927	GSBRNA2T00130856001,GSBRNA2T00148671001,GSBRNA2T00146034001,GSBRNA2T00146086001
GO:BP	ion transport	GO:0006811	0.774893	0.110758	1338	81	1	80927	GSBRNA2T00087845001
GO:BP	macromolecule modification	GO:0043412	0.77773	0.109171	5020	81	4	80927	GSBRNA2T00148671001,GSBRNA2T00146638001,GSBRNA2T00134859001,GSBRNA2T00146086001
GO:BP	organic substance catabolic process	GO:1901575	0.780934	0.107386	1390	81	1	80927	GSBRNA2T00130859001
GO:BP	catabolic process	GO:0009056	0.827011	0.0824886	1649	81	1	80927	GSBRNA2T00130859001
GO:BP	establishment of localization	GO:0051234	0.827011	0.0824886	4331	81	3	80927	GSBRNA2T00087845001,GSBRNA2T00000130001,GSBRNA2T00146213001
GO:BP	protein phosphorylation	GO:0006468	0.827011	0.0824886	2976	81	2	80927	GSBRNA2T00148671001,GSBRNA2T00146086001
GO:BP	transport	GO:0006810	0.827011	0.0824886	4306	81	3	80927	GSBRNA2T00087845001,GSBRNA2T00000130001,GSBRNA2T00146213001
GO:BP	localization	GO:0051179	0.827301	0.0823364	4366	81	3	80927	GSBRNA2T00087845001,GSBRNA2T00000130001,GSBRNA2T00146213001
GO:BP	cellular component organization	GO:0016043	0.918257	0.0370356	2411	81	1	80927	GSBRNA2T00073600001
GO:BP	cellular component organization or biogenesis	GO:0071840	0.936134	0.0286621	2701	81	1	80927	GSBRNA2T00073600001
KEGG	Monoterpenoid biosynthesis	KEGG:00902	0.011999	1.92086	3	81	1	80927	GSBRNA2T00077994001
KEGG	Biosynthesis of secondary metabolites	KEGG:01110	0.707777	0.150103	435	81	1	80927	GSBRNA2T00077994001
KEGG	Metabolic pathways	KEGG:01100	0.746848	0.126768	816	81	1	80927	GSBRNA2T00077994001
KEGG	KEGG root term	KEGG:00000	0.825368	0.0833526	1724	81	1	80927	GSBRNA2T00077994001

## Sheet: root_DEGs_harboring_important_r
source	term_name	term_id	adjusted_p_value	negative_log10_of_adjusted_p_value	term_size	query_size	intersection_size	effective_domain_size	intersections
GO:BP	chloride transport	GO:0006821	0.320997	0.4935	25	50	1	80927	GSBRNA2T00121401001
GO:BP	superoxide metabolic process	GO:0006801	0.320997	0.4935	45	50	1	80927	GSBRNA2T00146102001
GO:BP	ATP synthesis coupled electron transport	GO:0042773	0.320997	0.4935	36	50	1	80927	GSBRNA2T00130856001
GO:BP	mitochondrial ATP synthesis coupled electron transport	GO:0042775	0.320997	0.4935	26	50	1	80927	GSBRNA2T00130856001
GO:BP	pentose-phosphate shunt	GO:0006098	0.320997	0.4935	43	50	1	80927	GSBRNA2T00146034001
GO:BP	oxidative phosphorylation	GO:0006119	0.320997	0.4935	39	50	1	80927	GSBRNA2T00130856001
GO:BP	mitochondrial electron transport, NADH to ubiquinone	GO:0006120	0.320997	0.4935	11	50	1	80927	GSBRNA2T00130856001
GO:BP	glucose 6-phosphate metabolic process	GO:0051156	0.320997	0.4935	43	50	1	80927	GSBRNA2T00146034001
GO:BP	respiratory electron transport chain	GO:0022904	0.320997	0.4935	45	50	1	80927	GSBRNA2T00130856001
GO:BP	NADPH regeneration	GO:0006740	0.320997	0.4935	43	50	1	80927	GSBRNA2T00146034001
GO:BP	NADP metabolic process	GO:0006739	0.355589	0.449051	55	50	1	80927	GSBRNA2T00146034001
GO:BP	branched-chain amino acid metabolic process	GO:0009081	0.360863	0.442657	61	50	1	80927	GSBRNA2T00021360001
GO:BP	macromolecule biosynthetic process	GO:0009059	0.467975	0.329778	6130	50	7	80927	GSBRNA2T00126797001,GSBRNA2T00146197001,GSBRNA2T00146222001,GSBRNA2T00146090001,GSBRNA2T00143128001,GSBRNA2T00109485001,GSBRNA2T00109484001
GO:BP	cellular nitrogen compound biosynthetic process	GO:0044271	0.467975	0.329778	6045	50	7	80927	GSBRNA2T00126797001,GSBRNA2T00146197001,GSBRNA2T00146222001,GSBRNA2T00146090001,GSBRNA2T00143128001,GSBRNA2T00109485001,GSBRNA2T00109484001
GO:BP	cellular respiration	GO:0045333	0.467975	0.329778	150	50	1	80927	GSBRNA2T00130856001
GO:BP	inorganic anion transport	GO:0015698	0.467975	0.329778	156	50	1	80927	GSBRNA2T00121401001
GO:BP	peptide biosynthetic process	GO:0043043	0.467975	0.329778	1611	50	3	80927	GSBRNA2T00146090001,GSBRNA2T00143128001,GSBRNA2T00109485001
GO:BP	cellular macromolecule biosynthetic process	GO:0034645	0.467975	0.329778	6037	50	7	80927	GSBRNA2T00126797001,GSBRNA2T00146197001,GSBRNA2T00146222001,GSBRNA2T00146090001,GSBRNA2T00143128001,GSBRNA2T00109485001,GSBRNA2T00109484001
GO:BP	amide biosynthetic process	GO:0043604	0.467975	0.329778	1690	50	3	80927	GSBRNA2T00146090001,GSBRNA2T00143128001,GSBRNA2T00109485001
GO:BP	phosphorelay signal transduction system	GO:0000160	0.467975	0.329778	146	50	1	80927	GSBRNA2T00146028001
GO:BP	translation	GO:0006412	0.467975	0.329778	1585	50	3	80927	GSBRNA2T00146090001,GSBRNA2T00143128001,GSBRNA2T00109485001
GO:BP	generation of precursor metabolites and energy	GO:0006091	0.467975	0.329778	755	50	2	80927	GSBRNA2T00130856001,GSBRNA2T00146034001
GO:BP	peptide metabolic process	GO:0006518	0.467975	0.329778	1690	50	3	80927	GSBRNA2T00146090001,GSBRNA2T00143128001,GSBRNA2T00109485001
GO:BP	gene expression	GO:0010467	0.476974	0.321505	6484	50	7	80927	GSBRNA2T00126797001,GSBRNA2T00146197001,GSBRNA2T00146222001,GSBRNA2T00146090001,GSBRNA2T00143128001,GSBRNA2T00109485001,GSBRNA2T00109484001
GO:BP	energy derivation by oxidation of organic compounds	GO:0015980	0.476974	0.321505	170	50	1	80927	GSBRNA2T00130856001
GO:BP	cellular amide metabolic process	GO:0043603	0.476974	0.321505	1848	50	3	80927	GSBRNA2T00146090001,GSBRNA2T00143128001,GSBRNA2T00109485001
GO:BP	organic cyclic compound biosynthetic process	GO:1901362	0.537663	0.26949	4570	50	4	80927	GSBRNA2T00126797001,GSBRNA2T00146197001,GSBRNA2T00146222001,GSBRNA2T00109484001
GO:BP	organonitrogen compound biosynthetic process	GO:1901566	0.537663	0.26949	2986	50	3	80927	GSBRNA2T00146090001,GSBRNA2T00143128001,GSBRNA2T00109485001
GO:BP	organic substance biosynthetic process	GO:1901576	0.537663	0.26949	7960	50	7	80927	GSBRNA2T00126797001,GSBRNA2T00146197001,GSBRNA2T00146222001,GSBRNA2T00146090001,GSBRNA2T00143128001,GSBRNA2T00109485001,GSBRNA2T00109484001
GO:BP	proton transmembrane transport	GO:1902600	0.537663	0.26949	307	50	1	80927	GSBRNA2T00087845001
GO:BP	intracellular signal transduction	GO:0035556	0.537663	0.26949	363	50	1	80927	GSBRNA2T00146028001
GO:BP	nucleobase-containing compound biosynthetic process	GO:0034654	0.537663	0.26949	4144	50	4	80927	GSBRNA2T00126797001,GSBRNA2T00146197001,GSBRNA2T00146222001,GSBRNA2T00109484001
GO:BP	regulation of nucleic acid-templated transcription	GO:1903506	0.537663	0.26949	3361	50	3	80927	GSBRNA2T00146197001,GSBRNA2T00146222001,GSBRNA2T00109484001
GO:BP	cellular nitrogen compound metabolic process	GO:0034641	0.537663	0.26949	8161	50	7	80927	GSBRNA2T00126797001,GSBRNA2T00146197001,GSBRNA2T00146222001,GSBRNA2T00146090001,GSBRNA2T00143128001,GSBRNA2T00109485001,GSBRNA2T00109484001
GO:BP	ion transmembrane transport	GO:0034220	0.537663	0.26949	713	50	1	80927	GSBRNA2T00087845001
GO:BP	RNA biosynthetic process	GO:0032774	0.537663	0.26949	3729	50	4	80927	GSBRNA2T00126797001,GSBRNA2T00146197001,GSBRNA2T00146222001,GSBRNA2T00109484001
GO:BP	protein modification by small protein conjugation	GO:0032446	0.537663	0.26949	452	50	1	80927	GSBRNA2T00134859001
GO:BP	cellular metabolic process	GO:0044237	0.537663	0.26949	16367	50	13	80927	GSBRNA2T00130856001,GSBRNA2T00126797001,GSBRNA2T00021360001,GSBRNA2T00134859001,GSBRNA2T00146197001,GSBRNA2T00146102001,GSBRNA2T00146034001,GSBRNA2T00146086001,GSBRNA2T00146222001,GSBRNA2T00146090001,GSBRNA2T00143128001,GSBRNA2T00109485001,GSBRNA2T00109484001
GO:BP	primary metabolic process	GO:0044238	0.537663	0.26949	17680	50	13	80927	GSBRNA2T00126797001,GSBRNA2T00126938001,GSBRNA2T00021360001,GSBRNA2T00134859001,GSBRNA2T00146197001,GSBRNA2T00146042001,GSBRNA2T00146034001,GSBRNA2T00146086001,GSBRNA2T00146222001,GSBRNA2T00146090001,GSBRNA2T00143128001,GSBRNA2T00109485001,GSBRNA2T00109484001
GO:BP	protein modification by small protein conjugation or removal	GO:0070647	0.537663	0.26949	583	50	1	80927	GSBRNA2T00134859001
GO:BP	cellular biosynthetic process	GO:0044249	0.537663	0.26949	7791	50	7	80927	GSBRNA2T00126797001,GSBRNA2T00146197001,GSBRNA2T00146222001,GSBRNA2T00146090001,GSBRNA2T00143128001,GSBRNA2T00109485001,GSBRNA2T00109484001
GO:BP	biological regulation	GO:0065007	0.537663	0.26949	6342	50	5	80927	GSBRNA2T00146197001,GSBRNA2T00146028001,GSBRNA2T00146222001,GSBRNA2T00146153001,GSBRNA2T00109484001
GO:BP	reactive oxygen species metabolic process	GO:0072593	0.537663	0.26949	241	50	1	80927	GSBRNA2T00146102001
GO:BP	oxidation-reduction process	GO:0055114	0.537663	0.26949	3602	50	4	80927	GSBRNA2T00130856001,GSBRNA2T00135033001,GSBRNA2T00146102001,GSBRNA2T00146034001
GO:BP	transmembrane transport	GO:0055085	0.537663	0.26949	2420	50	3	80927	GSBRNA2T00087845001,GSBRNA2T00146213001,GSBRNA2T00121401001
GO:BP	cellular response to stimulus	GO:0051716	0.537663	0.26949	1908	50	2	80927	GSBRNA2T00146028001,GSBRNA2T00146153001
GO:BP	regulation of RNA metabolic process	GO:0051252	0.537663	0.26949	3385	50	3	80927	GSBRNA2T00146197001,GSBRNA2T00146222001,GSBRNA2T00109484001
GO:BP	organic substance metabolic process	GO:0071704	0.537663	0.26949	18575	50	13	80927	GSBRNA2T00126797001,GSBRNA2T00126938001,GSBRNA2T00021360001,GSBRNA2T00134859001,GSBRNA2T00146197001,GSBRNA2T00146042001,GSBRNA2T00146034001,GSBRNA2T00146086001,GSBRNA2T00146222001,GSBRNA2T00146090001,GSBRNA2T00143128001,GSBRNA2T00109485001,GSBRNA2T00109484001
GO:BP	nucleic acid-templated transcription	GO:0097659	0.537663	0.26949	3723	50	4	80927	GSBRNA2T00126797001,GSBRNA2T00146197001,GSBRNA2T00146222001,GSBRNA2T00109484001
GO:BP	regulation of biological process	GO:0050789	0.537663	0.26949	5805	50	5	80927	GSBRNA2T00146197001,GSBRNA2T00146028001,GSBRNA2T00146222001,GSBRNA2T00146153001,GSBRNA2T00109484001
GO:BP	ATP metabolic process	GO:0046034	0.537663	0.26949	296	50	1	80927	GSBRNA2T00130856001
GO:BP	cation transmembrane transport	GO:0098655	0.537663	0.26949	553	50	1	80927	GSBRNA2T00087845001
GO:BP	inorganic ion transmembrane transport	GO:0098660	0.537663	0.26949	578	50	1	80927	GSBRNA2T00087845001
GO:BP	inorganic cation transmembrane transport	GO:0098662	0.537663	0.26949	531	50	1	80927	GSBRNA2T00087845001
GO:BP	cellular macromolecule metabolic process	GO:0044260	0.537663	0.26949	11385	50	9	80927	GSBRNA2T00126797001,GSBRNA2T00134859001,GSBRNA2T00146197001,GSBRNA2T00146086001,GSBRNA2T00146222001,GSBRNA2T00146090001,GSBRNA2T00143128001,GSBRNA2T00109485001,GSBRNA2T00109484001
GO:BP	regulation of cellular process	GO:0050794	0.537663	0.26949	5382	50	5	80927	GSBRNA2T00146197001,GSBRNA2T00146028001,GSBRNA2T00146222001,GSBRNA2T00146153001,GSBRNA2T00109484001
GO:BP	regulation of cellular macromolecule biosynthetic process	GO:2000112	0.537663	0.26949	3432	50	3	80927	GSBRNA2T00146197001,GSBRNA2T00146222001,GSBRNA2T00109484001
GO:BP	regulation of cellular biosynthetic process	GO:0031326	0.537663	0.26949	3470	50	3	80927	GSBRNA2T00146197001,GSBRNA2T00146222001,GSBRNA2T00109484001
GO:BP	signaling	GO:0023052	0.537663	0.26949	1276	50	2	80927	GSBRNA2T00146028001,GSBRNA2T00146153001
GO:BP	transcription, DNA-templated	GO:0006351	0.537663	0.26949	3691	50	4	80927	GSBRNA2T00126797001,GSBRNA2T00146197001,GSBRNA2T00146222001,GSBRNA2T00109484001
GO:BP	regulation of transcription, DNA-templated	GO:0006355	0.537663	0.26949	3339	50	3	80927	GSBRNA2T00146197001,GSBRNA2T00146222001,GSBRNA2T00109484001
GO:BP	nitrogen compound metabolic process	GO:0006807	0.537663	0.26949	14991	50	11	80927	GSBRNA2T00126797001,GSBRNA2T00021360001,GSBRNA2T00134859001,GSBRNA2T00146197001,GSBRNA2T00146042001,GSBRNA2T00146086001,GSBRNA2T00146222001,GSBRNA2T00146090001,GSBRNA2T00143128001,GSBRNA2T00109485001,GSBRNA2T00109484001
GO:BP	ion transport	GO:0006811	0.537663	0.26949	1338	50	2	80927	GSBRNA2T00087845001,GSBRNA2T00121401001
GO:BP	anion transport	GO:0006820	0.537663	0.26949	338	50	1	80927	GSBRNA2T00121401001
GO:BP	cell communication	GO:0007154	0.537663	0.26949	1476	50	2	80927	GSBRNA2T00146028001,GSBRNA2T00146153001
GO:BP	signal transduction	GO:0007165	0.537663	0.26949	1262	50	2	80927	GSBRNA2T00146028001,GSBRNA2T00146153001
GO:BP	biological_process	GO:0008150	0.537663	0.26949	30273	50	21	80927	GSBRNA2T00087845001,GSBRNA2T00130856001,GSBRNA2T00126797001,GSBRNA2T00126938001,GSBRNA2T00021360001,GSBRNA2T00135033001,GSBRNA2T00134859001,GSBRNA2T00146197001,GSBRNA2T00146042001,GSBRNA2T00146102001,GSBRNA2T00146028001,GSBRNA2T00146034001,GSBRNA2T00146086001,GSBRNA2T00146222001,GSBRNA2T00146153001,GSBRNA2T00146213001,GSBRNA2T00146090001,GSBRNA2T00143128001,GSBRNA2T00121401001,GSBRNA2T00109485001…
GO:BP	metabolic process	GO:0008152	0.537663	0.26949	22188	50	16	80927	GSBRNA2T00130856001,GSBRNA2T00126797001,GSBRNA2T00126938001,GSBRNA2T00021360001,GSBRNA2T00135033001,GSBRNA2T00134859001,GSBRNA2T00146197001,GSBRNA2T00146042001,GSBRNA2T00146102001,GSBRNA2T00146034001,GSBRNA2T00146086001,GSBRNA2T00146222001,GSBRNA2T00146090001,GSBRNA2T00143128001,GSBRNA2T00109485001,GSBRNA2T00109484001
GO:BP	biosynthetic process	GO:0009058	0.537663	0.26949	8269	50	7	80927	GSBRNA2T00126797001,GSBRNA2T00146197001,GSBRNA2T00146222001,GSBRNA2T00146090001,GSBRNA2T00143128001,GSBRNA2T00109485001,GSBRNA2T00109484001
GO:BP	regulation of biosynthetic process	GO:0009889	0.537663	0.26949	3470	50	3	80927	GSBRNA2T00146197001,GSBRNA2T00146222001,GSBRNA2T00109484001
GO:BP	cellular process	GO:0009987	0.537663	0.26949	23307	50	18	80927	GSBRNA2T00087845001,GSBRNA2T00130856001,GSBRNA2T00126797001,GSBRNA2T00021360001,GSBRNA2T00134859001,GSBRNA2T00146197001,GSBRNA2T00146102001,GSBRNA2T00146028001,GSBRNA2T00146034001,GSBRNA2T00146086001,GSBRNA2T00146222001,GSBRNA2T00146153001,GSBRNA2T00146213001,GSBRNA2T00146090001,GSBRNA2T00143128001,GSBRNA2T00121401001,GSBRNA2T00109485001,GSBRNA2T00109484001
GO:BP	regulation of macromolecule biosynthetic process	GO:0010556	0.537663	0.26949	3454	50	3	80927	GSBRNA2T00146197001,GSBRNA2T00146222001,GSBRNA2T00109484001
GO:BP	monovalent inorganic cation transport	GO:0015672	0.537663	0.26949	430	50	1	80927	GSBRNA2T00087845001
GO:BP	regulation of RNA biosynthetic process	GO:2001141	0.537663	0.26949	3361	50	3	80927	GSBRNA2T00146197001,GSBRNA2T00146222001,GSBRNA2T00109484001
GO:BP	electron transport chain	GO:0022900	0.537663	0.26949	342	50	1	80927	GSBRNA2T00130856001
GO:BP	protein ubiquitination	GO:0016567	0.537663	0.26949	413	50	1	80927	GSBRNA2T00134859001
GO:BP	heterocycle biosynthetic process	GO:0018130	0.537663	0.26949	4459	50	4	80927	GSBRNA2T00126797001,GSBRNA2T00146197001,GSBRNA2T00146222001,GSBRNA2T00109484001
GO:BP	regulation of nucleobase-containing compound metabolic process	GO:0019219	0.537663	0.26949	3398	50	3	80927	GSBRNA2T00146197001,GSBRNA2T00146222001,GSBRNA2T00109484001
GO:BP	aromatic compound biosynthetic process	GO:0019438	0.537663	0.26949	4431	50	4	80927	GSBRNA2T00126797001,GSBRNA2T00146197001,GSBRNA2T00146222001,GSBRNA2T00109484001
GO:BP	RNA metabolic process	GO:0016070	0.538613	0.268723	5050	50	4	80927	GSBRNA2T00126797001,GSBRNA2T00146197001,GSBRNA2T00146222001,GSBRNA2T00109484001
GO:BP	regulation of gene expression	GO:0010468	0.538613	0.268723	3654	50	3	80927	GSBRNA2T00146197001,GSBRNA2T00146222001,GSBRNA2T00109484001
GO:BP	macromolecule metabolic process	GO:0043170	0.538613	0.268723	14154	50	10	80927	GSBRNA2T00126797001,GSBRNA2T00134859001,GSBRNA2T00146197001,GSBRNA2T00146042001,GSBRNA2T00146086001,GSBRNA2T00146222001,GSBRNA2T00146090001,GSBRNA2T00143128001,GSBRNA2T00109485001,GSBRNA2T00109484001
GO:BP	cellular protein metabolic process	GO:0044267	0.538613	0.268723	6705	50	5	80927	GSBRNA2T00134859001,GSBRNA2T00146086001,GSBRNA2T00146090001,GSBRNA2T00143128001,GSBRNA2T00109485001
GO:BP	organonitrogen compound metabolic process	GO:1901564	0.538613	0.268723	9713	50	7	80927	GSBRNA2T00021360001,GSBRNA2T00134859001,GSBRNA2T00146042001,GSBRNA2T00146086001,GSBRNA2T00146090001,GSBRNA2T00143128001,GSBRNA2T00109485001
GO:BP	protein metabolic process	GO:0019538	0.538613	0.268723	8003	50	6	80927	GSBRNA2T00134859001,GSBRNA2T00146042001,GSBRNA2T00146086001,GSBRNA2T00146090001,GSBRNA2T00143128001,GSBRNA2T00109485001
GO:BP	regulation of primary metabolic process	GO:0080090	0.538613	0.268723	3691	50	3	80927	GSBRNA2T00146197001,GSBRNA2T00146222001,GSBRNA2T00109484001
GO:BP	regulation of nitrogen compound metabolic process	GO:0051171	0.538613	0.268723	3675	50	3	80927	GSBRNA2T00146197001,GSBRNA2T00146222001,GSBRNA2T00109484001
GO:BP	cellular amino acid metabolic process	GO:0006520	0.541758	0.266194	853	50	1	80927	GSBRNA2T00021360001
GO:BP	regulation of cellular metabolic process	GO:0031323	0.541758	0.266194	3760	50	3	80927	GSBRNA2T00146197001,GSBRNA2T00146222001,GSBRNA2T00109484001
GO:BP	cation transport	GO:0006812	0.560646	0.251312	908	50	1	80927	GSBRNA2T00087845001
GO:BP	regulation of metabolic process	GO:0019222	0.575755	0.239762	4035	50	3	80927	GSBRNA2T00146197001,GSBRNA2T00146222001,GSBRNA2T00109484001
GO:BP	nucleic acid metabolic process	GO:0090304	0.575755	0.239762	5577	50	4	80927	GSBRNA2T00126797001,GSBRNA2T00146197001,GSBRNA2T00146222001,GSBRNA2T00109484001
GO:BP	regulation of macromolecule metabolic process	GO:0060255	0.575755	0.239762	3989	50	3	80927	GSBRNA2T00146197001,GSBRNA2T00146222001,GSBRNA2T00109484001
GO:BP	organophosphate metabolic process	GO:0019637	0.587567	0.230942	1027	50	1	80927	GSBRNA2T00146034001
GO:BP	transport	GO:0006810	0.609217	0.215228	4306	50	3	80927	GSBRNA2T00087845001,GSBRNA2T00146213001,GSBRNA2T00121401001
GO:BP	carbohydrate derivative metabolic process	GO:1901135	0.609217	0.215228	1097	50	1	80927	GSBRNA2T00146034001
GO:BP	establishment of localization	GO:0051234	0.609217	0.215228	4331	50	3	80927	GSBRNA2T00087845001,GSBRNA2T00146213001,GSBRNA2T00121401001
GO:BP	localization	GO:0051179	0.60954	0.214998	4366	50	3	80927	GSBRNA2T00087845001,GSBRNA2T00146213001,GSBRNA2T00121401001
GO:BP	nucleobase-containing compound metabolic process	GO:0006139	0.644035	0.191091	6262	50	4	80927	GSBRNA2T00126797001,GSBRNA2T00146197001,GSBRNA2T00146222001,GSBRNA2T00109484001
GO:BP	lipid metabolic process	GO:0006629	0.644035	0.191091	1321	50	1	80927	GSBRNA2T00126938001
GO:BP	response to stimulus	GO:0050896	0.644035	0.191091	2968	50	2	80927	GSBRNA2T00146028001,GSBRNA2T00146153001
GO:BP	phosphorus metabolic process	GO:0006793	0.644035	0.191091	4739	50	3	80927	GSBRNA2T00130856001,GSBRNA2T00146034001,GSBRNA2T00146086001
GO:BP	phosphate-containing compound metabolic process	GO:0006796	0.644035	0.191091	4724	50	3	80927	GSBRNA2T00130856001,GSBRNA2T00146034001,GSBRNA2T00146086001
GO:BP	heterocycle metabolic process	GO:0046483	0.654081	0.184368	6658	50	4	80927	GSBRNA2T00126797001,GSBRNA2T00146197001,GSBRNA2T00146222001,GSBRNA2T00109484001
GO:BP	carboxylic acid metabolic process	GO:0019752	0.654081	0.184368	1458	50	1	80927	GSBRNA2T00021360001
GO:BP	organic acid metabolic process	GO:0006082	0.654081	0.184368	1474	50	1	80927	GSBRNA2T00021360001
GO:BP	cellular aromatic compound metabolic process	GO:0006725	0.654081	0.184368	6709	50	4	80927	GSBRNA2T00126797001,GSBRNA2T00146197001,GSBRNA2T00146222001,GSBRNA2T00109484001
GO:BP	oxoacid metabolic process	GO:0043436	0.654081	0.184368	1470	50	1	80927	GSBRNA2T00021360001
GO:BP	organic cyclic compound metabolic process	GO:1901360	0.658408	0.181505	6789	50	4	80927	GSBRNA2T00126797001,GSBRNA2T00146197001,GSBRNA2T00146222001,GSBRNA2T00109484001
GO:BP	phosphorylation	GO:0016310	0.670884	0.173353	3425	50	2	80927	GSBRNA2T00130856001,GSBRNA2T00146086001
GO:BP	proteolysis	GO:0006508	0.690463	0.16086	1704	50	1	80927	GSBRNA2T00146042001
GO:BP	carbohydrate metabolic process	GO:0005975	0.773805	0.111369	2155	50	1	80927	GSBRNA2T00146034001
GO:BP	small molecule metabolic process	GO:0044281	0.79991	0.0969591	2361	50	1	80927	GSBRNA2T00021360001
GO:BP	cellular protein modification process	GO:0006464	0.815615	0.0885149	4767	50	2	80927	GSBRNA2T00134859001,GSBRNA2T00146086001
GO:BP	protein modification process	GO:0036211	0.815615	0.0885149	4767	50	2	80927	GSBRNA2T00134859001,GSBRNA2T00146086001
GO:BP	macromolecule modification	GO:0043412	0.831988	0.0798827	5020	50	2	80927	GSBRNA2T00134859001,GSBRNA2T00146086001
GO:BP	protein phosphorylation	GO:0006468	0.846481	0.0723827	2976	50	1	80927	GSBRNA2T00146086001
